# Supplementary material for: Mapping the sequence logic of DNA repair enzyme binding reveals mechanistic principles and evolutionary links
Source: Research Square preprint supplement (doi:10.21203/rs.3.rs-7972250/v1), 2025-11-10
Supplement: Supplementary file 1 [file 5a82348cfa7c84c6cfa7d86c.xlsx]

## Sheet: UDG
feature	coef	abs
mono__pos_-1_C	-0.71494	0.71494
mono__pos_1_A	0.646516	0.646516
mono__pos_2_T	0.428488	0.428488
di__di_-1_1_GA	0.368216	0.368216
di__di_1_2_AA	0.356829	0.356829
di__di_1_2_CC	-0.333578	0.333578
di__di_-2_-1_AA	0.280664	0.280664
di__di_-1_1_TC	0.24059	0.24059
di__di_-1_1_TT	-0.218293	0.218293
di__di_-2_-1_TA	-0.216608	0.216608
di__di_-1_1_GG	0.19541	0.19541
di__di_1_2_AT	0.186201	0.186201
di__di_-2_-1_CG	0.171496	0.171496
di__di_2_3_CC	-0.170344	0.170344
di__di_-2_-1_GA	0.149851	0.149851
di__di_-2_-1_CT	-0.148377	0.148377
di__di_2_3_AG	-0.14006	0.14006
mono__pos_3_C	-0.134516	0.134516
di__di_2_3_GG	-0.132197	0.132197
mono__pos_1_T	-0.120494	0.120494
di__di_1_2_GC	0.120115	0.120115
di__di_2_3_AA	0.11603	0.11603
mono__pos_-2_C	-0.101309	0.101309
mono__pos_2_C	-0.0873537	0.0873537
di__di_2_3_GA	-0.0848233	0.0848233
di__di_1_2_GA	-0.0828605	0.0828605
di__di_2_3_GC	0.0767786	0.0767786
di__di_-1_1_CC	-0.0738302	0.0738302
di__di_-2_-1_AT	0.0733824	0.0733824
di__di_2_3_TG	0.0705263	0.0705263
di__di_-2_-1_AG	-0.0582937	0.0582937
di__di_1_2_CT	-0.0559286	0.0559286
di__di_1_2_AG	-0.0503459	0.0503459
mono__pos_2_G	-0.0369219	0.0369219
mono__pos_3_T	0.034186	0.034186
mono__pos_1_G	0.0261326	0.0261326
di__di_1_2_GT	0.0247676	0.0247676
mono__pos_-1_G	0.0238925	0.0238925
mono__pos_-2_G	0.0167239	0.0167239
di__di_2_3_AT	0.0120056	0.0120056

## Sheet: TDG
feature	coef	abs
mono__pos_1_G	0.990916	0.990916
mono__pos_1_T	-0.548774	0.548774
mono__pos_1_C	-0.422426	0.422426
di__di_1_2_CG	0.320644	0.320644
di__di_2_3_CG	0.298203	0.298203
di__di_-1_1_GG	0.216034	0.216034
di__di_1_2_CC	-0.21396	0.21396
di__di_-3_-2_CG	0.202402	0.202402
mono__pos_3_C	0.198414	0.198414
di__di_-1_1_GT	-0.198322	0.198322
di__di_1_2_CT	-0.179528	0.179528
di__di_-3_-2_CA	0.151916	0.151916
di__di_1_2_TA	-0.149975	0.149975
di__di_2_3_TC	0.148682	0.148682
mono__pos_-1_A	-0.147726	0.147726
di__di_1_2_AG	0.141138	0.141138
di__di_-1_1_AC	-0.137531	0.137531
di__di_-2_-1_AA	-0.132148	0.132148
di__di_2_3_GC	0.129085	0.129085
di__di_-2_-1_CA	0.115941	0.115941
di__di_-3_-2_TC	-0.110581	0.110581
mono__pos_-3_T	-0.10374	0.10374
di__di_-1_1_TC	0.0956792	0.0956792
di__di_-1_1_TA	0.0871666	0.0871666
di__di_1_2_AT	0.0865826	0.0865826
mono__pos_3_G	-0.084125	0.084125
di__di_-3_-2_CT	-0.0830751	0.0830751
mono__pos_-1_G	0.080352	0.080352
di__di_-1_1_CT	0.0711338	0.0711338
di__di_2_3_AG	-0.067256	0.067256
di__di_2_3_CA	0.0666979	0.0666979
mono__pos_-2_G	-0.0664049	0.0664049
di__di_-3_-2_AG	-0.0637808	0.0637808
mono__pos_-3_G	0.0591087	0.0591087
di__di_-3_-2_GA	0.0506765	0.0506765
mono__pos_2_A	-0.0456462	0.0456462
di__di_1_2_GC	0.0410565	0.0410565
di__di_2_3_CC	-0.0402909	0.0402909
di__di_2_3_CT	-0.0395856	0.0395856
di__di_2_3_AT	0.0372204	0.0372204
di__di_2_3_TT	-0.0371833	0.0371833
mono__pos_1_A	0.0367016	0.0367016
di__di_-2_-1_AT	0.0325885	0.0325885
di__di_2_3_GT	0.0320934	0.0320934
di__di_-1_1_AG	0.0305021	0.0305021
di__di_-2_-1_GG	0.0298782	0.0298782
di__di_1_2_GG	-0.02881	0.02881
di__di_-1_1_CC	-0.0284621	0.0284621
di__di_-3_-2_CC	-0.0271579	0.0271579
mono__pos_-1_C	-0.0244931	0.0244931
di__di_-3_-2_AA	-0.0229743	0.0229743
mono__pos_-2_T	0.0136683	0.0136683
di__di_2_3_GA	-0.0108482	0.0108482
di__di_-2_-1_TT	0.00910781	0.00910781
di__di_-3_-2_GG	-0.00751014	0.00751014
di__di_-3_-2_AT	0.00444992	0.00444992
di__di_1_2_TC	0.00372018	0.00372018
di__di_-2_-1_TC	-0.00343406	0.00343406
mono__pos_-1_T	0.000683454	0.000683454
di__di_-3_-2_AC	0.000663861	0.000663861
di__di_-2_-1_TG	0.000514059	0.000514059
