# Supplementary material for: Mapping the sequence logic of DNA repair enzyme binding reveals mechanistic principles and evolutionary links
Source: Research Square preprint supplement (doi:10.21203/rs.3.rs-7972250/v1), 2025-11-10
Supplement: Supplementary file 2 [file 9aff15e22260ebe156519779.xlsx]

## Sheet: README
README – Description of Excel Sheets (TDG microarray data)
Each sheet corresponds to a different experiment or processing stage for TDG binding or excision data, as described below:
Sheet name	binding data	ARP (product formation)	Design (5' to 3' flanks around T:G damage with N=A/C/T/G, T=T:G damage)	Data type	Used in
1-binding_NNNTNNN_processed_normalized	V		NNNTNNN	Processed & normalized (see notes and Methods)	Main figures on TDG binding
2-binding_NNNTNNNN_raw	V		NNNTNNNN	Raw	This is the raw data used for the main figures on TDG binding. Note that due to symmetry considerations, the +4 position was typically averaged out after normalization to yield a centered ±3 NNNTNNN context.
3-ARP_NNTNNNN_raw_forBindingCor		V	NNTNNNN	Raw	Correlation with binding (Supp. Fig. 4)
4-binding_NNTNNNN_raw_forARPCor	V		NNTNNNN	Raw	Correlation with ARP (Supp. Fig. 4)
Notes:
Binding refers to fluorescent protein-binding measurements using His-tagged human TDG on libraries containing T:G mispairs.
ARP (product formation) refers to labeling of abasic sites formed upon TDG excision, detected using the Aldehyde Reactive Probe.
Processed & normalized data includes MASLINER-corrected fluorescence values, background-subtracted and normalized across probes (see Methods).
Raw data includes the unprocessed median signal values from array scans.

## Sheet: binding_NNNTNNN_processed_norma
Flanks	ln_FI_normalized
AAATAAA	8.09652
AAATAAC	8.50098
AAATAAG	7.97928
AAATAAT	8.23948
AAATACA	8.3505
AAATACC	8.43759
AAATACG	8.62059
AAATACT	8.21425
AAATAGA	8.4493
AAATAGC	8.89683
AAATAGG	8.4034
AAATAGT	8.50916
AAATATA	8.51493
AAATATC	8.70741
AAATATG	8.33792
AAATATT	8.26889
AAATCAA	7.68934
AAATCAC	7.89234
AAATCAG	7.37654
AAATCAT	7.84745
AAATCCA	7.43039
AAATCCC	7.40938
AAATCCG	8.10394
AAATCCT	7.12181
AAATCGA	7.85627
AAATCGC	8.48274
AAATCGG	8.05946
AAATCGT	8.20117
AAATCTA	7.10582
AAATCTC	7.78174
AAATCTG	7.48571
AAATCTT	7.1508
AAATGAA	9.4049
AAATGAC	9.47005
AAATGAG	9.22551
AAATGAT	9.54044
AAATGCA	9.66505
AAATGCC	9.42461
AAATGCG	9.54231
AAATGCT	9.5133
AAATGGA	9.45985
AAATGGC	9.52148
AAATGGG	9.24459
AAATGGT	9.50929
AAATGTA	9.53704
AAATGTC	9.60638
AAATGTG	9.24628
AAATGTT	9.43593
AAATTAA	7.50663
AAATTAC	7.6921
AAATTAG	7.23198
AAATTAT	7.41766
AAATTCA	7.68456
AAATTCC	7.89131
AAATTCG	8.16569
AAATTCT	7.23333
AAATTGA	7.42591
AAATTGC	8.27913
AAATTGG	7.68236
AAATTGT	7.78068
AAATTTA	7.69932
AAATTTC	7.80207
AAATTTG	7.37092
AAATTTT	7.66794
AACTAAA	8.56075
AACTAAC	8.69773
AACTAAG	8.46523
AACTAAT	8.62578
AACTACA	8.58516
AACTACC	8.76064
AACTACG	8.73286
AACTACT	8.61021
AACTAGA	8.64198
AACTAGC	9.11827
AACTAGG	8.51398
AACTAGT	8.67217
AACTATA	8.765
AACTATC	9.14833
AACTATG	8.64588
AACTATT	8.72628
AACTCAA	7.86494
AACTCAC	8.17428
AACTCAG	7.85973
AACTCAT	7.92138
AACTCCA	7.74654
AACTCCC	7.89317
AACTCCG	8.12237
AACTCCT	7.7025
AACTCGA	8.17826
AACTCGC	8.66149
AACTCGG	8.15634
AACTCGT	8.30382
AACTCTA	7.77042
AACTCTC	8.22597
AACTCTG	7.71688
AACTCTT	7.68855
AACTGAA	9.62346
AACTGAC	9.65125
AACTGAG	9.45386
AACTGAT	9.69242
AACTGCA	9.76883
AACTGCC	9.69926
AACTGCG	9.66801
AACTGCT	9.73018
AACTGGA	9.64696
AACTGGC	9.67794
AACTGGG	9.42801
AACTGGT	9.65652
AACTGTA	9.72053
AACTGTC	9.84344
AACTGTG	9.50051
AACTGTT	9.67982
AACTTAA	7.79364
AACTTAC	8.0428
AACTTAG	7.27699
AACTTAT	7.94791
AACTTCA	8.14386
AACTTCC	8.28508
AACTTCG	8.39232
AACTTCT	8.04663
AACTTGA	7.83223
AACTTGC	8.31677
AACTTGG	7.77268
AACTTGT	7.90455
AACTTTA	8.15902
AACTTTC	8.50089
AACTTTG	7.96594
AACTTTT	8.18661
AAGTAAA	8.66709
AAGTAAC	8.97794
AAGTAAG	8.49002
AAGTAAT	8.76216
AAGTACA	8.71214
AAGTACC	8.93628
AAGTACG	8.85873
AAGTACT	8.80451
AAGTAGA	9.1714
AAGTAGC	9.53206
AAGTAGG	8.88228
AAGTAGT	9.06865
AAGTATA	8.89017
AAGTATC	9.54757
AAGTATG	8.71139
AAGTATT	8.71647
AAGTCAA	7.77519
AAGTCAC	8.48238
AAGTCAG	7.67946
AAGTCAT	8.04881
AAGTCCA	7.93106
AAGTCCC	8.17075
AAGTCCG	8.16866
AAGTCCT	7.90626
AAGTCGA	8.67894
AAGTCGC	9.36514
AAGTCGG	8.56508
AAGTCGT	8.63325
AAGTCTA	8.36763
AAGTCTC	9.33586
AAGTCTG	7.97111
AAGTCTT	8.15355
AAGTGAA	10.0153
AAGTGAC	10.1076
AAGTGAG	9.91643
AAGTGAT	10.0495
AAGTGCA	10.1814
AAGTGCC	10.1553
AAGTGCG	10.1342
AAGTGCT	10.1433
AAGTGGA	10.0864
AAGTGGC	10.1176
AAGTGGG	9.976
AAGTGGT	10.0879
AAGTGTA	10.1881
AAGTGTC	10.232
AAGTGTG	10.0257
AAGTGTT	10.1689
AAGTTAA	7.40381
AAGTTAC	7.77816
AAGTTAG	6.88704
AAGTTAT	7.05377
AAGTTCA	7.73178
AAGTTCC	8.17419
AAGTTCG	8.12536
AAGTTCT	7.60715
AAGTTGA	7.35788
AAGTTGC	8.27913
AAGTTGG	7.63747
AAGTTGT	7.74019
AAGTTTA	7.71114
AAGTTTC	8.41879
AAGTTTG	7.52269
AAGTTTT	7.65354
AATTAAA	8.59581
AATTAAC	8.85184
AATTAAG	8.50146
AATTAAT	8.60802
AATTACA	8.75523
AATTACC	8.82551
AATTACG	8.84105
AATTACT	8.65567
AATTAGA	8.9697
AATTAGC	9.37743
AATTAGG	8.81091
AATTAGT	8.95468
AATTATA	8.78414
AATTATC	9.2017
AATTATG	8.68399
AATTATT	8.61995
AATTCAA	8.001
AATTCAC	8.33102
AATTCAG	7.98917
AATTCAT	7.97075
AATTCCA	7.9218
AATTCCC	7.78712
AATTCCG	8.32172
AATTCCT	7.57642
AATTCGA	8.35221
AATTCGC	8.83958
AATTCGG	8.48802
AATTCGT	8.36893
AATTCTA	7.67006
AATTCTC	8.28697
AATTCTG	7.83668
AATTCTT	7.55729
AATTGAA	9.65349
AATTGAC	9.70223
AATTGAG	9.50371
AATTGAT	9.71987
AATTGCA	9.93519
AATTGCC	9.74137
AATTGCG	9.83876
AATTGCT	9.84723
AATTGGA	9.72197
AATTGGC	9.80116
AATTGGG	9.58367
AATTGGT	9.77512
AATTGTA	9.83175
AATTGTC	9.92626
AATTGTG	9.62544
AATTGTT	9.67915
AATTTAA	7.60368
AATTTAC	7.78538
AATTTAG	7.29319
AATTTAT	7.59511
AATTTCA	7.84584
AATTTCC	8.27429
AATTTCG	8.19967
AATTTCT	7.98498
AATTTGA	7.79265
AATTTGC	8.50987
AATTTGG	7.93643
AATTTGT	7.77139
AATTTTA	7.82405
AATTTTC	8.253
AATTTTG	7.85439
AATTTTT	7.76468
ACATAAA	8.46959
ACATAAC	8.7336
ACATAAG	8.38557
ACATAAT	8.57393
ACATACA	8.62455
ACATACC	8.77237
ACATACG	8.78968
ACATACT	8.4893
ACATAGA	8.84627
ACATAGC	9.17392
ACATAGG	8.75847
ACATAGT	8.87764
ACATATA	8.67728
ACATATC	9.07198
ACATATG	8.59223
ACATATT	8.64222
ACATCAA	7.94555
ACATCAC	8.23322
ACATCAG	7.80947
ACATCAT	8.03257
ACATCCA	7.9011
ACATCCC	7.86
ACATCCG	8.22195
ACATCCT	7.72299
ACATCGA	8.26121
ACATCGC	8.78049
ACATCGG	8.41685
ACATCGT	8.37946
ACATCTA	7.84002
ACATCTC	8.21494
ACATCTG	7.62117
ACATCTT	7.74799
ACATGAA	9.78755
ACATGAC	9.79613
ACATGAG	9.56362
ACATGAT	9.76972
ACATGCA	9.94817
ACATGCC	9.77266
ACATGCG	9.87465
ACATGCT	9.86654
ACATGGA	9.89889
ACATGGC	9.90509
ACATGGG	9.64628
ACATGGT	9.86858
ACATGTA	9.86048
ACATGTC	9.93662
ACATGTG	9.62996
ACATGTT	9.74758
ACATTAA	7.77121
ACATTAC	8.03394
ACATTAG	7.70627
ACATTAT	7.76567
ACATTCA	7.91983
ACATTCC	8.06638
ACATTCG	8.2555
ACATTCT	7.78285
ACATTGA	7.64973
ACATTGC	8.29789
ACATTGG	7.8488
ACATTGT	7.8221
ACATTTA	8.00115
ACATTTC	8.25142
ACATTTG	7.90375
ACATTTT	8.06312
ACCTAAA	8.59313
ACCTAAC	8.81323
ACCTAAG	8.42369
ACCTAAT	8.69946
ACCTACA	8.56712
ACCTACC	8.74967
ACCTACG	8.72735
ACCTACT	8.6067
ACCTAGA	8.76481
ACCTAGC	9.14008
ACCTAGG	8.60543
ACCTAGT	8.77882
ACCTATA	8.74075
ACCTATC	9.16295
ACCTATG	8.6042
ACCTATT	8.68433
ACCTCAA	7.93779
ACCTCAC	8.20412
ACCTCAG	7.84779
ACCTCAT	8.02448
ACCTCCA	8.05171
ACCTCCC	7.84819
ACCTCCG	8.3213
ACCTCCT	7.34853
ACCTCGA	8.28993
ACCTCGC	8.74206
ACCTCGG	8.17146
ACCTCGT	8.38275
ACCTCTA	7.78669
ACCTCTC	8.35338
ACCTCTG	7.82158
ACCTCTT	7.80002
ACCTGAA	9.64906
ACCTGAC	9.73399
ACCTGAG	9.49302
ACCTGAT	9.76113
ACCTGCA	9.92866
ACCTGCC	9.75499
ACCTGCG	9.83608
ACCTGCT	9.86822
ACCTGGA	9.73133
ACCTGGC	9.79123
ACCTGGG	9.55779
ACCTGGT	9.72699
ACCTGTA	9.8005
ACCTGTC	9.84705
ACCTGTG	9.59819
ACCTGTT	9.79032
ACCTTAA	7.99491
ACCTTAC	8.02397
ACCTTAG	7.58898
ACCTTAT	7.73736
ACCTTCA	8.10953
ACCTTCC	8.46643
ACCTTCG	8.36887
ACCTTCT	8.12595
ACCTTGA	7.858
ACCTTGC	8.36535
ACCTTGG	7.93823
ACCTTGT	7.84216
ACCTTTA	8.20347
ACCTTTC	8.52065
ACCTTTG	8.04914
ACCTTTT	8.15346
ACGTAAA	8.57383
ACGTAAC	8.878
ACGTAAG	8.44047
ACGTAAT	8.60112
ACGTACA	8.70552
ACGTACC	8.80919
ACGTACG	8.78908
ACGTACT	8.67088
ACGTAGA	8.96394
ACGTAGC	9.28033
ACGTAGG	8.69995
ACGTAGT	8.79308
ACGTATA	8.77836
ACGTATC	9.23529
ACGTATG	8.66651
ACGTATT	8.69656
ACGTCAA	8.09531
ACGTCAC	8.37104
ACGTCAG	7.99075
ACGTCAT	8.20179
ACGTCCA	7.89705
ACGTCCC	8.08494
ACGTCCG	8.18887
ACGTCCT	7.80131
ACGTCGA	8.48573
ACGTCGC	8.96649
ACGTCGG	8.44114
ACGTCGT	8.53491
ACGTCTA	8.19698
ACGTCTC	8.78243
ACGTCTG	7.97716
ACGTCTT	8.00802
ACGTGAA	9.72053
ACGTGAC	9.83513
ACGTGAG	9.66388
ACGTGAT	9.81834
ACGTGCA	10.0583
ACGTGCC	9.86286
ACGTGCG	9.90618
ACGTGCT	9.93767
ACGTGGA	9.82729
ACGTGGC	9.9569
ACGTGGG	9.73147
ACGTGGT	9.88331
ACGTGTA	9.93928
ACGTGTC	10.0032
ACGTGTG	9.73064
ACGTGTT	9.86766
ACGTTAA	7.97688
ACGTTAC	8.21768
ACGTTAG	7.69739
ACGTTAT	8.09301
ACGTTCA	8.20404
ACGTTCC	8.32535
ACGTTCG	8.4237
ACGTTCT	7.90452
ACGTTGA	7.98929
ACGTTGC	8.52428
ACGTTGG	8.10059
ACGTTGT	8.15058
ACGTTTA	8.1235
ACGTTTC	8.46384
ACGTTTG	8.02425
ACGTTTT	8.10866
ACTTAAA	8.68511
ACTTAAC	8.95161
ACTTAAG	8.63517
ACTTAAT	8.72906
ACTTACA	8.78976
ACTTACC	8.87033
ACTTACG	8.82486
ACTTACT	8.67449
ACTTAGA	9.14008
ACTTAGC	9.47691
ACTTAGG	8.94508
ACTTAGT	9.03015
ACTTATA	8.93856
ACTTATC	9.39057
ACTTATG	8.7395
ACTTATT	8.72297
ACTTCAA	8.14126
ACTTCAC	8.4056
ACTTCAG	8.17774
ACTTCAT	8.33836
ACTTCCA	8.0706
ACTTCCC	8.04068
ACTTCCG	8.36436
ACTTCCT	7.71343
ACTTCGA	8.48439
ACTTCGC	8.99103
ACTTCGG	8.527
ACTTCGT	8.549
ACTTCTA	7.96999
ACTTCTC	8.33542
ACTTCTG	7.96292
ACTTCTT	7.83187
ACTTGAA	9.72228
ACTTGAC	9.81717
ACTTGAG	9.61549
ACTTGAT	9.83566
ACTTGCA	10.0411
ACTTGCC	9.87253
ACTTGCG	9.94286
ACTTGCT	9.88371
ACTTGGA	9.83045
ACTTGGC	9.9195
ACTTGGG	9.70313
ACTTGGT	9.88309
ACTTGTA	9.91777
ACTTGTC	9.96915
ACTTGTG	9.72548
ACTTGTT	9.80054
ACTTTAA	7.72478
ACTTTAC	8.06713
ACTTTAG	7.31714
ACTTTAT	7.7193
ACTTTCA	7.97718
ACTTTCC	8.31334
ACTTTCG	8.28474
ACTTTCT	7.86459
ACTTTGA	7.73806
ACTTTGC	8.4897
ACTTTGG	7.89334
ACTTTGT	7.84936
ACTTTTA	7.99125
ACTTTTC	8.30318
ACTTTTG	7.78732
ACTTTTT	7.833
AGATAAA	7.87888
AGATAAC	8.40604
AGATAAG	7.9689
AGATAAT	8.3103
AGATACA	8.27123
AGATACC	8.37197
AGATACG	8.51348
AGATACT	8.2771
AGATAGA	8.49514
AGATAGC	8.80222
AGATAGG	8.30856
AGATAGT	8.32742
AGATATA	8.43993
AGATATC	8.673
AGATATG	8.27854
AGATATT	8.26412
AGATCAA	7.42865
AGATCAC	7.97476
AGATCAG	7.55836
AGATCAT	7.76897
AGATCCA	7.63841
AGATCCC	7.52378
AGATCCG	8.12096
AGATCCT	6.50998
AGATCGA	8.1242
AGATCGC	8.49613
AGATCGG	8.14366
AGATCGT	8.24054
AGATCTA	6.8676
AGATCTC	7.77316
AGATCTG	7.45515
AGATCTT	7.13346
AGATGAA	9.30053
AGATGAC	9.4568
AGATGAG	9.17021
AGATGAT	9.43749
AGATGCA	9.59832
AGATGCC	9.29845
AGATGCG	9.43909
AGATGCT	9.47793
AGATGGA	9.46134
AGATGGC	9.52384
AGATGGG	9.18129
AGATGGT	9.47652
AGATGTA	9.41898
AGATGTC	9.56809
AGATGTG	9.26517
AGATGTT	9.37202
AGATTAA	7.19305
AGATTAC	7.72094
AGATTAG	7.42806
AGATTAT	7.26304
AGATTCA	7.63501
AGATTCC	7.88748
AGATTCG	8.10977
AGATTCT	7.5633
AGATTGA	7.26541
AGATTGC	8.14716
AGATTGG	7.52061
AGATTGT	7.56074
AGATTTA	7.35684
AGATTTC	7.71388
AGATTTG	7.30406
AGATTTT	7.591
AGCTAAA	8.40791
AGCTAAC	8.58615
AGCTAAG	8.2972
AGCTAAT	8.41711
AGCTACA	8.50077
AGCTACC	8.67266
AGCTACG	8.64458
AGCTACT	8.5024
AGCTAGA	8.54639
AGCTAGC	8.91881
AGCTAGG	8.37206
AGCTAGT	8.64553
AGCTATA	8.55327
AGCTATC	9.01661
AGCTATG	8.44875
AGCTATT	8.59844
AGCTCAA	7.88424
AGCTCAC	8.10112
AGCTCAG	7.67784
AGCTCAT	7.90143
AGCTCCA	7.69795
AGCTCCC	7.88514
AGCTCCG	8.20754
AGCTCCT	7.60934
AGCTCGA	8.2872
AGCTCGC	8.57615
AGCTCGG	8.06564
AGCTCGT	8.21201
AGCTCTA	7.69611
AGCTCTC	8.14699
AGCTCTG	7.83869
AGCTCTT	7.78543
AGCTGAA	9.51249
AGCTGAC	9.53648
AGCTGAG	9.32873
AGCTGAT	9.63861
AGCTGCA	9.76323
AGCTGCC	9.59115
AGCTGCG	9.70109
AGCTGCT	9.7384
AGCTGGA	9.57491
AGCTGGC	9.60822
AGCTGGG	9.45619
AGCTGGT	9.64679
AGCTGTA	9.64915
AGCTGTC	9.77705
AGCTGTG	9.44196
AGCTGTT	9.59665
AGCTTAA	7.69727
AGCTTAC	8.09244
AGCTTAG	7.53618
AGCTTAT	7.87636
AGCTTCA	7.88554
AGCTTCC	8.21751
AGCTTCG	8.1727
AGCTTCT	7.95551
AGCTTGA	7.71401
AGCTTGC	8.23747
AGCTTGG	7.7869
AGCTTGT	7.94127
AGCTTTA	8.02378
AGCTTTC	8.21222
AGCTTTG	7.90465
AGCTTTT	8.06699
AGGTAAA	8.58493
AGGTAAC	9.05568
AGGTAAG	8.41492
AGGTAAT	8.71088
AGGTACA	8.65586
AGGTACC	8.96311
AGGTACG	8.80117
AGGTACT	8.77012
AGGTAGA	9.02539
AGGTAGC	9.53557
AGGTAGG	8.87349
AGGTAGT	8.99248
AGGTATA	8.87155
AGGTATC	9.49266
AGGTATG	8.60897
AGGTATT	8.70849
AGGTCAA	7.92432
AGGTCAC	8.57598
AGGTCAG	7.80613
AGGTCAT	8.09814
AGGTCCA	8.04113
AGGTCCC	8.12006
AGGTCCG	8.25425
AGGTCCT	8.07089
AGGTCGA	8.73939
AGGTCGC	9.44314
AGGTCGG	8.67215
AGGTCGT	8.64169
AGGTCTA	8.47598
AGGTCTC	9.39884
AGGTCTG	8.13168
AGGTCTT	8.38572
AGGTGAA	9.97072
AGGTGAC	10.0674
AGGTGAG	9.84058
AGGTGAT	10.094
AGGTGCA	10.1751
AGGTGCC	10.0736
AGGTGCG	10.1079
AGGTGCT	10.0951
AGGTGGA	10.0381
AGGTGGC	10.1201
AGGTGGG	9.95523
AGGTGGT	10.0468
AGGTGTA	10.0777
AGGTGTC	10.2265
AGGTGTG	10.0175
AGGTGTT	10.0623
AGGTTAA	7.50371
AGGTTAC	8.03771
AGGTTAG	7.09498
AGGTTAT	7.54546
AGGTTCA	7.6363
AGGTTCC	8.03682
AGGTTCG	8.06298
AGGTTCT	7.52012
AGGTTGA	7.55069
AGGTTGC	8.33797
AGGTTGG	7.65799
AGGTTGT	7.75757
AGGTTTA	7.69864
AGGTTTC	8.24089
AGGTTTG	7.49644
AGGTTTT	7.66668
AGTTAAA	8.47398
AGTTAAC	8.68264
AGTTAAG	8.32712
AGTTAAT	8.46549
AGTTACA	8.63266
AGTTACC	8.71855
AGTTACG	8.73841
AGTTACT	8.50273
AGTTAGA	8.74581
AGTTAGC	9.15122
AGTTAGG	8.6101
AGTTAGT	8.69317
AGTTATA	8.47898
AGTTATC	9.08064
AGTTATG	8.57412
AGTTATT	8.50845
AGTTCAA	8.00146
AGTTCAC	8.2857
AGTTCAG	7.90098
AGTTCAT	8.0077
AGTTCCA	8.00951
AGTTCCC	7.82365
AGTTCCG	8.18003
AGTTCCT	7.62821
AGTTCGA	8.27749
AGTTCGC	8.79132
AGTTCGG	8.3339
AGTTCGT	8.44293
AGTTCTA	7.74076
AGTTCTC	8.12582
AGTTCTG	7.83567
AGTTCTT	7.5367
AGTTGAA	9.52944
AGTTGAC	9.65706
AGTTGAG	9.40053
AGTTGAT	9.66366
AGTTGCA	9.84862
AGTTGCC	9.63072
AGTTGCG	9.76299
AGTTGCT	9.78047
AGTTGGA	9.61157
AGTTGGC	9.71182
AGTTGGG	9.44208
AGTTGGT	9.68808
AGTTGTA	9.67973
AGTTGTC	9.84083
AGTTGTG	9.45263
AGTTGTT	9.62379
AGTTTAA	7.52615
AGTTTAC	7.66132
AGTTTAG	7.12131
AGTTTAT	7.66654
AGTTTCA	7.84028
AGTTTCC	8.16093
AGTTTCG	8.20753
AGTTTCT	7.38954
AGTTTGA	7.72
AGTTTGC	8.43496
AGTTTGG	7.93056
AGTTTGT	7.84666
AGTTTTA	7.72636
AGTTTTC	8.04979
AGTTTTG	7.69891
AGTTTTT	7.75773
ATATAAA	8.39013
ATATAAC	8.69974
ATATAAG	8.33007
ATATAAT	8.58176
ATATACA	8.61832
ATATACC	8.67204
ATATACG	8.7496
ATATACT	8.47937
ATATAGA	8.8092
ATATAGC	9.21767
ATATAGG	8.69457
ATATAGT	8.92525
ATATATA	8.69015
ATATATC	9.11114
ATATATG	8.58447
ATATATT	8.53031
ATATCAA	7.64885
ATATCAC	8.09677
ATATCAG	7.37682
ATATCAT	7.82237
ATATCCA	7.75497
ATATCCC	7.70963
ATATCCG	8.19643
ATATCCT	7.17663
ATATCGA	8.21194
ATATCGC	8.69826
ATATCGG	8.19257
ATATCGT	8.2724
ATATCTA	7.40806
ATATCTC	8.03046
ATATCTG	7.47638
ATATCTT	7.3043
ATATGAA	9.76626
ATATGAC	9.78192
ATATGAG	9.6394
ATATGAT	9.83923
ATATGCA	9.95813
ATATGCC	9.77239
ATATGCG	9.88204
ATATGCT	9.87837
ATATGGA	9.84329
ATATGGC	9.92753
ATATGGG	9.64207
ATATGGT	9.87193
ATATGTA	9.88679
ATATGTC	9.91748
ATATGTG	9.60098
ATATGTT	9.80066
ATATTAA	7.60592
ATATTAC	7.80909
ATATTAG	7.39773
ATATTAT	7.68698
ATATTCA	7.81448
ATATTCC	8.13773
ATATTCG	8.28468
ATATTCT	7.74561
ATATTGA	7.47588
ATATTGC	8.30124
ATATTGG	7.63671
ATATTGT	7.83592
ATATTTA	7.70617
ATATTTC	8.11285
ATATTTG	7.7365
ATATTTT	7.55207
ATCTAAA	8.56838
ATCTAAC	8.78949
ATCTAAG	8.40356
ATCTAAT	8.65733
ATCTACA	8.6581
ATCTACC	8.72695
ATCTACG	8.78686
ATCTACT	8.71117
ATCTAGA	8.72922
ATCTAGC	9.15561
ATCTAGG	8.59634
ATCTAGT	8.80192
ATCTATA	8.6996
ATCTATC	9.17115
ATCTATG	8.58071
ATCTATT	8.62398
ATCTCAA	8.1062
ATCTCAC	8.44826
ATCTCAG	7.82167
ATCTCAT	8.17825
ATCTCCA	8.10972
ATCTCCC	8.04474
ATCTCCG	8.49461
ATCTCCT	7.81226
ATCTCGA	8.29692
ATCTCGC	8.68972
ATCTCGG	8.29165
ATCTCGT	8.37195
ATCTCTA	7.89726
ATCTCTC	8.29713
ATCTCTG	7.81603
ATCTCTT	7.80318
ATCTGAA	9.6557
ATCTGAC	9.73282
ATCTGAG	9.55561
ATCTGAT	9.82079
ATCTGCA	9.91579
ATCTGCC	9.83664
ATCTGCG	9.87963
ATCTGCT	9.96282
ATCTGGA	9.76742
ATCTGGC	9.78768
ATCTGGG	9.53166
ATCTGGT	9.74795
ATCTGTA	9.82643
ATCTGTC	9.92434
ATCTGTG	9.65782
ATCTGTT	9.74534
ATCTTAA	7.91376
ATCTTAC	7.98267
ATCTTAG	7.72042
ATCTTAT	8.01786
ATCTTCA	8.1923
ATCTTCC	8.42375
ATCTTCG	8.29931
ATCTTCT	7.98633
ATCTTGA	7.95866
ATCTTGC	8.39249
ATCTTGG	7.81593
ATCTTGT	8.02994
ATCTTTA	8.11488
ATCTTTC	8.35528
ATCTTTG	7.90422
ATCTTTT	8.13333
ATGTAAA	8.72994
ATGTAAC	9.04004
ATGTAAG	8.57705
ATGTAAT	8.82439
ATGTACA	8.7799
ATGTACC	8.9469
ATGTACG	8.90566
ATGTACT	8.7638
ATGTAGA	9.11857
ATGTAGC	9.54405
ATGTAGG	8.95798
ATGTAGT	9.10411
ATGTATA	9.01322
ATGTATC	9.49196
ATGTATG	8.6618
ATGTATT	8.83441
ATGTCAA	8.00335
ATGTCAC	8.35712
ATGTCAG	7.78445
ATGTCAT	8.002
ATGTCCA	7.76803
ATGTCCC	8.06784
ATGTCCG	8.22059
ATGTCCT	7.54591
ATGTCGA	8.51417
ATGTCGC	9.21738
ATGTCGG	8.44468
ATGTCGT	8.47845
ATGTCTA	8.04682
ATGTCTC	9.11181
ATGTCTG	7.79969
ATGTCTT	7.94452
ATGTGAA	10.1032
ATGTGAC	10.0408
ATGTGAG	10.0152
ATGTGAT	10.1372
ATGTGCA	10.1991
ATGTGCC	10.2032
ATGTGCG	10.195
ATGTGCT	10.1602
ATGTGGA	10.0594
ATGTGGC	10.1812
ATGTGGG	9.97046
ATGTGGT	10.1068
ATGTGTA	10.2142
ATGTGTC	10.1906
ATGTGTG	10.0048
ATGTGTT	10.2179
ATGTTAA	7.707
ATGTTAC	8.0063
ATGTTAG	7.23089
ATGTTAT	7.694
ATGTTCA	7.77664
ATGTTCC	8.23139
ATGTTCG	8.24347
ATGTTCT	7.65618
ATGTTGA	7.81976
ATGTTGC	8.43776
ATGTTGG	7.91588
ATGTTGT	7.75268
ATGTTTA	7.93418
ATGTTTC	8.35913
ATGTTTG	7.71857
ATGTTTT	7.95173
ATTTAAA	8.53554
ATTTAAC	8.94781
ATTTAAG	8.50698
ATTTAAT	8.68382
ATTTACA	8.73635
ATTTACC	8.82207
ATTTACG	8.89475
ATTTACT	8.67111
ATTTAGA	8.90338
ATTTAGC	9.3355
ATTTAGG	8.89914
ATTTAGT	8.88086
ATTTATA	8.72996
ATTTATC	9.26819
ATTTATG	8.70797
ATTTATT	8.66618
ATTTCAA	8.1148
ATTTCAC	8.5501
ATTTCAG	8.18617
ATTTCAT	8.30966
ATTTCCA	8.15858
ATTTCCC	8.07166
ATTTCCG	8.40046
ATTTCCT	7.9292
ATTTCGA	8.55964
ATTTCGC	8.98102
ATTTCGG	8.63961
ATTTCGT	8.59105
ATTTCTA	7.88984
ATTTCTC	8.36288
ATTTCTG	8.02097
ATTTCTT	7.78321
ATTTGAA	9.65087
ATTTGAC	9.69545
ATTTGAG	9.47332
ATTTGAT	9.69683
ATTTGCA	9.93706
ATTTGCC	9.77075
ATTTGCG	9.86439
ATTTGCT	9.84385
ATTTGGA	9.74591
ATTTGGC	9.82373
ATTTGGG	9.5818
ATTTGGT	9.64889
ATTTGTA	9.78343
ATTTGTC	9.92055
ATTTGTG	9.56022
ATTTGTT	9.638
ATTTTAA	7.87359
ATTTTAC	8.01109
ATTTTAG	7.51017
ATTTTAT	7.71419
ATTTTCA	8.15887
ATTTTCC	8.41017
ATTTTCG	8.31497
ATTTTCT	8.04855
ATTTTGA	7.83742
ATTTTGC	8.61039
ATTTTGG	8.0538
ATTTTGT	8.084
ATTTTTA	7.92922
ATTTTTC	8.32778
ATTTTTG	7.84728
ATTTTTT	7.94662
CAATAAA	8.42893
CAATAAC	8.64743
CAATAAG	8.44944
CAATAAT	8.53257
CAATACA	8.49931
CAATACC	8.64439
CAATACG	8.71153
CAATACT	8.48348
CAATAGA	8.66084
CAATAGC	8.97648
CAATAGG	8.60894
CAATAGT	8.72928
CAATATA	8.69131
CAATATC	8.92282
CAATATG	8.61762
CAATATT	8.58046
CAATCAA	7.95818
CAATCAC	8.14201
CAATCAG	7.83526
CAATCAT	7.80884
CAATCCA	7.7345
CAATCCC	7.73992
CAATCCG	8.13158
CAATCCT	7.71533
CAATCGA	8.33761
CAATCGC	8.60712
CAATCGG	8.2681
CAATCGT	8.19007
CAATCTA	7.84911
CAATCTC	8.17378
CAATCTG	7.63589
CAATCTT	7.74835
CAATGAA	9.48318
CAATGAC	9.51587
CAATGAG	9.40253
CAATGAT	9.59716
CAATGCA	9.67882
CAATGCC	9.47694
CAATGCG	9.5387
CAATGCT	9.57969
CAATGGA	9.54743
CAATGGC	9.61804
CAATGGG	9.37726
CAATGGT	9.60272
CAATGTA	9.65045
CAATGTC	9.69945
CAATGTG	9.38605
CAATGTT	9.51848
CAATTAA	7.66748
CAATTAC	8.01511
CAATTAG	7.66156
CAATTAT	7.90371
CAATTCA	7.9792
CAATTCC	8.19668
CAATTCG	8.2847
CAATTCT	7.88324
CAATTGA	7.86863
CAATTGC	8.35294
CAATTGG	8.04216
CAATTGT	8.07133
CAATTTA	7.93047
CAATTTC	8.17954
CAATTTG	7.71422
CAATTTT	7.83518
CACTAAA	8.62233
CACTAAC	8.95555
CACTAAG	8.65181
CACTAAT	8.72266
CACTACA	8.80486
CACTACC	8.94681
CACTACG	8.69458
CACTACT	8.7153
CACTAGA	8.86761
CACTAGC	9.16252
CACTAGG	8.75327
CACTAGT	8.91569
CACTATA	8.91968
CACTATC	9.23166
CACTATG	8.78979
CACTATT	8.84028
CACTCAA	8.16431
CACTCAC	8.3283
CACTCAG	8.03953
CACTCAT	8.28768
CACTCCA	8.06313
CACTCCC	8.34261
CACTCCG	8.25525
CACTCCT	8.05098
CACTCGA	8.43463
CACTCGC	8.79355
CACTCGG	8.33077
CACTCGT	8.44689
CACTCTA	8.08434
CACTCTC	8.42634
CACTCTG	8.00082
CACTCTT	8.01874
CACTGAA	9.60825
CACTGAC	9.71871
CACTGAG	9.46908
CACTGAT	9.74777
CACTGCA	9.8713
CACTGCC	9.76584
CACTGCG	9.77337
CACTGCT	9.85417
CACTGGA	9.69528
CACTGGC	9.7497
CACTGGG	9.50103
CACTGGT	9.68627
CACTGTA	9.81461
CACTGTC	9.90616
CACTGTG	9.66722
CACTGTT	9.75079
CACTTAA	8.14102
CACTTAC	8.3882
CACTTAG	8.0416
CACTTAT	8.1432
CACTTCA	8.29734
CACTTCC	8.50227
CACTTCG	8.45324
CACTTCT	8.21477
CACTTGA	8.12398
CACTTGC	8.60217
CACTTGG	8.14301
CACTTGT	8.2332
CACTTTA	8.2988
CACTTTC	8.54942
CACTTTG	8.34127
CACTTTT	8.26683
CAGTAAA	8.81187
CAGTAAC	9.03443
CAGTAAG	8.64577
CAGTAAT	8.81384
CAGTACA	8.79655
CAGTACC	9.08434
CAGTACG	8.89594
CAGTACT	8.82791
CAGTAGA	9.14695
CAGTAGC	9.57947
CAGTAGG	8.96372
CAGTAGT	9.11401
CAGTATA	8.98507
CAGTATC	9.50754
CAGTATG	8.77399
CAGTATT	8.86491
CAGTCAA	8.12634
CAGTCAC	8.6323
CAGTCAG	7.94662
CAGTCAT	8.27741
CAGTCCA	8.02654
CAGTCCC	8.33178
CAGTCCG	8.34149
CAGTCCT	8.16114
CAGTCGA	8.76881
CAGTCGC	9.45566
CAGTCGG	8.67078
CAGTCGT	8.79513
CAGTCTA	8.48749
CAGTCTC	9.35727
CAGTCTG	8.2627
CAGTCTT	8.26712
CAGTGAA	10.0213
CAGTGAC	10.0565
CAGTGAG	9.89527
CAGTGAT	10.0693
CAGTGCA	10.1645
CAGTGCC	10.1225
CAGTGCG	10.1663
CAGTGCT	10.1101
CAGTGGA	10.067
CAGTGGC	10.0835
CAGTGGG	9.91301
CAGTGGT	10.0565
CAGTGTA	10.1523
CAGTGTC	10.1822
CAGTGTG	9.99977
CAGTGTT	10.1039
CAGTTAA	7.79081
CAGTTAC	7.94995
CAGTTAG	7.46976
CAGTTAT	7.89334
CAGTTCA	7.89513
CAGTTCC	8.30438
CAGTTCG	8.2135
CAGTTCT	7.71898
CAGTTGA	8.05621
CAGTTGC	8.40135
CAGTTGG	7.95255
CAGTTGT	8.12983
CAGTTTA	8.00365
CAGTTTC	8.45252
CAGTTTG	7.89527
CAGTTTT	7.96093
CATTAAA	8.88451
CATTAAC	9.09187
CATTAAG	8.72116
CATTAAT	9.01847
CATTACA	8.95889
CATTACC	9.09682
CATTACG	9.07904
CATTACT	8.96256
CATTAGA	9.13724
CATTAGC	9.44437
CATTAGG	9.02483
CATTAGT	9.12368
CATTATA	8.99942
CATTATC	9.35412
CATTATG	8.94563
CATTATT	8.94517
CATTCAA	8.64815
CATTCAC	8.77186
CATTCAG	8.55093
CATTCAT	8.70001
CATTCCA	8.53124
CATTCCC	8.46259
CATTCCG	8.66209
CATTCCT	8.30998
CATTCGA	8.87683
CATTCGC	9.1585
CATTCGG	8.84872
CATTCGT	8.86567
CATTCTA	8.42748
CATTCTC	8.65111
CATTCTG	8.55969
CATTCTT	8.45073
CATTGAA	9.65573
CATTGAC	9.76844
CATTGAG	9.58563
CATTGAT	9.73026
CATTGCA	9.93855
CATTGCC	9.79416
CATTGCG	9.83816
CATTGCT	9.82052
CATTGGA	9.74164
CATTGGC	9.77685
CATTGGG	9.6247
CATTGGT	9.75097
CATTGTA	9.83692
CATTGTC	9.90101
CATTGTG	9.63469
CATTGTT	9.74269
CATTTAA	8.1526
CATTTAC	8.54835
CATTTAG	8.04447
CATTTAT	8.30301
CATTTCA	8.37605
CATTTCC	8.50232
CATTTCG	8.55052
CATTTCT	8.32319
CATTTGA	8.34005
CATTTGC	8.82983
CATTTGG	8.49358
CATTTGT	8.46567
CATTTTA	8.45332
CATTTTC	8.70237
CATTTTG	8.3872
CATTTTT	8.48976
CCATAAA	8.45796
CCATAAC	8.71065
CCATAAG	8.43556
CCATAAT	8.60418
CCATACA	8.55352
CCATACC	8.67988
CCATACG	8.7863
CCATACT	8.48569
CCATAGA	8.65394
CCATAGC	9.06838
CCATAGG	8.62773
CCATAGT	8.72207
CCATATA	8.70692
CCATATC	8.92689
CCATATG	8.54917
CCATATT	8.54196
CCATCAA	7.94279
CCATCAC	8.00636
CCATCAG	7.7473
CCATCAT	8.084
CCATCCA	7.88
CCATCCC	7.86661
CCATCCG	8.2849
CCATCCT	7.74909
CCATCGA	8.33621
CCATCGC	8.69029
CCATCGG	8.20176
CCATCGT	8.46148
CCATCTA	7.72141
CCATCTC	7.94947
CCATCTG	7.60321
CCATCTT	7.77098
CCATGAA	9.49794
CCATGAC	9.57905
CCATGAG	9.37559
CCATGAT	9.56228
CCATGCA	9.79129
CCATGCC	9.63546
CCATGCG	9.68805
CCATGCT	9.74798
CCATGGA	9.56698
CCATGGC	9.69535
CCATGGG	9.45808
CCATGGT	9.6221
CCATGTA	9.67027
CCATGTC	9.74967
CCATGTG	9.40727
CCATGTT	9.58626
CCATTAA	7.93723
CCATTAC	8.17943
CCATTAG	7.70774
CCATTAT	8.03992
CCATTCA	8.09415
CCATTCC	8.13194
CCATTCG	8.29089
CCATTCT	8.06094
CCATTGA	7.83198
CCATTGC	8.45945
CCATTGG	7.89453
CCATTGT	8.12226
CCATTTA	8.04789
CCATTTC	8.25678
CCATTTG	7.93441
CCATTTT	8.07778
CCCTAAA	8.45436
CCCTAAC	8.66197
CCCTAAG	8.18094
CCCTAAT	8.42967
CCCTACA	8.5461
CCCTACC	8.74866
CCCTACG	8.65027
CCCTACT	8.51196
CCCTAGA	8.50636
CCCTAGC	8.9361
CCCTAGG	8.37379
CCCTAGT	8.52321
CCCTATA	8.45432
CCCTATC	8.91614
CCCTATG	8.49706
CCCTATT	8.52442
CCCTCAA	7.96772
CCCTCAC	8.00507
CCCTCAG	7.85565
CCCTCAT	8.08298
CCCTCCA	7.80005
CCCTCCC	8.04575
CCCTCCG	8.14271
CCCTCCT	7.78721
CCCTCGA	8.21142
CCCTCGC	8.62989
CCCTCGG	8.02416
CCCTCGT	8.23919
CCCTCTA	7.72303
CCCTCTC	8.21982
CCCTCTG	7.80554
CCCTCTT	7.95498
CCCTGAA	9.27233
CCCTGAC	9.33012
CCCTGAG	9.17948
CCCTGAT	9.39812
CCCTGCA	9.60841
CCCTGCC	9.55446
CCCTGCG	9.62349
CCCTGCT	9.62925
CCCTGGA	9.30943
CCCTGGC	9.51637
CCCTGGG	9.20479
CCCTGGT	9.46936
CCCTGTA	9.44776
CCCTGTC	9.62778
CCCTGTG	9.17276
CCCTGTT	9.34239
CCCTTAA	7.89541
CCCTTAC	7.8702
CCCTTAG	7.69702
CCCTTAT	7.75066
CCCTTCA	8.14998
CCCTTCC	8.55939
CCCTTCG	8.34907
CCCTTCT	8.13169
CCCTTGA	7.83673
CCCTTGC	8.39234
CCCTTGG	7.85216
CCCTTGT	8.15003
CCCTTTA	7.96761
CCCTTTC	8.34216
CCCTTTG	7.91411
CCCTTTT	8.12512
CCGTAAA	8.61947
CCGTAAC	8.83106
CCGTAAG	8.55709
CCGTAAT	8.70106
CCGTACA	8.68751
CCGTACC	8.83094
CCGTACG	8.79717
CCGTACT	8.50966
CCGTAGA	8.79336
CCGTAGC	9.14454
CCGTAGG	8.64011
CCGTAGT	8.89349
CCGTATA	8.76648
CCGTATC	9.13711
CCGTATG	8.68234
CCGTATT	8.63823
CCGTCAA	8.03441
CCGTCAC	8.19466
CCGTCAG	7.9974
CCGTCAT	8.16869
CCGTCCA	7.83759
CCGTCCC	7.85735
CCGTCCG	7.97392
CCGTCCT	7.87583
CCGTCGA	8.35727
CCGTCGC	8.83586
CCGTCGG	8.34018
CCGTCGT	8.47372
CCGTCTA	8.00219
CCGTCTC	8.55197
CCGTCTG	7.89773
CCGTCTT	7.92986
CCGTGAA	9.61867
CCGTGAC	9.63348
CCGTGAG	9.47612
CCGTGAT	9.64105
CCGTGCA	9.86894
CCGTGCC	9.734
CCGTGCG	9.82094
CCGTGCT	9.80996
CCGTGGA	9.66431
CCGTGGC	9.74833
CCGTGGG	9.60515
CCGTGGT	9.75977
CCGTGTA	9.81219
CCGTGTC	9.90716
CCGTGTG	9.50344
CCGTGTT	9.67876
CCGTTAA	8.307
CCGTTAC	8.36144
CCGTTAG	7.81133
CCGTTAT	8.13271
CCGTTCA	8.25655
CCGTTCC	8.39861
CCGTTCG	8.38646
CCGTTCT	8.13289
CCGTTGA	8.09191
CCGTTGC	8.46057
CCGTTGG	8.13187
CCGTTGT	8.30634
CCGTTTA	8.24585
CCGTTTC	8.44386
CCGTTTG	8.17402
CCGTTTT	8.15309
CCTTAAA	8.75397
CCTTAAC	8.93895
CCTTAAG	8.57898
CCTTAAT	8.7447
CCTTACA	8.91159
CCTTACC	8.92439
CCTTACG	8.92339
CCTTACT	8.75229
CCTTAGA	8.91437
CCTTAGC	9.30577
CCTTAGG	8.84269
CCTTAGT	8.89854
CCTTATA	8.85399
CCTTATC	9.22722
CCTTATG	8.68472
CCTTATT	8.7391
CCTTCAA	8.38525
CCTTCAC	8.59369
CCTTCAG	8.19568
CCTTCAT	8.42396
CCTTCCA	8.19677
CCTTCCC	8.33722
CCTTCCG	8.45792
CCTTCCT	8.0258
CCTTCGA	8.51638
CCTTCGC	8.87335
CCTTCGG	8.53916
CCTTCGT	8.70285
CCTTCTA	8.05807
CCTTCTC	8.30683
CCTTCTG	7.99259
CCTTCTT	8.06315
CCTTGAA	9.53215
CCTTGAC	9.56476
CCTTGAG	9.39829
CCTTGAT	9.62208
CCTTGCA	9.8477
CCTTGCC	9.66834
CCTTGCG	9.73487
CCTTGCT	9.7438
CCTTGGA	9.59315
CCTTGGC	9.59105
CCTTGGG	9.44067
CCTTGGT	9.67514
CCTTGTA	9.69673
CCTTGTC	9.83469
CCTTGTG	9.47811
CCTTGTT	9.59882
CCTTTAA	7.64687
CCTTTAC	8.12161
CCTTTAG	7.58194
CCTTTAT	7.98857
CCTTTCA	8.18664
CCTTTCC	8.41421
CCTTTCG	8.40998
CCTTTCT	7.96673
CCTTTGA	8.00055
CCTTTGC	8.46341
CCTTTGG	8.01313
CCTTTGT	8.13684
CCTTTTA	8.04794
CCTTTTC	8.30673
CCTTTTG	8.00263
CCTTTTT	8.03293
CGATAAA	8.61951
CGATAAC	8.66106
CGATAAG	8.47372
CGATAAT	8.62341
CGATACA	8.74045
CGATACC	8.72943
CGATACG	8.7859
CGATACT	8.56883
CGATAGA	8.62615
CGATAGC	9.02094
CGATAGG	8.55357
CGATAGT	8.74471
CGATATA	8.67176
CGATATC	8.95364
CGATATG	8.65744
CGATATT	8.57634
CGATCAA	8.33825
CGATCAC	8.48198
CGATCAG	8.18231
CGATCAT	8.32753
CGATCCA	8.18497
CGATCCC	8.1068
CGATCCG	8.29995
CGATCCT	8.07515
CGATCGA	8.36981
CGATCGC	8.69389
CGATCGG	8.42089
CGATCGT	8.61553
CGATCTA	7.9985
CGATCTC	8.09528
CGATCTG	8.00179
CGATCTT	8.12331
CGATGAA	9.43422
CGATGAC	9.44663
CGATGAG	9.23922
CGATGAT	9.475
CGATGCA	9.66209
CGATGCC	9.40481
CGATGCG	9.57657
CGATGCT	9.55865
CGATGGA	9.44558
CGATGGC	9.56073
CGATGGG	9.26896
CGATGGT	9.52665
CGATGTA	9.539
CGATGTC	9.65928
CGATGTG	9.26889
CGATGTT	9.44777
CGATTAA	8.10448
CGATTAC	8.40398
CGATTAG	7.93778
CGATTAT	8.1422
CGATTCA	8.22171
CGATTCC	8.40081
CGATTCG	8.48477
CGATTCT	8.19228
CGATTGA	8.11705
CGATTGC	8.36824
CGATTGG	8.18514
CGATTGT	8.21166
CGATTTA	8.2775
CGATTTC	8.39713
CGATTTG	8.23379
CGATTTT	8.32951
CGCTAAA	8.81415
CGCTAAC	8.90111
CGCTAAG	8.58309
CGCTAAT	8.84972
CGCTACA	8.83991
CGCTACC	8.97147
CGCTACG	8.92845
CGCTACT	8.79672
CGCTAGA	8.80355
CGCTAGC	9.08945
CGCTAGG	8.73232
CGCTAGT	8.92628
CGCTATA	8.83045
CGCTATC	9.15105
CGCTATG	8.70669
CGCTATT	8.83992
CGCTCAA	8.47709
CGCTCAC	8.57724
CGCTCAG	8.26828
CGCTCAT	8.48555
CGCTCCA	8.35544
CGCTCCC	8.41741
CGCTCCG	8.42352
CGCTCCT	8.26644
CGCTCGA	8.60262
CGCTCGC	8.82628
CGCTCGG	8.36579
CGCTCGT	8.60404
CGCTCTA	8.32493
CGCTCTC	8.43369
CGCTCTG	8.20371
CGCTCTT	8.16359
CGCTGAA	9.5279
CGCTGAC	9.55959
CGCTGAG	9.35802
CGCTGAT	9.54363
CGCTGCA	9.82591
CGCTGCC	9.65044
CGCTGCG	9.71105
CGCTGCT	9.72596
CGCTGGA	9.5488
CGCTGGC	9.65375
CGCTGGG	9.38564
CGCTGGT	9.60829
CGCTGTA	9.67587
CGCTGTC	9.75064
CGCTGTG	9.4511
CGCTGTT	9.60489
CGCTTAA	8.30673
CGCTTAC	8.36358
CGCTTAG	8.00018
CGCTTAT	8.33687
CGCTTCA	8.38546
CGCTTCC	8.53535
CGCTTCG	8.52678
CGCTTCT	8.35151
CGCTTGA	8.26548
CGCTTGC	8.54308
CGCTTGG	8.15006
CGCTTGT	8.45351
CGCTTTA	8.3826
CGCTTTC	8.54605
CGCTTTG	8.29624
CGCTTTT	8.45118
CGGTAAA	8.69644
CGGTAAC	9.04657
CGGTAAG	8.56275
CGGTAAT	8.78255
CGGTACA	8.76876
CGGTACC	9.00104
CGGTACG	8.81276
CGGTACT	8.79716
CGGTAGA	8.99641
CGGTAGC	9.49411
CGGTAGG	8.85662
CGGTAGT	9.06277
CGGTATA	8.88209
CGGTATC	9.49347
CGGTATG	8.68876
CGGTATT	8.79507
CGGTCAA	8.01053
CGGTCAC	8.48628
CGGTCAG	8.00245
CGGTCAT	8.33416
CGGTCCA	8.1791
CGGTCCC	8.15636
CGGTCCG	8.25621
CGGTCCT	8.02707
CGGTCGA	8.74309
CGGTCGC	9.31338
CGGTCGG	8.47407
CGGTCGT	8.74561
CGGTCTA	8.42104
CGGTCTC	9.29815
CGGTCTG	8.07756
CGGTCTT	8.27616
CGGTGAA	9.87827
CGGTGAC	9.97376
CGGTGAG	9.8426
CGGTGAT	9.97061
CGGTGCA	10.1252
CGGTGCC	9.97585
CGGTGCG	10.0275
CGGTGCT	10.0261
CGGTGGA	9.94023
CGGTGGC	10.0759
CGGTGGG	9.8828
CGGTGGT	9.9979
CGGTGTA	9.98658
CGGTGTC	10.0984
CGGTGTG	9.94644
CGGTGTT	10.002
CGGTTAA	7.9622
CGGTTAC	8.23867
CGGTTAG	7.66705
CGGTTAT	8.1143
CGGTTCA	8.19941
CGGTTCC	8.3317
CGGTTCG	8.319
CGGTTCT	8.06863
CGGTTGA	8.06978
CGGTTGC	8.3894
CGGTTGG	7.97775
CGGTTGT	8.21273
CGGTTTA	7.9874
CGGTTTC	8.48844
CGGTTTG	7.97742
CGGTTTT	8.10285
CGTTAAA	8.79204
CGTTAAC	8.97068
CGTTAAG	8.6908
CGTTAAT	8.91927
CGTTACA	8.90095
CGTTACC	9.04115
CGTTACG	9.0045
CGTTACT	8.92226
CGTTAGA	8.98715
CGTTAGC	9.24789
CGTTAGG	8.8714
CGTTAGT	8.98923
CGTTATA	8.92182
CGTTATC	9.26276
CGTTATG	8.83153
CGTTATT	8.83514
CGTTCAA	8.63304
CGTTCAC	8.67347
CGTTCAG	8.45213
CGTTCAT	8.60776
CGTTCCA	8.4783
CGTTCCC	8.35184
CGTTCCG	8.61357
CGTTCCT	8.3542
CGTTCGA	8.8538
CGTTCGC	9.05665
CGTTCGG	8.8018
CGTTCGT	8.82976
CGTTCTA	8.3138
CGTTCTC	8.49178
CGTTCTG	8.363
CGTTCTT	8.30044
CGTTGAA	9.5076
CGTTGAC	9.60162
CGTTGAG	9.41971
CGTTGAT	9.59676
CGTTGCA	9.82192
CGTTGCC	9.66223
CGTTGCG	9.7258
CGTTGCT	9.70945
CGTTGGA	9.61043
CGTTGGC	9.58589
CGTTGGG	9.41181
CGTTGGT	9.63553
CGTTGTA	9.68506
CGTTGTC	9.73567
CGTTGTG	9.45377
CGTTGTT	9.57855
CGTTTAA	8.11031
CGTTTAC	8.40302
CGTTTAG	7.97802
CGTTTAT	8.30315
CGTTTCA	8.38386
CGTTTCC	8.5261
CGTTTCG	8.53859
CGTTTCT	8.32314
CGTTTGA	8.3391
CGTTTGC	8.64499
CGTTTGG	8.27104
CGTTTGT	8.47578
CGTTTTA	8.34978
CGTTTTC	8.42216
CGTTTTG	8.17386
CGTTTTT	8.34112
CTATAAA	8.23393
CTATAAC	8.5039
CTATAAG	8.2053
CTATAAT	8.45391
CTATACA	8.43846
CTATACC	8.57466
CTATACG	8.61185
CTATACT	8.23814
CTATAGA	8.65543
CTATAGC	9.01016
CTATAGG	8.5111
CTATAGT	8.5775
CTATATA	8.50164
CTATATC	8.89251
CTATATG	8.38862
CTATATT	8.43341
CTATCAA	7.46521
CTATCAC	7.99663
CTATCAG	7.49828
CTATCAT	7.79706
CTATCCA	7.33698
CTATCCC	7.21594
CTATCCG	8.11078
CTATCCT	7.15082
CTATCGA	8.09688
CTATCGC	8.50329
CTATCGG	8.10459
CTATCGT	8.12775
CTATCTA	6.99169
CTATCTC	7.54731
CTATCTG	7.28649
CTATCTT	7.41958
CTATGAA	9.50832
CTATGAC	9.55652
CTATGAG	9.27874
CTATGAT	9.57108
CTATGCA	9.78104
CTATGCC	9.56212
CTATGCG	9.60614
CTATGCT	9.68875
CTATGGA	9.52615
CTATGGC	9.64649
CTATGGG	9.31193
CTATGGT	9.58923
CTATGTA	9.60608
CTATGTC	9.72444
CTATGTG	9.32564
CTATGTT	9.49295
CTATTAA	7.68786
CTATTAC	7.87298
CTATTAG	7.00683
CTATTAT	7.5526
CTATTCA	7.49736
CTATTCC	8.06947
CTATTCG	8.11395
CTATTCT	7.49816
CTATTGA	7.58884
CTATTGC	8.12104
CTATTGG	7.46933
CTATTGT	7.76085
CTATTTA	7.58405
CTATTTC	7.98362
CTATTTG	7.48795
CTATTTT	7.55749
CTCTAAA	8.48014
CTCTAAC	8.69964
CTCTAAG	8.27199
CTCTAAT	8.48575
CTCTACA	8.5141
CTCTACC	8.73663
CTCTACG	8.6658
CTCTACT	8.46338
CTCTAGA	8.59493
CTCTAGC	8.92687
CTCTAGG	8.3782
CTCTAGT	8.67249
CTCTATA	8.6176
CTCTATC	9.02774
CTCTATG	8.4585
CTCTATT	8.63376
CTCTCAA	8.04327
CTCTCAC	8.17148
CTCTCAG	7.77987
CTCTCAT	7.96717
CTCTCCA	8.04045
CTCTCCC	8.14415
CTCTCCG	8.28702
CTCTCCT	7.85623
CTCTCGA	8.19773
CTCTCGC	8.58223
CTCTCGG	8.11025
CTCTCGT	8.33643
CTCTCTA	7.7787
CTCTCTC	7.80964
CTCTCTG	7.71764
CTCTCTT	7.81496
CTCTGAA	9.42852
CTCTGAC	9.48244
CTCTGAG	9.2618
CTCTGAT	9.49715
CTCTGCA	9.74492
CTCTGCC	9.61716
CTCTGCG	9.65972
CTCTGCT	9.68666
CTCTGGA	9.43679
CTCTGGC	9.52754
CTCTGGG	9.26642
CTCTGGT	9.5194
CTCTGTA	9.54265
CTCTGTC	9.67544
CTCTGTG	9.36137
CTCTGTT	9.49508
CTCTTAA	7.68619
CTCTTAC	7.98118
CTCTTAG	7.58262
CTCTTAT	7.90544
CTCTTCA	7.91148
CTCTTCC	8.24309
CTCTTCG	8.30988
CTCTTCT	7.67867
CTCTTGA	7.84646
CTCTTGC	8.27803
CTCTTGG	7.74906
CTCTTGT	8.05222
CTCTTTA	8.07429
CTCTTTC	8.28805
CTCTTTG	7.839
CTCTTTT	7.74303
CTGTAAA	8.6177
CTGTAAC	8.90406
CTGTAAG	8.36814
CTGTAAT	8.68398
CTGTACA	8.6136
CTGTACC	8.85568
CTGTACG	8.74024
CTGTACT	8.62782
CTGTAGA	8.95132
CTGTAGC	9.43463
CTGTAGG	8.79402
CTGTAGT	8.96378
CTGTATA	8.70038
CTGTATC	9.25643
CTGTATG	8.59033
CTGTATT	8.65959
CTGTCAA	7.83362
CTGTCAC	8.24319
CTGTCAG	7.81893
CTGTCAT	8.03086
CTGTCCA	7.53488
CTGTCCC	7.61768
CTGTCCG	8.14566
CTGTCCT	7.4251
CTGTCGA	8.37308
CTGTCGC	9.04009
CTGTCGG	8.45113
CTGTCGT	8.35866
CTGTCTA	7.74079
CTGTCTC	8.80901
CTGTCTG	7.37972
CTGTCTT	7.9488
CTGTGAA	9.86707
CTGTGAC	9.90867
CTGTGAG	9.72543
CTGTGAT	9.89565
CTGTGCA	10.0781
CTGTGCC	10.0096
CTGTGCG	9.95106
CTGTGCT	10.0406
CTGTGGA	9.86407
CTGTGGC	10.0448
CTGTGGG	9.86188
CTGTGGT	9.96524
CTGTGTA	9.97731
CTGTGTC	10.0738
CTGTGTG	9.78189
CTGTGTT	9.96134
CTGTTAA	7.65478
CTGTTAC	7.91423
CTGTTAG	7.3473
CTGTTAT	7.59185
CTGTTCA	7.8285
CTGTTCC	8.23543
CTGTTCG	8.19457
CTGTTCT	7.76941
CTGTTGA	7.67141
CTGTTGC	8.4947
CTGTTGG	7.88407
CTGTTGT	8.09984
CTGTTTA	7.63193
CTGTTTC	8.2698
CTGTTTG	7.76526
CTGTTTT	7.80436
CTTTAAA	8.69817
CTTTAAC	8.8696
CTTTAAG	8.48145
CTTTAAT	8.80706
CTTTACA	8.70608
CTTTACC	8.86568
CTTTACG	8.85877
CTTTACT	8.68162
CTTTAGA	8.78966
CTTTAGC	9.1481
CTTTAGG	8.81426
CTTTAGT	8.93581
CTTTATA	8.70271
CTTTATC	9.07574
CTTTATG	8.63349
[truncated: 2,097 more rows]

## Sheet: binding_NNNTNNNN_raw
Name	Low_635scan	High_635scan	MASLINER_adj	Flags	Sequence	Norm
TDG_TG_f1ACA_f2GGAT_rep_10	27265	56436	53877	0	CGCAGCTCACATGGATCTCGCGGAAGCGAGATCCGTGTGAGCTGCGACACTCTTTCCCTA	29524
TDG_TG_f1GAA_f2GAGG_rep_10	25638	44242	44242	0	CGCAGCTCGAATGAGGCTCGCGGAAGCGAGCCTCGTTCGAGCTGCGACACTCTTTCCCTA	23539.5
TDG_random_15b_10_rep_7	15629	32001	32001	0	CGCGCACACAAATCTACACGCGGAAGCGTGTAGATTTGTGTGCGCGACACTCTTTCCCTA	16938.8
TDG_TG_f1AAG_f2TAGG_rep_8	13057	21037	21037	0	CGCAGCTCAAGTTAGGCTCGCGGAAGCGAGCCTAGCTTGAGCTGCGACACTCTTTCCCTA	11034.3
TDG_TG_f1GCA_f2CAAT_rep_3	16149	29498	29498	0	CGCAGCTCGCATCAATCTCGCGGAAGCGAGATTGGTGCGAGCTGCGACACTCTTTCCCTA	15508.1
TDG_TG_f1ACA_f2GTTG_rep_5	26190	54138	51782	0	CGCAGCTCACATGTTGCTCGCGGAAGCGAGCAACGTGTGAGCTGCGACACTCTTTCCCTA	27359
TDG_TG_f1GAC_f2AAGA_rep_5	17450	30498	30498	0	CGCAGCTCGACTAAGACTCGCGGAAGCGAGTCTTGGTCGAGCTGCGACACTCTTTCCCTA	16205
TDG_TG_f1ACG_f2AACG_rep_2	20167	39209	39209	0	CGCAGCTCACGTAACGCTCGCGGAAGCGAGCGTTGCGTGAGCTGCGACACTCTTTCCCTA	20941.3
TDG_TG_f1ATT_f2TTAC_rep_4	15159	30227	30227	0	CGCAGCTCATTTTTACCTCGCGGAAGCGAGGTAAGAATGAGCTGCGACACTCTTTCCCTA	16029.2
TDG_TG_f1AGG_f2CCCA_rep_4	15098	28466	28466	0	CGCAGCTCAGGTCCCACTCGCGGAAGCGAGTGGGGCCTGAGCTGCGACACTCTTTCCCTA	15182.5
TDG_TG_f1TTT_f2GCGC_rep_10	26367	48930	48930	0	CGCAGCTCTTTTGCGCCTCGCGGAAGCGAGGCGCGAAAGAGCTGCGACACTCTTTCCCTA	26432.2
TDG_TG_f1TAG_f2TGTA_rep_4	14266	26612	26612	0	CGCAGCTCTAGTTGTACTCGCGGAAGCGAGTACAGCTAGAGCTGCGACACTCTTTCCCTA	14621.5
TDG_TG_f1TGG_f2GCCG_rep_2	34091	57608	67179	0	CGCAGCTCTGGTGCCGCTCGCGGAAGCGAGCGGCGCCAGAGCTGCGACACTCTTTCCCTA	36927.7
TDG_TG_f1TCG_f2ACAA_rep_3	16871	29844	29844	0	CGCAGCTCTCGTACAACTCGCGGAAGCGAGTTGTGCGAGAGCTGCGACACTCTTTCCCTA	16397.3
TDG_TG_f1ACC_f2CACC_rep_10	15131	31647	31647	0	CGCAGCTCACCTCACCCTCGCGGAAGCGAGGGTGGGGTGAGCTGCGACACTCTTTCCCTA	17448
TDG_TG_f1GTA_f2TACA_rep_7	14374	22682	22682	0	CGCAGCTCGTATTACACTCGCGGAAGCGAGTGTAGTACGAGCTGCGACACTCTTTCCCTA	12737.9
TDG_TG_f1GAG_f2AAAA_rep_10	15754	25226	25226	0	CGCAGCTCGAGTAAAACTCGCGGAAGCGAGTTTTGCTCGAGCTGCGACACTCTTTCCCTA	14323.2
TDG_TG_f1TCT_f2TACG_rep_3	14018	26774	26774	0	CGCAGCTCTCTTTACGCTCGCGGAAGCGAGCGTAGAGAGAGCTGCGACACTCTTTCCCTA	15248.5
TDG_TG_f1TTG_f2CCCG_rep_1	15792	25635	25635	0	CGCAGCTCTTGTCCCGCTCGCGGAAGCGAGCGGGGCAAGAGCTGCGACACTCTTTCCCTA	14678.8
TDG_TG_f1GGA_f2GGAG_rep_3	20253	41549	41549	0	CGCAGCTCGGATGGAGCTCGCGGAAGCGAGCTCCGTCCGAGCTGCGACACTCTTTCCCTA	23855.2
TDG_TG_f1TGG_f2TTGT_rep_1	11546	23075	23075	0	CGCAGCTCTGGTTTGTCTCGCGGAAGCGAGACAAGCCAGAGCTGCGACACTCTTTCCCTA	13304.1
TDG_TG_f1CGC_f2TTTT_rep_5	14138	24631	24631	0	CGCAGCTCCGCTTTTTCTCGCGGAAGCGAGAAAAGGCGGAGCTGCGACACTCTTTCCCTA	14197.6
TDG_TG_f1GGC_f2CGCC_rep_10	15184	29245	29245	0	CGCAGCTCGGCTCGCCCTCGCGGAAGCGAGGGCGGGCCGAGCTGCGACACTCTTTCCCTA	17092.9
TDG_TG_f1GCC_f2TCTC_rep_6	14546	27004	27004	0	CGCAGCTCGCCTTCTCCTCGCGGAAGCGAGGAGAGGGCGAGCTGCGACACTCTTTCCCTA	15845.2
TDG_TG_f1GTC_f2TGGT_rep_9	14085	25887	25887	0	CGCAGCTCGTCTTGGTCTCGCGGAAGCGAGACCAGGACGAGCTGCGACACTCTTTCCCTA	15131.8
TDG_TG_f1CTT_f2AAGT_rep_8	14004	24483	24483	0	CGCAGCTCCTTTAAGTCTCGCGGAAGCGAGACTTGAAGGAGCTGCGACACTCTTTCCCTA	14367.4
TDG_TG_f1AAA_f2AAGA_rep_9	13522	26323	26323	0	CGCAGCTCAAATAAGACTCGCGGAAGCGAGTCTTGTTTGAGCTGCGACACTCTTTCCCTA	15521.1
TDG_TG_f1AAA_f2CGGC_rep_1	12852	25270	25270	0	CGCAGCTCAAATCGGCCTCGCGGAAGCGAGGCCGGTTTGAGCTGCGACACTCTTTCCCTA	15146.1
TDG_TG_f1TTT_f2CAGC_rep_7	12607	27008	27008	0	CGCAGCTCTTTTCAGCCTCGCGGAAGCGAGGCTGGAAAGAGCTGCGACACTCTTTCCCTA	16397.7
TDG_TG_f1TCT_f2GATG_rep_9	19408	39610	39610	0	CGCAGCTCTCTTGATGCTCGCGGAAGCGAGCATCGAGAGAGCTGCGACACTCTTTCCCTA	24131.3
TDG_TG_f1CGG_f2AAAG_rep_5	13027	24475	24475	0	CGCAGCTCCGGTAAAGCTCGCGGAAGCGAGCTTTGCCGGAGCTGCGACACTCTTTCCCTA	14859.9
TDG_TG_f1CAT_f2AGCG_rep_6	16725	35579	35579	0	CGCAGCTCCATTAGCGCTCGCGGAAGCGAGCGCTGATGGAGCTGCGACACTCTTTCCCTA	21619.7
TDG_TG_f1CCG_f2CCCG_rep_2	11019	20825	20825	0	CGCAGCTCCCGTCCCGCTCGCGGAAGCGAGCGGGGCGGGAGCTGCGACACTCTTTCCCTA	12817.1
TDG_TG_f1TGG_f2CCAG_rep_1	10503	18465	18465	0	CGCAGCTCTGGTCCAGCTCGCGGAAGCGAGCTGGGCCAGAGCTGCGACACTCTTTCCCTA	11456.9
dBr_1358	11037	22918	22918	0	CGCTGAAGGGTCTACAGCCGCGGAAGCGGCTGTAGACCCTTCAGCGACACTCTTTCCCTA	14229.7
TDG_TG_f1CTA_f2GGTG_rep_4	18563	37355	37355	0	CGCAGCTCCTATGGTGCTCGCGGAAGCGAGCACCGTAGGAGCTGCGACACTCTTTCCCTA	23471.3
TDG_TG_f1TCA_f2TCCG_rep_8	12513	23389	23389	0	CGCAGCTCTCATTCCGCTCGCGGAAGCGAGCGGAGTGAGAGCTGCGACACTCTTTCCCTA	14897.6
TDG_TG_f1GAC_f2CGTT_rep_3	13099	26411	26411	0	CGCAGCTCGACTCGTTCTCGCGGAAGCGAGAACGGGTCGAGCTGCGACACTCTTTCCCTA	16895.9
TDG_random_loop_GGCT_rep_10	17784	32026	32026	0	CGCAGCTCGGCTATTACTCGCGGCTGCGAGTAATAGCCGAGCTGCGACACTCTTTCCCTA	20489.6
TDG_TG_f1GAG_f2AACT_rep_2	14325	26196	26196	0	CGCAGCTCGAGTAACTCTCGCGGAAGCGAGAGTTGCTCGAGCTGCGACACTCTTTCCCTA	16654
TDG_TG_f1GCA_f2CTGA_rep_2	11442	24040	24040	0	CGCAGCTCGCATCTGACTCGCGGAAGCGAGTCAGGTGCGAGCTGCGACACTCTTTCCCTA	15147.7
TDG_TG_f1TAC_f2ATGA_rep_7	12853	23740	23740	0	CGCAGCTCTACTATGACTCGCGGAAGCGAGTCATGGTAGAGCTGCGACACTCTTTCCCTA	14905
TDG_TG_f1TTC_f2TAGG_rep_4	10448	20517	20517	0	CGCAGCTCTTCTTAGGCTCGCGGAAGCGAGCCTAGGAAGAGCTGCGACACTCTTTCCCTA	12639.6
TDG_TG_f1CCT_f2TTCT_rep_1	11283	23851	23851	0	CGCAGCTCCCTTTTCTCTCGCGGAAGCGAGAGAAGAGGGAGCTGCGACACTCTTTCCCTA	14570.5
TDG_TG_f1TTC_f2CTCA_rep_1	13485	26569	26569	0	CGCAGCTCTTCTCTCACTCGCGGAAGCGAGTGAGGGAAGAGCTGCGACACTCTTTCCCTA	16294.8
TDG_TG_f1AGG_f2TGAC_rep_2	13473	22952	22952	0	CGCAGCTCAGGTTGACCTCGCGGAAGCGAGGTCAGCCTGAGCTGCGACACTCTTTCCCTA	14067.8
TDG_TG_f1GGA_f2GCCT_rep_9	20261	38428	38428	0	CGCAGCTCGGATGCCTCTCGCGGAAGCGAGAGGCGTCCGAGCTGCGACACTCTTTCCCTA	23460.4
TDG_TG_f1GCG_f2ACGT_rep_3	18282	33248	33248	0	CGCAGCTCGCGTACGTCTCGCGGAAGCGAGACGTGCGCGAGCTGCGACACTCTTTCCCTA	20298
TDG_TG_f1CTG_f2ATGC_rep_4	17465	30571	30571	0	CGCAGCTCCTGTATGCCTCGCGGAAGCGAGGCATGCAGGAGCTGCGACACTCTTTCCCTA	18613.5
TDG_TG_f1TGC_f2GTCC_rep_6	26827	51681	53023	0	CGCAGCTCTGCTGTCCCTCGCGGAAGCGAGGGACGGCAGAGCTGCGACACTCTTTCCCTA	32200.7
TDG_TG_f1GTA_f2TACA_rep_6	13836	26844	26844	0	CGCAGCTCGTATTACACTCGCGGAAGCGAGTGTAGTACGAGCTGCGACACTCTTTCCCTA	16055.3
TDG_TG_f1TAG_f2TATA_rep_7	13739	24613	24613	0	CGCAGCTCTAGTTATACTCGCGGAAGCGAGTATAGCTAGAGCTGCGACACTCTTTCCCTA	14419.3
TDG_TG_f1GTA_f2GGCC_rep_9	23789	50958	47103	0	CGCAGCTCGTATGGCCCTCGCGGAAGCGAGGGCCGTACGAGCTGCGACACTCTTTCCCTA	27594.9
TDG_TG_f1GAG_f2CCGA_rep_10	15684	29278	29278	0	CGCAGCTCGAGTCCGACTCGCGGAAGCGAGTCGGGCTCGAGCTGCGACACTCTTTCCCTA	17145.2
TDG_TG_f1GAG_f2CTAC_rep_9	16745	31678	31678	0	CGCAGCTCGAGTCTACCTCGCGGAAGCGAGGTAGGCTCGAGCTGCGACACTCTTTCCCTA	18438.2
TDG_TG_f1ATA_f2ATGT_rep_3	13327	27773	27773	0	CGCAGCTCATATATGTCTCGCGGAAGCGAGACATGTATGAGCTGCGACACTCTTTCCCTA	16243.1
TDG_TG_f1GCT_f2CAAC_rep_3	17115	33591	33591	0	CGCAGCTCGCTTCAACCTCGCGGAAGCGAGGTTGGAGCGAGCTGCGACACTCTTTCCCTA	19670.8
TDG_TG_f1TCG_f2CTTC_rep_8	12772	25675	25675	0	CGCAGCTCTCGTCTTCCTCGCGGAAGCGAGGAAGGCGAGAGCTGCGACACTCTTTCCCTA	15206.6
TDG_TG_f1GGA_f2AGCA_rep_8	21161	43909	43909	0	CGCAGCTCGGATAGCACTCGCGGAAGCGAGTGCTGTCCGAGCTGCGACACTCTTTCCCTA	25830.5
TDG_TG_f1AAG_f2GCTG_rep_9	30903	57945	60966	0	CGCAGCTCAAGTGCTGCTCGCGGAAGCGAGCAGCGCTTGAGCTGCGACACTCTTTCCCTA	35485.2
TDG_TG_f1GAT_f2CTGC_rep_8	14926	27975	27975	0	CGCAGCTCGATTCTGCCTCGCGGAAGCGAGGCAGGATCGAGCTGCGACACTCTTTCCCTA	16282.5
TDG_TG_f1ACT_f2GGTT_rep_3	25989	54860	51390	0	CGCAGCTCACTTGGTTCTCGCGGAAGCGAGAACCGAGTGAGCTGCGACACTCTTTCCCTA	30106.4
TDG_TG_f1TAA_f2AACA_rep_1	13516	30081	30081	0	CGCAGCTCTAATAACACTCGCGGAAGCGAGTGTTGTTAGAGCTGCGACACTCTTTCCCTA	17472.1
TDG_TG_f1TCA_f2GGAG_rep_6	21288	36154	36154	0	CGCAGCTCTCATGGAGCTCGCGGAAGCGAGCTCCGTGAGAGCTGCGACACTCTTTCCCTA	20873.3
TDG_TG_f1CCT_f2ACAC_rep_7	17309	37122	37122	0	CGCAGCTCCCTTACACCTCGCGGAAGCGAGGTGTGAGGGAGCTGCGACACTCTTTCCCTA	21359.6
TDG_TG_f1TGT_f2TAGC_rep_1	13314	23833	23833	0	CGCAGCTCTGTTTAGCCTCGCGGAAGCGAGGCTAGACAGAGCTGCGACACTCTTTCCCTA	13670.2
TDG_TG_f1GCA_f2CTCT_rep_9	14816	29685	29685	0	CGCAGCTCGCATCTCTCTCGCGGAAGCGAGAGAGGTGCGAGCTGCGACACTCTTTCCCTA	16975.8
TDG_TG_f1TCG_f2GGCG_rep_4	23970	51359	47455	0	CGCAGCTCTCGTGGCGCTCGCGGAAGCGAGCGCCGCGAGAGCTGCGACACTCTTTCCCTA	26756.2
TDG_TG_f1ACG_f2CAAA_rep_6	13540	22678	22678	0	CGCAGCTCACGTCAAACTCGCGGAAGCGAGTTTGGCGTGAGCTGCGACACTCTTTCCCTA	12579.2
TDG_TG_f1GAT_f2GAGT_rep_9	22848	44415	44415	0	CGCAGCTCGATTGAGTCTCGCGGAAGCGAGACTCGATCGAGCTGCGACACTCTTTCCCTA	24520
TDG_TG_f1GAC_f2GCGC_rep_4	25653	51142	50735	0	CGCAGCTCGACTGCGCCTCGCGGAAGCGAGGCGCGGTCGAGCTGCGACACTCTTTCCCTA	27633.4
TDG_TG_f1GCT_f2GTTC_rep_9	23918	47058	47058	0	CGCAGCTCGCTTGTTCCTCGCGGAAGCGAGGAACGAGCGAGCTGCGACACTCTTTCCCTA	24833
TDG_TG_f1ATA_f2CCTT_rep_2	11395	24058	24058	0	CGCAGCTCATATCCTTCTCGCGGAAGCGAGAAGGGTATGAGCTGCGACACTCTTTCCCTA	12518.4
TDG_TG_f1CAC_f2CGAT_rep_6	14909	32459	32459	0	CGCAGCTCCACTCGATCTCGCGGAAGCGAGATCGGGTGGAGCTGCGACACTCTTTCCCTA	16889.8
TDG_TG_f1GCT_f2TAGC_rep_5	14104	24939	24939	0	CGCAGCTCGCTTTAGCCTCGCGGAAGCGAGGCTAGAGCGAGCTGCGACACTCTTTCCCTA	12986.4
dBr_7761	14037	28108	28108	0	CGCCTGTTTAGAACCTAGCGCGGAAGCGCTAGGTTCTAAACAGGCGACACTCTTTCCCTA	14648.7
TDG_TG_f1ACT_f2GGTG_rep_2	27291	58230	53927	0	CGCAGCTCACTTGGTGCTCGCGGAAGCGAGCACCGAGTGAGCTGCGACACTCTTTCCCTA	28101.8
TDG_TG_f1CCC_f2GGCG_rep_8	26576	51010	52534	0	CGCAGCTCCCCTGGCGCTCGCGGAAGCGAGCGCCGGGGGAGCTGCGACACTCTTTCCCTA	27474.9
TDG_TG_f1AAG_f2TAAT_rep_10	13018	25191	25191	0	CGCAGCTCAAGTTAATCTCGCGGAAGCGAGATTAGCTTGAGCTGCGACACTCTTTCCCTA	13158.3
dBr_6606	18823	38028	38028	0	CGCGACTGACATTCCGCCCGCGGAAGCGGGCGGAATGTCAGTCGCGACACTCTTTCCCTA	19836.2
TDG_TG_f1TTG_f2GACT_rep_8	26515	50035	52415	0	CGCAGCTCTTGTGACTCTCGCGGAAGCGAGAGTCGCAAGAGCTGCGACACTCTTTCCCTA	27446.9
TDG_TG_f1TAA_f2GGCC_rep_7	22835	42642	42642	0	CGCAGCTCTAATGGCCCTCGCGGAAGCGAGGGCCGTTAGAGCTGCGACACTCTTTCCCTA	22567.1
TDG_TG_f1ACG_f2TATC_rep_2	13860	28765	28765	0	CGCAGCTCACGTTATCCTCGCGGAAGCGAGGATAGCGTGAGCTGCGACACTCTTTCCCTA	15190.2
TDG_TG_f1GCA_f2GTTG_rep_4	26634	45170	45170	0	CGCAGCTCGCATGTTGCTCGCGGAAGCGAGCAACGTGCGAGCTGCGACACTCTTTCCCTA	24282.2
TDG_TG_f1ATA_f2TGTT_rep_8	12653	26732	26732	0	CGCAGCTCATATTGTTCTCGCGGAAGCGAGAACAGTATGAGCTGCGACACTCTTTCCCTA	14546.9
TDG_TG_f1TGC_f2GTTA_rep_2	24343	53481	48182	0	CGCAGCTCTGCTGTTACTCGCGGAAGCGAGTAACGGCAGAGCTGCGACACTCTTTCCCTA	26603.1
TDG_TG_f1GGC_f2ATTC_rep_2	17414	30605	30605	0	CGCAGCTCGGCTATTCCTCGCGGAAGCGAGGAATGGCCGAGCTGCGACACTCTTTCCCTA	16948.8
TDG_TG_f1AAC_f2TCAA_rep_6	14857	27776	27776	0	CGCAGCTCAACTTCAACTCGCGGAAGCGAGTTGAGGTTGAGCTGCGACACTCTTTCCCTA	15445
TDG_TG_f1CAA_f2GTTG_rep_7	22439	44315	44315	0	CGCAGCTCCAATGTTGCTCGCGGAAGCGAGCAACGTTGGAGCTGCGACACTCTTTCCCTA	25014
TDG_TG_f1CAT_f2GGCA_rep_5	25907	50582	51230	0	CGCAGCTCCATTGGCACTCGCGGAAGCGAGTGCCGATGGAGCTGCGACACTCTTTCCCTA	29140.8
TDG_TG_f1TAT_f2TCAC_rep_9	14289	29021	29021	0	CGCAGCTCTATTTCACCTCGCGGAAGCGAGGTGAGATAGAGCTGCGACACTCTTTCCCTA	16459.9
TDG_TG_f1GCC_f2GGCA_rep_9	21527	47559	47559	0	CGCAGCTCGCCTGGCACTCGCGGAAGCGAGTGCCGGGCGAGCTGCGACACTCTTTCCCTA	27064.4
TDG_TG_f1CCG_f2CGGA_rep_1	14844	26083	26083	0	CGCAGCTCCCGTCGGACTCGCGGAAGCGAGTCCGGCGGGAGCTGCGACACTCTTTCCCTA	14942.6
TDG_TG_f1TCT_f2TTCA_rep_2	13752	29620	29620	0	CGCAGCTCTCTTTTCACTCGCGGAAGCGAGTGAAGAGAGAGCTGCGACACTCTTTCCCTA	17037.3
TDG_TG_f1GGT_f2GATG_rep_7	20722	46130	46130	0	CGCAGCTCGGTTGATGCTCGCGGAAGCGAGCATCGACCGAGCTGCGACACTCTTTCCCTA	26562.5
TDG_TG_f1CCC_f2ACGG_rep_2	17270	35558	35558	0	CGCAGCTCCCCTACGGCTCGCGGAAGCGAGCCGTGGGGGAGCTGCGACACTCTTTCCCTA	20387.6
TDG_TG_f1ATT_f2ACGA_rep_9	15382	31566	31566	0	CGCAGCTCATTTACGACTCGCGGAAGCGAGTCGTGAATGAGCTGCGACACTCTTTCCCTA	18176.3
TDG_TG_f1GCC_f2AGGA_rep_4	17580	34453	34453	0	CGCAGCTCGCCTAGGACTCGCGGAAGCGAGTCCTGGGCGAGCTGCGACACTCTTTCCCTA	19838.7
TDG_TG_f1AGA_f2GACA_rep_10	23645	46646	46646	0	CGCAGCTCAGATGACACTCGCGGAAGCGAGTGTCGTCTGAGCTGCGACACTCTTTCCCTA	27033.6
TDG_TG_f1GCC_f2CGCG_rep_8	17214	33577	33577	0	CGCAGCTCGCCTCGCGCTCGCGGAAGCGAGCGCGGGGCGAGCTGCGACACTCTTTCCCTA	19459.5
TDG_TG_f1AGC_f2TCAT_rep_5	15027	26131	26131	0	CGCAGCTCAGCTTCATCTCGCGGAAGCGAGATGAGGCTGAGCTGCGACACTCTTTCCCTA	15226.7
TDG_TG_f1CGA_f2ATCG_rep_4	20192	38496	38496	0	CGCAGCTCCGATATCGCTCGCGGAAGCGAGCGATGTCGGAGCTGCGACACTCTTTCCCTA	22118
TDG_TG_f1ATC_f2CTAT_rep_7	13004	27419	27419	0	CGCAGCTCATCTCTATCTCGCGGAAGCGAGATAGGGATGAGCTGCGACACTCTTTCCCTA	15521.8
TDG_TG_f1GAA_f2TGTT_rep_7	13319	24979	24979	0	CGCAGCTCGAATTGTTCTCGCGGAAGCGAGAACAGTTCGAGCTGCGACACTCTTTCCCTA	13986.8
TDG_TG_f1GGC_f2ACCA_rep_8	16706	35849	35849	0	CGCAGCTCGGCTACCACTCGCGGAAGCGAGTGGTGGCCGAGCTGCGACACTCTTTCCCTA	20260.9
TDG_TG_f1TCG_f2CAGG_rep_9	13028	26008	26008	0	CGCAGCTCTCGTCAGGCTCGCGGAAGCGAGCCTGGCGAGAGCTGCGACACTCTTTCCCTA	14699
dBr_3711	17029	30074	30074	0	CGCTACTGACTCGTCGTCCGCGGAAGCGGACGACGAGTCAGTAGCGACACTCTTTCCCTA	16893.9
TDG_TG_f1CTC_f2GCCT_rep_10	21327	42949	42949	0	CGCAGCTCCTCTGCCTCTCGCGGAAGCGAGAGGCGGAGGAGCTGCGACACTCTTTCCCTA	24126.4
TDG_TG_f1TCG_f2ACCT_rep_6	15276	29830	29830	0	CGCAGCTCTCGTACCTCTCGCGGAAGCGAGAGGTGCGAGAGCTGCGACACTCTTTCCCTA	16756.9
TDG_TG_f1CAG_f2AGGG_rep_3	19279	35254	35254	0	CGCAGCTCCAGTAGGGCTCGCGGAAGCGAGCCCTGCTGGAGCTGCGACACTCTTTCCCTA	19867.8
TDG_TG_f1TTA_f2TGCG_rep_5	15739	30629	30629	0	CGCAGCTCTTATTGCGCTCGCGGAAGCGAGCGCAGTAAGAGCTGCGACACTCTTTCCCTA	17414.3
TDG_TG_f1AAG_f2AGCG_rep_2	22485	40641	40641	0	CGCAGCTCAAGTAGCGCTCGCGGAAGCGAGCGCTGCTTGAGCTGCGACACTCTTTCCCTA	23096.7
TDG_TG_f1ATT_f2AAAT_rep_7	15234	24701	24701	0	CGCAGCTCATTTAAATCTCGCGGAAGCGAGATTTGAATGAGCTGCGACACTCTTTCCCTA	13988.7
TDG_TG_f1AGA_f2TTTG_rep_1	11809	24691	24691	0	CGCAGCTCAGATTTTGCTCGCGGAAGCGAGCAAAGTCTGAGCTGCGACACTCTTTCCCTA	13968.8
TDG_TG_f1ACT_f2TACC_rep_5	11557	23123	23123	0	CGCAGCTCACTTTACCCTCGCGGAAGCGAGGGTAGAGTGAGCTGCGACACTCTTTCCCTA	12921.8
dBr_1934	14523	22059	22059	0	CGCACCAATTACATGACACGCGGAAGCGTGTCATGTAATTGGTGCGACACTCTTTCCCTA	12301.1
TDG_TG_f1GGT_f2TTGC_rep_2	11043	24581	24581	0	CGCAGCTCGGTTTTGCCTCGCGGAAGCGAGGCAAGACCGAGCTGCGACACTCTTTCCCTA	14093.5
TDG_TG_f1CCG_f2TACG_rep_6	11977	22313	22313	0	CGCAGCTCCCGTTACGCTCGCGGAAGCGAGCGTAGCGGGAGCTGCGACACTCTTTCCCTA	13215.8
TDG_TG_f1CGA_f2TAAG_rep_9	11565	19405	19405	0	CGCAGCTCCGATTAAGCTCGCGGAAGCGAGCTTAGTCGGAGCTGCGACACTCTTTCCCTA	11501
TDG_TG_f1ATA_f2GAGG_rep_8	19306	41128	41128	0	CGCAGCTCATATGAGGCTCGCGGAAGCGAGCCTCGTATGAGCTGCGACACTCTTTCCCTA	24417.6
TDG_TG_f1GCA_f2TATT_rep_5	10567	17750	17750	0	CGCAGCTCGCATTATTCTCGCGGAAGCGAGAATAGTGCGAGCTGCGACACTCTTTCCCTA	10696
TDG_TG_f1TCC_f2TCGG_rep_7	10318	17004	17004	0	CGCAGCTCTCCTTCGGCTCGCGGAAGCGAGCCGAGGGAGAGCTGCGACACTCTTTCCCTA	10561.9
TDG_TG_f1AAA_f2CCGG_rep_9	10172	21198	21198	0	CGCAGCTCAAATCCGGCTCGCGGAAGCGAGCCGGGTTTGAGCTGCGACACTCTTTCCCTA	13350.5
TDG_TG_f1ACA_f2GAGT_rep_5	15907	28114	28114	0	CGCAGCTCACATGAGTCTCGCGGAAGCGAGACTCGTGTGAGCTGCGACACTCTTTCCCTA	18247.7
TDG_TG_f1TGA_f2CAGC_rep_9	9713	14200	14200	0	CGCAGCTCTGATCAGCCTCGCGGAAGCGAGGCTGGTCAGAGCTGCGACACTCTTTCCCTA	9502.45
TDG_TG_f1AGA_f2TATA_rep_5	10709	19812	19812	0	CGCAGCTCAGATTATACTCGCGGAAGCGAGTATAGTCTGAGCTGCGACACTCTTTCCCTA	13324.8
TDG_TG_f1TAA_f2CGAC_rep_4	8070	17583	17583	0	CGCAGCTCTAATCGACCTCGCGGAAGCGAGGTCGGTTAGAGCTGCGACACTCTTTCCCTA	12027.2
TDG_TG_f1ATA_f2TCCT_rep_1	8478	14259	14259	0	CGCAGCTCATATTCCTCTCGCGGAAGCGAGAGGAGTATGAGCTGCGACACTCTTTCCCTA	10020.5
TDG_TG_f1AAC_f2TCTG_rep_7	8428	17745	17745	0	CGCAGCTCAACTTCTGCTCGCGGAAGCGAGCAGAGGTTGAGCTGCGACACTCTTTCCCTA	12775.3
TDG_TG_f1ATA_f2TCTG_rep_2	7547	16746	16746	0	CGCAGCTCATATTCTGCTCGCGGAAGCGAGCAGAGTATGAGCTGCGACACTCTTTCCCTA	12275.2
TDG_TG_f1GTG_f2GCTG_rep_4	21196	38011	38011	0	CGCAGCTCGTGTGCTGCTCGCGGAAGCGAGCAGCGCACGAGCTGCGACACTCTTTCCCTA	28049.3
TDG_TG_f1GAT_f2TTGC_rep_7	9624	18119	18119	0	CGCAGCTCGATTTTGCCTCGCGGAAGCGAGGCAAGATCGAGCTGCGACACTCTTTCCCTA	13506.5
TDG_TG_f1AAG_f2AGCG_rep_7	15943	29298	29298	0	CGCAGCTCAAGTAGCGCTCGCGGAAGCGAGCGCTGCTTGAGCTGCGACACTCTTTCCCTA	22279.9
TDG_TG_f1GCC_f2TTCG_rep_7	9160	19248	19248	0	CGCAGCTCGCCTTTCGCTCGCGGAAGCGAGCGAAGGGCGAGCTGCGACACTCTTTCCCTA	14756.8
TDG_TG_f1TGG_f2GCAA_rep_6	19667	38838	38838	0	CGCAGCTCTGGTGCAACTCGCGGAAGCGAGTTGCGCCAGAGCTGCGACACTCTTTCCCTA	30092.1
TDG_TG_f1TTT_f2CAGA_rep_8	7398	14996	14996	0	CGCAGCTCTTTTCAGACTCGCGGAAGCGAGTCTGGAAAGAGCTGCGACACTCTTTCCCTA	11852.5
TDG_TG_f1GTC_f2GAGC_rep_1	10754	24190	24190	0	CGCAGCTCGTCTGAGCCTCGCGGAAGCGAGGCTCGGACGAGCTGCGACACTCTTTCCCTA	19509.2
dBr_6191	7908	16937	16937	0	CGCCCGATACCGTGGACTCGCGGAAGCGAGTCCACGGTATCGGGCGACACTCTTTCCCTA	13991.6
TDG_TG_f1CAC_f2CATT_rep_8	7161	15678	15678	0	CGCAGCTCCACTCATTCTCGCGGAAGCGAGAATGGGTGGAGCTGCGACACTCTTTCCCTA	13438.5
TDG_TG_f1TCT_f2GGGT_rep_7	9936	19420	19420	0	CGCAGCTCTCTTGGGTCTCGCGGAAGCGAGACCCGAGAGAGCTGCGACACTCTTTCCCTA	16819.9
TDG_TG_f1AAC_f2AGCA_rep_2	8587	17635	17635	0	CGCAGCTCAACTAGCACTCGCGGAAGCGAGTGCTGGTTGAGCTGCGACACTCTTTCCCTA	15430.3
dBr_5077	8245	17254	17254	0	CGCTAGGCGCTGCGTGGACGCGGAAGCGTCCACGCAGCGCCTAGCGACACTCTTTCCCTA	15146.5
TDG_TG_f1GTT_f2AACT_rep_7	7795	15597	15597	0	CGCAGCTCGTTTAACTCTCGCGGAAGCGAGAGTTGAACGAGCTGCGACACTCTTTCCCTA	13885.5
TDG_TG_f1CCA_f2AACC_rep_9	8495	15384	15384	0	CGCAGCTCCCATAACCCTCGCGGAAGCGAGGGTTGTGGGAGCTGCGACACTCTTTCCCTA	13784.7
TDG_TG_f1TTT_f2CTCA_rep_10	6494	12120	12120	0	CGCAGCTCTTTTCTCACTCGCGGAAGCGAGTGAGGAAAGAGCTGCGACACTCTTTCCCTA	10978.1
TDG_TG_f1ATG_f2TTGG_rep_9	6127	13002	13002	0	CGCAGCTCATGTTTGGCTCGCGGAAGCGAGCCAAGCATGAGCTGCGACACTCTTTCCCTA	12097.4
TDG_TG_f1GTC_f2TAGG_rep_7	6236	12897	12897	0	CGCAGCTCGTCTTAGGCTCGCGGAAGCGAGCCTAGGACGAGCTGCGACACTCTTTCCCTA	12048.5
TDG_TG_f1TGC_f2CTGA_rep_8	5319	11402	11402	0	CGCAGCTCTGCTCTGACTCGCGGAAGCGAGTCAGGGCAGAGCTGCGACACTCTTTCCCTA	10690
TDG_TG_f1AGC_f2AAAG_rep_4	7231	15391	15391	0	CGCAGCTCAGCTAAAGCTCGCGGAAGCGAGCTTTGGCTGAGCTGCGACACTCTTTCCCTA	14507.2
TDG_TG_f1GCG_f2GGGT_rep_2	10691	21369	21369	0	CGCAGCTCGCGTGGGTCTCGCGGAAGCGAGACCCGCGCGAGCTGCGACACTCTTTCCCTA	20513.3
TDG_TG_f1AAG_f2TTAA_rep_10	5675	12649	12649	0	CGCAGCTCAAGTTTAACTCGCGGAAGCGAGTTAAGCTTGAGCTGCGACACTCTTTCCCTA	12263.7
TDG_TG_f1AAC_f2CAAA_rep_3	5911	13390	13390	0	CGCAGCTCAACTCAAACTCGCGGAAGCGAGTTTGGGTTGAGCTGCGACACTCTTTCCCTA	13030.4
TDG_TG_f1GAG_f2ATTT_rep_10	7958	17305	17305	0	CGCAGCTCGAGTATTTCTCGCGGAAGCGAGAAATGCTCGAGCTGCGACACTCTTTCCCTA	16830.2
TDG_TG_f1GAC_f2TAAC_rep_3	6505	13880	13880	0	CGCAGCTCGACTTAACCTCGCGGAAGCGAGGTTAGGTCGAGCTGCGACACTCTTTCCCTA	13430.4
TDG_TG_f1TTT_f2GTCT_rep_6	12048	24558	24558	0	CGCAGCTCTTTTGTCTCTCGCGGAAGCGAGAGACGAAAGAGCTGCGACACTCTTTCCCTA	23200.5
TDG_TG_f1TGC_f2ATTG_rep_9	8359	16146	16146	0	CGCAGCTCTGCTATTGCTCGCGGAAGCGAGCAATGGCAGAGCTGCGACACTCTTTCCCTA	15248
dBr_3595	8021	17565	17565	0	CGCTACAATGGATACAAACGCGGAAGCGTTTGTATCCATTGTAGCGACACTCTTTCCCTA	16600.1
TDG_TG_f1AGT_f2CTAT_rep_5	6327	13194	13194	0	CGCAGCTCAGTTCTATCTCGCGGAAGCGAGATAGGACTGAGCTGCGACACTCTTTCCCTA	12575.5
TDG_TG_f1TAC_f2GTTG_rep_3	12614	29764	29764	0	CGCAGCTCTACTGTTGCTCGCGGAAGCGAGCAACGGTAGAGCTGCGACACTCTTTCCCTA	28422.9
dBr_4039	8891	16534	16534	0	CGCCCAAACGACTGCTGGCGCGGAAGCGCCAGCAGTCGTTTGGGCGACACTCTTTCCCTA	15614.4
TDG_TG_f1TGC_f2GCGA_rep_2	13474	25729	25729	0	CGCAGCTCTGCTGCGACTCGCGGAAGCGAGTCGCGGCAGAGCTGCGACACTCTTTCCCTA	23980.9
TDG_TG_f1ACT_f2CATG_rep_10	8212	15446	15446	0	CGCAGCTCACTTCATGCTCGCGGAAGCGAGCATGGAGTGAGCTGCGACACTCTTTCCCTA	14392.6
TDG_TG_f1CCT_f2AGTT_rep_9	8495	21435	21435	0	CGCAGCTCCCTTAGTTCTCGCGGAAGCGAGAACTGAGGGAGCTGCGACACTCTTTCCCTA	19969.9
TDG_TG_f1GGG_f2CCCT_rep_6	6645	14467	14467	0	CGCAGCTCGGGTCCCTCTCGCGGAAGCGAGAGGGGCCCGAGCTGCGACACTCTTTCCCTA	13473.4
TDG_TG_f1ATG_f2ATCA_rep_9	13096	29169	29169	0	CGCAGCTCATGTATCACTCGCGGAAGCGAGTGATGCATGAGCTGCGACACTCTTTCCCTA	26928
TDG_TG_f1CTT_f2TTGC_rep_4	8111	16221	16221	0	CGCAGCTCCTTTTTGCCTCGCGGAAGCGAGGCAAGAAGGAGCTGCGACACTCTTTCCCTA	14731.9
TDG_TG_f1TCA_f2TGCC_rep_7	7831	15848	15848	0	CGCAGCTCTCATTGCCCTCGCGGAAGCGAGGGCAGTGAGAGCTGCGACACTCTTTCCCTA	14223.3
TDG_TG_f1ACA_f2GTCT_rep_9	17000	35126	35126	0	CGCAGCTCACATGTCTCTCGCGGAAGCGAGAGACGTGTGAGCTGCGACACTCTTTCCCTA	31255.2
TDG_TG_f1TCC_f2TGCG_rep_9	8955	20043	20043	0	CGCAGCTCTCCTTGCGCTCGCGGAAGCGAGCGCAGGGAGAGCTGCGACACTCTTTCCCTA	17886.7
TDG_TG_f1GGA_f2TCCT_rep_5	7241	15690	15690	0	CGCAGCTCGGATTCCTCTCGCGGAAGCGAGAGGAGTCCGAGCTGCGACACTCTTTCCCTA	13940.6
TDG_TG_f1AGT_f2GGTT_rep_1	14731	27535	27535	0	CGCAGCTCAGTTGGTTCTCGCGGAAGCGAGAACCGACTGAGCTGCGACACTCTTTCCCTA	24237.4
TDG_TG_f1AGA_f2CCAG_rep_9	8006	16180	16180	0	CGCAGCTCAGATCCAGCTCGCGGAAGCGAGCTGGGTCTGAGCTGCGACACTCTTTCCCTA	14098.8
TDG_TG_f1GTA_f2CCCA_rep_7	8646	14387	14387	0	CGCAGCTCGTATCCCACTCGCGGAAGCGAGTGGGGTACGAGCTGCGACACTCTTTCCCTA	12352.2
TDG_TG_f1ACG_f2GGTC_rep_10	18675	40363	40363	0	CGCAGCTCACGTGGTCCTCGCGGAAGCGAGGACCGCGTGAGCTGCGACACTCTTTCCCTA	34348
TDG_TG_f1CAT_f2TCGG_rep_1	10142	20496	20496	0	CGCAGCTCCATTTCGGCTCGCGGAAGCGAGCCGAGATGGAGCTGCGACACTCTTTCCCTA	17031.5
TDG_TG_f1GCG_f2CAGG_rep_2	10111	16744	16744	0	CGCAGCTCGCGTCAGGCTCGCGGAAGCGAGCCTGGCGCGAGCTGCGACACTCTTTCCCTA	13800.7
TDG_TG_f1ATC_f2GGCG_rep_3	18535	39081	39081	0	CGCAGCTCATCTGGCGCTCGCGGAAGCGAGCGCCGGATGAGCTGCGACACTCTTTCCCTA	31596.8
TDG_TG_f1GCG_f2TAGA_rep_9	8963	19491	19491	0	CGCAGCTCGCGTTAGACTCGCGGAAGCGAGTCTAGCGCGAGCTGCGACACTCTTTCCCTA	15643.8
TDG_TG_f1CAG_f2CCAT_rep_1	9582	17357	17357	0	CGCAGCTCCAGTCCATCTCGCGGAAGCGAGATGGGCTGGAGCTGCGACACTCTTTCCCTA	13776.2
TDG_TG_f1ATA_f2ACTG_rep_7	9340	19331	19331	0	CGCAGCTCATATACTGCTCGCGGAAGCGAGCAGTGTATGAGCTGCGACACTCTTTCCCTA	14945.8
TDG_TG_f1GCA_f2AGCC_rep_2	11261	24715	24715	0	CGCAGCTCGCATAGCCCTCGCGGAAGCGAGGGCTGTGCGAGCTGCGACACTCTTTCCCTA	19085
TDG_TG_f1GAT_f2GGAC_rep_5	18279	30365	30365	0	CGCAGCTCGATTGGACCTCGCGGAAGCGAGGTCCGATCGAGCTGCGACACTCTTTCCCTA	22677.9
TDG_TG_f1TCG_f2AGCT_rep_10	10666	22121	22121	0	CGCAGCTCTCGTAGCTCTCGCGGAAGCGAGAGCTGCGAGAGCTGCGACACTCTTTCCCTA	16389.1
TDG_TG_f1AGT_f2CTAT_rep_10	8209	17484	17484	0	CGCAGCTCAGTTCTATCTCGCGGAAGCGAGATAGGACTGAGCTGCGACACTCTTTCCCTA	12891.3
TDG_TG_f1CGT_f2CATG_rep_7	11142	19365	19365	0	CGCAGCTCCGTTCATGCTCGCGGAAGCGAGCATGGACGGAGCTGCGACACTCTTTCCCTA	14234
TDG_TG_f1CAC_f2ATGA_rep_5	9294	21538	21538	0	CGCAGCTCCACTATGACTCGCGGAAGCGAGTCATGGTGGAGCTGCGACACTCTTTCCCTA	15470
TDG_TG_f1TTT_f2CGGT_rep_5	12418	21955	21955	0	CGCAGCTCTTTTCGGTCTCGCGGAAGCGAGACCGGAAAGAGCTGCGACACTCTTTCCCTA	15592.9
TDG_TG_f1GCA_f2GCGT_rep_7	18738	38501	38501	0	CGCAGCTCGCATGCGTCTCGCGGAAGCGAGACGCGTGCGAGCTGCGACACTCTTTCCCTA	27299.7
TDG_TG_f1CGG_f2CGTG_rep_8	12308	23046	23046	0	CGCAGCTCCGGTCGTGCTCGCGGAAGCGAGCACGGCCGGAGCTGCGACACTCTTTCCCTA	16274.6
TDG_TG_f1CGA_f2ACGT_rep_3	13297	21345	21345	0	CGCAGCTCCGATACGTCTCGCGGAAGCGAGACGTGTCGGAGCTGCGACACTCTTTCCCTA	14984
TDG_TG_f1GAT_f2AATA_rep_7	12548	28624	28624	0	CGCAGCTCGATTAATACTCGCGGAAGCGAGTATTGATCGAGCTGCGACACTCTTTCCCTA	20254.9
TDG_TG_f1CGG_f2ATCC_rep_9	17588	37246	37246	0	CGCAGCTCCGGTATCCCTCGCGGAAGCGAGGGATGCCGGAGCTGCGACACTCTTTCCCTA	26121.1
TDG_TG_f1ATG_f2TTCT_rep_9	10450	18832	18832	0	CGCAGCTCATGTTTCTCTCGCGGAAGCGAGAGAAGCATGAGCTGCGACACTCTTTCCCTA	13353.1
TDG_TG_f1CGC_f2CGAA_rep_9	11719	24762	24762	0	CGCAGCTCCGCTCGAACTCGCGGAAGCGAGTTCGGGCGGAGCTGCGACACTCTTTCCCTA	17557.9
TDG_TG_f1CGA_f2GATC_rep_9	20127	32362	32362	0	CGCAGCTCCGATGATCCTCGCGGAAGCGAGGATCGTCGGAGCTGCGACACTCTTTCCCTA	23101
TDG_TG_f1TCT_f2CATG_rep_10	12024	22912	22912	0	CGCAGCTCTCTTCATGCTCGCGGAAGCGAGCATGGAGAGAGCTGCGACACTCTTTCCCTA	16347.7
TDG_TG_f1CTG_f2CTGC_rep_5	9775	20032	20032	0	CGCAGCTCCTGTCTGCCTCGCGGAAGCGAGGCAGGCAGGAGCTGCGACACTCTTTCCCTA	14299.4
TDG_TG_f1ATG_f2ACCC_rep_10	14195	24684	24684	0	CGCAGCTCATGTACCCCTCGCGGAAGCGAGGGGTGCATGAGCTGCGACACTCTTTCCCTA	17852.6
TDG_TG_f1GTT_f2CCGA_rep_6	12243	24514	24514	0	CGCAGCTCGTTTCCGACTCGCGGAAGCGAGTCGGGAACGAGCTGCGACACTCTTTCCCTA	17917.6
TDG_TG_f1TAT_f2CCCA_rep_3	8827	19453	19453	0	CGCAGCTCTATTCCCACTCGCGGAAGCGAGTGGGGATAGAGCTGCGACACTCTTTCCCTA	14502.2
TDG_TG_f1TTC_f2CCGC_rep_3	11353	23501	23501	0	CGCAGCTCTTCTCCGCCTCGCGGAAGCGAGGCGGGGAAGAGCTGCGACACTCTTTCCCTA	17743.7
TDG_TG_f1TTA_f2GGGA_rep_4	16330	34593	34593	0	CGCAGCTCTTATGGGACTCGCGGAAGCGAGTCCCGTAAGAGCTGCGACACTCTTTCCCTA	26072.6
TDG_TG_f1TCT_f2ACTT_rep_4	9674	20579	20579	0	CGCAGCTCTCTTACTTCTCGCGGAAGCGAGAAGTGAGAGAGCTGCGACACTCTTTCCCTA	15541.7
TDG_TG_f1TTT_f2AGCT_rep_5	14664	24394	24394	0	CGCAGCTCTTTTAGCTCTCGCGGAAGCGAGAGCTGAAAGAGCTGCGACACTCTTTCCCTA	18443.3
TDG_TG_f1TCC_f2GGTA_rep_1	19181	40446	40446	0	CGCAGCTCTCCTGGTACTCGCGGAAGCGAGTACCGGGAGAGCTGCGACACTCTTTCCCTA	30467.1
TDG_TG_f1ATC_f2GATC_rep_3	19670	40995	40995	0	CGCAGCTCATCTGATCCTCGCGGAAGCGAGGATCGGATGAGCTGCGACACTCTTTCCCTA	31228.1
TDG_TG_f1GTC_f2AGTC_rep_3	12493	21386	21386	0	CGCAGCTCGTCTAGTCCTCGCGGAAGCGAGGACTGGACGAGCTGCGACACTCTTTCCCTA	16118.2
TDG_TG_f1GGA_f2TCTC_rep_6	9437	21817	21817	0	CGCAGCTCGGATTCTCCTCGCGGAAGCGAGGAGAGTCCGAGCTGCGACACTCTTTCCCTA	16436.5
TDG_TG_f1ACC_f2GAGA_rep_1	14739	38293	38293	0	CGCAGCTCACCTGAGACTCGCGGAAGCGAGTCTCGGGTGAGCTGCGACACTCTTTCCCTA	28840.2
TDG_TG_f1CAC_f2TAAG_rep_4	10810	18242	18242	0	CGCAGCTCCACTTAAGCTCGCGGAAGCGAGCTTAGGTGGAGCTGCGACACTCTTTCCCTA	13667.4
TDG_TG_f1ATG_f2AGGT_rep_4	13666	29019	29019	0	CGCAGCTCATGTAGGTCTCGCGGAAGCGAGACCTGCATGAGCTGCGACACTCTTTCCCTA	21163.5
TDG_TG_f1TCC_f2ACCC_rep_4	12914	25423	25423	0	CGCAGCTCTCCTACCCCTCGCGGAAGCGAGGGGTGGGAGAGCTGCGACACTCTTTCCCTA	18195.1
TDG_TG_f1TAT_f2AAGC_rep_1	13224	25422	25422	0	CGCAGCTCTATTAAGCCTCGCGGAAGCGAGGCTTGATAGAGCTGCGACACTCTTTCCCTA	17708.2
TDG_TG_f1TAC_f2CGCT_rep_3	11837	26892	26892	0	CGCAGCTCTACTCGCTCTCGCGGAAGCGAGAGCGGGTAGAGCTGCGACACTCTTTCCCTA	18415.2
TDG_TG_f1AAA_f2GAGA_rep_9	14980	32311	32311	0	CGCAGCTCAAATGAGACTCGCGGAAGCGAGTCTCGTTTGAGCTGCGACACTCTTTCCCTA	21602.1
TDG_TG_f1TAT_f2TATT_rep_7	9795	17667	17667	0	CGCAGCTCTATTTATTCTCGCGGAAGCGAGAATAGATAGAGCTGCGACACTCTTTCCCTA	11520
TDG_TG_f1ATC_f2CTGA_rep_8	9729	21577	21577	0	CGCAGCTCATCTCTGACTCGCGGAAGCGAGTCAGGGATGAGCTGCGACACTCTTTCCCTA	13796.5
TDG_TG_f1AGT_f2GAAA_rep_5	19023	38890	38890	0	CGCAGCTCAGTTGAAACTCGCGGAAGCGAGTTTCGACTGAGCTGCGACACTCTTTCCCTA	24849.7
TDG_TG_f1CCC_f2TCCT_rep_2	14633	26783	26783	0	CGCAGCTCCCCTTCCTCTCGCGGAAGCGAGAGGAGGGGGAGCTGCGACACTCTTTCCCTA	16996.7
TDG_TG_f1GCG_f2GTCC_rep_10	24501	52428	48490	0	CGCAGCTCGCGTGTCCCTCGCGGAAGCGAGGGACGCGCGAGCTGCGACACTCTTTCCCTA	30772.1
TDG_TG_f1AGT_f2GCAT_rep_4	22902	47855	47855	0	CGCAGCTCAGTTGCATCTCGCGGAAGCGAGATGCGACTGAGCTGCGACACTCTTTCCCTA	30213.5
TDG_TG_f1TAT_f2ACGG_rep_1	17193	29510	29510	0	CGCAGCTCTATTACGGCTCGCGGAAGCGAGCCGTGATAGAGCTGCGACACTCTTTCCCTA	18486.7
TDG_TG_f1GTA_f2AAGC_rep_1	13920	29522	29522	0	CGCAGCTCGTATAAGCCTCGCGGAAGCGAGGCTTGTACGAGCTGCGACACTCTTTCCCTA	18478.9
TDG_TG_f1TGT_f2TTCC_rep_8	12747	26078	26078	0	CGCAGCTCTGTTTTCCCTCGCGGAAGCGAGGGAAGACAGAGCTGCGACACTCTTTCCCTA	16209.5
TDG_TG_f1AAA_f2TGAA_rep_1	12709	23355	23355	0	CGCAGCTCAAATTGAACTCGCGGAAGCGAGTTCAGTTTGAGCTGCGACACTCTTTCCCTA	14247
TDG_TG_f1ATC_f2CAAG_rep_1	13048	25350	25350	0	CGCAGCTCATCTCAAGCTCGCGGAAGCGAGCTTGGGATGAGCTGCGACACTCTTTCCCTA	15610.2
TDG_TG_f1GAT_f2AGGT_rep_8	16894	32231	32231	0	CGCAGCTCGATTAGGTCTCGCGGAAGCGAGACCTGATCGAGCTGCGACACTCTTTCCCTA	19880.6
TDG_TG_f1TAT_f2GCAA_rep_4	26099	48255	48255	0	CGCAGCTCTATTGCAACTCGCGGAAGCGAGTTGCGATAGAGCTGCGACACTCTTTCCCTA	30179.6
TDG_TG_f1CAA_f2CTTG_rep_5	12032	23246	23246	0	CGCAGCTCCAATCTTGCTCGCGGAAGCGAGCAAGGTTGGAGCTGCGACACTCTTTCCCTA	14456.8
TDG_TG_f1TGT_f2CACA_rep_3	12990	24047	24047	0	CGCAGCTCTGTTCACACTCGCGGAAGCGAGTGTGGACAGAGCTGCGACACTCTTTCCCTA	15052.7
TDG_TG_f1ATC_f2TCTT_rep_8	11656	21450	21450	0	CGCAGCTCATCTTCTTCTCGCGGAAGCGAGAAGAGGATGAGCTGCGACACTCTTTCCCTA	13655.9
TDG_random_8b_5_rep_10	14099	25840	25840	0	CGCAGCTCCCCCCGTCCTCGCGGAAGCGAGGACGGGGGGAGCTGCGACACTCTTTCCCTA	16377.2
TDG_TG_f1CGG_f2CCCT_rep_2	12408	24599	24599	0	CGCAGCTCCGGTCCCTCTCGCGGAAGCGAGAGGGGCCGGAGCTGCGACACTCTTTCCCTA	15590.6
dBr_2299	13129	22490	22490	0	CGCAGAAAGGCTCCCATACGCGGAAGCGTATGGGAGCCTTTCTGCGACACTCTTTCCCTA	14349.5
TDG_TG_f1AGG_f2CGGG_rep_6	13387	28290	28290	0	CGCAGCTCAGGTCGGGCTCGCGGAAGCGAGCCCGGCCTGAGCTGCGACACTCTTTCCCTA	18105.5
TDG_TG_f1GGA_f2TAAG_rep_4	11321	21978	21978	0	CGCAGCTCGGATTAAGCTCGCGGAAGCGAGCTTAGTCCGAGCTGCGACACTCTTTCCCTA	14180.1
TDG_TG_f1AAA_f2AACA_rep_4	12932	26356	26356	0	CGCAGCTCAAATAACACTCGCGGAAGCGAGTGTTGTTTGAGCTGCGACACTCTTTCCCTA	17035.1
TDG_TG_f1ACA_f2CAGG_rep_9	10842	19511	19511	0	CGCAGCTCACATCAGGCTCGCGGAAGCGAGCCTGGTGTGAGCTGCGACACTCTTTCCCTA	12784.4
TDG_TG_f1CTC_f2GCGC_rep_1	18848	39123	39123	0	CGCAGCTCCTCTGCGCCTCGCGGAAGCGAGGCGCGGAGGAGCTGCGACACTCTTTCCCTA	25532.2
TDG_TG_f1TGG_f2GGTC_rep_9	24523	50772	48533	0	CGCAGCTCTGGTGGTCCTCGCGGAAGCGAGGACCGCCAGAGCTGCGACACTCTTTCCCTA	31673.3
TDG_TG_f1GTA_f2TCCT_rep_2	12093	23028	23028	0	CGCAGCTCGTATTCCTCTCGCGGAAGCGAGAGGAGTACGAGCTGCGACACTCTTTCCCTA	15086
TDG_TG_f1GAC_f2CGTG_rep_10	12372	25565	25565	0	CGCAGCTCGACTCGTGCTCGCGGAAGCGAGCACGGGTCGAGCTGCGACACTCTTTCCCTA	16636.5
TDG_TG_f1ATC_f2AGTC_rep_3	14178	27962	27962	0	CGCAGCTCATCTAGTCCTCGCGGAAGCGAGGACTGGATGAGCTGCGACACTCTTTCCCTA	18038.2
TDG_TG_f1GCG_f2TCGG_rep_6	13360	26412	26412	0	CGCAGCTCGCGTTCGGCTCGCGGAAGCGAGCCGAGCGCGAGCTGCGACACTCTTTCCCTA	17034.4
TDG_TG_f1ACA_f2GCCC_rep_10	22067	40274	40274	0	CGCAGCTCACATGCCCCTCGCGGAAGCGAGGGGCGTGTGAGCTGCGACACTCTTTCCCTA	25756.8
TDG_TG_f1GCC_f2GGCT_rep_2	15600	34863	34863	0	CGCAGCTCGCCTGGCTCTCGCGGAAGCGAGAGCCGGGCGAGCTGCGACACTCTTTCCCTA	22296.2
TDG_TG_f1AAA_f2GGAA_rep_2	15814	28444	28444	0	CGCAGCTCAAATGGAACTCGCGGAAGCGAGTTCCGTTTGAGCTGCGACACTCTTTCCCTA	18191
dBr_2981	10836	22443	22443	0	CGCCGGTCGGAACTCTCGCGCGGAAGCGCGAGAGTTCCGACCGGCGACACTCTTTCCCTA	13911.9
TDG_TG_f1ACA_f2GATT_rep_8	19014	34801	34801	0	CGCAGCTCACATGATTCTCGCGGAAGCGAGAATCGTGTGAGCTGCGACACTCTTTCCCTA	21706.5
TDG_TG_f1GTG_f2ACAA_rep_9	12879	23334	23334	0	CGCAGCTCGTGTACAACTCGCGGAAGCGAGTTGTGCACGAGCTGCGACACTCTTTCCCTA	14336.6
TDG_TG_f1AAC_f2TAGG_rep_3	9975	18977	18977	0	CGCAGCTCAACTTAGGCTCGCGGAAGCGAGCCTAGGTTGAGCTGCGACACTCTTTCCCTA	11648.5
TDG_TG_f1TCC_f2TGCT_rep_9	10881	20036	20036	0	CGCAGCTCTCCTTGCTCTCGCGGAAGCGAGAGCAGGGAGAGCTGCGACACTCTTTCCCTA	12139.2
TDG_TG_f1TGG_f2CCGG_rep_5	10582	21728	21728	0	CGCAGCTCTGGTCCGGCTCGCGGAAGCGAGCCGGGCCAGAGCTGCGACACTCTTTCCCTA	13337.1
TDG_TG_f1ACG_f2CCCC_rep_9	11746	21476	21476	0	CGCAGCTCACGTCCCCCTCGCGGAAGCGAGGGGGGCGTGAGCTGCGACACTCTTTCCCTA	13195
TDG_TG_f1TAA_f2CATG_rep_8	10012	20505	20505	0	CGCAGCTCTAATCATGCTCGCGGAAGCGAGCATGGTTAGAGCTGCGACACTCTTTCCCTA	12598.4
TDG_TG_f1GCT_f2AGGG_rep_1	13456	26597	26597	0	CGCAGCTCGCTTAGGGCTCGCGGAAGCGAGCCCTGAGCGAGCTGCGACACTCTTTCCCTA	16491.7
TDG_TG_f1CAG_f2CCTT_rep_2	10302	19928	19928	0	CGCAGCTCCAGTCCTTCTCGCGGAAGCGAGAAGGGCTGGAGCTGCGACACTCTTTCCCTA	12520.5
TDG_TG_f1AGT_f2ATGC_rep_10	11589	24386	24386	0	CGCAGCTCAGTTATGCCTCGCGGAAGCGAGGCATGACTGAGCTGCGACACTCTTTCCCTA	15569.7
TDG_TG_f1GTA_f2AGCT_rep_10	12384	24475	24475	0	CGCAGCTCGTATAGCTCTCGCGGAAGCGAGAGCTGTACGAGCTGCGACACTCTTTCCCTA	15781.5
dBr_1657	11689	24399	24399	0	CGCTGGGATTTGACCATCCGCGGAAGCGGATGGTCAAATCCCAGCGACACTCTTTCCCTA	15923.4
TDG_TG_f1CGA_f2CGCC_rep_3	11990	25447	25447	0	CGCAGCTCCGATCGCCCTCGCGGAAGCGAGGGCGGTCGGAGCTGCGACACTCTTTCCCTA	16893.8
TDG_TG_f1ACC_f2CTGC_rep_7	10505	20207	20207	0	CGCAGCTCACCTCTGCCTCGCGGAAGCGAGGCAGGGGTGAGCTGCGACACTCTTTCCCTA	13612.6
TDG_TG_f1CTC_f2CGGG_rep_8	10543	20482	20482	0	CGCAGCTCCTCTCGGGCTCGCGGAAGCGAGCCCGGGAGGAGCTGCGACACTCTTTCCCTA	13797.8
TDG_TG_f1CGG_f2GGTC_rep_6	23926	42377	42377	0	CGCAGCTCCGGTGGTCCTCGCGGAAGCGAGGACCGCCGGAGCTGCGACACTCTTTCCCTA	28793.4
TDG_TG_f1TTC_f2CCCC_rep_6	12272	23915	23915	0	CGCAGCTCTTCTCCCCCTCGCGGAAGCGAGGGGGGGAAGAGCTGCGACACTCTTTCCCTA	16325.9
TDG_TG_f1TCT_f2TCTT_rep_3	8753	18350	18350	0	CGCAGCTCTCTTTCTTCTCGCGGAAGCGAGAAGAGAGAGAGCTGCGACACTCTTTCCCTA	12599.8
TDG_TG_f1TCT_f2TCGT_rep_5	10047	19911	19911	0	CGCAGCTCTCTTTCGTCTCGCGGAAGCGAGACGAGAGAGAGCTGCGACACTCTTTCCCTA	13668.9
TDG_TG_f1CTC_f2TCTG_rep_10	10279	19869	19869	0	CGCAGCTCCTCTTCTGCTCGCGGAAGCGAGCAGAGGAGGAGCTGCGACACTCTTTCCCTA	13563.9
TDG_TG_f1TCG_f2AAGT_rep_6	10346	21302	21302	0	CGCAGCTCTCGTAAGTCTCGCGGAAGCGAGACTTGCGAGAGCTGCGACACTCTTTCCCTA	14542.1
TDG_TG_f1TAC_f2GTAT_rep_5	18956	35739	35739	0	CGCAGCTCTACTGTATCTCGCGGAAGCGAGATACGGTAGAGCTGCGACACTCTTTCCCTA	24369.4
TDG_TG_f1TCA_f2AGTC_rep_5	12095	21185	21185	0	CGCAGCTCTCATAGTCCTCGCGGAAGCGAGGACTGTGAGAGCTGCGACACTCTTTCCCTA	14283.8
dBr_4169	10531	22042	22042	0	CGCTAAGTATTATCAGATCGCGGAAGCGATCTGATAATACTTAGCGACACTCTTTCCCTA	14861.7
TDG_TG_f1TTA_f2ACGA_rep_2	11957	22206	22206	0	CGCAGCTCTTATACGACTCGCGGAAGCGAGTCGTGTAAGAGCTGCGACACTCTTTCCCTA	14959.2
TDG_TG_f1AGC_f2GCCC_rep_9	17869	33564	33564	0	CGCAGCTCAGCTGCCCCTCGCGGAAGCGAGGGGCGGCTGAGCTGCGACACTCTTTCCCTA	22539.1
TDG_TG_f1GTT_f2AACC_rep_1	12992	25696	25696	0	CGCAGCTCGTTTAACCCTCGCGGAAGCGAGGGTTGAACGAGCTGCGACACTCTTTCCCTA	17182.2
TDG_TG_f1AGG_f2CCGG_rep_1	11478	19672	19672	0	CGCAGCTCAGGTCCGGCTCGCGGAAGCGAGCCGGGCCTGAGCTGCGACACTCTTTCCCTA	12990.6
TDG_TG_f1CTT_f2CCCT_rep_3	10700	20484	20484	0	CGCAGCTCCTTTCCCTCTCGCGGAAGCGAGAGGGGAAGGAGCTGCGACACTCTTTCCCTA	13414
TDG_TG_f1CGA_f2ATTA_rep_7	12585	24964	24964	0	CGCAGCTCCGATATTACTCGCGGAAGCGAGTAATGTCGGAGCTGCGACACTCTTTCCCTA	16540.8
TDG_TG_f1GCT_f2CCCC_rep_7	12781	23653	23653	0	CGCAGCTCGCTTCCCCCTCGCGGAAGCGAGGGGGGAGCGAGCTGCGACACTCTTTCCCTA	15757.2
TDG_TG_f1GTA_f2CAAC_rep_4	11382	23755	23755	0	CGCAGCTCGTATCAACCTCGCGGAAGCGAGGTTGGTACGAGCTGCGACACTCTTTCCCTA	15884.3
TDG_TG_f1CGT_f2GGAT_rep_6	19172	41549	41549	0	CGCAGCTCCGTTGGATCTCGCGGAAGCGAGATCCGACGGAGCTGCGACACTCTTTCCCTA	27923.9
TDG_TG_f1TTT_f2TAAC_rep_4	11607	17920	17920	0	CGCAGCTCTTTTTAACCTCGCGGAAGCGAGGTTAGAAAGAGCTGCGACACTCTTTCCCTA	12047.6
TDG_TG_f1CGC_f2TAAC_rep_6	12579	26362	26362	0	CGCAGCTCCGCTTAACCTCGCGGAAGCGAGGTTAGGCGGAGCTGCGACACTCTTTCCCTA	17802.7
TDG_TG_f1TCT_f2CCCA_rep_9	9413	18627	18627	0	CGCAGCTCTCTTCCCACTCGCGGAAGCGAGTGGGGAGAGAGCTGCGACACTCTTTCCCTA	12564.6
TDG_TG_f1AGG_f2CTCG_rep_10	17141	30450	30450	0	CGCAGCTCAGGTCTCGCTCGCGGAAGCGAGCGAGGCCTGAGCTGCGACACTCTTTCCCTA	20610
TDG_TG_f1TAG_f2CTCA_rep_5	14308	30747	30747	0	CGCAGCTCTAGTCTCACTCGCGGAAGCGAGTGAGGCTAGAGCTGCGACACTCTTTCCCTA	21284.8
TDG_TG_f1GCT_f2GCTG_rep_2	20029	38624	38624	0	CGCAGCTCGCTTGCTGCTCGCGGAAGCGAGCAGCGAGCGAGCTGCGACACTCTTTCCCTA	26737.8
TDG_TG_f1GCT_f2GGAA_rep_1	18373	40127	40127	0	CGCAGCTCGCTTGGAACTCGCGGAAGCGAGTTCCGAGCGAGCTGCGACACTCTTTCCCTA	28318
TDG_TG_f1CGC_f2CATT_rep_3	12219	25841	25841	0	CGCAGCTCCGCTCATTCTCGCGGAAGCGAGAATGGGCGGAGCTGCGACACTCTTTCCCTA	18246.5
TDG_TG_f1TTC_f2GATT_rep_9	16165	27345	27345	0	CGCAGCTCTTCTGATTCTCGCGGAAGCGAGAATCGGAAGAGCTGCGACACTCTTTCCCTA	19308.4
dBr_7008	11765	26353	26353	0	CGCGAGATCAACTACAGTCGCGGAAGCGACTGTAGTTGATCTCGCGACACTCTTTCCCTA	18501.1
TDG_TG_f1TAT_f2ATAC_rep_10	13659	26285	26285	0	CGCAGCTCTATTATACCTCGCGGAAGCGAGGTATGATAGAGCTGCGACACTCTTTCCCTA	18560
TDG_TG_f1CCC_f2GCGG_rep_9	21208	38349	38349	0	CGCAGCTCCCCTGCGGCTCGCGGAAGCGAGCCGCGGGGGAGCTGCGACACTCTTTCCCTA	26922.9
TDG_TG_f1GTG_f2GGGC_rep_5	21178	47436	47436	0	CGCAGCTCGTGTGGGCCTCGCGGAAGCGAGGCCCGCACGAGCTGCGACACTCTTTCCCTA	33494.8
TDG_TG_f1AGC_f2TTTT_rep_8	9735	19705	19705	0	CGCAGCTCAGCTTTTTCTCGCGGAAGCGAGAAAAGGCTGAGCTGCGACACTCTTTCCCTA	13870.9
TDG_TG_f1CAG_f2TCAT_rep_6	10793	18061	18061	0	CGCAGCTCCAGTTCATCTCGCGGAAGCGAGATGAGCTGGAGCTGCGACACTCTTTCCCTA	12867.9
TDG_TG_f1CAC_f2AGGA_rep_10	12912	28850	28850	0	CGCAGCTCCACTAGGACTCGCGGAAGCGAGTCCTGGTGGAGCTGCGACACTCTTTCCCTA	20657.3
TDG_TG_f1GGG_f2TGAA_rep_10	11904	27789	27789	0	CGCAGCTCGGGTTGAACTCGCGGAAGCGAGTTCAGCCCGAGCTGCGACACTCTTTCCCTA	20109.4
TDG_TG_f1GCC_f2GAGC_rep_5	14729	23087	23087	0	CGCAGCTCGCCTGAGCCTCGCGGAAGCGAGGCTCGGGCGAGCTGCGACACTCTTTCCCTA	16767.5
TDG_TG_f1ACA_f2AGTA_rep_9	11556	26061	26061	0	CGCAGCTCACATAGTACTCGCGGAAGCGAGTACTGTGTGAGCTGCGACACTCTTTCCCTA	18970.8
TDG_TG_f1GCC_f2CGGC_rep_2	9027	19751	19751	0	CGCAGCTCGCCTCGGCCTCGCGGAAGCGAGGCCGGGGCGAGCTGCGACACTCTTTCCCTA	14704.7
TDG_TG_f1TCC_f2GTAG_rep_6	14037	24518	24518	0	CGCAGCTCTCCTGTAGCTCGCGGAAGCGAGCTACGGGAGAGCTGCGACACTCTTTCCCTA	18425.6
TDG_TG_f1TCG_f2ACGC_rep_10	11272	24900	24900	0	CGCAGCTCTCGTACGCCTCGCGGAAGCGAGGCGTGCGAGAGCTGCGACACTCTTTCCCTA	18683.4
TDG_TG_f1GCG_f2ATAA_rep_3	10420	22120	22120	0	CGCAGCTCGCGTATAACTCGCGGAAGCGAGTTATGCGCGAGCTGCGACACTCTTTCCCTA	16795
TDG_TG_f1ATG_f2CCTG_rep_5	9250	14854	14854	0	CGCAGCTCATGTCCTGCTCGCGGAAGCGAGCAGGGCATGAGCTGCGACACTCTTTCCCTA	11454.7
TDG_TG_f1AGC_f2GTTC_rep_5	14899	34909	34909	0	CGCAGCTCAGCTGTTCCTCGCGGAAGCGAGGAACGGCTGAGCTGCGACACTCTTTCCCTA	27296.7
TDG_TG_f1CTA_f2GGTG_rep_9	14038	31131	31131	0	CGCAGCTCCTATGGTGCTCGCGGAAGCGAGCACCGTAGGAGCTGCGACACTCTTTCCCTA	24750.2
TDG_TG_f1TTG_f2CTCG_rep_8	10942	20208	20208	0	CGCAGCTCTTGTCTCGCTCGCGGAAGCGAGCGAGGCAAGAGCTGCGACACTCTTTCCCTA	16419.3
TDG_TG_f1TAT_f2TATT_rep_4	7745	14962	14962	0	CGCAGCTCTATTTATTCTCGCGGAAGCGAGAATAGATAGAGCTGCGACACTCTTTCCCTA	12304.5
TDG_TG_f1AAA_f2CCCG_rep_7	7989	16053	16053	0	CGCAGCTCAAATCCCGCTCGCGGAAGCGAGCGGGGTTTGAGCTGCGACACTCTTTCCCTA	13486.9
TDG_TG_f1AGC_f2TTGA_rep_6	7878	14098	14098	0	CGCAGCTCAGCTTTGACTCGCGGAAGCGAGTCAAGGCTGAGCTGCGACACTCTTTCCCTA	11872
TDG_TG_f1CTG_f2TCTT_rep_4	7292	15588	15588	0	CGCAGCTCCTGTTCTTCTCGCGGAAGCGAGAAGAGCAGGAGCTGCGACACTCTTTCCCTA	13224.3
TDG_TG_f1TTA_f2ATCT_rep_9	8554	16131	16131	0	CGCAGCTCTTATATCTCTCGCGGAAGCGAGAGATGTAAGAGCTGCGACACTCTTTCCCTA	13825.1
TDG_TG_f1CAA_f2ATGT_rep_5	9108	14962	14962	0	CGCAGCTCCAATATGTCTCGCGGAAGCGAGACATGTTGGAGCTGCGACACTCTTTCCCTA	13137.5
TDG_TG_f1GCC_f2ATAA_rep_7	7821	18368	18368	0	CGCAGCTCGCCTATAACTCGCGGAAGCGAGTTATGGGCGAGCTGCGACACTCTTTCCCTA	16611.3
TDG_TG_f1TTT_f2CGAT_rep_5	7580	15388	15388	0	CGCAGCTCTTTTCGATCTCGCGGAAGCGAGATCGGAAAGAGCTGCGACACTCTTTCCCTA	14276.7
TDG_TG_f1TCT_f2GCCG_rep_10	12404	23337	23337	0	CGCAGCTCTCTTGCCGCTCGCGGAAGCGAGCGGCGAGAGAGCTGCGACACTCTTTCCCTA	21872.6
TDG_TG_f1CTA_f2TAAG_rep_5	5489	11959	11959	0	CGCAGCTCCTATTAAGCTCGCGGAAGCGAGCTTAGTAGGAGCTGCGACACTCTTTCCCTA	11282.6
TDG_TG_f1CCC_f2CCCG_rep_10	7421	13438	13438	0	CGCAGCTCCCCTCCCGCTCGCGGAAGCGAGCGGGGGGGGAGCTGCGACACTCTTTCCCTA	12751.2
TDG_TG_f1TTA_f2GGTT_rep_8	11340	20759	20759	0	CGCAGCTCTTATGGTTCTCGCGGAAGCGAGAACCGTAAGAGCTGCGACACTCTTTCCCTA	19887.9
TDG_TG_f1TAT_f2ACGT_rep_7	7902	16034	16034	0	CGCAGCTCTATTACGTCTCGCGGAAGCGAGACGTGATAGAGCTGCGACACTCTTTCCCTA	15786.9
TDG_TG_f1ACA_f2ATAT_rep_3	6480	14113	14113	0	CGCAGCTCACATATATCTCGCGGAAGCGAGATATGTGTGAGCTGCGACACTCTTTCCCTA	14004.7
TDG_TG_f1ACC_f2GACG_rep_7	14211	24684	24684	0	CGCAGCTCACCTGACGCTCGCGGAAGCGAGCGTCGGGTGAGCTGCGACACTCTTTCCCTA	24571.2
dBr_4596	7527	15283	15283	0	CGCAAGTTCGGTCGGTAACGCGGAAGCGTTACCGACCGAACTTGCGACACTCTTTCCCTA	15263.2
TDG_TG_f1CCA_f2GCTA_rep_2	12617	23826	23826	0	CGCAGCTCCCATGCTACTCGCGGAAGCGAGTAGCGTGGGAGCTGCGACACTCTTTCCCTA	23767.3
TDG_TG_f1AAT_f2TGAC_rep_9	6165	10120	10120	0	CGCAGCTCAATTTGACCTCGCGGAAGCGAGGTCAGATTGAGCTGCGACACTCTTTCCCTA	10059
TDG_TG_f1TGG_f2GCGG_rep_1	16239	29972	29972	0	CGCAGCTCTGGTGCGGCTCGCGGAAGCGAGCCGCGCCAGAGCTGCGACACTCTTTCCCTA	29788
TDG_TG_f1CTT_f2AATT_rep_4	6666	13577	13577	0	CGCAGCTCCTTTAATTCTCGCGGAAGCGAGAATTGAAGGAGCTGCGACACTCTTTCCCTA	13464.1
TDG_TG_f1ATG_f2ACCC_rep_5	8151	13744	13744	0	CGCAGCTCATGTACCCCTCGCGGAAGCGAGGGGTGCATGAGCTGCGACACTCTTTCCCTA	13660.4
TDG_TG_f1GAC_f2GGCA_rep_7	13311	24458	24458	0	CGCAGCTCGACTGGCACTCGCGGAAGCGAGTGCCGGTCGAGCTGCGACACTCTTTCCCTA	24357.7
TDG_TG_f1GCG_f2AGAA_rep_6	7938	14999	14999	0	CGCAGCTCGCGTAGAACTCGCGGAAGCGAGTTCTGCGCGAGCTGCGACACTCTTTCCCTA	14907.8
TDG_TG_f1TCT_f2TGCG_rep_9	7056	12600	12600	0	CGCAGCTCTCTTTGCGCTCGCGGAAGCGAGCGCAGAGAGAGCTGCGACACTCTTTCCCTA	12514.6
TDG_TG_f1GTC_f2GCTT_rep_9	11353	24781	24781	0	CGCAGCTCGTCTGCTTCTCGCGGAAGCGAGAAGCGGACGAGCTGCGACACTCTTTCCCTA	24654.8
TDG_TG_f1CTT_f2ATGT_rep_4	6585	14197	14197	0	CGCAGCTCCTTTATGTCTCGCGGAAGCGAGACATGAAGGAGCTGCGACACTCTTTCCCTA	14110.7
TDG_TG_f1TAT_f2AGTT_rep_6	7821	14112	14112	0	CGCAGCTCTATTAGTTCTCGCGGAAGCGAGAACTGATAGAGCTGCGACACTCTTTCCCTA	14007.3
TDG_TG_f1CAT_f2TAGT_rep_6	6337	12588	12588	0	CGCAGCTCCATTTAGTCTCGCGGAAGCGAGACTAGATGGAGCTGCGACACTCTTTCCCTA	12325.5
TDG_TG_f1CGC_f2ACAT_rep_7	7599	17199	17199	0	CGCAGCTCCGCTACATCTCGCGGAAGCGAGATGTGGCGGAGCTGCGACACTCTTTCCCTA	16756.4
TDG_TG_f1TTC_f2CCTG_rep_3	6314	11241	11241	0	CGCAGCTCTTCTCCTGCTCGCGGAAGCGAGCAGGGGAAGAGCTGCGACACTCTTTCCCTA	10951.7
TDG_TG_f1GTC_f2ACCG_rep_8	8115	17607	17607	0	CGCAGCTCGTCTACCGCTCGCGGAAGCGAGCGGTGGACGAGCTGCGACACTCTTTCCCTA	17269.7
TDG_TG_f1AAC_f2TGTC_rep_9	6452	13531	13531	0	CGCAGCTCAACTTGTCCTCGCGGAAGCGAGGACAGGTTGAGCTGCGACACTCTTTCCCTA	13251.1
TDG_TG_f1TGT_f2TCGA_rep_2	6212	12144	12144	0	CGCAGCTCTGTTTCGACTCGCGGAAGCGAGTCGAGACAGAGCTGCGACACTCTTTCCCTA	11863.4
TDG_TG_f1TGT_f2AGAT_rep_1	7534	14645	14645	0	CGCAGCTCTGTTAGATCTCGCGGAAGCGAGATCTGACAGAGCTGCGACACTCTTTCCCTA	14268.1
TDG_TG_f1CTT_f2CTAA_rep_6	6646	12090	12090	0	CGCAGCTCCTTTCTAACTCGCGGAAGCGAGTTAGGAAGGAGCTGCGACACTCTTTCCCTA	11794.7
TDG_TG_f1CGC_f2CGGG_rep_6	6447	13524	13524	0	CGCAGCTCCGCTCGGGCTCGCGGAAGCGAGCCCGGGCGGAGCTGCGACACTCTTTCCCTA	13225.6
TDG_TG_f1ACA_f2CCCG_rep_2	7016	12888	12888	0	CGCAGCTCACATCCCGCTCGCGGAAGCGAGCGGGGTGTGAGCTGCGACACTCTTTCCCTA	12477.3
TDG_TG_f1TCC_f2CCCA_rep_2	6869	12970	12970	0	CGCAGCTCTCCTCCCACTCGCGGAAGCGAGTGGGGGGAGAGCTGCGACACTCTTTCCCTA	12400.9
TDG_TG_f1AAC_f2ATCT_rep_3	7373	14514	14514	0	CGCAGCTCAACTATCTCTCGCGGAAGCGAGAGATGGTTGAGCTGCGACACTCTTTCCCTA	13787.2
TDG_TG_f1CGG_f2AATA_rep_8	8558	15195	15195	0	CGCAGCTCCGGTAATACTCGCGGAAGCGAGTATTGCCGGAGCTGCGACACTCTTTCCCTA	14330.8
TDG_TG_f1CGA_f2GTTC_rep_5	10902	20016	20016	0	CGCAGCTCCGATGTTCCTCGCGGAAGCGAGGAACGTCGGAGCTGCGACACTCTTTCCCTA	18842
TDG_TG_f1TAA_f2GCCT_rep_7	9172	18118	18118	0	CGCAGCTCTAATGCCTCTCGCGGAAGCGAGAGGCGTTAGAGCTGCGACACTCTTTCCCTA	16843.6
TDG_TG_f1TAG_f2TAAG_rep_5	5519	11487	11487	0	CGCAGCTCTAGTTAAGCTCGCGGAAGCGAGCTTAGCTAGAGCTGCGACACTCTTTCCCTA	10603
dBr_3051	8351	17659	17659	0	CGCCCTTTTTGCAACCACCGCGGAAGCGGTGGTTGCAAAAAGGGCGACACTCTTTCCCTA	16417.8
TDG_TG_f1AAA_f2ATCG_rep_1	9822	19597	19597	0	CGCAGCTCAAATATCGCTCGCGGAAGCGAGCGATGTTTGAGCTGCGACACTCTTTCCCTA	17916.7
TDG_TG_f1GAG_f2TGAG_rep_4	6337	12350	12350	0	CGCAGCTCGAGTTGAGCTCGCGGAAGCGAGCTCAGCTCGAGCTGCGACACTCTTTCCCTA	11101.8
TDG_TG_f1TTG_f2AGGA_rep_8	8795	17134	17134	0	CGCAGCTCTTGTAGGACTCGCGGAAGCGAGTCCTGCAAGAGCTGCGACACTCTTTCCCTA	15388.5
TDG_TG_f1CCT_f2GGGT_rep_9	10586	21678	21678	0	CGCAGCTCCCTTGGGTCTCGCGGAAGCGAGACCCGAGGGAGCTGCGACACTCTTTCCCTA	19256.4
TDG_TG_f1CGG_f2ATGG_rep_2	8337	17063	17063	0	CGCAGCTCCGGTATGGCTCGCGGAAGCGAGCCATGCCGGAGCTGCGACACTCTTTCCCTA	15132
TDG_TG_f1GAT_f2AGCC_rep_7	9930	21336	21336	0	CGCAGCTCGATTAGCCCTCGCGGAAGCGAGGGCTGATCGAGCTGCGACACTCTTTCCCTA	18919.4
TDG_TG_f1CAG_f2CACG_rep_1	9410	18505	18505	0	CGCAGCTCCAGTCACGCTCGCGGAAGCGAGCGTGGCTGGAGCTGCGACACTCTTTCCCTA	16299
TDG_TG_f1TCT_f2CGAT_rep_8	7714	12942	12942	0	CGCAGCTCTCTTCGATCTCGCGGAAGCGAGATCGGAGAGAGCTGCGACACTCTTTCCCTA	11383.5
TDG_TG_f1CGG_f2GGAA_rep_1	16940	34879	34879	0	CGCAGCTCCGGTGGAACTCGCGGAAGCGAGTTCCGCCGGAGCTGCGACACTCTTTCCCTA	30498.9
TDG_TG_f1TGG_f2TATG_rep_6	6767	14583	14583	0	CGCAGCTCTGGTTATGCTCGCGGAAGCGAGCATAGCCAGAGCTGCGACACTCTTTCCCTA	12695.5
TDG_TG_f1CGG_f2GGAA_rep_4	17420	35117	35117	0	CGCAGCTCCGGTGGAACTCGCGGAAGCGAGTTCCGCCGGAGCTGCGACACTCTTTCCCTA	30217.4
TDG_TG_f1CGT_f2CCAT_rep_9	8065	16520	16520	0	CGCAGCTCCGTTCCATCTCGCGGAAGCGAGATGGGACGGAGCTGCGACACTCTTTCCCTA	14139.9
TDG_TG_f1ACC_f2ACGT_rep_8	9505	16838	16838	0	CGCAGCTCACCTACGTCTCGCGGAAGCGAGACGTGGGTGAGCTGCGACACTCTTTCCCTA	14444.8
TDG_TG_f1GGA_f2CAGC_rep_1	7074	14300	14300	0	CGCAGCTCGGATCAGCCTCGCGGAAGCGAGGCTGGTCCGAGCTGCGACACTCTTTCCCTA	12407.8
TDG_TG_f1CGA_f2ATCA_rep_6	8718	19358	19358	0	CGCAGCTCCGATATCACTCGCGGAAGCGAGTGATGTCGGAGCTGCGACACTCTTTCCCTA	16750
TDG_TG_f1TCT_f2GATT_rep_2	10527	19475	19475	0	CGCAGCTCTCTTGATTCTCGCGGAAGCGAGAATCGAGAGAGCTGCGACACTCTTTCCCTA	16785.8
TDG_TG_f1ACA_f2TGCC_rep_8	7776	14805	14805	0	CGCAGCTCACATTGCCCTCGCGGAAGCGAGGGCAGTGTGAGCTGCGACACTCTTTCCCTA	12696.9
TDG_TG_f1GCT_f2GCAG_rep_7	13589	28818	28818	0	CGCAGCTCGCTTGCAGCTCGCGGAAGCGAGCTGCGAGCGAGCTGCGACACTCTTTCCCTA	24782.2
TDG_TG_f1CCG_f2GAAA_rep_10	13873	21606	21606	0	CGCAGCTCCCGTGAAACTCGCGGAAGCGAGTTTCGCGGGAGCTGCGACACTCTTTCCCTA	18379.3
TDG_TG_f1CGT_f2AAGA_rep_8	8512	17731	17731	0	CGCAGCTCCGTTAAGACTCGCGGAAGCGAGTCTTGACGGAGCTGCGACACTCTTTCCCTA	14702.2
TDG_TG_f1CAA_f2CGCT_rep_9	8087	15691	15691	0	CGCAGCTCCAATCGCTCTCGCGGAAGCGAGAGCGGTTGGAGCTGCGACACTCTTTCCCTA	13010.7
TDG_TG_f1TAT_f2TTTG_rep_4	7087	15054	15054	0	CGCAGCTCTATTTTTGCTCGCGGAAGCGAGCAAAGATAGAGCTGCGACACTCTTTCCCTA	12579.2
TDG_TG_f1ATA_f2TTGT_rep_8	6305	13559	13559	0	CGCAGCTCATATTTGTCTCGCGGAAGCGAGACAAGTATGAGCTGCGACACTCTTTCCCTA	11366.3
TDG_TG_f1TTG_f2GATA_rep_8	16641	33683	33683	0	CGCAGCTCTTGTGATACTCGCGGAAGCGAGTATCGCAAGAGCTGCGACACTCTTTCCCTA	28174.7
TDG_TG_linker_10_rep_3	17656	35360	35360	0	CGCAGCTCCAGTGTATCTCGCGGAAGCGAGATACGCTGGAGCTGCGAATTTAGCCCTTAA	29641.6
TDG_TG_f1AGT_f2GGGG_rep_5	12370	27909	27909	0	CGCAGCTCAGTTGGGGCTCGCGGAAGCGAGCCCCGACTGAGCTGCGACACTCTTTCCCTA	23511.6
TDG_TG_f1GAG_f2TGAT_rep_9	8315	14015	14015	0	CGCAGCTCGAGTTGATCTCGCGGAAGCGAGATCAGCTCGAGCTGCGACACTCTTTCCCTA	11715
TDG_TG_f1GGC_f2GAAC_rep_2	12163	26630	26630	0	CGCAGCTCGGCTGAACCTCGCGGAAGCGAGGTTCGGCCGAGCTGCGACACTCTTTCCCTA	21717.2
TDG_TG_f1TCT_f2CCAA_rep_3	7002	13213	13213	0	CGCAGCTCTCTTCCAACTCGCGGAAGCGAGTTGGGAGAGAGCTGCGACACTCTTTCCCTA	10680.6
TDG_TG_f1CCT_f2TTCC_rep_5	9757	16419	16419	0	CGCAGCTCCCTTTTCCCTCGCGGAAGCGAGGGAAGAGGGAGCTGCGACACTCTTTCCCTA	13152.4
TDG_TG_f1AAT_f2AAGA_rep_2	9546	21215	21215	0	CGCAGCTCAATTAAGACTCGCGGAAGCGAGTCTTGATTGAGCTGCGACACTCTTTCCCTA	16914.9
TDG_TG_f1ACC_f2ATGG_rep_5	9818	19140	19140	0	CGCAGCTCACCTATGGCTCGCGGAAGCGAGCCATGGGTGAGCTGCGACACTCTTTCCCTA	15207
TDG_TG_random_2TG_4_rep_5	10936	17421	17421	0	CGCAGTCGCTCTTATGACCGCGGAAGCGGTCATGAGGGCGACTGCGACACTCTTTCCCTA	13838
TDG_TG_f1GTA_f2TATC_rep_6	8228	18527	18527	0	CGCAGCTCGTATTATCCTCGCGGAAGCGAGGATAGTACGAGCTGCGACACTCTTTCCCTA	14716.5
TDG_TG_f1AAG_f2GTCA_rep_10	23392	48395	48395	0	CGCAGCTCAAGTGTCACTCGCGGAAGCGAGTGACGCTTGAGCTGCGACACTCTTTCCCTA	37163.2
dBr_4125	13151	20506	20506	0	CGCAGGCGATTTGCATAACGCGGAAGCGTTATGCAAATCGCCTGCGACACTCTTTCCCTA	15461.5
TDG_TG_f1CCC_f2CTTC_rep_3	10595	21400	21400	0	CGCAGCTCCCCTCTTCCTCGCGGAAGCGAGGAAGGGGGGAGCTGCGACACTCTTTCCCTA	16021.5
TDG_TG_f1CTA_f2TAGC_rep_8	9009	19037	19037	0	CGCAGCTCCTATTAGCCTCGCGGAAGCGAGGCTAGTAGGAGCTGCGACACTCTTTCCCTA	13895
dBr_0200	13695	22645	22645	0	CGCCCATGTACAGACGTGCGCGGAAGCGCACGTCTGTACATGGGCGACACTCTTTCCCTA	16415.6
dBr_0757	12508	27410	27410	0	CGCAAGATCGACATCCCCCGCGGAAGCGGGGGATGTCGATCTTGCGACACTCTTTCCCTA	19506.3
TDG_TG_f1CTG_f2CGTC_rep_9	11488	25703	25703	0	CGCAGCTCCTGTCGTCCTCGCGGAAGCGAGGACGGCAGGAGCTGCGACACTCTTTCCCTA	17903.2
TDG_TG_f1CCG_f2TGCT_rep_6	13543	23447	23447	0	CGCAGCTCCCGTTGCTCTCGCGGAAGCGAGAGCAGCGGGAGCTGCGACACTCTTTCCCTA	16157.7
TDG_TG_f1CCT_f2GCCA_rep_8	20569	42475	42475	0	CGCAGCTCCCTTGCCACTCGCGGAAGCGAGTGGCGAGGGAGCTGCGACACTCTTTCCCTA	28842.1
TDG_TG_f1CAC_f2GTTG_rep_1	19600	42727	42727	0	CGCAGCTCCACTGTTGCTCGCGGAAGCGAGCAACGGTGGAGCTGCGACACTCTTTCCCTA	28506.5
TDG_TG_f1GTA_f2CCCG_rep_3	13690	22527	22527	0	CGCAGCTCGTATCCCGCTCGCGGAAGCGAGCGGGGTACGAGCTGCGACACTCTTTCCCTA	14886.9
TDG_TG_f1GAA_f2GCTA_rep_4	19345	39876	39876	0	CGCAGCTCGAATGCTACTCGCGGAAGCGAGTAGCGTTCGAGCTGCGACACTCTTTCCCTA	26223.5
TDG_TG_f1TGA_f2GTGC_rep_3	15153	33265	33265	0	CGCAGCTCTGATGTGCCTCGCGGAAGCGAGGCACGTCAGAGCTGCGACACTCTTTCCCTA	21634.9
TDG_TG_f1ATA_f2GGTC_rep_9	23016	37658	37658	0	CGCAGCTCATATGGTCCTCGCGGAAGCGAGGACCGTATGAGCTGCGACACTCTTTCCCTA	24390.2
TDG_TG_f1CCC_f2ATAC_rep_6	15341	32501	32501	0	CGCAGCTCCCCTATACCTCGCGGAAGCGAGGTATGGGGGAGCTGCGACACTCTTTCCCTA	20409.3
TDG_TG_f1TAT_f2CCAG_rep_4	11251	21784	21784	0	CGCAGCTCTATTCCAGCTCGCGGAAGCGAGCTGGGATAGAGCTGCGACACTCTTTCCCTA	13528
TDG_TG_f1GTG_f2CCTT_rep_8	11533	25881	25881	0	CGCAGCTCGTGTCCTTCTCGCGGAAGCGAGAAGGGCACGAGCTGCGACACTCTTTCCCTA	16037.2
TDG_TG_f1TCC_f2CGGT_rep_4	11414	27469	27469	0	CGCAGCTCTCCTCGGTCTCGCGGAAGCGAGACCGGGGAGAGCTGCGACACTCTTTCCCTA	17021.2
TDG_TG_f1TGT_f2GTGA_rep_3	18508	33223	33223	0	CGCAGCTCTGTTGTGACTCGCGGAAGCGAGTCACGACAGAGCTGCGACACTCTTTCCCTA	20668.4
TDG_TG_f1GGA_f2TCCC_rep_5	13438	25582	25582	0	CGCAGCTCGGATTCCCCTCGCGGAAGCGAGGGGAGTCCGAGCTGCGACACTCTTTCCCTA	15987.1
TDG_TG_f1GTG_f2CACG_rep_1	13031	30515	30515	0	CGCAGCTCGTGTCACGCTCGCGGAAGCGAGCGTGGCACGAGCTGCGACACTCTTTCCCTA	19298.4
TDG_TG_f1ACA_f2ACCC_rep_2	14025	29386	29386	0	CGCAGCTCACATACCCCTCGCGGAAGCGAGGGGTGTGTGAGCTGCGACACTCTTTCCCTA	18498.3
TDG_TG_f1GAA_f2ATTG_rep_4	14438	28774	28774	0	CGCAGCTCGAATATTGCTCGCGGAAGCGAGCAATGTTCGAGCTGCGACACTCTTTCCCTA	18157.5
TDG_TG_f1TGA_f2TCCA_rep_1	11939	23012	23012	0	CGCAGCTCTGATTCCACTCGCGGAAGCGAGTGGAGTCAGAGCTGCGACACTCTTTCCCTA	14581.5
TDG_TG_f1ATC_f2TCTT_rep_3	11768	20664	20664	0	CGCAGCTCATCTTCTTCTCGCGGAAGCGAGAAGAGGATGAGCTGCGACACTCTTTCCCTA	13093.7
TDG_TG_f1CGA_f2GTGC_rep_6	17956	35843	35843	0	CGCAGCTCCGATGTGCCTCGCGGAAGCGAGGCACGTCGGAGCTGCGACACTCTTTCCCTA	23036.5
TDG_TG_f1TGC_f2CAGT_rep_5	11910	22845	22845	0	CGCAGCTCTGCTCAGTCTCGCGGAAGCGAGACTGGGCAGAGCTGCGACACTCTTTCCCTA	14757.4
TDG_TG_f1CCG_f2CCGG_rep_6	11245	21153	21153	0	CGCAGCTCCCGTCCGGCTCGCGGAAGCGAGCCGGGCGGGAGCTGCGACACTCTTTCCCTA	13708.2
TDG_TG_f1AGG_f2AATC_rep_9	12382	27849	27849	0	CGCAGCTCAGGTAATCCTCGCGGAAGCGAGGATTGCCTGAGCTGCGACACTCTTTCCCTA	18236.6
TDG_TG_f1TAG_f2AATT_rep_1	12034	22776	22776	0	CGCAGCTCTAGTAATTCTCGCGGAAGCGAGAATTGCTAGAGCTGCGACACTCTTTCCCTA	14940.5
TDG_TG_f1GAG_f2AAAT_rep_2	12364	25947	25947	0	CGCAGCTCGAGTAAATCTCGCGGAAGCGAGATTTGCTCGAGCTGCGACACTCTTTCCCTA	16964.3
TDG_TG_f1ATG_f2TGTC_rep_1	11834	24230	24230	0	CGCAGCTCATGTTGTCCTCGCGGAAGCGAGGACAGCATGAGCTGCGACACTCTTTCCCTA	15719
TDG_TG_f1GAC_f2ATAA_rep_4	13428	26896	26896	0	CGCAGCTCGACTATAACTCGCGGAAGCGAGTTATGGTCGAGCTGCGACACTCTTTCCCTA	17618.7
TDG_TG_f1CGC_f2TTAT_rep_2	11445	20645	20645	0	CGCAGCTCCGCTTTATCTCGCGGAAGCGAGATAAGGCGGAGCTGCGACACTCTTTCCCTA	13528.5
TDG_TG_f1TAT_f2GTAA_rep_1	21056	38689	38689	0	CGCAGCTCTATTGTAACTCGCGGAAGCGAGTTACGATAGAGCTGCGACACTCTTTCCCTA	25452.2
dBr_3468	15989	31226	31226	0	CGCCACTAGCGGGAACGTCGCGGAAGCGACGTTCCCGCTAGTGGCGACACTCTTTCCCTA	20626.8
TDG_TG_f1AGG_f2TGGA_rep_4	11157	22278	22278	0	CGCAGCTCAGGTTGGACTCGCGGAAGCGAGTCCAGCCTGAGCTGCGACACTCTTTCCCTA	14822.6
TDG_TG_f1GAT_f2GTAG_rep_7	20944	47720	47720	0	CGCAGCTCGATTGTAGCTCGCGGAAGCGAGCTACGATCGAGCTGCGACACTCTTTCCCTA	32366.2
TDG_TG_f1ATG_f2CTGT_rep_6	11007	22463	22463	0	CGCAGCTCATGTCTGTCTCGCGGAAGCGAGACAGGCATGAGCTGCGACACTCTTTCCCTA	15778.3
TDG_TG_f1ATA_f2GGGG_rep_3	19276	37672	37672	0	CGCAGCTCATATGGGGCTCGCGGAAGCGAGCCCCGTATGAGCTGCGACACTCTTTCCCTA	27195.8
TDG_TG_f1CAG_f2GGCT_rep_4	23371	47327	47327	0	CGCAGCTCCAGTGGCTCTCGCGGAAGCGAGAGCCGCTGGAGCTGCGACACTCTTTCCCTA	35201.9
TDG_TG_f1TGC_f2GTGT_rep_10	15799	28570	28570	0	CGCAGCTCTGCTGTGTCTCGCGGAAGCGAGACACGGCAGAGCTGCGACACTCTTTCCCTA	22318.4
TDG_TG_f1TTA_f2AATA_rep_4	9863	19572	19572	0	CGCAGCTCTTATAATACTCGCGGAAGCGAGTATTGTAAGAGCTGCGACACTCTTTCCCTA	15949.8
TDG_TG_f1GTG_f2AACC_rep_2	11782	26772	26772	0	CGCAGCTCGTGTAACCCTCGCGGAAGCGAGGGTTGCACGAGCTGCGACACTCTTTCCCTA	22343.3
TDG_TG_f1GTC_f2CCCC_rep_7	11694	24771	24771	0	CGCAGCTCGTCTCCCCCTCGCGGAAGCGAGGGGGGGACGAGCTGCGACACTCTTTCCCTA	21220.9
TDG_TG_f1ATC_f2CGAA_rep_1	9896	18940	18940	0	CGCAGCTCATCTCGAACTCGCGGAAGCGAGTTCGGGATGAGCTGCGACACTCTTTCCCTA	16657.9
TDG_TG_f1TGT_f2GAAG_rep_10	12098	26695	26695	0	CGCAGCTCTGTTGAAGCTCGCGGAAGCGAGCTTCGACAGAGCTGCGACACTCTTTCCCTA	24145.8
TDG_TG_f1CTT_f2CGCC_rep_3	10577	18736	18736	0	CGCAGCTCCTTTCGCCCTCGCGGAAGCGAGGGCGGAAGGAGCTGCGACACTCTTTCCCTA	17432.4
TDG_TG_f1CGT_f2CTGC_rep_3	10034	20366	20366	0	CGCAGCTCCGTTCTGCCTCGCGGAAGCGAGGCAGGACGGAGCTGCGACACTCTTTCCCTA	19326.7
TDG_TG_f1GAC_f2CAAA_rep_4	7363	14894	14894	0	CGCAGCTCGACTCAAACTCGCGGAAGCGAGTTTGGGTCGAGCTGCGACACTCTTTCCCTA	14343
TDG_TG_f1TAA_f2GAAA_rep_5	10508	20313	20313	0	CGCAGCTCTAATGAAACTCGCGGAAGCGAGTTTCGTTAGAGCTGCGACACTCTTTCCCTA	20106
TDG_TG_f1TCG_f2AACA_rep_5	8324	17120	17120	0	CGCAGCTCTCGTAACACTCGCGGAAGCGAGTGTTGCGAGAGCTGCGACACTCTTTCCCTA	17499.9
TDG_TG_f1TGC_f2AGCG_rep_3	21462	40186	40186	0	CGCAGCTCTGCTAGCGCTCGCGGAAGCGAGCGCTGGCAGAGCTGCGACACTCTTTCCCTA	22671.3
TDG_TG_f1GTA_f2ATAA_rep_5	16659	33689	33689	0	CGCAGCTCGTATATAACTCGCGGAAGCGAGTTATGTACGAGCTGCGACACTCTTTCCCTA	18684.1
TDG_TG_f1ACC_f2GCGC_rep_7	29542	48047	48047	0	CGCAGCTCACCTGCGCCTCGCGGAAGCGAGGCGCGGGTGAGCTGCGACACTCTTTCCCTA	26453.8
TDG_TG_f1CCC_f2GGAC_rep_5	24779	40369	40369	0	CGCAGCTCCCCTGGACCTCGCGGAAGCGAGGTCCGGGGGAGCTGCGACACTCTTTCCCTA	22121.8
TDG_TG_f1TCG_f2AGAT_rep_9	16963	31164	31164	0	CGCAGCTCTCGTAGATCTCGCGGAAGCGAGATCTGCGAGAGCTGCGACACTCTTTCCCTA	16881.1
TDG_TG_f1GAA_f2ATCT_rep_3	17459	27947	27947	0	CGCAGCTCGAATATCTCTCGCGGAAGCGAGAGATGTTCGAGCTGCGACACTCTTTCCCTA	14869.5
TDG_TG_f1CTC_f2AGAA_rep_4	16116	29874	29874	0	CGCAGCTCCTCTAGAACTCGCGGAAGCGAGTTCTGGAGGAGCTGCGACACTCTTTCCCTA	15812.9
TDG_TG_f1AGC_f2TCTA_rep_8	14192	28594	28594	0	CGCAGCTCAGCTTCTACTCGCGGAAGCGAGTAGAGGCTGAGCTGCGACACTCTTTCCCTA	14998.1
TDG_TG_f1CTC_f2TGGT_rep_1	14689	27767	27767	0	CGCAGCTCCTCTTGGTCTCGCGGAAGCGAGACCAGGAGGAGCTGCGACACTCTTTCCCTA	14598.1
TDG_TG_f1CCA_f2ACTA_rep_4	15302	28584	28584	0	CGCAGCTCCCATACTACTCGCGGAAGCGAGTAGTGTGGGAGCTGCGACACTCTTTCCCTA	15102.3
TDG_TG_f1GTA_f2AACA_rep_7	16546	34507	34507	0	CGCAGCTCGTATAACACTCGCGGAAGCGAGTGTTGTACGAGCTGCGACACTCTTTCCCTA	18335.2
TDG_TG_f1GCT_f2ATAC_rep_8	18873	33298	33298	0	CGCAGCTCGCTTATACCTCGCGGAAGCGAGGTATGAGCGAGCTGCGACACTCTTTCCCTA	17784.3
TDG_TG_f1GAC_f2TCGC_rep_4	15933	27845	27845	0	CGCAGCTCGACTTCGCCTCGCGGAAGCGAGGCGAGGTCGAGCTGCGACACTCTTTCCCTA	14766.1
TDG_TG_f1CTT_f2AGTT_rep_3	18048	31976	31976	0	CGCAGCTCCTTTAGTTCTCGCGGAAGCGAGAACTGAAGGAGCTGCGACACTCTTTCCCTA	17054.6
TDG_TG_f1GGT_f2ATCT_rep_8	20280	33384	33384	0	CGCAGCTCGGTTATCTCTCGCGGAAGCGAGAGATGACCGAGCTGCGACACTCTTTCCCTA	18034.2
TDG_TG_f1TCG_f2AGAA_rep_9	16770	25140	25140	0	CGCAGCTCTCGTAGAACTCGCGGAAGCGAGTTCTGCGAGAGCTGCGACACTCTTTCCCTA	13812.8
TDG_TG_f1TTA_f2TTTT_rep_5	11942	24550	24550	0	CGCAGCTCTTATTTTTCTCGCGGAAGCGAGAAAAGTAAGAGCTGCGACACTCTTTCCCTA	13494.9
TDG_TG_f1TAT_f2TTCC_rep_4	15892	27862	27862	0	CGCAGCTCTATTTTCCCTCGCGGAAGCGAGGGAAGATAGAGCTGCGACACTCTTTCCCTA	15308.3
TDG_TG_f1CGT_f2GATC_rep_4	25181	36599	36599	0	CGCAGCTCCGTTGATCCTCGCGGAAGCGAGGATCGACGGAGCTGCGACACTCTTTCCCTA	20178.2
TDG_TG_f1CGT_f2GACC_rep_9	22956	41117	41117	0	CGCAGCTCCGTTGACCCTCGCGGAAGCGAGGGTCGACGGAGCTGCGACACTCTTTCCCTA	23090.8
TDG_TG_f1GCC_f2GCAG_rep_7	22910	46141	46141	0	CGCAGCTCGCCTGCAGCTCGCGGAAGCGAGCTGCGGGCGAGCTGCGACACTCTTTCCCTA	26198.7
dBr_5941	15430	26236	26236	0	CGCACACTAGGTTCCTCCCGCGGAAGCGGGAGGAACCTAGTGTGCGACACTCTTTCCCTA	14942.1
TDG_TG_f1TAA_f2GGGG_rep_4	18526	37926	37926	0	CGCAGCTCTAATGGGGCTCGCGGAAGCGAGCCCCGTTAGAGCTGCGACACTCTTTCCCTA	21716.7
TDG_TG_f1ACA_f2GTCC_rep_5	31546	55554	62219	0	CGCAGCTCACATGTCCCTCGCGGAAGCGAGGGACGTGTGAGCTGCGACACTCTTTCCCTA	35722.8
TDG_TG_f1AAG_f2TTCC_rep_7	16096	28287	28287	0	CGCAGCTCAAGTTTCCCTCGCGGAAGCGAGGGAAGCTTGAGCTGCGACACTCTTTCCCTA	16309.2
TDG_TG_f1ACG_f2CTGC_rep_3	15949	27716	27716	0	CGCAGCTCACGTCTGCCTCGCGGAAGCGAGGCAGGCGTGAGCTGCGACACTCTTTCCCTA	15975.9
TDG_TG_f1ATT_f2ACCC_rep_2	17694	31906	31906	0	CGCAGCTCATTTACCCCTCGCGGAAGCGAGGGGTGAATGAGCTGCGACACTCTTTCCCTA	18648.1
TDG_TG_f1TGC_f2TTTC_rep_6	14441	25588	25588	0	CGCAGCTCTGCTTTTCCTCGCGGAAGCGAGGAAAGGCAGAGCTGCGACACTCTTTCCCTA	15014.3
TDG_TG_f1CCT_f2ACGT_rep_5	18125	34952	34952	0	CGCAGCTCCCTTACGTCTCGCGGAAGCGAGACGTGAGGGAGCTGCGACACTCTTTCCCTA	20430.5
TDG_TG_f1ATA_f2AGGT_rep_10	15548	31740	31740	0	CGCAGCTCATATAGGTCTCGCGGAAGCGAGACCTGTATGAGCTGCGACACTCTTTCCCTA	18626
TDG_TG_f1GAC_f2AAAT_rep_4	15263	26752	26752	0	CGCAGCTCGACTAAATCTCGCGGAAGCGAGATTTGGTCGAGCTGCGACACTCTTTCCCTA	15774.1
TDG_TG_f1TTC_f2CGTT_rep_10	12927	26377	26377	0	CGCAGCTCTTCTCGTTCTCGCGGAAGCGAGAACGGGAAGAGCTGCGACACTCTTTCCCTA	15696.2
TDG_TG_f1TTA_f2GCAT_rep_3	26612	49645	49645	0	CGCAGCTCTTATGCATCTCGCGGAAGCGAGATGCGTAAGAGCTGCGACACTCTTTCCCTA	29755.8
TDG_TG_f1AAC_f2TCCG_rep_1	15090	26284	26284	0	CGCAGCTCAACTTCCGCTCGCGGAAGCGAGCGGAGGTTGAGCTGCGACACTCTTTCCCTA	15958.2
TDG_TG_f1ACG_f2TCGT_rep_3	14606	27658	27658	0	CGCAGCTCACGTTCGTCTCGCGGAAGCGAGACGAGCGTGAGCTGCGACACTCTTTCCCTA	16849.9
TDG_TG_f1CTT_f2ATAC_rep_10	17036	31490	31490	0	CGCAGCTCCTTTATACCTCGCGGAAGCGAGGTATGAAGGAGCTGCGACACTCTTTCCCTA	19119
TDG_TG_f1CAA_f2AAAA_rep_8	13705	27051	27051	0	CGCAGCTCCAATAAAACTCGCGGAAGCGAGTTTTGTTGGAGCTGCGACACTCTTTCCCTA	16437.7
TDG_TG_f1AGG_f2GTTT_rep_8	24993	49482	49482	0	CGCAGCTCAGGTGTTTCTCGCGGAAGCGAGAAACGCCTGAGCTGCGACACTCTTTCCCTA	30454.5
TDG_TG_f1GTA_f2ATAG_rep_1	14816	24402	24402	0	CGCAGCTCGTATATAGCTCGCGGAAGCGAGCTATGTACGAGCTGCGACACTCTTTCCCTA	15140.6
TDG_TG_f1ATA_f2GCAG_rep_2	26375	48509	48509	0	CGCAGCTCATATGCAGCTCGCGGAAGCGAGCTGCGTATGAGCTGCGACACTCTTTCCCTA	30119
TDG_TG_f1AGG_f2TGTA_rep_1	11950	24095	24095	0	CGCAGCTCAGGTTGTACTCGCGGAAGCGAGTACAGCCTGAGCTGCGACACTCTTTCCCTA	15139.7
TDG_TG_f1CAT_f2GTGC_rep_3	23541	43280	43280	0	CGCAGCTCCATTGTGCCTCGCGGAAGCGAGGCACGATGGAGCTGCGACACTCTTTCCCTA	27687.5
TDG_TG_f1CTG_f2CTTC_rep_1	12514	25684	25684	0	CGCAGCTCCTGTCTTCCTCGCGGAAGCGAGGAAGGCAGGAGCTGCGACACTCTTTCCCTA	16432.1
TDG_TG_f1AAG_f2GAGG_rep_1	26909	47964	47964	0	CGCAGCTCAAGTGAGGCTCGCGGAAGCGAGCCTCGCTTGAGCTGCGACACTCTTTCCCTA	30492.9
TDG_TG_f1CCC_f2GAGG_rep_1	21221	32006	32006	0	CGCAGCTCCCCTGAGGCTCGCGGAAGCGAGCCTCGGGGGAGCTGCGACACTCTTTCCCTA	20167
TDG_TG_f1TCG_f2GACT_rep_1	19688	40565	40565	0	CGCAGCTCTCGTGACTCTCGCGGAAGCGAGAGTCGCGAGAGCTGCGACACTCTTTCCCTA	25468.5
TDG_TG_f1AGG_f2TTTC_rep_5	12603	23599	23599	0	CGCAGCTCAGGTTTTCCTCGCGGAAGCGAGGAAAGCCTGAGCTGCGACACTCTTTCCCTA	14538.3
TDG_TG_f1GTC_f2TCCG_rep_8	15900	27671	27671	0	CGCAGCTCGTCTTCCGCTCGCGGAAGCGAGCGGAGGACGAGCTGCGACACTCTTTCCCTA	16904.1
TDG_TG_f1CGT_f2CCTC_rep_10	13529	27859	27859	0	CGCAGCTCCGTTCCTCCTCGCGGAAGCGAGGAGGGACGGAGCTGCGACACTCTTTCCCTA	17085.9
TDG_TG_f1CAT_f2GAGA_rep_3	23582	46193	46193	0	CGCAGCTCCATTGAGACTCGCGGAAGCGAGTCTCGATGGAGCTGCGACACTCTTTCCCTA	28312.8
TDG_TG_f1TCA_f2AATA_rep_8	15020	24710	24710	0	CGCAGCTCTCATAATACTCGCGGAAGCGAGTATTGTGAGAGCTGCGACACTCTTTCCCTA	15085.5
dBr_6539	15901	31363	31363	0	CGCATGGTAAAACGAACACGCGGAAGCGTGTTCGTTTTACCATGCGACACTCTTTCCCTA	19147.2
TDG_TG_f1GAC_f2CCTC_rep_10	15339	29415	29415	0	CGCAGCTCGACTCCTCCTCGCGGAAGCGAGGAGGGGTCGAGCTGCGACACTCTTTCCCTA	17909.7
TDG_TG_f1AAG_f2GCGG_rep_9	34331	59525	67647	0	CGCAGCTCAAGTGCGGCTCGCGGAAGCGAGCCGCGCTTGAGCTGCGACACTCTTTCCCTA	41081.8
TDG_TG_f1CCA_f2AAGA_rep_1	15448	32424	32424	0	CGCAGCTCCCATAAGACTCGCGGAAGCGAGTCTTGTGGGAGCTGCGACACTCTTTCCCTA	19392.7
TDG_TG_f1GAT_f2CAAA_rep_3	18850	30720	30720	0	CGCAGCTCGATTCAAACTCGCGGAAGCGAGTTTGGATCGAGCTGCGACACTCTTTCCCTA	17997
TDG_TG_f1CCG_f2TGTG_rep_7	16121	26079	26079	0	CGCAGCTCCCGTTGTGCTCGCGGAAGCGAGCACAGCGGGAGCTGCGACACTCTTTCCCTA	15278.1
TDG_TG_f1TAG_f2GGAC_rep_3	28184	61519	55668	0	CGCAGCTCTAGTGGACCTCGCGGAAGCGAGGTCCGCTAGAGCTGCGACACTCTTTCCCTA	32599.1
TDG_TG_f1GTC_f2CACG_rep_5	18098	31975	31975	0	CGCAGCTCGTCTCACGCTCGCGGAAGCGAGCGTGGGACGAGCTGCGACACTCTTTCCCTA	18611
TDG_TG_f1TGA_f2TGGA_rep_4	12387	27854	27854	0	CGCAGCTCTGATTGGACTCGCGGAAGCGAGTCCAGTCAGAGCTGCGACACTCTTTCCCTA	16311.3
TDG_TG_f1AAC_f2TAGT_rep_7	13026	23802	23802	0	CGCAGCTCAACTTAGTCTCGCGGAAGCGAGACTAGGTTGAGCTGCGACACTCTTTCCCTA	14097.2
TDG_TG_f1TAC_f2GCGA_rep_6	27386	47843	47843	0	CGCAGCTCTACTGCGACTCGCGGAAGCGAGTCGCGGTAGAGCTGCGACACTCTTTCCCTA	28144.8
TDG_TG_f1CGT_f2CAAG_rep_6	16333	31707	31707	0	CGCAGCTCCGTTCAAGCTCGCGGAAGCGAGCTTGGACGGAGCTGCGACACTCTTTCCCTA	18455
TDG_TG_f1GCG_f2TCGG_rep_2	16681	29829	29829	0	CGCAGCTCGCGTTCGGCTCGCGGAAGCGAGCCGAGCGCGAGCTGCGACACTCTTTCCCTA	17361.6
TDG_TG_f1AGC_f2ATGA_rep_3	16428	30929	30929	0	CGCAGCTCAGCTATGACTCGCGGAAGCGAGTCATGGCTGAGCTGCGACACTCTTTCCCTA	18119.5
TDG_TG_f1GAA_f2CTCT_rep_9	13708	28031	28031	0	CGCAGCTCGAATCTCTCTCGCGGAAGCGAGAGAGGTTCGAGCTGCGACACTCTTTCCCTA	16281.4
TDG_TG_f1ACC_f2ACGA_rep_2	17311	31949	31949	0	CGCAGCTCACCTACGACTCGCGGAAGCGAGTCGTGGGTGAGCTGCGACACTCTTTCCCTA	18445.6
TDG_TG_f1CCC_f2GTGC_rep_7	24948	43371	43371	0	CGCAGCTCCCCTGTGCCTCGCGGAAGCGAGGCACGGGGGAGCTGCGACACTCTTTCCCTA	24955.2
TDG_TG_f1TGA_f2TTGC_rep_8	13474	27334	27334	0	CGCAGCTCTGATTTGCCTCGCGGAAGCGAGGCAAGTCAGAGCTGCGACACTCTTTCCCTA	15678.3
TDG_TG_f1GGG_f2CATG_rep_6	14175	27265	27265	0	CGCAGCTCGGGTCATGCTCGCGGAAGCGAGCATGGCCCGAGCTGCGACACTCTTTCCCTA	15591.9
TDG_TG_f1ATC_f2TAAC_rep_3	14367	23871	23871	0	CGCAGCTCATCTTAACCTCGCGGAAGCGAGGTTAGGATGAGCTGCGACACTCTTTCCCTA	13459
TDG_TG_f1ATT_f2ATTA_rep_6	14749	32590	32590	0	CGCAGCTCATTTATTACTCGCGGAAGCGAGTAATGAATGAGCTGCGACACTCTTTCCCTA	18077.3
TDG_TG_f1CAT_f2GCCA_rep_8	29628	44475	44475	0	CGCAGCTCCATTGCCACTCGCGGAAGCGAGTGGCGATGGAGCTGCGACACTCTTTCCCTA	24553.1
TDG_TG_f1TAG_f2GACG_rep_2	31605	57102	62334	0	CGCAGCTCTAGTGACGCTCGCGGAAGCGAGCGTCGCTAGAGCTGCGACACTCTTTCCCTA	33951
TDG_TG_f1ATT_f2TTGG_rep_9	13092	27895	27895	0	CGCAGCTCATTTTTGGCTCGCGGAAGCGAGCCAAGAATGAGCTGCGACACTCTTTCCCTA	14720.5
TDG_TG_f1CCT_f2GAAA_rep_8	24147	43778	43778	0	CGCAGCTCCCTTGAAACTCGCGGAAGCGAGTTTCGAGGGAGCTGCGACACTCTTTCCCTA	22779.6
TDG_TG_f1GCA_f2TAGA_rep_4	15592	30797	30797	0	CGCAGCTCGCATTAGACTCGCGGAAGCGAGTCTAGTGCGAGCTGCGACACTCTTTCCCTA	16025
TDG_TG_f1AAC_f2CTAA_rep_8	12841	32940	32940	0	CGCAGCTCAACTCTAACTCGCGGAAGCGAGTTAGGGTTGAGCTGCGACACTCTTTCCCTA	17152.7
TDG_TG_f1TGA_f2CTCT_rep_6	14071	23284	23284	0	CGCAGCTCTGATCTCTCTCGCGGAAGCGAGAGAGGTCAGAGCTGCGACACTCTTTCCCTA	12134.6
dBr_6755	19860	35632	35632	0	CGCATGCCGGACGGCGCTCGCGGAAGCGAGCGCCGTCCGGCATGCGACACTCTTTCCCTA	18568.1
TDG_TG_f1ACT_f2AGGC_rep_9	19500	44318	44318	0	CGCAGCTCACTTAGGCCTCGCGGAAGCGAGGCCTGAGTGAGCTGCGACACTCTTTCCCTA	23178
TDG_TG_f1TAA_f2CCTC_rep_5	12812	24092	24092	0	CGCAGCTCTAATCCTCCTCGCGGAAGCGAGGAGGGTTAGAGCTGCGACACTCTTTCCCTA	12584.3
TDG_TG_f1AAC_f2AATG_rep_7	18130	37323	37323	0	CGCAGCTCAACTAATGCTCGCGGAAGCGAGCATTGGTTGAGCTGCGACACTCTTTCCCTA	19544
TDG_TG_f1TAC_f2TGAC_rep_7	13687	33097	33097	0	CGCAGCTCTACTTGACCTCGCGGAAGCGAGGTCAGGTAGAGCTGCGACACTCTTTCCCTA	17515.6
TDG_TG_f1AAT_f2CGTG_rep_8	16845	32540	32540	0	CGCAGCTCAATTCGTGCTCGCGGAAGCGAGCACGGATTGAGCTGCGACACTCTTTCCCTA	17183.7
TDG_TG_f1TTC_f2GGGA_rep_7	20477	44882	44882	0	CGCAGCTCTTCTGGGACTCGCGGAAGCGAGTCCCGGAAGAGCTGCGACACTCTTTCCCTA	24127.4
TDG_TG_f1ATG_f2GCTA_rep_8	30376	59930	59939	0	CGCAGCTCATGTGCTACTCGCGGAAGCGAGTAGCGCATGAGCTGCGACACTCTTTCCCTA	32617.2
TDG_TG_f1GAT_f2CGCG_rep_4	20303	40537	40537	0	CGCAGCTCGATTCGCGCTCGCGGAAGCGAGCGCGGATCGAGCTGCGACACTCTTTCCCTA	22382
TDG_TG_f1ATT_f2TATC_rep_6	14888	28440	28440	0	CGCAGCTCATTTTATCCTCGCGGAAGCGAGGATAGAATGAGCTGCGACACTCTTTCCCTA	15749.9
TDG_TG_f1CAT_f2TTCA_rep_8	16211	33204	33204	0	CGCAGCTCCATTTTCACTCGCGGAAGCGAGTGAAGATGGAGCTGCGACACTCTTTCCCTA	18463.3
TDG_TG_f1ATA_f2GGGA_rep_5	21904	45961	45961	0	CGCAGCTCATATGGGACTCGCGGAAGCGAGTCCCGTATGAGCTGCGACACTCTTTCCCTA	25943.1
TDG_TG_f1GGT_f2TAGG_rep_3	14806	30891	30891	0	CGCAGCTCGGTTTAGGCTCGCGGAAGCGAGCCTAGACCGAGCTGCGACACTCTTTCCCTA	17571.5
TDG_TG_f1TCG_f2CAAC_rep_10	13140	26034	26034	0	CGCAGCTCTCGTCAACCTCGCGGAAGCGAGGTTGGCGAGAGCTGCGACACTCTTTCCCTA	14765.7
TDG_TG_f1TGC_f2CCGT_rep_8	14459	28513	28513	0	CGCAGCTCTGCTCCGTCTCGCGGAAGCGAGACGGGGCAGAGCTGCGACACTCTTTCCCTA	16225.9
TDG_TG_f1CCG_f2CTCA_rep_3	13747	29951	29951	0	CGCAGCTCCCGTCTCACTCGCGGAAGCGAGTGAGGCGGGAGCTGCGACACTCTTTCCCTA	17158.6
TDG_TG_f1TGT_f2GCAT_rep_4	23070	45657	45657	0	CGCAGCTCTGTTGCATCTCGCGGAAGCGAGATGCGACAGAGCTGCGACACTCTTTCCCTA	26261.7
TDG_TG_f1ATC_f2TGTT_rep_10	13349	25817	25817	0	CGCAGCTCATCTTGTTCTCGCGGAAGCGAGAACAGGATGAGCTGCGACACTCTTTCCCTA	14865.9
TDG_TG_f1CGG_f2TGTA_rep_9	13808	30821	30821	0	CGCAGCTCCGGTTGTACTCGCGGAAGCGAGTACAGCCGGAGCTGCGACACTCTTTCCCTA	17671.6
TDG_TG_f1ATA_f2GCGA_rep_7	24257	46688	46688	0	CGCAGCTCATATGCGACTCGCGGAAGCGAGTCGCGTATGAGCTGCGACACTCTTTCCCTA	26769.1
TDG_TG_f1CTC_f2GACA_rep_1	22297	43798	43798	0	CGCAGCTCCTCTGACACTCGCGGAAGCGAGTGTCGGAGGAGCTGCGACACTCTTTCCCTA	25219.7
TDG_TG_f1GGG_f2ACTG_rep_2	16354	34701	34701	0	CGCAGCTCGGGTACTGCTCGCGGAAGCGAGCAGTGCCCGAGCTGCGACACTCTTTCCCTA	19981.5
TDG_TG_f1TGT_f2CGAT_rep_1	16641	25245	25245	0	CGCAGCTCTGTTCGATCTCGCGGAAGCGAGATCGGACAGAGCTGCGACACTCTTTCCCTA	14630.7
TDG_TG_f1TGC_f2GGTT_rep_7	21387	40650	40650	0	CGCAGCTCTGCTGGTTCTCGCGGAAGCGAGAACCGGCAGAGCTGCGACACTCTTTCCCTA	23558.6
TDG_TG_f1CGT_f2GCAC_rep_1	26108	50761	51622	0	CGCAGCTCCGTTGCACCTCGCGGAAGCGAGGTGCGACGGAGCTGCGACACTCTTTCCCTA	30080.5
TDG_TG_f1TCA_f2TAGT_rep_9	12266	24717	24717	0	CGCAGCTCTCATTAGTCTCGCGGAAGCGAGACTAGTGAGAGCTGCGACACTCTTTCCCTA	14201.2
TDG_TG_f1GTG_f2ACTT_rep_5	15349	32232	32232	0	CGCAGCTCGTGTACTTCTCGCGGAAGCGAGAAGTGCACGAGCTGCGACACTCTTTCCCTA	18246.4
TDG_TG_f1CTC_f2GAGC_rep_6	19617	40238	40238	0	CGCAGCTCCTCTGAGCCTCGCGGAAGCGAGGCTCGGAGGAGCTGCGACACTCTTTCCCTA	22530.9
TDG_TG_f1TAT_f2AATA_rep_5	17297	30876	30876	0	CGCAGCTCTATTAATACTCGCGGAAGCGAGTATTGATAGAGCTGCGACACTCTTTCCCTA	17450.3
TDG_TG_f1GAT_f2GCTA_rep_1	25824	54678	51069	0	CGCAGCTCGATTGCTACTCGCGGAAGCGAGTAGCGATCGAGCTGCGACACTCTTTCCCTA	28687.8
TDG_TG_f1CAC_f2TGGG_rep_1	13840	24826	24826	0	CGCAGCTCCACTTGGGCTCGCGGAAGCGAGCCCAGGTGGAGCTGCGACACTCTTTCCCTA	13945.9
TDG_TG_f1GGC_f2AATG_rep_4	16978	31266	31266	0	CGCAGCTCGGCTAATGCTCGCGGAAGCGAGCATTGGCCGAGCTGCGACACTCTTTCCCTA	17563.5
TDG_TG_f1GTC_f2AGTG_rep_10	16120	31835	31835	0	CGCAGCTCGTCTAGTGCTCGCGGAAGCGAGCACTGGACGAGCTGCGACACTCTTTCCCTA	17941
TDG_TG_f1GGC_f2CCTA_rep_6	12808	25246	25246	0	CGCAGCTCGGCTCCTACTCGCGGAAGCGAGTAGGGGCCGAGCTGCGACACTCTTTCCCTA	14353.8
dBr_6647	15126	27632	27632	0	CGCTATGCGCCCAGTATCCGCGGAAGCGGATACTGGGCGCATAGCGACACTCTTTCCCTA	15703.5
TDG_TG_f1TAA_f2ATAG_rep_8	13275	28268	28268	0	CGCAGCTCTAATATAGCTCGCGGAAGCGAGCTATGTTAGAGCTGCGACACTCTTTCCCTA	16008.8
TDG_TG_f1GGT_f2ACGC_rep_6	16045	29645	29645	0	CGCAGCTCGGTTACGCCTCGCGGAAGCGAGGCGTGACCGAGCTGCGACACTCTTTCCCTA	16771.6
TDG_TG_f1GCG_f2CTAT_rep_4	12739	24581	24581	0	CGCAGCTCGCGTCTATCTCGCGGAAGCGAGATAGGCGCGAGCTGCGACACTCTTTCCCTA	13736.5
TDG_TG_f1AAC_f2AATC_rep_3	13183	27618	27618	0	CGCAGCTCAACTAATCCTCGCGGAAGCGAGGATTGGTTGAGCTGCGACACTCTTTCCCTA	15401
TDG_TG_f1AAG_f2TTAA_rep_4	10148	19542	19542	0	CGCAGCTCAAGTTTAACTCGCGGAAGCGAGTTAAGCTTGAGCTGCGACACTCTTTCCCTA	11204.4
TDG_TG_f1AGG_f2CCGT_rep_9	12615	22545	22545	0	CGCAGCTCAGGTCCGTCTCGCGGAAGCGAGACGGGCCTGAGCTGCGACACTCTTTCCCTA	13353.2
TDG_TG_f1GAC_f2TATA_rep_6	10935	23095	23095	0	CGCAGCTCGACTTATACTCGCGGAAGCGAGTATAGGTCGAGCTGCGACACTCTTTCCCTA	13688
TDG_TG_f1TAA_f2GGCG_rep_8	19355	34477	34477	0	CGCAGCTCTAATGGCGCTCGCGGAAGCGAGCGCCGTTAGAGCTGCGACACTCTTTCCCTA	20468.9
TDG_TG_f1GCG_f2GTCA_rep_10	22685	44943	44943	0	CGCAGCTCGCGTGTCACTCGCGGAAGCGAGTGACGCGCGAGCTGCGACACTCTTTCCCTA	27082.3
TDG_TG_f1CTA_f2CTCC_rep_7	10081	17835	17835	0	CGCAGCTCCTATCTCCCTCGCGGAAGCGAGGGAGGTAGGAGCTGCGACACTCTTTCCCTA	11078.1
TDG_TG_f1TAA_f2CTTC_rep_1	8061	16440	16440	0	CGCAGCTCTAATCTTCCTCGCGGAAGCGAGGAAGGTTAGAGCTGCGACACTCTTTCCCTA	10353.9
TDG_TG_f1GTA_f2AGAT_rep_4	11992	25207	25207	0	CGCAGCTCGTATAGATCTCGCGGAAGCGAGATCTGTACGAGCTGCGACACTCTTTCCCTA	16360.9
dBr_3815	11252	22495	22495	0	CGCAGGCCGTACGAGGCTCGCGGAAGCGAGCCTCGTACGGCCTGCGACACTCTTTCCCTA	15053.3
TDG_TG_f1AAT_f2TGGC_rep_6	8659	16752	16752	0	CGCAGCTCAATTTGGCCTCGCGGAAGCGAGGCCAGATTGAGCTGCGACACTCTTTCCCTA	11266.8
TDG_TG_f1CAA_f2AATC_rep_2	10057	20114	20114	0	CGCAGCTCCAATAATCCTCGCGGAAGCGAGGATTGTTGGAGCTGCGACACTCTTTCCCTA	13758.5
TDG_TG_f1CAA_f2TCAG_rep_6	7951	16878	16878	0	CGCAGCTCCAATTCAGCTCGCGGAAGCGAGCTGAGTTGGAGCTGCGACACTCTTTCCCTA	11861
TDG_TG_f1ACG_f2TATC_rep_8	8161	15368	15368	0	CGCAGCTCACGTTATCCTCGCGGAAGCGAGGATAGCGTGAGCTGCGACACTCTTTCCCTA	11064
dBr_4516	11676	22165	22165	0	CGCAGGTCAAAGCGGATGCGCGGAAGCGCATCCGCTTTGACCTGCGACACTCTTTCCCTA	16247.5
TDG_TG_f1GCA_f2CGCA_rep_7	10181	19808	19808	0	CGCAGCTCGCATCGCACTCGCGGAAGCGAGTGCGGTGCGAGCTGCGACACTCTTTCCCTA	14616.8
TDG_TG_f1TCC_f2ATAC_rep_1	10594	23050	23050	0	CGCAGCTCTCCTATACCTCGCGGAAGCGAGGTATGGGAGAGCTGCGACACTCTTTCCCTA	17182.2
TDG_TG_f1GTG_f2GAGA_rep_4	19102	35809	35809	0	CGCAGCTCGTGTGAGACTCGCGGAAGCGAGTCTCGCACGAGCTGCGACACTCTTTCCCTA	27231.2
dBr_6495	9353	17057	17057	0	CGCGATCTGGATAGGCGTCGCGGAAGCGACGCCTATCCAGATCGCGACACTCTTTCCCTA	13077
TDG_TG_f1ACA_f2CTCG_rep_8	9211	17621	17621	0	CGCAGCTCACATCTCGCTCGCGGAAGCGAGCGAGGTGTGAGCTGCGACACTCTTTCCCTA	13652.9
TDG_TG_f1GGG_f2CGCG_rep_10	11158	22629	22629	0	CGCAGCTCGGGTCGCGCTCGCGGAAGCGAGCGCGGCCCGAGCTGCGACACTCTTTCCCTA	17885.4
TDG_TG_f1TTT_f2AGGA_rep_8	9213	19729	19729	0	CGCAGCTCTTTTAGGACTCGCGGAAGCGAGTCCTGAAAGAGCTGCGACACTCTTTCCCTA	15911.5
TDG_TG_f1GGT_f2GGTG_rep_4	17939	37421	37421	0	CGCAGCTCGGTTGGTGCTCGCGGAAGCGAGCACCGACCGAGCTGCGACACTCTTTCCCTA	30913.5
TDG_TG_f1AGC_f2CTAG_rep_5	7031	14258	14258	0	CGCAGCTCAGCTCTAGCTCGCGGAAGCGAGCTAGGGCTGAGCTGCGACACTCTTTCCCTA	12221.3
TDG_TG_f1GAG_f2TATA_rep_2	7433	16123	16123	0	CGCAGCTCGAGTTATACTCGCGGAAGCGAGTATAGCTCGAGCTGCGACACTCTTTCCCTA	13964.3
TDG_TG_f1ACT_f2TTCT_rep_4	8386	14654	14654	0	CGCAGCTCACTTTTCTCTCGCGGAAGCGAGAGAAGAGTGAGCTGCGACACTCTTTCCCTA	12822
TDG_TG_f1GTG_f2GATT_rep_3	20320	35438	35438	0	CGCAGCTCGTGTGATTCTCGCGGAAGCGAGAATCGCACGAGCTGCGACACTCTTTCCCTA	31109.4
TDG_TG_f1ATC_f2TAAC_rep_1	7140	16452	16452	0	CGCAGCTCATCTTAACCTCGCGGAAGCGAGGTTAGGATGAGCTGCGACACTCTTTCCCTA	14646.7
TDG_TG_f1TCA_f2CTTC_rep_3	6059	13538	13538	0	CGCAGCTCTCATCTTCCTCGCGGAAGCGAGGAAGGTGAGAGCTGCGACACTCTTTCCCTA	12130.6
TDG_TG_f1CCA_f2GTTA_rep_4	14706	27794	27794	0	CGCAGCTCCCATGTTACTCGCGGAAGCGAGTAACGTGGGAGCTGCGACACTCTTTCCCTA	25175.3
dBr_6139	9222	17567	17567	0	CGCGTTGGCGCTTAATCACGCGGAAGCGTGATTAAGCGCCAACGCGACACTCTTTCCCTA	16411.3
TDG_TG_f1CCA_f2GGCC_rep_10	14744	24477	24477	0	CGCAGCTCCCATGGCCCTCGCGGAAGCGAGGGCCGTGGGAGCTGCGACACTCTTTCCCTA	22948.6
TDG_TG_f1TCG_f2GTCC_rep_5	15402	34128	34128	0	CGCAGCTCTCGTGTCCCTCGCGGAAGCGAGGGACGCGAGAGCTGCGACACTCTTTCCCTA	32168.2
TDG_TG_f1TGC_f2CGGC_rep_2	7182	15740	15740	0	CGCAGCTCTGCTCGGCCTCGCGGAAGCGAGGCCGGGCAGAGCTGCGACACTCTTTCCCTA	15109.7
TDG_TG_f1GGT_f2CAAC_rep_5	8378	16338	16338	0	CGCAGCTCGGTTCAACCTCGCGGAAGCGAGGTTGGACCGAGCTGCGACACTCTTTCCCTA	15840.3
TDG_TG_f1AGA_f2TGTG_rep_4	7353	14229	14229	0	CGCAGCTCAGATTGTGCTCGCGGAAGCGAGCACAGTCTGAGCTGCGACACTCTTTCCCTA	13846.9
dBr_0850	8700	17016	17016	0	CGCATGGGTTCGATCCCTCGCGGAAGCGAGGGATCGAACCCATGCGACACTCTTTCCCTA	16549.1
TDG_TG_f1GGG_f2TACC_rep_8	7297	13556	13556	0	CGCAGCTCGGGTTACCCTCGCGGAAGCGAGGGTAGCCCGAGCTGCGACACTCTTTCCCTA	13116.9
TDG_TG_f1CCC_f2CCGT_rep_3	7687	16366	16366	0	CGCAGCTCCCCTCCGTCTCGCGGAAGCGAGACGGGGGGGAGCTGCGACACTCTTTCCCTA	15461.4
dBr_1049	8538	17998	17998	0	CGCAATAGTGCTAGTGCGCGCGGAAGCGCGCACTAGCACTATTGCGACACTCTTTCCCTA	16997
TDG_TG_f1TCC_f2TTTT_rep_8	7291	15109	15109	0	CGCAGCTCTCCTTTTTCTCGCGGAAGCGAGAAAAGGGAGAGCTGCGACACTCTTTCCCTA	14279
TDG_TG_f1AGA_f2CCGT_rep_7	8175	17867	17867	0	CGCAGCTCAGATCCGTCTCGCGGAAGCGAGACGGGTCTGAGCTGCGACACTCTTTCCCTA	17029.4
TDG_TG_f1CCT_f2CCGA_rep_10	7654	15339	15339	0	CGCAGCTCCCTTCCGACTCGCGGAAGCGAGTCGGGAGGGAGCTGCGACACTCTTTCCCTA	14647.8
TDG_TG_f1ATC_f2AGCG_rep_10	12560	23653	23653	0	CGCAGCTCATCTAGCGCTCGCGGAAGCGAGCGCTGGATGAGCTGCGACACTCTTTCCCTA	22337.5
TDG_TG_f1AAC_f2AGTA_rep_3	9266	19586	19586	0	CGCAGCTCAACTAGTACTCGCGGAAGCGAGTACTGGTTGAGCTGCGACACTCTTTCCCTA	18255.3
TDG_TG_f1GCG_f2GTCC_rep_7	17374	36181	36181	0	CGCAGCTCGCGTGTCCCTCGCGGAAGCGAGGGACGCGCGAGCTGCGACACTCTTTCCCTA	33713.5
TDG_TG_f1TTG_f2TTGA_rep_5	6715	14503	14503	0	CGCAGCTCTTGTTTGACTCGCGGAAGCGAGTCAAGCAAGAGCTGCGACACTCTTTCCCTA	13506.9
TDG_TG_f1ATA_f2GCGC_rep_7	18465	35560	35560	0	CGCAGCTCATATGCGCCTCGCGGAAGCGAGGCGCGTATGAGCTGCGACACTCTTTCCCTA	32828
TDG_TG_f1ACC_f2TTTT_rep_7	8333	18445	18445	0	CGCAGCTCACCTTTTTCTCGCGGAAGCGAGAAAAGGGTGAGCTGCGACACTCTTTCCCTA	16751.8
TDG_TG_f1TTG_f2AGTG_rep_10	10810	22164	22164	0	CGCAGCTCTTGTAGTGCTCGCGGAAGCGAGCACTGCAAGAGCTGCGACACTCTTTCCCTA	19891.8
TDG_TG_f1CTC_f2AGGC_rep_3	10300	19797	19797	0	CGCAGCTCCTCTAGGCCTCGCGGAAGCGAGGCCTGGAGGAGCTGCGACACTCTTTCCCTA	17615.4
TDG_TG_f1ATT_f2GTGA_rep_2	13757	28752	28752	0	CGCAGCTCATTTGTGACTCGCGGAAGCGAGTCACGAATGAGCTGCGACACTCTTTCCCTA	25658.8
TDG_TG_f1GGT_f2AAGC_rep_7	9048	19838	19838	0	CGCAGCTCGGTTAAGCCTCGCGGAAGCGAGGCTTGACCGAGCTGCGACACTCTTTCCCTA	17626.1
TDG_TG_f1GAT_f2CTGT_rep_8	9165	17810	17810	0	CGCAGCTCGATTCTGTCTCGCGGAAGCGAGACAGGATCGAGCTGCGACACTCTTTCCCTA	15677.1
TDG_TG_f1ATG_f2AATC_rep_9	11903	24905	24905	0	CGCAGCTCATGTAATCCTCGCGGAAGCGAGGATTGCATGAGCTGCGACACTCTTTCCCTA	21701.5
TDG_TG_f1ATC_f2TATG_rep_9	9548	20148	20148	0	CGCAGCTCATCTTATGCTCGCGGAAGCGAGCATAGGATGAGCTGCGACACTCTTTCCCTA	17298.4
TDG_TG_f1TCG_f2GGGT_rep_8	15072	29191	29191	0	CGCAGCTCTCGTGGGTCTCGCGGAAGCGAGACCCGCGAGAGCTGCGACACTCTTTCCCTA	24840.9
TDG_TG_f1GTC_f2GGAG_rep_7	15114	30385	30385	0	CGCAGCTCGTCTGGAGCTCGCGGAAGCGAGCTCCGGACGAGCTGCGACACTCTTTCCCTA	25248.9
TDG_TG_f1AAC_f2CCTT_rep_7	9302	19023	19023	0	CGCAGCTCAACTCCTTCTCGCGGAAGCGAGAAGGGGTTGAGCTGCGACACTCTTTCCCTA	15679.1
TDG_TG_f1AGT_f2ACGG_rep_5	12392	19288	19288	0	CGCAGCTCAGTTACGGCTCGCGGAAGCGAGCCGTGACTGAGCTGCGACACTCTTTCCCTA	15594.3
TDG_TG_f1GCG_f2GTAC_rep_6	20819	44603	44603	0	CGCAGCTCGCGTGTACCTCGCGGAAGCGAGGTACGCGCGAGCTGCGACACTCTTTCCCTA	35799.1
TDG_TG_f1AAA_f2CTAC_rep_10	9760	17733	17733	0	CGCAGCTCAAATCTACCTCGCGGAAGCGAGGTAGGTTTGAGCTGCGACACTCTTTCCCTA	14074.6
TDG_TG_f1CAC_f2ACAA_rep_5	11681	20829	20829	0	CGCAGCTCCACTACAACTCGCGGAAGCGAGTTGTGGTGGAGCTGCGACACTCTTTCCCTA	16104
TDG_TG_f1TGT_f2CTGG_rep_2	8277	18129	18129	0	CGCAGCTCTGTTCTGGCTCGCGGAAGCGAGCCAGGACAGAGCTGCGACACTCTTTCCCTA	13999.3
TDG_TG_f1TTG_f2TGAC_rep_5	8407	17997	17997	0	CGCAGCTCTTGTTGACCTCGCGGAAGCGAGGTCAGCAAGAGCTGCGACACTCTTTCCCTA	13440.9
TDG_TG_f1GCG_f2CGAA_rep_7	11145	21177	21177	0	CGCAGCTCGCGTCGAACTCGCGGAAGCGAGTTCGGCGCGAGCTGCGACACTCTTTCCCTA	15689.7
TDG_TG_f1TGT_f2CTAT_rep_1	8317	17852	17852	0	CGCAGCTCTGTTCTATCTCGCGGAAGCGAGATAGGACAGAGCTGCGACACTCTTTCCCTA	13162.6
TDG_TG_f1GAG_f2TGTG_rep_10	8845	19127	19127	0	CGCAGCTCGAGTTGTGCTCGCGGAAGCGAGCACAGCTCGAGCTGCGACACTCTTTCCCTA	14059.1
TDG_TG_f1CAC_f2TATT_rep_7	10764	19357	19357	0	CGCAGCTCCACTTATTCTCGCGGAAGCGAGAATAGGTGGAGCTGCGACACTCTTTCCCTA	14066.3
TDG_TG_f1AGC_f2TCAC_rep_6	9340	21575	21575	0	CGCAGCTCAGCTTCACCTCGCGGAAGCGAGGTGAGGCTGAGCTGCGACACTCTTTCCCTA	15496.5
TDG_TG_f1ATG_f2GGAT_rep_7	25967	48798	48798	0	CGCAGCTCATGTGGATCTCGCGGAAGCGAGATCCGCATGAGCTGCGACACTCTTTCCCTA	34657.3
TDG_TG_f1ACC_f2ACGT_rep_7	12128	21491	21491	0	CGCAGCTCACCTACGTCTCGCGGAAGCGAGACGTGGGTGAGCTGCGACACTCTTTCCCTA	15238.5
TDG_TG_f1TGT_f2CTAC_rep_2	9963	21787	21787	0	CGCAGCTCTGTTCTACCTCGCGGAAGCGAGGTAGGACAGAGCTGCGACACTCTTTCCCTA	15385.5
TDG_TG_f1CCT_f2TAAA_rep_3	9479	19351	19351	0	CGCAGCTCCCTTTAAACTCGCGGAAGCGAGTTTAGAGGGAGCTGCGACACTCTTTCCCTA	13584.3
TDG_TG_f1TCT_f2TAGT_rep_1	8400	17624	17624	0	CGCAGCTCTCTTTAGTCTCGCGGAAGCGAGACTAGAGAGAGCTGCGACACTCTTTCCCTA	12471.1
TDG_TG_f1TAA_f2CCCT_rep_2	10256	20700	20700	0	CGCAGCTCTAATCCCTCTCGCGGAAGCGAGAGGGGTTAGAGCTGCGACACTCTTTCCCTA	14517.2
dBr_6853	11514	24986	24986	0	CGCGGAAGGGGTCCTCGACGCGGAAGCGTCGAGGACCCCTTCCGCGACACTCTTTCCCTA	17716.7
TDG_TG_f1TGA_f2GAAA_rep_8	16796	32159	32159	0	CGCAGCTCTGATGAAACTCGCGGAAGCGAGTTTCGTCAGAGCTGCGACACTCTTTCCCTA	22840
TDG_TG_f1GGG_f2AATT_rep_10	12255	25524	25524	0	CGCAGCTCGGGTAATTCTCGCGGAAGCGAGAATTGCCCGAGCTGCGACACTCTTTCCCTA	18098.2
TDG_TG_f1ATG_f2CATG_rep_6	11480	24069	24069	0	CGCAGCTCATGTCATGCTCGCGGAAGCGAGCATGGCATGAGCTGCGACACTCTTTCCCTA	17181.2
TDG_TG_f1ATA_f2GTGA_rep_9	22236	43303	43303	0	CGCAGCTCATATGTGACTCGCGGAAGCGAGTCACGTATGAGCTGCGACACTCTTTCCCTA	30911
TDG_TG_f1GAT_f2CGGG_rep_9	13113	25507	25507	0	CGCAGCTCGATTCGGGCTCGCGGAAGCGAGCCCGGATCGAGCTGCGACACTCTTTCCCTA	18447.8
TDG_TG_f1TTT_f2ATGT_rep_9	11998	21058	21058	0	CGCAGCTCTTTTATGTCTCGCGGAAGCGAGACATGAAAGAGCTGCGACACTCTTTCCCTA	15391.6
TDG_TG_f1CAC_f2AGCC_rep_5	14956	29860	29860	0	CGCAGCTCCACTAGCCCTCGCGGAAGCGAGGGCTGGTGGAGCTGCGACACTCTTTCCCTA	22260.6
TDG_TG_f1GGT_f2GCTA_rep_2	19740	38762	38762	0	CGCAGCTCGGTTGCTACTCGCGGAAGCGAGTAGCGACCGAGCTGCGACACTCTTTCCCTA	29266.1
TDG_TG_f1CGC_f2GCTA_rep_3	20478	36127	36127	0	CGCAGCTCCGCTGCTACTCGCGGAAGCGAGTAGCGGCGGAGCTGCGACACTCTTTCCCTA	27228.8
TDG_TG_f1GGC_f2TTCC_rep_8	11016	22686	22686	0	CGCAGCTCGGCTTTCCCTCGCGGAAGCGAGGGAAGGCCGAGCTGCGACACTCTTTCCCTA	17132.9
TDG_TG_random_5TG_3_rep_6	14758	26674	26674	0	CGCATCCGCTTGTGTTAACGCGGAAGCGTTGGCGCGAGCGGGTGCGACACTCTTTCCCTA	20167.2
TDG_TG_f1TCA_f2AGGT_rep_7	11622	21022	21022	0	CGCAGCTCTCATAGGTCTCGCGGAAGCGAGACCTGTGAGAGCTGCGACACTCTTTCCCTA	15835.4
TDG_TG_f1AGC_f2CAAT_rep_9	9671	19584	19584	0	CGCAGCTCAGCTCAATCTCGCGGAAGCGAGATTGGGCTGAGCTGCGACACTCTTTCCCTA	14918.2
TDG_TG_f1GTA_f2ACTC_rep_10	12061	24044	24044	0	CGCAGCTCGTATACTCCTCGCGGAAGCGAGGAGTGTACGAGCTGCGACACTCTTTCCCTA	18121.5
TDG_TG_f1GTA_f2AACG_rep_4	14003	25586	25586	0	CGCAGCTCGTATAACGCTCGCGGAAGCGAGCGTTGTACGAGCTGCGACACTCTTTCCCTA	19270
TDG_TG_f1GTA_f2CTGC_rep_3	10225	20651	20651	0	CGCAGCTCGTATCTGCCTCGCGGAAGCGAGGCAGGTACGAGCTGCGACACTCTTTCCCTA	15472.3
TDG_TG_f1TCT_f2TTCG_rep_2	11117	20773	20773	0	CGCAGCTCTCTTTTCGCTCGCGGAAGCGAGCGAAGAGAGAGCTGCGACACTCTTTCCCTA	15149.7
TDG_TG_f1GGG_f2ATCA_rep_8	15732	31814	31814	0	CGCAGCTCGGGTATCACTCGCGGAAGCGAGTGATGCCCGAGCTGCGACACTCTTTCCCTA	22769.1
TDG_TG_f1ACT_f2AACT_rep_5	14327	29045	29045	0	CGCAGCTCACTTAACTCTCGCGGAAGCGAGAGTTGAGTGAGCTGCGACACTCTTTCCCTA	20231.9
TDG_TG_f1TAA_f2GTTT_rep_8	14667	30976	30976	0	CGCAGCTCTAATGTTTCTCGCGGAAGCGAGAAACGTTAGAGCTGCGACACTCTTTCCCTA	20198.3
TDG_TG_f1TTG_f2TCGA_rep_9	11525	22508	22508	0	CGCAGCTCTTGTTCGACTCGCGGAAGCGAGTCGAGCAAGAGCTGCGACACTCTTTCCCTA	14391.7
TDG_TG_f1ACG_f2GGGC_rep_1	20369	42059	42059	0	CGCAGCTCACGTGGGCCTCGCGGAAGCGAGGCCCGCGTGAGCTGCGACACTCTTTCCCTA	26874.6
TDG_TG_f1AAC_f2CAGA_rep_5	11322	23491	23491	0	CGCAGCTCAACTCAGACTCGCGGAAGCGAGTCTGGGTTGAGCTGCGACACTCTTTCCCTA	14907.6
TDG_TG_f1TAC_f2AAAT_rep_3	13160	25126	25126	0	CGCAGCTCTACTAAATCTCGCGGAAGCGAGATTTGGTAGAGCTGCGACACTCTTTCCCTA	15945.1
TDG_TG_f1TGG_f2TTTT_rep_9	10304	19467	19467	0	CGCAGCTCTGGTTTTTCTCGCGGAAGCGAGAAAAGCCAGAGCTGCGACACTCTTTCCCTA	12290.6
TDG_TG_f1GGC_f2CAAC_rep_7	12202	28833	28833	0	CGCAGCTCGGCTCAACCTCGCGGAAGCGAGGTTGGGCCGAGCTGCGACACTCTTTCCCTA	18062.6
TDG_TG_f1AAG_f2ATAA_rep_4	16300	32217	32217	0	CGCAGCTCAAGTATAACTCGCGGAAGCGAGTTATGCTTGAGCTGCGACACTCTTTCCCTA	20165.8
TDG_TG_f1GTG_f2CTGA_rep_4	13123	24907	24907	0	CGCAGCTCGTGTCTGACTCGCGGAAGCGAGTCAGGCACGAGCTGCGACACTCTTTCCCTA	15481.6
TDG_TG_f1AGA_f2TTAA_rep_3	10378	23325	23325	0	CGCAGCTCAGATTTAACTCGCGGAAGCGAGTTAAGTCTGAGCTGCGACACTCTTTCCCTA	14228.7
TDG_TG_f1ACT_f2CACC_rep_4	14257	27132	27132	0	CGCAGCTCACTTCACCCTCGCGGAAGCGAGGGTGGAGTGAGCTGCGACACTCTTTCCCTA	16707.6
TDG_TG_f1ACA_f2CGGT_rep_9	13578	26316	26316	0	CGCAGCTCACATCGGTCTCGCGGAAGCGAGACCGGTGTGAGCTGCGACACTCTTTCCCTA	16232.1
TDG_TG_f1TAC_f2TGGC_rep_1	13423	24726	24726	0	CGCAGCTCTACTTGGCCTCGCGGAAGCGAGGCCAGGTAGAGCTGCGACACTCTTTCCCTA	15464.1
TDG_TG_f1AAT_f2CACA_rep_9	13575	26558	26558	0	CGCAGCTCAATTCACACTCGCGGAAGCGAGTGTGGATTGAGCTGCGACACTCTTTCCCTA	16516.6
TDG_TG_f1CGG_f2TGCC_rep_7	13707	25222	25222	0	CGCAGCTCCGGTTGCCCTCGCGGAAGCGAGGGCAGCCGGAGCTGCGACACTCTTTCCCTA	15788.2
TDG_TG_f1CGC_f2TAGC_rep_1	12804	25275	25275	0	CGCAGCTCCGCTTAGCCTCGCGGAAGCGAGGCTAGGCGGAGCTGCGACACTCTTTCCCTA	15904
TDG_TG_f1CGA_f2CATG_rep_5	12528	26671	26671	0	CGCAGCTCCGATCATGCTCGCGGAAGCGAGCATGGTCGGAGCTGCGACACTCTTTCCCTA	16979.8
TDG_TG_f1CAA_f2ATAC_rep_5	14783	29435	29435	0	CGCAGCTCCAATATACCTCGCGGAAGCGAGGTATGTTGGAGCTGCGACACTCTTTCCCTA	18655.6
TDG_TG_f1CGT_f2AGCG_rep_10	17839	35256	35256	0	CGCAGCTCCGTTAGCGCTCGCGGAAGCGAGCGCTGACGGAGCTGCGACACTCTTTCCCTA	22344.9
TDG_TG_f1CTT_f2TCTC_rep_10	10624	19332	19332	0	CGCAGCTCCTTTTCTCCTCGCGGAAGCGAGGAGAGAAGGAGCTGCGACACTCTTTCCCTA	12334.5
TDG_TG_f1GCA_f2TCTC_rep_8	12161	22653	22653	0	CGCAGCTCGCATTCTCCTCGCGGAAGCGAGGAGAGTGCGAGCTGCGACACTCTTTCCCTA	14497.8
TDG_TG_f1ATT_f2CCTG_rep_2	11753	21773	21773	0	CGCAGCTCATTTCCTGCTCGCGGAAGCGAGCAGGGAATGAGCTGCGACACTCTTTCCCTA	14047.8
TDG_TG_f1ATT_f2CAAT_rep_9	11761	22609	22609	0	CGCAGCTCATTTCAATCTCGCGGAAGCGAGATTGGAATGAGCTGCGACACTCTTTCCCTA	14613.3
TDG_TG_f1GCT_f2AGGG_rep_7	13811	30509	30509	0	CGCAGCTCGCTTAGGGCTCGCGGAAGCGAGCCCTGAGCGAGCTGCGACACTCTTTCCCTA	19990.8
TDG_TG_f1TCC_f2GGGA_rep_2	16276	31055	31055	0	CGCAGCTCTCCTGGGACTCGCGGAAGCGAGTCCCGGGAGAGCTGCGACACTCTTTCCCTA	20266.9
TDG_TG_f1GCT_f2GTAT_rep_8	21452	36910	36910	0	CGCAGCTCGCTTGTATCTCGCGGAAGCGAGATACGAGCGAGCTGCGACACTCTTTCCCTA	24088
TDG_TG_f1ACA_f2CCTA_rep_3	10704	22133	22133	0	CGCAGCTCACATCCTACTCGCGGAAGCGAGTAGGGTGTGAGCTGCGACACTCTTTCCCTA	14499.7
TDG_TG_f1AGG_f2AAGG_rep_1	14676	25916	25916	0	CGCAGCTCAGGTAAGGCTCGCGGAAGCGAGCCTTGCCTGAGCTGCGACACTCTTTCCCTA	16864.9
dBr_3338	14736	28343	28343	0	CGCAACGGTTCCATAACCCGCGGAAGCGGGTTATGGAACCGTTGCGACACTCTTTCCCTA	18284
TDG_TG_f1ATC_f2GTAG_rep_4	22481	45225	45225	0	CGCAGCTCATCTGTAGCTCGCGGAAGCGAGCTACGGATGAGCTGCGACACTCTTTCCCTA	29167.8
TDG_TG_f1CTT_f2AAAT_rep_9	11116	21741	21741	0	CGCAGCTCCTTTAAATCTCGCGGAAGCGAGATTTGAAGGAGCTGCGACACTCTTTCCCTA	13904.2
TDG_TG_f1AAT_f2GCAC_rep_10	23175	38188	38188	0	CGCAGCTCAATTGCACCTCGCGGAAGCGAGGTGCGATTGAGCTGCGACACTCTTTCCCTA	24422.7
TDG_TG_f1GCT_f2TTCT_rep_4	10244	22690	22690	0	CGCAGCTCGCTTTTCTCTCGCGGAAGCGAGAGAAGAGCGAGCTGCGACACTCTTTCCCTA	14511.1
TDG_TG_f1TGG_f2ATCA_rep_9	16262	29571	29571	0	CGCAGCTCTGGTATCACTCGCGGAAGCGAGTGATGCCAGAGCTGCGACACTCTTTCCCTA	18636.9
TDG_TG_f1CGA_f2AACG_rep_3	14664	26871	26871	0	CGCAGCTCCGATAACGCTCGCGGAAGCGAGCGTTGTCGGAGCTGCGACACTCTTTCCCTA	16656.7
TDG_TG_f1CTC_f2GGCG_rep_1	18737	39604	39604	0	CGCAGCTCCTCTGGCGCTCGCGGAAGCGAGCGCCGGAGGAGCTGCGACACTCTTTCCCTA	24702.3
TDG_TG_f1CCT_f2TTAG_rep_8	10488	20119	20119	0	CGCAGCTCCCTTTTAGCTCGCGGAAGCGAGCTAAGAGGGAGCTGCGACACTCTTTCCCTA	12361.3
TDG_TG_f1TTT_f2TCTA_rep_6	10027	17132	17132	0	CGCAGCTCTTTTTCTACTCGCGGAAGCGAGTAGAGAAAGAGCTGCGACACTCTTTCCCTA	10516
TDG_TG_f1CGG_f2CTTG_rep_9	11378	24319	24319	0	CGCAGCTCCGGTCTTGCTCGCGGAAGCGAGCAAGGCCGGAGCTGCGACACTCTTTCCCTA	14734.1
TDG_TG_f1CGA_f2CGGC_rep_3	13043	24684	24684	0	CGCAGCTCCGATCGGCCTCGCGGAAGCGAGGCCGGTCGGAGCTGCGACACTCTTTCCCTA	15151.5
TDG_TG_f1GAG_f2GAGT_rep_8	20989	37946	37946	0	CGCAGCTCGAGTGAGTCTCGCGGAAGCGAGACTCGCTCGAGCTGCGACACTCTTTCCCTA	23314.3
TDG_TG_f1CCT_f2AAAG_rep_9	11914	27701	27701	0	CGCAGCTCCCTTAAAGCTCGCGGAAGCGAGCTTTGAGGGAGCTGCGACACTCTTTCCCTA	17019.7
TDG_TG_f1GTC_f2ATCC_rep_3	14443	27645	27645	0	CGCAGCTCGTCTATCCCTCGCGGAAGCGAGGGATGGACGAGCTGCGACACTCTTTCCCTA	17141.5
TDG_TG_f1AAA_f2GCTG_rep_5	18719	33430	33430	0	CGCAGCTCAAATGCTGCTCGCGGAAGCGAGCAGCGTTTGAGCTGCGACACTCTTTCCCTA	21003.6
TDG_TG_f1CCG_f2GGTG_rep_7	21010	41504	41504	0	CGCAGCTCCCGTGGTGCTCGCGGAAGCGAGCACCGCGGGAGCTGCGACACTCTTTCCCTA	26499
TDG_TG_f1CGG_f2GGTA_rep_9	23596	43265	43265	0	CGCAGCTCCGGTGGTACTCGCGGAAGCGAGTACCGCCGGAGCTGCGACACTCTTTCCCTA	27897.4
TDG_TG_f1TAC_f2ACGA_rep_8	12432	23186	23186	0	CGCAGCTCTACTACGACTCGCGGAAGCGAGTCGTGGTAGAGCTGCGACACTCTTTCCCTA	15131.8
TDG_TG_f1CAT_f2ATAA_rep_2	14467	30418	30418	0	CGCAGCTCCATTATAACTCGCGGAAGCGAGTTATGATGGAGCTGCGACACTCTTTCCCTA	20193.9
TDG_TG_f1TCA_f2CCGC_rep_7	11751	22369	22369	0	CGCAGCTCTCATCCGCCTCGCGGAAGCGAGGCGGGTGAGAGCTGCGACACTCTTTCCCTA	15069
TDG_TG_f1TTG_f2TCTC_rep_4	9663	17230	17230	0	CGCAGCTCTTGTTCTCCTCGCGGAAGCGAGGAGAGCAAGAGCTGCGACACTCTTTCCCTA	11607.1
TDG_TG_f1AAG_f2CCAA_rep_1	10177	22473	22473	0	CGCAGCTCAAGTCCAACTCGCGGAAGCGAGTTGGGCTTGAGCTGCGACACTCTTTCCCTA	15269.5
TDG_TG_f1AGG_f2GCAG_rep_5	25030	47051	47051	0	CGCAGCTCAGGTGCAGCTCGCGGAAGCGAGCTGCGCCTGAGCTGCGACACTCTTTCCCTA	32120.1
TDG_TG_f1GGT_f2TCTA_rep_6	10947	19680	19680	0	CGCAGCTCGGTTTCTACTCGCGGAAGCGAGTAGAGACCGAGCTGCGACACTCTTTCCCTA	13513
TDG_TG_f1GAT_f2TACA_rep_4	10605	27020	27020	0	CGCAGCTCGATTTACACTCGCGGAAGCGAGTGTAGATCGAGCTGCGACACTCTTTCCCTA	18549.2
TDG_TG_f1GGA_f2ATAC_rep_10	13152	23384	23384	0	CGCAGCTCGGATATACCTCGCGGAAGCGAGGTATGTCCGAGCTGCGACACTCTTTCCCTA	15963.4
TDG_TG_f1TAG_f2GTGC_rep_10	20702	46982	46982	0	CGCAGCTCTAGTGTGCCTCGCGGAAGCGAGGCACGCTAGAGCTGCGACACTCTTTCCCTA	32035.7
TDG_TG_f1TAG_f2TCTG_rep_3	10454	20855	20855	0	CGCAGCTCTAGTTCTGCTCGCGGAAGCGAGCAGAGCTAGAGCTGCGACACTCTTTCCCTA	14061.3
TDG_TG_f1TTG_f2CCAC_rep_4	10758	18963	18963	0	CGCAGCTCTTGTCCACCTCGCGGAAGCGAGGTGGGCAAGAGCTGCGACACTCTTTCCCTA	12785.7
TDG_TG_f1CCG_f2CGCA_rep_6	13670	31362	31362	0	CGCAGCTCCCGTCGCACTCGCGGAAGCGAGTGCGGCGGGAGCTGCGACACTCTTTCCCTA	21127.2
TDG_TG_f1GCG_f2GGGG_rep_6	19336	35266	35266	0	CGCAGCTCGCGTGGGGCTCGCGGAAGCGAGCCCCGCGCGAGCTGCGACACTCTTTCCCTA	23682
TDG_TG_f1GGA_f2AGAC_rep_3	14720	25712	25712	0	CGCAGCTCGGATAGACCTCGCGGAAGCGAGGTCTGTCCGAGCTGCGACACTCTTTCCCTA	17192.9
TDG_TG_f1GAC_f2ACTT_rep_5	11054	22479	22479	0	CGCAGCTCGACTACTTCTCGCGGAAGCGAGAAGTGGTCGAGCTGCGACACTCTTTCCCTA	14844.2
TDG_TG_f1AGT_f2CTCC_rep_10	12143	21169	21169	0	CGCAGCTCAGTTCTCCCTCGCGGAAGCGAGGGAGGACTGAGCTGCGACACTCTTTCCCTA	13862.6
TDG_TG_f1TCA_f2TATA_rep_7	10203	16853	16853	0	CGCAGCTCTCATTATACTCGCGGAAGCGAGTATAGTGAGAGCTGCGACACTCTTTCCCTA	11166.6
TDG_TG_f1TGA_f2CCTA_rep_7	9501	21708	21708	0	CGCAGCTCTGATCCTACTCGCGGAAGCGAGTAGGGTCAGAGCTGCGACACTCTTTCCCTA	14461.5
TDG_TG_f1CAT_f2TCTG_rep_2	12588	24313	24313	0	CGCAGCTCCATTTCTGCTCGCGGAAGCGAGCAGAGATGGAGCTGCGACACTCTTTCCCTA	16257.4
TDG_TG_f1GCA_f2GACA_rep_1	22395	46043	46043	0	CGCAGCTCGCATGACACTCGCGGAAGCGAGTGTCGTGCGAGCTGCGACACTCTTTCCCTA	30944.1
TDG_TG_f1GTC_f2GGCA_rep_7	21143	43903	43903	0	CGCAGCTCGTCTGGCACTCGCGGAAGCGAGTGCCGGACGAGCTGCGACACTCTTTCCCTA	29515.8
TDG_TG_f1AAT_f2GTTG_rep_4	23505	41420	41420	0	CGCAGCTCAATTGTTGCTCGCGGAAGCGAGCAACGATTGAGCTGCGACACTCTTTCCCTA	27971.5
TDG_TG_f1GCC_f2TGAA_rep_8	10531	23142	23142	0	CGCAGCTCGCCTTGAACTCGCGGAAGCGAGTTCAGGGCGAGCTGCGACACTCTTTCCCTA	15610.2
TDG_TG_f1TTT_f2CAGT_rep_10	10443	20404	20404	0	CGCAGCTCTTTTCAGTCTCGCGGAAGCGAGACTGGAAAGAGCTGCGACACTCTTTCCCTA	13810.4
TDG_TG_f1ACA_f2AAAC_rep_5	12761	24228	24228	0	CGCAGCTCACATAAACCTCGCGGAAGCGAGGTTTGTGTGAGCTGCGACACTCTTTCCCTA	16772
TDG_TG_f1TAA_f2GATA_rep_9	17892	36243	36243	0	CGCAGCTCTAATGATACTCGCGGAAGCGAGTATCGTTAGAGCTGCGACACTCTTTCCCTA	25089.5
TDG_TG_f1CCC_f2ATGT_rep_4	12918	28732	28732	0	CGCAGCTCCCCTATGTCTCGCGGAAGCGAGACATGGGGGAGCTGCGACACTCTTTCCCTA	20070.6
TDG_TG_f1GGC_f2AAGG_rep_1	12662	24253	24253	0	CGCAGCTCGGCTAAGGCTCGCGGAAGCGAGCCTTGGCCGAGCTGCGACACTCTTTCCCTA	17115.6
TDG_TG_f1TTC_f2CCGG_rep_10	12579	25481	25481	0	CGCAGCTCTTCTCCGGCTCGCGGAAGCGAGCCGGGGAAGAGCTGCGACACTCTTTCCCTA	17992.3
TDG_TG_f1CTC_f2CGTG_rep_5	12063	25438	25438	0	CGCAGCTCCTCTCGTGCTCGCGGAAGCGAGCACGGGAGGAGCTGCGACACTCTTTCCCTA	17961.9
TDG_TG_f1TCG_f2TCCT_rep_2	11821	21118	21118	0	CGCAGCTCTCGTTCCTCTCGCGGAAGCGAGAGGAGCGAGAGCTGCGACACTCTTTCCCTA	14825.9
TDG_TG_f1CCA_f2AATT_rep_4	11543	24547	24547	0	CGCAGCTCCCATAATTCTCGCGGAAGCGAGAATTGTGGGAGCTGCGACACTCTTTCCCTA	17332.8
TDG_TG_f1CGG_f2TGTC_rep_3	12204	24269	24269	0	CGCAGCTCCGGTTGTCCTCGCGGAAGCGAGGACAGCCGGAGCTGCGACACTCTTTCCCTA	17038.1
TDG_TG_f1CCT_f2TAAT_rep_3	11694	18875	18875	0	CGCAGCTCCCTTTAATCTCGCGGAAGCGAGATTAGAGGGAGCTGCGACACTCTTTCCCTA	13327.7
TDG_TG_f1CCT_f2TCGG_rep_9	11667	22830	22830	0	CGCAGCTCCCTTTCGGCTCGCGGAAGCGAGCCGAGAGGGAGCTGCGACACTCTTTCCCTA	16070.6
dBr_2543	10984	25304	25304	0	CGCACTCCGCCAACATATCGCGGAAGCGATATGTTGGCGGAGTGCGACACTCTTTCCCTA	18028.3
TDG_TG_f1GCA_f2ACTC_rep_3	11290	22617	22617	0	CGCAGCTCGCATACTCCTCGCGGAAGCGAGGAGTGTGCGAGCTGCGACACTCTTTCCCTA	16194.3
TDG_TG_f1GGG_f2ACAC_rep_3	12237	24209	24209	0	CGCAGCTCGGGTACACCTCGCGGAAGCGAGGTGTGCCCGAGCTGCGACACTCTTTCCCTA	17518.7
TDG_TG_f1GAT_f2GTAA_rep_10	17644	33800	33800	0	CGCAGCTCGATTGTAACTCGCGGAAGCGAGTTACGATCGAGCTGCGACACTCTTTCCCTA	24548.1
TDG_TG_f1ATT_f2TCCT_rep_3	9814	19018	19018	0	CGCAGCTCATTTTCCTCTCGCGGAAGCGAGAGGAGAATGAGCTGCGACACTCTTTCCCTA	13843.9
TDG_TG_f1TGA_f2TGCT_rep_8	8546	17858	17858	0	CGCAGCTCTGATTGCTCTCGCGGAAGCGAGAGCAGTCAGAGCTGCGACACTCTTTCCCTA	13295.3
TDG_TG_f1TGT_f2AGGG_rep_3	10527	23336	23336	0	CGCAGCTCTGTTAGGGCTCGCGGAAGCGAGCCCTGACAGAGCTGCGACACTCTTTCCCTA	17537.3
TDG_TG_f1AGT_f2CGGC_rep_1	10039	18011	18011	0	CGCAGCTCAGTTCGGCCTCGCGGAAGCGAGGCCGGACTGAGCTGCGACACTCTTTCCCTA	13514.3
TDG_TG_f1TAC_f2ATAG_rep_2	10818	21438	21438	0	CGCAGCTCTACTATAGCTCGCGGAAGCGAGCTATGGTAGAGCTGCGACACTCTTTCCCTA	16277.2
TDG_control_ETS1_rep_3	9458	20367	20367	0	CGCAGCTCACTTCCGGCTCGCGGAAGCGAGCCGGAAGTGAGCTGCGACACTCTTTCCCTA	15706.1
dBr_3544	12816	24072	24072	0	CGCGTTCATCGATACGCGCGCGGAAGCGCGCGTATCGATGAACGCGACACTCTTTCCCTA	18822.8
TDG_TG_f1GAC_f2ATCA_rep_5	12595	24859	24859	0	CGCAGCTCGACTATCACTCGCGGAAGCGAGTGATGGTCGAGCTGCGACACTCTTTCCCTA	19763.7
TDG_TG_f1TAG_f2AAAC_rep_5	10021	19638	19638	0	CGCAGCTCTAGTAAACCTCGCGGAAGCGAGGTTTGCTAGAGCTGCGACACTCTTTCCCTA	15956.2
TDG_TG_f1GTA_f2ACCG_rep_10	11356	20552	20552	0	CGCAGCTCGTATACCGCTCGCGGAAGCGAGCGGTGTACGAGCTGCGACACTCTTTCCCTA	16901.6
TDG_TG_f1AAT_f2GAGC_rep_2	14272	29045	29045	0	CGCAGCTCAATTGAGCCTCGCGGAAGCGAGGCTCGATTGAGCTGCGACACTCTTTCCCTA	24402
TDG_TG_f1CCT_f2ATAG_rep_5	9597	20213	20213	0	CGCAGCTCCCTTATAGCTCGCGGAAGCGAGCTATGAGGGAGCTGCGACACTCTTTCCCTA	17021.4
TDG_TG_f1GCA_f2TTAT_rep_2	9602	17668	17668	0	CGCAGCTCGCATTTATCTCGCGGAAGCGAGATAAGTGCGAGCTGCGACACTCTTTCCCTA	14988.9
TDG_TG_f1TAG_f2TATC_rep_8	6939	15325	15325	0	CGCAGCTCTAGTTATCCTCGCGGAAGCGAGGATAGCTAGAGCTGCGACACTCTTTCCCTA	13134.3
TDG_TG_f1TAA_f2AAGG_rep_6	7152	14809	14809	0	CGCAGCTCTAATAAGGCTCGCGGAAGCGAGCCTTGTTAGAGCTGCGACACTCTTTCCCTA	13003.2
TDG_TG_f1GTA_f2GAGC_rep_8	11599	21962	21962	0	CGCAGCTCGTATGAGCCTCGCGGAAGCGAGGCTCGTACGAGCTGCGACACTCTTTCCCTA	19861.6
TDG_TG_f1ACA_f2GCTA_rep_9	16768	32162	32162	0	CGCAGCTCACATGCTACTCGCGGAAGCGAGTAGCGTGTGAGCTGCGACACTCTTTCCCTA	29839.4
TDG_TG_f1ACG_f2TAGA_rep_7	6178	13386	13386	0	CGCAGCTCACGTTAGACTCGCGGAAGCGAGTCTAGCGTGAGCTGCGACACTCTTTCCCTA	12546
TDG_TG_f1TGG_f2ACCG_rep_1	9860	18932	18932	0	CGCAGCTCTGGTACCGCTCGCGGAAGCGAGCGGTGCCAGAGCTGCGACACTCTTTCCCTA	17861.2
TDG_TG_f1ATG_f2TGTG_rep_8	6870	13111	13111	0	CGCAGCTCATGTTGTGCTCGCGGAAGCGAGCACAGCATGAGCTGCGACACTCTTTCCCTA	12440.9
dBr_0633	6265	12442	12442	0	CGCTCTGAGGAAGAACTACGCGGAAGCGTAGTTCTTCCTCAGAGCGACACTCTTTCCCTA	12250.3
TDG_TG_f1GAA_f2CGCA_rep_4	8325	16032	16032	0	CGCAGCTCGAATCGCACTCGCGGAAGCGAGTGCGGTTCGAGCTGCGACACTCTTTCCCTA	15908.9
TDG_TG_f1ATG_f2AGGC_rep_10	9135	18197	18197	0	CGCAGCTCATGTAGGCCTCGCGGAAGCGAGGCCTGCATGAGCTGCGACACTCTTTCCCTA	18113.9
TDG_TG_f1AAT_f2TAAT_rep_9	6014	11533	11533	0	CGCAGCTCAATTTAATCTCGCGGAAGCGAGATTAGATTGAGCTGCGACACTCTTTCCCTA	11518.1
TDG_TG_f1AGC_f2TGGT_rep_7	5882	12236	12236	0	CGCAGCTCAGCTTGGTCTCGCGGAAGCGAGACCAGGCTGAGCTGCGACACTCTTTCCCTA	12162.3
TDG_TG_f1TTT_f2CCTG_rep_4	6552	11808	11808	0	CGCAGCTCTTTTCCTGCTCGCGGAAGCGAGCAGGGAAAGAGCTGCGACACTCTTTCCCTA	11735.5
TDG_TG_f1ACG_f2CTTC_rep_7	6240	14060	14060	0	CGCAGCTCACGTCTTCCTCGCGGAAGCGAGGAAGGCGTGAGCTGCGACACTCTTTCCCTA	13943.1
TDG_TG_f1TTG_f2GAGC_rep_9	13353	26017	26017	0	CGCAGCTCTTGTGAGCCTCGCGGAAGCGAGGCTCGCAAGAGCTGCGACACTCTTTCCCTA	25858.8
TDG_TG_f1GCG_f2CACA_rep_5	8435	13694	13694	0	CGCAGCTCGCGTCACACTCGCGGAAGCGAGTGTGGCGCGAGCTGCGACACTCTTTCCCTA	13637.8
TDG_TG_f1GGG_f2GGCC_rep_8	14837	31417	31417	0	CGCAGCTCGGGTGGCCCTCGCGGAAGCGAGGGCCGCCCGAGCTGCGACACTCTTTCCCTA	31225.9
TDG_TG_f1TAT_f2TTTC_rep_8	6108	13117	13117	0	CGCAGCTCTATTTTTCCTCGCGGAAGCGAGGAAAGATAGAGCTGCGACACTCTTTCCCTA	13028.1
TDG_TG_f1GGC_f2GCAA_rep_5	12786	22942	22942	0	CGCAGCTCGGCTGCAACTCGCGGAAGCGAGTTGCGGCCGAGCTGCGACACTCTTTCCCTA	22825.2
TDG_TG_f1TCT_f2TACC_rep_6	6439	13258	13258	0	CGCAGCTCTCTTTACCCTCGCGGAAGCGAGGGTAGAGAGAGCTGCGACACTCTTTCCCTA	13177.4
TDG_TG_f1GAT_f2TAGA_rep_9	5976	13635	13635	0	CGCAGCTCGATTTAGACTCGCGGAAGCGAGTCTAGATCGAGCTGCGACACTCTTTCCCTA	13533.9
TDG_TG_f1CAC_f2TAAG_rep_9	6613	13111	13111	0	CGCAGCTCCACTTAAGCTCGCGGAAGCGAGCTTAGGTGGAGCTGCGACACTCTTTCCCTA	12837.6
TDG_TG_f1GGG_f2CAGC_rep_9	7164	14654	14654	0	CGCAGCTCGGGTCAGCCTCGCGGAAGCGAGGCTGGCCCGAGCTGCGACACTCTTTCCCTA	14276.9
TDG_TG_f1GAG_f2CAAA_rep_10	7104	15100	15100	0	CGCAGCTCGAGTCAAACTCGCGGAAGCGAGTTTGGCTCGAGCTGCGACACTCTTTCCCTA	14711.4
TDG_TG_f1TAT_f2CACG_rep_1	7952	14852	14852	0	CGCAGCTCTATTCACGCTCGCGGAAGCGAGCGTGGATAGAGCTGCGACACTCTTTCCCTA	14567.5
TDG_TG_f1CGT_f2CTAG_rep_2	7315	15177	15177	0	CGCAGCTCCGTTCTAGCTCGCGGAAGCGAGCTAGGACGGAGCTGCGACACTCTTTCCCTA	14863.1
TDG_TG_f1ACA_f2GCTC_rep_2	14250	28809	28809	0	CGCAGCTCACATGCTCCTCGCGGAAGCGAGGAGCGTGTGAGCTGCGACACTCTTTCCCTA	28143.4
TDG_TG_f1TTC_f2GTCC_rep_1	12631	22249	22249	0	CGCAGCTCTTCTGTCCCTCGCGGAAGCGAGGGACGGAAGAGCTGCGACACTCTTTCCCTA	21758.1
dBr_5823	7665	13921	13921	0	CGCTTCAGCCAAGGAGATCGCGGAAGCGATCTCCTTGGCTGAAGCGACACTCTTTCCCTA	13562.7
TDG_TG_f1AGG_f2AGCG_rep_3	12546	23851	23851	0	CGCAGCTCAGGTAGCGCTCGCGGAAGCGAGCGCTGCCTGAGCTGCGACACTCTTTCCCTA	23268.5
TDG_TG_f1GTG_f2TGAT_rep_9	7697	15198	15198	0	CGCAGCTCGTGTTGATCTCGCGGAAGCGAGATCAGCACGAGCTGCGACACTCTTTCCCTA	14862.7
TDG_TG_f1AAC_f2CCCC_rep_6	7102	13222	13222	0	CGCAGCTCAACTCCCCCTCGCGGAAGCGAGGGGGGGTTGAGCTGCGACACTCTTTCCCTA	12800.6
TDG_TG_f1GTA_f2TTTA_rep_4	6574	11023	11023	0	CGCAGCTCGTATTTTACTCGCGGAAGCGAGTAAAGTACGAGCTGCGACACTCTTTCCCTA	10561.3
TDG_TG_f1CGA_f2TCAG_rep_8	7413	15143	15143	0	CGCAGCTCCGATTCAGCTCGCGGAAGCGAGCTGAGTCGGAGCTGCGACACTCTTTCCCTA	14478.6
TDG_TG_f1GCG_f2CAAA_rep_10	7070	14522	14522	0	CGCAGCTCGCGTCAAACTCGCGGAAGCGAGTTTGGCGCGAGCTGCGACACTCTTTCCCTA	13830.4
TDG_TG_f1CGT_f2TGGT_rep_3	7911	15573	15573	0	CGCAGCTCCGTTTGGTCTCGCGGAAGCGAGACCAGACGGAGCTGCGACACTCTTTCCCTA	14793.2
dBr_7902	7351	14696	14696	0	CGCGTATAGAGTTGTCTTCGCGGAAGCGAAGACAACTCTATACGCGACACTCTTTCCCTA	13860.2
TDG_TG_f1TCT_f2CCAC_rep_2	7342	15520	15520	0	CGCAGCTCTCTTCCACCTCGCGGAAGCGAGGTGGGAGAGAGCTGCGACACTCTTTCCCTA	14609.7
TDG_TG_f1CAT_f2CATG_rep_9	9181	17262	17262	0	CGCAGCTCCATTCATGCTCGCGGAAGCGAGCATGGATGGAGCTGCGACACTCTTTCCCTA	16047.8
TDG_TG_f1GCC_f2TGAT_rep_5	7054	14982	14982	0	CGCAGCTCGCCTTGATCTCGCGGAAGCGAGATCAGGGCGAGCTGCGACACTCTTTCCCTA	13928.9
dBr_1258	9594	16931	16931	0	CGCCGCAGTCGGATGGCCCGCGGAAGCGGGCCATCCGACTGCGGCGACACTCTTTCCCTA	15456.1
TDG_TG_f1CCT_f2GCCA_rep_3	14411	31350	31350	0	CGCAGCTCCCTTGCCACTCGCGGAAGCGAGTGGCGAGGGAGCTGCGACACTCTTTCCCTA	28662
TDG_TG_f1TCG_f2CGGC_rep_6	8055	16602	16602	0	CGCAGCTCTCGTCGGCCTCGCGGAAGCGAGGCCGGCGAGAGCTGCGACACTCTTTCCCTA	14924.1
TDG_TG_f1TCG_f2TAGC_rep_3	7629	14853	14853	0	CGCAGCTCTCGTTAGCCTCGCGGAAGCGAGGCTAGCGAGAGCTGCGACACTCTTTCCCTA	13339.8
TDG_TG_f1TAT_f2ATCC_rep_10	11469	23770	23770	0	CGCAGCTCTATTATCCCTCGCGGAAGCGAGGGATGATAGAGCTGCGACACTCTTTCCCTA	21114.7
TDG_TG_f1TGT_f2CCCC_rep_1	6748	15073	15073	0	CGCAGCTCTGTTCCCCCTCGCGGAAGCGAGGGGGGACAGAGCTGCGACACTCTTTCCCTA	13367.2
TDG_TG_f1CCC_f2CCGA_rep_4	9561	16345	16345	0	CGCAGCTCCCCTCCGACTCGCGGAAGCGAGTCGGGGGGGAGCTGCGACACTCTTTCCCTA	14493.7
TDG_TG_f1CCT_f2ATAC_rep_9	10149	20564	20564	0	CGCAGCTCCCTTATACCTCGCGGAAGCGAGGTATGAGGGAGCTGCGACACTCTTTCCCTA	18112.5
TDG_TG_f1ACA_f2TCGT_rep_5	9143	18433	18433	0	CGCAGCTCACATTCGTCTCGCGGAAGCGAGACGAGTGTGAGCTGCGACACTCTTTCCCTA	16118.2
TDG_TG_f1CTT_f2TTGT_rep_1	7988	16829	16829	0	CGCAGCTCCTTTTTGTCTCGCGGAAGCGAGACAAGAAGGAGCTGCGACACTCTTTCCCTA	14650.8
TDG_TG_f1TAT_f2CTCA_rep_5	8102	16672	16672	0	CGCAGCTCTATTCTCACTCGCGGAAGCGAGTGAGGATAGAGCTGCGACACTCTTTCCCTA	14345.9
TDG_TG_f1ACT_f2AGGA_rep_7	9785	19324	19324	0	CGCAGCTCACTTAGGACTCGCGGAAGCGAGTCCTGAGTGAGCTGCGACACTCTTTCCCTA	16586.7
TDG_TG_f1GGT_f2TAGC_rep_10	8251	16180	16180	0	CGCAGCTCGGTTTAGCCTCGCGGAAGCGAGGCTAGACCGAGCTGCGACACTCTTTCCCTA	13848.9
TDG_TG_f1TAA_f2CCCC_rep_1	6768	14121	14121	0	CGCAGCTCTAATCCCCCTCGCGGAAGCGAGGGGGGTTAGAGCTGCGACACTCTTTCCCTA	12114
TDG_TG_f1GTC_f2ATTG_rep_6	9689	15129	15129	0	CGCAGCTCGTCTATTGCTCGCGGAAGCGAGCAATGGACGAGCTGCGACACTCTTTCCCTA	13127.1
TDG_TG_f1TGA_f2GCAG_rep_4	14247	27267	27267	0	CGCAGCTCTGATGCAGCTCGCGGAAGCGAGCTGCGTCAGAGCTGCGACACTCTTTCCCTA	23593.4
TDG_TG_f1GCG_f2CGCC_rep_9	9846	20493	20493	0	CGCAGCTCGCGTCGCCCTCGCGGAAGCGAGGGCGGCGCGAGCTGCGACACTCTTTCCCTA	17663.3
TDG_TG_f1GCC_f2GAGG_rep_9	12225	22071	22071	0	CGCAGCTCGCCTGAGGCTCGCGGAAGCGAGCCTCGGGCGAGCTGCGACACTCTTTCCCTA	18928.3
TDG_TG_f1TGC_f2GCAA_rep_4	15362	31319	31319	0	CGCAGCTCTGCTGCAACTCGCGGAAGCGAGTTGCGGCAGAGCTGCGACACTCTTTCCCTA	26932.9
TDG_TG_f1TCC_f2GCAG_rep_4	13272	26385	26385	0	CGCAGCTCTCCTGCAGCTCGCGGAAGCGAGCTGCGGGAGAGCTGCGACACTCTTTCCCTA	22444.6
TDG_TG_f1TAA_f2CTTT_rep_2	6883	11664	11664	0	CGCAGCTCTAATCTTTCTCGCGGAAGCGAGAAAGGTTAGAGCTGCGACACTCTTTCCCTA	9798.98
TDG_TG_f1GAA_f2GCCC_rep_4	12163	24114	24114	0	CGCAGCTCGAATGCCCCTCGCGGAAGCGAGGGGCGTTCGAGCTGCGACACTCTTTCCCTA	19994.9
TDG_TG_f1TGA_f2AAAG_rep_10	8120	17532	17532	0	CGCAGCTCTGATAAAGCTCGCGGAAGCGAGCTTTGTCAGAGCTGCGACACTCTTTCCCTA	14537.2
TDG_TG_f1CTA_f2GTAA_rep_2	14232	27539	27539	0	CGCAGCTCCTATGTAACTCGCGGAAGCGAGTTACGTAGGAGCTGCGACACTCTTTCCCTA	23011.7
dBr_5982	9995	22381	22381	0	CGCAAGCTCGGGATCCGACGCGGAAGCGTCGGATCCCGAGCTTGCGACACTCTTTCCCTA	18761.6
TDG_TG_f1ACC_f2TACA_rep_10	8927	18146	18146	0	CGCAGCTCACCTTACACTCGCGGAAGCGAGTGTAGGGTGAGCTGCGACACTCTTTCCCTA	15178.5
TDG_TG_f1CGT_f2ACGG_rep_3	12013	20009	20009	0	CGCAGCTCCGTTACGGCTCGCGGAAGCGAGCCGTGACGGAGCTGCGACACTCTTTCCCTA	16773.2
TDG_TG_f1CCC_f2TCGC_rep_1	9932	21793	21793	0	CGCAGCTCCCCTTCGCCTCGCGGAAGCGAGGCGAGGGGGAGCTGCGACACTCTTTCCCTA	18359.2
TDG_TG_f1ACC_f2ACAG_rep_4	9798	19314	19314	0	CGCAGCTCACCTACAGCTCGCGGAAGCGAGCTGTGGGTGAGCTGCGACACTCTTTCCCTA	16144.4
TDG_TG_f1CGG_f2AAAC_rep_1	10790	19822	19822	0	CGCAGCTCCGGTAAACCTCGCGGAAGCGAGGTTTGCCGGAGCTGCGACACTCTTTCCCTA	16165.2
TDG_TG_f1AGG_f2GAGG_rep_8	18938	37330	37330	0	CGCAGCTCAGGTGAGGCTCGCGGAAGCGAGCCTCGCCTGAGCTGCGACACTCTTTCCCTA	30175.4
TDG_TG_f1ACC_f2CGGT_rep_2	9066	19323	19323	0	CGCAGCTCACCTCGGTCTCGCGGAAGCGAGACCGGGGTGAGCTGCGACACTCTTTCCCTA	15478.6
TDG_TG_f1CCT_f2GGAC_rep_6	15818	30028	30028	0	CGCAGCTCCCTTGGACCTCGCGGAAGCGAGGTCCGAGGGAGCTGCGACACTCTTTCCCTA	23941.5
TDG_TG_f1GTG_f2TCCT_rep_6	9236	19719	19719	0	CGCAGCTCGTGTTCCTCTCGCGGAAGCGAGAGGAGCACGAGCTGCGACACTCTTTCCCTA	15667
TDG_TG_f1TGC_f2TATC_rep_1	9134	17414	17414	0	CGCAGCTCTGCTTATCCTCGCGGAAGCGAGGATAGGCAGAGCTGCGACACTCTTTCCCTA	13832.4
TDG_TG_f1TCA_f2CAAG_rep_3	9489	16665	16665	0	CGCAGCTCTCATCAAGCTCGCGGAAGCGAGCTTGGTGAGAGCTGCGACACTCTTTCCCTA	13237.5
TDG_TG_f1TGG_f2ACGG_rep_1	11575	24047	24047	0	CGCAGCTCTGGTACGGCTCGCGGAAGCGAGCCGTGCCAGAGCTGCGACACTCTTTCCCTA	18466
TDG_TG_f1GGC_f2GCTC_rep_1	15499	29310	29310	0	CGCAGCTCGGCTGCTCCTCGCGGAAGCGAGGAGCGGCCGAGCTGCGACACTCTTTCCCTA	22099.7
TDG_TG_f1GAA_f2AGAA_rep_6	11065	21619	21619	0	CGCAGCTCGAATAGAACTCGCGGAAGCGAGTTCTGTTCGAGCTGCGACACTCTTTCCCTA	16185.4
TDG_TG_f1GGG_f2TAGA_rep_2	10011	20008	20008	0	CGCAGCTCGGGTTAGACTCGCGGAAGCGAGTCTAGCCCGAGCTGCGACACTCTTTCCCTA	14603.7
TDG_TG_f1CGG_f2CCTA_rep_3	11837	21396	21396	0	CGCAGCTCCGGTCCTACTCGCGGAAGCGAGTAGGGCCGGAGCTGCGACACTCTTTCCCTA	15510.2
TDG_TG_f1GAG_f2GTCT_rep_4	23946	47791	47791	0	CGCAGCTCGAGTGTCTCTCGCGGAAGCGAGAGACGCTCGAGCTGCGACACTCTTTCCCTA	34010.4
TDG_TG_f1TCT_f2CAAT_rep_9	11144	19316	19316	0	CGCAGCTCTCTTCAATCTCGCGGAAGCGAGATTGGAGAGAGCTGCGACACTCTTTCCCTA	13454.4
TDG_TG_f1CAC_f2ATTC_rep_8	14122	29536	29536	0	CGCAGCTCCACTATTCCTCGCGGAAGCGAGGAATGGTGGAGCTGCGACACTCTTTCCCTA	20353.7
TDG_TG_f1TGT_f2CACC_rep_3	13083	25466	25466	0	CGCAGCTCTGTTCACCCTCGCGGAAGCGAGGGTGGACAGAGCTGCGACACTCTTTCCCTA	17292.4
TDG_TG_f1TCG_f2CCGC_rep_2	11747	24493	24493	0	CGCAGCTCTCGTCCGCCTCGCGGAAGCGAGGCGGGCGAGAGCTGCGACACTCTTTCCCTA	16341.2
TDG_TG_f1AGA_f2TCGT_rep_3	12041	25479	25479	0	CGCAGCTCAGATTCGTCTCGCGGAAGCGAGACGAGTCTGAGCTGCGACACTCTTTCCCTA	16837.7
TDG_TG_f1GGA_f2GATA_rep_7	18939	34153	34153	0	CGCAGCTCGGATGATACTCGCGGAAGCGAGTATCGTCCGAGCTGCGACACTCTTTCCCTA	22459.9
TDG_TG_f1ACT_f2CCGG_rep_9	14425	29504	29504	0	CGCAGCTCACTTCCGGCTCGCGGAAGCGAGCCGGGAGTGAGCTGCGACACTCTTTCCCTA	19188.8
TDG_TG_f1CCA_f2GACA_rep_10	19840	40168	40168	0	CGCAGCTCCCATGACACTCGCGGAAGCGAGTGTCGTGGGAGCTGCGACACTCTTTCCCTA	26015.9
TDG_TG_f1GCC_f2TAGT_rep_4	11562	22505	22505	0	CGCAGCTCGCCTTAGTCTCGCGGAAGCGAGACTAGGGCGAGCTGCGACACTCTTTCCCTA	14249.6
TDG_TG_f1AAA_f2GCAG_rep_10	18643	40064	40064	0	CGCAGCTCAAATGCAGCTCGCGGAAGCGAGCTGCGTTTGAGCTGCGACACTCTTTCCCTA	25158.6
TDG_TG_f1CTT_f2CCTG_rep_5	12528	25060	25060	0	CGCAGCTCCTTTCCTGCTCGCGGAAGCGAGCAGGGAAGGAGCTGCGACACTCTTTCCCTA	15562.5
TDG_TG_f1ACT_f2TATA_rep_4	11331	20948	20948	0	CGCAGCTCACTTTATACTCGCGGAAGCGAGTATAGAGTGAGCTGCGACACTCTTTCCCTA	12980.4
TDG_TG_f1GAC_f2GCCG_rep_7	20669	40800	40800	0	CGCAGCTCGACTGCCGCTCGCGGAAGCGAGCGGCGGTCGAGCTGCGACACTCTTTCCCTA	25281.7
TDG_TG_f1GGA_f2TGTC_rep_1	12934	28791	28791	0	CGCAGCTCGGATTGTCCTCGCGGAAGCGAGGACAGTCCGAGCTGCGACACTCTTTCCCTA	17911.2
TDG_TG_f1GAT_f2CGTC_rep_8	14906	29450	29450	0	CGCAGCTCGATTCGTCCTCGCGGAAGCGAGGACGGATCGAGCTGCGACACTCTTTCCCTA	18404.4
TDG_TG_f1TAT_f2TCAA_rep_4	12219	21214	21214	0	CGCAGCTCTATTTCAACTCGCGGAAGCGAGTTGAGATAGAGCTGCGACACTCTTTCCCTA	13416.2
TDG_TG_f1TGT_f2GTCT_rep_3	18620	39427	39427	0	CGCAGCTCTGTTGTCTCTCGCGGAAGCGAGAGACGACAGAGCTGCGACACTCTTTCCCTA	24819.1
TDG_TG_f1GCC_f2GAGG_rep_2	18898	38265	38265	0	CGCAGCTCGCCTGAGGCTCGCGGAAGCGAGCCTCGGGCGAGCTGCGACACTCTTTCCCTA	24146.7
TDG_TG_f1TTT_f2AACG_rep_4	15378	31854	31854	0	CGCAGCTCTTTTAACGCTCGCGGAAGCGAGCGTTGAAAGAGCTGCGACACTCTTTCCCTA	20184.3
TDG_TG_f1GGC_f2CAGC_rep_5	12664	25682	25682	0	CGCAGCTCGGCTCAGCCTCGCGGAAGCGAGGCTGGGCCGAGCTGCGACACTCTTTCCCTA	16273.4
TDG_TG_f1CGA_f2TCAG_rep_4	12366	23984	23984	0	CGCAGCTCCGATTCAGCTCGCGGAAGCGAGCTGAGTCGGAGCTGCGACACTCTTTCCCTA	15414.7
TDG_TG_f1TTT_f2CCTC_rep_6	10553	24259	24259	0	CGCAGCTCTTTTCCTCCTCGCGGAAGCGAGGAGGGAAAGAGCTGCGACACTCTTTCCCTA	15670.8
TDG_TG_f1AGG_f2TGGT_rep_4	11230	22957	22957	0	CGCAGCTCAGGTTGGTCTCGCGGAAGCGAGACCAGCCTGAGCTGCGACACTCTTTCCCTA	14877.2
TDG_TG_f1GCT_f2GTAG_rep_8	19511	40234	40234	0	CGCAGCTCGCTTGTAGCTCGCGGAAGCGAGCTACGAGCGAGCTGCGACACTCTTTCCCTA	26346.8
TDG_TG_f1GGA_f2AGTC_rep_4	13812	26971	26971	0	CGCAGCTCGGATAGTCCTCGCGGAAGCGAGGACTGTCCGAGCTGCGACACTCTTTCCCTA	17667.8
TDG_TG_f1ACT_f2GGCC_rep_4	22579	43028	43028	0	CGCAGCTCACTTGGCCCTCGCGGAAGCGAGGGCCGAGTGAGCTGCGACACTCTTTCCCTA	28225.3
TDG_TG_f1GTA_f2AGCA_rep_3	15615	33487	33487	0	CGCAGCTCGTATAGCACTCGCGGAAGCGAGTGCTGTACGAGCTGCGACACTCTTTCCCTA	21894
TDG_TG_f1CGG_f2CGCT_rep_8	18193	31275	31275	0	CGCAGCTCCGGTCGCTCTCGCGGAAGCGAGAGCGGCCGGAGCTGCGACACTCTTTCCCTA	20289.4
TDG_TG_f1GGA_f2CATT_rep_10	11667	27787	27787	0	CGCAGCTCGGATCATTCTCGCGGAAGCGAGAATGGTCCGAGCTGCGACACTCTTTCCCTA	18202.3
TDG_TG_f1CGT_f2CCGA_rep_6	13659	28294	28294	0	CGCAGCTCCGTTCCGACTCGCGGAAGCGAGTCGGGACGGAGCTGCGACACTCTTTCCCTA	18540.9
TDG_TG_f1AAA_f2TATC_rep_5	10990	22244	22244	0	CGCAGCTCAAATTATCCTCGCGGAAGCGAGGATAGTTTGAGCTGCGACACTCTTTCCCTA	14633.6
TDG_TG_f1GTG_f2GCCC_rep_3	26976	51293	53314	0	CGCAGCTCGTGTGCCCCTCGCGGAAGCGAGGGGCGCACGAGCTGCGACACTCTTTCCCTA	35217.4
TDG_TG_f1CAA_f2CGGA_rep_6	13272	27878	27878	0	CGCAGCTCCAATCGGACTCGCGGAAGCGAGTCCGGTTGGAGCTGCGACACTCTTTCCCTA	18548.6
TDG_TG_f1ATG_f2TCGC_rep_9	13262	25340	25340	0	CGCAGCTCATGTTCGCCTCGCGGAAGCGAGGCGAGCATGAGCTGCGACACTCTTTCCCTA	17186.9
TDG_TG_f1GAA_f2CACC_rep_3	13679	26386	26386	0	CGCAGCTCGAATCACCCTCGCGGAAGCGAGGGTGGTTCGAGCTGCGACACTCTTTCCCTA	17940
TDG_TG_f1TGA_f2TATA_rep_7	11135	19950	19950	0	CGCAGCTCTGATTATACTCGCGGAAGCGAGTATAGTCAGAGCTGCGACACTCTTTCCCTA	14013.1
TDG_TG_f1CTT_f2TGGA_rep_3	11571	21452	21452	0	CGCAGCTCCTTTTGGACTCGCGGAAGCGAGTCCAGAAGGAGCTGCGACACTCTTTCCCTA	15486.4
TDG_TG_f1TCT_f2CCTG_rep_6	10659	23329	23329	0	CGCAGCTCTCTTCCTGCTCGCGGAAGCGAGCAGGGAGAGAGCTGCGACACTCTTTCCCTA	16916.1
TDG_TG_f1ACT_f2TGGT_rep_2	12420	22751	22751	0	CGCAGCTCACTTTGGTCTCGCGGAAGCGAGACCAGAGTGAGCTGCGACACTCTTTCCCTA	16922.2
TDG_TG_f1TAC_f2GGGA_rep_4	17546	35891	35891	0	CGCAGCTCTACTGGGACTCGCGGAAGCGAGTCCCGGTAGAGCTGCGACACTCTTTCCCTA	28037.5
TDG_TG_f1AAA_f2TCGA_rep_6	9076	20329	20329	0	CGCAGCTCAAATTCGACTCGCGGAAGCGAGTCGAGTTTGAGCTGCGACACTCTTTCCCTA	16566.7
TDG_TG_f1CGT_f2GTGT_rep_8	16520	29601	29601	0	CGCAGCTCCGTTGTGTCTCGCGGAAGCGAGACACGACGGAGCTGCGACACTCTTTCCCTA	24704.3
TDG_TG_f1GGT_f2TAAA_rep_10	10224	19347	19347	0	CGCAGCTCGGTTTAAACTCGCGGAAGCGAGTTTAGACCGAGCTGCGACACTCTTTCCCTA	16574.2
TDG_TG_f1CCC_f2CGAC_rep_8	12005	22961	22961	0	CGCAGCTCCCCTCGACCTCGCGGAAGCGAGGTCGGGGGGAGCTGCGACACTCTTTCCCTA	20194.5
TDG_TG_f1CGT_f2GTAA_rep_5	18359	31755	31755	0	CGCAGCTCCGTTGTAACTCGCGGAAGCGAGTTACGACGGAGCTGCGACACTCTTTCCCTA	28722.5
TDG_TG_f1ACT_f2TGGC_rep_1	8908	16955	16955	0	CGCAGCTCACTTTGGCCTCGCGGAAGCGAGGCCAGAGTGAGCTGCGACACTCTTTCCCTA	15775.4
TDG_TG_f1TAA_f2CGGG_rep_6	7563	16433	16433	0	CGCAGCTCTAATCGGGCTCGCGGAAGCGAGCCCGGTTAGAGCTGCGACACTCTTTCCCTA	15594.4
TDG_TG_f1GCA_f2TCTC_rep_9	8733	14449	14449	0	CGCAGCTCGCATTCTCCTCGCGGAAGCGAGGAGAGTGCGAGCTGCGACACTCTTTCCCTA	13914.4
TDG_TG_f1AGG_f2AACT_rep_7	9264	20756	20756	0	CGCAGCTCAGGTAACTCTCGCGGAAGCGAGAGTTGCCTGAGCTGCGACACTCTTTCCCTA	20544.5
TDG_TG_f1CGA_f2TTGA_rep_8	7399	14830	14830	0	CGCAGCTCCGATTTGACTCGCGGAAGCGAGTCAAGTCGGAGCTGCGACACTCTTTCCCTA	15159.1
TDG_TG_f1TGA_f2GTCT_rep_10	13265	22638	22638	0	CGCAGCTCTGATGTCTCTCGCGGAAGCGAGAGACGTCAGAGCTGCGACACTCTTTCCCTA	24283.1
TDG_TG_f1GTC_f2CTTT_rep_1	14240	29347	29347	0	CGCAGCTCGTCTCTTTCTCGCGGAAGCGAGAAAGGGACGAGCTGCGACACTCTTTCCCTA	16897.4
TDG_TG_f1TCG_f2TCGG_rep_9	16203	29418	29418	0	CGCAGCTCTCGTTCGGCTCGCGGAAGCGAGCCGAGCGAGAGCTGCGACACTCTTTCCCTA	16753.8
TDG_TG_f1CCC_f2CTAA_rep_5	16493	30128	30128	0	CGCAGCTCCCCTCTAACTCGCGGAAGCGAGTTAGGGGGGAGCTGCGACACTCTTTCCCTA	16709.2
TDG_TG_f1TAA_f2TTAG_rep_5	13373	20772	20772	0	CGCAGCTCTAATTTAGCTCGCGGAAGCGAGCTAAGTTAGAGCTGCGACACTCTTTCCCTA	11436.7
TDG_TG_f1AAT_f2GACC_rep_1	24103	52868	47715	0	CGCAGCTCAATTGACCCTCGCGGAAGCGAGGGTCGATTGAGCTGCGACACTCTTTCCCTA	26147.3
TDG_TG_f1GAC_f2CTTA_rep_4	16450	31266	31266	0	CGCAGCTCGACTCTTACTCGCGGAAGCGAGTAAGGGTCGAGCTGCGACACTCTTTCCCTA	16936.3
TDG_TG_f1TCT_f2GCTG_rep_9	29227	47021	47021	0	CGCAGCTCTCTTGCTGCTCGCGGAAGCGAGCAGCGAGAGAGCTGCGACACTCTTTCCCTA	25018.1
TDG_TG_f1CCC_f2AAGG_rep_8	16578	34617	34617	0	CGCAGCTCCCCTAAGGCTCGCGGAAGCGAGCCTTGGGGGAGCTGCGACACTCTTTCCCTA	18323.5
TDG_TG_f1GTC_f2AACT_rep_3	17052	29943	29943	0	CGCAGCTCGTCTAACTCTCGCGGAAGCGAGAGTTGGACGAGCTGCGACACTCTTTCCCTA	15705.6
TDG_TG_f1TAG_f2ATAG_rep_9	18296	28563	28563	0	CGCAGCTCTAGTATAGCTCGCGGAAGCGAGCTATGCTAGAGCTGCGACACTCTTTCCCTA	15016.6
TDG_TG_f1GGC_f2CTTA_rep_4	16076	29122	29122	0	CGCAGCTCGGCTCTTACTCGCGGAAGCGAGTAAGGGCCGAGCTGCGACACTCTTTCCCTA	15386.6
TDG_TG_f1CCG_f2ATAT_rep_10	17605	32706	32706	0	CGCAGCTCCCGTATATCTCGCGGAAGCGAGATATGCGGGAGCTGCGACACTCTTTCCCTA	17378.2
TDG_TG_f1CGA_f2CCTA_rep_10	16433	27477	27477	0	CGCAGCTCCGATCCTACTCGCGGAAGCGAGTAGGGTCGGAGCTGCGACACTCTTTCCCTA	14675.3
TDG_TG_f1CCA_f2CATG_rep_7	14488	32709	32709	0	CGCAGCTCCCATCATGCTCGCGGAAGCGAGCATGGTGGGAGCTGCGACACTCTTTCCCTA	17345.4
TDG_TG_f1ACA_f2TGTC_rep_4	16094	27150	27150	0	CGCAGCTCACATTGTCCTCGCGGAAGCGAGGACAGTGTGAGCTGCGACACTCTTTCCCTA	14480.6
TDG_TG_f1ACG_f2AGAT_rep_1	17338	38040	38040	0	CGCAGCTCACGTAGATCTCGCGGAAGCGAGATCTGCGTGAGCTGCGACACTCTTTCCCTA	20900.5
TDG_TG_f1AAT_f2GTAG_rep_3	28131	44206	44206	0	CGCAGCTCAATTGTAGCTCGCGGAAGCGAGCTACGATTGAGCTGCGACACTCTTTCCCTA	24299.6
TDG_TG_f1CCA_f2ATAT_rep_10	20112	40253	40253	0	CGCAGCTCCCATATATCTCGCGGAAGCGAGATATGTGGGAGCTGCGACACTCTTTCCCTA	22116.3
TDG_TG_f1CCC_f2AACA_rep_7	16208	33870	33870	0	CGCAGCTCCCCTAACACTCGCGGAAGCGAGTGTTGGGGGAGCTGCGACACTCTTTCCCTA	18673.6
TDG_TG_f1GTC_f2GAAG_rep_5	23828	44932	44932	0	CGCAGCTCGTCTGAAGCTCGCGGAAGCGAGCTTCGGACGAGCTGCGACACTCTTTCCCTA	25233.2
TDG_TG_f1TAA_f2GGTA_rep_7	23115	45788	45788	0	CGCAGCTCTAATGGTACTCGCGGAAGCGAGTACCGTTAGAGCTGCGACACTCTTTCCCTA	25998.3
TDG_TG_f1TAT_f2CTCT_rep_7	12989	27877	27877	0	CGCAGCTCTATTCTCTCTCGCGGAAGCGAGAGAGGATAGAGCTGCGACACTCTTTCCCTA	15876.7
TDG_TG_f1AAT_f2CGGT_rep_8	16766	29084	29084	0	CGCAGCTCAATTCGGTCTCGCGGAAGCGAGACCGGATTGAGCTGCGACACTCTTTCCCTA	16653.7
TDG_TG_f1ACT_f2GCGT_rep_2	31204	54778	61553	0	CGCAGCTCACTTGCGTCTCGCGGAAGCGAGACGCGAGTGAGCTGCGACACTCTTTCCCTA	35340.4
TDG_TG_f1CCG_f2TATA_rep_5	13666	28243	28243	0	CGCAGCTCCCGTTATACTCGCGGAAGCGAGTATAGCGGGAGCTGCGACACTCTTTCCCTA	16283.8
TDG_TG_f1CTT_f2GGCC_rep_5	25359	43360	43360	0	CGCAGCTCCTTTGGCCCTCGCGGAAGCGAGGGCCGAAGGAGCTGCGACACTCTTTCCCTA	24993.3
TDG_TG_f1CTG_f2TTTG_rep_5	13972	26132	26132	0	CGCAGCTCCTGTTTTGCTCGCGGAAGCGAGCAAAGCAGGAGCTGCGACACTCTTTCCCTA	15273.4
dBr_5028	13932	27232	27232	0	CGCTATACCTGGGAATATCGCGGAAGCGATATTCCCAGGTATAGCGACACTCTTTCCCTA	15979
TDG_TG_f1AAC_f2GGGC_rep_2	23989	40705	40705	0	CGCAGCTCAACTGGGCCTCGCGGAAGCGAGGCCCGGTTGAGCTGCGACACTCTTTCCCTA	23887
TDG_TG_f1CTA_f2TTAT_rep_6	11549	23628	23628	0	CGCAGCTCCTATTTATCTCGCGGAAGCGAGATAAGTAGGAGCTGCGACACTCTTTCCCTA	13932
TDG_TG_f1AGA_f2GTCG_rep_2	23813	46568	46568	0	CGCAGCTCAGATGTCGCTCGCGGAAGCGAGCGACGTCTGAGCTGCGACACTCTTTCCCTA	27711.2
TDG_TG_f1CGC_f2GCAG_rep_10	26304	47662	47662	0	CGCAGCTCCGCTGCAGCTCGCGGAAGCGAGCTGCGGCGGAGCTGCGACACTCTTTCCCTA	28567.3
TDG_TG_f1GAA_f2ACTC_rep_2	13828	27995	27995	0	CGCAGCTCGAATACTCCTCGCGGAAGCGAGGAGTGTTCGAGCTGCGACACTCTTTCCCTA	16997
TDG_TG_f1GAT_f2CTTA_rep_4	14228	27948	27948	0	CGCAGCTCGATTCTTACTCGCGGAAGCGAGTAAGGATCGAGCTGCGACACTCTTTCCCTA	17026.5
TDG_TG_f1GTG_f2AGCT_rep_5	20692	35080	35080	0	CGCAGCTCGTGTAGCTCTCGCGGAAGCGAGAGCTGCACGAGCTGCGACACTCTTTCCCTA	21298.6
TDG_TG_f1ATG_f2TGAC_rep_8	12064	25541	25541	0	CGCAGCTCATGTTGACCTCGCGGAAGCGAGGTCAGCATGAGCTGCGACACTCTTTCCCTA	15520.1
TDG_TG_f1ACA_f2CTAT_rep_2	11300	21363	21363	0	CGCAGCTCACATCTATCTCGCGGAAGCGAGATAGGTGTGAGCTGCGACACTCTTTCCCTA	13255
TDG_TG_f1CTA_f2CTAG_rep_9	10493	19993	19993	0	CGCAGCTCCTATCTAGCTCGCGGAAGCGAGCTAGGTAGGAGCTGCGACACTCTTTCCCTA	12413.6
TDG_TG_f1CCC_f2TGCT_rep_9	14065	26106	26106	0	CGCAGCTCCCCTTGCTCTCGCGGAAGCGAGAGCAGGGGGAGCTGCGACACTCTTTCCCTA	16403.2
TDG_TG_f1GAG_f2CCTC_rep_1	12014	21100	21100	0	CGCAGCTCGAGTCCTCCTCGCGGAAGCGAGGAGGGCTCGAGCTGCGACACTCTTTCCCTA	13439.6
TDG_TG_f1ACC_f2TCTT_rep_9	11616	24941	24941	0	CGCAGCTCACCTTCTTCTCGCGGAAGCGAGAAGAGGGTGAGCTGCGACACTCTTTCCCTA	15955.5
TDG_TG_f1CGG_f2GAGG_rep_8	23335	42542	42542	0	CGCAGCTCCGGTGAGGCTCGCGGAAGCGAGCCTCGCCGGAGCTGCGACACTCTTTCCCTA	27217.5
TDG_TG_f1CAA_f2TGGT_rep_4	13227	24416	24416	0	CGCAGCTCCAATTGGTCTCGCGGAAGCGAGACCAGTTGGAGCTGCGACACTCTTTCCCTA	15522.4
TDG_TG_f1ATA_f2TCTT_rep_3	12047	20649	20649	0	CGCAGCTCATATTCTTCTCGCGGAAGCGAGAAGAGTATGAGCTGCGACACTCTTTCCCTA	13011
dBr_6516	12690	25466	25466	0	CGCTGATAAGGTCAATGACGCGGAAGCGTCATTGACCTTATCAGCGACACTCTTTCCCTA	15988.7
TDG_TG_f1AGT_f2CCCA_rep_8	12914	24162	24162	0	CGCAGCTCAGTTCCCACTCGCGGAAGCGAGTGGGGACTGAGCTGCGACACTCTTTCCCTA	14885.2
TDG_TG_f1CCA_f2ATCA_rep_7	17666	32688	32688	0	CGCAGCTCCCATATCACTCGCGGAAGCGAGTGATGTGGGAGCTGCGACACTCTTTCCCTA	19969
TDG_TG_f1ACT_f2GTGG_rep_6	22622	42786	42786	0	CGCAGCTCACTTGTGGCTCGCGGAAGCGAGCCACGAGTGAGCTGCGACACTCTTTCCCTA	26240.7
TDG_TG_f1CTC_f2CCGC_rep_4	14653	25532	25532	0	CGCAGCTCCTCTCCGCCTCGCGGAAGCGAGGCGGGGAGGAGCTGCGACACTCTTTCCCTA	15649.2
TDG_TG_f1TTC_f2GCCC_rep_1	23638	47224	47224	0	CGCAGCTCTTCTGCCCCTCGCGGAAGCGAGGGGCGGAAGAGCTGCGACACTCTTTCCCTA	28830.4
TDG_TG_f1GAT_f2CAAC_rep_10	17197	32837	32837	0	CGCAGCTCGATTCAACCTCGCGGAAGCGAGGTTGGATCGAGCTGCGACACTCTTTCCCTA	20047.1
TDG_TG_f1CCG_f2ATAG_rep_9	16802	27988	27988	0	CGCAGCTCCCGTATAGCTCGCGGAAGCGAGCTATGCGGGAGCTGCGACACTCTTTCCCTA	17040.8
TDG_TG_f1CTG_f2AGGT_rep_2	16256	33392	33392	0	CGCAGCTCCTGTAGGTCTCGCGGAAGCGAGACCTGCAGGAGCTGCGACACTCTTTCCCTA	20278.8
TDG_TG_f1TTC_f2AGAG_rep_9	14610	29810	29810	0	CGCAGCTCTTCTAGAGCTCGCGGAAGCGAGCTCTGGAAGAGCTGCGACACTCTTTCCCTA	17829.3
TDG_TG_f1CGC_f2GATC_rep_3	25394	44817	44817	0	CGCAGCTCCGCTGATCCTCGCGGAAGCGAGGATCGGCGGAGCTGCGACACTCTTTCCCTA	26255.6
TDG_TG_f1CTT_f2GGTG_rep_5	22490	44381	44381	0	CGCAGCTCCTTTGGTGCTCGCGGAAGCGAGCACCGAAGGAGCTGCGACACTCTTTCCCTA	26000.2
TDG_TG_f1CTG_f2GTGT_rep_2	25961	50213	51336	0	CGCAGCTCCTGTGTGTCTCGCGGAAGCGAGACACGCAGGAGCTGCGACACTCTTTCCCTA	30062.3
dBr_3506	12849	27066	27066	0	CGCATGATATGAGTTATTCGCGGAAGCGAATAACTCATATCATGCGACACTCTTTCCCTA	15753.7
TDG_TG_f1CAC_f2GCGA_rep_4	23593	47466	47466	0	CGCAGCTCCACTGCGACTCGCGGAAGCGAGTCGCGGTGGAGCTGCGACACTCTTTCCCTA	27760.6
TDG_TG_f1TGG_f2GAAC_rep_2	26945	47546	47546	0	CGCAGCTCTGGTGAACCTCGCGGAAGCGAGGTTCGCCAGAGCTGCGACACTCTTTCCCTA	27842.9
TDG_TG_f1AGA_f2GTAG_rep_7	21014	40642	40642	0	CGCAGCTCAGATGTAGCTCGCGGAAGCGAGCTACGTCTGAGCTGCGACACTCTTTCCCTA	24071.1
TDG_TG_f1GAG_f2TATG_rep_8	11996	28237	28237	0	CGCAGCTCGAGTTATGCTCGCGGAAGCGAGCATAGCTCGAGCTGCGACACTCTTTCCCTA	16611.1
TDG_TG_f1CAG_f2CTAC_rep_8	17731	27881	27881	0	CGCAGCTCCAGTCTACCTCGCGGAAGCGAGGTAGGCTGGAGCTGCGACACTCTTTCCCTA	16228.1
TDG_TG_f1GTC_f2CTCG_rep_8	16292	27567	27567	0	CGCAGCTCGTCTCTCGCTCGCGGAAGCGAGCGAGGGACGAGCTGCGACACTCTTTCCCTA	16045.1
TDG_TG_f1GAT_f2TATT_rep_2	12614	27087	27087	0	CGCAGCTCGATTTATTCTCGCGGAAGCGAGAATAGATCGAGCTGCGACACTCTTTCCCTA	15868.7
TDG_TG_f1ATA_f2GGCT_rep_5	25339	41272	41272	0	CGCAGCTCATATGGCTCTCGCGGAAGCGAGAGCCGTATGAGCTGCGACACTCTTTCCCTA	23972.3
TDG_TG_f1GAC_f2AATA_rep_8	16352	30636	30636	0	CGCAGCTCGACTAATACTCGCGGAAGCGAGTATTGGTCGAGCTGCGACACTCTTTCCCTA	17627.6
TDG_TG_f1GAC_f2CGGT_rep_6	15159	30438	30438	0	CGCAGCTCGACTCGGTCTCGCGGAAGCGAGACCGGGTCGAGCTGCGACACTCTTTCCCTA	17458.7
TDG_TG_f1AAT_f2CAGT_rep_1	13992	27123	27123	0	CGCAGCTCAATTCAGTCTCGCGGAAGCGAGACTGGATTGAGCTGCGACACTCTTTCCCTA	15510.7
TDG_TG_f1AGG_f2GTTA_rep_9	27277	58988	53900	0	CGCAGCTCAGGTGTTACTCGCGGAAGCGAGTAACGCCTGAGCTGCGACACTCTTTCCCTA	30390
TDG_TG_f1AGA_f2TACT_rep_5	11598	23141	23141	0	CGCAGCTCAGATTACTCTCGCGGAAGCGAGAGTAGTCTGAGCTGCGACACTCTTTCCCTA	12836
TDG_TG_f1CCG_f2GTAG_rep_1	25615	44415	44415	0	CGCAGCTCCCGTGTAGCTCGCGGAAGCGAGCTACGCGGGAGCTGCGACACTCTTTCCCTA	24520
TDG_TG_f1GTG_f2TCAC_rep_2	14946	27332	27332	0	CGCAGCTCGTGTTCACCTCGCGGAAGCGAGGTGAGCACGAGCTGCGACACTCTTTCCCTA	14423.4
TDG_TG_f1GCC_f2GGTT_rep_2	24552	38442	38442	0	CGCAGCTCGCCTGGTTCTCGCGGAAGCGAGAACCGGGCGAGCTGCGACACTCTTTCCCTA	20003
TDG_TG_f1CTG_f2CGCT_rep_1	18209	34658	34658	0	CGCAGCTCCTGTCGCTCTCGCGGAAGCGAGAGCGGCAGGAGCTGCGACACTCTTTCCCTA	18034
TDG_TG_f1CTT_f2ATTA_rep_8	17343	32908	32908	0	CGCAGCTCCTTTATTACTCGCGGAAGCGAGTAATGAAGGAGCTGCGACACTCTTTCCCTA	17136
TDG_TG_f1GTC_f2GTCC_rep_2	26345	43889	43889	0	CGCAGCTCGTCTGTCCCTCGCGGAAGCGAGGGACGGACGAGCTGCGACACTCTTTCCCTA	22873
TDG_TG_f1GGA_f2TAAG_rep_8	12477	28809	28809	0	CGCAGCTCGGATTAAGCTCGCGGAAGCGAGCTTAGTCCGAGCTGCGACACTCTTTCCCTA	15012.6
TDG_TG_f1GAG_f2AGAC_rep_3	20501	42363	42363	0	CGCAGCTCGAGTAGACCTCGCGGAAGCGAGGTCTGCTCGAGCTGCGACACTCTTTCCCTA	22155.5
TDG_TG_f1CGG_f2ACTA_rep_8	18892	38967	38967	0	CGCAGCTCCGGTACTACTCGCGGAAGCGAGTAGTGCCGGAGCTGCGACACTCTTTCCCTA	20354.1
TDG_TG_f1GAC_f2GTGT_rep_4	20914	42773	42773	0	CGCAGCTCGACTGTGTCTCGCGGAAGCGAGACACGGTCGAGCTGCGACACTCTTTCCCTA	22311.3
TDG_TG_f1TCC_f2GGTG_rep_4	23548	54211	46633	0	CGCAGCTCTCCTGGTGCTCGCGGAAGCGAGCACCGGGAGAGCTGCGACACTCTTTCCCTA	24419.1
TDG_TG_f1GTC_f2TCGT_rep_9	14393	31618	31618	0	CGCAGCTCGTCTTCGTCTCGCGGAAGCGAGACGAGGACGAGCTGCGACACTCTTTCCCTA	16732.9
TDG_TG_f1GAA_f2CACA_rep_1	16239	30591	30591	0	CGCAGCTCGAATCACACTCGCGGAAGCGAGTGTGGTTCGAGCTGCGACACTCTTTCCCTA	16154.5
TDG_TG_f1GTG_f2TCTT_rep_5	14045	25136	25136	0	CGCAGCTCGTGTTCTTCTCGCGGAAGCGAGAAGAGCACGAGCTGCGACACTCTTTCCCTA	13512.4
TDG_TG_f1GGT_f2GGGT_rep_1	19768	42548	42548	0	CGCAGCTCGGTTGGGTCTCGCGGAAGCGAGACCCGACCGAGCTGCGACACTCTTTCCCTA	23153.5
TDG_TG_f1CGA_f2CCCC_rep_4	15839	30379	30379	0	CGCAGCTCCGATCCCCCTCGCGGAAGCGAGGGGGGTCGGAGCTGCGACACTCTTTCCCTA	16773.4
TDG_TG_f1TAC_f2ACCG_rep_8	18575	36078	36078	0	CGCAGCTCTACTACCGCTCGCGGAAGCGAGCGGTGGTAGAGCTGCGACACTCTTTCCCTA	19979.7
dBr_5201	15425	27926	27926	0	CGCGACCAATAGAGTGGCCGCGGAAGCGGCCACTCTATTGGTCGCGACACTCTTTCCCTA	15528.5
TDG_TG_f1AGA_f2CATT_rep_3	12935	25127	25127	0	CGCAGCTCAGATCATTCTCGCGGAAGCGAGAATGGTCTGAGCTGCGACACTCTTTCCCTA	14183.2
TDG_TG_f1CGA_f2ACCA_rep_10	18313	37598	37598	0	CGCAGCTCCGATACCACTCGCGGAAGCGAGTGGTGTCGGAGCTGCGACACTCTTTCCCTA	21386.6
TDG_TG_f1CAC_f2GAGC_rep_10	24186	48771	48771	0	CGCAGCTCCACTGAGCCTCGCGGAAGCGAGGCTCGGTGGAGCTGCGACACTCTTTCCCTA	27661.5
TDG_TG_f1ATC_f2GCGT_rep_1	27463	51916	54263	0	CGCAGCTCATCTGCGTCTCGCGGAAGCGAGACGCGGATGAGCTGCGACACTCTTTCCCTA	30879.5
TDG_TG_f1TTT_f2TCTT_rep_10	14326	25392	25392	0	CGCAGCTCTTTTTCTTCTCGCGGAAGCGAGAAGAGAAAGAGCTGCGACACTCTTTCCCTA	14546.8
TDG_TG_f1CGC_f2GCTC_rep_10	25209	50346	49870	0	CGCAGCTCCGCTGCTCCTCGCGGAAGCGAGGAGCGGCGGAGCTGCGACACTCTTTCCCTA	28685
dBr_4199	16156	32485	32485	0	CGCGGGTACGAGTCCTCCCGCGGAAGCGGGAGGACTCGTACCCGCGACACTCTTTCCCTA	18705.5
TDG_TG_f1GGC_f2CCTC_rep_8	15555	28395	28395	0	CGCAGCTCGGCTCCTCCTCGCGGAAGCGAGGAGGGGCCGAGCTGCGACACTCTTTCCCTA	16280.6
TDG_TG_f1TGG_f2CCAG_rep_10	14780	26073	26073	0	CGCAGCTCTGGTCCAGCTCGCGGAAGCGAGCTGGGCCAGAGCTGCGACACTCTTTCCCTA	14949.2
TDG_TG_f1TTT_f2TTGG_rep_9	13884	28162	28162	0	CGCAGCTCTTTTTTGGCTCGCGGAAGCGAGCCAAGAAAGAGCTGCGACACTCTTTCCCTA	16216.2
TDG_TG_f1CGA_f2CATC_rep_3	17159	33021	33021	0	CGCAGCTCCGATCATCCTCGCGGAAGCGAGGATGGTCGGAGCTGCGACACTCTTTCCCTA	19014.1
TDG_TG_f1CCT_f2CGTC_rep_1	18765	37605	37605	0	CGCAGCTCCCTTCGTCCTCGCGGAAGCGAGGACGGAGGGAGCTGCGACACTCTTTCCCTA	21793.9
TDG_TG_f1TGC_f2TGTT_rep_8	13575	29672	29672	0	CGCAGCTCTGCTTGTTCTCGCGGAAGCGAGAACAGGCAGAGCTGCGACACTCTTTCCCTA	17196.4
TDG_TG_f1TAG_f2TATC_rep_1	14091	25369	25369	0	CGCAGCTCTAGTTATCCTCGCGGAAGCGAGGATAGCTAGAGCTGCGACACTCTTTCCCTA	14782.7
TDG_TG_f1AGA_f2CATG_rep_4	15345	30355	30355	0	CGCAGCTCAGATCATGCTCGCGGAAGCGAGCATGGTCTGAGCTGCGACACTCTTTCCCTA	17440.6
TDG_TG_f1GCT_f2AGCG_rep_4	22810	45009	45009	0	CGCAGCTCGCTTAGCGCTCGCGGAAGCGAGCGCTGAGCGAGCTGCGACACTCTTTCCCTA	25479.4
TDG_TG_f1CGG_f2AATA_rep_9	17918	34912	34912	0	CGCAGCTCCGGTAATACTCGCGGAAGCGAGTATTGCCGGAGCTGCGACACTCTTTCCCTA	19548.6
TDG_TG_f1GAT_f2TAGA_rep_4	15633	30160	30160	0	CGCAGCTCGATTTAGACTCGCGGAAGCGAGTCTAGATCGAGCTGCGACACTCTTTCCCTA	17045.6
TDG_TG_f1ATG_f2AGGT_rep_10	18994	35422	35422	0	CGCAGCTCATGTAGGTCTCGCGGAAGCGAGACCTGCATGAGCTGCGACACTCTTTCCCTA	20019.5
TDG_TG_f1AAA_f2TCAC_rep_2	14303	24980	24980	0	CGCAGCTCAAATTCACCTCGCGGAAGCGAGGTGAGTTTGAGCTGCGACACTCTTTCCCTA	14032.4
TDG_TG_f1CAT_f2CTTC_rep_6	15357	30480	30480	0	CGCAGCTCCATTCTTCCTCGCGGAAGCGAGGAAGGATGGAGCTGCGACACTCTTTCCCTA	17122
TDG_TG_f1AGT_f2GAGA_rep_9	24186	38892	38892	0	CGCAGCTCAGTTGAGACTCGCGGAAGCGAGTCTCGACTGAGCTGCGACACTCTTTCCCTA	21918
TDG_TG_f1GCT_f2AGTA_rep_10	19641	38197	38197	0	CGCAGCTCGCTTAGTACTCGCGGAAGCGAGTACTGAGCGAGCTGCGACACTCTTTCCCTA	21717.2
TDG_TG_f1ATT_f2ACAG_rep_8	15737	32616	32616	0	CGCAGCTCATTTACAGCTCGCGGAAGCGAGCTGTGAATGAGCTGCGACACTCTTTCCCTA	18536
TDG_TG_f1ACC_f2TCTA_rep_9	14202	22701	22701	0	CGCAGCTCACCTTCTACTCGCGGAAGCGAGTAGAGGGTGAGCTGCGACACTCTTTCCCTA	12856.1
TDG_TG_f1TCC_f2ATGG_rep_1	15501	28407	28407	0	CGCAGCTCTCCTATGGCTCGCGGAAGCGAGCCATGGGAGAGCTGCGACACTCTTTCCCTA	16071.2
TDG_TG_f1TTA_f2AGGC_rep_10	14767	30663	30663	0	CGCAGCTCTTATAGGCCTCGCGGAAGCGAGGCCTGTAAGAGCTGCGACACTCTTTCCCTA	17135.3
TDG_TG_f1ACC_f2TCGC_rep_7	15436	23983	23983	0	CGCAGCTCACCTTCGCCTCGCGGAAGCGAGGCGAGGGTGAGCTGCGACACTCTTTCCCTA	13374
TDG_TG_f1GAC_f2GAAA_rep_5	22003	42727	42727	0	CGCAGCTCGACTGAAACTCGCGGAAGCGAGTTTCGGTCGAGCTGCGACACTCTTTCCCTA	24497.6
TDG_TG_f1CCC_f2CGGT_rep_9	14271	25869	25869	0	CGCAGCTCCCCTCGGTCTCGCGGAAGCGAGACCGGGGGGAGCTGCGACACTCTTTCCCTA	15322
TDG_TG_f1CAT_f2AATT_rep_10	14758	22286	22286	0	CGCAGCTCCATTAATTCTCGCGGAAGCGAGAATTGATGGAGCTGCGACACTCTTTCCCTA	13208.6
TDG_TG_f1GTC_f2ACAA_rep_8	12588	27364	27364	0	CGCAGCTCGTCTACAACTCGCGGAAGCGAGTTGTGGACGAGCTGCGACACTCTTTCCCTA	16246
TDG_TG_f1CCA_f2ATGA_rep_8	13197	24316	24316	0	CGCAGCTCCCATATGACTCGCGGAAGCGAGTCATGTGGGAGCTGCGACACTCTTTCCCTA	14652.6
TDG_TG_f1TTA_f2TGCA_rep_5	12182	16372	16372	0	CGCAGCTCTTATTGCACTCGCGGAAGCGAGTGCAGTAAGAGCTGCGACACTCTTTCCCTA	10169.4
TDG_TG_f1CGT_f2CCTT_rep_6	10490	22078	22078	0	CGCAGCTCCGTTCCTTCTCGCGGAAGCGAGAAGGGACGGAGCTGCGACACTCTTTCCCTA	13904.7
TDG_TG_f1GAA_f2CCAA_rep_10	10395	19243	19243	0	CGCAGCTCGAATCCAACTCGCGGAAGCGAGTTGGGTTCGAGCTGCGACACTCTTTCCCTA	12489.9
TDG_TG_f1TGC_f2AGCG_rep_10	14544	24494	24494	0	CGCAGCTCTGCTAGCGCTCGCGGAAGCGAGCGCTGGCAGAGCTGCGACACTCTTTCCCTA	16391.1
TDG_TG_f1TTC_f2TTTT_rep_3	9315	19768	19768	0	CGCAGCTCTTCTTTTTCTCGCGGAAGCGAGAAAAGGAAGAGCTGCGACACTCTTTCCCTA	13295.2
TDG_TG_f1ATG_f2GAAC_rep_6	24374	46754	46754	0	CGCAGCTCATGTGAACCTCGCGGAAGCGAGGTTCGCATGAGCTGCGACACTCTTTCCCTA	31980.9
TDG_GT_f1C_f2G_rep_1	17075	27206	27206	0	CGCAGCTCTGCGGTGGCTCGCGGAAGCGAGCCACTGCAGAGCTGCGACACTCTTTCCCTA	19118.9
TDG_TG_f1GCC_f2TCCA_rep_7	10434	21581	21581	0	CGCAGCTCGCCTTCCACTCGCGGAAGCGAGTGGAGGGCGAGCTGCGACACTCTTTCCCTA	15537
TDG_TG_f1CGC_f2GCCC_rep_1	16492	35793	35793	0	CGCAGCTCCGCTGCCCCTCGCGGAAGCGAGGGGCGGCGGAGCTGCGACACTCTTTCCCTA	26237.1
TDG_TG_f1CAT_f2CTAT_rep_3	10523	18277	18277	0	CGCAGCTCCATTCTATCTCGCGGAAGCGAGATAGGATGGAGCTGCGACACTCTTTCCCTA	13487.1
TDG_TG_f1AGA_f2TCAG_rep_4	9433	18259	18259	0	CGCAGCTCAGATTCAGCTCGCGGAAGCGAGCTGAGTCTGAGCTGCGACACTCTTTCCCTA	13610.9
TDG_TG_f1AGT_f2ATAT_rep_7	8888	22312	22312	0	CGCAGCTCAGTTATATCTCGCGGAAGCGAGATATGACTGAGCTGCGACACTCTTTCCCTA	16967.3
TDG_TG_f1CCT_f2CGAA_rep_3	10411	18148	18148	0	CGCAGCTCCCTTCGAACTCGCGGAAGCGAGTTCGGAGGGAGCTGCGACACTCTTTCCCTA	13913.5
TDG_TG_f1CCG_f2CATT_rep_5	9142	18387	18387	0	CGCAGCTCCCGTCATTCTCGCGGAAGCGAGAATGGCGGGAGCTGCGACACTCTTTCCCTA	14246.4
TDG_TG_f1GGC_f2ACCG_rep_6	9519	22805	22805	0	CGCAGCTCGGCTACCGCTCGCGGAAGCGAGCGGTGGCCGAGCTGCGACACTCTTTCCCTA	18024.5
TDG_TG_f1GTA_f2AGTG_rep_2	10861	17678	17678	0	CGCAGCTCGTATAGTGCTCGCGGAAGCGAGCACTGTACGAGCTGCGACACTCTTTCCCTA	14257.3
TDG_TG_f1GAT_f2AACA_rep_10	11934	24079	24079	0	CGCAGCTCGATTAACACTCGCGGAAGCGAGTGTTGATCGAGCTGCGACACTCTTTCCCTA	19891.7
TDG_TG_f1CGT_f2ATGA_rep_1	10268	20072	20072	0	CGCAGCTCCGTTATGACTCGCGGAAGCGAGTCATGACGGAGCTGCGACACTCTTTCCCTA	17204.9
dBr_7082	9568	16420	16420	0	CGCGGTGTCGGTTGTACGCGCGGAAGCGCGTACAACCGACACCGCGACACTCTTTCCCTA	14367.2
TDG_TG_f1TGA_f2GTTG_rep_1	13051	26831	26831	0	CGCAGCTCTGATGTTGCTCGCGGAAGCGAGCAACGTCAGAGCTGCGACACTCTTTCCCTA	23553.7
TDG_TG_f1GGT_f2CTCA_rep_5	8881	17411	17411	0	CGCAGCTCGGTTCTCACTCGCGGAAGCGAGTGAGGACCGAGCTGCGACACTCTTTCCCTA	15500.5
TDG_TG_f1TAG_f2CGGG_rep_9	8140	17371	17371	0	CGCAGCTCTAGTCGGGCTCGCGGAAGCGAGCCCGGCTAGAGCTGCGACACTCTTTCCCTA	15565.1
TDG_TG_f1GAC_f2TAGG_rep_4	7248	14598	14598	0	CGCAGCTCGACTTAGGCTCGCGGAAGCGAGCCTAGGTCGAGCTGCGACACTCTTTCCCTA	13222.6
TDG_TG_f1TGA_f2CCCC_rep_10	6579	12319	12319	0	CGCAGCTCTGATCCCCCTCGCGGAAGCGAGGGGGGTCAGAGCTGCGACACTCTTTCCCTA	11461.9
TDG_TG_f1GTC_f2GCGT_rep_10	14068	26806	26806	0	CGCAGCTCGTCTGCGTCTCGCGGAAGCGAGACGCGGACGAGCTGCGACACTCTTTCCCTA	25042.4
TDG_TG_f1CAA_f2CGAA_rep_8	7661	16573	16573	0	CGCAGCTCCAATCGAACTCGCGGAAGCGAGTTCGGTTGGAGCTGCGACACTCTTTCCCTA	15621.3
TDG_TG_f1CAG_f2GCTC_rep_4	18787	39391	39391	0	CGCAGCTCCAGTGCTCCTCGCGGAAGCGAGGAGCGCTGGAGCTGCGACACTCTTTCCCTA	37813.7
TDG_TG_f1ACT_f2GACG_rep_2	15837	33328	33328	0	CGCAGCTCACTTGACGCTCGCGGAAGCGAGCGTCGAGTGAGCTGCGACACTCTTTCCCTA	32312.8
TDG_TG_f1GTC_f2GGGA_rep_6	10467	21141	21141	0	CGCAGCTCGTCTGGGACTCGCGGAAGCGAGTCCCGGACGAGCTGCGACACTCTTTCCCTA	20573.3
TDG_TG_f1TAT_f2ACCC_rep_9	8161	16838	16838	0	CGCAGCTCTATTACCCCTCGCGGAAGCGAGGGGTGATAGAGCTGCGACACTCTTTCCCTA	16376
TDG_TG_f1AAA_f2CCTG_rep_5	5887	11630	11630	0	CGCAGCTCAAATCCTGCTCGCGGAAGCGAGCAGGGTTTGAGCTGCGACACTCTTTCCCTA	11253.3
TDG_TG_f1CAC_f2AATA_rep_5	8745	16904	16904	0	CGCAGCTCCACTAATACTCGCGGAAGCGAGTATTGGTGGAGCTGCGACACTCTTTCCCTA	15969.6
TDG_TG_f1AAT_f2ATTC_rep_7	8187	18932	18932	0	CGCAGCTCAATTATTCCTCGCGGAAGCGAGGAATGATTGAGCTGCGACACTCTTTCCCTA	17879.1
TDG_TG_f1GCC_f2CAGT_rep_1	6065	12964	12964	0	CGCAGCTCGCCTCAGTCTCGCGGAAGCGAGACTGGGGCGAGCTGCGACACTCTTTCCCTA	12251.8
TDG_TG_f1CAG_f2AATA_rep_8	9389	19283	19283	0	CGCAGCTCCAGTAATACTCGCGGAAGCGAGTATTGCTGGAGCTGCGACACTCTTTCCCTA	18379
TDG_TG_f1TGA_f2CTAG_rep_2	5702	13238	13238	0	CGCAGCTCTGATCTAGCTCGCGGAAGCGAGCTAGGTCAGAGCTGCGACACTCTTTCCCTA	12641.5
TDG_TG_f1TAA_f2AGAA_rep_10	7861	17642	17642	0	CGCAGCTCTAATAGAACTCGCGGAAGCGAGTTCTGTTAGAGCTGCGACACTCTTTCCCTA	16660.8
TDG_TG_f1GTT_f2CTGG_rep_8	7414	14365	14365	0	CGCAGCTCGTTTCTGGCTCGCGGAAGCGAGCCAGGAACGAGCTGCGACACTCTTTCCCTA	13389
TDG_TG_f1CGG_f2GCAA_rep_5	18565	40284	40284	0	CGCAGCTCCGGTGCAACTCGCGGAAGCGAGTTGCGCCGGAGCTGCGACACTCTTTCCCTA	37536.7
TDG_TG_f1ATT_f2TATT_rep_10	6612	12978	12978	0	CGCAGCTCATTTTATTCTCGCGGAAGCGAGAATAGAATGAGCTGCGACACTCTTTCCCTA	12090.9
TDG_TG_f1TCG_f2ACGG_rep_10	8875	16978	16978	0	CGCAGCTCTCGTACGGCTCGCGGAAGCGAGCCGTGCGAGAGCTGCGACACTCTTTCCCTA	15811.9
TDG_TG_f1GAG_f2CTTT_rep_2	8416	18891	18891	0	CGCAGCTCGAGTCTTTCTCGCGGAAGCGAGAAAGGCTCGAGCTGCGACACTCTTTCCCTA	17439.7
TDG_TG_f1TCT_f2CATA_rep_1	6694	14770	14770	0	CGCAGCTCTCTTCATACTCGCGGAAGCGAGTATGGAGAGAGCTGCGACACTCTTTCCCTA	13414.1
TDG_TG_f1GTC_f2CGCG_rep_4	9750	18749	18749	0	CGCAGCTCGTCTCGCGCTCGCGGAAGCGAGCGCGGGACGAGCTGCGACACTCTTTCCCTA	16826.9
TDG_TG_f1GAA_f2ACTA_rep_8	8214	17566	17566	0	CGCAGCTCGAATACTACTCGCGGAAGCGAGTAGTGTTCGAGCTGCGACACTCTTTCCCTA	15630.3
TDG_TG_f1CAC_f2CTTG_rep_7	8765	16904	16904	0	CGCAGCTCCACTCTTGCTCGCGGAAGCGAGCAAGGGTGGAGCTGCGACACTCTTTCCCTA	15085.4
TDG_TG_f1ACA_f2ACTT_rep_3	9559	18037	18037	0	CGCAGCTCACATACTTCTCGCGGAAGCGAGAAGTGTGTGAGCTGCGACACTCTTTCCCTA	16025.9
TDG_TG_f1CGT_f2AGCC_rep_8	11507	24487	24487	0	CGCAGCTCCGTTAGCCCTCGCGGAAGCGAGGGCTGACGGAGCTGCGACACTCTTTCCCTA	21337.3
TDG_TG_f1CTT_f2TTCC_rep_2	8702	16838	16838	0	CGCAGCTCCTTTTTCCCTCGCGGAAGCGAGGGAAGAAGGAGCTGCGACACTCTTTCCCTA	14456.5
TDG_TG_f1ATA_f2TACC_rep_7	7797	15882	15882	0	CGCAGCTCATATTACCCTCGCGGAAGCGAGGGTAGTATGAGCTGCGACACTCTTTCCCTA	13515.2
TDG_TG_f1GGA_f2TCAA_rep_6	8921	17437	17437	0	CGCAGCTCGGATTCAACTCGCGGAAGCGAGTTGAGTCCGAGCTGCGACACTCTTTCCCTA	14489.6
TDG_TG_f1CCT_f2CTAA_rep_6	8435	18510	18510	0	CGCAGCTCCCTTCTAACTCGCGGAAGCGAGTTAGGAGGGAGCTGCGACACTCTTTCCCTA	15256.3
TDG_TG_f1GTG_f2GCCC_rep_4	20572	46839	46839	0	CGCAGCTCGTGTGCCCCTCGCGGAAGCGAGGGGCGCACGAGCTGCGACACTCTTTCCCTA	37869.1
TDG_TG_f1ACA_f2CTTG_rep_2	8841	16975	16975	0	CGCAGCTCACATCTTGCTCGCGGAAGCGAGCAAGGTGTGAGCTGCGACACTCTTTCCCTA	13624.4
TDG_TG_f1GTA_f2GTGC_rep_5	17368	34779	34779	0	CGCAGCTCGTATGTGCCTCGCGGAAGCGAGGCACGTACGAGCTGCGACACTCTTTCCCTA	27604
TDG_TG_f1AAC_f2CAAC_rep_2	9363	18056	18056	0	CGCAGCTCAACTCAACCTCGCGGAAGCGAGGTTGGGTTGAGCTGCGACACTCTTTCCCTA	13960.1
dBr_0558	11256	20998	20998	0	CGCAGCCCCATTGAAACGCGCGGAAGCGCGTTTCAATGGGGCTGCGACACTCTTTCCCTA	16214.8
TDG_TG_f1GTC_f2AGGA_rep_1	10626	18932	18932	0	CGCAGCTCGTCTAGGACTCGCGGAAGCGAGTCCTGGACGAGCTGCGACACTCTTTCCCTA	14139.2
TDG_TG_f1CCG_f2GGCG_rep_10	18637	37383	37383	0	CGCAGCTCCCGTGGCGCTCGCGGAAGCGAGCGCCGCGGGAGCTGCGACACTCTTTCCCTA	27696.5
TDG_TG_f1TGG_f2CATC_rep_8	8562	17509	17509	0	CGCAGCTCTGGTCATCCTCGCGGAAGCGAGGATGGCCAGAGCTGCGACACTCTTTCCCTA	12909.7
TDG_TG_f1TGG_f2AGCA_rep_9	17686	32330	32330	0	CGCAGCTCTGGTAGCACTCGCGGAAGCGAGTGCTGCCAGAGCTGCGACACTCTTTCCCTA	23763.8
TDG_TG_f1GTC_f2GGCT_rep_1	16063	34662	34662	0	CGCAGCTCGTCTGGCTCTCGCGGAAGCGAGAGCCGGACGAGCTGCGACACTCTTTCCCTA	25188.1
TDG_TG_f1CGT_f2ACGC_rep_7	13074	26680	26680	0	CGCAGCTCCGTTACGCCTCGCGGAAGCGAGGCGTGACGGAGCTGCGACACTCTTTCCCTA	19163.3
dBr_7476	12329	23606	23606	0	CGCATTCCTGCAATCAGGCGCGGAAGCGCCTGATTGCAGGAATGCGACACTCTTTCCCTA	16765.5
TDG_TG_f1TTA_f2ATCA_rep_5	11866	25559	25559	0	CGCAGCTCTTATATCACTCGCGGAAGCGAGTGATGTAAGAGCTGCGACACTCTTTCCCTA	18123
TDG_TG_f1GCC_f2ACCG_rep_4	14286	25797	25797	0	CGCAGCTCGCCTACCGCTCGCGGAAGCGAGCGGTGGGCGAGCTGCGACACTCTTTCCCTA	18217.3
TDG_TG_f1CTT_f2TTTT_rep_1	9079	18061	18061	0	CGCAGCTCCTTTTTTTCTCGCGGAAGCGAGAAAAGAAGGAGCTGCGACACTCTTTCCCTA	12678.7
TDG_TG_f1TCA_f2TCAC_rep_3	9882	20881	20881	0	CGCAGCTCTCATTCACCTCGCGGAAGCGAGGTGAGTGAGAGCTGCGACACTCTTTCCCTA	14775.8
TDG_TG_f1CCG_f2GGTT_rep_6	20418	38361	38361	0	CGCAGCTCCCGTGGTTCTCGCGGAAGCGAGAACCGCGGGAGCTGCGACACTCTTTCCCTA	26903
TDG_TG_f1ATA_f2TCGG_rep_5	10416	23037	23037	0	CGCAGCTCATATTCGGCTCGCGGAAGCGAGCCGAGTATGAGCTGCGACACTCTTTCCCTA	16334.7
TDG_TG_f1GGT_f2GAAT_rep_2	15457	33901	33901	0	CGCAGCTCGGTTGAATCTCGCGGAAGCGAGATTCGACCGAGCTGCGACACTCTTTCCCTA	24077.2
TDG_TG_f1CAG_f2TCTA_rep_9	11038	23811	23811	0	CGCAGCTCCAGTTCTACTCGCGGAAGCGAGTAGAGCTGGAGCTGCGACACTCTTTCCCTA	16883.5
TDG_TG_f1GTC_f2GAAT_rep_1	17601	35314	35314	0	CGCAGCTCGTCTGAATCTCGCGGAAGCGAGATTCGGACGAGCTGCGACACTCTTTCCCTA	25208.2
TDG_TG_f1GTA_f2CAGT_rep_10	10628	21733	21733	0	CGCAGCTCGTATCAGTCTCGCGGAAGCGAGACTGGTACGAGCTGCGACACTCTTTCCCTA	15506.5
TDG_TG_f1ATG_f2GAGA_rep_6	23192	50087	45939	0	CGCAGCTCATGTGAGACTCGCGGAAGCGAGTCTCGCATGAGCTGCGACACTCTTTCCCTA	32792.6
dBr_1923	13884	26760	26760	0	CGCTACATACGCCTCGCCCGCGGAAGCGGGCGAGGCGTATGTAGCGACACTCTTTCCCTA	19354.1
TDG_TG_f1ACG_f2GGTC_rep_9	23417	48748	48748	0	CGCAGCTCACGTGGTCCTCGCGGAAGCGAGGACCGCGTGAGCTGCGACACTCTTTCCCTA	35630.5
TDG_TG_f1TGG_f2GGCG_rep_4	25289	48764	48764	0	CGCAGCTCTGGTGGCGCTCGCGGAAGCGAGCGCCGCCAGAGCTGCGACACTCTTTCCCTA	36353.5
TDG_TG_f1GGG_f2CTGT_rep_7	10110	16946	16946	0	CGCAGCTCGGGTCTGTCTCGCGGAAGCGAGACAGGCCCGAGCTGCGACACTCTTTCCCTA	12794.6
TDG_TG_f1GCG_f2ACCT_rep_5	12920	26442	26442	0	CGCAGCTCGCGTACCTCTCGCGGAAGCGAGAGGTGCGCGAGCTGCGACACTCTTTCCCTA	19929.3
TDG_TG_f1CAC_f2TGGG_rep_10	9155	20326	20326	0	CGCAGCTCCACTTGGGCTCGCGGAAGCGAGCCCAGGTGGAGCTGCGACACTCTTTCCCTA	15350.6
TDG_TG_f1GGA_f2ATCG_rep_7	14043	25189	25189	0	CGCAGCTCGGATATCGCTCGCGGAAGCGAGCGATGTCCGAGCTGCGACACTCTTTCCCTA	19044.4
TDG_TG_f1TCG_f2GGAA_rep_4	17409	35486	35486	0	CGCAGCTCTCGTGGAACTCGCGGAAGCGAGTTCCGCGAGAGCTGCGACACTCTTTCCCTA	26730.9
TDG_TG_f1CTA_f2AAGG_rep_7	9956	20996	20996	0	CGCAGCTCCTATAAGGCTCGCGGAAGCGAGCCTTGTAGGAGCTGCGACACTCTTTCCCTA	15993.8
TDG_TG_f1AAC_f2AAAG_rep_10	11929	22287	22287	0	CGCAGCTCAACTAAAGCTCGCGGAAGCGAGCTTTGGTTGAGCTGCGACACTCTTTCCCTA	16797.3
TDG_TG_f1ATT_f2CTTG_rep_8	9432	19859	19859	0	CGCAGCTCATTTCTTGCTCGCGGAAGCGAGCAAGGAATGAGCTGCGACACTCTTTCCCTA	14961.4
TDG_TG_f1ACT_f2GACC_rep_5	19982	41035	41035	0	CGCAGCTCACTTGACCCTCGCGGAAGCGAGGGTCGAGTGAGCTGCGACACTCTTTCCCTA	30905.3
TDG_TG_f1ATC_f2TGGC_rep_2	10025	19700	19700	0	CGCAGCTCATCTTGGCCTCGCGGAAGCGAGGCCAGGATGAGCTGCGACACTCTTTCCCTA	14759.8
TDG_TG_f1AAG_f2TCCG_rep_3	10754	23030	23030	0	CGCAGCTCAAGTTCCGCTCGCGGAAGCGAGCGGAGCTTGAGCTGCGACACTCTTTCCCTA	16795.7
TDG_TG_f1CAC_f2TCCG_rep_8	12369	24871	24871	0	CGCAGCTCCACTTCCGCTCGCGGAAGCGAGCGGAGGTGGAGCTGCGACACTCTTTCCCTA	17800
TDG_TG_f1CCA_f2AGTA_rep_3	13592	23484	23484	0	CGCAGCTCCCATAGTACTCGCGGAAGCGAGTACTGTGGGAGCTGCGACACTCTTTCCCTA	16358.2
TDG_TG_f1GTT_f2TTTC_rep_8	11125	25410	25410	0	CGCAGCTCGTTTTTTCCTCGCGGAAGCGAGGAAAGAACGAGCTGCGACACTCTTTCCCTA	17400.3
TDG_TG_f1AAG_f2CCGC_rep_8	12190	24113	24113	0	CGCAGCTCAAGTCCGCCTCGCGGAAGCGAGGCGGGCTTGAGCTGCGACACTCTTTCCCTA	16121.2
TDG_TG_f1TCG_f2CAAT_rep_7	10561	17013	17013	0	CGCAGCTCTCGTCAATCTCGCGGAAGCGAGATTGGCGAGAGCTGCGACACTCTTTCCCTA	11093.5
TDG_TG_f1AGT_f2ATTG_rep_5	13804	28605	28605	0	CGCAGCTCAGTTATTGCTCGCGGAAGCGAGCAATGACTGAGCTGCGACACTCTTTCCCTA	18290.2
TDG_TG_f1GTT_f2TGCG_rep_8	13826	26993	26993	0	CGCAGCTCGTTTTGCGCTCGCGGAAGCGAGCGCAGAACGAGCTGCGACACTCTTTCCCTA	17247.8
TDG_TG_f1AGC_f2CTCG_rep_7	14071	24520	24520	0	CGCAGCTCAGCTCTCGCTCGCGGAAGCGAGCGAGGGCTGAGCTGCGACACTCTTTCCCTA	15560.6
TDG_TG_f1TGC_f2AAAA_rep_1	13565	28405	28405	0	CGCAGCTCTGCTAAAACTCGCGGAAGCGAGTTTTGGCAGAGCTGCGACACTCTTTCCCTA	18026
TDG_TG_f1ACA_f2CGAC_rep_7	14430	26800	26800	0	CGCAGCTCACATCGACCTCGCGGAAGCGAGGTCGGTGTGAGCTGCGACACTCTTTCCCTA	16920.3
TDG_TG_f1GCT_f2AAAG_rep_9	16655	28777	28777	0	CGCAGCTCGCTTAAAGCTCGCGGAAGCGAGCTTTGAGCGAGCTGCGACACTCTTTCCCTA	18027.5
TDG_TG_f1TTG_f2ATCA_rep_1	18513	39379	39379	0	CGCAGCTCTTGTATCACTCGCGGAAGCGAGTGATGCAAGAGCTGCGACACTCTTTCCCTA	24648.8
TDG_TG_f1TCC_f2ATTA_rep_6	13881	27342	27342	0	CGCAGCTCTCCTATTACTCGCGGAAGCGAGTAATGGGAGAGCTGCGACACTCTTTCCCTA	16995.1
TDG_TG_f1TTT_f2AAGG_rep_7	15984	29426	29426	0	CGCAGCTCTTTTAAGGCTCGCGGAAGCGAGCCTTGAAAGAGCTGCGACACTCTTTCCCTA	17950.5
TDG_TG_f1TAG_f2TCCC_rep_3	12561	26415	26415	0	CGCAGCTCTAGTTCCCCTCGCGGAAGCGAGGGGAGCTAGAGCTGCGACACTCTTTCCCTA	16266.1
TDG_TG_f1TAT_f2TTGA_rep_2	11210	22811	22811	0	CGCAGCTCTATTTTGACTCGCGGAAGCGAGTCAAGATAGAGCTGCGACACTCTTTCCCTA	14070.2
TDG_TG_f1ATA_f2GGCA_rep_5	30127	52945	59454	0	CGCAGCTCATATGGCACTCGCGGAAGCGAGTGCCGTATGAGCTGCGACACTCTTTCCCTA	37183.6
TDG_TG_f1AGC_f2GTCA_rep_10	24852	51956	49174	0	CGCAGCTCAGCTGTCACTCGCGGAAGCGAGTGACGGCTGAGCTGCGACACTCTTTCCCTA	30581.6
TDG_TG_f1ACC_f2CACA_rep_4	12614	23796	23796	0	CGCAGCTCACCTCACACTCGCGGAAGCGAGTGTGGGGTGAGCTGCGACACTCTTTCCCTA	14895.6
TDG_TG_f1GGT_f2ATTA_rep_6	14931	27174	27174	0	CGCAGCTCGGTTATTACTCGCGGAAGCGAGTAATGACCGAGCTGCGACACTCTTTCCCTA	17098.9
TDG_TG_f1GTA_f2CATT_rep_1	11617	24166	24166	0	CGCAGCTCGTATCATTCTCGCGGAAGCGAGAATGGTACGAGCTGCGACACTCTTTCCCTA	15385
TDG_TG_f1GCA_f2AAAG_rep_9	12385	25674	25674	0	CGCAGCTCGCATAAAGCTCGCGGAAGCGAGCTTTGTGCGAGCTGCGACACTCTTTCCCTA	16271.9
TDG_TG_f1TCC_f2TGCT_rep_8	12007	20308	20308	0	CGCAGCTCTCCTTGCTCTCGCGGAAGCGAGAGCAGGGAGAGCTGCGACACTCTTTCCCTA	12871
TDG_TG_f1ATG_f2AGTA_rep_1	17042	33657	33657	0	CGCAGCTCATGTAGTACTCGCGGAAGCGAGTACTGCATGAGCTGCGACACTCTTTCCCTA	21474.4
TDG_TG_f1GTG_f2TTAA_rep_1	10825	22021	22021	0	CGCAGCTCGTGTTTAACTCGCGGAAGCGAGTTAAGCACGAGCTGCGACACTCTTTCCCTA	14093.3
dBr_3757	15061	26297	26297	0	CGCCCGTGTCCTTACGCCCGCGGAAGCGGGCGTAAGGACACGGGCGACACTCTTTCCCTA	16966.7
TDG_TG_f1GGC_f2TACT_rep_8	10722	22857	22857	0	CGCAGCTCGGCTTACTCTCGCGGAAGCGAGAGTAGGCCGAGCTGCGACACTCTTTCCCTA	14773.6
TDG_TG_f1AGA_f2CGCT_rep_5	11159	22129	22129	0	CGCAGCTCAGATCGCTCTCGCGGAAGCGAGAGCGGTCTGAGCTGCGACACTCTTTCCCTA	14499.9
TDG_TG_f1TGG_f2GGCT_rep_10	24118	44565	44565	0	CGCAGCTCTGGTGGCTCTCGCGGAAGCGAGAGCCGCCAGAGCTGCGACACTCTTTCCCTA	29083.7
TDG_TG_f1TAT_f2TAAT_rep_3	10904	22695	22695	0	CGCAGCTCTATTTAATCTCGCGGAAGCGAGATTAGATAGAGCTGCGACACTCTTTCCCTA	14811.1
TDG_TG_f1ATT_f2ATTG_rep_5	15158	26700	26700	0	CGCAGCTCATTTATTGCTCGCGGAAGCGAGCAATGAATGAGCTGCGACACTCTTTCCCTA	17491.6
TDG_TG_f1ACA_f2ACAT_rep_5	14370	27938	27938	0	CGCAGCTCACATACATCTCGCGGAAGCGAGATGTGTGTGAGCTGCGACACTCTTTCCCTA	18180.7
TDG_TG_f1TGC_f2GTCT_rep_2	23330	45389	45389	0	CGCAGCTCTGCTGTCTCTCGCGGAAGCGAGAGACGGCAGAGCTGCGACACTCTTTCCCTA	29280.3
TDG_TG_f1TCT_f2AACG_rep_6	15390	28630	28630	0	CGCAGCTCTCTTAACGCTCGCGGAAGCGAGCGTTGAGAGAGCTGCGACACTCTTTCCCTA	18464.9
TDG_TG_f1TGA_f2TCGC_rep_1	12042	21335	21335	0	CGCAGCTCTGATTCGCCTCGCGGAAGCGAGGCGAGTCAGAGCTGCGACACTCTTTCCCTA	13644.5
TDG_TG_f1CAT_f2AGAG_rep_1	13574	28980	28980	0	CGCAGCTCCATTAGAGCTCGCGGAAGCGAGCTCTGATGGAGCTGCGACACTCTTTCCCTA	18533.8
TDG_TG_f1CGA_f2TGGG_rep_6	11489	24255	24255	0	CGCAGCTCCGATTGGGCTCGCGGAAGCGAGCCCAGTCGGAGCTGCGACACTCTTTCCCTA	15512
TDG_TG_f1CCC_f2CGAG_rep_9	12529	23878	23878	0	CGCAGCTCCCCTCGAGCTCGCGGAAGCGAGCTCGGGGGGAGCTGCGACACTCTTTCCCTA	15048.9
TDG_TG_f1GTT_f2GAGC_rep_8	17795	34159	34159	0	CGCAGCTCGTTTGAGCCTCGCGGAAGCGAGGCTCGAACGAGCTGCGACACTCTTTCCCTA	21174.3
TDG_TG_f1TAC_f2CCCA_rep_8	11250	23405	23405	0	CGCAGCTCTACTCCCACTCGCGGAAGCGAGTGGGGGTAGAGCTGCGACACTCTTTCCCTA	14598.4
TDG_TG_f1GAA_f2TGTA_rep_8	11376	21059	21059	0	CGCAGCTCGAATTGTACTCGCGGAAGCGAGTACAGTTCGAGCTGCGACACTCTTTCCCTA	12938.8
TDG_TG_f1TCA_f2ACCT_rep_5	11951	24023	24023	0	CGCAGCTCTCATACCTCTCGCGGAAGCGAGAGGTGTGAGAGCTGCGACACTCTTTCCCTA	14745.8
TDG_TG_f1TCT_f2TCCA_rep_6	10738	22858	22858	0	CGCAGCTCTCTTTCCACTCGCGGAAGCGAGTGGAGAGAGAGCTGCGACACTCTTTCCCTA	13848.9
TDG_TG_f1AAT_f2CGCT_rep_9	14075	26715	26715	0	CGCAGCTCAATTCGCTCTCGCGGAAGCGAGAGCGGATTGAGCTGCGACACTCTTTCCCTA	16398.2
TDG_TG_f1CCG_f2TCAT_rep_9	11228	23068	23068	0	CGCAGCTCCCGTTCATCTCGCGGAAGCGAGATGAGCGGGAGCTGCGACACTCTTTCCCTA	14173.2
TDG_TG_f1CCC_f2TATT_rep_8	11197	22094	22094	0	CGCAGCTCCCCTTATTCTCGCGGAAGCGAGAATAGGGGGAGCTGCGACACTCTTTCCCTA	13574.7
TDG_TG_f1AAA_f2ATCC_rep_2	13231	25353	25353	0	CGCAGCTCAAATATCCCTCGCGGAAGCGAGGGATGTTTGAGCTGCGACACTCTTTCCCTA	15720.3
TDG_TG_f1CGA_f2CCAC_rep_10	11417	22712	22712	0	CGCAGCTCCGATCCACCTCGCGGAAGCGAGGTGGGTCGGAGCTGCGACACTCTTTCCCTA	14269.6
TDG_TG_f1CGT_f2TTCT_rep_10	10706	22341	22341	0	CGCAGCTCCGTTTTCTCTCGCGGAAGCGAGAGAAGACGGAGCTGCGACACTCTTTCCCTA	14264
TDG_TG_f1GAA_f2CCTT_rep_7	10312	19336	19336	0	CGCAGCTCGAATCCTTCTCGCGGAAGCGAGAAGGGTTCGAGCTGCGACACTCTTTCCCTA	12467.9
TDG_TG_f1TAA_f2TCGC_rep_8	10129	22106	22106	0	CGCAGCTCTAATTCGCCTCGCGGAAGCGAGGCGAGTTAGAGCTGCGACACTCTTTCCCTA	14427
TDG_TG_f1TAG_f2GAGC_rep_2	20026	39399	39399	0	CGCAGCTCTAGTGAGCCTCGCGGAAGCGAGGCTCGCTAGAGCTGCGACACTCTTTCCCTA	26156.2
TDG_TG_f1CAC_f2AAAT_rep_9	12006	23324	23324	0	CGCAGCTCCACTAAATCTCGCGGAAGCGAGATTTGGTGGAGCTGCGACACTCTTTCCCTA	15712.3
TDG_TG_f1ACT_f2TCTC_rep_6	9582	20582	20582	0	CGCAGCTCACTTTCTCCTCGCGGAAGCGAGGAGAGAGTGAGCTGCGACACTCTTTCCCTA	13865.2
TDG_TG_f1CGC_f2TGGC_rep_4	10392	20538	20538	0	CGCAGCTCCGCTTGGCCTCGCGGAAGCGAGGCCAGGCGGAGCTGCGACACTCTTTCCCTA	13954.7
dBr_3858	12203	22851	22851	0	CGCTTGCTCAACCGAAATCGCGGAAGCGATTTCGGTTGAGCAAGCGACACTCTTTCCCTA	15599.6
TDG_TG_f1ATA_f2CATG_rep_7	10779	20025	20025	0	CGCAGCTCATATCATGCTCGCGGAAGCGAGCATGGTATGAGCTGCGACACTCTTTCCCTA	13749.9
TDG_TG_f1TTA_f2ACGT_rep_4	12010	22459	22459	0	CGCAGCTCTTATACGTCTCGCGGAAGCGAGACGTGTAAGAGCTGCGACACTCTTTCCCTA	15418.1
TDG_TG_f1CAC_f2CGTC_rep_2	12449	22378	22378	0	CGCAGCTCCACTCGTCCTCGCGGAAGCGAGGACGGGTGGAGCTGCGACACTCTTTCCCTA	15276.7
dBr_7077	13098	26814	26814	0	CGCGCGGTACGGTAACTACGCGGAAGCGTAGTTACCGTACCGCGCGACACTCTTTCCCTA	18305
TDG_TG_f1TCG_f2AGAC_rep_4	12257	23627	23627	0	CGCAGCTCTCGTAGACCTCGCGGAAGCGAGGTCTGCGAGAGCTGCGACACTCTTTCCCTA	16110.6
TDG_TG_f1TCG_f2ATGT_rep_5	12052	22911	22911	0	CGCAGCTCTCGTATGTCTCGCGGAAGCGAGACATGCGAGAGCTGCGACACTCTTTCCCTA	15447.6
TDG_TG_f1ATG_f2AAGT_rep_3	12088	25404	25404	0	CGCAGCTCATGTAAGTCTCGCGGAAGCGAGACTTGCATGAGCTGCGACACTCTTTCCCTA	17128.5
TDG_TG_f1GTA_f2CTCT_rep_2	10111	20056	20056	0	CGCAGCTCGTATCTCTCTCGCGGAAGCGAGAGAGGTACGAGCTGCGACACTCTTTCCCTA	13510.8
TDG_TG_f1CGA_f2CCCC_rep_9	11918	20383	20383	0	CGCAGCTCCGATCCCCCTCGCGGAAGCGAGGGGGGTCGGAGCTGCGACACTCTTTCCCTA	13687.7
TDG_TG_f1TCC_f2CCTT_rep_2	10495	22566	22566	0	CGCAGCTCTCCTCCTTCTCGCGGAAGCGAGAAGGGGGAGAGCTGCGACACTCTTTCCCTA	15089.3
TDG_TG_f1TCG_f2CTAG_rep_9	10005	18246	18246	0	CGCAGCTCTCGTCTAGCTCGCGGAAGCGAGCTAGGCGAGAGCTGCGACACTCTTTCCCTA	12048.9
TDG_TG_f1CCG_f2CCCT_rep_8	11461	19124	19124	0	CGCAGCTCCCGTCCCTCTCGCGGAAGCGAGAGGGGCGGGAGCTGCGACACTCTTTCCCTA	12523.4
TDG_TG_f1TGC_f2GTTG_rep_10	17075	35446	35446	0	CGCAGCTCTGCTGTTGCTCGCGGAAGCGAGCAACGGCAGAGCTGCGACACTCTTTCCCTA	23486
TDG_TG_f1AAC_f2TCAT_rep_6	11715	21583	21583	0	CGCAGCTCAACTTCATCTCGCGGAAGCGAGATGAGGTTGAGCTGCGACACTCTTTCCCTA	14378.2
TDG_TG_f1GCC_f2GACC_rep_6	18682	35044	35044	0	CGCAGCTCGCCTGACCCTCGCGGAAGCGAGGGTCGGGCGAGCTGCGACACTCTTTCCCTA	23433
TDG_TG_f1ACC_f2GTTT_rep_7	17928	38836	38836	0	CGCAGCTCACCTGTTTCTCGCGGAAGCGAGAAACGGGTGAGCTGCGACACTCTTTCCCTA	26100.5
TDG_TG_f1CCC_f2TTGC_rep_2	13239	28105	28105	0	CGCAGCTCCCCTTTGCCTCGCGGAAGCGAGGCAAGGGGGAGCTGCGACACTCTTTCCCTA	18894.9
TDG_TG_f1TAT_f2GGAT_rep_4	20583	37485	37485	0	CGCAGCTCTATTGGATCTCGCGGAAGCGAGATCCGATAGAGCTGCGACACTCTTTCCCTA	25314.2
TDG_TG_f1AAG_f2GAGA_rep_8	20129	45329	45329	0	CGCAGCTCAAGTGAGACTCGCGGAAGCGAGTCTCGCTTGAGCTGCGACACTCTTTCCCTA	30576.1
TDG_TG_f1CCC_f2CGCT_rep_4	13667	26664	26664	0	CGCAGCTCCCCTCGCTCTCGCGGAAGCGAGAGCGGGGGGAGCTGCGACACTCTTTCCCTA	18047.5
TDG_TG_f1CAC_f2GAAA_rep_8	18476	32201	32201	0	CGCAGCTCCACTGAAACTCGCGGAAGCGAGTTTCGGTGGAGCTGCGACACTCTTTCCCTA	22291.4
dBr_0909	12407	23431	23431	0	CGCTGACTCGCCCATCGGCGCGGAAGCGCCGATGGGCGAGTCAGCGACACTCTTTCCCTA	16220.3
TDG_TG_f1CGC_f2AGGC_rep_4	13130	24060	24060	0	CGCAGCTCCGCTAGGCCTCGCGGAAGCGAGGCCTGGCGGAGCTGCGACACTCTTTCCCTA	16807
TDG_TG_f1ACC_f2AACT_rep_8	13011	25410	25410	0	CGCAGCTCACCTAACTCTCGCGGAAGCGAGAGTTGGGTGAGCTGCGACACTCTTTCCCTA	17932.1
TDG_TG_f1CAG_f2TCGA_rep_9	11009	23373	23373	0	CGCAGCTCCAGTTCGACTCGCGGAAGCGAGTCGAGCTGGAGCTGCGACACTCTTTCCCTA	16503.8
TDG_TG_f1TGG_f2GCGC_rep_4	27311	53625	53966	0	CGCAGCTCTGGTGCGCCTCGCGGAAGCGAGGCGCGCCAGAGCTGCGACACTCTTTCCCTA	38105.6
dBr_8154	13450	25971	25971	0	CGCGAACGATGGAGTATCCGCGGAAGCGGATACTCCATCGTTCGCGACACTCTTTCCCTA	18233
TDG_TG_f1GAT_f2AGCC_rep_1	16511	33379	33379	0	CGCAGCTCGATTAGCCCTCGCGGAAGCGAGGGCTGATCGAGCTGCGACACTCTTTCCCTA	23569.1
TDG_TG_f1GGT_f2GACG_rep_4	18464	36038	36038	0	CGCAGCTCGGTTGACGCTCGCGGAAGCGAGCGTCGACCGAGCTGCGACACTCTTTCCCTA	25300.5
TDG_TG_f1ATT_f2GCCT_rep_6	19451	37076	37076	0	CGCAGCTCATTTGCCTCTCGCGGAAGCGAGAGGCGAATGAGCTGCGACACTCTTTCCCTA	26179.5
TDG_TG_f1AAG_f2ACCG_rep_7	14620	28679	28679	0	CGCAGCTCAAGTACCGCTCGCGGAAGCGAGCGGTGCTTGAGCTGCGACACTCTTTCCCTA	20187.9
TDG_TG_f1ATG_f2TCAA_rep_8	14842	32715	32715	0	CGCAGCTCATGTTCAACTCGCGGAAGCGAGTTGAGCATGAGCTGCGACACTCTTTCCCTA	23308.4
TDG_TG_f1GTC_f2CCTC_rep_5	11255	24647	24647	0	CGCAGCTCGTCTCCTCCTCGCGGAAGCGAGGAGGGGACGAGCTGCGACACTCTTTCCCTA	17647.9
TDG_TG_f1AAC_f2CCCC_rep_2	11701	22494	22494	0	CGCAGCTCAACTCCCCCTCGCGGAAGCGAGGGGGGGTTGAGCTGCGACACTCTTTCCCTA	16277.7
TDG_TG_f1CGC_f2TCTA_rep_5	11006	18823	18823	0	CGCAGCTCCGCTTCTACTCGCGGAAGCGAGTAGAGGCGGAGCTGCGACACTCTTTCCCTA	13670.7
TDG_TG_f1ATC_f2GGGA_rep_7	15984	36782	36782	0	CGCAGCTCATCTGGGACTCGCGGAAGCGAGTCCCGGATGAGCTGCGACACTCTTTCCCTA	26775
TDG_TG_f1GTG_f2CCCG_rep_9	10048	20775	20775	0	CGCAGCTCGTGTCCCGCTCGCGGAAGCGAGCGGGGCACGAGCTGCGACACTCTTTCCCTA	15467
TDG_TG_f1TGC_f2GGTA_rep_9	17054	29251	29251	0	CGCAGCTCTGCTGGTACTCGCGGAAGCGAGTACCGGCAGAGCTGCGACACTCTTTCCCTA	21982.5
TDG_TG_f1TAC_f2GGTC_rep_8	16473	31562	31562	0	CGCAGCTCTACTGGTCCTCGCGGAAGCGAGGACCGGTAGAGCTGCGACACTCTTTCCCTA	23682.1
TDG_TG_f1ACC_f2TGGA_rep_8	9011	19920	19920	0	CGCAGCTCACCTTGGACTCGCGGAAGCGAGTCCAGGGTGAGCTGCGACACTCTTTCCCTA	15124.6
TDG_TG_f1GGT_f2TGGA_rep_1	10293	16062	16062	0	CGCAGCTCGGTTTGGACTCGCGGAAGCGAGTCCAGACCGAGCTGCGACACTCTTTCCCTA	12386.3
TDG_TG_f1GGT_f2TGAG_rep_4	9612	18158	18158	0	CGCAGCTCGGTTTGAGCTCGCGGAAGCGAGCTCAGACCGAGCTGCGACACTCTTTCCCTA	14198.4
TDG_TG_f1CCC_f2TTTT_rep_4	9904	20921	20921	0	CGCAGCTCCCCTTTTTCTCGCGGAAGCGAGAAAAGGGGGAGCTGCGACACTCTTTCCCTA	16632.9
TDG_TG_f1TCT_f2ATAA_rep_4	9532	17901	17901	0	CGCAGCTCTCTTATAACTCGCGGAAGCGAGTTATGAGAGAGCTGCGACACTCTTTCCCTA	14544.8
dBr_3086	11082	22478	22478	0	CGCGAAAACTGAACGTTGCGCGGAAGCGCAACGTTCAGTTTTCGCGACACTCTTTCCCTA	18485.5
TDG_TG_f1AAC_f2GAAC_rep_8	14983	31298	31298	0	CGCAGCTCAACTGAACCTCGCGGAAGCGAGGTTCGGTTGAGCTGCGACACTCTTTCCCTA	26294.9
TDG_TG_f1AGG_f2TGCC_rep_9	9904	17636	17636	0	CGCAGCTCAGGTTGCCCTCGCGGAAGCGAGGGCAGCCTGAGCTGCGACACTCTTTCCCTA	14851.3
TDG_TG_f1GTA_f2GTAG_rep_3	17164	30933	30933	0	CGCAGCTCGTATGTAGCTCGCGGAAGCGAGCTACGTACGAGCTGCGACACTCTTTCCCTA	26242.5
TDG_TG_f1CCA_f2ACGC_rep_3	10938	21567	21567	0	CGCAGCTCCCATACGCCTCGCGGAAGCGAGGCGTGTGGGAGCTGCGACACTCTTTCCCTA	18484
TDG_TG_f1GTA_f2GCTC_rep_8	15516	27968	27968	0	CGCAGCTCGTATGCTCCTCGCGGAAGCGAGGAGCGTACGAGCTGCGACACTCTTTCCCTA	24557.5
dBr_6979	9599	20364	20364	0	CGCAAGAATTTCGTACTCCGCGGAAGCGGAGTACGAAATTCTTGCGACACTCTTTCCCTA	18416.4
TDG_TG_f1TTT_f2ATGT_rep_3	8386	17727	17727	0	CGCAGCTCTTTTATGTCTCGCGGAAGCGAGACATGAAAGAGCTGCGACACTCTTTCCCTA	16446.8
TDG_TG_f1AGG_f2CGTT_rep_7	9462	15803	15803	0	CGCAGCTCAGGTCGTTCTCGCGGAAGCGAGAACGGCCTGAGCTGCGACACTCTTTCCCTA	14811.3
TDG_TG_f1TAC_f2TCAT_rep_9	7308	15895	15895	0	CGCAGCTCTACTTCATCTCGCGGAAGCGAGATGAGGTAGAGCTGCGACACTCTTTCCCTA	14996
TDG_TG_f1CGG_f2GCTC_rep_8	17164	32691	32691	0	CGCAGCTCCGGTGCTCCTCGCGGAAGCGAGGAGCGCCGGAGCTGCGACACTCTTTCCCTA	31020.2
TDG_TG_f1GGC_f2GAAA_rep_10	11949	19979	19979	0	CGCAGCTCGGCTGAAACTCGCGGAAGCGAGTTTCGGCCGAGCTGCGACACTCTTTCCCTA	19140.6
TDG_TG_f1GAA_f2TCTC_rep_2	6586	13742	13742	0	CGCAGCTCGAATTCTCCTCGCGGAAGCGAGGAGAGTTCGAGCTGCGACACTCTTTCCCTA	13530.3
TDG_TG_f1CTC_f2TCTT_rep_7	6377	13146	13146	0	CGCAGCTCCTCTTCTTCTCGCGGAAGCGAGAAGAGGAGGAGCTGCGACACTCTTTCCCTA	13045.1
TDG_TG_f1GCC_f2GAAT_rep_9	11366	20176	20176	0	CGCAGCTCGCCTGAATCTCGCGGAAGCGAGATTCGGGCGAGCTGCGACACTCTTTCCCTA	20083.8
TDG_TG_f1TAT_f2GGCG_rep_10	14653	29626	29626	0	CGCAGCTCTATTGGCGCTCGCGGAAGCGAGCGCCGATAGAGCTGCGACACTCTTTCCCTA	29587.7
TDG_TG_f1CCC_f2TGGT_rep_10	6626	13175	13175	0	CGCAGCTCCCCTTGGTCTCGCGGAAGCGAGACCAGGGGGAGCTGCGACACTCTTTCCCTA	13142.5
TDG_TG_f1AAA_f2GTTG_rep_6	11637	21331	21331	0	CGCAGCTCAAATGTTGCTCGCGGAAGCGAGCAACGTTTGAGCTGCGACACTCTTTCCCTA	21202.5
TDG_TG_f1TCA_f2CGCA_rep_8	8412	16115	16115	0	CGCAGCTCTCATCGCACTCGCGGAAGCGAGTGCGGTGAGAGCTGCGACACTCTTTCCCTA	16016.1
TDG_TG_f1AAG_f2TTAC_rep_7	6783	15431	15431	0	CGCAGCTCAAGTTTACCTCGCGGAAGCGAGGTAAGCTTGAGCTGCGACACTCTTTCCCTA	15302.7
TDG_TG_f1TCG_f2GTGC_rep_10	12314	22604	22604	0	CGCAGCTCTCGTGTGCCTCGCGGAAGCGAGGCACGCGAGAGCTGCGACACTCTTTCCCTA	22466.5
TDG_TG_f1CGA_f2ACCG_rep_10	9339	19764	19764	0	CGCAGCTCCGATACCGCTCGCGGAAGCGAGCGGTGTCGGAGCTGCGACACTCTTTCCCTA	19682.9
TDG_TG_f1TCG_f2GTTA_rep_3	11458	23045	23045	0	CGCAGCTCTCGTGTTACTCGCGGAAGCGAGTAACGCGAGAGCTGCGACACTCTTTCCCTA	22904.9
TDG_TG_f1CGA_f2ATTG_rep_2	8560	18635	18635	0	CGCAGCTCCGATATTGCTCGCGGAAGCGAGCAATGTCGGAGCTGCGACACTCTTTCCCTA	18540.1
TDG_TG_f1GGA_f2GTGG_rep_9	9836	20889	20889	0	CGCAGCTCGGATGTGGCTCGCGGAAGCGAGCCACGTCCGAGCTGCGACACTCTTTCCCTA	20762
dBr_7681	10680	18638	18638	0	CGCCGTTGAAAGCGTCCGCGCGGAAGCGCGGACGCTTTCAACGGCGACACTCTTTCCCTA	18499.8
TDG_TG_f1ATA_f2GTAT_rep_5	14974	31132	31132	0	CGCAGCTCATATGTATCTCGCGGAAGCGAGATACGTATGAGCTGCGACACTCTTTCCCTA	30482.8
TDG_TG_f1GGA_f2GCTA_rep_10	12678	25273	25273	0	CGCAGCTCGGATGCTACTCGCGGAAGCGAGTAGCGTCCGAGCTGCGACACTCTTTCCCTA	24622.6
TDG_TG_f1CGC_f2AATG_rep_6	9329	16794	16794	0	CGCAGCTCCGCTAATGCTCGCGGAAGCGAGCATTGGCGGAGCTGCGACACTCTTTCCCTA	16361.8
TDG_TG_f1CCA_f2ATCT_rep_7	9234	18688	18688	0	CGCAGCTCCCATATCTCTCGCGGAAGCGAGAGATGTGGGAGCTGCGACACTCTTTCCCTA	18330
TDG_TG_linker_1_rep_5	19097	39132	39132	0	CGCAGCTCCAGTGTATCTCGCGGAAGCGAGATACGCTGGAGCTGCGCCAAAGGCGCAGTT	38322.6
TDG_TG_f1AGA_f2TCTC_rep_8	7070	11806	11806	0	CGCAGCTCAGATTCTCCTCGCGGAAGCGAGGAGAGTCTGAGCTGCGACACTCTTTCCCTA	11533.2
TDG_TG_f1GTA_f2TAGT_rep_1	6891	14688	14688	0	CGCAGCTCGTATTAGTCTCGCGGAAGCGAGACTAGTACGAGCTGCGACACTCTTTCCCTA	14363.9
TDG_TG_f1CAA_f2GACG_rep_10	14245	28173	28173	0	CGCAGCTCCAATGACGCTCGCGGAAGCGAGCGTCGTTGGAGCTGCGACACTCTTTCCCTA	27447.9
TDG_TG_f1GTC_f2GCGA_rep_6	13620	26815	26815	0	CGCAGCTCGTCTGCGACTCGCGGAAGCGAGTCGCGGACGAGCTGCGACACTCTTTCCCTA	26251.3
TDG_TG_f1ACA_f2TACT_rep_5	6986	14556	14556	0	CGCAGCTCACATTACTCTCGCGGAAGCGAGAGTAGTGTGAGCTGCGACACTCTTTCCCTA	14200.5
TDG_TG_f1CGA_f2TTGC_rep_6	7961	15733	15733	0	CGCAGCTCCGATTTGCCTCGCGGAAGCGAGGCAAGTCGGAGCTGCGACACTCTTTCCCTA	15385.9
TDG_TG_f1CTG_f2ACTG_rep_10	8727	17164	17164	0	CGCAGCTCCTGTACTGCTCGCGGAAGCGAGCAGTGCAGGAGCTGCGACACTCTTTCCCTA	16617
TDG_TG_f1ATG_f2GCCT_rep_7	18506	39271	39271	0	CGCAGCTCATGTGCCTCTCGCGGAAGCGAGAGGCGCATGAGCTGCGACACTCTTTCCCTA	37626.2
TDG_TG_f1ATA_f2GACT_rep_8	14599	30275	30275	0	CGCAGCTCATATGACTCTCGCGGAAGCGAGAGTCGTATGAGCTGCGACACTCTTTCCCTA	28946.6
TDG_TG_f1CTA_f2GAGC_rep_3	11672	23242	23242	0	CGCAGCTCCTATGAGCCTCGCGGAAGCGAGGCTCGTAGGAGCTGCGACACTCTTTCCCTA	22135.1
TDG_TG_f1AGA_f2GAGA_rep_10	10840	21646	21646	0	CGCAGCTCAGATGAGACTCGCGGAAGCGAGTCTCGTCTGAGCTGCGACACTCTTTCCCTA	20562.1
TDG_TG_f1GGA_f2AATG_rep_3	9332	17685	17685	0	CGCAGCTCGGATAATGCTCGCGGAAGCGAGCATTGTCCGAGCTGCGACACTCTTTCCCTA	16679.2
TDG_TG_f1ACG_f2CGAA_rep_6	8744	17064	17064	0	CGCAGCTCACGTCGAACTCGCGGAAGCGAGTTCGGCGTGAGCTGCGACACTCTTTCCCTA	16063.2
TDG_TG_f1AAT_f2AACT_rep_5	9367	19306	19306	0	CGCAGCTCAATTAACTCTCGCGGAAGCGAGAGTTGATTGAGCTGCGACACTCTTTCCCTA	17948
TDG_TG_f1TAG_f2CGGA_rep_2	8939	16289	16289	0	CGCAGCTCTAGTCGGACTCGCGGAAGCGAGTCCGGCTAGAGCTGCGACACTCTTTCCCTA	15144.1
TDG_TG_f1TCG_f2GCTC_rep_4	13814	27574	27574	0	CGCAGCTCTCGTGCTCCTCGCGGAAGCGAGGAGCGCGAGAGCTGCGACACTCTTTCCCTA	25171.9
TDG_TG_f1TCG_f2ATGA_rep_10	8788	16593	16593	0	CGCAGCTCTCGTATGACTCGCGGAAGCGAGTCATGCGAGAGCTGCGACACTCTTTCCCTA	15170.3
TDG_TG_f1GCC_f2CTGA_rep_3	7886	14313	14313	0	CGCAGCTCGCCTCTGACTCGCGGAAGCGAGTCAGGGGCGAGCTGCGACACTCTTTCCCTA	12866.4
dBr_4246	9335	19511	19511	0	CGCCGCGGTCATGCTCCACGCGGAAGCGTGGAGCATGACCGCGGCGACACTCTTTCCCTA	17523.3
TDG_TG_f1CAT_f2TACA_rep_5	8562	18673	18673	0	CGCAGCTCCATTTACACTCGCGGAAGCGAGTGTAGATGGAGCTGCGACACTCTTTCCCTA	16587.1
TDG_TG_f1TCC_f2TGTC_rep_10	7879	15319	15319	0	CGCAGCTCTCCTTGTCCTCGCGGAAGCGAGGACAGGGAGAGCTGCGACACTCTTTCCCTA	13585.4
TDG_TG_f1CAG_f2AACC_rep_7	10027	23550	23550	0	CGCAGCTCCAGTAACCCTCGCGGAAGCGAGGGTTGCTGGAGCTGCGACACTCTTTCCCTA	20882.7
TDG_TG_f1GGT_f2GTCA_rep_1	14502	29876	29876	0	CGCAGCTCGGTTGTCACTCGCGGAAGCGAGTGACGACCGAGCTGCGACACTCTTTCCCTA	26314.4
TDG_TG_f1AAA_f2CCGG_rep_5	7529	15929	15929	0	CGCAGCTCAAATCCGGCTCGCGGAAGCGAGCCGGGTTTGAGCTGCGACACTCTTTCCCTA	14010.8
TDG_TG_f1TGG_f2CGGA_rep_5	9468	17458	17458	0	CGCAGCTCTGGTCGGACTCGCGGAAGCGAGTCCGGCCAGAGCTGCGACACTCTTTCCCTA	15265.6
TDG_TG_f1GTT_f2CTAG_rep_2	7614	16239	16239	0	CGCAGCTCGTTTCTAGCTCGCGGAAGCGAGCTAGGAACGAGCTGCGACACTCTTTCCCTA	14137.2
TDG_TG_f1TCA_f2GAAA_rep_2	11772	19935	19935	0	CGCAGCTCTCATGAAACTCGCGGAAGCGAGTTTCGTGAGAGCTGCGACACTCTTTCCCTA	17153.6
TDG_TG_f1GTC_f2CTCG_rep_10	8750	17325	17325	0	CGCAGCTCGTCTCTCGCTCGCGGAAGCGAGCGAGGGACGAGCTGCGACACTCTTTCCCTA	14870.9
TDG_TG_f1CAA_f2AGGG_rep_3	9123	18703	18703	0	CGCAGCTCCAATAGGGCTCGCGGAAGCGAGCCCTGTTGGAGCTGCGACACTCTTTCCCTA	16008.4
TDG_TG_f1GCA_f2GGCA_rep_8	14117	28584	28584	0	CGCAGCTCGCATGGCACTCGCGGAAGCGAGTGCCGTGCGAGCTGCGACACTCTTTCCCTA	24521.4
TDG_TG_f1GGA_f2ATAA_rep_7	9169	19332	19332	0	CGCAGCTCGGATATAACTCGCGGAAGCGAGTTATGTCCGAGCTGCGACACTCTTTCCCTA	16774
TDG_TG_f1TTG_f2TGCA_rep_8	9518	19672	19672	0	CGCAGCTCTTGTTGCACTCGCGGAAGCGAGTGCAGCAAGAGCTGCGACACTCTTTCCCTA	17021.7
TDG_TG_f1GGG_f2CCGG_rep_4	8229	15430	15430	0	CGCAGCTCGGGTCCGGCTCGCGGAAGCGAGCCGGGCCCGAGCTGCGACACTCTTTCCCTA	13299.4
TDG_TG_f1ATG_f2GGGT_rep_4	20274	38473	38473	0	CGCAGCTCATGTGGGTCTCGCGGAAGCGAGACCCGCATGAGCTGCGACACTCTTTCCCTA	32994.9
TDG_TG_f1GCA_f2ACTA_rep_3	9157	18180	18180	0	CGCAGCTCGCATACTACTCGCGGAAGCGAGTAGTGTGCGAGCTGCGACACTCTTTCCCTA	15634
TDG_TG_f1TAG_f2TATT_rep_9	6948	14114	14114	0	CGCAGCTCTAGTTATTCTCGCGGAAGCGAGAATAGCTAGAGCTGCGACACTCTTTCCCTA	12006.2
TDG_TG_f1AAG_f2AGCC_rep_9	13646	25281	25281	0	CGCAGCTCAAGTAGCCCTCGCGGAAGCGAGGGCTGCTTGAGCTGCGACACTCTTTCCCTA	21238.7
TDG_TG_f1ATG_f2TCAG_rep_1	7722	16071	16071	0	CGCAGCTCATGTTCAGCTCGCGGAAGCGAGCTGAGCATGAGCTGCGACACTCTTTCCCTA	13325.8
TDG_TG_f1AGG_f2AGTC_rep_7	11958	22254	22254	0	CGCAGCTCAGGTAGTCCTCGCGGAAGCGAGGACTGCCTGAGCTGCGACACTCTTTCCCTA	18452.6
TDG_TG_f1CGG_f2GACT_rep_5	18088	35084	35084	0	CGCAGCTCCGGTGACTCTCGCGGAAGCGAGAGTCGCCGGAGCTGCGACACTCTTTCCCTA	29316.3
TDG_TG_f1TGA_f2GAGT_rep_7	10078	21823	21823	0	CGCAGCTCTGATGAGTCTCGCGGAAGCGAGACTCGTCAGAGCTGCGACACTCTTTCCCTA	18293.8
TDG_TG_f1GGA_f2GTAT_rep_4	13342	25402	25402	0	CGCAGCTCGGATGTATCTCGCGGAAGCGAGATACGTCCGAGCTGCGACACTCTTTCCCTA	21247.9
TDG_TG_f1GAT_f2TTCT_rep_10	8700	18177	18177	0	CGCAGCTCGATTTTCTCTCGCGGAAGCGAGAGAAGATCGAGCTGCGACACTCTTTCCCTA	15237.4
TDG_TG_f1TAC_f2TGCC_rep_6	8515	16136	16136	0	CGCAGCTCTACTTGCCCTCGCGGAAGCGAGGGCAGGTAGAGCTGCGACACTCTTTCCCTA	13593.6
TDG_TG_f1GAC_f2GGAA_rep_8	14943	28694	28694	0	CGCAGCTCGACTGGAACTCGCGGAAGCGAGTTCCGGTCGAGCTGCGACACTCTTTCCCTA	23985
TDG_TG_f1TGC_f2GAGT_rep_6	12083	24018	24018	0	CGCAGCTCTGCTGAGTCTCGCGGAAGCGAGACTCGGCAGAGCTGCGACACTCTTTCCCTA	19587.1
TDG_TG_f1ACT_f2CCCG_rep_10	10541	20169	20169	0	CGCAGCTCACTTCCCGCTCGCGGAAGCGAGCGGGGAGTGAGCTGCGACACTCTTTCCCTA	16303.4
TDG_TG_f1CCC_f2ACCC_rep_8	13319	23393	23393	0	CGCAGCTCCCCTACCCCTCGCGGAAGCGAGGGGTGGGGGAGCTGCGACACTCTTTCCCTA	18738.9
TDG_TG_f1AGC_f2TATT_rep_7	8590	17747	17747	0	CGCAGCTCAGCTTATTCTCGCGGAAGCGAGAATAGGCTGAGCTGCGACACTCTTTCCCTA	14149.8
TDG_TG_f1TAC_f2GGTG_rep_3	16586	33461	33461	0	CGCAGCTCTACTGGTGCTCGCGGAAGCGAGCACCGGTAGAGCTGCGACACTCTTTCCCTA	26585.2
TDG_TG_f1ATC_f2TGGC_rep_9	9238	15853	15853	0	CGCAGCTCATCTTGGCCTCGCGGAAGCGAGGCCAGGATGAGCTGCGACACTCTTTCCCTA	12592.5
TDG_TG_f1GCG_f2TTGA_rep_6	9651	22366	22366	0	CGCAGCTCGCGTTTGACTCGCGGAAGCGAGTCAAGCGCGAGCTGCGACACTCTTTCCCTA	17765.9
TDG_TG_f1CCC_f2ACGC_rep_7	12401	26057	26057	0	CGCAGCTCCCCTACGCCTCGCGGAAGCGAGGCGTGGGGGAGCTGCGACACTCTTTCCCTA	20009.5
TDG_TG_f1GCG_f2AGCG_rep_9	14182	25299	25299	0	CGCAGCTCGCGTAGCGCTCGCGGAAGCGAGCGCTGCGCGAGCTGCGACACTCTTTCCCTA	19075.4
TDG_TG_f1CTC_f2CTGC_rep_3	10153	20262	20262	0	CGCAGCTCCTCTCTGCCTCGCGGAAGCGAGGCAGGGAGGAGCTGCGACACTCTTTCCCTA	15169.5
TDG_TG_f1TCA_f2TCCG_rep_4	11668	22705	22705	0	CGCAGCTCTCATTCCGCTCGCGGAAGCGAGCGGAGTGAGAGCTGCGACACTCTTTCCCTA	16572.2
TDG_TG_f1AGC_f2ATGT_rep_8	12209	23349	23349	0	CGCAGCTCAGCTATGTCTCGCGGAAGCGAGACATGGCTGAGCTGCGACACTCTTTCCCTA	16926
TDG_TG_f1CAG_f2GGAT_rep_4	24620	48695	48695	0	CGCAGCTCCAGTGGATCTCGCGGAAGCGAGATCCGCTGGAGCTGCGACACTCTTTCCCTA	34653.7
TDG_TG_f1GCC_f2AAAA_rep_10	12580	28176	28176	0	CGCAGCTCGCCTAAAACTCGCGGAAGCGAGTTTTGGGCGAGCTGCGACACTCTTTCCCTA	19625.7
TDG_TG_f1CCC_f2AGGG_rep_2	13382	22978	22978	0	CGCAGCTCCCCTAGGGCTCGCGGAAGCGAGCCCTGGGGGAGCTGCGACACTCTTTCCCTA	15834.5
TDG_TG_f1TGT_f2CTCT_rep_6	10336	21538	21538	0	CGCAGCTCTGTTCTCTCTCGCGGAAGCGAGAGAGGACAGAGCTGCGACACTCTTTCCCTA	14625.1
TDG_TG_f1GCC_f2CGTC_rep_1	13632	29236	29236	0	CGCAGCTCGCCTCGTCCTCGCGGAAGCGAGGACGGGGCGAGCTGCGACACTCTTTCCCTA	19505.6
TDG_TG_f1TTG_f2TCAA_rep_2	11801	21951	21951	0	CGCAGCTCTTGTTCAACTCGCGGAAGCGAGTTGAGCAAGAGCTGCGACACTCTTTCCCTA	14506.3
TDG_TG_f1AAC_f2TCGG_rep_4	14000	25749	25749	0	CGCAGCTCAACTTCGGCTCGCGGAAGCGAGCCGAGGTTGAGCTGCGACACTCTTTCCCTA	16933.2
TDG_TG_f1GAC_f2TAAA_rep_8	12084	27404	27404	0	CGCAGCTCGACTTAAACTCGCGGAAGCGAGTTTAGGTCGAGCTGCGACACTCTTTCCCTA	17823
TDG_TG_f1AGT_f2CTGG_rep_6	11723	22648	22648	0	CGCAGCTCAGTTCTGGCTCGCGGAAGCGAGCCAGGACTGAGCTGCGACACTCTTTCCCTA	14668.6
TDG_TG_f1CTG_f2ACTA_rep_5	15060	28762	28762	0	CGCAGCTCCTGTACTACTCGCGGAAGCGAGTAGTGCAGGAGCTGCGACACTCTTTCCCTA	18211.4
TDG_TG_f1CTT_f2AAAG_rep_1	13743	27691	27691	0	CGCAGCTCCTTTAAAGCTCGCGGAAGCGAGCTTTGAAGGAGCTGCGACACTCTTTCCCTA	17388.8
TDG_TG_f1CTA_f2GATC_rep_3	20839	38767	38767	0	CGCAGCTCCTATGATCCTCGCGGAAGCGAGGATCGTAGGAGCTGCGACACTCTTTCCCTA	24074.6
TDG_TG_random_1TG_9_rep_5	13041	26502	26502	0	CGCACATTCTTGCTAAGCCGCGGAAGCGGCTTAGCAAGAGTGTGCGACACTCTTTCCCTA	16422
TDG_TG_f1TTA_f2CAGC_rep_8	13407	26520	26520	0	CGCAGCTCTTATCAGCCTCGCGGAAGCGAGGCTGGTAAGAGCTGCGACACTCTTTCCCTA	16433.1
TDG_TG_f1CAC_f2GATT_rep_9	23352	42838	42838	0	CGCAGCTCCACTGATTCTCGCGGAAGCGAGAATCGGTGGAGCTGCGACACTCTTTCCCTA	26650
TDG_TG_f1TGG_f2AGAA_rep_4	17386	29914	29914	0	CGCAGCTCTGGTAGAACTCGCGGAAGCGAGTTCTGCCAGAGCTGCGACACTCTTTCCCTA	18694.3
dBr_6538	13420	28459	28459	0	CGCGGGCTTCTATGGTAACGCGGAAGCGTTACCATAGAAGCCCGCGACACTCTTTCCCTA	17998.1
TDG_TG_f1AAG_f2GAGG_rep_2	23653	49770	49770	0	CGCAGCTCAAGTGAGGCTCGCGGAAGCGAGCCTCGCTTGAGCTGCGACACTCTTTCCCTA	31330
TDG_TG_f1GGT_f2CCTA_rep_1	14223	22944	22944	0	CGCAGCTCGGTTCCTACTCGCGGAAGCGAGTAGGGACCGAGCTGCGACACTCTTTCCCTA	14478.5
TDG_TG_f1ACA_f2GATA_rep_5	26870	58568	53107	0	CGCAGCTCACATGATACTCGCGGAAGCGAGTATCGTGTGAGCTGCGACACTCTTTCCCTA	33651.2
TDG_TG_f1ATA_f2ATTC_rep_5	12427	25625	25625	0	CGCAGCTCATATATTCCTCGCGGAAGCGAGGAATGTATGAGCTGCGACACTCTTTCCCTA	16237.3
TDG_TG_f1TTA_f2CCTA_rep_1	11574	20765	20765	0	CGCAGCTCTTATCCTACTCGCGGAAGCGAGTAGGGTAAGAGCTGCGACACTCTTTCCCTA	13345.8
TDG_TG_f1ATA_f2ATAA_rep_5	13522	26908	26908	0	CGCAGCTCATATATAACTCGCGGAAGCGAGTTATGTATGAGCTGCGACACTCTTTCCCTA	17382
TDG_TG_f1AGT_f2TGGA_rep_5	12072	22167	22167	0	CGCAGCTCAGTTTGGACTCGCGGAAGCGAGTCCAGACTGAGCTGCGACACTCTTTCCCTA	14365.3
TDG_TG_f1TAG_f2TCAA_rep_3	11583	22095	22095	0	CGCAGCTCTAGTTCAACTCGCGGAAGCGAGTTGAGCTAGAGCTGCGACACTCTTTCCCTA	14468.7
TDG_TG_f1CCC_f2AACT_rep_10	14654	30302	30302	0	CGCAGCTCCCCTAACTCTCGCGGAAGCGAGAGTTGGGGGAGCTGCGACACTCTTTCCCTA	19849.8
TDG_TG_f1CCA_f2TGCC_rep_2	13571	27350	27350	0	CGCAGCTCCCATTGCCCTCGCGGAAGCGAGGGCAGTGGGAGCTGCGACACTCTTTCCCTA	17940.9
TDG_TG_f1AGA_f2ACTT_rep_4	12995	26038	26038	0	CGCAGCTCAGATACTTCTCGCGGAAGCGAGAAGTGTCTGAGCTGCGACACTCTTTCCCTA	17023.8
TDG_TG_f1GGT_f2TGGT_rep_7	12398	26534	26534	0	CGCAGCTCGGTTTGGTCTCGCGGAAGCGAGACCAGACCGAGCTGCGACACTCTTTCCCTA	17213.7
TDG_TG_f1AAC_f2ACTT_rep_9	14035	24198	24198	0	CGCAGCTCAACTACTTCTCGCGGAAGCGAGAAGTGGTTGAGCTGCGACACTCTTTCCCTA	15851.3
TDG_TG_f1CTA_f2TAAC_rep_3	12169	26319	26319	0	CGCAGCTCCTATTAACCTCGCGGAAGCGAGGTTAGTAGGAGCTGCGACACTCTTTCCCTA	17246.7
TDG_TG_f1TTT_f2CTTT_rep_10	10759	22510	22510	0	CGCAGCTCTTTTCTTTCTCGCGGAAGCGAGAAAGGAAAGAGCTGCGACACTCTTTCCCTA	14808.6
TDG_TG_f1CAT_f2TTGG_rep_10	14970	25576	25576	0	CGCAGCTCCATTTTGGCTCGCGGAAGCGAGCCAAGATGGAGCTGCGACACTCTTTCCCTA	16894.6
TDG_TG_f1CGT_f2TGTT_rep_2	13421	28318	28318	0	CGCAGCTCCGTTTGTTCTCGCGGAAGCGAGAACAGACGGAGCTGCGACACTCTTTCCCTA	18841.3
TDG_TG_f1TAA_f2ATCC_rep_10	14554	29005	29005	0	CGCAGCTCTAATATCCCTCGCGGAAGCGAGGGATGTTAGAGCTGCGACACTCTTTCCCTA	19672.7
TDG_TG_f1GGT_f2AATA_rep_10	15680	25060	25060	0	CGCAGCTCGGTTAATACTCGCGGAAGCGAGTATTGACCGAGCTGCGACACTCTTTCCCTA	17038.5
TDG_TG_f1TGC_f2CTGA_rep_1	11750	25755	25755	0	CGCAGCTCTGCTCTGACTCGCGGAAGCGAGTCAGGGCAGAGCTGCGACACTCTTTCCCTA	18090.7
TDG_TG_f1GCA_f2TCCT_rep_10	12750	27317	27317	0	CGCAGCTCGCATTCCTCTCGCGGAAGCGAGAGGAGTGCGAGCTGCGACACTCTTTCCCTA	19720.4
TDG_TG_f1AGC_f2CGCG_rep_1	15042	27278	27278	0	CGCAGCTCAGCTCGCGCTCGCGGAAGCGAGCGCGGGCTGAGCTGCGACACTCTTTCCCTA	19779.6
TDG_TG_f1GTT_f2TGAT_rep_1	11966	22151	22151	0	CGCAGCTCGTTTTGATCTCGCGGAAGCGAGATCAGAACGAGCTGCGACACTCTTTCCCTA	17304
TDG_TG_f1GAC_f2CTAT_rep_5	11757	21758	21758	0	CGCAGCTCGACTCTATCTCGCGGAAGCGAGATAGGGTCGAGCTGCGACACTCTTTCCCTA	17731.3
TDG_TG_f1GCC_f2AGCA_rep_7	14979	31134	31134	0	CGCAGCTCGCCTAGCACTCGCGGAAGCGAGTGCTGGGCGAGCTGCGACACTCTTTCCCTA	25983.7
dBr_5992	11464	20455	20455	0	CGCTGGAACCGTTATATACGCGGAAGCGTATATAACGGTTCCAGCGACACTCTTTCCCTA	17523.4
TDG_TG_f1GTG_f2TCGG_rep_8	11575	21059	21059	0	CGCAGCTCGTGTTCGGCTCGCGGAAGCGAGCCGAGCACGAGCTGCGACACTCTTTCCCTA	18521.6
TDG_TG_f1TGA_f2GTGA_rep_8	14706	28258	28258	0	CGCAGCTCTGATGTGACTCGCGGAAGCGAGTCACGTCAGAGCTGCGACACTCTTTCCCTA	25559.5
TDG_TG_f1GCG_f2ACTG_rep_3	10972	20913	20913	0	CGCAGCTCGCGTACTGCTCGCGGAAGCGAGCAGTGCGCGAGCTGCGACACTCTTTCCCTA	19458
TDG_TG_f1GAG_f2TCAA_rep_7	9451	15345	15345	0	CGCAGCTCGAGTTCAACTCGCGGAAGCGAGTTGAGCTCGAGCTGCGACACTCTTTCCCTA	14561.9
TDG_TG_f1GTC_f2GCTT_rep_3	16497	34634	34634	0	CGCAGCTCGTCTGCTTCTCGCGGAAGCGAGAAGCGGACGAGCTGCGACACTCTTTCCCTA	33352.6
TDG_TG_f1AGC_f2CAAC_rep_5	8766	16588	16588	0	CGCAGCTCAGCTCAACCTCGCGGAAGCGAGGTTGGGCTGAGCTGCGACACTCTTTCCCTA	16419
TDG_TG_f1CAT_f2ATTG_rep_3	10966	19656	19656	0	CGCAGCTCCATTATTGCTCGCGGAAGCGAGCAATGATGGAGCTGCGACACTCTTTCCCTA	20092.2
TDG_TG_f1ATA_f2CTGT_rep_2	6607	12906	12906	0	CGCAGCTCATATCTGTCTCGCGGAAGCGAGACAGGTATGAGCTGCGACACTCTTTCCCTA	13843.9
TDG_TG_f1GCC_f2TTTG_rep_1	7771	12370	12370	0	CGCAGCTCGCCTTTTGCTCGCGGAAGCGAGCAAAGGGCGAGCTGCGACACTCTTTCCCTA	13450.6
TDG_TG_f1TTG_f2TCGT_rep_7	7091	11551	11551	0	CGCAGCTCTTGTTCGTCTCGCGGAAGCGAGACGAGCAAGAGCTGCGACACTCTTTCCCTA	12702.7
TDG_TG_f1TTA_f2GTTC_rep_5	11774	23642	23642	0	CGCAGCTCTTATGTTCCTCGCGGAAGCGAGGAACGTAAGAGCTGCGACACTCTTTCCCTA	26839.6
TDG_TG_f1CCA_f2TGGG_rep_10	14376	25995	25995	0	CGCAGCTCCCATTGGGCTCGCGGAAGCGAGCCCAGTGGGAGCTGCGACACTCTTTCCCTA	15051
TDG_TG_f1GAT_f2GACC_rep_7	26342	53211	52078	0	CGCAGCTCGATTGACCCTCGCGGAAGCGAGGGTCGATCGAGCTGCGACACTCTTTCCCTA	30125.2
TDG_TG_f1AAG_f2GCCC_rep_9	33539	62445	66103	0	CGCAGCTCAAGTGCCCCTCGCGGAAGCGAGGGGCGCTTGAGCTGCGACACTCTTTCCCTA	38060.7
TDG_TG_f1GCG_f2AACC_rep_6	18980	35743	35743	0	CGCAGCTCGCGTAACCCTCGCGGAAGCGAGGGTTGCGCGAGCTGCGACACTCTTTCCCTA	20356
TDG_TG_f1GAC_f2GATT_rep_7	25168	44046	44046	0	CGCAGCTCGACTGATTCTCGCGGAAGCGAGAATCGGTCGAGCTGCGACACTCTTTCCCTA	24849
TDG_TG_f1CCG_f2CCGC_rep_9	15620	29311	29311	0	CGCAGCTCCCGTCCGCCTCGCGGAAGCGAGGCGGGCGGGAGCTGCGACACTCTTTCCCTA	16256
TDG_TG_f1GCC_f2AGAA_rep_5	17535	35140	35140	0	CGCAGCTCGCCTAGAACTCGCGGAAGCGAGTTCTGGGCGAGCTGCGACACTCTTTCCCTA	19347.4
TDG_TG_f1TCT_f2GTTC_rep_8	25385	44285	44285	0	CGCAGCTCTCTTGTTCCTCGCGGAAGCGAGGAACGAGAGAGCTGCGACACTCTTTCCCTA	24267.7
TDG_TG_f1ATA_f2CAGG_rep_5	14020	29172	29172	0	CGCAGCTCATATCAGGCTCGCGGAAGCGAGCCTGGTATGAGCTGCGACACTCTTTCCCTA	15802
TDG_TG_f1AAG_f2GATA_rep_4	30408	57481	60002	0	CGCAGCTCAAGTGATACTCGCGGAAGCGAGTATCGCTTGAGCTGCGACACTCTTTCCCTA	31924.8
TDG_TG_f1GGT_f2AGGC_rep_9	18812	32517	32517	0	CGCAGCTCGGTTAGGCCTCGCGGAAGCGAGGCCTGACCGAGCTGCGACACTCTTTCCCTA	17211.9
TDG_TG_f1GAA_f2CCAA_rep_4	14180	30871	30871	0	CGCAGCTCGAATCCAACTCGCGGAAGCGAGTTGGGTTCGAGCTGCGACACTCTTTCCCTA	16192.4
TDG_TG_f1GTC_f2GGCT_rep_8	26289	47384	47384	0	CGCAGCTCGTCTGGCTCTCGCGGAAGCGAGAGCCGGACGAGCTGCGACACTCTTTCCCTA	24911.4
TDG_TG_f1AGA_f2AACC_rep_7	17019	25072	25072	0	CGCAGCTCAGATAACCCTCGCGGAAGCGAGGGTTGTCTGAGCTGCGACACTCTTTCCCTA	13246.8
TDG_TG_f1CCG_f2CTAC_rep_4	15513	30583	30583	0	CGCAGCTCCCGTCTACCTCGCGGAAGCGAGGTAGGCGGGAGCTGCGACACTCTTTCCCTA	16250.2
dBr_7845	16841	31606	31606	0	CGCACCCGTGCTGTGTGCCGCGGAAGCGGCACACAGCACGGGTGCGACACTCTTTCCCTA	16880.6
TDG_TG_f1GAT_f2GCTT_rep_6	25091	38969	38969	0	CGCAGCTCGATTGCTTCTCGCGGAAGCGAGAAGCGATCGAGCTGCGACACTCTTTCCCTA	20665
TDG_TG_f1AAT_f2GTTA_rep_4	22087	51135	43786	0	CGCAGCTCAATTGTTACTCGCGGAAGCGAGTAACGATTGAGCTGCGACACTCTTTCCCTA	23353.5
TDG_TG_f1GCG_f2TGAC_rep_6	15926	34756	34756	0	CGCAGCTCGCGTTGACCTCGCGGAAGCGAGGTCAGCGCGAGCTGCGACACTCTTTCCCTA	18775.4
TDG_TG_f1CCG_f2TGGG_rep_1	15074	26697	26697	0	CGCAGCTCCCGTTGGGCTCGCGGAAGCGAGCCCAGCGGGAGCTGCGACACTCTTTCCCTA	14668.2
TDG_TG_f1CGA_f2GTCA_rep_5	22328	48664	48664	0	CGCAGCTCCGATGTCACTCGCGGAAGCGAGTGACGTCGGAGCTGCGACACTCTTTCCCTA	26750.2
TDG_TG_f1GCC_f2AAGA_rep_7	16331	30117	30117	0	CGCAGCTCGCCTAAGACTCGCGGAAGCGAGTCTTGGGCGAGCTGCGACACTCTTTCCCTA	16547.3
TDG_TG_f1ATT_f2TCCA_rep_4	15761	28126	28126	0	CGCAGCTCATTTTCCACTCGCGGAAGCGAGTGGAGAATGAGCTGCGACACTCTTTCCCTA	15506.8
TDG_TG_f1GCA_f2GGAC_rep_8	24639	50990	48759	0	CGCAGCTCGCATGGACCTCGCGGAAGCGAGGTCCGTGCGAGCTGCGACACTCTTTCCCTA	27382.4
TDG_TG_f1TAC_f2ACGC_rep_2	16543	31579	31579	0	CGCAGCTCTACTACGCCTCGCGGAAGCGAGGCGTGGTAGAGCTGCGACACTCTTTCCCTA	17930.5
TDG_TG_f1CCG_f2TTGT_rep_2	13558	27438	27438	0	CGCAGCTCCCGTTTGTCTCGCGGAAGCGAGACAAGCGGGAGCTGCGACACTCTTTCCCTA	15626.7
TDG_TG_f1TCA_f2CGTC_rep_5	14089	29868	29868	0	CGCAGCTCTCATCGTCCTCGCGGAAGCGAGGACGGTGAGAGCTGCGACACTCTTTCCCTA	17102.6
TDG_TG_f1CAT_f2TATC_rep_1	14594	29495	29495	0	CGCAGCTCCATTTATCCTCGCGGAAGCGAGGATAGATGGAGCTGCGACACTCTTTCCCTA	16934.4
TDG_TG_f1GTT_f2CAGT_rep_7	15021	31194	31194	0	CGCAGCTCGTTTCAGTCTCGCGGAAGCGAGACTGGAACGAGCTGCGACACTCTTTCCCTA	17980.7
TDG_TG_f1ACC_f2CGCA_rep_3	18580	34558	34558	0	CGCAGCTCACCTCGCACTCGCGGAAGCGAGTGCGGGGTGAGCTGCGACACTCTTTCCCTA	20198.1
TDG_TG_f1GAG_f2CCTC_rep_9	13688	23667	23667	0	CGCAGCTCGAGTCCTCCTCGCGGAAGCGAGGAGGGCTCGAGCTGCGACACTCTTTCCCTA	13887.1
TDG_TG_f1CCG_f2GCCA_rep_4	28082	50718	55469	0	CGCAGCTCCCGTGCCACTCGCGGAAGCGAGTGGCGCGGGAGCTGCGACACTCTTTCCCTA	32551
TDG_TG_f1CGG_f2GTCG_rep_8	31219	50331	61582	0	CGCAGCTCCGGTGTCGCTCGCGGAAGCGAGCGACGCCGGAGCTGCGACACTCTTTCCCTA	36311.3
dBr_1701	14307	29933	29933	0	CGCGACCTAGGCTAGGTCCGCGGAAGCGGACCTAGCCTAGGTCGCGACACTCTTTCCCTA	17812.2
TDG_TG_f1CTC_f2AAGT_rep_4	13065	25264	25264	0	CGCAGCTCCTCTAAGTCTCGCGGAAGCGAGACTTGGAGGAGCTGCGACACTCTTTCCCTA	15338.9
TDG_TG_f1CCG_f2GGCA_rep_6	25185	47905	47905	0	CGCAGCTCCCGTGGCACTCGCGGAAGCGAGTGCCGCGGGAGCTGCGACACTCTTTCCCTA	29184.8
TDG_TG_f1GGG_f2GTTG_rep_4	27747	57012	54816	0	CGCAGCTCGGGTGTTGCTCGCGGAAGCGAGCAACGCCCGAGCTGCGACACTCTTTCCCTA	33281.2
TDG_TG_f1TTC_f2CCTG_rep_1	12493	22680	22680	0	CGCAGCTCTTCTCCTGCTCGCGGAAGCGAGCAGGGGAAGAGCTGCGACACTCTTTCCCTA	13781.6
TDG_TG_f1ATG_f2TTTC_rep_2	11540	24444	24444	0	CGCAGCTCATGTTTTCCTCGCGGAAGCGAGGAAAGCATGAGCTGCGACACTCTTTCCCTA	15044.4
TDG_TG_f1CCT_f2CTAC_rep_3	12455	20387	20387	0	CGCAGCTCCCTTCTACCTCGCGGAAGCGAGGTAGGAGGGAGCTGCGACACTCTTTCCCTA	12649.4
TDG_TG_f1GCT_f2AAAA_rep_9	14508	25306	25306	0	CGCAGCTCGCTTAAAACTCGCGGAAGCGAGTTTTGAGCGAGCTGCGACACTCTTTCCCTA	15712.4
TDG_TG_f1AAT_f2TGCA_rep_10	13116	26981	26981	0	CGCAGCTCAATTTGCACTCGCGGAAGCGAGTGCAGATTGAGCTGCGACACTCTTTCCCTA	16953
TDG_TG_f1GCT_f2ATCT_rep_8	16467	32195	32195	0	CGCAGCTCGCTTATCTCTCGCGGAAGCGAGAGATGAGCGAGCTGCGACACTCTTTCCCTA	20506.6
TDG_TG_f1GCC_f2GGCT_rep_3	20704	36738	36738	0	CGCAGCTCGCCTGGCTCTCGCGGAAGCGAGAGCCGGGCGAGCTGCGACACTCTTTCCCTA	23502.4
TDG_TG_f1ACT_f2ACAT_rep_9	15913	35535	35535	0	CGCAGCTCACTTACATCTCGCGGAAGCGAGATGTGAGTGAGCTGCGACACTCTTTCCCTA	22734.5
TDG_random_loop_GCCG_rep_7	16228	32446	32446	0	CGCAGCTCGGCTATTACTCGCGCCGGCGAGTAATAGCCGAGCTGCGACACTCTTTCCCTA	20627.4
TDG_TG_f1TGC_f2AACC_rep_3	15640	26685	26685	0	CGCAGCTCTGCTAACCCTCGCGGAAGCGAGGGTTGGCAGAGCTGCGACACTCTTTCCCTA	16814.3
TDG_TG_f1TTC_f2AATT_rep_4	12791	27590	27590	0	CGCAGCTCTTCTAATTCTCGCGGAAGCGAGAATTGGAAGAGCTGCGACACTCTTTCCCTA	17322.2
TDG_TG_f1AAA_f2CAAT_rep_10	11769	19923	19923	0	CGCAGCTCAAATCAATCTCGCGGAAGCGAGATTGGTTTGAGCTGCGACACTCTTTCCCTA	12273.7
TDG_TG_f1CCT_f2AATA_rep_9	15775	28960	28960	0	CGCAGCTCCCTTAATACTCGCGGAAGCGAGTATTGAGGGAGCTGCGACACTCTTTCCCTA	17691.6
TDG_TG_f1CTG_f2ATAG_rep_2	14274	30491	30491	0	CGCAGCTCCTGTATAGCTCGCGGAAGCGAGCTATGCAGGAGCTGCGACACTCTTTCCCTA	18700.1
TDG_TG_f1GAA_f2AGGA_rep_3	17377	30208	30208	0	CGCAGCTCGAATAGGACTCGCGGAAGCGAGTCCTGTTCGAGCTGCGACACTCTTTCCCTA	18515.2
TDG_TG_f1GGT_f2TAGC_rep_9	14222	26786	26786	0	CGCAGCTCGGTTTAGCCTCGCGGAAGCGAGGCTAGACCGAGCTGCGACACTCTTTCCCTA	16352.9
TDG_TG_f1GCT_f2AAGT_rep_7	15582	29671	29671	0	CGCAGCTCGCTTAAGTCTCGCGGAAGCGAGACTTGAGCGAGCTGCGACACTCTTTCCCTA	18114.2
TDG_TG_f1TGT_f2GTGA_rep_6	22804	41059	41059	0	CGCAGCTCTGTTGTGACTCGCGGAAGCGAGTCACGACAGAGCTGCGACACTCTTTCCCTA	24999.3
TDG_TG_f1AAA_f2GTCC_rep_8	23551	47227	47227	0	CGCAGCTCAAATGTCCCTCGCGGAAGCGAGGGACGTTTGAGCTGCGACACTCTTTCCCTA	28680.8
TDG_TG_f1AAG_f2GGAC_rep_2	31295	63088	61730	0	CGCAGCTCAAGTGGACCTCGCGGAAGCGAGGTCCGCTTGAGCTGCGACACTCTTTCCCTA	36920.5
TDG_TG_f1AGG_f2CAGG_rep_2	13572	24374	24374	0	CGCAGCTCAGGTCAGGCTCGCGGAAGCGAGCCTGGCCTGAGCTGCGACACTCTTTCCCTA	14279.3
TDG_TG_f1AGT_f2TGCA_rep_2	17025	33105	33105	0	CGCAGCTCAGTTTGCACTCGCGGAAGCGAGTGCAGACTGAGCTGCGACACTCTTTCCCTA	19394.3
TDG_TG_f1GTC_f2GTCG_rep_4	24260	53182	48021	0	CGCAGCTCGTCTGTCGCTCGCGGAAGCGAGCGACGGACGAGCTGCGACACTCTTTCCCTA	28121
TDG_TG_f1TCC_f2CAAT_rep_6	14166	26368	26368	0	CGCAGCTCTCCTCAATCTCGCGGAAGCGAGATTGGGGAGAGCTGCGACACTCTTTCCCTA	15347.5
TDG_TG_f1TAT_f2TACG_rep_9	16461	29099	29099	0	CGCAGCTCTATTTACGCTCGCGGAAGCGAGCGTAGATAGAGCTGCGACACTCTTTCCCTA	17018.6
TDG_TG_f1CCC_f2CGCA_rep_4	17365	36971	36971	0	CGCAGCTCCCCTCGCACTCGCGGAAGCGAGTGCGGGGGGAGCTGCGACACTCTTTCCCTA	21650.2
TDG_TG_f1ACC_f2GGAC_rep_10	34616	62253	68202	0	CGCAGCTCACCTGGACCTCGCGGAAGCGAGGTCCGGGTGAGCTGCGACACTCTTTCCCTA	40394.1
TDG_TG_f1GAA_f2TTCC_rep_7	15206	27460	27460	0	CGCAGCTCGAATTTCCCTCGCGGAAGCGAGGGAAGTTCGAGCTGCGACACTCTTTCCCTA	16154
TDG_TG_f1TGT_f2CGGC_rep_3	15751	33656	33656	0	CGCAGCTCTGTTCGGCCTCGCGGAAGCGAGGCCGGACAGAGCTGCGACACTCTTTCCCTA	19589.4
TDG_TG_f1ATC_f2ACAC_rep_8	18038	32103	32103	0	CGCAGCTCATCTACACCTCGCGGAAGCGAGGTGTGGATGAGCTGCGACACTCTTTCCCTA	18685.2
TDG_TG_f1GCC_f2ACCG_rep_5	19700	33639	33639	0	CGCAGCTCGCCTACCGCTCGCGGAAGCGAGCGGTGGGCGAGCTGCGACACTCTTTCCCTA	19707.1
TDG_TG_f1AAT_f2GTTT_rep_3	22099	45738	45738	0	CGCAGCTCAATTGTTTCTCGCGGAAGCGAGAAACGATTGAGCTGCGACACTCTTTCCCTA	26566.3
TDG_TG_f1AGA_f2TCCG_rep_7	16985	27185	27185	0	CGCAGCTCAGATTCCGCTCGCGGAAGCGAGCGGAGTCTGAGCTGCGACACTCTTTCCCTA	15695.1
TDG_TG_f1ATA_f2CGAT_rep_6	14966	22727	22727	0	CGCAGCTCATATCGATCTCGCGGAAGCGAGATCGGTATGAGCTGCGACACTCTTTCCCTA	13076.9
dBr_1341	16896	30649	30649	0	CGCGCTACTCCGCTATGGCGCGGAAGCGCCATAGCGGAGTAGCGCGACACTCTTTCCCTA	17579.8
TDG_TG_f1CGA_f2GTAG_rep_1	22956	38971	38971	0	CGCAGCTCCGATGTAGCTCGCGGAAGCGAGCTACGTCGGAGCTGCGACACTCTTTCCCTA	22286.2
dBr_4413	12482	21226	21226	0	CGCTTCATGGGGGGGCTGCGCGGAAGCGCAGCCCCCCCATGAAGCGACACTCTTTCCCTA	11967.7
TDG_TG_f1CCT_f2TGAC_rep_5	15070	30211	30211	0	CGCAGCTCCCTTTGACCTCGCGGAAGCGAGGTCAGAGGGAGCTGCGACACTCTTTCCCTA	16757.7
TDG_TG_f1GGC_f2TTGA_rep_7	15883	27267	27267	0	CGCAGCTCGGCTTTGACTCGCGGAAGCGAGTCAAGGCCGAGCTGCGACACTCTTTCCCTA	15053.2
dBr_4983	14599	22506	22506	0	CGCCGTGGCCCCAGAATACGCGGAAGCGTATTCTGGGGCCACGGCGACACTCTTTCCCTA	12258.2
TDG_TG_f1CTT_f2GGAA_rep_6	22127	43575	43575	0	CGCAGCTCCTTTGGAACTCGCGGAAGCGAGTTCCGAAGGAGCTGCGACACTCTTTCCCTA	22994.9
TDG_TG_f1CGG_f2TGAA_rep_5	14128	26797	26797	0	CGCAGCTCCGGTTGAACTCGCGGAAGCGAGTTCAGCCGGAGCTGCGACACTCTTTCCCTA	13943.6
TDG_TG_f1CAA_f2TTAC_rep_7	14647	25235	25235	0	CGCAGCTCCAATTTACCTCGCGGAAGCGAGGTAAGTTGGAGCTGCGACACTCTTTCCCTA	13130.9
TDG_TG_f1ATT_f2CGGG_rep_1	15762	36538	36538	0	CGCAGCTCATTTCGGGCTCGCGGAAGCGAGCCCGGAATGAGCTGCGACACTCTTTCCCTA	19026.3
TDG_TG_f1TCT_f2GCAC_rep_5	28136	53111	55574	0	CGCAGCTCTCTTGCACCTCGCGGAAGCGAGGTGCGAGAGAGCTGCGACACTCTTTCCCTA	28962.8
dBr_6357	15532	28756	28756	0	CGCTGCGGGCTGCCGGCTCGCGGAAGCGAGCCGGCAGCCCGCAGCGACACTCTTTCCCTA	14985
TDG_TG_f1TAC_f2GACA_rep_4	27140	52874	53633	0	CGCAGCTCTACTGACACTCGCGGAAGCGAGTGTCGGTAGAGCTGCGACACTCTTTCCCTA	28049.7
TDG_TG_f1CTG_f2AGGA_rep_7	20164	36792	36792	0	CGCAGCTCCTGTAGGACTCGCGGAAGCGAGTCCTGCAGGAGCTGCGACACTCTTTCCCTA	19218
dBr_7968	16521	36385	36385	0	CGCTTAATCGTATTTAGACGCGGAAGCGTCTAAATACGATTAAGCGACACTCTTTCCCTA	18979.2
TDG_TG_f1CTT_f2TCTT_rep_9	15169	27224	27224	0	CGCAGCTCCTTTTCTTCTCGCGGAAGCGAGAAGAGAAGGAGCTGCGACACTCTTTCCCTA	14255.7
TDG_TG_f1AGT_f2GCAG_rep_5	30167	50674	59532	0	CGCAGCTCAGTTGCAGCTCGCGGAAGCGAGCTGCGACTGAGCTGCGACACTCTTTCCCTA	31505.6
TDG_TG_f1CTG_f2GCTC_rep_2	32752	61071	64570	0	CGCAGCTCCTGTGCTCCTCGCGGAAGCGAGGAGCGCAGGAGCTGCGACACTCTTTCCCTA	34098
TDG_TG_f1GGT_f2AGGC_rep_6	16276	38199	38199	0	CGCAGCTCGGTTAGGCCTCGCGGAAGCGAGGCCTGACCGAGCTGCGACACTCTTTCCCTA	20534.8
TDG_TG_f1CGC_f2TCTT_rep_1	16073	29848	29848	0	CGCAGCTCCGCTTCTTCTCGCGGAAGCGAGAAGAGGCGGAGCTGCGACACTCTTTCCCTA	16242.5
TDG_TG_f1CAC_f2ATTT_rep_4	16718	34396	34396	0	CGCAGCTCCACTATTTCTCGCGGAAGCGAGAAATGGTGGAGCTGCGACACTCTTTCCCTA	18991.3
TDG_TG_f1CGA_f2GCGT_rep_2	24027	47409	47409	0	CGCAGCTCCGATGCGTCTCGCGGAAGCGAGACGCGTCGGAGCTGCGACACTCTTTCCCTA	26254.7
TDG_TG_f1CAA_f2GTCG_rep_6	26387	51219	52166	0	CGCAGCTCCAATGTCGCTCGCGGAAGCGAGCGACGTTGGAGCTGCGACACTCTTTCCCTA	29007.3
TDG_TG_f1GGT_f2ACTC_rep_6	19336	36767	36767	0	CGCAGCTCGGTTACTCCTCGCGGAAGCGAGGAGTGACCGAGCTGCGACACTCTTTCCCTA	20753.5
TDG_TG_f1GTT_f2AAGA_rep_4	16024	33460	33460	0	CGCAGCTCGTTTAAGACTCGCGGAAGCGAGTCTTGAACGAGCTGCGACACTCTTTCCCTA	19032.8
TDG_TG_f1ACG_f2CCTA_rep_10	14308	27564	27564	0	CGCAGCTCACGTCCTACTCGCGGAAGCGAGTAGGGCGTGAGCTGCGACACTCTTTCCCTA	15633.5
TDG_TG_f1TTA_f2AGTA_rep_9	16015	33699	33699	0	CGCAGCTCTTATAGTACTCGCGGAAGCGAGTACTGTAAGAGCTGCGACACTCTTTCCCTA	19177.1
TDG_TG_f1AAA_f2CCCA_rep_1	14197	26895	26895	0	CGCAGCTCAAATCCCACTCGCGGAAGCGAGTGGGGTTTGAGCTGCGACACTCTTTCCCTA	15407.8
TDG_TG_f1GTC_f2ATGA_rep_2	16762	30543	30543	0	CGCAGCTCGTCTATGACTCGCGGAAGCGAGTCATGGACGAGCTGCGACACTCTTTCCCTA	17568.2
TDG_TG_f1TGG_f2CCGA_rep_4	14872	30147	30147	0	CGCAGCTCTGGTCCGACTCGCGGAAGCGAGTCGGGCCAGAGCTGCGACACTCTTTCCCTA	17359.2
TDG_TG_f1TCA_f2ACAT_rep_10	15815	29094	29094	0	CGCAGCTCTCATACATCTCGCGGAAGCGAGATGTGTGAGAGCTGCGACACTCTTTCCCTA	16681.4
TDG_TG_f1TCA_f2CTTG_rep_1	14837	25338	25338	0	CGCAGCTCTCATCTTGCTCGCGGAAGCGAGCAAGGTGAGAGCTGCGACACTCTTTCCCTA	14527.8
TDG_TG_f1GAA_f2TTGC_rep_7	14308	28594	28594	0	CGCAGCTCGAATTTGCCTCGCGGAAGCGAGGCAAGTTCGAGCTGCGACACTCTTTCCCTA	16464.9
TDG_TG_f1AAT_f2AGGA_rep_5	17713	37072	37072	0	CGCAGCTCAATTAGGACTCGCGGAAGCGAGTCCTGATTGAGCTGCGACACTCTTTCCCTA	21346.7
TDG_TG_f1ACA_f2CATA_rep_10	14594	26730	26730	0	CGCAGCTCACATCATACTCGCGGAAGCGAGTATGGTGTGAGCTGCGACACTCTTTCCCTA	15491.3
dBr_3257	15464	32418	32418	0	CGCGATTCAAGCTGTTCCCGCGGAAGCGGGAACAGCTTGAATCGCGACACTCTTTCCCTA	18787.8
TDG_TG_f1AAT_f2AGCT_rep_3	22257	44401	44401	0	CGCAGCTCAATTAGCTCTCGCGGAAGCGAGAGCTGATTGAGCTGCGACACTCTTTCCCTA	25872.8
dBr_5207	19098	39809	39809	0	CGCAAGCCGCACGTTGCTCGCGGAAGCGAGCAACGTGCGGCTTGCGACACTCTTTCCCTA	22872.4
TDG_TG_f1ACG_f2TGGG_rep_10	15657	29169	29169	0	CGCAGCTCACGTTGGGCTCGCGGAAGCGAGCCCAGCGTGAGCTGCGACACTCTTTCCCTA	16512.4
TDG_TG_f1CAC_f2TTCC_rep_6	18798	36325	36325	0	CGCAGCTCCACTTTCCCTCGCGGAAGCGAGGGAAGGTGGAGCTGCGACACTCTTTCCCTA	20339.8
TDG_TG_f1TGA_f2TGAA_rep_9	13413	25535	25535	0	CGCAGCTCTGATTGAACTCGCGGAAGCGAGTTCAGTCAGAGCTGCGACACTCTTTCCCTA	14431.7
TDG_TG_f1CAG_f2CCGG_rep_9	16634	28101	28101	0	CGCAGCTCCAGTCCGGCTCGCGGAAGCGAGCCGGGCTGGAGCTGCGACACTCTTTCCCTA	15881.9
TDG_TG_f1GTA_f2GTAT_rep_2	25331	49847	49847	0	CGCAGCTCGTATGTATCTCGCGGAAGCGAGATACGTACGAGCTGCGACACTCTTTCCCTA	28001.3
TDG_TG_f1ACT_f2GAAG_rep_2	26423	52284	52236	0	CGCAGCTCACTTGAAGCTCGCGGAAGCGAGCTTCGAGTGAGCTGCGACACTCTTTCCCTA	29343.3
TDG_TG_f1TTA_f2CACC_rep_3	14174	26395	26395	0	CGCAGCTCTTATCACCCTCGCGGAAGCGAGGGTGGTAAGAGCTGCGACACTCTTTCCCTA	14827.3
TDG_TG_f1CAC_f2CCGC_rep_6	15962	32514	32514	0	CGCAGCTCCACTCCGCCTCGCGGAAGCGAGGCGGGGTGGAGCTGCGACACTCTTTCCCTA	18323.6
TDG_TG_f1GAA_f2AGTA_rep_3	15451	32650	32650	0	CGCAGCTCGAATAGTACTCGCGGAAGCGAGTACTGTTCGAGCTGCGACACTCTTTCCCTA	18563.4
TDG_TG_f1AGA_f2TTAG_rep_6	11776	24141	24141	0	CGCAGCTCAGATTTAGCTCGCGGAAGCGAGCTAAGTCTGAGCTGCGACACTCTTTCCCTA	13719.6
TDG_TG_f1CCT_f2GCCG_rep_8	25331	46286	46286	0	CGCAGCTCCCTTGCCGCTCGCGGAAGCGAGCGGCGAGGGAGCTGCGACACTCTTTCCCTA	26212.7
dBr_2708	15344	28558	28558	0	CGCGTAAGCCGCTCTGAACGCGGAAGCGTTCAGAGCGGCTTACGCGACACTCTTTCCCTA	16156.6
TDG_TG_f1GTA_f2GGAA_rep_10	24279	44057	44057	0	CGCAGCTCGTATGGAACTCGCGGAAGCGAGTTCCGTACGAGCTGCGACACTCTTTCCCTA	24620.2
TDG_TG_f1TAT_f2ACTG_rep_6	16374	30882	30882	0	CGCAGCTCTATTACTGCTCGCGGAAGCGAGCAGTGATAGAGCTGCGACACTCTTTCCCTA	17221.2
TDG_TG_f1AAA_f2CACC_rep_10	12690	21437	21437	0	CGCAGCTCAAATCACCCTCGCGGAAGCGAGGGTGGTTTGAGCTGCGACACTCTTTCCCTA	12290.9
dBr_6955	11513	24673	24673	0	CGCTCCGCCGGGAGTATTCGCGGAAGCGAATACTCCCGGCGGAGCGACACTCTTTCCCTA	14613.6
TDG_TG_random_6TG_1_rep_7	15754	30013	30013	0	CGCATATTCATGGTTACTCGCGGAAGCGGGTGGCCGTGAGTGTGCGACACTCTTTCCCTA	17788.2
TDG_TG_f1CGG_f2ACTG_rep_2	16334	31908	31908	0	CGCAGCTCCGGTACTGCTCGCGGAAGCGAGCAGTGCCGGAGCTGCGACACTCTTTCCCTA	18943.7
TDG_TG_f1AGA_f2CATG_rep_6	11244	23316	23316	0	CGCAGCTCAGATCATGCTCGCGGAAGCGAGCATGGTCTGAGCTGCGACACTCTTTCCCTA	14050
TDG_TG_f1TTC_f2AACT_rep_5	12486	23787	23787	0	CGCAGCTCTTCTAACTCTCGCGGAAGCGAGAGTTGGAAGAGCTGCGACACTCTTTCCCTA	14775.2
TDG_TG_f1AAT_f2ATGC_rep_9	14414	29812	29812	0	CGCAGCTCAATTATGCCTCGCGGAAGCGAGGCATGATTGAGCTGCGACACTCTTTCCCTA	18775.6
TDG_TG_f1AGC_f2CGAT_rep_2	11034	21445	21445	0	CGCAGCTCAGCTCGATCTCGCGGAAGCGAGATCGGGCTGAGCTGCGACACTCTTTCCCTA	13919.1
TDG_TG_f1TTC_f2AATA_rep_2	11141	20791	20791	0	CGCAGCTCTTCTAATACTCGCGGAAGCGAGTATTGGAAGAGCTGCGACACTCTTTCCCTA	13913.1
TDG_TG_f1GTT_f2TGCG_rep_4	11516	21658	21658	0	CGCAGCTCGTTTTGCGCTCGCGGAAGCGAGCGCAGAACGAGCTGCGACACTCTTTCCCTA	14566.4
TDG_TG_f1CGG_f2GTTT_rep_5	19954	42052	42052	0	CGCAGCTCCGGTGTTTCTCGCGGAAGCGAGAAACGCCGGAGCTGCGACACTCTTTCCCTA	28764.6
TDG_TG_f1ATA_f2CCAC_rep_6	7876	19108	19108	0	CGCAGCTCATATCCACCTCGCGGAAGCGAGGTGGGTATGAGCTGCGACACTCTTTCCCTA	13428.1
TDG_TG_f1CGA_f2GCTG_rep_8	18325	29291	29291	0	CGCAGCTCCGATGCTGCTCGCGGAAGCGAGCAGCGTCGGAGCTGCGACACTCTTTCCCTA	21087.7
TDG_TG_f1ATA_f2TCGA_rep_9	9373	17305	17305	0	CGCAGCTCATATTCGACTCGCGGAAGCGAGTCGAGTATGAGCTGCGACACTCTTTCCCTA	12685
TDG_TG_f1TGG_f2TAAT_rep_9	7966	16518	16518	0	CGCAGCTCTGGTTAATCTCGCGGAAGCGAGATTAGCCAGAGCTGCGACACTCTTTCCCTA	12189
dBr_1319	12299	21990	21990	0	CGCTTGTCAGCGGTACTGCGCGGAAGCGCAGTACCGCTGACAAGCGACACTCTTTCCCTA	16392.1
TDG_TG_f1CGT_f2CCGA_rep_5	9672	20808	20808	0	CGCAGCTCCGTTCCGACTCGCGGAAGCGAGTCGGGACGGAGCTGCGACACTCTTTCCCTA	15823.6
TDG_TG_f1GGG_f2TGGC_rep_3	7767	17017	17017	0	CGCAGCTCGGGTTGGCCTCGCGGAAGCGAGGCCAGCCCGAGCTGCGACACTCTTTCCCTA	13046.4
TDG_TG_f1GCG_f2AGAT_rep_5	12361	23643	23643	0	CGCAGCTCGCGTAGATCTCGCGGAAGCGAGATCTGCGCGAGCTGCGACACTCTTTCCCTA	18318.8
TDG_TG_f1GTC_f2GAAC_rep_1	16291	30756	30756	0	CGCAGCTCGTCTGAACCTCGCGGAAGCGAGGTTCGGACGAGCTGCGACACTCTTTCCCTA	24308.8
TDG_TG_f1GCA_f2AGCT_rep_5	12709	24294	24294	0	CGCAGCTCGCATAGCTCTCGCGGAAGCGAGAGCTGTGCGAGCTGCGACACTCTTTCCCTA	19593.1
TDG_TG_f1ATT_f2TTAG_rep_3	7795	15871	15871	0	CGCAGCTCATTTTTAGCTCGCGGAAGCGAGCTAAGAATGAGCTGCGACACTCTTTCCCTA	13111
TDG_TG_f1GAC_f2TCAA_rep_10	8405	17641	17641	0	CGCAGCTCGACTTCAACTCGCGGAAGCGAGTTGAGGTCGAGCTGCGACACTCTTTCCCTA	15121.1
TDG_TG_f1CTA_f2CAAG_rep_10	7601	13941	13941	0	CGCAGCTCCTATCAAGCTCGCGGAAGCGAGCTTGGTAGGAGCTGCGACACTCTTTCCCTA	12074.5
TDG_TG_f1GGT_f2ATCC_rep_9	11079	24257	24257	0	CGCAGCTCGGTTATCCCTCGCGGAAGCGAGGGATGACCGAGCTGCGACACTCTTTCCCTA	21224.5
TDG_TG_f1GCA_f2CAAT_rep_8	8036	18194	18194	0	CGCAGCTCGCATCAATCTCGCGGAAGCGAGATTGGTGCGAGCTGCGACACTCTTTCCCTA	15971.7
TDG_TG_f1CAG_f2CGCG_rep_10	13598	28084	28084	0	CGCAGCTCCAGTCGCGCTCGCGGAAGCGAGCGCGGCTGGAGCTGCGACACTCTTTCCCTA	25002.3
TDG_TG_f1TAT_f2GTCT_rep_1	17096	33007	33007	0	CGCAGCTCTATTGTCTCTCGCGGAAGCGAGAGACGATAGAGCTGCGACACTCTTTCCCTA	29575.6
TDG_TG_f1TCA_f2AACC_rep_6	8393	17904	17904	0	CGCAGCTCTCATAACCCTCGCGGAAGCGAGGGTTGTGAGAGCTGCGACACTCTTTCCCTA	16217.1
TDG_TG_f1TTC_f2AGAG_rep_2	7451	15205	15205	0	CGCAGCTCTTCTAGAGCTCGCGGAAGCGAGCTCTGGAAGAGCTGCGACACTCTTTCCCTA	14147.1
TDG_TG_f1GAC_f2CTCG_rep_7	7710	17466	17466	0	CGCAGCTCGACTCTCGCTCGCGGAAGCGAGCGAGGGTCGAGCTGCGACACTCTTTCCCTA	16316.9
TDG_TG_f1TGT_f2AAAG_rep_7	8824	16381	16381	0	CGCAGCTCTGTTAAAGCTCGCGGAAGCGAGCTTTGACAGAGCTGCGACACTCTTTCCCTA	15358.1
TDG_TG_f1CTG_f2AGAT_rep_9	11778	21749	21749	0	CGCAGCTCCTGTAGATCTCGCGGAAGCGAGATCTGCAGGAGCTGCGACACTCTTTCCCTA	20500.1
TDG_TG_f1ACG_f2ATGC_rep_3	9141	19666	19666	0	CGCAGCTCACGTATGCCTCGCGGAAGCGAGGCATGCGTGAGCTGCGACACTCTTTCCCTA	19067
TDG_TG_f1GCG_f2ACCC_rep_8	9464	19029	19029	0	CGCAGCTCGCGTACCCCTCGCGGAAGCGAGGGGTGCGCGAGCTGCGACACTCTTTCCCTA	18518
TDG_TG_f1AGG_f2TGCC_rep_5	7471	16566	16566	0	CGCAGCTCAGGTTGCCCTCGCGGAAGCGAGGGCAGCCTGAGCTGCGACACTCTTTCCCTA	16111.5
TDG_TG_f1GAG_f2TTAT_rep_9	6994	16180	16180	0	CGCAGCTCGAGTTTATCTCGCGGAAGCGAGATAAGCTCGAGCTGCGACACTCTTTCCCTA	15655.9
TDG_TG_f1GAG_f2TCCT_rep_2	6935	14401	14401	0	CGCAGCTCGAGTTCCTCTCGCGGAAGCGAGAGGAGCTCGAGCTGCGACACTCTTTCCCTA	13605
TDG_TG_f1AGA_f2CACA_rep_5	7212	12608	12608	0	CGCAGCTCAGATCACACTCGCGGAAGCGAGTGTGGTCTGAGCTGCGACACTCTTTCCCTA	11906.8
TDG_TG_f1CCA_f2CTGT_rep_9	7332	14626	14626	0	CGCAGCTCCCATCTGTCTCGCGGAAGCGAGACAGGTGGGAGCTGCGACACTCTTTCCCTA	13822.5
TDG_TG_f1GGC_f2CTGG_rep_8	6712	16620	16620	0	CGCAGCTCGGCTCTGGCTCGCGGAAGCGAGCCAGGGCCGAGCTGCGACACTCTTTCCCTA	15840.9
TDG_TG_f1ATG_f2CGCT_rep_9	11759	24639	24639	0	CGCAGCTCATGTCGCTCTCGCGGAAGCGAGAGCGGCATGAGCTGCGACACTCTTTCCCTA	22965
TDG_TG_f1TTG_f2AACG_rep_3	10738	20541	20541	0	CGCAGCTCTTGTAACGCTCGCGGAAGCGAGCGTTGCAAGAGCTGCGACACTCTTTCCCTA	19140.1
TDG_TG_f1TTT_f2CCTA_rep_7	7105	15169	15169	0	CGCAGCTCTTTTCCTACTCGCGGAAGCGAGTAGGGAAAGAGCTGCGACACTCTTTCCCTA	14127.1
TDG_TG_f1CTT_f2GTTG_rep_2	14475	23993	23993	0	CGCAGCTCCTTTGTTGCTCGCGGAAGCGAGCAACGAAGGAGCTGCGACACTCTTTCCCTA	22149.7
TDG_TG_f1TCT_f2CCCT_rep_9	7607	15403	15403	0	CGCAGCTCTCTTCCCTCTCGCGGAAGCGAGAGGGGAGAGAGCTGCGACACTCTTTCCCTA	13989
TDG_TG_f1ACA_f2GTGC_rep_5	14163	32780	32780	0	CGCAGCTCACATGTGCCTCGCGGAAGCGAGGCACGTGTGAGCTGCGACACTCTTTCCCTA	29419.5
TDG_TG_f1ACC_f2CCGC_rep_1	10076	19832	19832	0	CGCAGCTCACCTCCGCCTCGCGGAAGCGAGGCGGGGGTGAGCTGCGACACTCTTTCCCTA	17646.6
dBr_0995	11724	24634	24634	0	CGCCAGCTGCGAATGCGCCGCGGAAGCGGCGCATTCGCAGCTGGCGACACTCTTTCCCTA	21983.8
TDG_TG_f1TAC_f2GTAC_rep_10	14528	33056	33056	0	CGCAGCTCTACTGTACCTCGCGGAAGCGAGGTACGGTAGAGCTGCGACACTCTTTCCCTA	29370.2
TDG_TG_f1TGT_f2TTAA_rep_7	7979	15698	15698	0	CGCAGCTCTGTTTTAACTCGCGGAAGCGAGTTAAGACAGAGCTGCGACACTCTTTCCCTA	13818
TDG_TG_f1TAT_f2ACTC_rep_3	10563	22634	22634	0	CGCAGCTCTATTACTCCTCGCGGAAGCGAGGAGTGATAGAGCTGCGACACTCTTTCCCTA	19722.7
TDG_TG_f1GAG_f2CACG_rep_9	10660	22549	22549	0	CGCAGCTCGAGTCACGCTCGCGGAAGCGAGCGTGGCTCGAGCTGCGACACTCTTTCCCTA	19359.8
dBr_3834	11699	20580	20580	0	CGCGAGTTAAGCACCAGACGCGGAAGCGTCTGGTGCTTAACTCGCGACACTCTTTCCCTA	17513.1
TDG_TG_f1ATA_f2TATA_rep_5	7217	17283	17283	0	CGCAGCTCATATTATACTCGCGGAAGCGAGTATAGTATGAGCTGCGACACTCTTTCCCTA	14361.6
TDG_TG_f1CAA_f2CTAC_rep_3	7896	15566	15566	0	CGCAGCTCCAATCTACCTCGCGGAAGCGAGGTAGGTTGGAGCTGCGACACTCTTTCCCTA	12829.8
TDG_TG_f1AAT_f2TATG_rep_10	9673	16383	16383	0	CGCAGCTCAATTTATGCTCGCGGAAGCGAGCATAGATTGAGCTGCGACACTCTTTCCCTA	13245.6
TDG_TG_f1CAA_f2TCAA_rep_7	8548	18527	18527	0	CGCAGCTCCAATTCAACTCGCGGAAGCGAGTTGAGTTGGAGCTGCGACACTCTTTCCCTA	14870.1
TDG_TG_f1AGG_f2GTAG_rep_4	23618	48017	48017	0	CGCAGCTCAGGTGTAGCTCGCGGAAGCGAGCTACGCCTGAGCTGCGACACTCTTTCCCTA	38110.9
TDG_TG_f1ATG_f2CCCG_rep_9	11459	19843	19843	0	CGCAGCTCATGTCCCGCTCGCGGAAGCGAGCGGGGCATGAGCTGCGACACTCTTTCCCTA	15341.7
TDG_TG_f1GCA_f2ATCT_rep_2	11671	25767	25767	0	CGCAGCTCGCATATCTCTCGCGGAAGCGAGAGATGTGCGAGCTGCGACACTCTTTCCCTA	19897.4
TDG_TG_f1TAA_f2AGAA_rep_9	10058	21525	21525	0	CGCAGCTCTAATAGAACTCGCGGAAGCGAGTTCTGTTAGAGCTGCGACACTCTTTCCCTA	16075.8
dBr_8117	9653	17368	17368	0	CGCGAACATTAATCTAGACGCGGAAGCGTCTAGATTAATGTTCGCGACACTCTTTCCCTA	12867.7
TDG_TG_f1CGG_f2ATTA_rep_7	12347	27992	27992	0	CGCAGCTCCGGTATTACTCGCGGAAGCGAGTAATGCCGGAGCTGCGACACTCTTTCCCTA	20639
TDG_TG_f1GAT_f2GACA_rep_4	21655	36743	36743	0	CGCAGCTCGATTGACACTCGCGGAAGCGAGTGTCGATCGAGCTGCGACACTCTTTCCCTA	27007.5
TDG_TG_f1CCT_f2GACA_rep_9	20656	31546	31546	0	CGCAGCTCCCTTGACACTCGCGGAAGCGAGTGTCGAGGGAGCTGCGACACTCTTTCCCTA	22923.8
TDG_TG_f1AGC_f2ACGT_rep_5	12180	25581	25581	0	CGCAGCTCAGCTACGTCTCGCGGAAGCGAGACGTGGCTGAGCTGCGACACTCTTTCCCTA	18373.9
TDG_TG_f1TTC_f2ATCA_rep_5	14254	27825	27825	0	CGCAGCTCTTCTATCACTCGCGGAAGCGAGTGATGGAAGAGCTGCGACACTCTTTCCCTA	19761.9
TDG_TG_f1AGT_f2CTTT_rep_10	10285	17756	17756	0	CGCAGCTCAGTTCTTTCTCGCGGAAGCGAGAAAGGACTGAGCTGCGACACTCTTTCCCTA	12590.2
TDG_TG_f1AAC_f2AGTG_rep_9	13198	30972	30972	0	CGCAGCTCAACTAGTGCTCGCGGAAGCGAGCACTGGTTGAGCTGCGACACTCTTTCCCTA	21871.7
TDG_TG_f1CAT_f2GGTG_rep_3	21127	42692	42692	0	CGCAGCTCCATTGGTGCTCGCGGAAGCGAGCACCGATGGAGCTGCGACACTCTTTCCCTA	29969.5
TDG_TG_f1CAC_f2CGCG_rep_10	15078	25191	25191	0	CGCAGCTCCACTCGCGCTCGCGGAAGCGAGCGCGGGTGGAGCTGCGACACTCTTTCCCTA	17825.6
TDG_TG_f1GGT_f2AACA_rep_10	15388	30618	30618	0	CGCAGCTCGGTTAACACTCGCGGAAGCGAGTGTTGACCGAGCTGCGACACTCTTTCCCTA	21472.8
TDG_TG_f1TAT_f2ACTT_rep_8	12388	27004	27004	0	CGCAGCTCTATTACTTCTCGCGGAAGCGAGAAGTGATAGAGCTGCGACACTCTTTCCCTA	19147.6
TDG_TG_f1TCC_f2GCTT_rep_1	18557	33887	33887	0	CGCAGCTCTCCTGCTTCTCGCGGAAGCGAGAAGCGGGAGAGCTGCGACACTCTTTCCCTA	24067.2
TDG_TG_f1GCA_f2TTTC_rep_7	12551	24877	24877	0	CGCAGCTCGCATTTTCCTCGCGGAAGCGAGGAAAGTGCGAGCTGCGACACTCTTTCCCTA	17639.4
TDG_TG_f1GGA_f2CCAA_rep_6	10936	22207	22207	0	CGCAGCTCGGATCCAACTCGCGGAAGCGAGTTGGGTCCGAGCTGCGACACTCTTTCCCTA	15852
TDG_TG_f1CAG_f2GGCA_rep_9	29805	54557	58827	0	CGCAGCTCCAGTGGCACTCGCGGAAGCGAGTGCCGCTGGAGCTGCGACACTCTTTCCCTA	41973.1
TDG_TG_f1CAC_f2GCGT_rep_9	23268	45963	45963	0	CGCAGCTCCACTGCGTCTCGCGGAAGCGAGACGCGGTGGAGCTGCGACACTCTTTCCCTA	32809.8
TDG_TG_f1AGC_f2ATGA_rep_6	10284	25243	25243	0	CGCAGCTCAGCTATGACTCGCGGAAGCGAGTCATGGCTGAGCTGCGACACTCTTTCCCTA	18256.9
TDG_TG_f1TTT_f2TGGT_rep_2	10473	18641	18641	0	CGCAGCTCTTTTTGGTCTCGCGGAAGCGAGACCAGAAAGAGCTGCGACACTCTTTCCCTA	13624.9
TDG_TG_f1ACC_f2AACT_rep_1	11491	24102	24102	0	CGCAGCTCACCTAACTCTCGCGGAAGCGAGAGTTGGGTGAGCTGCGACACTCTTTCCCTA	17968
TDG_TG_f1AGT_f2GATA_rep_1	17100	39949	39949	0	CGCAGCTCAGTTGATACTCGCGGAAGCGAGTATCGACTGAGCTGCGACACTCTTTCCCTA	30162.3
TDG_TG_f1TTG_f2GAAT_rep_9	21320	36518	36518	0	CGCAGCTCTTGTGAATCTCGCGGAAGCGAGATTCGCAAGAGCTGCGACACTCTTTCCCTA	27523.5
TDG_TG_f1TCT_f2AGAT_rep_6	13022	27548	27548	0	CGCAGCTCTCTTAGATCTCGCGGAAGCGAGATCTGAGAGAGCTGCGACACTCTTTCCCTA	20804.8
TDG_TG_f1CCC_f2AAAA_rep_7	10398	22032	22032	0	CGCAGCTCCCCTAAAACTCGCGGAAGCGAGTTTTGGGGGAGCTGCGACACTCTTTCCCTA	16657.5
TDG_TG_f1TCT_f2TCTA_rep_5	9809	16023	16023	0	CGCAGCTCTCTTTCTACTCGCGGAAGCGAGTAGAGAGAGAGCTGCGACACTCTTTCCCTA	12069.8
TDG_TG_f1TTA_f2GGGG_rep_2	17501	35661	35661	0	CGCAGCTCTTATGGGGCTCGCGGAAGCGAGCCCCGTAAGAGCTGCGACACTCTTTCCCTA	27164.9
TDG_TG_f1TCT_f2CTGC_rep_1	10023	19716	19716	0	CGCAGCTCTCTTCTGCCTCGCGGAAGCGAGGCAGGAGAGAGCTGCGACACTCTTTCCCTA	14859.6
TDG_TG_f1GAG_f2TCGA_rep_4	9905	20826	20826	0	CGCAGCTCGAGTTCGACTCGCGGAAGCGAGTCGAGCTCGAGCTGCGACACTCTTTCCCTA	15689.9
TDG_TG_f1ATC_f2GCGG_rep_10	20033	41337	41337	0	CGCAGCTCATCTGCGGCTCGCGGAAGCGAGCCGCGGATGAGCTGCGACACTCTTTCCCTA	31132.8
TDG_TG_f1TCT_f2CCGT_rep_1	10730	20688	20688	0	CGCAGCTCTCTTCCGTCTCGCGGAAGCGAGACGGGAGAGAGCTGCGACACTCTTTCCCTA	15500
TDG_TG_f1ACG_f2AACC_rep_2	13767	23669	23669	0	CGCAGCTCACGTAACCCTCGCGGAAGCGAGGGTTGCGTGAGCTGCGACACTCTTTCCCTA	17261.7
TDG_TG_f1CTA_f2ATGT_rep_8	11425	23882	23882	0	CGCAGCTCCTATATGTCTCGCGGAAGCGAGACATGTAGGAGCTGCGACACTCTTTCCCTA	17092.2
TDG_TG_f1TAC_f2TGAC_rep_2	10032	21744	21744	0	CGCAGCTCTACTTGACCTCGCGGAAGCGAGGTCAGGTAGAGCTGCGACACTCTTTCCCTA	14889.9
TDG_TG_f1CAT_f2ACTT_rep_9	14242	29090	29090	0	CGCAGCTCCATTACTTCTCGCGGAAGCGAGAAGTGATGGAGCTGCGACACTCTTTCCCTA	19448.6
TDG_TG_f1ACT_f2TGAC_rep_8	10498	23061	23061	0	CGCAGCTCACTTTGACCTCGCGGAAGCGAGGTCAGAGTGAGCTGCGACACTCTTTCCCTA	15037.2
TDG_TG_f1TTA_f2TAGG_rep_10	9894	19499	19499	0	CGCAGCTCTTATTAGGCTCGCGGAAGCGAGCCTAGTAAGAGCTGCGACACTCTTTCCCTA	12467.8
TDG_TG_f1AAC_f2ACTG_rep_4	14294	28026	28026	0	CGCAGCTCAACTACTGCTCGCGGAAGCGAGCAGTGGTTGAGCTGCGACACTCTTTCCCTA	17907.9
TDG_TG_f1GGT_f2GACC_rep_2	18320	38093	38093	0	CGCAGCTCGGTTGACCCTCGCGGAAGCGAGGGTCGACCGAGCTGCGACACTCTTTCCCTA	24174.1
TDG_TG_f1TCT_f2AAAC_rep_5	14437	29370	29370	0	CGCAGCTCTCTTAAACCTCGCGGAAGCGAGGTTTGAGAGAGCTGCGACACTCTTTCCCTA	18638.4
TDG_TG_f1ATA_f2CCCA_rep_1	11918	24186	24186	0	CGCAGCTCATATCCCACTCGCGGAAGCGAGTGGGGTATGAGCTGCGACACTCTTTCCCTA	15269.9
TDG_TG_f1AGG_f2TCGC_rep_9	13896	26583	26583	0	CGCAGCTCAGGTTCGCCTCGCGGAAGCGAGGCGAGCCTGAGCTGCGACACTCTTTCCCTA	16653.1
TDG_TG_f1GCA_f2GCAA_rep_2	24789	54602	49052	0	CGCAGCTCGCATGCAACTCGCGGAAGCGAGTTGCGTGCGAGCTGCGACACTCTTTCCCTA	30703.5
dBr_8187	13512	31330	31330	0	CGCTAGATTTTCACGAAGCGCGGAAGCGCTTCGTGAAAATCTAGCGACACTCTTTCCCTA	19474
TDG_TG_f1TTT_f2CCCC_rep_6	14498	29840	29840	0	CGCAGCTCTTTTCCCCCTCGCGGAAGCGAGGGGGGAAAGAGCTGCGACACTCTTTCCCTA	18203
dBr_7977	14013	24112	24112	0	CGCACTCTGTTACATATGCGCGGAAGCGCATATGTAACAGAGTGCGACACTCTTTCCCTA	14847.9
TDG_TG_f1ACG_f2CAAA_rep_5	12162	25958	25958	0	CGCAGCTCACGTCAAACTCGCGGAAGCGAGTTTGGCGTGAGCTGCGACACTCTTTCCCTA	16011.3
TDG_TG_f1GTT_f2CTTT_rep_8	12079	24916	24916	0	CGCAGCTCGTTTCTTTCTCGCGGAAGCGAGAAAGGAACGAGCTGCGACACTCTTTCCCTA	15582.9
TDG_TG_f1AAA_f2CACC_rep_4	12424	22003	22003	0	CGCAGCTCAAATCACCCTCGCGGAAGCGAGGGTGGTTTGAGCTGCGACACTCTTTCCCTA	13683.8
TDG_TG_f1GTC_f2GATA_rep_4	18941	43118	43118	0	CGCAGCTCGTCTGATACTCGCGGAAGCGAGTATCGGACGAGCTGCGACACTCTTTCCCTA	26990.6
TDG_TG_f1CAG_f2CTCG_rep_9	18519	34490	34490	0	CGCAGCTCCAGTCTCGCTCGCGGAAGCGAGCGAGGCTGGAGCTGCGACACTCTTTCCCTA	21702.4
TDG_TG_f1GAT_f2CCTC_rep_9	13396	22635	22635	0	CGCAGCTCGATTCCTCCTCGCGGAAGCGAGGAGGGATCGAGCTGCGACACTCTTTCCCTA	14410.3
TDG_TG_f1GTG_f2AAGG_rep_7	14541	28622	28622	0	CGCAGCTCGTGTAAGGCTCGCGGAAGCGAGCCTTGCACGAGCTGCGACACTCTTTCCCTA	18140.4
TDG_TG_f1GAC_f2ACCA_rep_3	14094	27704	27704	0	CGCAGCTCGACTACCACTCGCGGAAGCGAGTGGTGGTCGAGCTGCGACACTCTTTCCCTA	17558.5
TDG_TG_f1CTA_f2TATG_rep_1	10396	21363	21363	0	CGCAGCTCCTATTATGCTCGCGGAAGCGAGCATAGTAGGAGCTGCGACACTCTTTCCCTA	13630.4
TDG_TG_random_5TG_8_rep_2	10446	19950	19950	0	CGCTATTATTAACTAGCTCGCGGAAGCGGGCTGGTTGGTAATGGCGACACTCTTTCCCTA	12767.9
TDG_TG_f1TCG_f2GACG_rep_9	29882	60894	58977	0	CGCAGCTCTCGTGACGCTCGCGGAAGCGAGCGTCGCGAGAGCTGCGACACTCTTTCCCTA	38051.6
TDG_TG_f1TAC_f2ATGC_rep_2	14202	26344	26344	0	CGCAGCTCTACTATGCCTCGCGGAAGCGAGGCATGGTAGAGCTGCGACACTCTTTCCCTA	17027.4
TDG_TG_f1AAG_f2ACAA_rep_2	14026	27849	27849	0	CGCAGCTCAAGTACAACTCGCGGAAGCGAGTTGTGCTTGAGCTGCGACACTCTTTCCCTA	18247.9
TDG_TG_f1ATA_f2ATTG_rep_1	13889	28841	28841	0	CGCAGCTCATATATTGCTCGCGGAAGCGAGCAATGTATGAGCTGCGACACTCTTTCCCTA	18822
TDG_TG_f1ACG_f2ACTA_rep_7	13457	26352	26352	0	CGCAGCTCACGTACTACTCGCGGAAGCGAGTAGTGCGTGAGCTGCGACACTCTTTCCCTA	17197.7
TDG_TG_f1CTG_f2GACC_rep_7	24720	47536	47536	0	CGCAGCTCCTGTGACCCTCGCGGAAGCGAGGGTCGCAGGAGCTGCGACACTCTTTCCCTA	31141.6
TDG_TG_f1TAG_f2GCTT_rep_5	24990	51998	49443	0	CGCAGCTCTAGTGCTTCTCGCGGAAGCGAGAAGCGCTAGAGCTGCGACACTCTTTCCCTA	32175.1
TDG_TG_f1CGC_f2GACT_rep_4	20752	39306	39306	0	CGCAGCTCCGCTGACTCTCGCGGAAGCGAGAGTCGGCGGAGCTGCGACACTCTTTCCCTA	25356.2
TDG_TG_f1CCG_f2CCTG_rep_5	12427	23032	23032	0	CGCAGCTCCCGTCCTGCTCGCGGAAGCGAGCAGGGCGGGAGCTGCGACACTCTTTCCCTA	14854.5
TDG_TG_f1TCA_f2AGCT_rep_8	12523	22740	22740	0	CGCAGCTCTCATAGCTCTCGCGGAAGCGAGAGCTGTGAGAGCTGCGACACTCTTTCCCTA	14543.1
TDG_TG_f1AAG_f2AATG_rep_2	13894	26969	26969	0	CGCAGCTCAAGTAATGCTCGCGGAAGCGAGCATTGCTTGAGCTGCGACACTCTTTCCCTA	17247.7
TDG_TG_f1TAC_f2TGCC_rep_10	11938	25002	25002	0	CGCAGCTCTACTTGCCCTCGCGGAAGCGAGGGCAGGTAGAGCTGCGACACTCTTTCCCTA	15989.7
TDG_TG_f1TAA_f2ATCT_rep_10	12874	24678	24678	0	CGCAGCTCTAATATCTCTCGCGGAAGCGAGAGATGTTAGAGCTGCGACACTCTTTCCCTA	15553.1
TDG_TG_f1GTC_f2ACCA_rep_6	14146	28664	28664	0	CGCAGCTCGTCTACCACTCGCGGAAGCGAGTGGTGGACGAGCTGCGACACTCTTTCCCTA	17768.1
TDG_TG_f1CGC_f2GTTC_rep_6	19192	36366	36366	0	CGCAGCTCCGCTGTTCCTCGCGGAAGCGAGGAACGGCGGAGCTGCGACACTCTTTCCCTA	22682.6
TDG_TG_f1AGC_f2GGTT_rep_7	19231	37209	37209	0	CGCAGCTCAGCTGGTTCTCGCGGAAGCGAGAACCGGCTGAGCTGCGACACTCTTTCCCTA	22861.5
TDG_TG_f1AAG_f2GTAC_rep_8	27188	54506	53727	0	CGCAGCTCAAGTGTACCTCGCGGAAGCGAGGTACGCTTGAGCTGCGACACTCTTTCCCTA	32978.7
TDG_TG_f1TAA_f2AACA_rep_7	13665	25734	25734	0	CGCAGCTCTAATAACACTCGCGGAAGCGAGTGTTGTTAGAGCTGCGACACTCTTTCCCTA	15591.4
TDG_TG_f1GCT_f2TTCC_rep_7	13220	26448	26448	0	CGCAGCTCGCTTTTCCCTCGCGGAAGCGAGGGAAGAGCGAGCTGCGACACTCTTTCCCTA	16234.3
TDG_TG_f1ACG_f2CTAC_rep_7	12252	21449	21449	0	CGCAGCTCACGTCTACCTCGCGGAAGCGAGGTAGGCGTGAGCTGCGACACTCTTTCCCTA	13178.5
TDG_TG_f1TGG_f2AACC_rep_4	13909	29365	29365	0	CGCAGCTCTGGTAACCCTCGCGGAAGCGAGGGTTGCCAGAGCTGCGACACTCTTTCCCTA	18042.1
TDG_TG_f1TGA_f2CAGC_rep_1	10868	18489	18489	0	CGCAGCTCTGATCAGCCTCGCGGAAGCGAGGCTGGTCAGAGCTGCGACACTCTTTCCCTA	11464.2
TDG_TG_f1AAG_f2GCTG_rep_2	26050	53307	51509	0	CGCAGCTCAAGTGCTGCTCGCGGAAGCGAGCAGCGCTTGAGCTGCGACACTCTTTCCCTA	32362.3
TDG_TG_f1ATC_f2GAGA_rep_4	16505	36031	36031	0	CGCAGCTCATCTGAGACTCGCGGAAGCGAGTCTCGGATGAGCTGCGACACTCTTTCCCTA	23004.7
TDG_TG_f1TTG_f2GTCC_rep_3	26161	51000	51725	0	CGCAGCTCTTGTGTCCCTCGCGGAAGCGAGGGACGCAAGAGCTGCGACACTCTTTCCCTA	33352.4
TDG_TG_f1CTA_f2GCAC_rep_5	19428	37123	37123	0	CGCAGCTCCTATGCACCTCGCGGAAGCGAGGTGCGTAGGAGCTGCGACACTCTTTCCCTA	24227.4
TDG_TG_f1GAC_f2CAGT_rep_4	9507	20566	20566	0	CGCAGCTCGACTCAGTCTCGCGGAAGCGAGACTGGGTCGAGCTGCGACACTCTTTCCCTA	13653.4
TDG_TG_f1CTT_f2GATG_rep_6	16989	33808	33808	0	CGCAGCTCCTTTGATGCTCGCGGAAGCGAGCATCGAAGGAGCTGCGACACTCTTTCCCTA	22774.9
TDG_TG_f1TAA_f2CTCG_rep_3	10780	19350	19350	0	CGCAGCTCTAATCTCGCTCGCGGAAGCGAGCGAGGTTAGAGCTGCGACACTCTTTCCCTA	13035.2
dBr_4023	10991	24637	24637	0	CGCTTTATTACGCAAGCTCGCGGAAGCGAGCTTGCGTAATAAAGCGACACTCTTTCCCTA	16739.8
TDG_TG_f1CAA_f2GTTC_rep_4	17326	34023	34023	0	CGCAGCTCCAATGTTCCTCGCGGAAGCGAGGAACGTTGGAGCTGCGACACTCTTTCCCTA	23226.3
TDG_TG_f1GAG_f2GCTT_rep_10	24165	41339	41339	0	CGCAGCTCGAGTGCTTCTCGCGGAAGCGAGAAGCGCTCGAGCTGCGACACTCTTTCCCTA	28384.9
TDG_TG_f1CAT_f2GAAC_rep_3	18360	38985	38985	0	CGCAGCTCCATTGAACCTCGCGGAAGCGAGGTTCGATGGAGCTGCGACACTCTTTCCCTA	26763.1
TDG_TG_f1AAT_f2CTAC_rep_4	10368	17120	17120	0	CGCAGCTCAATTCTACCTCGCGGAAGCGAGGTAGGATTGAGCTGCGACACTCTTTCCCTA	11687.2
TDG_TG_f1GAT_f2CTAA_rep_9	11701	19916	19916	0	CGCAGCTCGATTCTAACTCGCGGAAGCGAGTTAGGATCGAGCTGCGACACTCTTTCCCTA	13596
TDG_TG_f1TGG_f2GCTT_rep_8	23373	46029	46029	0	CGCAGCTCTGGTGCTTCTCGCGGAAGCGAGAAGCGCCAGAGCTGCGACACTCTTTCCCTA	31385.8
TDG_TG_f1CTT_f2GGTA_rep_7	18270	33626	33626	0	CGCAGCTCCTTTGGTACTCGCGGAAGCGAGTACCGAAGGAGCTGCGACACTCTTTCCCTA	22672.1
TDG_TG_f1CCC_f2TGAA_rep_8	16472	34994	34994	0	CGCAGCTCCCCTTGAACTCGCGGAAGCGAGTTCAGGGGGAGCTGCGACACTCTTTCCCTA	23594.5
TDG_TG_f1CCG_f2TCGT_rep_7	11708	25004	25004	0	CGCAGCTCCCGTTCGTCTCGCGGAAGCGAGACGAGCGGGAGCTGCGACACTCTTTCCCTA	16844.1
TDG_TG_f1ATA_f2TATA_rep_4	9994	18330	18330	0	CGCAGCTCATATTATACTCGCGGAAGCGAGTATAGTATGAGCTGCGACACTCTTTCCCTA	12309.1
TDG_TG_f1GGC_f2GTCA_rep_2	20343	36668	36668	0	CGCAGCTCGGCTGTCACTCGCGGAAGCGAGTGACGGCCGAGCTGCGACACTCTTTCCCTA	24518.9
TDG_TG_f1TGC_f2TGGA_rep_6	9963	21769	21769	0	CGCAGCTCTGCTTGGACTCGCGGAAGCGAGTCCAGGCAGAGCTGCGACACTCTTTCCCTA	14375.4
dBr_3542	10533	20778	20778	0	CGCTTAGCTTGTACTTAGCGCGGAAGCGCTAAGTACAAGCTAAGCGACACTCTTTCCCTA	13606.5
TDG_TG_f1CAT_f2GCGG_rep_7	24616	46732	46732	0	CGCAGCTCCATTGCGGCTCGCGGAAGCGAGCCGCGATGGAGCTGCGACACTCTTTCCCTA	30964
TDG_TG_f1AGT_f2TCTG_rep_5	10082	22789	22789	0	CGCAGCTCAGTTTCTGCTCGCGGAAGCGAGCAGAGACTGAGCTGCGACACTCTTTCCCTA	15181.7
TDG_TG_f1ATC_f2CCTG_rep_10	12807	21883	21883	0	CGCAGCTCATCTCCTGCTCGCGGAAGCGAGCAGGGGATGAGCTGCGACACTCTTTCCCTA	14632.6
TDG_TG_f1AGT_f2ATAA_rep_2	13716	24182	24182	0	CGCAGCTCAGTTATAACTCGCGGAAGCGAGTTATGACTGAGCTGCGACACTCTTTCCCTA	16252
TDG_TG_f1GTG_f2TGAG_rep_3	11283	22817	22817	0	CGCAGCTCGTGTTGAGCTCGCGGAAGCGAGCTCAGCACGAGCTGCGACACTCTTTCCCTA	15339.8
TDG_TG_f1TGA_f2ACTT_rep_9	12508	21605	21605	0	CGCAGCTCTGATACTTCTCGCGGAAGCGAGAAGTGTCAGAGCTGCGACACTCTTTCCCTA	14590.2
TDG_TG_f1TTA_f2TGAA_rep_8	9177	15020	15020	0	CGCAGCTCTTATTGAACTCGCGGAAGCGAGTTCAGTAAGAGCTGCGACACTCTTTCCCTA	10131.6
TDG_TG_f1AAG_f2TAGT_rep_5	8164	16020	16020	0	CGCAGCTCAAGTTAGTCTCGCGGAAGCGAGACTAGCTTGAGCTGCGACACTCTTTCCCTA	10843.1
TDG_TG_f1AGT_f2TCTT_rep_3	10449	17386	17386	0	CGCAGCTCAGTTTCTTCTCGCGGAAGCGAGAAGAGACTGAGCTGCGACACTCTTTCCCTA	12035.6
TDG_TG_f1CTT_f2GTAT_rep_1	18512	33637	33637	0	CGCAGCTCCTTTGTATCTCGCGGAAGCGAGATACGAAGGAGCTGCGACACTCTTTCCCTA	23285.5
TDG_TG_f1AGA_f2CTAC_rep_1	9539	21380	21380	0	CGCAGCTCAGATCTACCTCGCGGAAGCGAGGTAGGTCTGAGCTGCGACACTCTTTCCCTA	14934.9
TDG_TG_f1GGG_f2GACT_rep_8	23670	41719	41719	0	CGCAGCTCGGGTGACTCTCGCGGAAGCGAGAGTCGCCCGAGCTGCGACACTCTTTCCCTA	29441.5
TDG_TG_f1AGT_f2GTCC_rep_1	21090	38766	38766	0	CGCAGCTCAGTTGTCCCTCGCGGAAGCGAGGGACGACTGAGCTGCGACACTCTTTCCCTA	27372.9
TDG_TG_f1GTC_f2TGCA_rep_9	12388	27285	27285	0	CGCAGCTCGTCTTGCACTCGCGGAAGCGAGTGCAGGACGAGCTGCGACACTCTTTCCCTA	19266.1
TDG_TG_f1CAA_f2GCCC_rep_2	18002	37799	37799	0	CGCAGCTCCAATGCCCCTCGCGGAAGCGAGGGGCGTTGGAGCTGCGACACTCTTTCCCTA	26536.8
TDG_TG_f1CGC_f2GGAG_rep_7	18466	37812	37812	0	CGCAGCTCCGCTGGAGCTCGCGGAAGCGAGCTCCGGCGGAGCTGCGACACTCTTTCCCTA	26699.2
TDG_TG_f1CAA_f2GGGA_rep_5	16477	36059	36059	0	CGCAGCTCCAATGGGACTCGCGGAAGCGAGTCCCGTTGGAGCTGCGACACTCTTTCCCTA	25315.2
TDG_TG_f1TGG_f2ACTT_rep_7	12804	24083	24083	0	CGCAGCTCTGGTACTTCTCGCGGAAGCGAGAAGTGCCAGAGCTGCGACACTCTTTCCCTA	17005.1
TDG_TG_f1TTA_f2CGGG_rep_7	10856	22022	22022	0	CGCAGCTCTTATCGGGCTCGCGGAAGCGAGCCCGGTAAGAGCTGCGACACTCTTTCCCTA	15501.9
TDG_TG_f1TAC_f2GGTA_rep_6	20073	42352	42352	0	CGCAGCTCTACTGGTACTCGCGGAAGCGAGTACCGGTAGAGCTGCGACACTCTTTCCCTA	30174.5
TDG_TG_f1CCA_f2AACG_rep_5	14057	25321	25321	0	CGCAGCTCCCATAACGCTCGCGGAAGCGAGCGTTGTGGGAGCTGCGACACTCTTTCCCTA	18130.5
TDG_TG_f1GGT_f2CTCA_rep_3	9937	20913	20913	0	CGCAGCTCGGTTCTCACTCGCGGAAGCGAGTGAGGACCGAGCTGCGACACTCTTTCCCTA	15133.6
TDG_TG_f1TGG_f2GCAC_rep_7	23836	47436	47436	0	CGCAGCTCTGGTGCACCTCGCGGAAGCGAGGTGCGCCAGAGCTGCGACACTCTTTCCCTA	34451.6
TDG_TG_f1TTT_f2GTGC_rep_1	14128	25624	25624	0	CGCAGCTCTTTTGTGCCTCGCGGAAGCGAGGCACGAAAGAGCTGCGACACTCTTTCCCTA	18652.7
TDG_TG_f1GCA_f2ACGC_rep_10	12943	25149	25149	0	CGCAGCTCGCATACGCCTCGCGGAAGCGAGGCGTGTGCGAGCTGCGACACTCTTTCCCTA	18723.5
TDG_TG_f1TTT_f2ACAC_rep_7	11218	23809	23809	0	CGCAGCTCTTTTACACCTCGCGGAAGCGAGGTGTGAAAGAGCTGCGACACTCTTTCCCTA	17892.8
TDG_TG_f1TCT_f2GGTC_rep_6	16351	30618	30618	0	CGCAGCTCTCTTGGTCCTCGCGGAAGCGAGGACCGAGAGAGCTGCGACACTCTTTCCCTA	22973.8
TDG_TG_f1ATA_f2GGGC_rep_10	15849	34315	34315	0	CGCAGCTCATATGGGCCTCGCGGAAGCGAGGCCCGTATGAGCTGCGACACTCTTTCCCTA	26054.3
TDG_TG_f1ACT_f2ATAA_rep_8	10726	22976	22976	0	CGCAGCTCACTTATAACTCGCGGAAGCGAGTTATGAGTGAGCTGCGACACTCTTTCCCTA	17718
TDG_TG_f1CTG_f2GATG_rep_5	20908	41440	41440	0	CGCAGCTCCTGTGATGCTCGCGGAAGCGAGCATCGCAGGAGCTGCGACACTCTTTCCCTA	32403.5
TDG_TG_f1ATA_f2ATAA_rep_9	10243	21379	21379	0	CGCAGCTCATATATAACTCGCGGAAGCGAGTTATGTATGAGCTGCGACACTCTTTCCCTA	16997
TDG_TG_f1AGA_f2ACCG_rep_1	11229	22688	22688	0	CGCAGCTCAGATACCGCTCGCGGAAGCGAGCGGTGTCTGAGCTGCGACACTCTTTCCCTA	18434.3
TDG_TG_f1CAT_f2CACC_rep_8	10368	19312	19312	0	CGCAGCTCCATTCACCCTCGCGGAAGCGAGGGTGGATGGAGCTGCGACACTCTTTCCCTA	15881.8
TDG_TG_f1CTT_f2TAGC_rep_9	8660	17594	17594	0	CGCAGCTCCTTTTAGCCTCGCGGAAGCGAGGCTAGAAGGAGCTGCGACACTCTTTCCCTA	14781.5
TDG_TG_f1CGT_f2TATG_rep_4	9962	17533	17533	0	CGCAGCTCCGTTTATGCTCGCGGAAGCGAGCATAGACGGAGCTGCGACACTCTTTCCCTA	14764.6
TDG_TG_f1CTC_f2GCGT_rep_2	15652	28363	28363	0	CGCAGCTCCTCTGCGTCTCGCGGAAGCGAGACGCGGAGGAGCTGCGACACTCTTTCCCTA	24062.2
TDG_TG_f1TAG_f2TTCA_rep_4	7782	17470	17470	0	CGCAGCTCTAGTTTCACTCGCGGAAGCGAGTGAAGCTAGAGCTGCGACACTCTTTCCCTA	14972.6
TDG_TG_f1TCC_f2ATCC_rep_9	11023	21208	21208	0	CGCAGCTCTCCTATCCCTCGCGGAAGCGAGGGATGGGAGAGCTGCGACACTCTTTCCCTA	18621.8
TDG_TG_f1CAC_f2TAGG_rep_9	7682	13660	13660	0	CGCAGCTCCACTTAGGCTCGCGGAAGCGAGCCTAGGTGGAGCTGCGACACTCTTTCCCTA	12353.6
TDG_TG_f1GCT_f2ATGT_rep_8	9029	20013	20013	0	CGCAGCTCGCTTATGTCTCGCGGAAGCGAGACATGAGCGAGCTGCGACACTCTTTCCCTA	18567.7
dBr_1103	8138	18016	18016	0	CGCGTACACGGAACTATTCGCGGAAGCGAATAGTTCCGTGTACGCGACACTCTTTCCCTA	16885.5
TDG_TG_f1CCG_f2TGGT_rep_9	7127	13537	13537	0	CGCAGCTCCCGTTGGTCTCGCGGAAGCGAGACCAGCGGGAGCTGCGACACTCTTTCCCTA	12771.3
TDG_TG_f1ACT_f2TTGG_rep_3	6256	12173	12173	0	CGCAGCTCACTTTTGGCTCGCGGAAGCGAGCCAAGAGTGAGCTGCGACACTCTTTCCCTA	11550.8
TDG_TG_f1CTG_f2CGTG_rep_2	7087	14937	14937	0	CGCAGCTCCTGTCGTGCTCGCGGAAGCGAGCACGGCAGGAGCTGCGACACTCTTTCCCTA	14310.2
TDG_TG_f1GCT_f2GCTT_rep_5	13700	23890	23890	0	CGCAGCTCGCTTGCTTCTCGCGGAAGCGAGAAGCGAGCGAGCTGCGACACTCTTTCCCTA	23521.9
TDG_TG_f1CAA_f2CTTA_rep_1	6328	13157	13157	0	CGCAGCTCCAATCTTACTCGCGGAAGCGAGTAAGGTTGGAGCTGCGACACTCTTTCCCTA	13056
TDG_TG_f1GGA_f2AAAG_rep_6	7663	15241	15241	0	CGCAGCTCGGATAAAGCTCGCGGAAGCGAGCTTTGTCCGAGCTGCGACACTCTTTCCCTA	15171.4
TDG_TG_f1GGC_f2GTGA_rep_3	10898	19222	19222	0	CGCAGCTCGGCTGTGACTCGCGGAAGCGAGTCACGGCCGAGCTGCGACACTCTTTCCCTA	19197.2
TDG_TG_f1GTT_f2CCTC_rep_2	7140	14442	14442	0	CGCAGCTCGTTTCCTCCTCGCGGAAGCGAGGAGGGAACGAGCTGCGACACTCTTTCCCTA	14406.4
TDG_TG_f1TAG_f2ACCG_rep_5	10183	21012	21012	0	CGCAGCTCTAGTACCGCTCGCGGAAGCGAGCGGTGCTAGAGCTGCGACACTCTTTCCCTA	20885.4
TDG_TG_f1ACA_f2TCGT_rep_2	7256	14431	14431	0	CGCAGCTCACATTCGTCTCGCGGAAGCGAGACGAGTGTGAGCTGCGACACTCTTTCCCTA	14342.4
TDG_TG_f1GGG_f2TGGC_rep_5	6802	13771	13771	0	CGCAGCTCGGGTTGGCCTCGCGGAAGCGAGGCCAGCCCGAGCTGCGACACTCTTTCCCTA	13656.5
TDG_TG_f1CGG_f2CGCG_rep_10	11035	22508	22508	0	CGCAGCTCCGGTCGCGCTCGCGGAAGCGAGCGCGGCCGGAGCTGCGACACTCTTTCCCTA	22371.1
TDG_TG_f1TGC_f2CTTA_rep_6	6537	11404	11404	0	CGCAGCTCTGCTCTTACTCGCGGAAGCGAGTAAGGGCAGAGCTGCGACACTCTTTCCCTA	11357.2
TDG_TG_f1TTC_f2ATCT_rep_5	11069	22825	22825	0	CGCAGCTCTTCTATCTCTCGCGGAAGCGAGAGATGGAAGAGCTGCGACACTCTTTCCCTA	22686.2
TDG_TG_f1AAA_f2CGCA_rep_2	8307	17625	17625	0	CGCAGCTCAAATCGCACTCGCGGAAGCGAGTGCGGTTTGAGCTGCGACACTCTTTCCCTA	17505.5
TDG_TG_f1GCT_f2AAGA_rep_8	8514	15285	15285	0	CGCAGCTCGCTTAAGACTCGCGGAAGCGAGTCTTGAGCGAGCTGCGACACTCTTTCCCTA	15207.2
TDG_TG_f1TCT_f2CAAG_rep_7	6394	13934	13934	0	CGCAGCTCTCTTCAAGCTCGCGGAAGCGAGCTTGGAGAGAGCTGCGACACTCTTTCCCTA	13849.3
TDG_TG_f1AGA_f2TTGT_rep_7	6022	12353	12353	0	CGCAGCTCAGATTTGTCTCGCGGAAGCGAGACAAGTCTGAGCTGCGACACTCTTTCCCTA	12261.4
TDG_TG_f1AAT_f2CACT_rep_2	8164	13907	13907	0	CGCAGCTCAATTCACTCTCGCGGAAGCGAGAGTGGATTGAGCTGCGACACTCTTTCCCTA	13617
dBr_0582	9815	19122	19122	0	CGCAACACCGTACATCAGCGCGGAAGCGCTGATGTACGGTGTTGCGACACTCTTTCCCTA	18629.9
TDG_TG_f1GTG_f2CGCC_rep_6	9681	19292	19292	0	CGCAGCTCGTGTCGCCCTCGCGGAAGCGAGGGCGGCACGAGCTGCGACACTCTTTCCCTA	18795.5
TDG_TG_f1TCG_f2TAAT_rep_2	6817	13291	13291	0	CGCAGCTCTCGTTAATCTCGCGGAAGCGAGATTAGCGAGAGCTGCGACACTCTTTCCCTA	13036.4
TDG_TG_f1CGC_f2TCAC_rep_2	8401	15238	15238	0	CGCAGCTCCGCTTCACCTCGCGGAAGCGAGGTGAGGCGGAGCTGCGACACTCTTTCCCTA	14922.8
TDG_TG_f1CTT_f2AGCC_rep_6	11147	22912	22912	0	CGCAGCTCCTTTAGCCCTCGCGGAAGCGAGGGCTGAAGGAGCTGCGACACTCTTTCCCTA	22382.6
TDG_TG_f1CCG_f2AGCA_rep_8	11854	22311	22311	0	CGCAGCTCCCGTAGCACTCGCGGAAGCGAGTGCTGCGGGAGCTGCGACACTCTTTCCCTA	21818.7
TDG_TG_f1TAA_f2TATG_rep_7	6376	14076	14076	0	CGCAGCTCTAATTATGCTCGCGGAAGCGAGCATAGTTAGAGCTGCGACACTCTTTCCCTA	13780.1
TDG_TG_f1GAT_f2GAAA_rep_3	13955	27793	27793	0	CGCAGCTCGATTGAAACTCGCGGAAGCGAGTTTCGATCGAGCTGCGACACTCTTTCCCTA	27114.2
TDG_TG_f1CGC_f2TCCT_rep_10	8818	18096	18096	0	CGCAGCTCCGCTTCCTCTCGCGGAAGCGAGAGGAGGCGGAGCTGCGACACTCTTTCCCTA	17696.7
TDG_TG_f1GAT_f2CGTA_rep_9	9145	20224	20224	0	CGCAGCTCGATTCGTACTCGCGGAAGCGAGTACGGATCGAGCTGCGACACTCTTTCCCTA	19579.5
TDG_TG_f1GTG_f2GGTC_rep_3	18992	39239	39239	0	CGCAGCTCGTGTGGTCCTCGCGGAAGCGAGGACCGCACGAGCTGCGACACTCTTTCCCTA	37595.6
TDG_TG_f1AAT_f2TAGG_rep_5	6997	12578	12578	0	CGCAGCTCAATTTAGGCTCGCGGAAGCGAGCCTAGATTGAGCTGCGACACTCTTTCCCTA	12026.1
TDG_TG_f1TGA_f2TACC_rep_9	6609	14654	14654	0	CGCAGCTCTGATTACCCTCGCGGAAGCGAGGGTAGTCAGAGCTGCGACACTCTTTCCCTA	13956.1
TDG_TG_f1TAA_f2AGTA_rep_10	8393	15717	15717	0	CGCAGCTCTAATAGTACTCGCGGAAGCGAGTACTGTTAGAGCTGCGACACTCTTTCCCTA	14930
TDG_TG_f1CAT_f2GCGT_rep_5	16131	30902	30902	0	CGCAGCTCCATTGCGTCTCGCGGAAGCGAGACGCGATGGAGCTGCGACACTCTTTCCCTA	29144.5
TDG_TG_f1CGA_f2TTGT_rep_7	7572	16087	16087	0	CGCAGCTCCGATTTGTCTCGCGGAAGCGAGACAAGTCGGAGCTGCGACACTCTTTCCCTA	15143.5
TDG_TG_f1GTA_f2TCGG_rep_6	8661	17629	17629	0	CGCAGCTCGTATTCGGCTCGCGGAAGCGAGCCGAGTACGAGCTGCGACACTCTTTCCCTA	16389
TDG_TG_f1GCA_f2AGAT_rep_1	9816	20761	20761	0	CGCAGCTCGCATAGATCTCGCGGAAGCGAGATCTGTGCGAGCTGCGACACTCTTTCCCTA	19163.4
TDG_TG_f1TGA_f2CCTG_rep_8	7295	14204	14204	0	CGCAGCTCTGATCCTGCTCGCGGAAGCGAGCAGGGTCAGAGCTGCGACACTCTTTCCCTA	13205.6
TDG_TG_f1TTA_f2GAGA_rep_6	12550	23269	23269	0	CGCAGCTCTTATGAGACTCGCGGAAGCGAGTCTCGTAAGAGCTGCGACACTCTTTCCCTA	21241.9
TDG_TG_f1GAA_f2GCGA_rep_6	14522	27163	27163	0	CGCAGCTCGAATGCGACTCGCGGAAGCGAGTCGCGTTCGAGCTGCGACACTCTTTCCCTA	24834
TDG_TG_f1TGA_f2TGAC_rep_1	7475	16110	16110	0	CGCAGCTCTGATTGACCTCGCGGAAGCGAGGTCAGTCAGAGCTGCGACACTCTTTCCCTA	14481.8
TDG_TG_f1CGA_f2TAAG_rep_8	7414	15839	15839	0	CGCAGCTCCGATTAAGCTCGCGGAAGCGAGCTTAGTCGGAGCTGCGACACTCTTTCCCTA	14225.4
TDG_TG_f1CTG_f2AGTA_rep_2	11527	21928	21928	0	CGCAGCTCCTGTAGTACTCGCGGAAGCGAGTACTGCAGGAGCTGCGACACTCTTTCCCTA	19478.4
TDG_TG_f1GAT_f2ATTT_rep_1	9144	22087	22087	0	CGCAGCTCGATTATTTCTCGCGGAAGCGAGAAATGATCGAGCTGCGACACTCTTTCCCTA	19587.4
TDG_TG_f1TGC_f2GTTG_rep_1	13972	27609	27609	0	CGCAGCTCTGCTGTTGCTCGCGGAAGCGAGCAACGGCAGAGCTGCGACACTCTTTCCCTA	24482
TDG_TG_f1AGC_f2GAGT_rep_4	13070	26246	26246	0	CGCAGCTCAGCTGAGTCTCGCGGAAGCGAGACTCGGCTGAGCTGCGACACTCTTTCCCTA	23117.2
dBr_0706	8404	17486	17486	0	CGCTCGTCCTACTCCTCCCGCGGAAGCGGGAGGAGTAGGACGAGCGACACTCTTTCCCTA	15380.3
TDG_TG_f1TTG_f2TCAA_rep_10	8340	15379	15379	0	CGCAGCTCTTGTTCAACTCGCGGAAGCGAGTTGAGCAAGAGCTGCGACACTCTTTCCCTA	13447.7
TDG_TG_f1TTC_f2CGCT_rep_9	9843	19196	19196	0	CGCAGCTCTTCTCGCTCTCGCGGAAGCGAGAGCGGGAAGAGCTGCGACACTCTTTCCCTA	16711.5
TDG_TG_f1ATG_f2ATCA_rep_8	13805	29210	29210	0	CGCAGCTCATGTATCACTCGCGGAAGCGAGTGATGCATGAGCTGCGACACTCTTTCCCTA	25134.5
dBr_0113	8654	18181	18181	0	CGCTCTTCGAAGCCTGTGCGCGGAAGCGCACAGGCTTCGAAGAGCGACACTCTTTCCCTA	15605.6
TDG_TG_f1CTG_f2GTGC_rep_9	17583	34625	34625	0	CGCAGCTCCTGTGTGCCTCGCGGAAGCGAGGCACGCAGGAGCTGCGACACTCTTTCCCTA	29636.5
TDG_TG_f1AAC_f2GCTG_rep_1	15575	33102	33102	0	CGCAGCTCAACTGCTGCTCGCGGAAGCGAGCAGCGGTTGAGCTGCGACACTCTTTCCCTA	28397.2
TDG_TG_f1GCC_f2GACA_rep_1	14565	30647	30647	0	CGCAGCTCGCCTGACACTCGCGGAAGCGAGTGTCGGGCGAGCTGCGACACTCTTTCCCTA	26518
TDG_TG_f1TTA_f2ACCT_rep_2	8885	18746	18746	0	CGCAGCTCTTATACCTCTCGCGGAAGCGAGAGGTGTAAGAGCTGCGACACTCTTTCCCTA	16157.5
TDG_TG_f1CAG_f2TTGC_rep_10	8792	15899	15899	0	CGCAGCTCCAGTTTGCCTCGCGGAAGCGAGGCAAGCTGGAGCTGCGACACTCTTTCCCTA	13635.2
TDG_TG_f1GGG_f2TTTC_rep_1	8740	18753	18753	0	CGCAGCTCGGGTTTTCCTCGCGGAAGCGAGGAAAGCCCGAGCTGCGACACTCTTTCCCTA	16126.7
TDG_TG_f1TGC_f2GGTC_rep_2	14390	29587	29587	0	CGCAGCTCTGCTGGTCCTCGCGGAAGCGAGGACCGGCAGAGCTGCGACACTCTTTCCCTA	25168.4
TDG_TG_f1TCA_f2CGAT_rep_6	8851	15935	15935	0	CGCAGCTCTCATCGATCTCGCGGAAGCGAGATCGGTGAGAGCTGCGACACTCTTTCCCTA	13387.1
TDG_TG_f1ACT_f2TAAT_rep_2	7298	15923	15923	0	CGCAGCTCACTTTAATCTCGCGGAAGCGAGATTAGAGTGAGCTGCGACACTCTTTCCCTA	13203.1
TDG_TG_f1ATC_f2GTAC_rep_4	15576	34562	34562	0	CGCAGCTCATCTGTACCTCGCGGAAGCGAGGTACGGATGAGCTGCGACACTCTTTCCCTA	28658.2
TDG_TG_f1TCC_f2TCTG_rep_3	9137	15295	15295	0	CGCAGCTCTCCTTCTGCTCGCGGAAGCGAGCAGAGGGAGAGCTGCGACACTCTTTCCCTA	12780.5
TDG_TG_f1GGG_f2ATAA_rep_9	10430	21856	21856	0	CGCAGCTCGGGTATAACTCGCGGAAGCGAGTTATGCCCGAGCTGCGACACTCTTTCCCTA	18321.5
TDG_TG_f1GAC_f2TCGC_rep_5	9709	20001	20001	0	CGCAGCTCGACTTCGCCTCGCGGAAGCGAGGCGAGGTCGAGCTGCGACACTCTTTCCCTA	16730.2
TDG_TG_f1CTT_f2GATC_rep_7	14311	27014	27014	0	CGCAGCTCCTTTGATCCTCGCGGAAGCGAGGATCGAAGGAGCTGCGACACTCTTTCCCTA	22645.3
TDG_TG_f1CGG_f2CTAC_rep_7	11388	21828	21828	0	CGCAGCTCCGGTCTACCTCGCGGAAGCGAGGTAGGCCGGAGCTGCGACACTCTTTCCCTA	18388.7
TDG_TG_f1CCC_f2ACGG_rep_10	10643	21788	21788	0	CGCAGCTCCCCTACGGCTCGCGGAAGCGAGCCGTGGGGGAGCTGCGACACTCTTTCCCTA	18212.4
TDG_TG_f1CCA_f2TCGC_rep_5	10003	18567	18567	0	CGCAGCTCCCATTCGCCTCGCGGAAGCGAGGCGAGTGGGAGCTGCGACACTCTTTCCCTA	15141.7
TDG_TG_f1TAG_f2ACCT_rep_7	10287	22979	22979	0	CGCAGCTCTAGTACCTCTCGCGGAAGCGAGAGGTGCTAGAGCTGCGACACTCTTTCCCTA	18574.9
TDG_TG_f1GCG_f2CAAG_rep_4	9315	19027	19027	0	CGCAGCTCGCGTCAAGCTCGCGGAAGCGAGCTTGGCGCGAGCTGCGACACTCTTTCCCTA	15241.5
TDG_TG_f1TAG_f2TTGG_rep_3	9186	14951	14951	0	CGCAGCTCTAGTTTGGCTCGCGGAAGCGAGCCAAGCTAGAGCTGCGACACTCTTTCCCTA	11920.5
TDG_TG_f1AAT_f2TTCT_rep_7	9232	20183	20183	0	CGCAGCTCAATTTTCTCTCGCGGAAGCGAGAGAAGATTGAGCTGCGACACTCTTTCCCTA	16035.6
TDG_TG_f1CGG_f2GTTG_rep_4	20902	41240	41240	0	CGCAGCTCCGGTGTTGCTCGCGGAAGCGAGCAACGCCGGAGCTGCGACACTCTTTCCCTA	32758
dBr_4505	12765	23443	23443	0	CGCGACGTACCGCAGACCCGCGGAAGCGGGTCTGCGGTACGTCGCGACACTCTTTCCCTA	18621.4
TDG_TG_f1GCC_f2CGAG_rep_4	11703	23315	23315	0	CGCAGCTCGCCTCGAGCTCGCGGAAGCGAGCTCGGGGCGAGCTGCGACACTCTTTCCCTA	17903.9
dBr_7825	12373	22658	22658	0	CGCGGATCTCATCTCGATCGCGGAAGCGATCGAGATGAGATCCGCGACACTCTTTCCCTA	17084.1
TDG_TG_f1TCT_f2GATC_rep_5	16854	33256	33256	0	CGCAGCTCTCTTGATCCTCGCGGAAGCGAGGATCGAGAGAGCTGCGACACTCTTTCCCTA	24897.7
TDG_TG_f1GGA_f2CCAA_rep_10	12008	23003	23003	0	CGCAGCTCGGATCCAACTCGCGGAAGCGAGTTGGGTCCGAGCTGCGACACTCTTTCCCTA	16789.7
TDG_TG_f1TAG_f2TCGA_rep_1	10387	24070	24070	0	CGCAGCTCTAGTTCGACTCGCGGAAGCGAGTCGAGCTAGAGCTGCGACACTCTTTCCCTA	17448.6
TDG_TG_f1TTC_f2TGGC_rep_1	12179	19891	19891	0	CGCAGCTCTTCTTGGCCTCGCGGAAGCGAGGCCAGGAAGAGCTGCGACACTCTTTCCCTA	14155.4
TDG_TG_f1GTT_f2TGAG_rep_6	11250	22838	22838	0	CGCAGCTCGTTTTGAGCTCGCGGAAGCGAGCTCAGAACGAGCTGCGACACTCTTTCCCTA	15907.6
TDG_TG_f1TGA_f2GTCG_rep_8	19005	37723	37723	0	CGCAGCTCTGATGTCGCTCGCGGAAGCGAGCGACGTCAGAGCTGCGACACTCTTTCCCTA	25995.5
TDG_TG_f1GTC_f2TCTA_rep_9	12772	22930	22930	0	CGCAGCTCGTCTTCTACTCGCGGAAGCGAGTAGAGGACGAGCTGCGACACTCTTTCCCTA	15570.3
TDG_TG_f1AAA_f2CTCC_rep_10	11964	24382	24382	0	CGCAGCTCAAATCTCCCTCGCGGAAGCGAGGGAGGTTTGAGCTGCGACACTCTTTCCCTA	16267.1
TDG_TG_f1AGT_f2CGCT_rep_7	14393	30077	30077	0	CGCAGCTCAGTTCGCTCTCGCGGAAGCGAGAGCGGACTGAGCTGCGACACTCTTTCCCTA	19876.3
TDG_TG_f1GGT_f2GGAC_rep_4	23070	41839	41839	0	CGCAGCTCGGTTGGACCTCGCGGAAGCGAGGTCCGACCGAGCTGCGACACTCTTTCCCTA	27514.4
TDG_TG_f1GCA_f2CTTG_rep_7	13285	26102	26102	0	CGCAGCTCGCATCTTGCTCGCGGAAGCGAGCAAGGTGCGAGCTGCGACACTCTTTCCCTA	16976.2
TDG_TG_f1TCA_f2GGAT_rep_9	18095	39549	39549	0	CGCAGCTCTCATGGATCTCGCGGAAGCGAGATCCGTGAGAGCTGCGACACTCTTTCCCTA	25615
TDG_TG_f1TAG_f2TGGG_rep_1	12192	23679	23679	0	CGCAGCTCTAGTTGGGCTCGCGGAAGCGAGCCCAGCTAGAGCTGCGACACTCTTTCCCTA	14993
TDG_TG_f1GTG_f2AATT_rep_2	14452	31399	31399	0	CGCAGCTCGTGTAATTCTCGCGGAAGCGAGAATTGCACGAGCTGCGACACTCTTTCCCTA	19717.3
TDG_TG_f1TGA_f2CGCA_rep_2	13783	28815	28815	0	CGCAGCTCTGATCGCACTCGCGGAAGCGAGTGCGGTCAGAGCTGCGACACTCTTTCCCTA	17894.4
TDG_TG_f1TAG_f2TCCG_rep_10	14531	25977	25977	0	CGCAGCTCTAGTTCCGCTCGCGGAAGCGAGCGGAGCTAGAGCTGCGACACTCTTTCCCTA	16096.6
TDG_TG_f1CAG_f2ATAC_rep_9	19290	39121	39121	0	CGCAGCTCCAGTATACCTCGCGGAAGCGAGGTATGCTGGAGCTGCGACACTCTTTCCCTA	24241.3
TDG_TG_f1GCT_f2ACAC_rep_5	16629	31365	31365	0	CGCAGCTCGCTTACACCTCGCGGAAGCGAGGTGTGAGCGAGCTGCGACACTCTTTCCCTA	19512.5
TDG_TG_f1TGA_f2ACGG_rep_8	14443	28033	28033	0	CGCAGCTCTGATACGGCTCGCGGAAGCGAGCCGTGTCAGAGCTGCGACACTCTTTCCCTA	17518.8
TDG_TG_f1TCG_f2CAAG_rep_3	13614	26824	26824	0	CGCAGCTCTCGTCAAGCTCGCGGAAGCGAGCTTGGCGAGAGCTGCGACACTCTTTCCCTA	16964.1
TDG_TG_f1CAC_f2GTAT_rep_4	21513	49550	49550	0	CGCAGCTCCACTGTATCTCGCGGAAGCGAGATACGGTGGAGCTGCGACACTCTTTCCCTA	31191.5
TDG_TG_f1GGG_f2CGGA_rep_9	14464	29121	29121	0	CGCAGCTCGGGTCGGACTCGCGGAAGCGAGTCCGGCCCGAGCTGCGACACTCTTTCCCTA	18376.4
TDG_TG_f1TCA_f2ATTC_rep_1	14488	28160	28160	0	CGCAGCTCTCATATTCCTCGCGGAAGCGAGGAATGTGAGAGCTGCGACACTCTTTCCCTA	17843.6
TDG_TG_f1CAT_f2ACTT_rep_8	14578	28283	28283	0	CGCAGCTCCATTACTTCTCGCGGAAGCGAGAAGTGATGGAGCTGCGACACTCTTTCCCTA	17921.5
TDG_TG_f1GGG_f2AAAT_rep_1	13546	26935	26935	0	CGCAGCTCGGGTAAATCTCGCGGAAGCGAGATTTGCCCGAGCTGCGACACTCTTTCCCTA	17311.3
TDG_TG_f1GGC_f2ATAG_rep_5	14464	26219	26219	0	CGCAGCTCGGCTATAGCTCGCGGAAGCGAGCTATGGCCGAGCTGCGACACTCTTTCCCTA	16936.9
TDG_TG_f1AGA_f2CCCA_rep_9	11631	23245	23245	0	CGCAGCTCAGATCCCACTCGCGGAAGCGAGTGGGGTCTGAGCTGCGACACTCTTTCCCTA	15063.9
TDG_TG_f1TAA_f2GGAT_rep_4	17613	37865	37865	0	CGCAGCTCTAATGGATCTCGCGGAAGCGAGATCCGTTAGAGCTGCGACACTCTTTCCCTA	24795.5
TDG_TG_f1TAC_f2GATG_rep_5	21353	43094	43094	0	CGCAGCTCTACTGATGCTCGCGGAAGCGAGCATCGGTAGAGCTGCGACACTCTTTCCCTA	28229.4
TDG_TG_f1TAC_f2CCTA_rep_4	11750	24786	24786	0	CGCAGCTCTACTCCTACTCGCGGAAGCGAGTAGGGGTAGAGCTGCGACACTCTTTCCCTA	16259
TDG_TG_f1ATA_f2TATC_rep_9	11155	24154	24154	0	CGCAGCTCATATTATCCTCGCGGAAGCGAGGATAGTATGAGCTGCGACACTCTTTCCCTA	15792
TDG_TG_f1TAG_f2ACGG_rep_1	14732	29271	29271	0	CGCAGCTCTAGTACGGCTCGCGGAAGCGAGCCGTGCTAGAGCTGCGACACTCTTTCCCTA	18989.3
TDG_TG_f1CCG_f2TACG_rep_9	12877	25956	25956	0	CGCAGCTCCCGTTACGCTCGCGGAAGCGAGCGTAGCGGGAGCTGCGACACTCTTTCCCTA	17002.9
TDG_TG_f1CGG_f2GCAT_rep_9	26636	48507	48507	0	CGCAGCTCCGGTGCATCTCGCGGAAGCGAGATGCGCCGGAGCTGCGACACTCTTTCCCTA	31786.3
TDG_TG_f1GCG_f2ATTC_rep_5	15407	30543	30543	0	CGCAGCTCGCGTATTCCTCGCGGAAGCGAGGAATGCGCGAGCTGCGACACTCTTTCCCTA	20093.3
TDG_TG_f1AAT_f2ACTT_rep_3	13045	28053	28053	0	CGCAGCTCAATTACTTCTCGCGGAAGCGAGAAGTGATTGAGCTGCGACACTCTTTCCCTA	18530.8
TDG_TG_f1TTG_f2ATCT_rep_2	16626	31936	31936	0	CGCAGCTCTTGTATCTCTCGCGGAAGCGAGAGATGCAAGAGCTGCGACACTCTTTCCCTA	21248.6
TDG_TG_f1GGA_f2ACTG_rep_4	15291	31641	31641	0	CGCAGCTCGGATACTGCTCGCGGAAGCGAGCAGTGTCCGAGCTGCGACACTCTTTCCCTA	21460.6
TDG_TG_f1ATA_f2AGGG_rep_7	14288	25780	25780	0	CGCAGCTCATATAGGGCTCGCGGAAGCGAGCCCTGTATGAGCTGCGACACTCTTTCCCTA	17528
TDG_TG_f1CTT_f2CCGT_rep_4	13550	27756	27756	0	CGCAGCTCCTTTCCGTCTCGCGGAAGCGAGACGGGAAGGAGCTGCGACACTCTTTCCCTA	19496.2
TDG_TG_f1TAC_f2TGTT_rep_7	11578	23385	23385	0	CGCAGCTCTACTTGTTCTCGCGGAAGCGAGAACAGGTAGAGCTGCGACACTCTTTCCCTA	16881.9
TDG_TG_f1AAA_f2CGCA_rep_9	12977	25546	25546	0	CGCAGCTCAAATCGCACTCGCGGAAGCGAGTGCGGTTTGAGCTGCGACACTCTTTCCCTA	18523.7
TDG_TG_f1TGG_f2TCTT_rep_7	11020	20846	20846	0	CGCAGCTCTGGTTCTTCTCGCGGAAGCGAGAAGAGCCAGAGCTGCGACACTCTTTCCCTA	16284.6
TDG_TG_f1AAA_f2CATT_rep_4	9060	17823	17823	0	CGCAGCTCAAATCATTCTCGCGGAAGCGAGAATGGTTTGAGCTGCGACACTCTTTCCCTA	14524.5
TDG_TG_f1AGT_f2AGAC_rep_5	12902	23135	23135	0	CGCAGCTCAGTTAGACCTCGCGGAAGCGAGGTCTGACTGAGCTGCGACACTCTTTCCCTA	19307.9
TDG_TG_f1TAT_f2GTAG_rep_10	17400	34615	34615	0	CGCAGCTCTATTGTAGCTCGCGGAAGCGAGCTACGATAGAGCTGCGACACTCTTTCCCTA	29654
TDG_TG_f1AAA_f2AGCG_rep_6	12395	23870	23870	0	CGCAGCTCAAATAGCGCTCGCGGAAGCGAGCGCTGTTTGAGCTGCGACACTCTTTCCCTA	20993.9
TDG_TG_f1TCT_f2ATAT_rep_10	10731	19047	19047	0	CGCAGCTCTCTTATATCTCGCGGAAGCGAGATATGAGAGAGCTGCGACACTCTTTCCCTA	17228.1
TDG_TG_f1GGA_f2ATAT_rep_5	9223	20415	20415	0	CGCAGCTCGGATATATCTCGCGGAAGCGAGATATGTCCGAGCTGCGACACTCTTTCCCTA	18994.6
TDG_TG_f1AAT_f2TTGG_rep_4	8905	15721	15721	0	CGCAGCTCAATTTTGGCTCGCGGAAGCGAGCCAAGATTGAGCTGCGACACTCTTTCCCTA	14918.8
TDG_TG_f1CTC_f2TCCA_rep_8	9089	17480	17480	0	CGCAGCTCCTCTTCCACTCGCGGAAGCGAGTGGAGGAGGAGCTGCGACACTCTTTCCCTA	16833.3
dBr_2165	9548	17150	17150	0	CGCCACTGTGCGCGGGGACGCGGAAGCGTCCCCGCGCACAGTGGCGACACTCTTTCCCTA	16975.2
TDG_TG_f1TTG_f2GATA_rep_5	18212	39715	39715	0	CGCAGCTCTTGTGATACTCGCGGAAGCGAGTATCGCAAGAGCTGCGACACTCTTTCCCTA	40596.3
TDG_TG_f1AGC_f2CGTG_rep_7	7684	15655	15655	0	CGCAGCTCAGCTCGTGCTCGCGGAAGCGAGCACGGGCTGAGCTGCGACACTCTTTCCCTA	16792.7
TDG_TG_f1TCT_f2ATCC_rep_1	9132	17911	17911	0	CGCAGCTCTCTTATCCCTCGCGGAAGCGAGGGATGAGAGAGCTGCGACACTCTTTCCCTA	19475.6
TDG_TG_f1GGA_f2TTGA_rep_9	6863	12121	12121	0	CGCAGCTCGGATTTGACTCGCGGAAGCGAGTCAAGTCCGAGCTGCGACACTCTTTCCCTA	13329.5
TDG_TG_f1AAA_f2TATC_rep_9	5899	11318	11318	0	CGCAGCTCAAATTATCCTCGCGGAAGCGAGGATAGTTTGAGCTGCGACACTCTTTCCCTA	12848.8
TDG_TG_f1CAC_f2ACCA_rep_4	8407	18348	18348	0	CGCAGCTCCACTACCACTCGCGGAAGCGAGTGGTGGTGGAGCTGCGACACTCTTTCCCTA	21123.1
TDG_TG_f1AGA_f2AGAA_rep_3	15111	28266	28266	0	CGCAGCTCAGATAGAACTCGCGGAAGCGAGTTCTGTCTGAGCTGCGACACTCTTTCCCTA	16625.9
TDG_TG_f1AAC_f2TCGT_rep_2	15181	29682	29682	0	CGCAGCTCAACTTCGTCTCGCGGAAGCGAGACGAGGTTGAGCTGCGACACTCTTTCCCTA	17185.8
TDG_TG_f1GAT_f2TTTG_rep_1	15907	30647	30647	0	CGCAGCTCGATTTTTGCTCGCGGAAGCGAGCAAAGATCGAGCTGCGACACTCTTTCCCTA	17728.2
TDG_TG_f1TTC_f2TGCG_rep_6	16776	33920	33920	0	CGCAGCTCTTCTTGCGCTCGCGGAAGCGAGCGCAGGAAGAGCTGCGACACTCTTTCCCTA	19530.4
TDG_TG_f1TGT_f2GCAC_rep_10	28488	51214	56260	0	CGCAGCTCTGTTGCACCTCGCGGAAGCGAGGTGCGACAGAGCTGCGACACTCTTTCCCTA	32040.6
TDG_TG_f1ATA_f2AAAA_rep_4	15070	29902	29902	0	CGCAGCTCATATAAAACTCGCGGAAGCGAGTTTTGTATGAGCTGCGACACTCTTTCCCTA	16869.5
TDG_TG_f1GCG_f2TTCG_rep_10	17987	34429	34429	0	CGCAGCTCGCGTTTCGCTCGCGGAAGCGAGCGAAGCGCGAGCTGCGACACTCTTTCCCTA	19094.5
TDG_TG_f1ACT_f2AAAT_rep_3	17055	33041	33041	0	CGCAGCTCACTTAAATCTCGCGGAAGCGAGATTTGAGTGAGCTGCGACACTCTTTCCCTA	18191.8
TDG_TG_f1TCT_f2ACCC_rep_2	17734	35721	35721	0	CGCAGCTCTCTTACCCCTCGCGGAAGCGAGGGGTGAGAGAGCTGCGACACTCTTTCCCTA	19574.7
TDG_TG_f1AAA_f2CGGA_rep_1	14961	30875	30875	0	CGCAGCTCAAATCGGACTCGCGGAAGCGAGTCCGGTTTGAGCTGCGACACTCTTTCCCTA	16724.5
TDG_TG_f1GGA_f2GGAT_rep_5	23897	46667	46667	0	CGCAGCTCGGATGGATCTCGCGGAAGCGAGATCCGTCCGAGCTGCGACACTCTTTCCCTA	24829.8
TDG_TG_f1TTA_f2GCAC_rep_7	26833	55583	53035	0	CGCAGCTCTTATGCACCTCGCGGAAGCGAGGTGCGTAAGAGCTGCGACACTCTTTCCCTA	28072.5
TDG_TG_f1TAG_f2ACAA_rep_5	17731	32826	32826	0	CGCAGCTCTAGTACAACTCGCGGAAGCGAGTTGTGCTAGAGCTGCGACACTCTTTCCCTA	17217.8
TDG_TG_f1CTC_f2CATC_rep_4	15796	31376	31376	0	CGCAGCTCCTCTCATCCTCGCGGAAGCGAGGATGGGAGGAGCTGCGACACTCTTTCCCTA	16495.4
TDG_TG_f1GTT_f2CATC_rep_1	18686	37183	37183	0	CGCAGCTCGTTTCATCCTCGCGGAAGCGAGGATGGAACGAGCTGCGACACTCTTTCCCTA	19645.6
TDG_TG_f1TCC_f2GCAG_rep_10	28236	47975	47975	0	CGCAGCTCTCCTGCAGCTCGCGGAAGCGAGCTGCGGGAGAGCTGCGACACTCTTTCCCTA	25491.4
TDG_TG_f1CTA_f2CGCT_rep_8	15898	32170	32170	0	CGCAGCTCCTATCGCTCTCGCGGAAGCGAGAGCGGTAGGAGCTGCGACACTCTTTCCCTA	17181.8
TDG_TG_f1ATT_f2CTCT_rep_5	14387	29532	29532	0	CGCAGCTCATTTCTCTCTCGCGGAAGCGAGAGAGGAATGAGCTGCGACACTCTTTCCCTA	15660.7
TDG_TG_f1ATC_f2TCCG_rep_8	17259	33204	33204	0	CGCAGCTCATCTTCCGCTCGCGGAAGCGAGCGGAGGATGAGCTGCGACACTCTTTCCCTA	17709.6
TDG_TG_f1AGA_f2AGTT_rep_3	15396	29299	29299	0	CGCAGCTCAGATAGTTCTCGCGGAAGCGAGAACTGTCTGAGCTGCGACACTCTTTCCCTA	15827.5
TDG_TG_f1TGC_f2AAAA_rep_5	15182	31626	31626	0	CGCAGCTCTGCTAAAACTCGCGGAAGCGAGTTTTGGCAGAGCTGCGACACTCTTTCCCTA	17376.4
dBr_0657	16894	30848	30848	0	CGCAGCGGGTGAATAGGACGCGGAAGCGTCCTATTCACCCGCTGCGACACTCTTTCCCTA	16956.9
TDG_TG_f1GTA_f2AGAG_rep_7	16753	28450	28450	0	CGCAGCTCGTATAGAGCTCGCGGAAGCGAGCTCTGTACGAGCTGCGACACTCTTTCCCTA	15631.4
TDG_TG_f1GGC_f2ACGG_rep_7	18096	34472	34472	0	CGCAGCTCGGCTACGGCTCGCGGAAGCGAGCCGTGGCCGAGCTGCGACACTCTTTCCCTA	19005.5
TDG_TG_f1GTT_f2GGGC_rep_10	22690	44569	44569	0	CGCAGCTCGTTTGGGCCTCGCGGAAGCGAGGCCCGAACGAGCTGCGACACTCTTTCCCTA	25029.4
TDG_TG_f1AAC_f2TATA_rep_2	14396	26333	26333	0	CGCAGCTCAACTTATACTCGCGGAAGCGAGTATAGGTTGAGCTGCGACACTCTTTCCCTA	14951.8
TDG_TG_f1GCA_f2AAGT_rep_10	17289	34417	34417	0	CGCAGCTCGCATAAGTCTCGCGGAAGCGAGACTTGTGCGAGCTGCGACACTCTTTCCCTA	19601.5
TDG_TG_f1CGT_f2TGAT_rep_9	16344	29696	29696	0	CGCAGCTCCGTTTGATCTCGCGGAAGCGAGATCAGACGGAGCTGCGACACTCTTTCCCTA	17004.2
TDG_TG_f1AAT_f2GCTG_rep_8	27938	49078	49078	0	CGCAGCTCAATTGCTGCTCGCGGAAGCGAGCAGCGATTGAGCTGCGACACTCTTTCCCTA	28177.9
TDG_TG_f1TCT_f2AACC_rep_10	17191	33014	33014	0	CGCAGCTCTCTTAACCCTCGCGGAAGCGAGGGTTGAGAGAGCTGCGACACTCTTTCCCTA	19034.6
TDG_TG_f1GTA_f2ACAA_rep_9	16191	33349	33349	0	CGCAGCTCGTATACAACTCGCGGAAGCGAGTTGTGTACGAGCTGCGACACTCTTTCCCTA	19222.8
dBr_7114	14756	29078	29078	0	CGCGATTAGATACATTGGCGCGGAAGCGCCAATGTATCTAATCGCGACACTCTTTCCCTA	16995.2
TDG_TG_f1GAC_f2CCAG_rep_1	14258	28386	28386	0	CGCAGCTCGACTCCAGCTCGCGGAAGCGAGCTGGGGTCGAGCTGCGACACTCTTTCCCTA	16656.1
TDG_TG_f1TAT_f2TTAT_rep_10	12135	25379	25379	0	CGCAGCTCTATTTTATCTCGCGGAAGCGAGATAAGATAGAGCTGCGACACTCTTTCCCTA	14834.8
TDG_TG_f1AGG_f2CGTT_rep_3	16528	29480	29480	0	CGCAGCTCAGGTCGTTCTCGCGGAAGCGAGAACGGCCTGAGCTGCGACACTCTTTCCCTA	17299.8
TDG_TG_f1TAG_f2GCCA_rep_6	30559	58408	60296	0	CGCAGCTCTAGTGCCACTCGCGGAAGCGAGTGGCGCTAGAGCTGCGACACTCTTTCCCTA	35553
TDG_TG_f1AGG_f2TTGA_rep_9	11952	22845	22845	0	CGCAGCTCAGGTTTGACTCGCGGAAGCGAGTCAAGCCTGAGCTGCGACACTCTTTCCCTA	13594.4
TDG_TG_f1AAG_f2GAGA_rep_9	28010	46201	46201	0	CGCAGCTCAAGTGAGACTCGCGGAAGCGAGTCTCGCTTGAGCTGCGACACTCTTTCCCTA	27691.6
TDG_TG_f1TAG_f2TGAC_rep_1	12371	28233	28233	0	CGCAGCTCTAGTTGACCTCGCGGAAGCGAGGTCAGCTAGAGCTGCGACACTCTTTCCCTA	17141.5
TDG_TG_f1ACA_f2CGTT_rep_3	13904	25382	25382	0	CGCAGCTCACATCGTTCTCGCGGAAGCGAGAACGGTGTGAGCTGCGACACTCTTTCCCTA	15463.3
TDG_TG_f1CCT_f2ACGT_rep_2	17759	30659	30659	0	CGCAGCTCCCTTACGTCTCGCGGAAGCGAGACGTGAGGGAGCTGCGACACTCTTTCCCTA	18614.4
TDG_TG_f1CGA_f2ATGA_rep_7	13931	32291	32291	0	CGCAGCTCCGATATGACTCGCGGAAGCGAGTCATGTCGGAGCTGCGACACTCTTTCCCTA	19621.8
TDG_TG_f1TTA_f2CGTG_rep_7	14203	25411	25411	0	CGCAGCTCTTATCGTGCTCGCGGAAGCGAGCACGGTAAGAGCTGCGACACTCTTTCCCTA	15639.6
TDG_TG_f1GGC_f2CAAA_rep_7	14380	23091	23091	0	CGCAGCTCGGCTCAAACTCGCGGAAGCGAGTTTGGGCCGAGCTGCGACACTCTTTCCCTA	14327.1
TDG_TG_f1TCA_f2AAGA_rep_9	11696	26322	26322	0	CGCAGCTCTCATAAGACTCGCGGAAGCGAGTCTTGTGAGAGCTGCGACACTCTTTCCCTA	16343.2
TDG_TG_f1CCG_f2AGGA_rep_2	16077	27464	27464	0	CGCAGCTCCCGTAGGACTCGCGGAAGCGAGTCCTGCGGGAGCTGCGACACTCTTTCCCTA	17256.5
TDG_TG_f1CTC_f2AAGC_rep_8	14069	26653	26653	0	CGCAGCTCCTCTAAGCCTCGCGGAAGCGAGGCTTGGAGGAGCTGCGACACTCTTTCCCTA	16976.6
TDG_TG_f1AGG_f2GTTC_rep_6	24773	55573	49020	0	CGCAGCTCAGGTGTTCCTCGCGGAAGCGAGGAACGCCTGAGCTGCGACACTCTTTCCCTA	31359.6
TDG_TG_f1TCG_f2GGGC_rep_5	20550	35481	35481	0	CGCAGCTCTCGTGGGCCTCGCGGAAGCGAGGCCCGCGAGAGCTGCGACACTCTTTCCCTA	22700
TDG_TG_f1AAG_f2GAGA_rep_10	26637	43598	43598	0	CGCAGCTCAAGTGAGACTCGCGGAAGCGAGTCTCGCTTGAGCTGCGACACTCTTTCCCTA	27717.3
TDG_TG_f1ACT_f2CCAA_rep_5	12892	26565	26565	0	CGCAGCTCACTTCCAACTCGCGGAAGCGAGTTGGGAGTGAGCTGCGACACTCTTTCCCTA	16738.7
TDG_TG_f1TCT_f2GTCA_rep_3	24918	45674	45674	0	CGCAGCTCTCTTGTCACTCGCGGAAGCGAGTGACGAGAGAGCTGCGACACTCTTTCCCTA	28676.2
TDG_TG_f1TTG_f2ACGT_rep_4	16610	25975	25975	0	CGCAGCTCTTGTACGTCTCGCGGAAGCGAGACGTGCAAGAGCTGCGACACTCTTTCCCTA	16002.1
TDG_TG_f1ATT_f2TTGT_rep_4	10739	21982	21982	0	CGCAGCTCATTTTTGTCTCGCGGAAGCGAGACAAGAATGAGCTGCGACACTCTTTCCCTA	13428.7
TDG_TG_f1AAC_f2ATAC_rep_4	17575	31242	31242	0	CGCAGCTCAACTATACCTCGCGGAAGCGAGGTATGGTTGAGCTGCGACACTCTTTCCCTA	19160.7
TDG_TG_f1GCA_f2TTCA_rep_8	14548	27441	27441	0	CGCAGCTCGCATTTCACTCGCGGAAGCGAGTGAAGTGCGAGCTGCGACACTCTTTCCCTA	16819.3
TDG_TG_f1GTT_f2CTCC_rep_8	15576	32701	32701	0	CGCAGCTCGTTTCTCCCTCGCGGAAGCGAGGGAGGAACGAGCTGCGACACTCTTTCCCTA	19964
TDG_TG_f1TCG_f2GGTT_rep_10	23259	40713	40713	0	CGCAGCTCTCGTGGTTCTCGCGGAAGCGAGAACCGCGAGAGCTGCGACACTCTTTCCCTA	24855.4
TDG_TG_f1CAG_f2TTAT_rep_2	15261	24761	24761	0	CGCAGCTCCAGTTTATCTCGCGGAAGCGAGATAAGCTGGAGCTGCGACACTCTTTCCCTA	15076
TDG_TG_f1GCG_f2GGAA_rep_8	22301	50055	44203	0	CGCAGCTCGCGTGGAACTCGCGGAAGCGAGTTCCGCGCGAGCTGCGACACTCTTTCCCTA	26844.3
TDG_TG_f1GGT_f2CTAG_rep_2	15726	27255	27255	0	CGCAGCTCGGTTCTAGCTCGCGGAAGCGAGCTAGGACCGAGCTGCGACACTCTTTCCCTA	16301.1
TDG_TG_f1ACC_f2CAGG_rep_7	14748	24887	24887	0	CGCAGCTCACCTCAGGCTCGCGGAAGCGAGCCTGGGGTGAGCTGCGACACTCTTTCCCTA	14579.8
TDG_TG_f1ATT_f2AATT_rep_9	14947	28457	28457	0	CGCAGCTCATTTAATTCTCGCGGAAGCGAGAATTGAATGAGCTGCGACACTCTTTCCCTA	16671.3
TDG_TG_f1AAA_f2GTAT_rep_6	22418	36809	36809	0	CGCAGCTCAAATGTATCTCGCGGAAGCGAGATACGTTTGAGCTGCGACACTCTTTCCCTA	21555.3
dBr_7337	15646	26233	26233	0	CGCCATAGTAAGCCACAGCGCGGAAGCGCTGTGGCTTACTATGGCGACACTCTTTCCCTA	15268.9
TDG_TG_f1CGT_f2TCAC_rep_4	14287	31840	31840	0	CGCAGCTCCGTTTCACCTCGCGGAAGCGAGGTGAGACGGAGCTGCGACACTCTTTCCCTA	18621.7
TDG_TG_f1ATA_f2CACA_rep_8	13970	25504	25504	0	CGCAGCTCATATCACACTCGCGGAAGCGAGTGTGGTATGAGCTGCGACACTCTTTCCCTA	14935.1
TDG_TG_f1TTA_f2ACAA_rep_8	16426	29390	29390	0	CGCAGCTCTTATACAACTCGCGGAAGCGAGTTGTGTAAGAGCTGCGACACTCTTTCCCTA	17406.9
TDG_TG_f1TAC_f2ATCC_rep_7	21304	42681	42681	0	CGCAGCTCTACTATCCCTCGCGGAAGCGAGGGATGGTAGAGCTGCGACACTCTTTCCCTA	25108.1
TDG_TG_f1GCA_f2TTTC_rep_1	14950	27176	27176	0	CGCAGCTCGCATTTTCCTCGCGGAAGCGAGGAAAGTGCGAGCTGCGACACTCTTTCCCTA	15817.8
TDG_TG_f1CTG_f2CCAA_rep_9	14367	24558	24558	0	CGCAGCTCCTGTCCAACTCGCGGAAGCGAGTTGGGCAGGAGCTGCGACACTCTTTCCCTA	14293.7
TDG_TG_f1CGT_f2TGCA_rep_4	16571	35658	35658	0	CGCAGCTCCGTTTGCACTCGCGGAAGCGAGTGCAGACGGAGCTGCGACACTCTTTCCCTA	20889.9
TDG_TG_f1TAT_f2GGCT_rep_4	23786	47660	47660	0	CGCAGCTCTATTGGCTCTCGCGGAAGCGAGAGCCGATAGAGCTGCGACACTCTTTCCCTA	27682.6
TDG_TG_f1AAT_f2GGAC_rep_10	26222	49411	49411	0	CGCAGCTCAATTGGACCTCGCGGAAGCGAGGTCCGATTGAGCTGCGACACTCTTTCCCTA	28527.1
TDG_TG_f1CAG_f2GTCT_rep_9	34180	63294	67353	0	CGCAGCTCCAGTGTCTCTCGCGGAAGCGAGAGACGCTGGAGCTGCGACACTCTTTCCCTA	38754.2
TDG_TG_f1GAC_f2AAGA_rep_8	15069	30827	30827	0	CGCAGCTCGACTAAGACTCGCGGAAGCGAGTCTTGGTCGAGCTGCGACACTCTTTCCCTA	17681.9
TDG_TG_f1AAA_f2AACA_rep_6	16373	29950	29950	0	CGCAGCTCAAATAACACTCGCGGAAGCGAGTGTTGTTTGAGCTGCGACACTCTTTCCCTA	17127.4
TDG_TG_f1ATC_f2CGGG_rep_5	13822	27824	27824	0	CGCAGCTCATCTCGGGCTCGCGGAAGCGAGCCCGGGATGAGCTGCGACACTCTTTCCCTA	15687.8
TDG_TG_f1ACG_f2TCTG_rep_9	14183	28490	28490	0	CGCAGCTCACGTTCTGCTCGCGGAAGCGAGCAGAGCGTGAGCTGCGACACTCTTTCCCTA	15803
TDG_TG_f1CTC_f2GCAT_rep_4	28392	59182	56073	0	CGCAGCTCCTCTGCATCTCGCGGAAGCGAGATGCGGAGGAGCTGCGACACTCTTTCCCTA	30956
TDG_TG_f1AAA_f2TGGT_rep_10	11979	29720	29720	0	CGCAGCTCAAATTGGTCTCGCGGAAGCGAGACCAGTTTGAGCTGCGACACTCTTTCCCTA	16187.4
TDG_TG_f1TTA_f2TTTC_rep_10	12902	24798	24798	0	CGCAGCTCTTATTTTCCTCGCGGAAGCGAGGAAAGTAAGAGCTGCGACACTCTTTCCCTA	13086.1
TDG_TG_f1CGC_f2CGAA_rep_5	18133	31122	31122	0	CGCAGCTCCGCTCGAACTCGCGGAAGCGAGTTCGGGCGGAGCTGCGACACTCTTTCCCTA	16194.1
TDG_TG_f1GTG_f2CGTT_rep_6	16099	33610	33610	0	CGCAGCTCGTGTCGTTCTCGCGGAAGCGAGAACGGCACGAGCTGCGACACTCTTTCCCTA	17488.7
TDG_TG_f1ACA_f2CGCC_rep_2	18017	32792	32792	0	CGCAGCTCACATCGCCCTCGCGGAAGCGAGGGCGGTGTGAGCTGCGACACTCTTTCCCTA	17075.6
TDG_TG_f1CGC_f2CGTG_rep_1	17478	37812	37812	0	CGCAGCTCCGCTCGTGCTCGCGGAAGCGAGCACGGGCGGAGCTGCGACACTCTTTCCCTA	19706
TDG_TG_f1AAG_f2ACGT_rep_3	19079	36193	36193	0	CGCAGCTCAAGTACGTCTCGCGGAAGCGAGACGTGCTTGAGCTGCGACACTCTTTCCCTA	18860.5
TDG_TG_f1CCT_f2CAAC_rep_5	17208	33907	33907	0	CGCAGCTCCCTTCAACCTCGCGGAAGCGAGGTTGGAGGGAGCTGCGACACTCTTTCCCTA	17733.1
TDG_TG_f1CTA_f2TCCC_rep_7	16400	30119	30119	0	CGCAGCTCCTATTCCCCTCGCGGAAGCGAGGGGAGTAGGAGCTGCGACACTCTTTCCCTA	15732.4
TDG_TG_f1CTG_f2GCGG_rep_2	29396	61586	58030	0	CGCAGCTCCTGTGCGGCTCGCGGAAGCGAGCCGCGCAGGAGCTGCGACACTCTTTCCCTA	30269.6
TDG_TG_f1TTA_f2GAGT_rep_9	20967	42773	42773	0	CGCAGCTCTTATGAGTCTCGCGGAAGCGAGACTCGTAAGAGCTGCGACACTCTTTCCCTA	22397.9
TDG_TG_random_2TG_2_rep_7	15652	32681	32681	0	CGCTACGACTCACTTTGACGCGGAAGCGTCAGAGTGGGTCGTAGCGACACTCTTTCCCTA	17295.5
TDG_TG_f1GGG_f2TGTC_rep_4	15896	30077	30077	0	CGCAGCTCGGGTTGTCCTCGCGGAAGCGAGGACAGCCCGAGCTGCGACACTCTTTCCCTA	15883
TDG_TG_f1TAA_f2AAGG_rep_5	13785	29229	29229	0	CGCAGCTCTAATAAGGCTCGCGGAAGCGAGCCTTGTTAGAGCTGCGACACTCTTTCCCTA	15712.7
TDG_TG_f1ATC_f2GAGA_rep_6	22729	45437	45437	0	CGCAGCTCATCTGAGACTCGCGGAAGCGAGTCTCGGATGAGCTGCGACACTCTTTCCCTA	24725.6
TDG_TG_f1GAC_f2CTAG_rep_8	15132	30667	30667	0	CGCAGCTCGACTCTAGCTCGCGGAAGCGAGCTAGGGTCGAGCTGCGACACTCTTTCCCTA	16932.4
TDG_TG_f1CAT_f2GAGC_rep_6	20216	45815	45815	0	CGCAGCTCCATTGAGCCTCGCGGAAGCGAGGCTCGATGGAGCTGCGACACTCTTTCCCTA	25372
TDG_TG_f1GGC_f2ACGA_rep_3	16760	31665	31665	0	CGCAGCTCGGCTACGACTCGCGGAAGCGAGTCGTGGCCGAGCTGCGACACTCTTTCCCTA	17607.6
TDG_TG_f1AAG_f2TTAA_rep_1	12443	26829	26829	0	CGCAGCTCAAGTTTAACTCGCGGAAGCGAGTTAAGCTTGAGCTGCGACACTCTTTCCCTA	15143.9
TDG_TG_f1GCG_f2GTAG_rep_7	23404	44654	44654	0	CGCAGCTCGCGTGTAGCTCGCGGAAGCGAGCTACGCGCGAGCTGCGACACTCTTTCCCTA	25400.2
TDG_TG_f1TAT_f2GCAC_rep_1	24807	47751	47751	0	CGCAGCTCTATTGCACCTCGCGGAAGCGAGGTGCGATAGAGCTGCGACACTCTTTCCCTA	27083
TDG_TG_f1CAC_f2CATC_rep_2	14459	27568	27568	0	CGCAGCTCCACTCATCCTCGCGGAAGCGAGGATGGGTGGAGCTGCGACACTCTTTCCCTA	15688.1
TDG_TG_f1GCG_f2CTCG_rep_9	15947	30525	30525	0	CGCAGCTCGCGTCTCGCTCGCGGAAGCGAGCGAGGCGCGAGCTGCGACACTCTTTCCCTA	17487.4
dBr_2807	15084	27209	27209	0	CGCAACTTAGATCTGGCTCGCGGAAGCGAGCCAGATCTAAGTTGCGACACTCTTTCCCTA	15650.5
TDG_TG_f1TGA_f2TAGA_rep_4	11181	22428	22428	0	CGCAGCTCTGATTAGACTCGCGGAAGCGAGTCTAGTCAGAGCTGCGACACTCTTTCCCTA	12914.4
dBr_0464	16543	33385	33385	0	CGCACCCAAAGGAAGGTGCGCGGAAGCGCACCTTCCTTTGGGTGCGACACTCTTTCCCTA	19141.7
TDG_TG_f1TCG_f2AAGC_rep_1	15813	31366	31366	0	CGCAGCTCTCGTAAGCCTCGCGGAAGCGAGGCTTGCGAGAGCTGCGACACTCTTTCCCTA	17984
TDG_TG_f1AGT_f2CCGG_rep_10	14607	28051	28051	0	CGCAGCTCAGTTCCGGCTCGCGGAAGCGAGCCGGGACTGAGCTGCGACACTCTTTCCCTA	16152.3
TDG_TG_f1GAC_f2CTCT_rep_4	15437	28544	28544	0	CGCAGCTCGACTCTCTCTCGCGGAAGCGAGAGAGGGTCGAGCTGCGACACTCTTTCCCTA	16436.2
TDG_TG_f1GGT_f2TGAG_rep_2	14835	28014	28014	0	CGCAGCTCGGTTTGAGCTCGCGGAAGCGAGCTCAGACCGAGCTGCGACACTCTTTCCCTA	16235.5
TDG_TG_f1GGC_f2GCAT_rep_3	23760	49247	49247	0	CGCAGCTCGGCTGCATCTCGCGGAAGCGAGATGCGGCCGAGCTGCGACACTCTTTCCCTA	28541
TDG_TG_f1AGT_f2ACGC_rep_6	18001	33681	33681	0	CGCAGCTCAGTTACGCCTCGCGGAAGCGAGGCGTGACTGAGCTGCGACACTCTTTCCCTA	19626.2
TDG_TG_f1TGC_f2GTCC_rep_2	25872	48498	48498	0	CGCAGCTCTGCTGTCCCTCGCGGAAGCGAGGGACGGCAGAGCTGCGACACTCTTTCCCTA	27864.7
TDG_TG_f1TGA_f2GTCA_rep_4	23766	44045	44045	0	CGCAGCTCTGATGTCACTCGCGGAAGCGAGTGACGTCAGAGCTGCGACACTCTTTCCCTA	24933.7
TDG_TG_f1CAA_f2GGTT_rep_4	22823	45797	45797	0	CGCAGCTCCAATGGTTCTCGCGGAAGCGAGAACCGTTGGAGCTGCGACACTCTTTCCCTA	25643.6
TDG_TG_f1GAA_f2ATTA_rep_6	14297	28086	28086	0	CGCAGCTCGAATATTACTCGCGGAAGCGAGTAATGTTCGAGCTGCGACACTCTTTCCCTA	15873.4
TDG_TG_f1TGA_f2TTTA_rep_8	12219	22194	22194	0	CGCAGCTCTGATTTTACTCGCGGAAGCGAGTAAAGTCAGAGCTGCGACACTCTTTCCCTA	12543.4
TDG_TG_f1AAG_f2TCCC_rep_5	15394	30436	30436	0	CGCAGCTCAAGTTCCCCTCGCGGAAGCGAGGGGAGCTTGAGCTGCGACACTCTTTCCCTA	17097.3
TDG_TG_f1ACT_f2TTCT_rep_10	14492	29766	29766	0	CGCAGCTCACTTTTCTCTCGCGGAAGCGAGAGAAGAGTGAGCTGCGACACTCTTTCCCTA	16720.9
TDG_TG_f1ACT_f2TGGA_rep_3	13618	28369	28369	0	CGCAGCTCACTTTGGACTCGCGGAAGCGAGTCCAGAGTGAGCTGCGACACTCTTTCCCTA	15936.1
TDG_TG_f1GCA_f2AGGG_rep_6	17335	32222	32222	0	CGCAGCTCGCATAGGGCTCGCGGAAGCGAGCCCTGTGCGAGCTGCGACACTCTTTCCCTA	18159.1
TDG_TG_f1GCA_f2CTGA_rep_8	13873	28023	28023	0	CGCAGCTCGCATCTGACTCGCGGAAGCGAGTCAGGTGCGAGCTGCGACACTCTTTCCCTA	15932.7
TDG_TG_f1TAG_f2TGTT_rep_4	12493	23437	23437	0	CGCAGCTCTAGTTGTTCTCGCGGAAGCGAGAACAGCTAGAGCTGCGACACTCTTTCCCTA	13319.5
TDG_TG_f1TCT_f2GTCT_rep_5	21705	43860	43860	0	CGCAGCTCTCTTGTCTCTCGCGGAAGCGAGAGACGAGAGAGCTGCGACACTCTTTCCCTA	24838.9
TDG_TG_f1CCG_f2AGAC_rep_6	17837	36629	36629	0	CGCAGCTCCCGTAGACCTCGCGGAAGCGAGGTCTGCGGGAGCTGCGACACTCTTTCCCTA	20722.7
TDG_TG_f1TAT_f2CCCC_rep_6	13427	27302	27302	0	CGCAGCTCTATTCCCCCTCGCGGAAGCGAGGGGGGATAGAGCTGCGACACTCTTTCCCTA	15257.1
TDG_TG_f1TGG_f2AAAG_rep_5	15549	30580	30580	0	CGCAGCTCTGGTAAAGCTCGCGGAAGCGAGCTTTGCCAGAGCTGCGACACTCTTTCCCTA	17052.8
TDG_TG_f1CTA_f2TATT_rep_8	11595	23586	23586	0	CGCAGCTCCTATTATTCTCGCGGAAGCGAGAATAGTAGGAGCTGCGACACTCTTTCCCTA	13523.1
TDG_TG_f1GGT_f2TATC_rep_5	11869	25117	25117	0	CGCAGCTCGGTTTATCCTCGCGGAAGCGAGGATAGACCGAGCTGCGACACTCTTTCCCTA	14876.6
TDG_TG_f1ACA_f2TATA_rep_2	10694	23053	23053	0	CGCAGCTCACATTATACTCGCGGAAGCGAGTATAGTGTGAGCTGCGACACTCTTTCCCTA	13663.2
dBr_0838	13105	25397	25397	0	CGCGGGAATCAGTATAGACGCGGAAGCGTCTATACTGATTCCCGCGACACTCTTTCCCTA	15078.2
TDG_TG_f1GTA_f2GGAT_rep_10	23210	44772	44772	0	CGCAGCTCGTATGGATCTCGCGGAAGCGAGATCCGTACGAGCTGCGACACTCTTTCCCTA	26979.2
TDG_TG_random_4TG_6_rep_6	12241	22780	22780	0	CGCTAATTTTCCGCTGTTCGCGGAAGCGAACAGCGGGGGATTGGCGACACTCTTTCCCTA	14149.7
TDG_TG_f1CCT_f2GGAT_rep_6	20986	43922	43922	0	CGCAGCTCCCTTGGATCTCGCGGAAGCGAGATCCGAGGGAGCTGCGACACTCTTTCCCTA	27662
TDG_TG_f1GGC_f2CCCA_rep_3	10997	21962	21962	0	CGCAGCTCGGCTCCCACTCGCGGAAGCGAGTGGGGGCCGAGCTGCGACACTCTTTCCCTA	14254.7
TDG_TG_f1GAG_f2TGCG_rep_5	12228	23600	23600	0	CGCAGCTCGAGTTGCGCTCGCGGAAGCGAGCGCAGCTCGAGCTGCGACACTCTTTCCCTA	15792.8
TDG_TG_f1ATT_f2CCAT_rep_4	11751	22798	22798	0	CGCAGCTCATTTCCATCTCGCGGAAGCGAGATGGGAATGAGCTGCGACACTCTTTCCCTA	15333.1
TDG_TG_f1TCA_f2CACT_rep_10	10041	20145	20145	0	CGCAGCTCTCATCACTCTCGCGGAAGCGAGAGTGGTGAGAGCTGCGACACTCTTTCCCTA	13779.7
TDG_TG_f1ATT_f2AGGT_rep_6	13403	24895	24895	0	CGCAGCTCATTTAGGTCTCGCGGAAGCGAGACCTGAATGAGCTGCGACACTCTTTCCCTA	17494.9
dBr_4292	10811	23398	23398	0	CGCATTCGGACATCTAGTCGCGGAAGCGACTAGATGTCCGAATGCGACACTCTTTCCCTA	16845.1
TDG_TG_f1ATG_f2TAAC_rep_10	8887	19036	19036	0	CGCAGCTCATGTTAACCTCGCGGAAGCGAGGTTAGCATGAGCTGCGACACTCTTTCCCTA	13953.8
TDG_TG_f1TGT_f2TTTC_rep_10	9040	16799	16799	0	CGCAGCTCTGTTTTTCCTCGCGGAAGCGAGGAAAGACAGAGCTGCGACACTCTTTCCCTA	12522.5
TDG_TG_f1GTT_f2CCGT_rep_4	10673	22559	22559	0	CGCAGCTCGTTTCCGTCTCGCGGAAGCGAGACGGGAACGAGCTGCGACACTCTTTCCCTA	17155.2
TDG_TG_f1TCG_f2CGAG_rep_5	9698	17577	17577	0	CGCAGCTCTCGTCGAGCTCGCGGAAGCGAGCTCGGCGAGAGCTGCGACACTCTTTCCCTA	13475.7
TDG_TG_f1CGG_f2GAAG_rep_10	21951	43661	43661	0	CGCAGCTCCGGTGAAGCTCGCGGAAGCGAGCTTCGCCGGAGCTGCGACACTCTTTCCCTA	33829
TDG_TG_f1CCG_f2GACT_rep_6	15635	31713	31713	0	CGCAGCTCCCGTGACTCTCGCGGAAGCGAGAGTCGCGGGAGCTGCGACACTCTTTCCCTA	25065.1
TDG_TG_f1AGC_f2ATTT_rep_7	8588	17339	17339	0	CGCAGCTCAGCTATTTCTCGCGGAAGCGAGAAATGGCTGAGCTGCGACACTCTTTCCCTA	13983.9
TDG_TG_f1ACG_f2CCTG_rep_4	8899	16633	16633	0	CGCAGCTCACGTCCTGCTCGCGGAAGCGAGCAGGGCGTGAGCTGCGACACTCTTTCCCTA	13740.5
TDG_TG_f1ATT_f2GATG_rep_9	16256	34618	34618	0	CGCAGCTCATTTGATGCTCGCGGAAGCGAGCATCGAATGAGCTGCGACACTCTTTCCCTA	29673.1
TDG_TG_f1CAG_f2GAGC_rep_3	19402	42560	42560	0	CGCAGCTCCAGTGAGCCTCGCGGAAGCGAGGCTCGCTGGAGCTGCGACACTCTTTCCCTA	36861.7
TDG_TG_f1ATG_f2CGTG_rep_5	10235	21183	21183	0	CGCAGCTCATGTCGTGCTCGCGGAAGCGAGCACGGCATGAGCTGCGACACTCTTTCCCTA	18534.8
TDG_TG_f1ATG_f2GGAT_rep_9	20972	45077	45077	0	CGCAGCTCATGTGGATCTCGCGGAAGCGAGATCCGCATGAGCTGCGACACTCTTTCCCTA	39571
TDG_TG_f1GCT_f2ACGC_rep_3	9893	20940	20940	0	CGCAGCTCGCTTACGCCTCGCGGAAGCGAGGCGTGAGCGAGCTGCGACACTCTTTCCCTA	18642.2
TDG_TG_f1GCC_f2CAAG_rep_3	8707	16957	16957	0	CGCAGCTCGCCTCAAGCTCGCGGAAGCGAGCTTGGGGCGAGCTGCGACACTCTTTCCCTA	15194.2
TDG_TG_f1CCA_f2ATGC_rep_7	10166	22678	22678	0	CGCAGCTCCCATATGCCTCGCGGAAGCGAGGCATGTGGGAGCTGCGACACTCTTTCCCTA	20541.3
TDG_TG_f1GTA_f2CGGC_rep_6	8134	16203	16203	0	CGCAGCTCGTATCGGCCTCGCGGAAGCGAGGCCGGTACGAGCTGCGACACTCTTTCCCTA	15075.7
TDG_TG_f1GGC_f2ATGG_rep_3	9949	17076	17076	0	CGCAGCTCGGCTATGGCTCGCGGAAGCGAGCCATGGCCGAGCTGCGACACTCTTTCCCTA	15952.6
TDG_TG_f1CCC_f2CCAC_rep_2	7667	15771	15771	0	CGCAGCTCCCCTCCACCTCGCGGAAGCGAGGTGGGGGGGAGCTGCGACACTCTTTCCCTA	14786.2
TDG_TG_f1ATA_f2CTCT_rep_8	7195	14378	14378	0	CGCAGCTCATATCTCTCTCGCGGAAGCGAGAGAGGTATGAGCTGCGACACTCTTTCCCTA	13552.4
TDG_TG_f1TCT_f2GTCC_rep_7	15933	32093	32093	0	CGCAGCTCTCTTGTCCCTCGCGGAAGCGAGGGACGAGAGAGCTGCGACACTCTTTCCCTA	30807.9
TDG_TG_f1CTC_f2CATG_rep_7	7523	16558	16558	0	CGCAGCTCCTCTCATGCTCGCGGAAGCGAGCATGGGAGGAGCTGCGACACTCTTTCCCTA	16053.6
TDG_TG_f1TAC_f2CGAG_rep_9	6962	12643	12643	0	CGCAGCTCTACTCGAGCTCGCGGAAGCGAGCTCGGGTAGAGCTGCGACACTCTTTCCCTA	12303.5
TDG_TG_f1ATA_f2TGCC_rep_6	8159	15382	15382	0	CGCAGCTCATATTGCCCTCGCGGAAGCGAGGGCAGTATGAGCTGCGACACTCTTTCCCTA	14960
TDG_TG_f1TGA_f2GCCT_rep_2	11051	24915	24915	0	CGCAGCTCTGATGCCTCTCGCGGAAGCGAGAGGCGTCAGAGCTGCGACACTCTTTCCCTA	24108
TDG_TG_f1GCA_f2CTTG_rep_5	8353	16120	16120	0	CGCAGCTCGCATCTTGCTCGCGGAAGCGAGCAAGGTGCGAGCTGCGACACTCTTTCCCTA	15223.4
TDG_TG_f1AAT_f2CTCA_rep_8	8901	17208	17208	0	CGCAGCTCAATTCTCACTCGCGGAAGCGAGTGAGGATTGAGCTGCGACACTCTTTCCCTA	16262.7
TDG_TG_f1AGA_f2CTTA_rep_4	7150	12367	12367	0	CGCAGCTCAGATCTTACTCGCGGAAGCGAGTAAGGTCTGAGCTGCGACACTCTTTCCCTA	11787.2
TDG_TG_f1CGG_f2AGCC_rep_5	14493	27030	27030	0	CGCAGCTCCGGTAGCCCTCGCGGAAGCGAGGGCTGCCGGAGCTGCGACACTCTTTCCCTA	25812.1
TDG_TG_f1AGT_f2ATCG_rep_6	11334	23332	23332	0	CGCAGCTCAGTTATCGCTCGCGGAAGCGAGCGATGACTGAGCTGCGACACTCTTTCCCTA	22034.3
TDG_TG_f1GCA_f2GCGT_rep_10	15261	29780	29780	0	CGCAGCTCGCATGCGTCTCGCGGAAGCGAGACGCGTGCGAGCTGCGACACTCTTTCCCTA	27756.7
TDG_TG_f1TCC_f2GCGA_rep_2	13789	30090	30090	0	CGCAGCTCTCCTGCGACTCGCGGAAGCGAGTCGCGGGAGAGCTGCGACACTCTTTCCCTA	28037.9
TDG_TG_f1CGC_f2ACGA_rep_10	8942	21930	21930	0	CGCAGCTCCGCTACGACTCGCGGAAGCGAGTCGTGGCGGAGCTGCGACACTCTTTCCCTA	20431.1
TDG_TG_f1TTA_f2AGTT_rep_9	9808	18331	18331	0	CGCAGCTCTTATAGTTCTCGCGGAAGCGAGAACTGTAAGAGCTGCGACACTCTTTCCCTA	17072
TDG_TG_f1GAG_f2CCTC_rep_5	8869	19363	19363	0	CGCAGCTCGAGTCCTCCTCGCGGAAGCGAGGAGGGCTCGAGCTGCGACACTCTTTCCCTA	17875.4
TDG_TG_f1CAG_f2CATG_rep_5	8729	20499	20499	0	CGCAGCTCCAGTCATGCTCGCGGAAGCGAGCATGGCTGGAGCTGCGACACTCTTTCCCTA	18617.2
TDG_TG_f1TTC_f2TGAG_rep_4	7387	14643	14643	0	CGCAGCTCTTCTTGAGCTCGCGGAAGCGAGCTCAGGAAGAGCTGCGACACTCTTTCCCTA	13141.9
TDG_TG_f1AGG_f2TGCC_rep_6	9270	19401	19401	0	CGCAGCTCAGGTTGCCCTCGCGGAAGCGAGGGCAGCCTGAGCTGCGACACTCTTTCCCTA	17263.1
TDG_TG_f1ACT_f2GTTG_rep_3	15801	33075	33075	0	CGCAGCTCACTTGTTGCTCGCGGAAGCGAGCAACGAGTGAGCTGCGACACTCTTTCCCTA	29516.7
TDG_TG_f1GTG_f2TTCA_rep_5	8819	16179	16179	0	CGCAGCTCGTGTTTCACTCGCGGAAGCGAGTGAAGCACGAGCTGCGACACTCTTTCCCTA	14375
TDG_TG_f1AAT_f2CGAG_rep_4	8236	18122	18122	0	CGCAGCTCAATTCGAGCTCGCGGAAGCGAGCTCGGATTGAGCTGCGACACTCTTTCCCTA	15951.7
TDG_TG_f1ATA_f2CAGA_rep_1	7441	14927	14927	0	CGCAGCTCATATCAGACTCGCGGAAGCGAGTCTGGTATGAGCTGCGACACTCTTTCCCTA	13007
TDG_TG_f1TTA_f2ACAA_rep_4	9670	19215	19215	0	CGCAGCTCTTATACAACTCGCGGAAGCGAGTTGTGTAAGAGCTGCGACACTCTTTCCCTA	16497.3
dBr_0673	8942	19433	19433	0	CGCTCGTCTGTATCATTTCGCGGAAGCGAAATGATACAGACGAGCGACACTCTTTCCCTA	16537
TDG_TG_f1AAT_f2CCTA_rep_2	8402	15367	15367	0	CGCAGCTCAATTCCTACTCGCGGAAGCGAGTAGGGATTGAGCTGCGACACTCTTTCCCTA	12769.5
TDG_TG_f1GGC_f2TGCC_rep_9	7973	17893	17893	0	CGCAGCTCGGCTTGCCCTCGCGGAAGCGAGGGCAGGCCGAGCTGCGACACTCTTTCCCTA	14747.7
TDG_TG_f1ACC_f2TTCG_rep_9	10722	22757	22757	0	CGCAGCTCACCTTTCGCTCGCGGAAGCGAGCGAAGGGTGAGCTGCGACACTCTTTCCCTA	18398.9
TDG_TG_f1GCT_f2ATGG_rep_4	11219	22760	22760	0	CGCAGCTCGCTTATGGCTCGCGGAAGCGAGCCATGAGCGAGCTGCGACACTCTTTCCCTA	18267.5
TDG_TG_f1TCC_f2GCTA_rep_3	19151	40305	40305	0	CGCAGCTCTCCTGCTACTCGCGGAAGCGAGTAGCGGGAGAGCTGCGACACTCTTTCCCTA	31161.9
TDG_TG_f1GAC_f2ATGC_rep_7	13032	27688	27688	0	CGCAGCTCGACTATGCCTCGCGGAAGCGAGGCATGGTCGAGCTGCGACACTCTTTCCCTA	21380.8
TDG_TG_f1CAC_f2AAGG_rep_6	11480	23869	23869	0	CGCAGCTCCACTAAGGCTCGCGGAAGCGAGCCTTGGTGGAGCTGCGACACTCTTTCCCTA	17826.4
TDG_TG_f1AGC_f2AAAT_rep_10	10818	21691	21691	0	CGCAGCTCAGCTAAATCTCGCGGAAGCGAGATTTGGCTGAGCTGCGACACTCTTTCCCTA	16070.5
TDG_TG_f1TCT_f2ACGG_rep_7	12519	24758	24758	0	CGCAGCTCTCTTACGGCTCGCGGAAGCGAGCCGTGAGAGAGCTGCGACACTCTTTCCCTA	18254.5
TDG_TG_f1GGT_f2ACAA_rep_4	12008	24073	24073	0	CGCAGCTCGGTTACAACTCGCGGAAGCGAGTTGTGACCGAGCTGCGACACTCTTTCCCTA	17694.6
TDG_TG_f1TTC_f2CATC_rep_7	10786	21304	21304	0	CGCAGCTCTTCTCATCCTCGCGGAAGCGAGGATGGGAAGAGCTGCGACACTCTTTCCCTA	15301.9
TDG_TG_f1TCC_f2TCTT_rep_4	9218	18926	18926	0	CGCAGCTCTCCTTCTTCTCGCGGAAGCGAGAAGAGGGAGAGCTGCGACACTCTTTCCCTA	13441.6
TDG_TG_f1GTA_f2CTAT_rep_9	9984	21491	21491	0	CGCAGCTCGTATCTATCTCGCGGAAGCGAGATAGGTACGAGCTGCGACACTCTTTCCCTA	15238.5
TDG_TG_f1TGG_f2TCCT_rep_8	10181	20490	20490	0	CGCAGCTCTGGTTCCTCTCGCGGAAGCGAGAGGAGCCAGAGCTGCGACACTCTTTCCCTA	14469.6
TDG_TG_f1CGC_f2CTGT_rep_3	12365	25999	25999	0	CGCAGCTCCGCTCTGTCTCGCGGAAGCGAGACAGGGCGGAGCTGCGACACTCTTTCCCTA	18251.1
TDG_TG_f1GGC_f2CAGG_rep_5	11960	23390	23390	0	CGCAGCTCGGCTCAGGCTCGCGGAAGCGAGCCTGGGCCGAGCTGCGACACTCTTTCCCTA	16551.2
TDG_TG_f1GGC_f2ACCG_rep_8	15400	29708	29708	0	CGCAGCTCGGCTACCGCTCGCGGAAGCGAGCGGTGGCCGAGCTGCGACACTCTTTCCCTA	20834.6
TDG_TG_f1CTG_f2AAAG_rep_7	13631	28566	28566	0	CGCAGCTCCTGTAAAGCTCGCGGAAGCGAGCTTTGCAGGAGCTGCGACACTCTTTCCCTA	20255.2
TDG_TG_f1TGA_f2CACT_rep_7	10216	19788	19788	0	CGCAGCTCTGATCACTCTCGCGGAAGCGAGAGTGGTCAGAGCTGCGACACTCTTTCCCTA	14053.8
TDG_TG_f1CGT_f2ATGG_rep_5	13837	28998	28998	0	CGCAGCTCCGTTATGGCTCGCGGAAGCGAGCCATGACGGAGCTGCGACACTCTTTCCCTA	20561.5
TDG_TG_f1CCC_f2TAGT_rep_3	8921	18933	18933	0	CGCAGCTCCCCTTAGTCTCGCGGAAGCGAGACTAGGGGGAGCTGCGACACTCTTTCCCTA	13514.9
TDG_TG_f1ATG_f2GGTC_rep_10	26916	51455	53197	0	CGCAGCTCATGTGGTCCTCGCGGAAGCGAGGACCGCATGAGCTGCGACACTCTTTCCCTA	37956.1
[truncated: 171,473 more rows]

## Sheet: ARP_NNTNNNN_raw_forBindingCor
Name	raw_488signal	Flags	Sequence	Norm
TDG_TG_f1CC_f2TCCG_rep_7	18902	0	CGCAGCTCCCTTCCGCTCGCGGAAGCGAGCGGAGGGGAGCTGCGGTAGACATTAAAGATT	21358.3
TDG_TG_f1AT_f2CGGC_rep_2	19565	0	CGCAGCTCATTCGGCCTCGCGGAAGCGAGGCCGGATGAGCTGCGGTAGACATTAAAGATT	22107.5
TDG_TG_f1AA_f2AAGG_rep_9	20107	0	CGCAGCTCAATAAGGCTCGCGGAAGCGAGCCTTGTTGAGCTGCGGTAGACATTAAAGATT	22719.9
TDG_TG_f1GT_f2AAGA_rep_4	19706	0	CGCAGCTCGTTAAGACTCGCGGAAGCGAGTCTTGACGAGCTGCGGTAGACATTAAAGATT	22266.8
TDG_ff_TG_H_f1AG_f2AA_rep_6	29098	0	CGCAGCAGAGTGTATAACGCGGAAGCGTTATACGCTCTGCTGCGGTAGACATTAAAGATT	32909.9
TDG_TG_H_M1TG_M2CA_rep_8	18366	0	CGCAGCTCATTCTATCTCGCGGAAGCGAGATAAGGTGAGCTGCGGTAGACATTAAAGATT	20592.3
TDG_TG_f1GA_f2CCCC_rep_6	19903	0	CGCAGCTCGATCCCCCTCGCGGAAGCGAGGGGGGTCGAGCTGCGGTAGACATTAAAGATT	22305.1
TDG_TG_f1AA_f2CTAT_rep_3	19262	0	CGCAGCTCAATCTATCTCGCGGAAGCGAGATAGGTTGAGCTGCGGTAGACATTAAAGATT	21603.1
TDG_TG_f1CG_f2TTAA_rep_3	18389	0	CGCAGCTCCGTTTAACTCGCGGAAGCGAGTTAAGCGGAGCTGCGGTAGACATTAAAGATT	20576.2
TDG_TG_f1CA_f2GCTA_rep_7	24690	0	CGCAGCTCCATGCTACTCGCGGAAGCGAGTAGCGTGGAGCTGCGGTAGACATTAAAGATT	27607.1
TDG_TG_H_M1GA_M2CC_rep_2	18649	0	CGCAGCTCAGTCTATCTCGCGGAAGCGAGATACGATGAGCTGCGGTAGACATTAAAGATT	20852.3
TDG_TG_f1CC_f2AGAA_rep_9	20502	0	CGCAGCTCCCTAGAACTCGCGGAAGCGAGTTCTGGGGAGCTGCGGTAGACATTAAAGATT	22853
TDG_TG_f1CT_f2AGAC_rep_10	21947	0	CGCAGCTCCTTAGACCTCGCGGAAGCGAGGTCTGAGGAGCTGCGGTAGACATTAAAGATT	24238.7
TDG_TG_f1AT_f2ACTG_rep_7	20756	0	CGCAGCTCATTACTGCTCGCGGAAGCGAGCAGTGATGAGCTGCGGTAGACATTAAAGATT	23110
TDG_TG_M_M1CT_M2GA_rep_7	18598	0	CGCAGCTCTCTGGGTCTCGCGGAAGCGAGACCAGTAGAGCTGCGGTAGACATTAAAGATT	20806.1
TDG_TG_f1TC_f2CGAG_rep_8	18768	0	CGCAGCTCTCTCGAGCTCGCGGAAGCGAGCTCGGGAGAGCTGCGGTAGACATTAAAGATT	20855.8
TDG_ff_TG_H_f1CC_f2CC_rep_4	26304	0	CGCAGCCCAGTGTATCCCGCGGAAGCGGGATACGCTGGGCTGCGGTAGACATTAAAGATT	29265.1
TDG_TG_f1GC_f2CGCC_rep_7	20064	0	CGCAGCTCGCTCGCCCTCGCGGAAGCGAGGGCGGGCGAGCTGCGGTAGACATTAAAGATT	22296
TDG_ff_TG_M_f1CT_f2AT_rep_4	21571	0	CGCAGCCTTTTAGGTATCGCGGAAGCGATACCTGAAAGGCTGCGGTAGACATTAAAGATT	23886.5
TDG_TG_f1TC_f2TCCA_rep_9	18407	0	CGCAGCTCTCTTCCACTCGCGGAAGCGAGTGGAGGAGAGCTGCGGTAGACATTAAAGATT	20355.7
TDG_TG_f1GC_f2GTTA_rep_5	24037	0	CGCAGCTCGCTGTTACTCGCGGAAGCGAGTAACGGCGAGCTGCGGTAGACATTAAAGATT	26543.9
TDG_TG_H_M1TC_M2AA_rep_9	18832	0	CGCAGCTCATTATATCTCGCGGAAGCGAGATAAGCTGAGCTGCGGTAGACATTAAAGATT	20676.8
TDG_TG_f1GC_f2TGGG_rep_8	18885	0	CGCAGCTCGCTTGGGCTCGCGGAAGCGAGCCCAGGCGAGCTGCGGTAGACATTAAAGATT	20735
TDG_TG_f1TG_f2AGCC_rep_3	23502	0	CGCAGCTCTGTAGCCCTCGCGGAAGCGAGGGCTGCAGAGCTGCGGTAGACATTAAAGATT	25942.8
TDG_TG_f1GG_f2GAGT_rep_9	24211	0	CGCAGCTCGGTGAGTCTCGCGGAAGCGAGACTCGCCGAGCTGCGGTAGACATTAAAGATT	26763.5
TDG_TG_f1AC_f2AATA_rep_10	20122	0	CGCAGCTCACTAATACTCGCGGAAGCGAGTATTGGTGAGCTGCGGTAGACATTAAAGATT	22089.6
TDG_TG_f1AT_f2CCGA_rep_9	18723	0	CGCAGCTCATTCCGACTCGCGGAAGCGAGTCGGGATGAGCTGCGGTAGACATTAAAGATT	20732.7
TDG_TG_f1CG_f2CACT_rep_1	19291	0	CGCAGCTCCGTCACTCTCGCGGAAGCGAGAGTGGCGGAGCTGCGGTAGACATTAAAGATT	21222.7
TDG_TG_f1TC_f2CCTC_rep_6	18578	0	CGCAGCTCTCTCCTCCTCGCGGAAGCGAGGAGGGGAGAGCTGCGGTAGACATTAAAGATT	20373.4
TDG_TG_f1GA_f2GGTG_rep_1	24855	0	CGCAGCTCGATGGTGCTCGCGGAAGCGAGCACCGTCGAGCTGCGGTAGACATTAAAGATT	27397.9
TDG_TG_f1TG_f2TTTT_rep_4	18378	0	CGCAGCTCTGTTTTTCTCGCGGAAGCGAGAAAAGCAGAGCTGCGGTAGACATTAAAGATT	20276.7
TDG_TG_f1AG_f2ACGT_rep_8	21702	0	CGCAGCTCAGTACGTCTCGCGGAAGCGAGACGTGCTGAGCTGCGGTAGACATTAAAGATT	24035.5
TDG_ff_TG_H_f1TC_f2CG_rep_4	26010	0	CGCAGCTCAGTGTATCGCGCGGAAGCGCGATACGCTGAGCTGCGGTAGACATTAAAGATT	28720.6
TDG_TG_f1GC_f2CTAG_rep_5	18512	0	CGCAGCTCGCTCTAGCTCGCGGAAGCGAGCTAGGGCGAGCTGCGGTAGACATTAAAGATT	20565.5
TDG_TG_f1AC_f2ATCT_rep_9	21336	0	CGCAGCTCACTATCTCTCGCGGAAGCGAGAGATGGTGAGCTGCGGTAGACATTAAAGATT	23841
TDG_TG_f1TC_f2GGGA_rep_9	22762	0	CGCAGCTCTCTGGGACTCGCGGAAGCGAGTCCCGGAGAGCTGCGGTAGACATTAAAGATT	25442.9
TDG_TG_f1CT_f2AAGA_rep_8	19229	0	CGCAGCTCCTTAAGACTCGCGGAAGCGAGTCTTGAGGAGCTGCGGTAGACATTAAAGATT	21447.1
TDG_TG_L_M1CG_M2GG_rep_1	20308	0	CGCAGCTCCCTGAGCCTCGCGGAAGCGAGGCTGGGGGAGCTGCGGTAGACATTAAAGATT	22601.6
TDG_TG_f1TT_f2CGTG_rep_9	18637	0	CGCAGCTCTTTCGTGCTCGCGGAAGCGAGCACGGAAGAGCTGCGGTAGACATTAAAGATT	20685.4
TDG_ff_TG_H_f1GA_f2TG_rep_4	27793	0	CGCAGCGAAGTGTATTGCGCGGAAGCGCAATACGCTTCGCTGCGGTAGACATTAAAGATT	30828.3
TDG_ff_TG_M_f1GG_f2CT_rep_10	22203	0	CGCAGCGGTTTAGGTCTCGCGGAAGCGAGACCTGAACCGCTGCGGTAGACATTAAAGATT	24665.4
TDG_TG_f1CT_f2GGTC_rep_10	24202	0	CGCAGCTCCTTGGTCCTCGCGGAAGCGAGGACCGAGGAGCTGCGGTAGACATTAAAGATT	26587.7
TDG_TG_M_M1AA_M2AT_rep_7	19409	0	CGCAGCTCTATAGGTCTCGCGGAAGCGAGACCTGAAGAGCTGCGGTAGACATTAAAGATT	21322.2
TDG_TG_f1TG_f2CTAT_rep_4	21356	0	CGCAGCTCTGTCTATCTCGCGGAAGCGAGATAGGCAGAGCTGCGGTAGACATTAAAGATT	23581.6
TDG_TG_f1GA_f2TAGA_rep_1	18941	0	CGCAGCTCGATTAGACTCGCGGAAGCGAGTCTAGTCGAGCTGCGGTAGACATTAAAGATT	20602.9
TDG_TG_f1GC_f2TTAG_rep_4	18885	0	CGCAGCTCGCTTTAGCTCGCGGAAGCGAGCTAAGGCGAGCTGCGGTAGACATTAAAGATT	20651.7
TDG_TG_f1AG_f2CTAC_rep_4	24040	0	CGCAGCTCAGTCTACCTCGCGGAAGCGAGGTAGGCTGAGCTGCGGTAGACATTAAAGATT	25886.9
TDG_TG_f1TC_f2GATC_rep_8	23931	0	CGCAGCTCTCTGATCCTCGCGGAAGCGAGGATCGGAGAGCTGCGGTAGACATTAAAGATT	26169.7
TDG_TG_f1TC_f2CCCT_rep_10	19825	0	CGCAGCTCTCTCCCTCTCGCGGAAGCGAGAGGGGGAGAGCTGCGGTAGACATTAAAGATT	21661.6
TDG_TG_f1AC_f2GGGT_rep_2	24890	0	CGCAGCTCACTGGGTCTCGCGGAAGCGAGACCCGGTGAGCTGCGGTAGACATTAAAGATT	27207.1
TDG_TG_f1CG_f2TTAA_rep_5	19466	0	CGCAGCTCCGTTTAACTCGCGGAAGCGAGTTAAGCGGAGCTGCGGTAGACATTAAAGATT	21287
TDG_ff_TG_H_f1AC_f2TG_rep_5	29183	0	CGCAGCACAGTGTATTGCGCGGAAGCGCAATACGCTGTGCTGCGGTAGACATTAAAGATT	31871.8
TDG_TG_f1AC_f2TCTA_rep_9	19643	0	CGCAGCTCACTTCTACTCGCGGAAGCGAGTAGAGGTGAGCTGCGGTAGACATTAAAGATT	21452.8
TDG_ff_TG_M_f1CC_f2TA_rep_2	22716	0	CGCAGCCCTTTAGGTTACGCGGAAGCGTAACCTGAAGGGCTGCGGTAGACATTAAAGATT	24768.3
TDG_TG_f1CA_f2ACCT_rep_10	20856	0	CGCAGCTCCATACCTCTCGCGGAAGCGAGAGGTGTGGAGCTGCGGTAGACATTAAAGATT	22644.3
TDG_TG_f1GG_f2TTGC_rep_6	19925	0	CGCAGCTCGGTTTGCCTCGCGGAAGCGAGGCAAGCCGAGCTGCGGTAGACATTAAAGATT	21559.8
TDG_ff_TG_L_f1GA_f2CC_rep_5	22738	0	CGCAGCGACATTAGCCCCGCGGAAGCGGGGCTAGTGTCGCTGCGGTAGACATTAAAGATT	24682.6
TDG_TG_L_M1GT_M2AG_rep_1	19670	0	CGCAGCTCCGTAAGCCTCGCGGAAGCGAGGCTGGTGGAGCTGCGGTAGACATTAAAGATT	21472.4
TDG_TG_f1CG_f2GGTG_rep_4	24786	0	CGCAGCTCCGTGGTGCTCGCGGAAGCGAGCACCGCGGAGCTGCGGTAGACATTAAAGATT	27048.4
TDG_TG_f1GT_f2CCCT_rep_10	18785	0	CGCAGCTCGTTCCCTCTCGCGGAAGCGAGAGGGGACGAGCTGCGGTAGACATTAAAGATT	20492.1
TDG_TG_H_M1AA_M2AC_rep_2	19035	0	CGCAGCTCAATATATCTCGCGGAAGCGAGATACGATGAGCTGCGGTAGACATTAAAGATT	20618.4
TDG_ff_TG_M_f1AT_f2TT_rep_5	23566	0	CGCAGCATTTTAGGTTTCGCGGAAGCGAAACCTGAAATGCTGCGGTAGACATTAAAGATT	25461.1
TDG_TG_f1CT_f2GCTA_rep_8	24494	0	CGCAGCTCCTTGCTACTCGCGGAAGCGAGTAGCGAGGAGCTGCGGTAGACATTAAAGATT	26479.4
TDG_TG_L_M1GG_M2GA_rep_5	19683	0	CGCAGCTCCGTGAGCCTCGCGGAAGCGAGGCTAGGGGAGCTGCGGTAGACATTAAAGATT	21294.5
TDG_TG_f1AG_f2AGGC_rep_7	23956	0	CGCAGCTCAGTAGGCCTCGCGGAAGCGAGGCCTGCTGAGCTGCGGTAGACATTAAAGATT	25825.8
TDG_TG_f1CC_f2CACG_rep_10	20075	0	CGCAGCTCCCTCACGCTCGCGGAAGCGAGCGTGGGGGAGCTGCGGTAGACATTAAAGATT	21676.5
TDG_TG_f1TC_f2ACGA_rep_2	20406	0	CGCAGCTCTCTACGACTCGCGGAAGCGAGTCGTGGAGAGCTGCGGTAGACATTAAAGATT	21706.9
TDG_TG_f1AC_f2GCCA_rep_7	24261	0	CGCAGCTCACTGCCACTCGCGGAAGCGAGTGGCGGTGAGCTGCGGTAGACATTAAAGATT	25708.9
TDG_TG_f1GT_f2GCAC_rep_5	24166	0	CGCAGCTCGTTGCACCTCGCGGAAGCGAGGTGCGACGAGCTGCGGTAGACATTAAAGATT	25628.3
TDG_TG_f1CA_f2ACAA_rep_5	20499	0	CGCAGCTCCATACAACTCGCGGAAGCGAGTTGTGTGGAGCTGCGGTAGACATTAAAGATT	21851.6
TDG_TG_f1GG_f2ACGA_rep_10	21961	0	CGCAGCTCGGTACGACTCGCGGAAGCGAGTCGTGCCGAGCTGCGGTAGACATTAAAGATT	23448.6
TDG_TG_f1CT_f2GCTG_rep_10	23950	0	CGCAGCTCCTTGCTGCTCGCGGAAGCGAGCAGCGAGGAGCTGCGGTAGACATTAAAGATT	25150.1
TDG_TG_M_M1CA_M2CT_rep_7	18863	0	CGCAGCTCTCTCGGTCTCGCGGAAGCGAGACCTGAAGAGCTGCGGTAGACATTAAAGATT	19735.1
TDG_TG_f1AA_f2ATGG_rep_6	20905	0	CGCAGCTCAATATGGCTCGCGGAAGCGAGCCATGTTGAGCTGCGGTAGACATTAAAGATT	22073
TDG_TG_f1GT_f2GCTG_rep_5	23334	0	CGCAGCTCGTTGCTGCTCGCGGAAGCGAGCAGCGACGAGCTGCGGTAGACATTAAAGATT	24606.4
TDG_TG_f1CT_f2GGGT_rep_8	24392	0	CGCAGCTCCTTGGGTCTCGCGGAAGCGAGACCCGAGGAGCTGCGGTAGACATTAAAGATT	25659.2
TDG_TG_f1CG_f2ATCT_rep_1	22257	0	CGCAGCTCCGTATCTCTCGCGGAAGCGAGAGATGCGGAGCTGCGGTAGACATTAAAGATT	23372.3
TDG_TG_f1TC_f2ATAT_rep_4	21268	0	CGCAGCTCTCTATATCTCGCGGAAGCGAGATATGGAGAGCTGCGGTAGACATTAAAGATT	22212
TDG_TG_f1TC_f2GGTC_rep_2	24585	0	CGCAGCTCTCTGGTCCTCGCGGAAGCGAGGACCGGAGAGCTGCGGTAGACATTAAAGATT	25583
TDG_TG_f1GC_f2CTTT_rep_5	19615	0	CGCAGCTCGCTCTTTCTCGCGGAAGCGAGAAAGGGCGAGCTGCGGTAGACATTAAAGATT	20359.8
TDG_TG_f1AC_f2CTTG_rep_9	19930	0	CGCAGCTCACTCTTGCTCGCGGAAGCGAGCAAGGGTGAGCTGCGGTAGACATTAAAGATT	20438.8
TDG_TG_f1CT_f2CCTG_rep_6	19880	0	CGCAGCTCCTTCCTGCTCGCGGAAGCGAGCAGGGAGGAGCTGCGGTAGACATTAAAGATT	20335.1
TDG_TG_f1GC_f2GAAA_rep_1	24821	0	CGCAGCTCGCTGAAACTCGCGGAAGCGAGTTTCGGCGAGCTGCGGTAGACATTAAAGATT	25445.3
TDG_TG_f1CC_f2TACC_rep_3	20569	0	CGCAGCTCCCTTACCCTCGCGGAAGCGAGGGTAGGGGAGCTGCGGTAGACATTAAAGATT	21061.3
TDG_TG_f1GT_f2CCGC_rep_6	20355	0	CGCAGCTCGTTCCGCCTCGCGGAAGCGAGGCGGGACGAGCTGCGGTAGACATTAAAGATT	20797.1
TDG_ff_TG_M_f1GG_f2CC_rep_4	23107	0	CGCAGCGGTTTAGGTCCCGCGGAAGCGGGACCTGAACCGCTGCGGTAGACATTAAAGATT	23643.6
TDG_ff_TG_H_f1GG_f2AT_rep_3	29399	0	CGCAGCGGAGTGTATATCGCGGAAGCGATATACGCTCCGCTGCGGTAGACATTAAAGATT	30149.6
TDG_TG_f1AT_f2CGCA_rep_10	22636	0	CGCAGCTCATTCGCACTCGCGGAAGCGAGTGCGGATGAGCTGCGGTAGACATTAAAGATT	23107.7
TDG_TG_H_M1TT_M2GT_rep_9	27397	0	CGCAGCTCATTGTATCTCGCGGAAGCGAGATATGTTGAGCTGCGGTAGACATTAAAGATT	27967.9
TDG_TG_H_M1TC_M2AT_rep_7	20984	0	CGCAGCTCATTATATCTCGCGGAAGCGAGATATGCTGAGCTGCGGTAGACATTAAAGATT	21445.8
TDG_TG_f1AC_f2GTAT_rep_3	26752	0	CGCAGCTCACTGTATCTCGCGGAAGCGAGATACGGTGAGCTGCGGTAGACATTAAAGATT	27407.1
TDG_ff_TG_M_f1TA_f2AA_rep_9	23945	0	CGCAGCTATTTAGGTAACGCGGAAGCGTTACCTGAATAGCTGCGGTAGACATTAAAGATT	24630
TDG_TG_f1CG_f2GAGC_rep_9	24432	0	CGCAGCTCCGTGAGCCTCGCGGAAGCGAGGCTCGCGGAGCTGCGGTAGACATTAAAGATT	25178.5
TDG_TG_f1GC_f2TTTA_rep_2	19722	0	CGCAGCTCGCTTTTACTCGCGGAAGCGAGTAAAGGCGAGCTGCGGTAGACATTAAAGATT	20528.9
TDG_TG_M_M1AC_M2GC_rep_6	23769	0	CGCAGCTCTATGGGTCTCGCGGAAGCGAGACCCGCAGAGCTGCGGTAGACATTAAAGATT	24857.4
TDG_TG_H_M1GA_M2AC_rep_7	22412	0	CGCAGCTCAGTATATCTCGCGGAAGCGAGATACGATGAGCTGCGGTAGACATTAAAGATT	23419.7
TDG_TG_f1TA_f2ACAG_rep_9	22228	0	CGCAGCTCTATACAGCTCGCGGAAGCGAGCTGTGTAGAGCTGCGGTAGACATTAAAGATT	23375
TDG_TG_f1TC_f2CACC_rep_5	20534	0	CGCAGCTCTCTCACCCTCGCGGAAGCGAGGGTGGGAGAGCTGCGGTAGACATTAAAGATT	21684.7
TDG_TG_f1CC_f2CCGA_rep_5	21439	0	CGCAGCTCCCTCCGACTCGCGGAAGCGAGTCGGGGGGAGCTGCGGTAGACATTAAAGATT	22712.4
TDG_TG_f1TT_f2TAAT_rep_9	20479	0	CGCAGCTCTTTTAATCTCGCGGAAGCGAGATTAGAAGAGCTGCGGTAGACATTAAAGATT	21619.4
TDG_ff_TG_H_f1AG_f2CA_rep_10	31810	0	CGCAGCAGAGTGTATCACGCGGAAGCGTGATACGCTCTGCTGCGGTAGACATTAAAGATT	33472.3
TDG_ff_TA_H_f1CT_f2TC_rep_6	21483	0	CGCAGCCTAGTGTATTCCGCGGAAGCGGAATACACTAGGCTGCGGTAGACATTAAAGATT	22686.9
TDG_TG_f1TT_f2CTTC_rep_9	19698	0	CGCAGCTCTTTCTTCCTCGCGGAAGCGAGGAAGGAAGAGCTGCGGTAGACATTAAAGATT	20674
TDG_TG_f1CA_f2CACA_rep_9	21150	0	CGCAGCTCCATCACACTCGCGGAAGCGAGTGTGGTGGAGCTGCGGTAGACATTAAAGATT	22155.7
TDG_TG_f1GT_f2ACGT_rep_5	21939	0	CGCAGCTCGTTACGTCTCGCGGAAGCGAGACGTGACGAGCTGCGGTAGACATTAAAGATT	22925.4
TDG_TG_f1TG_f2ATGC_rep_1	23317	0	CGCAGCTCTGTATGCCTCGCGGAAGCGAGGCATGCAGAGCTGCGGTAGACATTAAAGATT	24493
TDG_TG_f1CG_f2AAGC_rep_2	21453	0	CGCAGCTCCGTAAGCCTCGCGGAAGCGAGGCTTGCGGAGCTGCGGTAGACATTAAAGATT	22436.4
TDG_TG_f1CC_f2GCAT_rep_5	26384	0	CGCAGCTCCCTGCATCTCGCGGAAGCGAGATGCGGGGAGCTGCGGTAGACATTAAAGATT	27432.1
TDG_TG_f1GA_f2ACAG_rep_2	22359	0	CGCAGCTCGATACAGCTCGCGGAAGCGAGCTGTGTCGAGCTGCGGTAGACATTAAAGATT	23223.2
TDG_TG_M_M1AT_M2CA_rep_4	20893	0	CGCAGCTCTATCGGTCTCGCGGAAGCGAGACCAGTAGAGCTGCGGTAGACATTAAAGATT	21716.8
TDG_TG_f1GT_f2GGTC_rep_8	26785	0	CGCAGCTCGTTGGTCCTCGCGGAAGCGAGGACCGACGAGCTGCGGTAGACATTAAAGATT	27838
TDG_ff_TG_L_f1GT_f2GC_rep_3	23330	0	CGCAGCGTCATTAGCGCCGCGGAAGCGGCGCTAGTGACGCTGCGGTAGACATTAAAGATT	24052.8
TDG_TG_M_M1AG_M2CG_rep_5	20604	0	CGCAGCTCTATCGGTCTCGCGGAAGCGAGACCGGGAGAGCTGCGGTAGACATTAAAGATT	21166.7
TDG_TG_f1AG_f2CCGC_rep_6	23797	0	CGCAGCTCAGTCCGCCTCGCGGAAGCGAGGCGGGCTGAGCTGCGGTAGACATTAAAGATT	24234.4
TDG_TG_f1GT_f2AGAT_rep_6	24300	0	CGCAGCTCGTTAGATCTCGCGGAAGCGAGATCTGACGAGCTGCGGTAGACATTAAAGATT	24808.5
TDG_TG_f1TC_f2CCAA_rep_1	20770	0	CGCAGCTCTCTCCAACTCGCGGAAGCGAGTTGGGGAGAGCTGCGGTAGACATTAAAGATT	21235.8
TDG_ff_TG_L_f1GT_f2CA_rep_9	23141	0	CGCAGCGTCATTAGCCACGCGGAAGCGTGGCTAGTGACGCTGCGGTAGACATTAAAGATT	23857.9
TDG_TG_f1TA_f2CACG_rep_7	21196	0	CGCAGCTCTATCACGCTCGCGGAAGCGAGCGTGGTAGAGCTGCGGTAGACATTAAAGATT	21917.6
TDG_TG_f1TA_f2GCTG_rep_3	27859	0	CGCAGCTCTATGCTGCTCGCGGAAGCGAGCAGCGTAGAGCTGCGGTAGACATTAAAGATT	28743.4
TDG_TG_H_M1GA_M2GC_rep_1	27420	0	CGCAGCTCAGTGTATCTCGCGGAAGCGAGATACGATGAGCTGCGGTAGACATTAAAGATT	28013.8
TDG_TG_f1AA_f2GCTC_rep_5	27525	0	CGCAGCTCAATGCTCCTCGCGGAAGCGAGGAGCGTTGAGCTGCGGTAGACATTAAAGATT	28227.7
TDG_TG_M_M1CT_M2TT_rep_6	20412	0	CGCAGCTCTCTTGGTCTCGCGGAAGCGAGACCTGTAGAGCTGCGGTAGACATTAAAGATT	20954
TDG_TG_L_M1AG_M2TG_rep_9	21596	0	CGCAGCTCCATTAGCCTCGCGGAAGCGAGGCTGGGGGAGCTGCGGTAGACATTAAAGATT	22125.3
TDG_TG_f1GG_f2GCGG_rep_4	27530	0	CGCAGCTCGGTGCGGCTCGCGGAAGCGAGCCGCGCCGAGCTGCGGTAGACATTAAAGATT	28382.9
TDG_TG_f1AT_f2TAGA_rep_3	20807	0	CGCAGCTCATTTAGACTCGCGGAAGCGAGTCTAGATGAGCTGCGGTAGACATTAAAGATT	21357.6
TDG_TG_f1TC_f2TAAC_rep_3	20069	0	CGCAGCTCTCTTAACCTCGCGGAAGCGAGGTTAGGAGAGCTGCGGTAGACATTAAAGATT	20661.1
TDG_TG_f1GT_f2GGCT_rep_10	26004	0	CGCAGCTCGTTGGCTCTCGCGGAAGCGAGAGCCGACGAGCTGCGGTAGACATTAAAGATT	27079.9
TDG_TG_f1GC_f2TGTC_rep_9	21299	0	CGCAGCTCGCTTGTCCTCGCGGAAGCGAGGACAGGCGAGCTGCGGTAGACATTAAAGATT	22200.7
TDG_TG_f1TA_f2AGCT_rep_8	25882	0	CGCAGCTCTATAGCTCTCGCGGAAGCGAGAGCTGTAGAGCTGCGGTAGACATTAAAGATT	27299.5
TDG_TG_f1GC_f2TACT_rep_3	21013	0	CGCAGCTCGCTTACTCTCGCGGAAGCGAGAGTAGGCGAGCTGCGGTAGACATTAAAGATT	22076.7
TDG_TG_f1GC_f2TTGG_rep_8	21272	0	CGCAGCTCGCTTTGGCTCGCGGAAGCGAGCCAAGGCGAGCTGCGGTAGACATTAAAGATT	22350.8
TDG_CG_f1CC_f2TATT_rep_9	21119	0	CGCAGCTCCCCTATTCTCGCGGAAGCGAGAATAGGGGAGCTGCGGTAGACATTAAAGATT	22131.1
TDG_TG_f1AA_f2TGGC_rep_10	21081	0	CGCAGCTCAATTGGCCTCGCGGAAGCGAGGCCAGTTGAGCTGCGGTAGACATTAAAGATT	21818.7
TDG_TG_f1AT_f2GCCC_rep_6	25951	0	CGCAGCTCATTGCCCCTCGCGGAAGCGAGGGGCGATGAGCTGCGGTAGACATTAAAGATT	26833.3
TDG_TG_f1TC_f2CGAT_rep_5	21018	0	CGCAGCTCTCTCGATCTCGCGGAAGCGAGATCGGGAGAGCTGCGGTAGACATTAAAGATT	21747.8
TDG_TG_f1AG_f2TGAC_rep_2	21809	0	CGCAGCTCAGTTGACCTCGCGGAAGCGAGGTCAGCTGAGCTGCGGTAGACATTAAAGATT	22549
TDG_TG_f1CC_f2GGCC_rep_10	25770	0	CGCAGCTCCCTGGCCCTCGCGGAAGCGAGGGCCGGGGAGCTGCGGTAGACATTAAAGATT	26646.2
TDG_TG_f1GC_f2TGAC_rep_3	21057	0	CGCAGCTCGCTTGACCTCGCGGAAGCGAGGTCAGGCGAGCTGCGGTAGACATTAAAGATT	21787.2
TDG_ff_TG_L_f1TA_f2TG_rep_5	21374	0	CGCAGCTACATTAGCTGCGCGGAAGCGCAGCTAGTGTAGCTGCGGTAGACATTAAAGATT	22057.8
TDG_ff_TG_L_f1TA_f2GT_rep_3	22620	0	CGCAGCTACATTAGCGTCGCGGAAGCGACGCTAGTGTAGCTGCGGTAGACATTAAAGATT	23402.9
TDG_TG_f1TG_f2CGCT_rep_1	24768	0	CGCAGCTCTGTCGCTCTCGCGGAAGCGAGAGCGGCAGAGCTGCGGTAGACATTAAAGATT	25608.4
TDG_TG_f1GA_f2TATA_rep_7	20989	0	CGCAGCTCGATTATACTCGCGGAAGCGAGTATAGTCGAGCTGCGGTAGACATTAAAGATT	21539.8
TDG_TG_f1GA_f2GTTC_rep_5	27333	0	CGCAGCTCGATGTTCCTCGCGGAAGCGAGGAACGTCGAGCTGCGGTAGACATTAAAGATT	28050.3
TDG_TG_f1TT_f2TGCC_rep_6	20387	0	CGCAGCTCTTTTGCCCTCGCGGAAGCGAGGGCAGAAGAGCTGCGGTAGACATTAAAGATT	20951.5
TDG_TG_f1TC_f2TCCG_rep_5	20007	0	CGCAGCTCTCTTCCGCTCGCGGAAGCGAGCGGAGGAGAGCTGCGGTAGACATTAAAGATT	20561
TDG_TG_f1CC_f2ACAC_rep_4	21662	0	CGCAGCTCCCTACACCTCGCGGAAGCGAGGTGTGGGGAGCTGCGGTAGACATTAAAGATT	22217.4
TDG_TG_f1TG_f2CTCG_rep_2	25414	0	CGCAGCTCTGTCTCGCTCGCGGAAGCGAGCGAGGCAGAGCTGCGGTAGACATTAAAGATT	26065.6
TDG_TG_f1AT_f2AACT_rep_4	23052	0	CGCAGCTCATTAACTCTCGCGGAAGCGAGAGTTGATGAGCTGCGGTAGACATTAAAGATT	23852.5
TDG_TG_f1CA_f2GTGG_rep_2	27720	0	CGCAGCTCCATGTGGCTCGCGGAAGCGAGCCACGTGGAGCTGCGGTAGACATTAAAGATT	28703.9
TDG_ff_TG_L_f1GT_f2AG_rep_2	21871	0	CGCAGCGTCATTAGCAGCGCGGAAGCGCTGCTAGTGACGCTGCGGTAGACATTAAAGATT	22677.1
TDG_TG_f1AT_f2GACG_rep_9	26979	0	CGCAGCTCATTGACGCTCGCGGAAGCGAGCGTCGATGAGCTGCGGTAGACATTAAAGATT	27973.3
TDG_TG_f1TT_f2CACG_rep_2	20453	0	CGCAGCTCTTTCACGCTCGCGGAAGCGAGCGTGGAAGAGCTGCGGTAGACATTAAAGATT	21191.5
TDG_TG_f1CC_f2CTCA_rep_8	22771	0	CGCAGCTCCCTCTCACTCGCGGAAGCGAGTGAGGGGGAGCTGCGGTAGACATTAAAGATT	23619
TDG_TG_H_M1CT_M2AA_rep_4	20576	0	CGCAGCTCACTATATCTCGCGGAAGCGAGATAAGTTGAGCTGCGGTAGACATTAAAGATT	21209.8
TDG_TG_L_M1CT_M2CC_rep_3	19915	0	CGCAGCTCCCTCAGCCTCGCGGAAGCGAGGCTCGTGGAGCTGCGGTAGACATTAAAGATT	20649
TDG_TG_f1GT_f2GGAA_rep_9	25745	0	CGCAGCTCGTTGGAACTCGCGGAAGCGAGTTCCGACGAGCTGCGGTAGACATTAAAGATT	26758.9
TDG_TG_f1AA_f2GGTT_rep_3	28317	0	CGCAGCTCAATGGTTCTCGCGGAAGCGAGAACCGTTGAGCTGCGGTAGACATTAAAGATT	29394.1
TDG_ff_TG_H_f1GG_f2AG_rep_3	29662	0	CGCAGCGGAGTGTATAGCGCGGAAGCGCTATACGCTCCGCTGCGGTAGACATTAAAGATT	30601.6
TDG_TG_f1GG_f2GATA_rep_4	26930	0	CGCAGCTCGGTGATACTCGCGGAAGCGAGTATCGCCGAGCTGCGGTAGACATTAAAGATT	27821.3
TDG_TG_f1GT_f2TAAT_rep_2	20453	0	CGCAGCTCGTTTAATCTCGCGGAAGCGAGATTAGACGAGCTGCGGTAGACATTAAAGATT	21158.6
TDG_TG_M_M1AA_M2CG_rep_4	20322	0	CGCAGCTCTATCGGTCTCGCGGAAGCGAGACCGGAAGAGCTGCGGTAGACATTAAAGATT	20477.8
TDG_TG_M_M1GA_M2CG_rep_3	20795	0	CGCAGCTCTGTCGGTCTCGCGGAAGCGAGACCGGAAGAGCTGCGGTAGACATTAAAGATT	20773.9
TDG_TG_f1GT_f2TTTG_rep_8	20137	0	CGCAGCTCGTTTTTGCTCGCGGAAGCGAGCAAAGACGAGCTGCGGTAGACATTAAAGATT	20084.8
TDG_TG_f1AG_f2AAAG_rep_5	23716	0	CGCAGCTCAGTAAAGCTCGCGGAAGCGAGCTTTGCTGAGCTGCGGTAGACATTAAAGATT	23666.5
TDG_TG_M_M1GT_M2AA_rep_5	20646	0	CGCAGCTCTGTAGGTCTCGCGGAAGCGAGACCAGTAGAGCTGCGGTAGACATTAAAGATT	20533.2
TDG_TG_f1AA_f2AATG_rep_5	22477	0	CGCAGCTCAATAATGCTCGCGGAAGCGAGCATTGTTGAGCTGCGGTAGACATTAAAGATT	22364.5
TDG_MM_TA_f1AG_f2GTCG_rep_6	21730	0	CGCAGCTCAGTGTCGCTCGCGGAAGCGAGCGACACTGAGCTGCGGTAGACATTAAAGATT	21594
TDG_ff_TG_H_f1AT_f2TT_rep_4	30701	0	CGCAGCATAGTGTATTTCGCGGAAGCGAAATACGCTATGCTGCGGTAGACATTAAAGATT	30515.3
TDG_ff_TG_M_f1GA_f2AA_rep_3	24932	0	CGCAGCGATTTAGGTAACGCGGAAGCGTTACCTGAATCGCTGCGGTAGACATTAAAGATT	24613.7
TDG_TG_H_M1AG_M2CA_rep_5	20425	0	CGCAGCTCAATCTATCTCGCGGAAGCGAGATAAGGTGAGCTGCGGTAGACATTAAAGATT	20081.3
TDG_TG_H_M1GT_M2TT_rep_3	20369	0	CGCAGCTCAGTTTATCTCGCGGAAGCGAGATATGTTGAGCTGCGGTAGACATTAAAGATT	20082.1
TDG_TG_f1GT_f2GTAT_rep_2	26837	0	CGCAGCTCGTTGTATCTCGCGGAAGCGAGATACGACGAGCTGCGGTAGACATTAAAGATT	26459
TDG_TG_f1AT_f2AAAC_rep_7	22644	0	CGCAGCTCATTAAACCTCGCGGAAGCGAGGTTTGATGAGCTGCGGTAGACATTAAAGATT	22325.1
TDG_ff_TG_L_f1TG_f2GT_rep_3	24477	0	CGCAGCTGCATTAGCGTCGCGGAAGCGACGCTAGTGCAGCTGCGGTAGACATTAAAGATT	24132.3
TDG_TG_f1AT_f2AAGC_rep_9	21974	0	CGCAGCTCATTAAGCCTCGCGGAAGCGAGGCTTGATGAGCTGCGGTAGACATTAAAGATT	21664.5
TDG_ff_TG_L_f1AT_f2AG_rep_2	21436	0	CGCAGCATCATTAGCAGCGCGGAAGCGCTGCTAGTGATGCTGCGGTAGACATTAAAGATT	24221.6
TDG_TG_L_M1GA_M2TG_rep_2	18675	0	CGCAGCTCCGTTAGCCTCGCGGAAGCGAGGCTGGAGGAGCTGCGGTAGACATTAAAGATT	21101.8
TDG_TG_f1GT_f2GGGC_rep_5	23625	0	CGCAGCTCGTTGGGCCTCGCGGAAGCGAGGCCCGACGAGCTGCGGTAGACATTAAAGATT	26695
TDG_TG_f1AC_f2CAAA_rep_3	19541	0	CGCAGCTCACTCAAACTCGCGGAAGCGAGTTTGGGTGAGCTGCGGTAGACATTAAAGATT	22080.3
TDG_TG_f1AA_f2GAAC_rep_2	25696	0	CGCAGCTCAATGAACCTCGCGGAAGCGAGGTTCGTTGAGCTGCGGTAGACATTAAAGATT	29035.2
TDG_TG_M_M1CT_M2GA_rep_4	18915	0	CGCAGCTCTCTGGGTCTCGCGGAAGCGAGACCAGTAGAGCTGCGGTAGACATTAAAGATT	21392.9
TDG_ff_TG_H_f1CG_f2AT_rep_4	27374	0	CGCAGCCGAGTGTATATCGCGGAAGCGATATACGCTCGGCTGCGGTAGACATTAAAGATT	30692.3
TDG_TG_L_M1CG_M2GC_rep_2	23412	0	CGCAGCTCCCTGAGCCTCGCGGAAGCGAGGCTCGGGGAGCTGCGGTAGACATTAAAGATT	26237.6
TDG_TG_f1GG_f2GGAC_rep_5	24997	0	CGCAGCTCGGTGGACCTCGCGGAAGCGAGGTCCGCCGAGCTGCGGTAGACATTAAAGATT	28035.1
TDG_ff_TG_L_f1CC_f2TT_rep_3	19551	0	CGCAGCCCCATTAGCTTCGCGGAAGCGAAGCTAGTGGGGCTGCGGTAGACATTAAAGATT	21893
TDG_ff_TG_M_f1TA_f2TG_rep_3	22437	0	CGCAGCTATTTAGGTTGCGCGGAAGCGCAACCTGAATAGCTGCGGTAGACATTAAAGATT	25087.9
TDG_TG_f1TT_f2GCTG_rep_8	23867	0	CGCAGCTCTTTGCTGCTCGCGGAAGCGAGCAGCGAAGAGCTGCGGTAGACATTAAAGATT	26686.8
TDG_TG_f1CT_f2TTAT_rep_2	18870	0	CGCAGCTCCTTTTATCTCGCGGAAGCGAGATAAGAGGAGCTGCGGTAGACATTAAAGATT	21033.8
TDG_TG_L_M1CC_M2CC_rep_6	18718	0	CGCAGCTCCCTCAGCCTCGCGGAAGCGAGGCTCGCGGAGCTGCGGTAGACATTAAAGATT	20940.4
TDG_TG_f1GC_f2CCCG_rep_3	19705	0	CGCAGCTCGCTCCCGCTCGCGGAAGCGAGCGGGGGCGAGCTGCGGTAGACATTAAAGATT	21897
TDG_TG_L_M1AG_M2GG_rep_9	19814	0	CGCAGCTCCATGAGCCTCGCGGAAGCGAGGCTGGGGGAGCTGCGGTAGACATTAAAGATT	22044.5
TDG_ff_TG_L_f1TT_f2CC_rep_5	20070	0	CGCAGCTTCATTAGCCCCGCGGAAGCGGGGCTAGTGAAGCTGCGGTAGACATTAAAGATT	22302.6
TDG_TG_f1AA_f2TAGT_rep_7	19435	0	CGCAGCTCAATTAGTCTCGCGGAAGCGAGACTAGTTGAGCTGCGGTAGACATTAAAGATT	21521.2
TDG_ff_TG_H_f1CG_f2CC_rep_4	27698	0	CGCAGCCGAGTGTATCCCGCGGAAGCGGGATACGCTCGGCTGCGGTAGACATTAAAGATT	30630.3
TDG_TG_M_M1CA_M2AA_rep_6	19169	0	CGCAGCTCTCTAGGTCTCGCGGAAGCGAGACCAGAAGAGCTGCGGTAGACATTAAAGATT	21168.2
TDG_TG_f1GA_f2AGTT_rep_10	22048	0	CGCAGCTCGATAGTTCTCGCGGAAGCGAGAACTGTCGAGCTGCGGTAGACATTAAAGATT	24207.9
TDG_TG_f1GT_f2TGGA_rep_3	19324	0	CGCAGCTCGTTTGGACTCGCGGAAGCGAGTCCAGACGAGCTGCGGTAGACATTAAAGATT	21217
TDG_TG_f1TC_f2ATCT_rep_3	21563	0	CGCAGCTCTCTATCTCTCGCGGAAGCGAGAGATGGAGAGCTGCGGTAGACATTAAAGATT	23802.4
TDG_TG_f1GT_f2GACT_rep_10	23277	0	CGCAGCTCGTTGACTCTCGCGGAAGCGAGAGTCGACGAGCTGCGGTAGACATTAAAGATT	25731
TDG_ff_TA_H_f1GA_f2CT_rep_3	19924	0	CGCAGCGAAGTGTATCTCGCGGAAGCGAGATACACTTCGCTGCGGTAGACATTAAAGATT	21872.3
TDG_TG_f1CA_f2AGCC_rep_10	23203	0	CGCAGCTCCATAGCCCTCGCGGAAGCGAGGGCTGTGGAGCTGCGGTAGACATTAAAGATT	25452.4
TDG_TG_f1AA_f2GCGC_rep_3	26096	0	CGCAGCTCAATGCGCCTCGCGGAAGCGAGGCGCGTTGAGCTGCGGTAGACATTAAAGATT	28897.2
TDG_TG_f1GA_f2TGTC_rep_6	19532	0	CGCAGCTCGATTGTCCTCGCGGAAGCGAGGACAGTCGAGCTGCGGTAGACATTAAAGATT	21487.8
TDG_TG_f1TA_f2AGCT_rep_7	23549	0	CGCAGCTCTATAGCTCTCGCGGAAGCGAGAGCTGTAGAGCTGCGGTAGACATTAAAGATT	25824.8
TDG_TG_f1AG_f2TGCC_rep_5	20437	0	CGCAGCTCAGTTGCCCTCGCGGAAGCGAGGGCAGCTGAGCTGCGGTAGACATTAAAGATT	22527.9
TDG_TG_f1AG_f2TATT_rep_2	19257	0	CGCAGCTCAGTTATTCTCGCGGAAGCGAGAATAGCTGAGCTGCGGTAGACATTAAAGATT	21246.5
TDG_TG_f1TA_f2GTAT_rep_8	27081	0	CGCAGCTCTATGTATCTCGCGGAAGCGAGATACGTAGAGCTGCGGTAGACATTAAAGATT	29992.8
TDG_TG_f1GT_f2GGCA_rep_9	24090	0	CGCAGCTCGTTGGCACTCGCGGAAGCGAGTGCCGACGAGCTGCGGTAGACATTAAAGATT	26600.5
TDG_TG_f1CG_f2TACA_rep_3	18771	0	CGCAGCTCCGTTACACTCGCGGAAGCGAGTGTAGCGGAGCTGCGGTAGACATTAAAGATT	20853.2
TDG_TG_f1GT_f2GAAC_rep_3	24028	0	CGCAGCTCGTTGAACCTCGCGGAAGCGAGGTTCGACGAGCTGCGGTAGACATTAAAGATT	26849.1
TDG_ff_TA_H_f1CC_f2GA_rep_10	20454	0	CGCAGCCCAGTGTATGACGCGGAAGCGTCATACACTGGGCTGCGGTAGACATTAAAGATT	22863
TDG_ff_TG_L_f1CG_f2TT_rep_5	22216	0	CGCAGCCGCATTAGCTTCGCGGAAGCGAAGCTAGTGCGGCTGCGGTAGACATTAAAGATT	24778.7
TDG_TG_f1TG_f2ACTG_rep_6	22410	0	CGCAGCTCTGTACTGCTCGCGGAAGCGAGCAGTGCAGAGCTGCGGTAGACATTAAAGATT	24941
TDG_TG_f1AA_f2TATA_rep_4	19696	0	CGCAGCTCAATTATACTCGCGGAAGCGAGTATAGTTGAGCTGCGGTAGACATTAAAGATT	21860.8
TDG_TG_f1AT_f2CCTC_rep_4	19541	0	CGCAGCTCATTCCTCCTCGCGGAAGCGAGGAGGGATGAGCTGCGGTAGACATTAAAGATT	21675.1
TDG_TG_f1TG_f2GGCT_rep_4	25576	0	CGCAGCTCTGTGGCTCTCGCGGAAGCGAGAGCCGCAGAGCTGCGGTAGACATTAAAGATT	28412.4
TDG_TG_f1TT_f2TTAG_rep_4	19072	0	CGCAGCTCTTTTTAGCTCGCGGAAGCGAGCTAAGAAGAGCTGCGGTAGACATTAAAGATT	20952
TDG_TG_f1TT_f2AAGC_rep_7	20291	0	CGCAGCTCTTTAAGCCTCGCGGAAGCGAGGCTTGAAGAGCTGCGGTAGACATTAAAGATT	22291.2
TDG_TG_f1CA_f2GTAA_rep_9	27076	0	CGCAGCTCCATGTAACTCGCGGAAGCGAGTTACGTGGAGCTGCGGTAGACATTAAAGATT	29897.7
TDG_TG_L_M1GT_M2GG_rep_4	23092	0	CGCAGCTCCGTGAGCCTCGCGGAAGCGAGGCTGGTGGAGCTGCGGTAGACATTAAAGATT	25118.1
TDG_TG_f1CA_f2GAGC_rep_7	25107	0	CGCAGCTCCATGAGCCTCGCGGAAGCGAGGCTCGTGGAGCTGCGGTAGACATTAAAGATT	27455.7
TDG_ff_TG_L_f1TT_f2AC_rep_5	20429	0	CGCAGCTTCATTAGCACCGCGGAAGCGGTGCTAGTGAAGCTGCGGTAGACATTAAAGATT	21998.5
TDG_TG_f1AT_f2TTTA_rep_1	19809	0	CGCAGCTCATTTTTACTCGCGGAAGCGAGTAAAGATGAGCTGCGGTAGACATTAAAGATT	21662.1
TDG_CG_f1CC_f2TATT_rep_4	20086	0	CGCAGCTCCCCTATTCTCGCGGAAGCGAGAATAGGGGAGCTGCGGTAGACATTAAAGATT	21946.7
TDG_TG_H_M1GA_M2GA_rep_6	22973	0	CGCAGCTCAGTGTATCTCGCGGAAGCGAGATAAGATGAGCTGCGGTAGACATTAAAGATT	25111.6
TDG_TG_L_M1CA_M2CA_rep_3	19673	0	CGCAGCTCCCTCAGCCTCGCGGAAGCGAGGCTAGAGGAGCTGCGGTAGACATTAAAGATT	21513.4
TDG_ff_TG_H_f1AA_f2GT_rep_2	29149	0	CGCAGCAAAGTGTATGTCGCGGAAGCGACATACGCTTTGCTGCGGTAGACATTAAAGATT	31834.6
TDG_hyb_TG_f1AT_f2CCCG_rep_9	20626	0	TATTATTTATCGCAGATTCCCGCGCGGAAGCGCGGGGATCTGCGGTAGACATTAAAGATT	22526.4
TDG_TG_f1GG_f2CGTT_rep_5	22928	0	CGCAGCTCGGTCGTTCTCGCGGAAGCGAGAACGGCCGAGCTGCGGTAGACATTAAAGATT	24999.5
TDG_ff_TG_H_f1AG_f2CC_rep_4	30608	0	CGCAGCAGAGTGTATCCCGCGGAAGCGGGATACGCTCTGCTGCGGTAGACATTAAAGATT	33232.5
TDG_ff_TA_H_f1TG_f2CG_rep_6	21120	0	CGCAGCTGAGTGTATCGCGCGGAAGCGCGATACACTCAGCTGCGGTAGACATTAAAGATT	22852.8
TDG_TG_f1TC_f2ACCC_rep_6	20741	0	CGCAGCTCTCTACCCCTCGCGGAAGCGAGGGGTGGAGAGCTGCGGTAGACATTAAAGATT	22514.8
TDG_TG_f1TC_f2ATCT_rep_1	21866	0	CGCAGCTCTCTATCTCTCGCGGAAGCGAGAGATGGAGAGCTGCGGTAGACATTAAAGATT	23869.6
TDG_ff_TA_H_f1TC_f2TT_rep_3	20331	0	CGCAGCTCAGTGTATTTCGCGGAAGCGAAATACACTGAGCTGCGGTAGACATTAAAGATT	22186.8
TDG_TG_f1GC_f2CTCA_rep_6	21273	0	CGCAGCTCGCTCTCACTCGCGGAAGCGAGTGAGGGCGAGCTGCGGTAGACATTAAAGATT	23206.2
TDG_TG_f1TG_f2GTGA_rep_4	26197	0	CGCAGCTCTGTGTGACTCGCGGAAGCGAGTCACGCAGAGCTGCGGTAGACATTAAAGATT	28361.3
TDG_TG_f1TT_f2TAAC_rep_6	19092	0	CGCAGCTCTTTTAACCTCGCGGAAGCGAGGTTAGAAGAGCTGCGGTAGACATTAAAGATT	20680.2
TDG_ff_TG_M_f1GT_f2AA_rep_8	22667	0	CGCAGCGTTTTAGGTAACGCGGAAGCGTTACCTGAAACGCTGCGGTAGACATTAAAGATT	24489.8
TDG_TG_f1TT_f2AGGT_rep_2	22310	0	CGCAGCTCTTTAGGTCTCGCGGAAGCGAGACCTGAAGAGCTGCGGTAGACATTAAAGATT	24118.4
TDG_TG_f1CG_f2ATGA_rep_1	20776	0	CGCAGCTCCGTATGACTCGCGGAAGCGAGTCATGCGGAGCTGCGGTAGACATTAAAGATT	22477
TDG_TG_f1CT_f2GAGA_rep_7	24150	0	CGCAGCTCCTTGAGACTCGCGGAAGCGAGTCTCGAGGAGCTGCGGTAGACATTAAAGATT	26034.9
TDG_TG_f1GA_f2GTTG_rep_10	26260	0	CGCAGCTCGATGTTGCTCGCGGAAGCGAGCAACGTCGAGCTGCGGTAGACATTAAAGATT	28354.9
TDG_TG_f1GC_f2GGAG_rep_7	24141	0	CGCAGCTCGCTGGAGCTCGCGGAAGCGAGCTCCGGCGAGCTGCGGTAGACATTAAAGATT	25680.1
TDG_TG_f1GC_f2CGAG_rep_2	20010	0	CGCAGCTCGCTCGAGCTCGCGGAAGCGAGCTCGGGCGAGCTGCGGTAGACATTAAAGATT	21204.2
TDG_ff_TG_H_f1TT_f2CA_rep_5	27805	0	CGCAGCTTAGTGTATCACGCGGAAGCGTGATACGCTAAGCTGCGGTAGACATTAAAGATT	29487.5
TDG_ff_TG_H_f1GG_f2TG_rep_4	28631	0	CGCAGCGGAGTGTATTGCGCGGAAGCGCAATACGCTCCGCTGCGGTAGACATTAAAGATT	30520.1
TDG_TG_f1GG_f2CGCT_rep_9	24875	0	CGCAGCTCGGTCGCTCTCGCGGAAGCGAGAGCGGCCGAGCTGCGGTAGACATTAAAGATT	26560
TDG_TG_f1AA_f2GAGA_rep_4	26077	0	CGCAGCTCAATGAGACTCGCGGAAGCGAGTCTCGTTGAGCTGCGGTAGACATTAAAGATT	27383.7
TDG_TG_f1TT_f2CGGC_rep_8	20159	0	CGCAGCTCTTTCGGCCTCGCGGAAGCGAGGCCGGAAGAGCTGCGGTAGACATTAAAGATT	21091
TDG_TG_f1TC_f2AGCT_rep_2	22530	0	CGCAGCTCTCTAGCTCTCGCGGAAGCGAGAGCTGGAGAGCTGCGGTAGACATTAAAGATT	23788.8
TDG_TG_f1AA_f2GCCG_rep_10	26701	0	CGCAGCTCAATGCCGCTCGCGGAAGCGAGCGGCGTTGAGCTGCGGTAGACATTAAAGATT	28157.1
TDG_TG_f1CG_f2CTAT_rep_6	21019	0	CGCAGCTCCGTCTATCTCGCGGAAGCGAGATAGGCGGAGCTGCGGTAGACATTAAAGATT	22111
TDG_TG_M_M1CG_M2AT_rep_8	22085	0	CGCAGCTCTCTAGGTCTCGCGGAAGCGAGACCTGGAGAGCTGCGGTAGACATTAAAGATT	23191.7
TDG_TG_f1TA_f2CCGG_rep_9	20728	0	CGCAGCTCTATCCGGCTCGCGGAAGCGAGCCGGGTAGAGCTGCGGTAGACATTAAAGATT	21648
TDG_ff_TG_H_f1GG_f2AC_rep_6	29290	0	CGCAGCGGAGTGTATACCGCGGAAGCGGTATACGCTCCGCTGCGGTAGACATTAAAGATT	30479
TDG_TG_L_M1GG_M2AA_rep_10	20146	0	CGCAGCTCCGTAAGCCTCGCGGAAGCGAGGCTAGGGGAGCTGCGGTAGACATTAAAGATT	20910.9
TDG_TG_f1GC_f2TGGA_rep_8	20354	0	CGCAGCTCGCTTGGACTCGCGGAAGCGAGTCCAGGCGAGCTGCGGTAGACATTAAAGATT	20873.6
TDG_ff_TA_H_f1AC_f2TT_rep_3	22737	0	CGCAGCACAGTGTATTTCGCGGAAGCGAAATACACTGTGCTGCGGTAGACATTAAAGATT	23306.4
TDG_TG_f1TT_f2CTCC_rep_9	21362	0	CGCAGCTCTTTCTCCCTCGCGGAAGCGAGGGAGGAAGAGCTGCGGTAGACATTAAAGATT	21851
TDG_TG_f1AG_f2CAGT_rep_8	22454	0	CGCAGCTCAGTCAGTCTCGCGGAAGCGAGACTGGCTGAGCTGCGGTAGACATTAAAGATT	23018.8
TDG_ff_TG_H_f1AG_f2GC_rep_6	31818	0	CGCAGCAGAGTGTATGCCGCGGAAGCGGCATACGCTCTGCTGCGGTAGACATTAAAGATT	32579.5
TDG_TG_f1CT_f2CCCC_rep_1	21476	0	CGCAGCTCCTTCCCCCTCGCGGAAGCGAGGGGGGAGGAGCTGCGGTAGACATTAAAGATT	21942.5
TDG_hyb_TG_f1AA_f2AGCG_rep_9	24703	0	TATTATTTATCGCAGAATAGCGCGCGGAAGCGCGCTGTTCTGCGGTAGACATTAAAGATT	25276.7
TDG_TG_f1AT_f2GAAC_rep_5	26853	0	CGCAGCTCATTGAACCTCGCGGAAGCGAGGTTCGATGAGCTGCGGTAGACATTAAAGATT	27538.6
TDG_TG_f1GA_f2ACGC_rep_1	22624	0	CGCAGCTCGATACGCCTCGCGGAAGCGAGGCGTGTCGAGCTGCGGTAGACATTAAAGATT	23095.5
TDG_ff_TG_H_f1GT_f2CG_rep_6	29162	0	CGCAGCGTAGTGTATCGCGCGGAAGCGCGATACGCTACGCTGCGGTAGACATTAAAGATT	29769.7
TDG_TG_f1AC_f2AGCA_rep_8	24204	0	CGCAGCTCACTAGCACTCGCGGAAGCGAGTGCTGGTGAGCTGCGGTAGACATTAAAGATT	24736.7
TDG_TG_f1CA_f2CCGT_rep_5	20508	0	CGCAGCTCCATCCGTCTCGCGGAAGCGAGACGGGTGGAGCTGCGGTAGACATTAAAGATT	21010.2
TDG_hyb_TG_f1GT_f2AGAC_rep_7	23002	0	TATTATTTATCGCAGGTTAGACCGCGGAAGCGGTCTGACCTGCGGTAGACATTAAAGATT	23660
TDG_TG_f1GA_f2CAGA_rep_7	21381	0	CGCAGCTCGATCAGACTCGCGGAAGCGAGTCTGGTCGAGCTGCGGTAGACATTAAAGATT	22034.3
TDG_TG_f1CA_f2TGCA_rep_4	21700	0	CGCAGCTCCATTGCACTCGCGGAAGCGAGTGCAGTGGAGCTGCGGTAGACATTAAAGATT	22587.9
TDG_TG_f1GA_f2GGCT_rep_2	27359	0	CGCAGCTCGATGGCTCTCGCGGAAGCGAGAGCCGTCGAGCTGCGGTAGACATTAAAGATT	28611.8
TDG_TG_f1GT_f2CGAC_rep_7	21573	0	CGCAGCTCGTTCGACCTCGCGGAAGCGAGGTCGGACGAGCTGCGGTAGACATTAAAGATT	22562.9
TDG_TG_f1CA_f2CTTT_rep_10	20933	0	CGCAGCTCCATCTTTCTCGCGGAAGCGAGAAAGGTGGAGCTGCGGTAGACATTAAAGATT	21957.6
TDG_TF_RUNX1_rep_7	22361	0	CGCAGTGTTGCGGTTCTCGCGGAAGCGAGAACCGCAACACTGCGGTAGACATTAAAGATT	23366.4
TDG_ff_TG_M_f1CC_f2AC_rep_5	24345	0	CGCAGCCCTTTAGGTACCGCGGAAGCGGTACCTGAAGGGCTGCGGTAGACATTAAAGATT	25601.3
TDG_TG_H_M1CA_M2AC_rep_8	21038	0	CGCAGCTCACTATATCTCGCGGAAGCGAGATACGATGAGCTGCGGTAGACATTAAAGATT	22216.9
TDG_TG_f1AT_f2AAGA_rep_3	22729	0	CGCAGCTCATTAAGACTCGCGGAAGCGAGTCTTGATGAGCTGCGGTAGACATTAAAGATT	24079
TDG_TG_f1GT_f2GGTT_rep_6	26530	0	CGCAGCTCGTTGGTTCTCGCGGAAGCGAGAACCGACGAGCTGCGGTAGACATTAAAGATT	28007.3
TDG_TG_f1TA_f2CATC_rep_3	20646	0	CGCAGCTCTATCATCCTCGCGGAAGCGAGGATGGTAGAGCTGCGGTAGACATTAAAGATT	21724.9
TDG_TG_f1TT_f2TCAC_rep_6	19865	0	CGCAGCTCTTTTCACCTCGCGGAAGCGAGGTGAGAAGAGCTGCGGTAGACATTAAAGATT	20978.2
TDG_TG_f1CC_f2GTTT_rep_6	26070	0	CGCAGCTCCCTGTTTCTCGCGGAAGCGAGAAACGGGGAGCTGCGGTAGACATTAAAGATT	27361.8
TDG_TG_f1CA_f2CATG_rep_1	20951	0	CGCAGCTCCATCATGCTCGCGGAAGCGAGCATGGTGGAGCTGCGGTAGACATTAAAGATT	21947.3
TDG_TG_L_M1CG_M2AG_rep_4	21030	0	CGCAGCTCCCTAAGCCTCGCGGAAGCGAGGCTGGGGGAGCTGCGGTAGACATTAAAGATT	21975.5
TDG_TG_f1TG_f2CGCC_rep_5	25396	0	CGCAGCTCTGTCGCCCTCGCGGAAGCGAGGGCGGCAGAGCTGCGGTAGACATTAAAGATT	26676.8
TDG_TG_f1AC_f2GGGG_rep_8	27573	0	CGCAGCTCACTGGGGCTCGCGGAAGCGAGCCCCGGTGAGCTGCGGTAGACATTAAAGATT	28836.9
TDG_TG_f1CA_f2AAGG_rep_1	22288	0	CGCAGCTCCATAAGGCTCGCGGAAGCGAGCCTTGTGGAGCTGCGGTAGACATTAAAGATT	23173.4
TDG_TG_f1TC_f2CGAC_rep_6	21687	0	CGCAGCTCTCTCGACCTCGCGGAAGCGAGGTCGGGAGAGCTGCGGTAGACATTAAAGATT	22525.3
TDG_ff_TG_H_f1TC_f2TA_rep_7	29802	0	CGCAGCTCAGTGTATTACGCGGAAGCGTAATACGCTGAGCTGCGGTAGACATTAAAGATT	30977.1
TDG_TG_f1CC_f2TTCA_rep_5	21122	0	CGCAGCTCCCTTTCACTCGCGGAAGCGAGTGAAGGGGAGCTGCGGTAGACATTAAAGATT	21952.4
TDG_TG_f1GA_f2CCCA_rep_6	21548	0	CGCAGCTCGATCCCACTCGCGGAAGCGAGTGGGGTCGAGCTGCGGTAGACATTAAAGATT	22136.5
TDG_TG_f1CT_f2GTTC_rep_10	26558	0	CGCAGCTCCTTGTTCCTCGCGGAAGCGAGGAACGAGGAGCTGCGGTAGACATTAAAGATT	27046.1
TDG_TG_f1AC_f2CCCC_rep_2	22760	0	CGCAGCTCACTCCCCCTCGCGGAAGCGAGGGGGGGTGAGCTGCGGTAGACATTAAAGATT	23236.3
TDG_TG_M_M1GC_M2GC_rep_10	27697	0	CGCAGCTCTGTGGGTCTCGCGGAAGCGAGACCCGCAGAGCTGCGGTAGACATTAAAGATT	28318.2
TDG_TG_f1GC_f2TCCA_rep_7	20730	0	CGCAGCTCGCTTCCACTCGCGGAAGCGAGTGGAGGCGAGCTGCGGTAGACATTAAAGATT	21372.3
TDG_ff_TG_H_f1TT_f2AG_rep_3	29561	0	CGCAGCTTAGTGTATAGCGCGGAAGCGCTATACGCTAAGCTGCGGTAGACATTAAAGATT	30567.4
TDG_TG_H_M1GC_M2AC_rep_2	26519	0	CGCAGCTCAGTATATCTCGCGGAAGCGAGATACGCTGAGCTGCGGTAGACATTAAAGATT	27360.9
TDG_ff_TG_M_f1AC_f2TC_rep_10	25720	0	CGCAGCACTTTAGGTTCCGCGGAAGCGGAACCTGAAGTGCTGCGGTAGACATTAAAGATT	26521.5
TDG_TG_f1CG_f2GGTT_rep_9	27408	0	CGCAGCTCCGTGGTTCTCGCGGAAGCGAGAACCGCGGAGCTGCGGTAGACATTAAAGATT	27980.4
TDG_TG_f1CA_f2ATTA_rep_9	22840	0	CGCAGCTCCATATTACTCGCGGAAGCGAGTAATGTGGAGCTGCGGTAGACATTAAAGATT	23423.1
TDG_TG_H_M1AC_M2CC_rep_6	21073	0	CGCAGCTCAATCTATCTCGCGGAAGCGAGATACGCTGAGCTGCGGTAGACATTAAAGATT	21632.6
TDG_TG_H_M1AA_M2CT_rep_6	20839	0	CGCAGCTCAATCTATCTCGCGGAAGCGAGATATGATGAGCTGCGGTAGACATTAAAGATT	21349.7
TDG_ff_TA_H_f1TT_f2TT_rep_9	22264	0	CGCAGCTTAGTGTATTTCGCGGAAGCGAAATACACTAAGCTGCGGTAGACATTAAAGATT	22953.8
TDG_ff_TA_H_f1TC_f2AA_rep_8	22031	0	CGCAGCTCAGTGTATAACGCGGAAGCGTTATACACTGAGCTGCGGTAGACATTAAAGATT	22614
TDG_TF_MITF_rep_2	21698	0	CGCAGGTCACGTGACCTCGCGGAAGCGAGGTCACGTGACCTGCGGTAGACATTAAAGATT	22338.1
TDG_ff_TG_M_f1GT_f2AT_rep_6	24581	0	CGCAGCGTTTTAGGTATCGCGGAAGCGATACCTGAAACGCTGCGGTAGACATTAAAGATT	25598
TDG_ff_TA_H_f1TT_f2GA_rep_2	21926	0	CGCAGCTTAGTGTATGACGCGGAAGCGTCATACACTAAGCTGCGGTAGACATTAAAGATT	22854.3
TDG_TG_M_M1AA_M2TC_rep_6	21251	0	CGCAGCTCTATTGGTCTCGCGGAAGCGAGACCCGAAGAGCTGCGGTAGACATTAAAGATT	22414.8
TDG_ff_TG_M_f1CG_f2GT_rep_9	24548	0	CGCAGCCGTTTAGGTGTCGCGGAAGCGACACCTGAACGGCTGCGGTAGACATTAAAGATT	25790.7
TDG_TG_f1CG_f2AATC_rep_1	21849	0	CGCAGCTCCGTAATCCTCGCGGAAGCGAGGATTGCGGAGCTGCGGTAGACATTAAAGATT	22957.1
TDG_TG_f1AG_f2GCGA_rep_4	28311	0	CGCAGCTCAGTGCGACTCGCGGAAGCGAGTCGCGCTGAGCTGCGGTAGACATTAAAGATT	29667.7
TDG_TG_f1GC_f2GCCC_rep_9	25551	0	CGCAGCTCGCTGCCCCTCGCGGAAGCGAGGGGCGGCGAGCTGCGGTAGACATTAAAGATT	26445.2
TDG_TG_M_M1TG_M2CT_rep_4	20924	0	CGCAGCTCTTTCGGTCTCGCGGAAGCGAGACCTGGAGAGCTGCGGTAGACATTAAAGATT	21635.4
TDG_ff_TG_L_f1TG_f2AA_rep_2	25368	0	CGCAGCTGCATTAGCAACGCGGAAGCGTTGCTAGTGCAGCTGCGGTAGACATTAAAGATT	26248.9
TDG_TG_M_M1TA_M2TT_rep_9	20817	0	CGCAGCTCTTTTGGTCTCGCGGAAGCGAGACCTGAAGAGCTGCGGTAGACATTAAAGATT	21523.4
TDG_TG_f1AT_f2CGCC_rep_1	22853	0	CGCAGCTCATTCGCCCTCGCGGAAGCGAGGGCGGATGAGCTGCGGTAGACATTAAAGATT	23630
TDG_TG_f1AT_f2TAAA_rep_4	20657	0	CGCAGCTCATTTAAACTCGCGGAAGCGAGTTTAGATGAGCTGCGGTAGACATTAAAGATT	21373.4
TDG_TG_f1CA_f2CCAG_rep_10	21419	0	CGCAGCTCCATCCAGCTCGCGGAAGCGAGCTGGGTGGAGCTGCGGTAGACATTAAAGATT	22104.3
TDG_TG_f1AA_f2TGGT_rep_8	21407	0	CGCAGCTCAATTGGTCTCGCGGAAGCGAGACCAGTTGAGCTGCGGTAGACATTAAAGATT	22147.9
TDG_TG_f1GA_f2ACGA_rep_9	22638	0	CGCAGCTCGATACGACTCGCGGAAGCGAGTCGTGTCGAGCTGCGGTAGACATTAAAGATT	23406.2
TDG_TG_f1CA_f2AAGC_rep_1	22406	0	CGCAGCTCCATAAGCCTCGCGGAAGCGAGGCTTGTGGAGCTGCGGTAGACATTAAAGATT	22994
TDG_TG_f1CC_f2CATT_rep_6	21414	0	CGCAGCTCCCTCATTCTCGCGGAAGCGAGAATGGGGGAGCTGCGGTAGACATTAAAGATT	21975.9
TDG_TG_M_M1TA_M2CC_rep_3	20597	0	CGCAGCTCTTTCGGTCTCGCGGAAGCGAGACCCGAAGAGCTGCGGTAGACATTAAAGATT	21167.3
TDG_TG_M_M1AT_M2TG_rep_3	22898	0	CGCAGCTCTATTGGTCTCGCGGAAGCGAGACCGGTAGAGCTGCGGTAGACATTAAAGATT	23532.1
TDG_ff_TG_H_f1TA_f2CA_rep_8	29510	0	CGCAGCTAAGTGTATCACGCGGAAGCGTGATACGCTTAGCTGCGGTAGACATTAAAGATT	30266.7
TDG_TG_f1TG_f2TACT_rep_1	20842	0	CGCAGCTCTGTTACTCTCGCGGAAGCGAGAGTAGCAGAGCTGCGGTAGACATTAAAGATT	21376.4
TDG_ff_TG_L_f1TC_f2TC_rep_7	20936	0	CGCAGCTCCATTAGCTCCGCGGAAGCGGAGCTAGTGGAGCTGCGGTAGACATTAAAGATT	21663
TDG_TG_f1TG_f2GACA_rep_7	27710	0	CGCAGCTCTGTGACACTCGCGGAAGCGAGTGTCGCAGAGCTGCGGTAGACATTAAAGATT	28693.5
TDG_ff_TG_L_f1CA_f2AG_rep_8	22742	0	CGCAGCCACATTAGCAGCGCGGAAGCGCTGCTAGTGTGGCTGCGGTAGACATTAAAGATT	23570.9
TDG_TG_f1AA_f2TAAT_rep_2	21325	0	CGCAGCTCAATTAATCTCGCGGAAGCGAGATTAGTTGAGCTGCGGTAGACATTAAAGATT	22110.9
TDG_ff_TG_H_f1GT_f2TT_rep_4	30422	0	CGCAGCGTAGTGTATTTCGCGGAAGCGAAATACGCTACGCTGCGGTAGACATTAAAGATT	31543.2
TDG_TG_f1AG_f2CTAG_rep_2	25430	0	CGCAGCTCAGTCTAGCTCGCGGAAGCGAGCTAGGCTGAGCTGCGGTAGACATTAAAGATT	26348.2
TDG_TG_f1GG_f2ATCT_rep_6	25844	0	CGCAGCTCGGTATCTCTCGCGGAAGCGAGAGATGCCGAGCTGCGGTAGACATTAAAGATT	26806.5
TDG_TG_f1AT_f2GTAA_rep_7	28118	0	CGCAGCTCATTGTAACTCGCGGAAGCGAGTTACGATGAGCTGCGGTAGACATTAAAGATT	28984.1
TDG_TG_f1AA_f2TTGG_rep_9	20543	0	CGCAGCTCAATTTGGCTCGCGGAAGCGAGCCAAGTTGAGCTGCGGTAGACATTAAAGATT	21300.1
TDG_TG_f1AC_f2CGCT_rep_5	22762	0	CGCAGCTCACTCGCTCTCGCGGAAGCGAGAGCGGGTGAGCTGCGGTAGACATTAAAGATT	23658.4
TDG_ff_TG_L_f1CA_f2GG_rep_1	22179	0	CGCAGCCACATTAGCGGCGCGGAAGCGCCGCTAGTGTGGCTGCGGTAGACATTAAAGATT	22881.6
TDG_TG_f1GT_f2AGTC_rep_9	23857	0	CGCAGCTCGTTAGTCCTCGCGGAAGCGAGGACTGACGAGCTGCGGTAGACATTAAAGATT	24646.6
TDG_TG_f1TG_f2TTAC_rep_2	21123	0	CGCAGCTCTGTTTACCTCGCGGAAGCGAGGTAAGCAGAGCTGCGGTAGACATTAAAGATT	21851.7
TDG_TG_L_M1GC_M2CA_rep_1	20875	0	CGCAGCTCCGTCAGCCTCGCGGAAGCGAGGCTAGCGGAGCTGCGGTAGACATTAAAGATT	21488
TDG_ff_TG_H_f1GG_f2GC_rep_4	30563	0	CGCAGCGGAGTGTATGCCGCGGAAGCGGCATACGCTCCGCTGCGGTAGACATTAAAGATT	30797.3
TDG_TG_f1TG_f2GTCG_rep_7	28591	0	CGCAGCTCTGTGTCGCTCGCGGAAGCGAGCGACGCAGAGCTGCGGTAGACATTAAAGATT	28562
TDG_ff_TA_H_f1CA_f2TT_rep_1	22339	0	CGCAGCCAAGTGTATTTCGCGGAAGCGAAATACACTTGGCTGCGGTAGACATTAAAGATT	22281.1
TDG_ff_TG_L_f1TA_f2GT_rep_9	22365	0	CGCAGCTACATTAGCGTCGCGGAAGCGACGCTAGTGTAGCTGCGGTAGACATTAAAGATT	22318.3
TDG_TG_f1CA_f2AAGC_rep_7	22480	0	CGCAGCTCCATAAGCCTCGCGGAAGCGAGGCTTGTGGAGCTGCGGTAGACATTAAAGATT	22357.2
TDG_TG_f1TT_f2CACC_rep_4	21432	0	CGCAGCTCTTTCACCCTCGCGGAAGCGAGGGTGGAAGAGCTGCGGTAGACATTAAAGATT	21324.7
TDG_TG_f1TT_f2GCGG_rep_2	26464	0	CGCAGCTCTTTGCGGCTCGCGGAAGCGAGCCGCGAAGAGCTGCGGTAGACATTAAAGATT	26298.4
TDG_TG_f1AA_f2AGAA_rep_9	24762	0	CGCAGCTCAATAGAACTCGCGGAAGCGAGTTCTGTTGAGCTGCGGTAGACATTAAAGATT	24612.2
TDG_TG_f1AA_f2GATG_rep_8	28700	0	CGCAGCTCAATGATGCTCGCGGAAGCGAGCATCGTTGAGCTGCGGTAGACATTAAAGATT	28333.6
TDG_ff_TA_H_f1CG_f2GG_rep_6	23150	0	CGCAGCCGAGTGTATGGCGCGGAAGCGCCATACACTCGGCTGCGGTAGACATTAAAGATT	22760.4
TDG_TG_f1CA_f2AATC_rep_2	22615	0	CGCAGCTCCATAATCCTCGCGGAAGCGAGGATTGTGGAGCTGCGGTAGACATTAAAGATT	22296.5
TDG_TG_f1GG_f2ATAA_rep_10	24357	0	CGCAGCTCGGTATAACTCGCGGAAGCGAGTTATGCCGAGCTGCGGTAGACATTAAAGATT	24013.9
TDG_TG_f1AT_f2AGAT_rep_7	25872	0	CGCAGCTCATTAGATCTCGCGGAAGCGAGATCTGATGAGCTGCGGTAGACATTAAAGATT	25507.6
TDG_TG_f1AG_f2GTAC_rep_1	28909	0	CGCAGCTCAGTGTACCTCGCGGAAGCGAGGTACGCTGAGCTGCGGTAGACATTAAAGATT	28501.8
TDG_ff_TA_H_f1GG_f2TA_rep_9	22550	0	CGCAGCGGAGTGTATTACGCGGAAGCGTAATACACTCCGCTGCGGTAGACATTAAAGATT	22232.4
TDG_TG_f1GC_f2AATC_rep_5	20512	0	CGCAGCTCGCTAATCCTCGCGGAAGCGAGGATTGGCGAGCTGCGGTAGACATTAAAGATT	23177.5
TDG_TG_H_M1TG_M2AC_rep_5	19063	0	CGCAGCTCATTATATCTCGCGGAAGCGAGATACGGTGAGCTGCGGTAGACATTAAAGATT	21540.2
TDG_TG_f1AA_f2CTTA_rep_10	19714	0	CGCAGCTCAATCTTACTCGCGGAAGCGAGTAAGGTTGAGCTGCGGTAGACATTAAAGATT	22275.8
TDG_ff_TG_M_f1AG_f2TA_rep_7	25242	0	CGCAGCAGTTTAGGTTACGCGGAAGCGTAACCTGAACTGCTGCGGTAGACATTAAAGATT	28522.2
TDG_TG_f1AC_f2GCGG_rep_4	24284	0	CGCAGCTCACTGCGGCTCGCGGAAGCGAGCCGCGGTGAGCTGCGGTAGACATTAAAGATT	27465.3
TDG_TG_f1GC_f2TCGA_rep_1	19181	0	CGCAGCTCGCTTCGACTCGCGGAAGCGAGTCGAGGCGAGCTGCGGTAGACATTAAAGATT	21506.1
TDG_ff_TG_M_f1TT_f2GG_rep_10	21510	0	CGCAGCTTTTTAGGTGGCGCGGAAGCGCCACCTGAAAAGCTGCGGTAGACATTAAAGATT	24106
TDG_TG_f1TC_f2GACA_rep_10	23691	0	CGCAGCTCTCTGACACTCGCGGAAGCGAGTGTCGGAGAGCTGCGGTAGACATTAAAGATT	26528.9
TDG_ff_TG_L_f1GA_f2AC_rep_9	23184	0	CGCAGCGACATTAGCACCGCGGAAGCGGTGCTAGTGTCGCTGCGGTAGACATTAAAGATT	25941.5
TDG_TG_f1CG_f2CCCA_rep_5	20365	0	CGCAGCTCCGTCCCACTCGCGGAAGCGAGTGGGGCGGAGCTGCGGTAGACATTAAAGATT	22771.1
TDG_ff_TA_H_f1CG_f2CG_rep_10	21149	0	CGCAGCCGAGTGTATCGCGCGGAAGCGCGATACACTCGGCTGCGGTAGACATTAAAGATT	23647.7
TDG_TG_f1TA_f2AGTT_rep_6	22245	0	CGCAGCTCTATAGTTCTCGCGGAAGCGAGAACTGTAGAGCTGCGGTAGACATTAAAGATT	24795.8
TDG_ff_TG_H_f1CG_f2AG_rep_3	28007	0	CGCAGCCGAGTGTATAGCGCGGAAGCGCTATACGCTCGGCTGCGGTAGACATTAAAGATT	30931.5
TDG_TG_f1AA_f2GGGG_rep_7	26811	0	CGCAGCTCAATGGGGCTCGCGGAAGCGAGCCCCGTTGAGCTGCGGTAGACATTAAAGATT	29851.7
TDG_TG_M_M1GC_M2CT_rep_3	22754	0	CGCAGCTCTGTCGGTCTCGCGGAAGCGAGACCTGCAGAGCTGCGGTAGACATTAAAGATT	25455.6
TDG_TA_f1TT_f2ACGA_rep_5	19308	0	CGCAGCTCTTTACGACTCGCGGAAGCGAGTCGTAAAGAGCTGCGGTAGACATTAAAGATT	21455.9
TDG_TG_L_M1AA_M2TA_rep_7	19167	0	CGCAGCTCCATTAGCCTCGCGGAAGCGAGGCTAGAGGAGCTGCGGTAGACATTAAAGATT	21324.7
TDG_TG_f1AT_f2TTCC_rep_2	20149	0	CGCAGCTCATTTTCCCTCGCGGAAGCGAGGGAAGATGAGCTGCGGTAGACATTAAAGATT	22390.4
TDG_ff_TG_M_f1GT_f2TC_rep_3	22210	0	CGCAGCGTTTTAGGTTCCGCGGAAGCGGAACCTGAAACGCTGCGGTAGACATTAAAGATT	24594
TDG_TG_f1GT_f2AGCC_rep_2	22835	0	CGCAGCTCGTTAGCCCTCGCGGAAGCGAGGGCTGACGAGCTGCGGTAGACATTAAAGATT	25252.4
TDG_ff_TG_H_f1AG_f2GC_rep_10	30258	0	CGCAGCAGAGTGTATGCCGCGGAAGCGGCATACGCTCTGCTGCGGTAGACATTAAAGATT	33413.7
TDG_TG_f1AA_f2GACT_rep_5	26016	0	CGCAGCTCAATGACTCTCGCGGAAGCGAGAGTCGTTGAGCTGCGGTAGACATTAAAGATT	28564.6
TDG_TG_f1GT_f2GTTT_rep_10	24398	0	CGCAGCTCGTTGTTTCTCGCGGAAGCGAGAAACGACGAGCTGCGGTAGACATTAAAGATT	26788.1
TDG_TG_f1GA_f2CGCA_rep_4	21821	0	CGCAGCTCGATCGCACTCGCGGAAGCGAGTGCGGTCGAGCTGCGGTAGACATTAAAGATT	24087.2
TDG_TG_f1TT_f2TTTC_rep_7	18900	0	CGCAGCTCTTTTTTCCTCGCGGAAGCGAGGAAAGAAGAGCTGCGGTAGACATTAAAGATT	20892.6
TDG_TG_f1AC_f2CTTG_rep_5	19469	0	CGCAGCTCACTCTTGCTCGCGGAAGCGAGCAAGGGTGAGCTGCGGTAGACATTAAAGATT	21356.4
TDG_TG_H_M1AT_M2GG_rep_2	25886	0	CGCAGCTCAATGTATCTCGCGGAAGCGAGATAGGTTGAGCTGCGGTAGACATTAAAGATT	28664.6
TDG_TG_f1GC_f2CATT_rep_7	19564	0	CGCAGCTCGCTCATTCTCGCGGAAGCGAGAATGGGCGAGCTGCGGTAGACATTAAAGATT	21523
TDG_TG_f1GT_f2CCCC_rep_8	19971	0	CGCAGCTCGTTCCCCCTCGCGGAAGCGAGGGGGGACGAGCTGCGGTAGACATTAAAGATT	21901
TDG_TG_f1CA_f2TCGA_rep_10	19559	0	CGCAGCTCCATTCGACTCGCGGAAGCGAGTCGAGTGGAGCTGCGGTAGACATTAAAGATT	21560.1
TDG_TG_f1AG_f2TTGA_rep_4	19659	0	CGCAGCTCAGTTTGACTCGCGGAAGCGAGTCAAGCTGAGCTGCGGTAGACATTAAAGATT	21690
TDG_TG_f1TT_f2ATTG_rep_2	20660	0	CGCAGCTCTTTATTGCTCGCGGAAGCGAGCAATGAAGAGCTGCGGTAGACATTAAAGATT	22881.4
TDG_TG_H_M1CC_M2TT_rep_9	19077	0	CGCAGCTCACTTTATCTCGCGGAAGCGAGATATGCTGAGCTGCGGTAGACATTAAAGATT	21065.1
TDG_TG_f1CT_f2GACT_rep_5	24119	0	CGCAGCTCCTTGACTCTCGCGGAAGCGAGAGTCGAGGAGCTGCGGTAGACATTAAAGATT	26794.5
TDG_TG_f1CA_f2GAGA_rep_9	25348	0	CGCAGCTCCATGAGACTCGCGGAAGCGAGTCTCGTGGAGCTGCGGTAGACATTAAAGATT	28324.1
TDG_TG_H_M1TT_M2AA_rep_2	18965	0	CGCAGCTCATTATATCTCGCGGAAGCGAGATAAGTTGAGCTGCGGTAGACATTAAAGATT	21198.7
TDG_TG_f1TC_f2TGGA_rep_8	19281	0	CGCAGCTCTCTTGGACTCGCGGAAGCGAGTCCAGGAGAGCTGCGGTAGACATTAAAGATT	21505.1
TDG_MM_CC_f1AG_f2GTCG_rep_2	19782	0	CGCAGCTCAGCGTCGCTCGCGGAAGCGAGCGACCCTGAGCTGCGGTAGACATTAAAGATT	22016.2
TDG_TG_L_M1CT_M2AT_rep_5	19302	0	CGCAGCTCCCTAAGCCTCGCGGAAGCGAGGCTTGTGGAGCTGCGGTAGACATTAAAGATT	21423.5
TDG_TG_f1TT_f2AAGT_rep_1	20333	0	CGCAGCTCTTTAAGTCTCGCGGAAGCGAGACTTGAAGAGCTGCGGTAGACATTAAAGATT	22588
TDG_TG_f1CT_f2TGCA_rep_8	19970	0	CGCAGCTCCTTTGCACTCGCGGAAGCGAGTGCAGAGGAGCTGCGGTAGACATTAAAGATT	21938.5
TDG_TG_f1TA_f2ACAC_rep_2	21015	0	CGCAGCTCTATACACCTCGCGGAAGCGAGGTGTGTAGAGCTGCGGTAGACATTAAAGATT	23086.5
TDG_TG_f1CA_f2CTTG_rep_2	19679	0	CGCAGCTCCATCTTGCTCGCGGAAGCGAGCAAGGTGGAGCTGCGGTAGACATTAAAGATT	21729.8
TDG_TG_f1CA_f2CGAT_rep_2	20684	0	CGCAGCTCCATCGATCTCGCGGAAGCGAGATCGGTGGAGCTGCGGTAGACATTAAAGATT	22498.8
TDG_TG_f1AC_f2TACA_rep_2	19433	0	CGCAGCTCACTTACACTCGCGGAAGCGAGTGTAGGTGAGCTGCGGTAGACATTAAAGATT	21250.9
TDG_TG_f1GT_f2GCTC_rep_5	24474	0	CGCAGCTCGTTGCTCCTCGCGGAAGCGAGGAGCGACGAGCTGCGGTAGACATTAAAGATT	26354.2
TDG_ff_TG_L_f1AT_f2CC_rep_8	22188	0	CGCAGCATCATTAGCCCCGCGGAAGCGGGGCTAGTGATGCTGCGGTAGACATTAAAGATT	24263.6
TDG_ff_TG_L_f1GC_f2AG_rep_6	22976	0	CGCAGCGCCATTAGCAGCGCGGAAGCGCTGCTAGTGGCGCTGCGGTAGACATTAAAGATT	25104.5
TDG_TG_f1AA_f2AGAC_rep_7	24688	0	CGCAGCTCAATAGACCTCGCGGAAGCGAGGTCTGTTGAGCTGCGGTAGACATTAAAGATT	26986.3
TDG_TG_f1CA_f2TGAA_rep_3	20144	0	CGCAGCTCCATTGAACTCGCGGAAGCGAGTTCAGTGGAGCTGCGGTAGACATTAAAGATT	22028.4
TDG_ff_TG_L_f1TA_f2TG_rep_3	20163	0	CGCAGCTACATTAGCTGCGCGGAAGCGCAGCTAGTGTAGCTGCGGTAGACATTAAAGATT	22020.7
TDG_TG_L_M1AA_M2CG_rep_5	19920	0	CGCAGCTCCATCAGCCTCGCGGAAGCGAGGCTGGAGGAGCTGCGGTAGACATTAAAGATT	21755.3
TDG_TG_f1CT_f2GCTT_rep_10	24665	0	CGCAGCTCCTTGCTTCTCGCGGAAGCGAGAAGCGAGGAGCTGCGGTAGACATTAAAGATT	26893.4
TDG_ff_TA_H_f1AC_f2AA_rep_3	22385	0	CGCAGCACAGTGTATAACGCGGAAGCGTTATACACTGTGCTGCGGTAGACATTAAAGATT	24304.4
TDG_TG_f1GG_f2ACGA_rep_1	22684	0	CGCAGCTCGGTACGACTCGCGGAAGCGAGTCGTGCCGAGCTGCGGTAGACATTAAAGATT	24545.1
TDG_TG_f1CC_f2CCAG_rep_1	20470	0	CGCAGCTCCCTCCAGCTCGCGGAAGCGAGCTGGGGGGAGCTGCGGTAGACATTAAAGATT	22220.6
TDG_TG_f1GA_f2GTGC_rep_8	26122	0	CGCAGCTCGATGTGCCTCGCGGAAGCGAGGCACGTCGAGCTGCGGTAGACATTAAAGATT	28515.6
TDG_TG_H_M1CG_M2GG_rep_2	24531	0	CGCAGCTCACTGTATCTCGCGGAAGCGAGATAGGGTGAGCTGCGGTAGACATTAAAGATT	26770.1
TDG_ff_TG_L_f1AT_f2TC_rep_3	21755	0	CGCAGCATCATTAGCTCCGCGGAAGCGGAGCTAGTGATGCTGCGGTAGACATTAAAGATT	23732
TDG_ff_TG_H_f1AA_f2TA_rep_2	28844	0	CGCAGCAAAGTGTATTACGCGGAAGCGTAATACGCTTTGCTGCGGTAGACATTAAAGATT	31226.9
TDG_TG_f1AA_f2GGCT_rep_1	26901	0	CGCAGCTCAATGGCTCTCGCGGAAGCGAGAGCCGTTGAGCTGCGGTAGACATTAAAGATT	29138.7
TDG_TG_f1AA_f2CACC_rep_5	20487	0	CGCAGCTCAATCACCCTCGCGGAAGCGAGGGTGGTTGAGCTGCGGTAGACATTAAAGATT	22134.5
TDG_TG_f1AG_f2TCTT_rep_8	20259	0	CGCAGCTCAGTTCTTCTCGCGGAAGCGAGAAGAGCTGAGCTGCGGTAGACATTAAAGATT	21901.1
TDG_TG_f1TG_f2GCTT_rep_1	26030	0	CGCAGCTCTGTGCTTCTCGCGGAAGCGAGAAGCGCAGAGCTGCGGTAGACATTAAAGATT	28161.1
TDG_TG_f1GC_f2GTTC_rep_8	25014	0	CGCAGCTCGCTGTTCCTCGCGGAAGCGAGGAACGGCGAGCTGCGGTAGACATTAAAGATT	26966.4
TDG_TG_f1GG_f2GCTT_rep_7	25954	0	CGCAGCTCGGTGCTTCTCGCGGAAGCGAGAAGCGCCGAGCTGCGGTAGACATTAAAGATT	28024.4
TDG_TG_f1TT_f2ACCC_rep_2	21056	0	CGCAGCTCTTTACCCCTCGCGGAAGCGAGGGGTGAAGAGCTGCGGTAGACATTAAAGATT	22398.4
TDG_TG_f1GC_f2TAGC_rep_7	19837	0	CGCAGCTCGCTTAGCCTCGCGGAAGCGAGGCTAGGCGAGCTGCGGTAGACATTAAAGATT	21020.9
TDG_TG_f1AA_f2GAAA_rep_1	26660	0	CGCAGCTCAATGAAACTCGCGGAAGCGAGTTTCGTTGAGCTGCGGTAGACATTAAAGATT	28273.2
TDG_TG_f1TT_f2CAAC_rep_1	19358	0	CGCAGCTCTTTCAACCTCGCGGAAGCGAGGTTGGAAGAGCTGCGGTAGACATTAAAGATT	20635.3
TDG_TG_M_M1TA_M2TC_rep_1	19953	0	CGCAGCTCTTTTGGTCTCGCGGAAGCGAGACCCGAAGAGCTGCGGTAGACATTAAAGATT	21304.6
TDG_ff_TG_M_f1CC_f2TT_rep_5	22640	0	CGCAGCCCTTTAGGTTTCGCGGAAGCGAAACCTGAAGGGCTGCGGTAGACATTAAAGATT	23774.5
TDG_ff_TG_H_f1AG_f2TA_rep_5	30960	0	CGCAGCAGAGTGTATTACGCGGAAGCGTAATACGCTCTGCTGCGGTAGACATTAAAGATT	32391.3
TDG_TG_f1TA_f2ACAT_rep_10	21303	0	CGCAGCTCTATACATCTCGCGGAAGCGAGATGTGTAGAGCTGCGGTAGACATTAAAGATT	22493.3
TDG_TG_f1TG_f2AATC_rep_2	22774	0	CGCAGCTCTGTAATCCTCGCGGAAGCGAGGATTGCAGAGCTGCGGTAGACATTAAAGATT	24015.9
TDG_TG_f1TG_f2ATTA_rep_8	22671	0	CGCAGCTCTGTATTACTCGCGGAAGCGAGTAATGCAGAGCTGCGGTAGACATTAAAGATT	23848.8
TDG_TG_f1GC_f2ACTT_rep_6	22276	0	CGCAGCTCGCTACTTCTCGCGGAAGCGAGAAGTGGCGAGCTGCGGTAGACATTAAAGATT	23392.2
TDG_ff_TG_H_f1AA_f2GG_rep_9	30244	0	CGCAGCAAAGTGTATGGCGCGGAAGCGCCATACGCTTTGCTGCGGTAGACATTAAAGATT	31586.4
TDG_TG_f1AC_f2TCGT_rep_1	20121	0	CGCAGCTCACTTCGTCTCGCGGAAGCGAGACGAGGTGAGCTGCGGTAGACATTAAAGATT	20937.8
TDG_TG_f1TA_f2GCCG_rep_8	27687	0	CGCAGCTCTATGCCGCTCGCGGAAGCGAGCGGCGTAGAGCTGCGGTAGACATTAAAGATT	28738.3
TDG_TG_f1AG_f2CCTT_rep_3	23707	0	CGCAGCTCAGTCCTTCTCGCGGAAGCGAGAAGGGCTGAGCTGCGGTAGACATTAAAGATT	24312.2
TDG_TG_f1AC_f2AACT_rep_7	22420	0	CGCAGCTCACTAACTCTCGCGGAAGCGAGAGTTGGTGAGCTGCGGTAGACATTAAAGATT	22981.4
TDG_TG_f1CT_f2GTTA_rep_4	26627	0	CGCAGCTCCTTGTTACTCGCGGAAGCGAGTAACGAGGAGCTGCGGTAGACATTAAAGATT	27236.5
TDG_TG_f1GA_f2GTGT_rep_8	27009	0	CGCAGCTCGATGTGTCTCGCGGAAGCGAGACACGTCGAGCTGCGGTAGACATTAAAGATT	27688.3
TDG_TG_L_M1AG_M2TC_rep_2	20431	0	CGCAGCTCCATTAGCCTCGCGGAAGCGAGGCTCGGGGAGCTGCGGTAGACATTAAAGATT	20874.8
TDG_TG_f1AT_f2GCGT_rep_6	27049	0	CGCAGCTCATTGCGTCTCGCGGAAGCGAGACGCGATGAGCTGCGGTAGACATTAAAGATT	27677.2
TDG_TG_f1GC_f2GTTC_rep_6	26558	0	CGCAGCTCGCTGTTCCTCGCGGAAGCGAGGAACGGCGAGCTGCGGTAGACATTAAAGATT	27236
TDG_TG_H_M1GA_M2AA_rep_5	22172	0	CGCAGCTCAGTATATCTCGCGGAAGCGAGATAAGATGAGCTGCGGTAGACATTAAAGATT	22634.1
TDG_TG_f1AG_f2CGAT_rep_10	26317	0	CGCAGCTCAGTCGATCTCGCGGAAGCGAGATCGGCTGAGCTGCGGTAGACATTAAAGATT	26865.4
TDG_TG_f1GA_f2CCGG_rep_10	20921	0	CGCAGCTCGATCCGGCTCGCGGAAGCGAGCCGGGTCGAGCTGCGGTAGACATTAAAGATT	21381.4
TDG_TG_f1AA_f2TTGA_rep_8	20591	0	CGCAGCTCAATTTGACTCGCGGAAGCGAGTCAAGTTGAGCTGCGGTAGACATTAAAGATT	21095.2
TDG_ff_TG_M_f1AC_f2GT_rep_2	25546	0	CGCAGCACTTTAGGTGTCGCGGAAGCGACACCTGAAGTGCTGCGGTAGACATTAAAGATT	26276.8
TDG_TG_f1TA_f2GCTG_rep_8	27649	0	CGCAGCTCTATGCTGCTCGCGGAAGCGAGCAGCGTAGAGCTGCGGTAGACATTAAAGATT	28493.8
TDG_TG_f1TG_f2TGAG_rep_7	21117	0	CGCAGCTCTGTTGAGCTCGCGGAAGCGAGCTCAGCAGAGCTGCGGTAGACATTAAAGATT	21981
TDG_ff_TG_H_f1TT_f2CG_rep_6	29450	0	CGCAGCTTAGTGTATCGCGCGGAAGCGCGATACGCTAAGCTGCGGTAGACATTAAAGATT	30798.6
TDG_TG_f1GC_f2GCCT_rep_9	24933	0	CGCAGCTCGCTGCCTCTCGCGGAAGCGAGAGGCGGCGAGCTGCGGTAGACATTAAAGATT	26077
TDG_TG_f1AA_f2GATA_rep_9	28784	0	CGCAGCTCAATGATACTCGCGGAAGCGAGTATCGTTGAGCTGCGGTAGACATTAAAGATT	30192.8
TDG_TG_f1TA_f2TCGC_rep_1	21069	0	CGCAGCTCTATTCGCCTCGCGGAAGCGAGGCGAGTAGAGCTGCGGTAGACATTAAAGATT	22016.3
TDG_TG_f1CC_f2TCTT_rep_6	20729	0	CGCAGCTCCCTTCTTCTCGCGGAAGCGAGAAGAGGGGAGCTGCGGTAGACATTAAAGATT	21798.7
TDG_TG_f1AG_f2CTGC_rep_6	24443	0	CGCAGCTCAGTCTGCCTCGCGGAAGCGAGGCAGGCTGAGCTGCGGTAGACATTAAAGATT	25812.7
TDG_TG_f1TC_f2CCTT_rep_4	21155	0	CGCAGCTCTCTCCTTCTCGCGGAAGCGAGAAGGGGAGAGCTGCGGTAGACATTAAAGATT	22411.5
TDG_TG_f1AC_f2TAGC_rep_1	21143	0	CGCAGCTCACTTAGCCTCGCGGAAGCGAGGCTAGGTGAGCTGCGGTAGACATTAAAGATT	22320.3
TDG_ff_TG_H_f1CA_f2TA_rep_2	30144	0	CGCAGCCAAGTGTATTACGCGGAAGCGTAATACGCTTGGCTGCGGTAGACATTAAAGATT	31719.2
TDG_TG_f1AT_f2TGCA_rep_10	21813	0	CGCAGCTCATTTGCACTCGCGGAAGCGAGTGCAGATGAGCTGCGGTAGACATTAAAGATT	23035.4
TDG_TG_f1GT_f2GCAC_rep_9	25788	0	CGCAGCTCGTTGCACCTCGCGGAAGCGAGGTGCGACGAGCTGCGGTAGACATTAAAGATT	27065.8
TDG_ff_TA_H_f1TG_f2AA_rep_5	21871	0	CGCAGCTGAGTGTATAACGCGGAAGCGTTATACACTCAGCTGCGGTAGACATTAAAGATT	22911
TDG_TG_f1GT_f2ATAT_rep_2	22756	0	CGCAGCTCGTTATATCTCGCGGAAGCGAGATATGACGAGCTGCGGTAGACATTAAAGATT	23779.1
TDG_TG_f1GT_f2TTCG_rep_10	20714	0	CGCAGCTCGTTTTCGCTCGCGGAAGCGAGCGAAGACGAGCTGCGGTAGACATTAAAGATT	21758.7
TDG_ff_TG_M_f1TG_f2CT_rep_3	24067	0	CGCAGCTGTTTAGGTCTCGCGGAAGCGAGACCTGAACAGCTGCGGTAGACATTAAAGATT	25023.1
TDG_TG_f1AA_f2TACA_rep_6	21295	0	CGCAGCTCAATTACACTCGCGGAAGCGAGTGTAGTTGAGCTGCGGTAGACATTAAAGATT	22118.1
TDG_TG_f1CT_f2GATT_rep_6	26579	0	CGCAGCTCCTTGATTCTCGCGGAAGCGAGAATCGAGGAGCTGCGGTAGACATTAAAGATT	27627
TDG_TG_f1GT_f2TCCC_rep_2	21041	0	CGCAGCTCGTTTCCCCTCGCGGAAGCGAGGGGAGACGAGCTGCGGTAGACATTAAAGATT	21868.2
TDG_TG_f1TA_f2CAAA_rep_2	20863	0	CGCAGCTCTATCAAACTCGCGGAAGCGAGTTTGGTAGAGCTGCGGTAGACATTAAAGATT	21509.4
TDG_TG_f1CT_f2TGGC_rep_6	21003	0	CGCAGCTCCTTTGGCCTCGCGGAAGCGAGGCCAGAGGAGCTGCGGTAGACATTAAAGATT	21576.6
TDG_hyb_TG_f1CA_f2GCAT_rep_7	29429	0	TATTATTTATCGCAGCATGCATCGCGGAAGCGATGCGTGCTGCGGTAGACATTAAAGATT	29969.9
TDG_ff_TA_H_f1TG_f2AT_rep_5	22231	0	CGCAGCTGAGTGTATATCGCGGAAGCGATATACACTCAGCTGCGGTAGACATTAAAGATT	22696.2
TDG_ff_TG_H_f1TG_f2TA_rep_7	29590	0	CGCAGCTGAGTGTATTACGCGGAAGCGTAATACGCTCAGCTGCGGTAGACATTAAAGATT	30253.6
TDG_TG_f1CG_f2CATG_rep_8	21382	0	CGCAGCTCCGTCATGCTCGCGGAAGCGAGCATGGCGGAGCTGCGGTAGACATTAAAGATT	22044.5
TDG_TG_f1TT_f2CAGG_rep_4	20886	0	CGCAGCTCTTTCAGGCTCGCGGAAGCGAGCCTGGAAGAGCTGCGGTAGACATTAAAGATT	21597.1
TDG_TG_M_M1TC_M2GC_rep_6	23912	0	CGCAGCTCTTTGGGTCTCGCGGAAGCGAGACCCGCAGAGCTGCGGTAGACATTAAAGATT	24671.1
TDG_TG_f1CG_f2CCAT_rep_2	21514	0	CGCAGCTCCGTCCATCTCGCGGAAGCGAGATGGGCGGAGCTGCGGTAGACATTAAAGATT	22184.4
TDG_TG_f1CG_f2CCGT_rep_7	21896	0	CGCAGCTCCGTCCGTCTCGCGGAAGCGAGACGGGCGGAGCTGCGGTAGACATTAAAGATT	22370.2
TDG_TG_M_M1GG_M2TG_rep_3	22351	0	CGCAGCTCTGTTGGTCTCGCGGAAGCGAGACCGGGAGAGCTGCGGTAGACATTAAAGATT	22817.8
TDG_ff_TG_M_f1TG_f2GG_rep_3	24507	0	CGCAGCTGTTTAGGTGGCGCGGAAGCGCCACCTGAACAGCTGCGGTAGACATTAAAGATT	25132.7
TDG_TG_H_M1CC_M2AG_rep_10	20935	0	CGCAGCTCACTATATCTCGCGGAAGCGAGATAGGCTGAGCTGCGGTAGACATTAAAGATT	21490.9
TDG_TG_f1CC_f2CTCG_rep_9	23048	0	CGCAGCTCCCTCTCGCTCGCGGAAGCGAGCGAGGGGGAGCTGCGGTAGACATTAAAGATT	23612.9
TDG_TG_M_M1CT_M2GT_rep_5	23527	0	CGCAGCTCTCTGGGTCTCGCGGAAGCGAGACCTGTAGAGCTGCGGTAGACATTAAAGATT	24255.9
TDG_TG_M_M1CT_M2TG_rep_8	21290	0	CGCAGCTCTCTTGGTCTCGCGGAAGCGAGACCGGTAGAGCTGCGGTAGACATTAAAGATT	21853.4
TDG_TG_f1GC_f2GATT_rep_1	26044	0	CGCAGCTCGCTGATTCTCGCGGAAGCGAGAATCGGCGAGCTGCGGTAGACATTAAAGATT	26812.3
TDG_TG_f1GA_f2CTGG_rep_10	21969	0	CGCAGCTCGATCTGGCTCGCGGAAGCGAGCCAGGTCGAGCTGCGGTAGACATTAAAGATT	22877.9
TDG_TG_f1CA_f2TAAG_rep_9	21156	0	CGCAGCTCCATTAAGCTCGCGGAAGCGAGCTTAGTGGAGCTGCGGTAGACATTAAAGATT	22051.7
TDG_TG_f1AA_f2ATGG_rep_1	23052	0	CGCAGCTCAATATGGCTCGCGGAAGCGAGCCATGTTGAGCTGCGGTAGACATTAAAGATT	24314.5
TDG_TG_f1GT_f2ACCG_rep_10	23226	0	CGCAGCTCGTTACCGCTCGCGGAAGCGAGCGGTGACGAGCTGCGGTAGACATTAAAGATT	24401.7
TDG_TG_f1TG_f2TACC_rep_3	21583	0	CGCAGCTCTGTTACCCTCGCGGAAGCGAGGGTAGCAGAGCTGCGGTAGACATTAAAGATT	22677.6
TDG_TG_f1CA_f2CCCC_rep_3	22454	0	CGCAGCTCCATCCCCCTCGCGGAAGCGAGGGGGGTGGAGCTGCGGTAGACATTAAAGATT	23530.1
TDG_TG_f1AT_f2TTGG_rep_8	21120	0	CGCAGCTCATTTTGGCTCGCGGAAGCGAGCCAAGATGAGCTGCGGTAGACATTAAAGATT	21859.1
TDG_TG_f1TA_f2CATG_rep_9	20910	0	CGCAGCTCTATCATGCTCGCGGAAGCGAGCATGGTAGAGCTGCGGTAGACATTAAAGATT	21621
TDG_TG_f1AG_f2GATG_rep_10	28265	0	CGCAGCTCAGTGATGCTCGCGGAAGCGAGCATCGCTGAGCTGCGGTAGACATTAAAGATT	29246.5
TDG_TG_f1CA_f2CTTG_rep_8	21293	0	CGCAGCTCCATCTTGCTCGCGGAAGCGAGCAAGGTGGAGCTGCGGTAGACATTAAAGATT	22015.5
TDG_TG_f1TG_f2CCGT_rep_1	22230	0	CGCAGCTCTGTCCGTCTCGCGGAAGCGAGACGGGCAGAGCTGCGGTAGACATTAAAGATT	22985.8
TDG_TG_L_M1GC_M2AG_rep_10	21073	0	CGCAGCTCCGTAAGCCTCGCGGAAGCGAGGCTGGCGGAGCTGCGGTAGACATTAAAGATT	21803.8
TDG_TG_f1GC_f2CGAC_rep_10	22562	0	CGCAGCTCGCTCGACCTCGCGGAAGCGAGGTCGGGCGAGCTGCGGTAGACATTAAAGATT	23283.8
TDG_TG_f1TG_f2AGTC_rep_9	26613	0	CGCAGCTCTGTAGTCCTCGCGGAAGCGAGGACTGCAGAGCTGCGGTAGACATTAAAGATT	27534.1
TDG_ff_TG_M_f1CA_f2GA_rep_2	26168	0	CGCAGCCATTTAGGTGACGCGGAAGCGTCACCTGAATGGCTGCGGTAGACATTAAAGATT	27056
TDG_TG_f1GA_f2ATAA_rep_1	22868	0	CGCAGCTCGATATAACTCGCGGAAGCGAGTTATGTCGAGCTGCGGTAGACATTAAAGATT	23468.1
TDG_TG_f1TT_f2TCCC_rep_9	21243	0	CGCAGCTCTTTTCCCCTCGCGGAAGCGAGGGGAGAAGAGCTGCGGTAGACATTAAAGATT	21800.5
TDG_TG_f1CC_f2GCAG_rep_5	27051	0	CGCAGCTCCCTGCAGCTCGCGGAAGCGAGCTGCGGGGAGCTGCGGTAGACATTAAAGATT	27800.1
TDG_ff_TG_L_f1CC_f2GA_rep_2	23103	0	CGCAGCCCCATTAGCGACGCGGAAGCGTCGCTAGTGGGGCTGCGGTAGACATTAAAGATT	23742.7
TDG_TG_f1TG_f2GTGT_rep_5	28116	0	CGCAGCTCTGTGTGTCTCGCGGAAGCGAGACACGCAGAGCTGCGGTAGACATTAAAGATT	28836.9
TDG_TG_f1AT_f2CAGT_rep_1	21030	0	CGCAGCTCATTCAGTCTCGCGGAAGCGAGACTGGATGAGCTGCGGTAGACATTAAAGATT	21569.2
TDG_ff_TG_H_f1TT_f2TC_rep_5	30052	0	CGCAGCTTAGTGTATTCCGCGGAAGCGGAATACGCTAAGCTGCGGTAGACATTAAAGATT	31095.5
TDG_ff_TG_L_f1TA_f2GC_rep_6	22261	0	CGCAGCTACATTAGCGCCGCGGAAGCGGCGCTAGTGTAGCTGCGGTAGACATTAAAGATT	23051.1
TDG_TG_f1TG_f2TAAC_rep_9	21081	0	CGCAGCTCTGTTAACCTCGCGGAAGCGAGGTTAGCAGAGCTGCGGTAGACATTAAAGATT	21849.3
TDG_TG_f1AA_f2TCAC_rep_1	20864	0	CGCAGCTCAATTCACCTCGCGGAAGCGAGGTGAGTTGAGCTGCGGTAGACATTAAAGATT	21632.9
TDG_TG_f1GT_f2ATTC_rep_3	22576	0	CGCAGCTCGTTATTCCTCGCGGAAGCGAGGAATGACGAGCTGCGGTAGACATTAAAGATT	23408
TDG_ff_TA_H_f1TC_f2TA_rep_5	22338	0	CGCAGCTCAGTGTATTACGCGGAAGCGTAATACACTGAGCTGCGGTAGACATTAAAGATT	23144.5
TDG_TG_L_M1AT_M2GA_rep_10	25560	0	CGCAGCTCCATGAGCCTCGCGGAAGCGAGGCTAGTGGAGCTGCGGTAGACATTAAAGATT	26511.9
TDG_TG_f1GC_f2CGAG_rep_7	21813	0	CGCAGCTCGCTCGAGCTCGCGGAAGCGAGCTCGGGCGAGCTGCGGTAGACATTAAAGATT	22484.9
TDG_TG_f1AG_f2GTCA_rep_1	29778	0	CGCAGCTCAGTGTCACTCGCGGAAGCGAGTGACGCTGAGCTGCGGTAGACATTAAAGATT	30875.5
TDG_TG_f1GT_f2TAGG_rep_6	21082	0	CGCAGCTCGTTTAGGCTCGCGGAAGCGAGCCTAGACGAGCTGCGGTAGACATTAAAGATT	21912.3
TDG_TG_f1GC_f2CGAA_rep_9	21663	0	CGCAGCTCGCTCGAACTCGCGGAAGCGAGTTCGGGCGAGCTGCGGTAGACATTAAAGATT	22487
TDG_TG_f1TC_f2TTGG_rep_9	20350	0	CGCAGCTCTCTTTGGCTCGCGGAAGCGAGCCAAGGAGAGCTGCGGTAGACATTAAAGATT	20994.7
TDG_hyb_TG_f1AA_f2AGCG_rep_5	25557	0	TATTATTTATCGCAGAATAGCGCGCGGAAGCGCGCTGTTCTGCGGTAGACATTAAAGATT	26402.9
TDG_TG_f1CC_f2TGGC_rep_2	21632	0	CGCAGCTCCCTTGGCCTCGCGGAAGCGAGGCCAGGGGAGCTGCGGTAGACATTAAAGATT	22378.3
TDG_ff_TG_L_f1GT_f2CC_rep_1	22620	0	CGCAGCGTCATTAGCCCCGCGGAAGCGGGGCTAGTGACGCTGCGGTAGACATTAAAGATT	23284.3
TDG_TG_f1CA_f2TGGT_rep_8	21577	0	CGCAGCTCCATTGGTCTCGCGGAAGCGAGACCAGTGGAGCTGCGGTAGACATTAAAGATT	21742.4
TDG_ff_TG_H_f1TC_f2TC_rep_8	29899	0	CGCAGCTCAGTGTATTCCGCGGAAGCGGAATACGCTGAGCTGCGGTAGACATTAAAGATT	29868.7
TDG_ff_TG_L_f1AG_f2GA_rep_7	26033	0	CGCAGCAGCATTAGCGACGCGGAAGCGTCGCTAGTGCTGCTGCGGTAGACATTAAAGATT	25965.5
TDG_TG_f1GT_f2GCGT_rep_8	26737	0	CGCAGCTCGTTGCGTCTCGCGGAAGCGAGACGCGACGAGCTGCGGTAGACATTAAAGATT	26681.2
TDG_TG_f1GT_f2CAAT_rep_2	21638	0	CGCAGCTCGTTCAATCTCGCGGAAGCGAGATTGGACGAGCTGCGGTAGACATTAAAGATT	21519.8
TDG_TG_f1GC_f2TCTA_rep_2	21272	0	CGCAGCTCGCTTCTACTCGCGGAAGCGAGTAGAGGCGAGCTGCGGTAGACATTAAAGATT	21165.5
TDG_TG_f1AC_f2ATGC_rep_6	22946	0	CGCAGCTCACTATGCCTCGCGGAAGCGAGGCATGGTGAGCTGCGGTAGACATTAAAGATT	22802.4
TDG_TG_f1CT_f2CAAG_rep_7	21242	0	CGCAGCTCCTTCAAGCTCGCGGAAGCGAGCTTGGAGGAGCTGCGGTAGACATTAAAGATT	21113.5
TDG_TG_f1CC_f2GCTT_rep_7	26308	0	CGCAGCTCCCTGCTTCTCGCGGAAGCGAGAAGCGGGGAGCTGCGGTAGACATTAAAGATT	25972.1
TDG_TG_f1AC_f2CACG_rep_5	22026	0	CGCAGCTCACTCACGCTCGCGGAAGCGAGCGTGGGTGAGCTGCGGTAGACATTAAAGATT	21655.3
TDG_TG_f1TA_f2CTAT_rep_6	22117	0	CGCAGCTCTATCTATCTCGCGGAAGCGAGATAGGTAGAGCTGCGGTAGACATTAAAGATT	21805.5
TDG_ff_TA_H_f1AC_f2GA_rep_10	24065	0	CGCAGCACAGTGTATGACGCGGAAGCGTCATACACTGTGCTGCGGTAGACATTAAAGATT	23726.1
TDG_TG_f1AT_f2ACGC_rep_3	23469	0	CGCAGCTCATTACGCCTCGCGGAAGCGAGGCGTGATGAGCTGCGGTAGACATTAAAGATT	23138.5
TDG_TG_f1TC_f2CCCC_rep_1	22665	0	CGCAGCTCTCTCCCCCTCGCGGAAGCGAGGGGGGGAGAGCTGCGGTAGACATTAAAGATT	22345.8
TDG_TG_M_M1TA_M2CA_rep_2	20850	0	CGCAGCTCTTTCGGTCTCGCGGAAGCGAGACCAGAAGAGCTGCGGTAGACATTAAAGATT	20556.3
TDG_TG_f1AC_f2TGTC_rep_8	21483	0	CGCAGCTCACTTGTCCTCGCGGAAGCGAGGACAGGTGAGCTGCGGTAGACATTAAAGATT	21180.4
TDG_TG_L_M1GA_M2GG_rep_8	18922	0	CGCAGCTCCGTGAGCCTCGCGGAAGCGAGGCTGGAGGAGCTGCGGTAGACATTAAAGATT	21380.9
TDG_TG_f1AC_f2GCTA_rep_5	24130	0	CGCAGCTCACTGCTACTCGCGGAAGCGAGTAGCGGTGAGCTGCGGTAGACATTAAAGATT	27265.7
TDG_TG_f1AG_f2GGTT_rep_1	25968	0	CGCAGCTCAGTGGTTCTCGCGGAAGCGAGAACCGCTGAGCTGCGGTAGACATTAAAGATT	29342.5
TDG_TG_f1TT_f2ACCA_rep_9	20900	0	CGCAGCTCTTTACCACTCGCGGAAGCGAGTGGTGAAGAGCTGCGGTAGACATTAAAGATT	23615.9
TDG_TG_f1GA_f2CAGA_rep_6	19781	0	CGCAGCTCGATCAGACTCGCGGAAGCGAGTCTGGTCGAGCTGCGGTAGACATTAAAGATT	22351.5
TDG_TG_f1AT_f2CTCT_rep_1	21136	0	CGCAGCTCATTCTCTCTCGCGGAAGCGAGAGAGGATGAGCTGCGGTAGACATTAAAGATT	23882.6
TDG_TG_f1AA_f2GGAT_rep_4	26934	0	CGCAGCTCAATGGATCTCGCGGAAGCGAGATCCGTTGAGCTGCGGTAGACATTAAAGATT	30462.4
TDG_ff_TA_H_f1GG_f2AA_rep_7	20939	0	CGCAGCGGAGTGTATAACGCGGAAGCGTTATACACTCCGCTGCGGTAGACATTAAAGATT	23477.2
TDG_TG_f1TG_f2GGGT_rep_5	25723	0	CGCAGCTCTGTGGGTCTCGCGGAAGCGAGACCCGCAGAGCTGCGGTAGACATTAAAGATT	28827.5
TDG_TG_f1TA_f2AGAA_rep_10	22758	0	CGCAGCTCTATAGAACTCGCGGAAGCGAGTTCTGTAGAGCTGCGGTAGACATTAAAGATT	25524
TDG_ff_TG_H_f1GT_f2CC_rep_2	27317	0	CGCAGCGTAGTGTATCCCGCGGAAGCGGGATACGCTACGCTGCGGTAGACATTAAAGATT	30589.2
TDG_TG_f1TA_f2ATTG_rep_3	21096	0	CGCAGCTCTATATTGCTCGCGGAAGCGAGCAATGTAGAGCTGCGGTAGACATTAAAGATT	23605.2
TDG_TG_f1TT_f2TATG_rep_10	19122	0	CGCAGCTCTTTTATGCTCGCGGAAGCGAGCATAGAAGAGCTGCGGTAGACATTAAAGATT	21381.2
TDG_TG_M_M1CA_M2GA_rep_9	19500	0	CGCAGCTCTCTGGGTCTCGCGGAAGCGAGACCAGAAGAGCTGCGGTAGACATTAAAGATT	21803.9
TDG_TG_M_M1AT_M2TT_rep_9	19504	0	CGCAGCTCTATTGGTCTCGCGGAAGCGAGACCTGTAGAGCTGCGGTAGACATTAAAGATT	21740.5
TDG_TG_f1TG_f2CCTC_rep_9	21032	0	CGCAGCTCTGTCCTCCTCGCGGAAGCGAGGAGGGCAGAGCTGCGGTAGACATTAAAGATT	23228.2
TDG_TG_f1GC_f2AGGC_rep_1	21518	0	CGCAGCTCGCTAGGCCTCGCGGAAGCGAGGCCTGGCGAGCTGCGGTAGACATTAAAGATT	23958.4
TDG_TG_f1CG_f2CTCA_rep_10	22500	0	CGCAGCTCCGTCTCACTCGCGGAAGCGAGTGAGGCGGAGCTGCGGTAGACATTAAAGATT	25171.4
TDG_ff_TG_L_f1AT_f2GG_rep_3	21500	0	CGCAGCATCATTAGCGGCGCGGAAGCGCCGCTAGTGATGCTGCGGTAGACATTAAAGATT	23891.7
TDG_TG_f1CC_f2AGGA_rep_9	21395	0	CGCAGCTCCCTAGGACTCGCGGAAGCGAGTCCTGGGGAGCTGCGGTAGACATTAAAGATT	23803.5
TDG_TG_f1TT_f2CAGA_rep_9	19525	0	CGCAGCTCTTTCAGACTCGCGGAAGCGAGTCTGGAAGAGCTGCGGTAGACATTAAAGATT	21697
TDG_TG_f1CT_f2CACC_rep_3	19878	0	CGCAGCTCCTTCACCCTCGCGGAAGCGAGGGTGGAGGAGCTGCGGTAGACATTAAAGATT	22011.7
TDG_TG_f1GC_f2CATC_rep_2	20173	0	CGCAGCTCGCTCATCCTCGCGGAAGCGAGGATGGGCGAGCTGCGGTAGACATTAAAGATT	22308.6
TDG_TG_f1CT_f2CATA_rep_3	19661	0	CGCAGCTCCTTCATACTCGCGGAAGCGAGTATGGAGGAGCTGCGGTAGACATTAAAGATT	21711.5
TDG_TG_f1GT_f2CAGG_rep_10	19998	0	CGCAGCTCGTTCAGGCTCGCGGAAGCGAGCCTGGACGAGCTGCGGTAGACATTAAAGATT	21957.1
TDG_TG_f1GA_f2GTAA_rep_2	27128	0	CGCAGCTCGATGTAACTCGCGGAAGCGAGTTACGTCGAGCTGCGGTAGACATTAAAGATT	29785.5
TDG_TG_f1TG_f2TCGG_rep_10	19490	0	CGCAGCTCTGTTCGGCTCGCGGAAGCGAGCCGAGCAGAGCTGCGGTAGACATTAAAGATT	21514.1
TDG_TG_f1GG_f2TCTC_rep_10	19787	0	CGCAGCTCGGTTCTCCTCGCGGAAGCGAGGAGAGCCGAGCTGCGGTAGACATTAAAGATT	21873.1
TDG_TG_f1CT_f2ACGC_rep_2	20892	0	CGCAGCTCCTTACGCCTCGCGGAAGCGAGGCGTGAGGAGCTGCGGTAGACATTAAAGATT	22934.9
TDG_ff_TA_H_f1AC_f2GA_rep_5	22160	0	CGCAGCACAGTGTATGACGCGGAAGCGTCATACACTGTGCTGCGGTAGACATTAAAGATT	24308.3
TDG_TG_f1CC_f2AGAT_rep_6	22114	0	CGCAGCTCCCTAGATCTCGCGGAAGCGAGATCTGGGGAGCTGCGGTAGACATTAAAGATT	24487.7
TDG_TG_f1AC_f2GGCC_rep_4	24520	0	CGCAGCTCACTGGCCCTCGCGGAAGCGAGGGCCGGTGAGCTGCGGTAGACATTAAAGATT	26975.2
TDG_ff_TG_H_f1GC_f2GA_rep_4	28342	0	CGCAGCGCAGTGTATGACGCGGAAGCGTCATACGCTGCGCTGCGGTAGACATTAAAGATT	31081
TDG_TG_f1TG_f2ACCA_rep_2	23189	0	CGCAGCTCTGTACCACTCGCGGAAGCGAGTGGTGCAGAGCTGCGGTAGACATTAAAGATT	25584.7
TDG_TG_f1TA_f2ACCG_rep_4	21754	0	CGCAGCTCTATACCGCTCGCGGAAGCGAGCGGTGTAGAGCTGCGGTAGACATTAAAGATT	24093
TDG_TG_f1AG_f2CATA_rep_5	22536	0	CGCAGCTCAGTCATACTCGCGGAAGCGAGTATGGCTGAGCTGCGGTAGACATTAAAGATT	24884.6
TDG_TG_f1TT_f2CTAT_rep_9	19465	0	CGCAGCTCTTTCTATCTCGCGGAAGCGAGATAGGAAGAGCTGCGGTAGACATTAAAGATT	21624.2
TDG_TG_f1TA_f2TTGG_rep_6	19732	0	CGCAGCTCTATTTGGCTCGCGGAAGCGAGCCAAGTAGAGCTGCGGTAGACATTAAAGATT	22048.7
TDG_ff_TG_M_f1AT_f2TG_rep_9	23634	0	CGCAGCATTTTAGGTTGCGCGGAAGCGCAACCTGAAATGCTGCGGTAGACATTAAAGATT	26417.6
TDG_TG_f1TA_f2TCAT_rep_9	19505	0	CGCAGCTCTATTCATCTCGCGGAAGCGAGATGAGTAGAGCTGCGGTAGACATTAAAGATT	21755
TDG_TG_f1AT_f2GTAA_rep_3	26429	0	CGCAGCTCATTGTAACTCGCGGAAGCGAGTTACGATGAGCTGCGGTAGACATTAAAGATT	29413.9
TDG_TG_f1GG_f2CTGA_rep_9	22762	0	CGCAGCTCGGTCTGACTCGCGGAAGCGAGTCAGGCCGAGCTGCGGTAGACATTAAAGATT	25263.8
TDG_TG_f1TC_f2GATC_rep_7	24621	0	CGCAGCTCTCTGATCCTCGCGGAAGCGAGGATCGGAGAGCTGCGGTAGACATTAAAGATT	27309.9
TDG_ff_TA_H_f1AG_f2GA_rep_4	24967	0	CGCAGCAGAGTGTATGACGCGGAAGCGTCATACACTCTGCTGCGGTAGACATTAAAGATT	27735.9
TDG_TG_f1GC_f2AGAC_rep_6	22274	0	CGCAGCTCGCTAGACCTCGCGGAAGCGAGGTCTGGCGAGCTGCGGTAGACATTAAAGATT	24469.6
TDG_ff_TG_M_f1AT_f2CT_rep_3	23736	0	CGCAGCATTTTAGGTCTCGCGGAAGCGAGACCTGAAATGCTGCGGTAGACATTAAAGATT	26075.8
TDG_TG_f1GA_f2GACT_rep_3	25801	0	CGCAGCTCGATGACTCTCGCGGAAGCGAGAGTCGTCGAGCTGCGGTAGACATTAAAGATT	28489.8
TDG_TG_f1TA_f2CTGG_rep_8	20174	0	CGCAGCTCTATCTGGCTCGCGGAAGCGAGCCAGGTAGAGCTGCGGTAGACATTAAAGATT	21944.1
TDG_TG_f1TT_f2CCGT_rep_10	19554	0	CGCAGCTCTTTCCGTCTCGCGGAAGCGAGACGGGAAGAGCTGCGGTAGACATTAAAGATT	21383.2
TDG_TG_f1GA_f2ACCG_rep_4	21636	0	CGCAGCTCGATACCGCTCGCGGAAGCGAGCGGTGTCGAGCTGCGGTAGACATTAAAGATT	23298.2
TDG_TG_M_M1AA_M2TA_rep_3	20004	0	CGCAGCTCTATTGGTCTCGCGGAAGCGAGACCAGAAGAGCTGCGGTAGACATTAAAGATT	21875.3
TDG_ff_TG_M_f1CT_f2GT_rep_10	23238	0	CGCAGCCTTTTAGGTGTCGCGGAAGCGACACCTGAAAGGCTGCGGTAGACATTAAAGATT	25390.7
TDG_TG_f1CG_f2GTAG_rep_5	26672	0	CGCAGCTCCGTGTAGCTCGCGGAAGCGAGCTACGCGGAGCTGCGGTAGACATTAAAGATT	29155
TDG_TG_f1TC_f2AGAC_rep_5	22961	0	CGCAGCTCTCTAGACCTCGCGGAAGCGAGGTCTGGAGAGCTGCGGTAGACATTAAAGATT	25109
TDG_TG_f1GT_f2AACG_rep_3	22494	0	CGCAGCTCGTTAACGCTCGCGGAAGCGAGCGTTGACGAGCTGCGGTAGACATTAAAGATT	24566.5
TDG_Tbulge_f1G_f2A_rep_6	20168	0	CGCAGCTCAGTACAGCTCGCGGAAGCGAGCTGTCTGAGCTGCGGTAGACATTAAAGATT	22026.2
TDG_TG_f1TT_f2GCCG_rep_1	24941	0	CGCAGCTCTTTGCCGCTCGCGGAAGCGAGCGGCGAAGAGCTGCGGTAGACATTAAAGATT	27194.4
TDG_TG_f1AT_f2ATGC_rep_3	21654	0	CGCAGCTCATTATGCCTCGCGGAAGCGAGGCATGATGAGCTGCGGTAGACATTAAAGATT	23510.7
TDG_TG_f1CA_f2AGAA_rep_7	23127	0	CGCAGCTCCATAGAACTCGCGGAAGCGAGTTCTGTGGAGCTGCGGTAGACATTAAAGATT	25024.5
TDG_TG_f1TC_f2AATC_rep_4	20684	0	CGCAGCTCTCTAATCCTCGCGGAAGCGAGGATTGGAGAGCTGCGGTAGACATTAAAGATT	22452.9
TDG_TG_f1GC_f2CACA_rep_9	19999	0	CGCAGCTCGCTCACACTCGCGGAAGCGAGTGTGGGCGAGCTGCGGTAGACATTAAAGATT	21831.5
TDG_TG_f1CT_f2CCGC_rep_9	19905	0	CGCAGCTCCTTCCGCCTCGCGGAAGCGAGGCGGGAGGAGCTGCGGTAGACATTAAAGATT	21721.9
TDG_TG_f1GA_f2TTGA_rep_4	20151	0	CGCAGCTCGATTTGACTCGCGGAAGCGAGTCAAGTCGAGCTGCGGTAGACATTAAAGATT	21982.2
TDG_TG_f1AG_f2AACA_rep_7	24583	0	CGCAGCTCAGTAACACTCGCGGAAGCGAGTGTTGCTGAGCTGCGGTAGACATTAAAGATT	26613.9
TDG_TG_f1AC_f2AGTC_rep_8	22786	0	CGCAGCTCACTAGTCCTCGCGGAAGCGAGGACTGGTGAGCTGCGGTAGACATTAAAGATT	24681.4
TDG_TG_f1TG_f2GGTC_rep_7	26342	0	CGCAGCTCTGTGGTCCTCGCGGAAGCGAGGACCGCAGAGCTGCGGTAGACATTAAAGATT	28477.2
TDG_TG_f1CA_f2TAGA_rep_10	21041	0	CGCAGCTCCATTAGACTCGCGGAAGCGAGTCTAGTGGAGCTGCGGTAGACATTAAAGATT	22763.7
TDG_TG_f1GA_f2CTTA_rep_5	20454	0	CGCAGCTCGATCTTACTCGCGGAAGCGAGTAAGGTCGAGCTGCGGTAGACATTAAAGATT	22050.5
TDG_TG_f1GT_f2ATCC_rep_4	22729	0	CGCAGCTCGTTATCCCTCGCGGAAGCGAGGGATGACGAGCTGCGGTAGACATTAAAGATT	24542.2
TDG_TG_f1TT_f2CCTA_rep_3	19501	0	CGCAGCTCTTTCCTACTCGCGGAAGCGAGTAGGGAAGAGCTGCGGTAGACATTAAAGATT	20744.3
TDG_TG_f1TG_f2TAAG_rep_2	19423	0	CGCAGCTCTGTTAAGCTCGCGGAAGCGAGCTTAGCAGAGCTGCGGTAGACATTAAAGATT	20582.2
TDG_TG_f1TG_f2TGCC_rep_6	20512	0	CGCAGCTCTGTTGCCCTCGCGGAAGCGAGGGCAGCAGAGCTGCGGTAGACATTAAAGATT	21753.2
TDG_TG_f1CA_f2TCGT_rep_7	19938	0	CGCAGCTCCATTCGTCTCGCGGAAGCGAGACGAGTGGAGCTGCGGTAGACATTAAAGATT	21253.5
TDG_TG_f1TT_f2TTCG_rep_10	19958	0	CGCAGCTCTTTTTCGCTCGCGGAAGCGAGCGAAGAAGAGCTGCGGTAGACATTAAAGATT	21309.9
TDG_TG_f1GC_f2AGAC_rep_4	22892	0	CGCAGCTCGCTAGACCTCGCGGAAGCGAGGTCTGGCGAGCTGCGGTAGACATTAAAGATT	24039.1
TDG_TG_H_M1GC_M2GA_rep_5	24939	0	CGCAGCTCAGTGTATCTCGCGGAAGCGAGATAAGCTGAGCTGCGGTAGACATTAAAGATT	26092
TDG_TG_M_M1CC_M2GA_rep_8	19950	0	CGCAGCTCTCTGGGTCTCGCGGAAGCGAGACCAGCAGAGCTGCGGTAGACATTAAAGATT	21037.9
TDG_TG_f1AA_f2GAAC_rep_4	27706	0	CGCAGCTCAATGAACCTCGCGGAAGCGAGGTTCGTTGAGCTGCGGTAGACATTAAAGATT	29145.4
TDG_TG_f1CA_f2CAGA_rep_10	21707	0	CGCAGCTCCATCAGACTCGCGGAAGCGAGTCTGGTGGAGCTGCGGTAGACATTAAAGATT	22794.7
TDG_TG_f1TC_f2CACC_rep_9	20861	0	CGCAGCTCTCTCACCCTCGCGGAAGCGAGGGTGGGAGAGCTGCGGTAGACATTAAAGATT	21786.9
TDG_TG_f1CA_f2GCCT_rep_7	26424	0	CGCAGCTCCATGCCTCTCGCGGAAGCGAGAGGCGTGGAGCTGCGGTAGACATTAAAGATT	27496.7
TDG_ff_TA_H_f1CA_f2AA_rep_3	22366	0	CGCAGCCAAGTGTATAACGCGGAAGCGTTATACACTTGGCTGCGGTAGACATTAAAGATT	23215.2
TDG_TG_f1AG_f2TATA_rep_7	21313	0	CGCAGCTCAGTTATACTCGCGGAAGCGAGTATAGCTGAGCTGCGGTAGACATTAAAGATT	21857.1
TDG_TG_f1TG_f2CAAG_rep_3	21387	0	CGCAGCTCTGTCAAGCTCGCGGAAGCGAGCTTGGCAGAGCTGCGGTAGACATTAAAGATT	21922.6
TDG_ff_TG_H_f1CA_f2GC_rep_10	29928	0	CGCAGCCAAGTGTATGCCGCGGAAGCGGCATACGCTTGGCTGCGGTAGACATTAAAGATT	30613.1
TDG_TG_M_M1GG_M2CG_rep_9	20941	0	CGCAGCTCTGTCGGTCTCGCGGAAGCGAGACCGGGAGAGCTGCGGTAGACATTAAAGATT	21467.7
TDG_ff_TG_L_f1CG_f2TA_rep_2	24416	0	CGCAGCCGCATTAGCTACGCGGAAGCGTAGCTAGTGCGGCTGCGGTAGACATTAAAGATT	25000.3
TDG_TG_f1AA_f2AAGT_rep_1	22230	0	CGCAGCTCAATAAGTCTCGCGGAAGCGAGACTTGTTGAGCTGCGGTAGACATTAAAGATT	22712.9
TDG_ff_TG_M_f1AA_f2GG_rep_6	26670	0	CGCAGCAATTTAGGTGGCGCGGAAGCGCCACCTGAATTGCTGCGGTAGACATTAAAGATT	27289.4
TDG_ff_TA_H_f1CA_f2AT_rep_6	23183	0	CGCAGCCAAGTGTATATCGCGGAAGCGATATACACTTGGCTGCGGTAGACATTAAAGATT	23774.9
TDG_TG_f1CA_f2AGGG_rep_1	23650	0	CGCAGCTCCATAGGGCTCGCGGAAGCGAGCCCTGTGGAGCTGCGGTAGACATTAAAGATT	24142.9
TDG_ff_TG_H_f1GT_f2TG_rep_6	29577	0	CGCAGCGTAGTGTATTGCGCGGAAGCGCAATACGCTACGCTGCGGTAGACATTAAAGATT	30193.4
TDG_TG_f1TC_f2TTAT_rep_2	20615	0	CGCAGCTCTCTTTATCTCGCGGAAGCGAGATAAGGAGAGCTGCGGTAGACATTAAAGATT	21068.7
TDG_ff_TG_M_f1GC_f2CG_rep_1	24067	0	CGCAGCGCTTTAGGTCGCGCGGAAGCGCGACCTGAAGCGCTGCGGTAGACATTAAAGATT	24656.3
TDG_TG_f1TA_f2CGAA_rep_2	21457	0	CGCAGCTCTATCGAACTCGCGGAAGCGAGTTCGGTAGAGCTGCGGTAGACATTAAAGATT	22070.8
TDG_TG_f1CG_f2ATAC_rep_5	22563	0	CGCAGCTCCGTATACCTCGCGGAAGCGAGGTATGCGGAGCTGCGGTAGACATTAAAGATT	23252.4
TDG_TG_f1CT_f2GCTC_rep_3	26307	0	CGCAGCTCCTTGCTCCTCGCGGAAGCGAGGAGCGAGGAGCTGCGGTAGACATTAAAGATT	27383.4
TDG_TG_f1GT_f2TGAT_rep_8	21632	0	CGCAGCTCGTTTGATCTCGCGGAAGCGAGATCAGACGAGCTGCGGTAGACATTAAAGATT	22622.6
TDG_TG_f1GG_f2TAGA_rep_5	21532	0	CGCAGCTCGGTTAGACTCGCGGAAGCGAGTCTAGCCGAGCTGCGGTAGACATTAAAGATT	22520
TDG_TG_f1TT_f2TAAT_rep_3	20430	0	CGCAGCTCTTTTAATCTCGCGGAAGCGAGATTAGAAGAGCTGCGGTAGACATTAAAGATT	21429.9
TDG_ff_TG_L_f1GT_f2AG_rep_4	22324	0	CGCAGCGTCATTAGCAGCGCGGAAGCGCTGCTAGTGACGCTGCGGTAGACATTAAAGATT	23327.7
TDG_TG_f1AC_f2CACA_rep_8	21723	0	CGCAGCTCACTCACACTCGCGGAAGCGAGTGTGGGTGAGCTGCGGTAGACATTAAAGATT	22844
TDG_ff_TG_M_f1AG_f2GC_rep_6	27730	0	CGCAGCAGTTTAGGTGCCGCGGAAGCGGCACCTGAACTGCTGCGGTAGACATTAAAGATT	29283.9
TDG_TG_f1TT_f2CGAG_rep_10	20959	0	CGCAGCTCTTTCGAGCTCGCGGAAGCGAGCTCGGAAGAGCTGCGGTAGACATTAAAGATT	22203.9
TDG_TG_f1GT_f2ACCT_rep_2	22397	0	CGCAGCTCGTTACCTCTCGCGGAAGCGAGAGGTGACGAGCTGCGGTAGACATTAAAGATT	23644.2
TDG_TG_f1CT_f2CGTC_rep_6	21250	0	CGCAGCTCCTTCGTCCTCGCGGAAGCGAGGACGGAGGAGCTGCGGTAGACATTAAAGATT	22360.5
TDG_TG_f1AG_f2ATGG_rep_1	24165	0	CGCAGCTCAGTATGGCTCGCGGAAGCGAGCCATGCTGAGCTGCGGTAGACATTAAAGATT	25519.2
TDG_TG_f1GG_f2AACT_rep_8	23870	0	CGCAGCTCGGTAACTCTCGCGGAAGCGAGAGTTGCCGAGCTGCGGTAGACATTAAAGATT	25052.8
TDG_ff_TA_H_f1CC_f2TA_rep_4	21909	0	CGCAGCCCAGTGTATTACGCGGAAGCGTAATACACTGGGCTGCGGTAGACATTAAAGATT	22950.8
TDG_TG_f1CA_f2AATG_rep_4	22924	0	CGCAGCTCCATAATGCTCGCGGAAGCGAGCATTGTGGAGCTGCGGTAGACATTAAAGATT	23954.7
TDG_TG_L_M1AG_M2AG_rep_10	21270	0	CGCAGCTCCATAAGCCTCGCGGAAGCGAGGCTGGGGGAGCTGCGGTAGACATTAAAGATT	22342.8
TDG_TG_f1AC_f2GGAG_rep_9	27294	0	CGCAGCTCACTGGAGCTCGCGGAAGCGAGCTCCGGTGAGCTGCGGTAGACATTAAAGATT	28545.1
TDG_TG_f1TA_f2TTAT_rep_9	21153	0	CGCAGCTCTATTTATCTCGCGGAAGCGAGATAAGTAGAGCTGCGGTAGACATTAAAGATT	21993.3
TDG_TG_f1GG_f2CACC_rep_7	25654	0	CGCAGCTCGGTCACCCTCGCGGAAGCGAGGGTGGCCGAGCTGCGGTAGACATTAAAGATT	26645.6
TDG_TG_f1GC_f2CCGA_rep_2	21602	0	CGCAGCTCGCTCCGACTCGCGGAAGCGAGTCGGGGCGAGCTGCGGTAGACATTAAAGATT	22451.3
TDG_TG_f1AG_f2AATT_rep_9	24105	0	CGCAGCTCAGTAATTCTCGCGGAAGCGAGAATTGCTGAGCTGCGGTAGACATTAAAGATT	24851.8
TDG_TG_f1TG_f2TCAA_rep_8	20583	0	CGCAGCTCTGTTCAACTCGCGGAAGCGAGTTGAGCAGAGCTGCGGTAGACATTAAAGATT	21145.1
TDG_TG_f1CT_f2ACTC_rep_10	22551	0	CGCAGCTCCTTACTCCTCGCGGAAGCGAGGAGTGAGGAGCTGCGGTAGACATTAAAGATT	22965.5
TDG_TG_f1AT_f2TCGC_rep_5	21280	0	CGCAGCTCATTTCGCCTCGCGGAAGCGAGGCGAGATGAGCTGCGGTAGACATTAAAGATT	21757.3
TDG_ff_TG_H_f1CG_f2GT_rep_5	30666	0	CGCAGCCGAGTGTATGTCGCGGAAGCGACATACGCTCGGCTGCGGTAGACATTAAAGATT	31616.1
TDG_TG_f1CC_f2TTTC_rep_9	21060	0	CGCAGCTCCCTTTTCCTCGCGGAAGCGAGGAAAGGGGAGCTGCGGTAGACATTAAAGATT	21777
TDG_TG_M_M1GC_M2AA_rep_2	21530	0	CGCAGCTCTGTAGGTCTCGCGGAAGCGAGACCAGCAGAGCTGCGGTAGACATTAAAGATT	22200.9
TDG_TG_f1TG_f2GCGA_rep_3	28293	0	CGCAGCTCTGTGCGACTCGCGGAAGCGAGTCGCGCAGAGCTGCGGTAGACATTAAAGATT	28905.7
TDG_ff_TA_H_f1TT_f2CT_rep_6	22052	0	CGCAGCTTAGTGTATCTCGCGGAAGCGAGATACACTAAGCTGCGGTAGACATTAAAGATT	22512.5
TDG_TG_f1GA_f2CGCA_rep_3	23627	0	CGCAGCTCGATCGCACTCGCGGAAGCGAGTGCGGTCGAGCTGCGGTAGACATTAAAGATT	24230.2
TDG_TG_M_M1GC_M2AA_rep_9	21578	0	CGCAGCTCTGTAGGTCTCGCGGAAGCGAGACCAGCAGAGCTGCGGTAGACATTAAAGATT	22151
TDG_ff_TG_L_f1CA_f2GA_rep_3	23292	0	CGCAGCCACATTAGCGACGCGGAAGCGTCGCTAGTGTGGCTGCGGTAGACATTAAAGATT	23862.9
TDG_ff_TG_H_f1CT_f2CG_rep_1	29770	0	CGCAGCCTAGTGTATCGCGCGGAAGCGCGATACGCTAGGCTGCGGTAGACATTAAAGATT	30692.3
TDG_TG_H_M1CC_M2CT_rep_1	21030	0	CGCAGCTCACTCTATCTCGCGGAAGCGAGATATGCTGAGCTGCGGTAGACATTAAAGATT	21586.5
TDG_TG_f1TT_f2GGGG_rep_8	27603	0	CGCAGCTCTTTGGGGCTCGCGGAAGCGAGCCCCGAAGAGCTGCGGTAGACATTAAAGATT	28417.3
TDG_TG_f1TC_f2CGCA_rep_4	23347	0	CGCAGCTCTCTCGCACTCGCGGAAGCGAGTGCGGGAGAGCTGCGGTAGACATTAAAGATT	24312.9
TDG_TG_M_M1AC_M2AC_rep_6	21225	0	CGCAGCTCTATAGGTCTCGCGGAAGCGAGACCCGCAGAGCTGCGGTAGACATTAAAGATT	22123.6
TDG_TG_f1AA_f2ACGT_rep_4	23592	0	CGCAGCTCAATACGTCTCGCGGAAGCGAGACGTGTTGAGCTGCGGTAGACATTAAAGATT	24884.1
TDG_TG_f1AC_f2GCAC_rep_10	27369	0	CGCAGCTCACTGCACCTCGCGGAAGCGAGGTGCGGTGAGCTGCGGTAGACATTAAAGATT	28754.5
TDG_TG_f1TG_f2TCCT_rep_2	21162	0	CGCAGCTCTGTTCCTCTCGCGGAAGCGAGAGGAGCAGAGCTGCGGTAGACATTAAAGATT	22235.2
TDG_TG_f1GT_f2GTGG_rep_3	27106	0	CGCAGCTCGTTGTGGCTCGCGGAAGCGAGCCACGACGAGCTGCGGTAGACATTAAAGATT	28405
TDG_TG_f1GC_f2GTAC_rep_9	27349	0	CGCAGCTCGCTGTACCTCGCGGAAGCGAGGTACGGCGAGCTGCGGTAGACATTAAAGATT	28306.1
TDG_TG_f1CG_f2TGTA_rep_7	21340	0	CGCAGCTCCGTTGTACTCGCGGAAGCGAGTACAGCGGAGCTGCGGTAGACATTAAAGATT	22065.6
TDG_TG_f1GA_f2ACCA_rep_7	22955	0	CGCAGCTCGATACCACTCGCGGAAGCGAGTGGTGTCGAGCTGCGGTAGACATTAAAGATT	23752.1
TDG_TG_f1CG_f2ACCA_rep_2	23058	0	CGCAGCTCCGTACCACTCGCGGAAGCGAGTGGTGCGGAGCTGCGGTAGACATTAAAGATT	23840.4
TDG_TG_f1GC_f2TTTC_rep_6	21309	0	CGCAGCTCGCTTTTCCTCGCGGAAGCGAGGAAAGGCGAGCTGCGGTAGACATTAAAGATT	22033.5
TDG_TG_L_M1AT_M2AA_rep_3	22011	0	CGCAGCTCCATAAGCCTCGCGGAAGCGAGGCTAGTGGAGCTGCGGTAGACATTAAAGATT	22774.3
TDG_TG_L_M1AC_M2AG_rep_6	21426	0	CGCAGCTCCATAAGCCTCGCGGAAGCGAGGCTGGCGGAGCTGCGGTAGACATTAAAGATT	22111.5
TDG_TG_f1CC_f2GAGC_rep_8	26522	0	CGCAGCTCCCTGAGCCTCGCGGAAGCGAGGCTCGGGGAGCTGCGGTAGACATTAAAGATT	27440
TDG_TG_f1TT_f2GGGA_rep_3	27397	0	CGCAGCTCTTTGGGACTCGCGGAAGCGAGTCCCGAAGAGCTGCGGTAGACATTAAAGATT	28326.7
TDG_TG_H_M1AT_M2TG_rep_2	21331	0	CGCAGCTCAATTTATCTCGCGGAAGCGAGATAGGTTGAGCTGCGGTAGACATTAAAGATT	21890.8
TDG_TG_f1CT_f2AAGT_rep_5	22885	0	CGCAGCTCCTTAAGTCTCGCGGAAGCGAGACTTGAGGAGCTGCGGTAGACATTAAAGATT	23485.5
TDG_TG_f1GA_f2ATCC_rep_4	24880	0	CGCAGCTCGATATCCCTCGCGGAAGCGAGGGATGTCGAGCTGCGGTAGACATTAAAGATT	25568.9
TDG_TG_H_M1GA_M2CA_rep_8	21154	0	CGCAGCTCAGTCTATCTCGCGGAAGCGAGATAAGATGAGCTGCGGTAGACATTAAAGATT	21696.4
TDG_TG_f1GA_f2TAAC_rep_2	21617	0	CGCAGCTCGATTAACCTCGCGGAAGCGAGGTTAGTCGAGCTGCGGTAGACATTAAAGATT	22171.3
TDG_ff_TG_H_f1AA_f2GC_rep_8	31369	0	CGCAGCAAAGTGTATGCCGCGGAAGCGGCATACGCTTTGCTGCGGTAGACATTAAAGATT	32458.3
TDG_ff_TA_H_f1AT_f2TC_rep_10	24283	0	CGCAGCATAGTGTATTCCGCGGAAGCGGAATACACTATGCTGCGGTAGACATTAAAGATT	25144.9
TDG_TG_f1CA_f2TTTG_rep_9	21319	0	CGCAGCTCCATTTTGCTCGCGGAAGCGAGCAAAGTGGAGCTGCGGTAGACATTAAAGATT	22096
TDG_TG_f1CA_f2TCGA_rep_4	21827	0	CGCAGCTCCATTCGACTCGCGGAAGCGAGTCGAGTGGAGCTGCGGTAGACATTAAAGATT	22631.4
TDG_TG_f1TA_f2TAGT_rep_1	21243	0	CGCAGCTCTATTAGTCTCGCGGAAGCGAGACTAGTAGAGCTGCGGTAGACATTAAAGATT	22025.9
TDG_ff_TG_M_f1CG_f2TG_rep_1	24741	0	CGCAGCCGTTTAGGTTGCGCGGAAGCGCAACCTGAACGGCTGCGGTAGACATTAAAGATT	25634.3
TDG_TG_H_M1CG_M2AG_rep_9	21842	0	CGCAGCTCACTATATCTCGCGGAAGCGAGATAGGGTGAGCTGCGGTAGACATTAAAGATT	22655.4
TDG_TG_H_M1GT_M2AG_rep_10	21339	0	CGCAGCTCAGTATATCTCGCGGAAGCGAGATAGGTTGAGCTGCGGTAGACATTAAAGATT	21996.3
TDG_TG_f1CA_f2CATT_rep_10	21614	0	CGCAGCTCCATCATTCTCGCGGAAGCGAGAATGGTGGAGCTGCGGTAGACATTAAAGATT	22410.6
TDG_TG_f1TT_f2TAGT_rep_10	20462	0	CGCAGCTCTTTTAGTCTCGCGGAAGCGAGACTAGAAGAGCTGCGGTAGACATTAAAGATT	21267.9
TDG_TG_f1GT_f2GCTG_rep_3	25935	0	CGCAGCTCGTTGCTGCTCGCGGAAGCGAGCAGCGACGAGCTGCGGTAGACATTAAAGATT	26921.5
TDG_TG_f1AA_f2GTGT_rep_8	29036	0	CGCAGCTCAATGTGTCTCGCGGAAGCGAGACACGTTGAGCTGCGGTAGACATTAAAGATT	29955.8
TDG_ff_TA_H_f1AC_f2AC_rep_5	23971	0	CGCAGCACAGTGTATACCGCGGAAGCGGTATACACTGTGCTGCGGTAGACATTAAAGATT	24764.4
TDG_TG_M_M1CG_M2CA_rep_5	21061	0	CGCAGCTCTCTCGGTCTCGCGGAAGCGAGACCAGGAGAGCTGCGGTAGACATTAAAGATT	21787.6
TDG_ff_TG_L_f1AG_f2AT_rep_8	26021	0	CGCAGCAGCATTAGCATCGCGGAAGCGATGCTAGTGCTGCTGCGGTAGACATTAAAGATT	26785.2
TDG_TG_f1GT_f2TACT_rep_3	21370	0	CGCAGCTCGTTTACTCTCGCGGAAGCGAGAGTAGACGAGCTGCGGTAGACATTAAAGATT	21533.8
TDG_ff_TG_L_f1AC_f2CG_rep_6	25102	0	CGCAGCACCATTAGCCGCGCGGAAGCGCGGCTAGTGGTGCTGCGGTAGACATTAAAGATT	25076.6
TDG_ff_TG_M_f1TA_f2AG_rep_9	25516	0	CGCAGCTATTTAGGTAGCGCGGAAGCGCTACCTGAATAGCTGCGGTAGACATTAAAGATT	25449.8
TDG_TG_f1AC_f2ACCC_rep_6	23860	0	CGCAGCTCACTACCCCTCGCGGAAGCGAGGGGTGGTGAGCTGCGGTAGACATTAAAGATT	23810.2
TDG_TG_f1GT_f2TAAG_rep_10	21306	0	CGCAGCTCGTTTAAGCTCGCGGAAGCGAGCTTAGACGAGCTGCGGTAGACATTAAAGATT	21189.6
TDG_TG_f1CG_f2CATG_rep_7	21878	0	CGCAGCTCCGTCATGCTCGCGGAAGCGAGCATGGCGGAGCTGCGGTAGACATTAAAGATT	21768.5
TDG_TG_f1TG_f2GACG_rep_5	28435	0	CGCAGCTCTGTGACGCTCGCGGAAGCGAGCGTCGCAGAGCTGCGGTAGACATTAAAGATT	28257
TDG_TG_f1AG_f2GACT_rep_5	28667	0	CGCAGCTCAGTGACTCTCGCGGAAGCGAGAGTCGCTGAGCTGCGGTAGACATTAAAGATT	28493.6
TDG_TG_f1TC_f2TTCG_rep_3	21339	0	CGCAGCTCTCTTTCGCTCGCGGAAGCGAGCGAAGGAGAGCTGCGGTAGACATTAAAGATT	21066.5
TDG_TG_f1CA_f2GCTT_rep_10	28268	0	CGCAGCTCCATGCTTCTCGCGGAAGCGAGAAGCGTGGAGCTGCGGTAGACATTAAAGATT	27792.3
TDG_TG_f1GG_f2CAAC_rep_9	25443	0	CGCAGCTCGGTCAACCTCGCGGAAGCGAGGTTGGCCGAGCTGCGGTAGACATTAAAGATT	25084.6
TDG_TG_f1CT_f2CGCA_rep_5	23263	0	CGCAGCTCCTTCGCACTCGCGGAAGCGAGTGCGGAGGAGCTGCGGTAGACATTAAAGATT	22935.4
TDG_TG_f1CA_f2CGCT_rep_2	22784	0	CGCAGCTCCATCGCTCTCGCGGAAGCGAGAGCGGTGGAGCTGCGGTAGACATTAAAGATT	22463.1
TDG_TG_f1AC_f2GCGT_rep_3	23995	0	CGCAGCTCACTGCGTCTCGCGGAAGCGAGACGCGGTGAGCTGCGGTAGACATTAAAGATT	27113.1
TDG_TG_H_M1GG_M2AC_rep_9	20644	0	CGCAGCTCAGTATATCTCGCGGAAGCGAGATACGGTGAGCTGCGGTAGACATTAAAGATT	23326.7
TDG_TG_H_M1GG_M2TG_rep_3	19054	0	CGCAGCTCAGTTTATCTCGCGGAAGCGAGATAGGGTGAGCTGCGGTAGACATTAAAGATT	21530
TDG_TG_f1AA_f2GGGG_rep_10	26704	0	CGCAGCTCAATGGGGCTCGCGGAAGCGAGCCCCGTTGAGCTGCGGTAGACATTAAAGATT	30174.2
TDG_ff_TG_L_f1AG_f2GG_rep_2	22909	0	CGCAGCAGCATTAGCGGCGCGGAAGCGCCGCTAGTGCTGCTGCGGTAGACATTAAAGATT	25886
TDG_TG_f1GT_f2AACG_rep_6	21102	0	CGCAGCTCGTTAACGCTCGCGGAAGCGAGCGTTGACGAGCTGCGGTAGACATTAAAGATT	23844.2
TDG_TG_f1TT_f2AACA_rep_6	20723	0	CGCAGCTCTTTAACACTCGCGGAAGCGAGTGTTGAAGAGCTGCGGTAGACATTAAAGATT	23437.8
TDG_TG_f1CG_f2GTAG_rep_3	25337	0	CGCAGCTCCGTGTAGCTCGCGGAAGCGAGCTACGCGGAGCTGCGGTAGACATTAAAGATT	28408.4
TDG_TG_f1AC_f2AACC_rep_7	21429	0	CGCAGCTCACTAACCCTCGCGGAAGCGAGGGTTGGTGAGCTGCGGTAGACATTAAAGATT	24015.3
TDG_TG_f1CG_f2GGAT_rep_5	24916	0	CGCAGCTCCGTGGATCTCGCGGAAGCGAGATCCGCGGAGCTGCGGTAGACATTAAAGATT	27944.3
TDG_TG_f1CC_f2GCTC_rep_9	24031	0	CGCAGCTCCCTGCTCCTCGCGGAAGCGAGGAGCGGGGAGCTGCGGTAGACATTAAAGATT	26909.6
TDG_TG_f1TG_f2GCCA_rep_8	25257	0	CGCAGCTCTGTGCCACTCGCGGAAGCGAGTGGCGCAGAGCTGCGGTAGACATTAAAGATT	28261.1
TDG_ff_TG_M_f1TT_f2GC_rep_8	21706	0	CGCAGCTTTTTAGGTGCCGCGGAAGCGGCACCTGAAAAGCTGCGGTAGACATTAAAGATT	24270.5
TDG_TG_f1CT_f2TTCT_rep_8	19340	0	CGCAGCTCCTTTTCTCTCGCGGAAGCGAGAGAAGAGGAGCTGCGGTAGACATTAAAGATT	21625
TDG_ff_TG_M_f1TC_f2GG_rep_7	22143	0	CGCAGCTCTTTAGGTGGCGCGGAAGCGCCACCTGAAGAGCTGCGGTAGACATTAAAGATT	24682.2
TDG_TG_f1CT_f2ATCA_rep_2	22972	0	CGCAGCTCCTTATCACTCGCGGAAGCGAGTGATGAGGAGCTGCGGTAGACATTAAAGATT	25370.7
TDG_TG_f1TC_f2CTTA_rep_4	19293	0	CGCAGCTCTCTCTTACTCGCGGAAGCGAGTAAGGGAGAGCTGCGGTAGACATTAAAGATT	21481.1
TDG_ff_TG_H_f1TG_f2GC_rep_7	27644	0	CGCAGCTGAGTGTATGCCGCGGAAGCGGCATACGCTCAGCTGCGGTAGACATTAAAGATT	30926.1
TDG_TG_f1GA_f2ACCT_rep_6	20643	0	CGCAGCTCGATACCTCTCGCGGAAGCGAGAGGTGTCGAGCTGCGGTAGACATTAAAGATT	22939.4
TDG_TG_f1CC_f2CAGC_rep_10	20029	0	CGCAGCTCCCTCAGCCTCGCGGAAGCGAGGCTGGGGGAGCTGCGGTAGACATTAAAGATT	22283.7
TDG_TG_f1CA_f2TTTA_rep_7	19469	0	CGCAGCTCCATTTTACTCGCGGAAGCGAGTAAAGTGGAGCTGCGGTAGACATTAAAGATT	21634.8
TDG_TG_f1GA_f2TAGG_rep_10	20085	0	CGCAGCTCGATTAGGCTCGCGGAAGCGAGCCTAGTCGAGCTGCGGTAGACATTAAAGATT	22240.9
TDG_TG_f1CC_f2GAGG_rep_5	24388	0	CGCAGCTCCCTGAGGCTCGCGGAAGCGAGCCTCGGGGAGCTGCGGTAGACATTAAAGATT	26969.9
TDG_ff_TA_H_f1CC_f2TC_rep_9	21343	0	CGCAGCCCAGTGTATTCCGCGGAAGCGGAATACACTGGGCTGCGGTAGACATTAAAGATT	23568.9
TDG_TG_f1AT_f2GCGT_rep_9	25234	0	CGCAGCTCATTGCGTCTCGCGGAAGCGAGACGCGATGAGCTGCGGTAGACATTAAAGATT	27706
TDG_TG_f1AT_f2TAAA_rep_6	19566	0	CGCAGCTCATTTAAACTCGCGGAAGCGAGTTTAGATGAGCTGCGGTAGACATTAAAGATT	21482.7
TDG_TG_f1AC_f2ACAC_rep_7	21167	0	CGCAGCTCACTACACCTCGCGGAAGCGAGGTGTGGTGAGCTGCGGTAGACATTAAAGATT	23365.3
TDG_ff_TG_M_f1CA_f2GC_rep_4	24065	0	CGCAGCCATTTAGGTGCCGCGGAAGCGGCACCTGAATGGCTGCGGTAGACATTAAAGATT	26602.1
TDG_TG_f1AG_f2GCGT_rep_7	26059	0	CGCAGCTCAGTGCGTCTCGCGGAAGCGAGACGCGCTGAGCTGCGGTAGACATTAAAGATT	28607.2
TDG_TG_f1GT_f2TCTA_rep_7	19244	0	CGCAGCTCGTTTCTACTCGCGGAAGCGAGTAGAGACGAGCTGCGGTAGACATTAAAGATT	21109.6
TDG_TG_f1GG_f2CAAA_rep_7	23160	0	CGCAGCTCGGTCAAACTCGCGGAAGCGAGTTTGGCCGAGCTGCGGTAGACATTAAAGATT	25646
TDG_TG_f1AG_f2TTCC_rep_10	21644	0	CGCAGCTCAGTTTCCCTCGCGGAAGCGAGGGAAGCTGAGCTGCGGTAGACATTAAAGATT	23811.3
TDG_TG_f1GG_f2CGCT_rep_1	24465	0	CGCAGCTCGGTCGCTCTCGCGGAAGCGAGAGCGGCCGAGCTGCGGTAGACATTAAAGATT	26829.3
TDG_TG_f1TT_f2CACA_rep_7	19102	0	CGCAGCTCTTTCACACTCGCGGAAGCGAGTGTGGAAGAGCTGCGGTAGACATTAAAGATT	21056.3
TDG_TG_M_M1AT_M2GG_rep_9	21661	0	CGCAGCTCTATGGGTCTCGCGGAAGCGAGACCGGTAGAGCTGCGGTAGACATTAAAGATT	23990
TDG_TG_f1TA_f2CAGA_rep_1	19458	0	CGCAGCTCTATCAGACTCGCGGAAGCGAGTCTGGTAGAGCTGCGGTAGACATTAAAGATT	21485.8
TDG_TG_f1CC_f2TCTC_rep_4	19465	0	CGCAGCTCCCTTCTCCTCGCGGAAGCGAGGAGAGGGGAGCTGCGGTAGACATTAAAGATT	21624.2
TDG_TG_f1GT_f2GAAA_rep_7	24387	0	CGCAGCTCGTTGAAACTCGCGGAAGCGAGTTTCGACGAGCTGCGGTAGACATTAAAGATT	27250.2
TDG_ff_TG_H_f1AT_f2CA_rep_9	28817	0	CGCAGCATAGTGTATCACGCGGAAGCGTGATACGCTATGCTGCGGTAGACATTAAAGATT	32211
TDG_TG_H_M1TA_M2GT_rep_9	26849	0	CGCAGCTCATTGTATCTCGCGGAAGCGAGATATGATGAGCTGCGGTAGACATTAAAGATT	29946.1
TDG_TG_f1TC_f2TATT_rep_8	19254	0	CGCAGCTCTCTTATTCTCGCGGAAGCGAGAATAGGAGAGCTGCGGTAGACATTAAAGATT	21428.6
TDG_TG_f1CG_f2ATCG_rep_1	22134	0	CGCAGCTCCGTATCGCTCGCGGAAGCGAGCGATGCGGAGCTGCGGTAGACATTAAAGATT	24566.8
TDG_TG_L_M1AC_M2TT_rep_6	19011	0	CGCAGCTCCATTAGCCTCGCGGAAGCGAGGCTTGCGGAGCTGCGGTAGACATTAAAGATT	21087.2
TDG_TG_f1TT_f2TGAC_rep_5	19656	0	CGCAGCTCTTTTGACCTCGCGGAAGCGAGGTCAGAAGAGCTGCGGTAGACATTAAAGATT	21835.9
TDG_TG_f1AT_f2GCGT_rep_3	25524	0	CGCAGCTCATTGCGTCTCGCGGAAGCGAGACGCGATGAGCTGCGGTAGACATTAAAGATT	28040
TDG_TG_L_M1GT_M2GC_rep_5	25153	0	CGCAGCTCCGTGAGCCTCGCGGAAGCGAGGCTCGTGGAGCTGCGGTAGACATTAAAGATT	27632.4
TDG_TG_f1TA_f2TGTT_rep_2	19621	0	CGCAGCTCTATTGTTCTCGCGGAAGCGAGAACAGTAGAGCTGCGGTAGACATTAAAGATT	21665.8
TDG_ff_TA_H_f1TA_f2TT_rep_3	20726	0	CGCAGCTAAGTGTATTTCGCGGAAGCGAAATACACTTAGCTGCGGTAGACATTAAAGATT	22544.5
TDG_TG_f1CT_f2CCGA_rep_5	19755	0	CGCAGCTCCTTCCGACTCGCGGAAGCGAGTCGGGAGGAGCTGCGGTAGACATTAAAGATT	21603
TDG_TG_f1GC_f2ATTT_rep_8	20804	0	CGCAGCTCGCTATTTCTCGCGGAAGCGAGAAATGGCGAGCTGCGGTAGACATTAAAGATT	22402.3
TDG_TG_f1AT_f2TCCG_rep_2	20222	0	CGCAGCTCATTTCCGCTCGCGGAAGCGAGCGGAGATGAGCTGCGGTAGACATTAAAGATT	22113.7
TDG_TG_f1TG_f2CGAT_rep_10	23261	0	CGCAGCTCTGTCGATCTCGCGGAAGCGAGATCGGCAGAGCTGCGGTAGACATTAAAGATT	25415.9
TDG_ff_TG_H_f1AT_f2AC_rep_10	29948	0	CGCAGCATAGTGTATACCGCGGAAGCGGTATACGCTATGCTGCGGTAGACATTAAAGATT	32736
TDG_ff_TG_L_f1CA_f2GA_rep_2	22257	0	CGCAGCCACATTAGCGACGCGGAAGCGTCGCTAGTGTGGCTGCGGTAGACATTAAAGATT	24339.1
TDG_TG_f1CT_f2GACG_rep_3	25677	0	CGCAGCTCCTTGACGCTCGCGGAAGCGAGCGTCGAGGAGCTGCGGTAGACATTAAAGATT	28042.7
TDG_TG_f1GT_f2AATG_rep_5	21972	0	CGCAGCTCGTTAATGCTCGCGGAAGCGAGCATTGACGAGCTGCGGTAGACATTAAAGATT	23996.4
TDG_TG_f1AA_f2GTCG_rep_10	28513	0	CGCAGCTCAATGTCGCTCGCGGAAGCGAGCGACGTTGAGCTGCGGTAGACATTAAAGATT	31089.1
TDG_TG_f1GT_f2TGAC_rep_6	20170	0	CGCAGCTCGTTTGACCTCGCGGAAGCGAGGTCAGACGAGCTGCGGTAGACATTAAAGATT	21899.5
TDG_TG_f1GC_f2TTCA_rep_10	19848	0	CGCAGCTCGCTTTCACTCGCGGAAGCGAGTGAAGGCGAGCTGCGGTAGACATTAAAGATT	21476.4
TDG_TG_f1GC_f2TTGT_rep_3	19266	0	CGCAGCTCGCTTTGTCTCGCGGAAGCGAGACAAGGCGAGCTGCGGTAGACATTAAAGATT	21031.4
TDG_TG_f1GC_f2CTTG_rep_4	19449	0	CGCAGCTCGCTCTTGCTCGCGGAAGCGAGCAAGGGCGAGCTGCGGTAGACATTAAAGATT	21216.4
TDG_TG_f1CC_f2CGTC_rep_2	20865	0	CGCAGCTCCCTCGTCCTCGCGGAAGCGAGGACGGGGGAGCTGCGGTAGACATTAAAGATT	22588.8
TDG_ff_TG_L_f1GA_f2AT_rep_9	24233	0	CGCAGCGACATTAGCATCGCGGAAGCGATGCTAGTGTCGCTGCGGTAGACATTAAAGATT	26248.8
TDG_TG_f1CA_f2GGAA_rep_4	27911	0	CGCAGCTCCATGGAACTCGCGGAAGCGAGTTCCGTGGAGCTGCGGTAGACATTAAAGATT	30155.5
TDG_ff_TG_H_f1GA_f2AG_rep_8	29042	0	CGCAGCGAAGTGTATAGCGCGGAAGCGCTATACGCTTCGCTGCGGTAGACATTAAAGATT	31396
TDG_TG_f1AA_f2CAAC_rep_4	20281	0	CGCAGCTCAATCAACCTCGCGGAAGCGAGGTTGGTTGAGCTGCGGTAGACATTAAAGATT	21941.4
TDG_TG_f1AG_f2CGAG_rep_1	25349	0	CGCAGCTCAGTCGAGCTCGCGGAAGCGAGCTCGGCTGAGCTGCGGTAGACATTAAAGATT	27327.5
TDG_TG_f1AG_f2AGCC_rep_2	26128	0	CGCAGCTCAGTAGCCCTCGCGGAAGCGAGGGCTGCTGAGCTGCGGTAGACATTAAAGATT	28212.3
TDG_TG_f1TG_f2GATG_rep_8	26218	0	CGCAGCTCTGTGATGCTCGCGGAAGCGAGCATCGCAGAGCTGCGGTAGACATTAAAGATT	27889.5
TDG_ff_TG_H_f1TC_f2AT_rep_4	28255	0	CGCAGCTCAGTGTATATCGCGGAAGCGATATACGCTGAGCTGCGGTAGACATTAAAGATT	29941.3
TDG_TG_f1GA_f2CACT_rep_6	20374	0	CGCAGCTCGATCACTCTCGCGGAAGCGAGAGTGGTCGAGCTGCGGTAGACATTAAAGATT	21718.3
TDG_TG_f1GT_f2TACG_rep_6	19918	0	CGCAGCTCGTTTACGCTCGCGGAAGCGAGCGTAGACGAGCTGCGGTAGACATTAAAGATT	21267.2
TDG_TG_f1CA_f2GGGG_rep_9	26927	0	CGCAGCTCCATGGGGCTCGCGGAAGCGAGCCCCGTGGAGCTGCGGTAGACATTAAAGATT	28276.3
TDG_TG_f1TG_f2TCGG_rep_2	20253	0	CGCAGCTCTGTTCGGCTCGCGGAAGCGAGCCGAGCAGAGCTGCGGTAGACATTAAAGATT	21189.3
TDG_TG_f1AT_f2TGGG_rep_5	20851	0	CGCAGCTCATTTGGGCTCGCGGAAGCGAGCCCAGATGAGCTGCGGTAGACATTAAAGATT	22016
TDG_TG_f1GC_f2CAGC_rep_6	20799	0	CGCAGCTCGCTCAGCCTCGCGGAAGCGAGGCTGGGCGAGCTGCGGTAGACATTAAAGATT	21933.2
TDG_TG_f1GA_f2GGTC_rep_7	27756	0	CGCAGCTCGATGGTCCTCGCGGAAGCGAGGACCGTCGAGCTGCGGTAGACATTAAAGATT	29198
TDG_TG_H_M1TC_M2CC_rep_10	20211	0	CGCAGCTCATTCTATCTCGCGGAAGCGAGATACGCTGAGCTGCGGTAGACATTAAAGATT	21223.7
TDG_ff_TA_H_f1AG_f2CA_rep_10	25657	0	CGCAGCAGAGTGTATCACGCGGAAGCGTGATACACTCTGCTGCGGTAGACATTAAAGATT	26795.8
TDG_TG_L_M1TG_M2AG_rep_7	20653	0	CGCAGCTCCTTAAGCCTCGCGGAAGCGAGGCTGGGGGAGCTGCGGTAGACATTAAAGATT	21437.2
TDG_TG_f1GT_f2CCAA_rep_4	20760	0	CGCAGCTCGTTCCAACTCGCGGAAGCGAGTTGGGACGAGCTGCGGTAGACATTAAAGATT	21290
TDG_TG_f1CC_f2AAAC_rep_2	21788	0	CGCAGCTCCCTAAACCTCGCGGAAGCGAGGTTTGGGGAGCTGCGGTAGACATTAAAGATT	22333.6
TDG_ff_TG_M_f1GC_f2GA_rep_5	24716	0	CGCAGCGCTTTAGGTGACGCGGAAGCGTCACCTGAAGCGCTGCGGTAGACATTAAAGATT	25281.8
TDG_TG_f1TT_f2TAAC_rep_5	20789	0	CGCAGCTCTTTTAACCTCGCGGAAGCGAGGTTAGAAGAGCTGCGGTAGACATTAAAGATT	21311.9
TDG_ff_TA_H_f1GC_f2AG_rep_7	22544	0	CGCAGCGCAGTGTATAGCGCGGAAGCGCTATACACTGCGCTGCGGTAGACATTAAAGATT	23083.5
TDG_TG_f1CG_f2GGGT_rep_3	27456	0	CGCAGCTCCGTGGGTCTCGCGGAAGCGAGACCCGCGGAGCTGCGGTAGACATTAAAGATT	28052.4
TDG_TG_f1TC_f2AACG_rep_4	23201	0	CGCAGCTCTCTAACGCTCGCGGAAGCGAGCGTTGGAGAGCTGCGGTAGACATTAAAGATT	23739.8
TDG_TG_M_M1AT_M2AG_rep_4	21146	0	CGCAGCTCTATAGGTCTCGCGGAAGCGAGACCGGTAGAGCTGCGGTAGACATTAAAGATT	21685.9
TDG_TG_f1GC_f2ATGC_rep_6	21995	0	CGCAGCTCGCTATGCCTCGCGGAAGCGAGGCATGGCGAGCTGCGGTAGACATTAAAGATT	22453.4
TDG_TG_f1TT_f2GACA_rep_3	26025	0	CGCAGCTCTTTGACACTCGCGGAAGCGAGTGTCGAAGAGCTGCGGTAGACATTAAAGATT	26567.4
TDG_TG_f1GT_f2TCTT_rep_3	21151	0	CGCAGCTCGTTTCTTCTCGCGGAAGCGAGAAGAGACGAGCTGCGGTAGACATTAAAGATT	21616.5
TDG_TG_f1AA_f2TTGC_rep_7	21262	0	CGCAGCTCAATTTGCCTCGCGGAAGCGAGGCAAGTTGAGCTGCGGTAGACATTAAAGATT	21782.6
TDG_ff_TG_H_f1GA_f2TC_rep_3	30478	0	CGCAGCGAAGTGTATTCCGCGGAAGCGGAATACGCTTCGCTGCGGTAGACATTAAAGATT	31349.9
TDG_TG_f1TG_f2AGGT_rep_10	24918	0	CGCAGCTCTGTAGGTCTCGCGGAAGCGAGACCTGCAGAGCTGCGGTAGACATTAAAGATT	25679.4
TDG_TG_f1TC_f2ACGC_rep_9	22148	0	CGCAGCTCTCTACGCCTCGCGGAAGCGAGGCGTGGAGAGCTGCGGTAGACATTAAAGATT	23054.2
TDG_TG_f1TG_f2ATGG_rep_10	23177	0	CGCAGCTCTGTATGGCTCGCGGAAGCGAGCCATGCAGAGCTGCGGTAGACATTAAAGATT	24238.3
TDG_TG_f1AT_f2CGCT_rep_7	23124	0	CGCAGCTCATTCGCTCTCGCGGAAGCGAGAGCGGATGAGCTGCGGTAGACATTAAAGATT	24185
TDG_TG_L_M1TC_M2CC_rep_7	20460	0	CGCAGCTCCTTCAGCCTCGCGGAAGCGAGGCTCGCGGAGCTGCGGTAGACATTAAAGATT	21461.4
TDG_ff_TG_H_f1GG_f2AG_rep_6	30288	0	CGCAGCGGAGTGTATAGCGCGGAAGCGCTATACGCTCCGCTGCGGTAGACATTAAAGATT	31649.8
TDG_TG_f1GC_f2GTGG_rep_10	26812	0	CGCAGCTCGCTGTGGCTCGCGGAAGCGAGCCACGGCGAGCTGCGGTAGACATTAAAGATT	28195.6
TDG_TG_f1AC_f2CTTC_rep_7	21494	0	CGCAGCTCACTCTTCCTCGCGGAAGCGAGGAAGGGTGAGCTGCGGTAGACATTAAAGATT	22698.5
TDG_TG_f1GC_f2CCGA_rep_10	21615	0	CGCAGCTCGCTCCGACTCGCGGAAGCGAGTCGGGGCGAGCTGCGGTAGACATTAAAGATT	22898.8
TDG_TG_f1CC_f2TAAA_rep_9	21075	0	CGCAGCTCCCTTAAACTCGCGGAAGCGAGTTTAGGGGAGCTGCGGTAGACATTAAAGATT	22248.5
TDG_TG_f1GG_f2TGTA_rep_6	22081	0	CGCAGCTCGGTTGTACTCGCGGAAGCGAGTACAGCCGAGCTGCGGTAGACATTAAAGATT	23234.9
TDG_TG_f1GC_f2GGAA_rep_4	26041	0	CGCAGCTCGCTGGAACTCGCGGAAGCGAGTTCCGGCGAGCTGCGGTAGACATTAAAGATT	27500.3
TDG_TG_f1AT_f2TTAC_rep_7	20973	0	CGCAGCTCATTTTACCTCGCGGAAGCGAGGTAAGATGAGCTGCGGTAGACATTAAAGATT	22012.2
TDG_ff_TG_L_f1TA_f2GG_rep_7	21393	0	CGCAGCTACATTAGCGGCGCGGAAGCGCCGCTAGTGTAGCTGCGGTAGACATTAAAGATT	22410.3
TDG_ff_TG_M_f1CG_f2GA_rep_2	24030	0	CGCAGCCGTTTAGGTGACGCGGAAGCGTCACCTGAACGGCTGCGGTAGACATTAAAGATT	25110.4
TDG_TG_f1AG_f2TCGT_rep_2	20964	0	CGCAGCTCAGTTCGTCTCGCGGAAGCGAGACGAGCTGAGCTGCGGTAGACATTAAAGATT	22021.3
TDG_ff_TA_H_f1CC_f2CG_rep_8	22755	0	CGCAGCCCAGTGTATCGCGCGGAAGCGCGATACACTGGGCTGCGGTAGACATTAAAGATT	23798.1
TDG_TG_f1AC_f2AAAA_rep_5	22214	0	CGCAGCTCACTAAAACTCGCGGAAGCGAGTTTTGGTGAGCTGCGGTAGACATTAAAGATT	23072.6
TDG_TG_f1TT_f2GTAC_rep_2	27283	0	CGCAGCTCTTTGTACCTCGCGGAAGCGAGGTACGAAGAGCTGCGGTAGACATTAAAGATT	28358.7
TDG_ff_TG_M_f1CC_f2CG_rep_10	24053	0	CGCAGCCCTTTAGGTCGCGCGGAAGCGCGACCTGAAGGGCTGCGGTAGACATTAAAGATT	24998.6
TDG_TG_f1CT_f2ACTC_rep_9	22765	0	CGCAGCTCCTTACTCCTCGCGGAAGCGAGGAGTGAGGAGCTGCGGTAGACATTAAAGATT	23470.3
TDG_ff_TG_M_f1TC_f2TT_rep_8	23793	0	CGCAGCTCTTTAGGTTTCGCGGAAGCGAAACCTGAAGAGCTGCGGTAGACATTAAAGATT	24442.8
TDG_TG_f1GG_f2CTCG_rep_2	26743	0	CGCAGCTCGGTCTCGCTCGCGGAAGCGAGCGAGGCCGAGCTGCGGTAGACATTAAAGATT	27234.5
TDG_TG_L_M1TC_M2AT_rep_1	20118	0	CGCAGCTCCTTAAGCCTCGCGGAAGCGAGGCTTGCGGAGCTGCGGTAGACATTAAAGATT	20539
TDG_TG_f1TG_f2GCCC_rep_2	27037	0	CGCAGCTCTGTGCCCCTCGCGGAAGCGAGGGGCGCAGAGCTGCGGTAGACATTAAAGATT	27874.7
TDG_TG_f1GC_f2GGTA_rep_6	26315	0	CGCAGCTCGCTGGTACTCGCGGAAGCGAGTACCGGCGAGCTGCGGTAGACATTAAAGATT	27210.9
TDG_TG_L_M1GG_M2TA_rep_9	20694	0	CGCAGCTCCGTTAGCCTCGCGGAAGCGAGGCTAGGGGAGCTGCGGTAGACATTAAAGATT	21351
TDG_TG_f1CA_f2AAGG_rep_10	22745	0	CGCAGCTCCATAAGGCTCGCGGAAGCGAGCCTTGTGGAGCTGCGGTAGACATTAAAGATT	23453.8
TDG_TG_f1TT_f2GTCA_rep_8	27948	0	CGCAGCTCTTTGTCACTCGCGGAAGCGAGTGACGAAGAGCTGCGGTAGACATTAAAGATT	28553.2
TDG_TG_H_M1GG_M2CC_rep_4	20791	0	CGCAGCTCAGTCTATCTCGCGGAAGCGAGATACGGTGAGCTGCGGTAGACATTAAAGATT	21225.2
TDG_TG_f1AA_f2GTGC_rep_7	28942	0	CGCAGCTCAATGTGCCTCGCGGAAGCGAGGCACGTTGAGCTGCGGTAGACATTAAAGATT	29710.5
TDG_TG_f1CA_f2ACAC_rep_8	22520	0	CGCAGCTCCATACACCTCGCGGAAGCGAGGTGTGTGGAGCTGCGGTAGACATTAAAGATT	23071.9
TDG_TG_L_M1GT_M2GC_rep_4	27422	0	CGCAGCTCCGTGAGCCTCGCGGAAGCGAGGCTCGTGGAGCTGCGGTAGACATTAAAGATT	28271.6
TDG_TG_f1TT_f2ATCC_rep_7	24405	0	CGCAGCTCTTTATCCCTCGCGGAAGCGAGGGATGAAGAGCTGCGGTAGACATTAAAGATT	25050.9
TDG_TG_f1GC_f2CCTC_rep_7	21818	0	CGCAGCTCGCTCCTCCTCGCGGAAGCGAGGAGGGGCGAGCTGCGGTAGACATTAAAGATT	22461.7
TDG_TG_f1TG_f2TAAA_rep_4	21042	0	CGCAGCTCTGTTAAACTCGCGGAAGCGAGTTTAGCAGAGCTGCGGTAGACATTAAAGATT	21912.6
TDG_ff_TA_H_f1CA_f2CG_rep_8	23094	0	CGCAGCCAAGTGTATCGCGCGGAAGCGCGATACACTTGGCTGCGGTAGACATTAAAGATT	24071.7
TDG_TG_f1GC_f2TCCT_rep_10	21151	0	CGCAGCTCGCTTCCTCTCGCGGAAGCGAGAGGAGGCGAGCTGCGGTAGACATTAAAGATT	22309.4
TDG_TG_f1CA_f2GATA_rep_10	28644	0	CGCAGCTCCATGATACTCGCGGAAGCGAGTATCGTGGAGCTGCGGTAGACATTAAAGATT	30094
TDG_TG_f1GA_f2GTTT_rep_5	27960	0	CGCAGCTCGATGTTTCTCGCGGAAGCGAGAAACGTCGAGCTGCGGTAGACATTAAAGATT	29378
TDG_TG_f1GC_f2ACCG_rep_8	23635	0	CGCAGCTCGCTACCGCTCGCGGAAGCGAGCGGTGGCGAGCTGCGGTAGACATTAAAGATT	24767.7
TDG_TG_f1CC_f2ACCC_rep_8	22982	0	CGCAGCTCCCTACCCCTCGCGGAAGCGAGGGGTGGGGAGCTGCGGTAGACATTAAAGATT	23786.3
TDG_TG_f1GA_f2TCTG_rep_1	21102	0	CGCAGCTCGATTCTGCTCGCGGAAGCGAGCAGAGTCGAGCTGCGGTAGACATTAAAGATT	21819.5
TDG_TG_f1GC_f2TTGG_rep_9	21015	0	CGCAGCTCGCTTTGGCTCGCGGAAGCGAGCCAAGGCGAGCTGCGGTAGACATTAAAGATT	21744.7
TDG_TG_f1CT_f2ATCT_rep_7	24727	0	CGCAGCTCCTTATCTCTCGCGGAAGCGAGAGATGAGGAGCTGCGGTAGACATTAAAGATT	25566.1
TDG_TG_f1CC_f2GGAA_rep_8	26688	0	CGCAGCTCCCTGGAACTCGCGGAAGCGAGTTCCGGGGAGCTGCGGTAGACATTAAAGATT	27595.4
TDG_TG_f1GC_f2TTTG_rep_1	20856	0	CGCAGCTCGCTTTTGCTCGCGGAAGCGAGCAAAGGCGAGCTGCGGTAGACATTAAAGATT	21579.3
TDG_TG_f1TG_f2CGCT_rep_9	26045	0	CGCAGCTCTGTCGCTCTCGCGGAAGCGAGAGCGGCAGAGCTGCGGTAGACATTAAAGATT	26878.3
TDG_ff_TG_L_f1AA_f2GA_rep_10	25070	0	CGCAGCAACATTAGCGACGCGGAAGCGTCGCTAGTGTTGCTGCGGTAGACATTAAAGATT	25937.7
TDG_ff_TA_H_f1TG_f2TC_rep_9	22866	0	CGCAGCTGAGTGTATTCCGCGGAAGCGGAATACACTCAGCTGCGGTAGACATTAAAGATT	23641.9
TDG_TG_L_M1TA_M2TT_rep_4	20953	0	CGCAGCTCCTTTAGCCTCGCGGAAGCGAGGCTTGAGGAGCTGCGGTAGACATTAAAGATT	21502.8
TDG_ff_TG_H_f1GT_f2GA_rep_8	30660	0	CGCAGCGTAGTGTATGACGCGGAAGCGTCATACGCTACGCTGCGGTAGACATTAAAGATT	31464.6
TDG_TG_f1AC_f2GGTC_rep_9	27653	0	CGCAGCTCACTGGTCCTCGCGGAAGCGAGGACCGGTGAGCTGCGGTAGACATTAAAGATT	28418.7
TDG_TG_f1GT_f2TCCC_rep_1	21078	0	CGCAGCTCGTTTCCCCTCGCGGAAGCGAGGGGAGACGAGCTGCGGTAGACATTAAAGATT	21661.7
TDG_ff_TG_L_f1CG_f2TG_rep_1	24031	0	CGCAGCCGCATTAGCTGCGCGGAAGCGCAGCTAGTGCGGCTGCGGTAGACATTAAAGATT	24647.2
TDG_TG_f1AG_f2TGCT_rep_2	22806	0	CGCAGCTCAGTTGCTCTCGCGGAAGCGAGAGCAGCTGAGCTGCGGTAGACATTAAAGATT	23390.8
TDG_TG_f1GA_f2ATAT_rep_6	23614	0	CGCAGCTCGATATATCTCGCGGAAGCGAGATATGTCGAGCTGCGGTAGACATTAAAGATT	24434
TDG_TG_H_M1GT_M2GA_rep_9	24650	0	CGCAGCTCAGTGTATCTCGCGGAAGCGAGATAAGTTGAGCTGCGGTAGACATTAAAGATT	25524.9
TDG_TG_f1GT_f2CGAT_rep_7	22114	0	CGCAGCTCGTTCGATCTCGCGGAAGCGAGATCGGACGAGCTGCGGTAGACATTAAAGATT	22920
TDG_TG_f1GT_f2GCTG_rep_2	26500	0	CGCAGCTCGTTGCTGCTCGCGGAAGCGAGCAGCGACGAGCTGCGGTAGACATTAAAGATT	27476.7
TDG_TG_f1AA_f2CCCA_rep_6	21969	0	CGCAGCTCAATCCCACTCGCGGAAGCGAGTGGGGTTGAGCTGCGGTAGACATTAAAGATT	22778.7
TDG_TG_f1CG_f2ACGG_rep_8	22819	0	CGCAGCTCCGTACGGCTCGCGGAAGCGAGCCGTGCGGAGCTGCGGTAGACATTAAAGATT	23642.9
TDG_ff_TA_H_f1TA_f2TT_rep_7	22355	0	CGCAGCTAAGTGTATTTCGCGGAAGCGAAATACACTTAGCTGCGGTAGACATTAAAGATT	23187.5
TDG_TG_f1CA_f2AACG_rep_4	23689	0	CGCAGCTCCATAACGCTCGCGGAAGCGAGCGTTGTGGAGCTGCGGTAGACATTAAAGATT	24562.1
TDG_TG_f1GC_f2TCCC_rep_10	21223	0	CGCAGCTCGCTTCCCCTCGCGGAAGCGAGGGGAGGCGAGCTGCGGTAGACATTAAAGATT	22058.8
TDG_TG_L_M1CA_M2GC_rep_7	22511	0	CGCAGCTCCCTGAGCCTCGCGGAAGCGAGGCTCGAGGAGCTGCGGTAGACATTAAAGATT	23367.3
TDG_TG_f1AT_f2TCGG_rep_4	21521	0	CGCAGCTCATTTCGGCTCGCGGAAGCGAGCCGAGATGAGCTGCGGTAGACATTAAAGATT	22202.8
TDG_TG_f1CG_f2CGGC_rep_9	22670	0	CGCAGCTCCGTCGGCCTCGCGGAAGCGAGGCCGGCGGAGCTGCGGTAGACATTAAAGATT	23420.3
TDG_TG_f1AG_f2CGGT_rep_8	25771	0	CGCAGCTCAGTCGGTCTCGCGGAAGCGAGACCGGCTGAGCTGCGGTAGACATTAAAGATT	26660
TDG_TG_f1GG_f2TCTT_rep_4	21650	0	CGCAGCTCGGTTCTTCTCGCGGAAGCGAGAAGAGCCGAGCTGCGGTAGACATTAAAGATT	22285.8
TDG_TG_f1TC_f2CCTC_rep_9	21501	0	CGCAGCTCTCTCCTCCTCGCGGAAGCGAGGAGGGGAGAGCTGCGGTAGACATTAAAGATT	21665.8
TDG_ff_TG_M_f1CA_f2GC_rep_2	26489	0	CGCAGCCATTTAGGTGCCGCGGAAGCGGCACCTGAATGGCTGCGGTAGACATTAAAGATT	26462.2
TDG_TG_M_M1CT_M2AG_rep_7	21428	0	CGCAGCTCTCTAGGTCTCGCGGAAGCGAGACCGGTAGAGCTGCGGTAGACATTAAAGATT	21372.4
TDG_TG_f1CG_f2CGGC_rep_7	22914	0	CGCAGCTCCGTCGGCCTCGCGGAAGCGAGGCCGGCGGAGCTGCGGTAGACATTAAAGATT	22866.2
TDG_TG_f1GC_f2TCAA_rep_2	21741	0	CGCAGCTCGCTTCAACTCGCGGAAGCGAGTTGAGGCGAGCTGCGGTAGACATTAAAGATT	21622.2
TDG_ff_TA_H_f1GC_f2CG_rep_5	23165	0	CGCAGCGCAGTGTATCGCGCGGAAGCGCGATACACTGCGCTGCGGTAGACATTAAAGATT	23049.1
TDG_TG_f1CC_f2CCTT_rep_2	22778	0	CGCAGCTCCCTCCTTCTCGCGGAAGCGAGAAGGGGGGAGCTGCGGTAGACATTAAAGATT	22635.5
TDG_ff_TG_L_f1CT_f2TG_rep_8	21955	0	CGCAGCCTCATTAGCTGCGCGGAAGCGCAGCTAGTGAGGCTGCGGTAGACATTAAAGATT	21822.2
TDG_ff_TA_H_f1AT_f2TA_rep_5	24620	0	CGCAGCATAGTGTATTACGCGGAAGCGTAATACACTATGCTGCGGTAGACATTAAAGATT	24305.6
TDG_TG_f1AG_f2CACA_rep_3	26086	0	CGCAGCTCAGTCACACTCGCGGAAGCGAGTGTGGCTGAGCTGCGGTAGACATTAAAGATT	25647
TDG_TG_f1TT_f2AAGA_rep_6	22221	0	CGCAGCTCTTTAAGACTCGCGGAAGCGAGTCTTGAAGAGCTGCGGTAGACATTAAAGATT	21908
TDG_ff_TA_H_f1CC_f2AG_rep_2	23079	0	CGCAGCCCAGTGTATAGCGCGGAAGCGCTATACACTGGGCTGCGGTAGACATTAAAGATT	22753.9
TDG_ff_TG_M_f1CA_f2CA_rep_4	26493	0	CGCAGCCATTTAGGTCACGCGGAAGCGTGACCTGAATGGCTGCGGTAGACATTAAAGATT	26119.9
TDG_TG_f1TT_f2CCGG_rep_3	21564	0	CGCAGCTCTTTCCGGCTCGCGGAAGCGAGCCGGGAAGAGCTGCGGTAGACATTAAAGATT	21260.3
TDG_TG_H_M1TC_M2CC_rep_6	21103	0	CGCAGCTCATTCTATCTCGCGGAAGCGAGATACGCTGAGCTGCGGTAGACATTAAAGATT	20805.8
TDG_ff_TG_H_f1TT_f2GC_rep_3	29207	0	CGCAGCTTAGTGTATGCCGCGGAAGCGGCATACGCTAAGCTGCGGTAGACATTAAAGATT	28795.6
TDG_TG_f1CG_f2CGAT_rep_2	20837	0	CGCAGCTCCGTCGATCTCGCGGAAGCGAGATCGGCGGAGCTGCGGTAGACATTAAAGATT	23544.7
TDG_TG_f1AG_f2ATCC_rep_3	24750	0	CGCAGCTCAGTATCCCTCGCGGAAGCGAGGGATGCTGAGCTGCGGTAGACATTAAAGATT	27966.2
TDG_TG_f1GC_f2AGAC_rep_7	21964	0	CGCAGCTCGCTAGACCTCGCGGAAGCGAGGTCTGGCGAGCTGCGGTAGACATTAAAGATT	24818.2
TDG_TG_f1AC_f2CCCG_rep_3	20282	0	CGCAGCTCACTCCCGCTCGCGGAAGCGAGCGGGGGTGAGCTGCGGTAGACATTAAAGATT	22917.6
TDG_TG_f1GA_f2ATGT_rep_2	20740	0	CGCAGCTCGATATGTCTCGCGGAAGCGAGACATGTCGAGCTGCGGTAGACATTAAAGATT	23435.1
TDG_TG_L_M1TC_M2TC_rep_5	18904	0	CGCAGCTCCTTTAGCCTCGCGGAAGCGAGGCTCGCGGAGCTGCGGTAGACATTAAAGATT	21360.6
TDG_TG_f1CG_f2AAGC_rep_8	20034	0	CGCAGCTCCGTAAGCCTCGCGGAAGCGAGGCTTGCGGAGCTGCGGTAGACATTAAAGATT	22658.5
TDG_TG_f1AT_f2AACG_rep_9	22439	0	CGCAGCTCATTAACGCTCGCGGAAGCGAGCGTTGATGAGCTGCGGTAGACATTAAAGATT	25147.2
TDG_TG_f1TG_f2CTCC_rep_1	24019	0	CGCAGCTCTGTCTCCCTCGCGGAAGCGAGGGAGGCAGAGCTGCGGTAGACATTAAAGATT	26938.3
TDG_TG_f1GA_f2CGAA_rep_9	20355	0	CGCAGCTCGATCGAACTCGCGGAAGCGAGTTCGGTCGAGCTGCGGTAGACATTAAAGATT	22793.3
TDG_TG_f1TT_f2TATA_rep_7	19349	0	CGCAGCTCTTTTATACTCGCGGAAGCGAGTATAGAAGAGCTGCGGTAGACATTAAAGATT	21650.4
TDG_TG_f1AT_f2TCTA_rep_9	19179	0	CGCAGCTCATTTCTACTCGCGGAAGCGAGTAGAGATGAGCTGCGGTAGACATTAAAGATT	21444.9
TDG_TG_f1TA_f2GTAT_rep_6	27291	0	CGCAGCTCTATGTATCTCGCGGAAGCGAGATACGTAGAGCTGCGGTAGACATTAAAGATT	30420.5
TDG_TG_f1TT_f2TAGG_rep_3	19388	0	CGCAGCTCTTTTAGGCTCGCGGAAGCGAGCCTAGAAGAGCTGCGGTAGACATTAAAGATT	21412.5
TDG_TG_f1TC_f2AGCC_rep_10	22029	0	CGCAGCTCTCTAGCCCTCGCGGAAGCGAGGGCTGGAGAGCTGCGGTAGACATTAAAGATT	24527.3
TDG_ff_TG_L_f1TG_f2CA_rep_1	23732	0	CGCAGCTGCATTAGCCACGCGGAAGCGTGGCTAGTGCAGCTGCGGTAGACATTAAAGATT	26549.7
TDG_TG_f1CC_f2GAGA_rep_3	23816	0	CGCAGCTCCCTGAGACTCGCGGAAGCGAGTCTCGGGGAGCTGCGGTAGACATTAAAGATT	26465.3
TDG_TG_f1GA_f2TGGC_rep_10	20207	0	CGCAGCTCGATTGGCCTCGCGGAAGCGAGGCCAGTCGAGCTGCGGTAGACATTAAAGATT	22481.8
TDG_ff_TG_M_f1AA_f2TG_rep_4	24476	0	CGCAGCAATTTAGGTTGCGCGGAAGCGCAACCTGAATTGCTGCGGTAGACATTAAAGATT	27198.7
TDG_ff_TG_H_f1AC_f2GT_rep_2	29843	0	CGCAGCACAGTGTATGTCGCGGAAGCGACATACGCTGTGCTGCGGTAGACATTAAAGATT	33046.4
TDG_TG_f1TG_f2ACTC_rep_3	22387	0	CGCAGCTCTGTACTCCTCGCGGAAGCGAGGAGTGCAGAGCTGCGGTAGACATTAAAGATT	24757
TDG_TG_f1GT_f2CCGA_rep_1	20143	0	CGCAGCTCGTTCCGACTCGCGGAAGCGAGTCGGGACGAGCTGCGGTAGACATTAAAGATT	22243.7
TDG_TG_f1TA_f2CTGG_rep_6	19897	0	CGCAGCTCTATCTGGCTCGCGGAAGCGAGCCAGGTAGAGCTGCGGTAGACATTAAAGATT	21846.2
TDG_TG_f1AG_f2AGCC_rep_4	25879	0	CGCAGCTCAGTAGCCCTCGCGGAAGCGAGGGCTGCTGAGCTGCGGTAGACATTAAAGATT	28414.2
TDG_TG_f1AT_f2TCGG_rep_10	19997	0	CGCAGCTCATTTCGGCTCGCGGAAGCGAGCCGAGATGAGCTGCGGTAGACATTAAAGATT	22073.8
TDG_TG_f1CG_f2AAAT_rep_1	20409	0	CGCAGCTCCGTAAATCTCGCGGAAGCGAGATTTGCGGAGCTGCGGTAGACATTAAAGATT	22560.7
TDG_TG_f1CT_f2GGCC_rep_3	24582	0	CGCAGCTCCTTGGCCCTCGCGGAAGCGAGGGCCGAGGAGCTGCGGTAGACATTAAAGATT	26985.7
TDG_TG_f1GA_f2GGAC_rep_3	26688	0	CGCAGCTCGATGGACCTCGCGGAAGCGAGGTCCGTCGAGCTGCGGTAGACATTAAAGATT	29275.3
TDG_TG_M_M1AC_M2AC_rep_1	19657	0	CGCAGCTCTATAGGTCTCGCGGAAGCGAGACCCGCAGAGCTGCGGTAGACATTAAAGATT	21767
TDG_ff_TG_L_f1AC_f2GA_rep_5	23032	0	CGCAGCACCATTAGCGACGCGGAAGCGTCGCTAGTGGTGCTGCGGTAGACATTAAAGATT	25338.3
TDG_TG_f1GT_f2CCGT_rep_9	19685	0	CGCAGCTCGTTCCGTCTCGCGGAAGCGAGACGGGACGAGCTGCGGTAGACATTAAAGATT	21587.4
TDG_TG_L_M1GG_M2TA_rep_8	18931	0	CGCAGCTCCGTTAGCCTCGCGGAAGCGAGGCTAGGGGAGCTGCGGTAGACATTAAAGATT	20886.8
TDG_TG_f1TA_f2CTTG_rep_8	19836	0	CGCAGCTCTATCTTGCTCGCGGAAGCGAGCAAGGTAGAGCTGCGGTAGACATTAAAGATT	21968.8
TDG_TG_f1CC_f2CATT_rep_10	19992	0	CGCAGCTCCCTCATTCTCGCGGAAGCGAGAATGGGGGAGCTGCGGTAGACATTAAAGATT	22209.7
TDG_TG_f1TG_f2TCGC_rep_1	19952	0	CGCAGCTCTGTTCGCCTCGCGGAAGCGAGGCGAGCAGAGCTGCGGTAGACATTAAAGATT	22294.5
TDG_TG_H_M1GT_M2CC_rep_2	20055	0	CGCAGCTCAGTCTATCTCGCGGAAGCGAGATACGTTGAGCTGCGGTAGACATTAAAGATT	22417
TDG_TG_f1CG_f2ATTC_rep_2	20849	0	CGCAGCTCCGTATTCCTCGCGGAAGCGAGGAATGCGGAGCTGCGGTAGACATTAAAGATT	23254
TDG_TG_f1GA_f2GCCC_rep_10	25351	0	CGCAGCTCGATGCCCCTCGCGGAAGCGAGGGGCGTCGAGCTGCGGTAGACATTAAAGATT	28214.2
TDG_ff_TG_M_f1TG_f2AA_rep_3	22905	0	CGCAGCTGTTTAGGTAACGCGGAAGCGTTACCTGAACAGCTGCGGTAGACATTAAAGATT	25422.5
TDG_hyb_TG_f1AT_f2AGTT_rep_1	23061	0	TATTATTTATCGCAGATTAGTTCGCGGAAGCGAACTGATCTGCGGTAGACATTAAAGATT	25579.5
TDG_ff_TG_H_f1AT_f2TA_rep_7	29051	0	CGCAGCATAGTGTATTACGCGGAAGCGTAATACGCTATGCTGCGGTAGACATTAAAGATT	32272.8
TDG_TG_f1CG_f2CCTC_rep_2	20528	0	CGCAGCTCCGTCCTCCTCGCGGAAGCGAGGAGGGCGGAGCTGCGGTAGACATTAAAGATT	22551.5
TDG_TG_f1GA_f2GGGG_rep_8	26660	0	CGCAGCTCGATGGGGCTCGCGGAAGCGAGCCCCGTCGAGCTGCGGTAGACATTAAAGATT	29288
TDG_TG_f1TC_f2GACT_rep_10	24467	0	CGCAGCTCTCTGACTCTCGCGGAAGCGAGAGTCGGAGAGCTGCGGTAGACATTAAAGATT	27016.8
TDG_TG_L_M1GC_M2AC_rep_3	20953	0	CGCAGCTCCGTAAGCCTCGCGGAAGCGAGGCTCGCGGAGCTGCGGTAGACATTAAAGATT	22791.4
TDG_TG_f1TA_f2GTGG_rep_8	27496	0	CGCAGCTCTATGTGGCTCGCGGAAGCGAGCCACGTAGAGCTGCGGTAGACATTAAAGATT	30068.2
TDG_Tbulge_f1A_f2G_rep_10	20915	0	CGCAGCTCAATGCAGCTCGCGGAAGCGAGCTGCTTGAGCTGCGGTAGACATTAAAGATT	22521.8
TDG_TG_f1AA_f2GTCT_rep_9	27452	0	CGCAGCTCAATGTCTCTCGCGGAAGCGAGAGACGTTGAGCTGCGGTAGACATTAAAGATT	30020.1
TDG_TG_f1TA_f2ATCC_rep_10	24522	0	CGCAGCTCTATATCCCTCGCGGAAGCGAGGGATGTAGAGCTGCGGTAGACATTAAAGATT	26793.7
TDG_ff_TA_H_f1CC_f2TA_rep_10	22052	0	CGCAGCCCAGTGTATTACGCGGAAGCGTAATACACTGGGCTGCGGTAGACATTAAAGATT	24104.9
TDG_ff_TG_M_f1CT_f2AA_rep_9	23309	0	CGCAGCCTTTTAGGTAACGCGGAAGCGTTACCTGAAAGGCTGCGGTAGACATTAAAGATT	25489.5
TDG_TG_f1TA_f2TAAC_rep_6	20522	0	CGCAGCTCTATTAACCTCGCGGAAGCGAGGTTAGTAGAGCTGCGGTAGACATTAAAGATT	22412.8
TDG_TG_f1CA_f2CGGG_rep_5	21554	0	CGCAGCTCCATCGGGCTCGCGGAAGCGAGCCCGGTGGAGCTGCGGTAGACATTAAAGATT	23539.9
TDG_TG_f1TC_f2CGTC_rep_2	20467	0	CGCAGCTCTCTCGTCCTCGCGGAAGCGAGGACGGGAGAGCTGCGGTAGACATTAAAGATT	22316.1
TDG_TG_f1CA_f2TCTG_rep_8	19965	0	CGCAGCTCCATTCTGCTCGCGGAAGCGAGCAGAGTGGAGCTGCGGTAGACATTAAAGATT	21676.9
TDG_ff_TA_H_f1CC_f2TG_rep_4	21284	0	CGCAGCCCAGTGTATTGCGCGGAAGCGCAATACACTGGGCTGCGGTAGACATTAAAGATT	23030.2
TDG_TG_f1GC_f2GCAC_rep_5	24999	0	CGCAGCTCGCTGCACCTCGCGGAAGCGAGGTGCGGCGAGCTGCGGTAGACATTAAAGATT	27136.9
TDG_TG_f1GC_f2GCTT_rep_7	24307	0	CGCAGCTCGCTGCTTCTCGCGGAAGCGAGAAGCGGCGAGCTGCGGTAGACATTAAAGATT	26534.3
TDG_TG_f1TG_f2GGCA_rep_2	26783	0	CGCAGCTCTGTGGCACTCGCGGAAGCGAGTGCCGCAGAGCTGCGGTAGACATTAAAGATT	29227.7
TDG_TG_f1CC_f2TGAC_rep_6	20301	0	CGCAGCTCCCTTGACCTCGCGGAAGCGAGGTCAGGGGAGCTGCGGTAGACATTAAAGATT	22145.9
TDG_ff_TG_M_f1GG_f2GA_rep_4	23905	0	CGCAGCGGTTTAGGTGACGCGGAAGCGTCACCTGAACCGCTGCGGTAGACATTAAAGATT	25879.9
TDG_ff_TG_M_f1TC_f2CA_rep_2	22882	0	CGCAGCTCTTTAGGTCACGCGGAAGCGTGACCTGAAGAGCTGCGGTAGACATTAAAGATT	24785.4
TDG_TG_f1AG_f2ATGC_rep_9	23508	0	CGCAGCTCAGTATGCCTCGCGGAAGCGAGGCATGCTGAGCTGCGGTAGACATTAAAGATT	25398.4
TDG_TG_f1CG_f2AATA_rep_8	21365	0	CGCAGCTCCGTAATACTCGCGGAAGCGAGTATTGCGGAGCTGCGGTAGACATTAAAGATT	23096.8
TDG_TG_f1CT_f2TGCC_rep_5	20449	0	CGCAGCTCCTTTGCCCTCGCGGAAGCGAGGGCAGAGGAGCTGCGGTAGACATTAAAGATT	22123.2
TDG_TG_H_M1TA_M2TA_rep_1	20045	0	CGCAGCTCATTTTATCTCGCGGAAGCGAGATAAGATGAGCTGCGGTAGACATTAAAGATT	21609.5
TDG_ff_TG_M_f1TC_f2AT_rep_3	23222	0	CGCAGCTCTTTAGGTATCGCGGAAGCGATACCTGAAGAGCTGCGGTAGACATTAAAGATT	24702.5
TDG_TG_f1TC_f2GGAT_rep_5	24790	0	CGCAGCTCTCTGGATCTCGCGGAAGCGAGATCCGGAGAGCTGCGGTAGACATTAAAGATT	26269.5
TDG_TG_f1TC_f2CCCT_rep_3	20236	0	CGCAGCTCTCTCCCTCTCGCGGAAGCGAGAGGGGGAGAGCTGCGGTAGACATTAAAGATT	21460.5
TDG_TG_f1AA_f2CTGG_rep_2	20387	0	CGCAGCTCAATCTGGCTCGCGGAAGCGAGCCAGGTTGAGCTGCGGTAGACATTAAAGATT	21732.2
TDG_TG_f1GC_f2CCAA_rep_1	20045	0	CGCAGCTCGCTCCAACTCGCGGAAGCGAGTTGGGGCGAGCTGCGGTAGACATTAAAGATT	21402.8
TDG_TG_f1AA_f2AACT_rep_7	21863	0	CGCAGCTCAATAACTCTCGCGGAAGCGAGAGTTGTTGAGCTGCGGTAGACATTAAAGATT	22958.5
TDG_ff_TG_H_f1GT_f2TA_rep_4	29199	0	CGCAGCGTAGTGTATTACGCGGAAGCGTAATACGCTACGCTGCGGTAGACATTAAAGATT	30830.4
TDG_TG_f1GG_f2TGTA_rep_2	21891	0	CGCAGCTCGGTTGTACTCGCGGAAGCGAGTACAGCCGAGCTGCGGTAGACATTAAAGATT	23084.8
TDG_TG_f1AC_f2TTAG_rep_7	20433	0	CGCAGCTCACTTTAGCTCGCGGAAGCGAGCTAAGGTGAGCTGCGGTAGACATTAAAGATT	21494.6
TDG_TG_f1GG_f2CGAA_rep_9	24901	0	CGCAGCTCGGTCGAACTCGCGGAAGCGAGTTCGGCCGAGCTGCGGTAGACATTAAAGATT	26148.8
TDG_TG_f1GA_f2ACGA_rep_6	22408	0	CGCAGCTCGATACGACTCGCGGAAGCGAGTCGTGTCGAGCTGCGGTAGACATTAAAGATT	23402.6
TDG_TG_f1GT_f2GGGA_rep_1	26196	0	CGCAGCTCGTTGGGACTCGCGGAAGCGAGTCCCGACGAGCTGCGGTAGACATTAAAGATT	27259.4
TDG_TG_f1CC_f2GGTA_rep_8	26462	0	CGCAGCTCCCTGGTACTCGCGGAAGCGAGTACCGGGGAGCTGCGGTAGACATTAAAGATT	27466.8
TDG_ff_TG_M_f1TT_f2AC_rep_3	23124	0	CGCAGCTTTTTAGGTACCGCGGAAGCGGTACCTGAAAAGCTGCGGTAGACATTAAAGATT	23714.4
TDG_ff_TG_L_f1AT_f2GG_rep_7	23065	0	CGCAGCATCATTAGCGGCGCGGAAGCGCCGCTAGTGATGCTGCGGTAGACATTAAAGATT	23642.6
TDG_ff_TA_H_f1TC_f2GA_rep_5	22021	0	CGCAGCTCAGTGTATGACGCGGAAGCGTCATACACTGAGCTGCGGTAGACATTAAAGATT	22525.1
TDG_TG_H_M1CG_M2GA_rep_6	23686	0	CGCAGCTCACTGTATCTCGCGGAAGCGAGATAAGGTGAGCTGCGGTAGACATTAAAGATT	24281.8
TDG_TG_f1GA_f2ATTC_rep_3	22695	0	CGCAGCTCGATATTCCTCGCGGAAGCGAGGAATGTCGAGCTGCGGTAGACATTAAAGATT	23238.1
TDG_ff_TG_H_f1CT_f2CT_rep_6	29857	0	CGCAGCCTAGTGTATCTCGCGGAAGCGAGATACGCTAGGCTGCGGTAGACATTAAAGATT	30505.5
TDG_TG_f1TC_f2CTAA_rep_4	20849	0	CGCAGCTCTCTCTAACTCGCGGAAGCGAGTTAGGGAGAGCTGCGGTAGACATTAAAGATT	21381.3
TDG_TG_f1GC_f2CAAG_rep_2	20909	0	CGCAGCTCGCTCAAGCTCGCGGAAGCGAGCTTGGGCGAGCTGCGGTAGACATTAAAGATT	21344.7
TDG_TG_f1TC_f2GAGA_rep_3	26063	0	CGCAGCTCTCTGAGACTCGCGGAAGCGAGTCTCGGAGAGCTGCGGTAGACATTAAAGATT	26606.1
TDG_TG_L_M1CT_M2AG_rep_1	21140	0	CGCAGCTCCCTAAGCCTCGCGGAAGCGAGGCTGGTGGAGCTGCGGTAGACATTAAAGATT	21605.3
TDG_TG_f1AA_f2TCTG_rep_1	21217	0	CGCAGCTCAATTCTGCTCGCGGAAGCGAGCAGAGTTGAGCTGCGGTAGACATTAAAGATT	21736.5
TDG_ff_TG_L_f1GC_f2GG_rep_6	24771	0	CGCAGCGCCATTAGCGGCGCGGAAGCGCCGCTAGTGGCGCTGCGGTAGACATTAAAGATT	25479.6
TDG_TG_f1CC_f2GTAC_rep_4	27637	0	CGCAGCTCCCTGTACCTCGCGGAAGCGAGGTACGGGGAGCTGCGGTAGACATTAAAGATT	28481.5
TDG_TG_f1GT_f2CGAC_rep_3	21819	0	CGCAGCTCGTTCGACCTCGCGGAAGCGAGGTCGGACGAGCTGCGGTAGACATTAAAGATT	22711.7
TDG_ff_TA_H_f1CT_f2TC_rep_1	22325	0	CGCAGCCTAGTGTATTCCGCGGAAGCGGAATACACTAGGCTGCGGTAGACATTAAAGATT	23347.3
TDG_TG_f1GT_f2GAGT_rep_6	26053	0	CGCAGCTCGTTGAGTCTCGCGGAAGCGAGACTCGACGAGCTGCGGTAGACATTAAAGATT	27248.4
TDG_TG_f1TA_f2TTGC_rep_8	20781	0	CGCAGCTCTATTTGCCTCGCGGAAGCGAGGCAAGTAGAGCTGCGGTAGACATTAAAGATT	21715.3
TDG_TG_f1AT_f2TTCC_rep_7	21502	0	CGCAGCTCATTTTCCCTCGCGGAAGCGAGGGAAGATGAGCTGCGGTAGACATTAAAGATT	22611.6
TDG_TG_M_M1TC_M2GC_rep_4	23878	0	CGCAGCTCTTTGGGTCTCGCGGAAGCGAGACCCGCAGAGCTGCGGTAGACATTAAAGATT	25216.1
TDG_ff_TG_H_f1AC_f2TG_rep_6	31602	0	CGCAGCACAGTGTATTGCGCGGAAGCGCAATACGCTGTGCTGCGGTAGACATTAAAGATT	33479
TDG_TG_f1TA_f2AACA_rep_3	23487	0	CGCAGCTCTATAACACTCGCGGAAGCGAGTGTTGTAGAGCTGCGGTAGACATTAAAGATT	24794.9
TDG_TG_H_M1TG_M2GA_rep_8	20849	0	CGCAGCTCATTGTATCTCGCGGAAGCGAGATAAGGTGAGCTGCGGTAGACATTAAAGATT	21938.5
TDG_TG_f1CG_f2GTTA_rep_2	27208	0	CGCAGCTCCGTGTTACTCGCGGAAGCGAGTAACGCGGAGCTGCGGTAGACATTAAAGATT	28732.7
TDG_TG_f1TG_f2TGGC_rep_5	21148	0	CGCAGCTCTGTTGGCCTCGCGGAAGCGAGGCCAGCAGAGCTGCGGTAGACATTAAAGATT	22195.9
TDG_TG_f1GT_f2CAGC_rep_8	20021	0	CGCAGCTCGTTCAGCCTCGCGGAAGCGAGGCTGGACGAGCTGCGGTAGACATTAAAGATT	20973
TDG_TG_f1AG_f2GCTC_rep_4	27861	0	CGCAGCTCAGTGCTCCTCGCGGAAGCGAGGAGCGCTGAGCTGCGGTAGACATTAAAGATT	29113.6
TDG_ff_TA_H_f1GG_f2TA_rep_7	22069	0	CGCAGCGGAGTGTATTACGCGGAAGCGTAATACACTCCGCTGCGGTAGACATTAAAGATT	23182.1
TDG_TG_f1TG_f2CTAG_rep_9	23377	0	CGCAGCTCTGTCTAGCTCGCGGAAGCGAGCTAGGCAGAGCTGCGGTAGACATTAAAGATT	24448.6
TDG_TG_f1CC_f2CTCC_rep_2	23590	0	CGCAGCTCCCTCTCCCTCGCGGAAGCGAGGGAGGGGGAGCTGCGGTAGACATTAAAGATT	24527.1
TDG_TG_f1AA_f2GATC_rep_5	28665	0	CGCAGCTCAATGATCCTCGCGGAAGCGAGGATCGTTGAGCTGCGGTAGACATTAAAGATT	29773
TDG_ff_TG_H_f1AG_f2CT_rep_10	32676	0	CGCAGCAGAGTGTATCTCGCGGAAGCGAGATACGCTCTGCTGCGGTAGACATTAAAGATT	33964.4
TDG_TG_f1TG_f2TCGT_rep_8	20800	0	CGCAGCTCTGTTCGTCTCGCGGAAGCGAGACGAGCAGAGCTGCGGTAGACATTAAAGATT	21444.4
TDG_ff_TA_H_f1GG_f2CT_rep_4	22644	0	CGCAGCGGAGTGTATCTCGCGGAAGCGAGATACACTCCGCTGCGGTAGACATTAAAGATT	23262.4
TDG_TG_L_M1AT_M2AT_rep_9	22433	0	CGCAGCTCCATAAGCCTCGCGGAAGCGAGGCTTGTGGAGCTGCGGTAGACATTAAAGATT	22845.3
TDG_TG_f1GA_f2GGCA_rep_1	28808	0	CGCAGCTCGATGGCACTCGCGGAAGCGAGTGCCGTCGAGCTGCGGTAGACATTAAAGATT	29410.9
TDG_TG_f1GC_f2TGTA_rep_10	21359	0	CGCAGCTCGCTTGTACTCGCGGAAGCGAGTACAGGCGAGCTGCGGTAGACATTAAAGATT	21838
TDG_TG_f1AC_f2TCCG_rep_10	21030	0	CGCAGCTCACTTCCGCTCGCGGAAGCGAGCGGAGGTGAGCTGCGGTAGACATTAAAGATT	21681.5
TDG_ff_TG_H_f1TG_f2GA_rep_7	30181	0	CGCAGCTGAGTGTATGACGCGGAAGCGTCATACGCTCAGCTGCGGTAGACATTAAAGATT	31208.5
TDG_TG_f1TG_f2CGCT_rep_8	25622	0	CGCAGCTCTGTCGCTCTCGCGGAAGCGAGAGCGGCAGAGCTGCGGTAGACATTAAAGATT	26435.4
TDG_ff_TA_H_f1AT_f2GG_rep_8	24278	0	CGCAGCATAGTGTATGGCGCGGAAGCGCCATACACTATGCTGCGGTAGACATTAAAGATT	25034.5
TDG_TG_f1CA_f2GGTG_rep_3	29651	0	CGCAGCTCCATGGTGCTCGCGGAAGCGAGCACCGTGGAGCTGCGGTAGACATTAAAGATT	30293.1
TDG_TG_H_M1TG_M2CG_rep_4	20968	0	CGCAGCTCATTCTATCTCGCGGAAGCGAGATAGGGTGAGCTGCGGTAGACATTAAAGATT	21405.9
TDG_TG_f1GG_f2CCTA_rep_6	25263	0	CGCAGCTCGGTCCTACTCGCGGAAGCGAGTAGGGCCGAGCTGCGGTAGACATTAAAGATT	25908
TDG_TA_f1CT_f2CCAT_rep_5	21263	0	CGCAGCTCCTTCCATCTCGCGGAAGCGAGATGGAAGGAGCTGCGGTAGACATTAAAGATT	21827.6
TDG_ff_TG_H_f1CT_f2GT_rep_1	29839	0	CGCAGCCTAGTGTATGTCGCGGAAGCGACATACGCTAGGCTGCGGTAGACATTAAAGATT	30570.3
TDG_TG_L_M1GT_M2TG_rep_3	27007	0	CGCAGCTCCGTTAGCCTCGCGGAAGCGAGGCTGGTGGAGCTGCGGTAGACATTAAAGATT	27843.7
TDG_TG_f1AG_f2GGAT_rep_9	29385	0	CGCAGCTCAGTGGATCTCGCGGAAGCGAGATCCGCTGAGCTGCGGTAGACATTAAAGATT	30162.7
TDG_TG_f1GT_f2TGGG_rep_2	21700	0	CGCAGCTCGTTTGGGCTCGCGGAAGCGAGCCCAGACGAGCTGCGGTAGACATTAAAGATT	22340.2
TDG_TG_f1GG_f2CTGT_rep_2	24271	0	CGCAGCTCGGTCTGTCTCGCGGAAGCGAGACAGGCCGAGCTGCGGTAGACATTAAAGATT	25275.2
TDG_TG_f1GC_f2CAGT_rep_10	21631	0	CGCAGCTCGCTCAGTCTCGCGGAAGCGAGACTGGGCGAGCTGCGGTAGACATTAAAGATT	22815.7
TDG_ff_TG_M_f1TT_f2AT_rep_3	23733	0	CGCAGCTTTTTAGGTATCGCGGAAGCGATACCTGAAAAGCTGCGGTAGACATTAAAGATT	24934.4
TDG_ff_TA_H_f1GA_f2CG_rep_5	22518	0	CGCAGCGAAGTGTATCGCGCGGAAGCGCGATACACTTCGCTGCGGTAGACATTAAAGATT	23660
TDG_ff_TG_L_f1TG_f2AT_rep_3	25486	0	CGCAGCTGCATTAGCATCGCGGAAGCGATGCTAGTGCAGCTGCGGTAGACATTAAAGATT	26707.4
TDG_TG_f1CA_f2CTAG_rep_2	21310	0	CGCAGCTCCATCTAGCTCGCGGAAGCGAGCTAGGTGGAGCTGCGGTAGACATTAAAGATT	22055.8
TDG_TG_f1CG_f2AATC_rep_9	22271	0	CGCAGCTCCGTAATCCTCGCGGAAGCGAGGATTGCGGAGCTGCGGTAGACATTAAAGATT	23028.2
TDG_TG_f1TC_f2CGGC_rep_1	21242	0	CGCAGCTCTCTCGGCCTCGCGGAAGCGAGGCCGGGAGAGCTGCGGTAGACATTAAAGATT	21979.6
TDG_TG_f1CT_f2CCTA_rep_7	20957	0	CGCAGCTCCTTCCTACTCGCGGAAGCGAGTAGGGAGGAGCTGCGGTAGACATTAAAGATT	21668.1
TDG_TG_f1CA_f2CGCC_rep_7	23378	0	CGCAGCTCCATCGCCCTCGCGGAAGCGAGGGCGGTGGAGCTGCGGTAGACATTAAAGATT	24172.9
TDG_TG_f1TG_f2GTAG_rep_2	29412	0	CGCAGCTCTGTGTAGCTCGCGGAAGCGAGCTACGCAGAGCTGCGGTAGACATTAAAGATT	30432
TDG_TG_f1GA_f2ATAC_rep_5	24091	0	CGCAGCTCGATATACCTCGCGGAAGCGAGGTATGTCGAGCTGCGGTAGACATTAAAGATT	24861.8
TDG_TG_M_M1CC_M2CA_rep_10	21067	0	CGCAGCTCTCTCGGTCTCGCGGAAGCGAGACCAGCAGAGCTGCGGTAGACATTAAAGATT	21796.1
TDG_ff_TA_H_f1AA_f2CA_rep_5	23525	0	CGCAGCAAAGTGTATCACGCGGAAGCGTGATACACTTTGCTGCGGTAGACATTAAAGATT	24323.3
TDG_ff_TG_L_f1AG_f2CC_rep_8	26429	0	CGCAGCAGCATTAGCCCCGCGGAAGCGGGGCTAGTGCTGCTGCGGTAGACATTAAAGATT	27122.5
TDG_TG_f1CT_f2GGCC_rep_9	27057	0	CGCAGCTCCTTGGCCCTCGCGGAAGCGAGGGCCGAGGAGCTGCGGTAGACATTAAAGATT	27767
TDG_TG_L_M1TA_M2AT_rep_2	22810	0	CGCAGCTCCTTAAGCCTCGCGGAAGCGAGGCTTGAGGAGCTGCGGTAGACATTAAAGATT	23441.6
TDG_ff_TG_H_f1CG_f2TC_rep_9	30902	0	CGCAGCCGAGTGTATTCCGCGGAAGCGGAATACGCTCGGCTGCGGTAGACATTAAAGATT	31757.7
TDG_TG_f1AC_f2ATCC_rep_2	24603	0	CGCAGCTCACTATCCCTCGCGGAAGCGAGGGATGGTGAGCTGCGGTAGACATTAAAGATT	25233.8
TDG_TG_f1GT_f2TAAC_rep_8	21462	0	CGCAGCTCGTTTAACCTCGCGGAAGCGAGGTTAGACGAGCTGCGGTAGACATTAAAGATT	22012.3
TDG_TG_L_M1TG_M2TC_rep_9	20553	0	CGCAGCTCCTTTAGCCTCGCGGAAGCGAGGCTCGGGGAGCTGCGGTAGACATTAAAGATT	21266.7
TDG_TG_f1TT_f2CAGC_rep_4	21059	0	CGCAGCTCTTTCAGCCTCGCGGAAGCGAGGCTGGAAGAGCTGCGGTAGACATTAAAGATT	21826.5
TDG_TG_f1TC_f2GTTC_rep_10	27745	0	CGCAGCTCTCTGTTCCTCGCGGAAGCGAGGAACGGAGAGCTGCGGTAGACATTAAAGATT	28767.5
TDG_TG_f1AT_f2GGTG_rep_10	28957	0	CGCAGCTCATTGGTGCTCGCGGAAGCGAGCACCGATGAGCTGCGGTAGACATTAAAGATT	30002.5
TDG_TG_f1CT_f2CTAA_rep_4	21371	0	CGCAGCTCCTTCTAACTCGCGGAAGCGAGTTAGGAGGAGCTGCGGTAGACATTAAAGATT	22166.9
TDG_TG_f1GT_f2TCCA_rep_2	20996	0	CGCAGCTCGTTTCCACTCGCGGAAGCGAGTGGAGACGAGCTGCGGTAGACATTAAAGATT	21642.7
TDG_TG_f1AC_f2GTAC_rep_7	28256	0	CGCAGCTCACTGTACCTCGCGGAAGCGAGGTACGGTGAGCTGCGGTAGACATTAAAGATT	29297.4
TDG_TG_f1TA_f2GATA_rep_2	29859	0	CGCAGCTCTATGATACTCGCGGAAGCGAGTATCGTAGAGCTGCGGTAGACATTAAAGATT	31034.9
TDG_TG_f1TA_f2AGCC_rep_10	26509	0	CGCAGCTCTATAGCCCTCGCGGAAGCGAGGGCTGTAGAGCTGCGGTAGACATTAAAGATT	27517.3
TDG_TG_f1AC_f2AGGT_rep_4	23760	0	CGCAGCTCACTAGGTCTCGCGGAAGCGAGACCTGGTGAGCTGCGGTAGACATTAAAGATT	24512.7
TDG_TG_H_M1AG_M2AG_rep_1	21041	0	CGCAGCTCAATATATCTCGCGGAAGCGAGATAGGGTGAGCTGCGGTAGACATTAAAGATT	21737.4
TDG_ff_TG_M_f1AG_f2GC_rep_3	27834	0	CGCAGCAGTTTAGGTGCCGCGGAAGCGGCACCTGAACTGCTGCGGTAGACATTAAAGATT	28794.2
TDG_TG_f1GT_f2TTCT_rep_10	21779	0	CGCAGCTCGTTTTCTCTCGCGGAAGCGAGAGAAGACGAGCTGCGGTAGACATTAAAGATT	22418.6
TDG_TG_f1GA_f2TGAG_rep_4	22024	0	CGCAGCTCGATTGAGCTCGCGGAAGCGAGCTCAGTCGAGCTGCGGTAGACATTAAAGATT	22192.8
TDG_TG_f1TG_f2ATGA_rep_5	24418	0	CGCAGCTCTGTATGACTCGCGGAAGCGAGTCATGCAGAGCTGCGGTAGACATTAAAGATT	24393.3
TDG_TG_f1CC_f2CCAT_rep_6	23011	0	CGCAGCTCCCTCCATCTCGCGGAAGCGAGATGGGGGGAGCTGCGGTAGACATTAAAGATT	22951.3
TDG_TG_f1CG_f2GTTT_rep_8	27905	0	CGCAGCTCCGTGTTTCTCGCGGAAGCGAGAAACGCGGAGCTGCGGTAGACATTAAAGATT	27846.7
TDG_ff_TG_M_f1TT_f2AG_rep_6	24252	0	CGCAGCTTTTTAGGTAGCGCGGAAGCGCTACCTGAAAAGCTGCGGTAGACATTAAAGATT	24119.5
TDG_TG_f1CC_f2CCGA_rep_7	22869	0	CGCAGCTCCCTCCGACTCGCGGAAGCGAGTCGGGGGGAGCTGCGGTAGACATTAAAGATT	22754.6
TDG_TG_f1AT_f2CGCG_rep_10	23703	0	CGCAGCTCATTCGCGCTCGCGGAAGCGAGCGCGGATGAGCTGCGGTAGACATTAAAGATT	23554.7
TDG_TG_f1AT_f2ACTG_rep_8	24460	0	CGCAGCTCATTACTGCTCGCGGAAGCGAGCAGTGATGAGCTGCGGTAGACATTAAAGATT	24312
TDG_ff_TA_H_f1AG_f2TG_rep_9	27036	0	CGCAGCAGAGTGTATTGCGCGGAAGCGCAATACACTCTGCTGCGGTAGACATTAAAGATT	26690.8
TDG_TG_f1TG_f2GCGA_rep_4	28237	0	CGCAGCTCTGTGCGACTCGCGGAAGCGAGTCGCGCAGAGCTGCGGTAGACATTAAAGATT	27761.8
TDG_ff_TG_M_f1TA_f2CC_rep_5	25159	0	CGCAGCTATTTAGGTCCCGCGGAAGCGGGACCTGAATAGCTGCGGTAGACATTAAAGATT	24804.6
TDG_TG_f1TC_f2GGGG_rep_7	26624	0	CGCAGCTCTCTGGGGCTCGCGGAAGCGAGCCCCGGAGAGCTGCGGTAGACATTAAAGATT	26249
TDG_TG_f1TT_f2CAGG_rep_5	21082	0	CGCAGCTCTTTCAGGCTCGCGGAAGCGAGCCTGGAAGAGCTGCGGTAGACATTAAAGATT	20785.1
TDG_TG_f1TG_f2GGGT_rep_8	27965	0	CGCAGCTCTGTGGGTCTCGCGGAAGCGAGACCCGCAGAGCTGCGGTAGACATTAAAGATT	27571.1
TDG_TG_f1AG_f2CCGG_rep_3	24906	0	CGCAGCTCAGTCCGGCTCGCGGAAGCGAGCCGGGCTGAGCTGCGGTAGACATTAAAGATT	24555.2
TDG_TG_f1AA_f2TGGA_rep_3	21661	0	CGCAGCTCAATTGGACTCGCGGAAGCGAGTCCAGTTGAGCTGCGGTAGACATTAAAGATT	21355.9
TDG_TG_f1TG_f2GCTC_rep_1	26943	0	CGCAGCTCTGTGCTCCTCGCGGAAGCGAGGAGCGCAGAGCTGCGGTAGACATTAAAGATT	26563.5
TDG_TG_f1TT_f2ATTG_rep_8	20618	0	CGCAGCTCTTTATTGCTCGCGGAAGCGAGCAATGAAGAGCTGCGGTAGACATTAAAGATT	23297.3
TDG_TG_f1TT_f2CGTA_rep_10	19701	0	CGCAGCTCTTTCGTACTCGCGGAAGCGAGTACGGAAGAGCTGCGGTAGACATTAAAGATT	22261.1
TDG_TG_f1GC_f2CGCA_rep_6	21446	0	CGCAGCTCGCTCGCACTCGCGGAAGCGAGTGCGGGCGAGCTGCGGTAGACATTAAAGATT	24232.9
TDG_TG_f1GT_f2CCGA_rep_4	19570	0	CGCAGCTCGTTCCGACTCGCGGAAGCGAGTCGGGACGAGCTGCGGTAGACATTAAAGATT	22113.1
TDG_TG_L_M1CC_M2CA_rep_4	19126	0	CGCAGCTCCCTCAGCCTCGCGGAAGCGAGGCTAGCGGAGCTGCGGTAGACATTAAAGATT	21611.4
TDG_TG_f1GA_f2TGTG_rep_2	20165	0	CGCAGCTCGATTGTGCTCGCGGAAGCGAGCACAGTCGAGCTGCGGTAGACATTAAAGATT	22785.4
TDG_TG_M_M1CA_M2AG_rep_10	19036	0	CGCAGCTCTCTAGGTCTCGCGGAAGCGAGACCGGAAGAGCTGCGGTAGACATTAAAGATT	21529.8
TDG_TG_f1GA_f2AGCG_rep_7	23479	0	CGCAGCTCGATAGCGCTCGCGGAAGCGAGCGCTGTCGAGCTGCGGTAGACATTAAAGATT	26325.1
TDG_TG_M_M1AT_M2TG_rep_2	21383	0	CGCAGCTCTATTGGTCTCGCGGAAGCGAGACCGGTAGAGCTGCGGTAGACATTAAAGATT	23963.7
TDG_ff_TG_H_f1TA_f2TC_rep_6	27408	0	CGCAGCTAAGTGTATTCCGCGGAAGCGGAATACGCTTAGCTGCGGTAGACATTAAAGATT	30739.2
TDG_TF_TBP_rep_7	19559	0	CGCAGCTCTATAAAACTCGCGGAAGCGAGTTTTATAGAGCTGCGGTAGACATTAAAGATT	21901.9
TDG_TG_f1AA_f2ACAA_rep_9	20752	0	CGCAGCTCAATACAACTCGCGGAAGCGAGTTGTGTTGAGCTGCGGTAGACATTAAAGATT	23220.3
TDG_TG_f1CT_f2ATTA_rep_7	20951	0	CGCAGCTCCTTATTACTCGCGGAAGCGAGTAATGAGGAGCTGCGGTAGACATTAAAGATT	23426.3
TDG_ff_TG_M_f1CA_f2TC_rep_5	23444	0	CGCAGCCATTTAGGTTCCGCGGAAGCGGAACCTGAATGGCTGCGGTAGACATTAAAGATT	26213.8
TDG_TG_f1CC_f2CATG_rep_7	20021	0	CGCAGCTCCCTCATGCTCGCGGAAGCGAGCATGGGGGAGCTGCGGTAGACATTAAAGATT	22316.8
TDG_TG_f1TA_f2CGTC_rep_7	20061	0	CGCAGCTCTATCGTCCTCGCGGAAGCGAGGACGGTAGAGCTGCGGTAGACATTAAAGATT	22155.8
TDG_TG_f1TA_f2TATG_rep_4	19696	0	CGCAGCTCTATTATGCTCGCGGAAGCGAGCATAGTAGAGCTGCGGTAGACATTAAAGATT	21929.8
TDG_TG_M_M1TG_M2CC_rep_4	18630	0	CGCAGCTCTTTCGGTCTCGCGGAAGCGAGACCCGGAGAGCTGCGGTAGACATTAAAGATT	20841.9
TDG_ff_TG_M_f1GC_f2AA_rep_8	22896	0	CGCAGCGCTTTAGGTAACGCGGAAGCGTTACCTGAAGCGCTGCGGTAGACATTAAAGATT	25473.5
TDG_TG_M_M1TG_M2TC_rep_6	19057	0	CGCAGCTCTTTTGGTCTCGCGGAAGCGAGACCCGGAGAGCTGCGGTAGACATTAAAGATT	21176.9
TDG_TG_f1TT_f2CTAC_rep_6	19537	0	CGCAGCTCTTTCTACCTCGCGGAAGCGAGGTAGGAAGAGCTGCGGTAGACATTAAAGATT	21634.1
TDG_ff_TG_H_f1TC_f2GG_rep_7	28182	0	CGCAGCTCAGTGTATGGCGCGGAAGCGCCATACGCTGAGCTGCGGTAGACATTAAAGATT	31165.5
TDG_TG_f1AA_f2CTCC_rep_6	21774	0	CGCAGCTCAATCTCCCTCGCGGAAGCGAGGGAGGTTGAGCTGCGGTAGACATTAAAGATT	23907
TDG_TG_f1TG_f2CGAA_rep_4	21549	0	CGCAGCTCTGTCGAACTCGCGGAAGCGAGTTCGGCAGAGCTGCGGTAGACATTAAAGATT	23660
TDG_TG_f1AG_f2AAGG_rep_10	23185	0	CGCAGCTCAGTAAGGCTCGCGGAAGCGAGCCTTGCTGAGCTGCGGTAGACATTAAAGATT	25592.8
TDG_TG_f1CC_f2CAGT_rep_2	20011	0	CGCAGCTCCCTCAGTCTCGCGGAAGCGAGACTGGGGGAGCTGCGGTAGACATTAAAGATT	22120.7
TDG_TG_H_M1TC_M2TC_rep_10	19160	0	CGCAGCTCATTTTATCTCGCGGAAGCGAGATACGCTGAGCTGCGGTAGACATTAAAGATT	21033.6
TDG_TG_H_M1GT_M2CG_rep_10	22125	0	CGCAGCTCAGTCTATCTCGCGGAAGCGAGATAGGTTGAGCTGCGGTAGACATTAAAGATT	24269.9
TDG_TG_f1CT_f2CTGC_rep_8	19770	0	CGCAGCTCCTTCTGCCTCGCGGAAGCGAGGCAGGAGGAGCTGCGGTAGACATTAAAGATT	21892.1
TDG_TG_f1AG_f2AGAT_rep_1	25695	0	CGCAGCTCAGTAGATCTCGCGGAAGCGAGATCTGCTGAGCTGCGGTAGACATTAAAGATT	28267.9
TDG_TG_f1GT_f2TCAC_rep_10	19646	0	CGCAGCTCGTTTCACCTCGCGGAAGCGAGGTGAGACGAGCTGCGGTAGACATTAAAGATT	21544.6
TDG_ff_TG_L_f1TT_f2AC_rep_9	20118	0	CGCAGCTTCATTAGCACCGCGGAAGCGGTGCTAGTGAAGCTGCGGTAGACATTAAAGATT	22176.3
TDG_TG_M_M1CC_M2GG_rep_8	19555	0	CGCAGCTCTCTGGGTCTCGCGGAAGCGAGACCGGCAGAGCTGCGGTAGACATTAAAGATT	21657.6
TDG_TG_f1AT_f2AATT_rep_4	21640	0	CGCAGCTCATTAATTCTCGCGGAAGCGAGAATTGATGAGCTGCGGTAGACATTAAAGATT	23895.2
TDG_TG_f1GC_f2ACGT_rep_5	22037	0	CGCAGCTCGCTACGTCTCGCGGAAGCGAGACGTGGCGAGCTGCGGTAGACATTAAAGATT	24481.5
TDG_TG_f1TA_f2AACC_rep_1	21895	0	CGCAGCTCTATAACCCTCGCGGAAGCGAGGGTTGTAGAGCTGCGGTAGACATTAAAGATT	24465.7
TDG_ff_TG_H_f1GC_f2GG_rep_5	28812	0	CGCAGCGCAGTGTATGGCGCGGAAGCGCCATACGCTGCGCTGCGGTAGACATTAAAGATT	32205.4
TDG_ff_TG_L_f1AT_f2CA_rep_4	22583	0	CGCAGCATCATTAGCCACGCGGAAGCGTGGCTAGTGATGCTGCGGTAGACATTAAAGATT	25188
TDG_TG_L_M1CG_M2GC_rep_5	24099	0	CGCAGCTCCCTGAGCCTCGCGGAAGCGAGGCTCGGGGAGCTGCGGTAGACATTAAAGATT	26820.8
TDG_TG_f1AT_f2TCAT_rep_2	19800	0	CGCAGCTCATTTCATCTCGCGGAAGCGAGATGAGATGAGCTGCGGTAGACATTAAAGATT	21962.4
TDG_TG_f1CT_f2CCTT_rep_2	19492	0	CGCAGCTCCTTCCTTCTCGCGGAAGCGAGAAGGGAGGAGCTGCGGTAGACATTAAAGATT	21653.7
TDG_TG_f1TG_f2TCCT_rep_5	19976	0	CGCAGCTCTGTTCCTCTCGCGGAAGCGAGAGGAGCAGAGCTGCGGTAGACATTAAAGATT	21945.1
TDG_TG_f1AC_f2GGTA_rep_8	26116	0	CGCAGCTCACTGGTACTCGCGGAAGCGAGTACCGGTGAGCTGCGGTAGACATTAAAGATT	28690.4
TDG_TG_f1AG_f2CAAC_rep_6	22981	0	CGCAGCTCAGTCAACCTCGCGGAAGCGAGGTTGGCTGAGCTGCGGTAGACATTAAAGATT	25375.9
TDG_TG_f1AT_f2ACTA_rep_2	22434	0	CGCAGCTCATTACTACTCGCGGAAGCGAGTAGTGATGAGCTGCGGTAGACATTAAAGATT	24402.4
TDG_TG_f1AT_f2TACC_rep_2	20060	0	CGCAGCTCATTTACCCTCGCGGAAGCGAGGGTAGATGAGCTGCGGTAGACATTAAAGATT	21936.6
TDG_ff_TG_H_f1CT_f2GG_rep_6	27814	0	CGCAGCCTAGTGTATGGCGCGGAAGCGCCATACGCTAGGCTGCGGTAGACATTAAAGATT	29950.8
TDG_TG_H_M1CA_M2AG_rep_5	19896	0	CGCAGCTCACTATATCTCGCGGAAGCGAGATAGGATGAGCTGCGGTAGACATTAAAGATT	21757.2
TDG_TG_f1TT_f2CCGG_rep_7	20154	0	CGCAGCTCTTTCCGGCTCGCGGAAGCGAGCCGGGAAGAGCTGCGGTAGACATTAAAGATT	22021
TDG_TG_f1CT_f2CGGT_rep_7	20508	0	CGCAGCTCCTTCGGTCTCGCGGAAGCGAGACCGGAGGAGCTGCGGTAGACATTAAAGATT	22417.2
TDG_ff_TG_M_f1TG_f2TC_rep_7	23073	0	CGCAGCTGTTTAGGTTCCGCGGAAGCGGAACCTGAACAGCTGCGGTAGACATTAAAGATT	25231.4
TDG_TG_L_M1GG_M2GC_rep_2	24085	0	CGCAGCTCCGTGAGCCTCGCGGAAGCGAGGCTCGGGGAGCTGCGGTAGACATTAAAGATT	26304.1
TDG_TG_f1GG_f2GCTT_rep_10	26403	0	CGCAGCTCGGTGCTTCTCGCGGAAGCGAGAAGCGCCGAGCTGCGGTAGACATTAAAGATT	28835.6
TDG_TG_f1TC_f2ATCA_rep_8	23189	0	CGCAGCTCTCTATCACTCGCGGAAGCGAGTGATGGAGAGCTGCGGTAGACATTAAAGATT	25284.1
TDG_TG_f1TA_f2CACA_rep_10	20289	0	CGCAGCTCTATCACACTCGCGGAAGCGAGTGTGGTAGAGCTGCGGTAGACATTAAAGATT	22028.7
TDG_TG_f1CT_f2GTGT_rep_2	25420	0	CGCAGCTCCTTGTGTCTCGCGGAAGCGAGACACGAGGAGCTGCGGTAGACATTAAAGATT	27505.6
TDG_TG_H_M1CG_M2AA_rep_9	20763	0	CGCAGCTCACTATATCTCGCGGAAGCGAGATAAGGTGAGCTGCGGTAGACATTAAAGATT	22538.7
TDG_TG_f1TC_f2TTGT_rep_3	19616	0	CGCAGCTCTCTTTGTCTCGCGGAAGCGAGACAAGGAGAGCTGCGGTAGACATTAAAGATT	21413.4
TDG_TG_f1CA_f2CCGA_rep_5	20496	0	CGCAGCTCCATCCGACTCGCGGAAGCGAGTCGGGTGGAGCTGCGGTAGACATTAAAGATT	22366.8
TDG_TG_f1AT_f2TTTG_rep_5	20355	0	CGCAGCTCATTTTTGCTCGCGGAAGCGAGCAAAGATGAGCTGCGGTAGACATTAAAGATT	22204.8
TDG_TG_f1TT_f2AGGG_rep_4	23171	0	CGCAGCTCTTTAGGGCTCGCGGAAGCGAGCCCTGAAGAGCTGCGGTAGACATTAAAGATT	25085.3
TDG_TG_f1CA_f2TAGC_rep_1	20308	0	CGCAGCTCCATTAGCCTCGCGGAAGCGAGGCTAGTGGAGCTGCGGTAGACATTAAAGATT	21997.3
TDG_TG_f1GT_f2CAGT_rep_3	20264	0	CGCAGCTCGTTCAGTCTCGCGGAAGCGAGACTGGACGAGCTGCGGTAGACATTAAAGATT	21893.5
TDG_ff_TG_H_f1CG_f2AC_rep_6	29511	0	CGCAGCCGAGTGTATACCGCGGAAGCGGTATACGCTCGGCTGCGGTAGACATTAAAGATT	31903.1
TDG_TG_L_M1AA_M2GA_rep_7	20086	0	CGCAGCTCCATGAGCCTCGCGGAAGCGAGGCTAGAGGAGCTGCGGTAGACATTAAAGATT	21730.5
TDG_TG_f1AG_f2AGCG_rep_2	26447	0	CGCAGCTCAGTAGCGCTCGCGGAAGCGAGCGCTGCTGAGCTGCGGTAGACATTAAAGATT	28511.2
TDG_TG_f1GA_f2TAAG_rep_9	20241	0	CGCAGCTCGATTAAGCTCGCGGAAGCGAGCTTAGTCGAGCTGCGGTAGACATTAAAGATT	21855.7
TDG_ff_TG_H_f1CA_f2TC_rep_1	29034	0	CGCAGCCAAGTGTATTCCGCGGAAGCGGAATACGCTTGGCTGCGGTAGACATTAAAGATT	30885
TDG_TG_f1TC_f2CATT_rep_2	19641	0	CGCAGCTCTCTCATTCTCGCGGAAGCGAGAATGGGAGAGCTGCGGTAGACATTAAAGATT	20829.5
TDG_TG_f1AA_f2ATGT_rep_3	21524	0	CGCAGCTCAATATGTCTCGCGGAAGCGAGACATGTTGAGCTGCGGTAGACATTAAAGATT	22944.2
TDG_TG_M_M1TC_M2AT_rep_8	20695	0	CGCAGCTCTTTAGGTCTCGCGGAAGCGAGACCTGCAGAGCTGCGGTAGACATTAAAGATT	22096.8
TDG_TG_H_M1AT_M2AC_rep_1	22762	0	CGCAGCTCAATATATCTCGCGGAAGCGAGATACGTTGAGCTGCGGTAGACATTAAAGATT	23902.6
TDG_TG_f1TT_f2CTGG_rep_1	20066	0	CGCAGCTCTTTCTGGCTCGCGGAAGCGAGCCAGGAAGAGCTGCGGTAGACATTAAAGATT	20993.7
TDG_TG_f1AT_f2AACC_rep_9	23026	0	CGCAGCTCATTAACCCTCGCGGAAGCGAGGGTTGATGAGCTGCGGTAGACATTAAAGATT	24312.5
TDG_TG_f1TC_f2CGCA_rep_10	22532	0	CGCAGCTCTCTCGCACTCGCGGAAGCGAGTGCGGGAGAGCTGCGGTAGACATTAAAGATT	23760.7
TDG_TG_f1CC_f2CGCC_rep_3	22718	0	CGCAGCTCCCTCGCCCTCGCGGAAGCGAGGGCGGGGGAGCTGCGGTAGACATTAAAGATT	23898.3
TDG_ff_TG_L_f1AA_f2AG_rep_6	23413	0	CGCAGCAACATTAGCAGCGCGGAAGCGCTGCTAGTGTTGCTGCGGTAGACATTAAAGATT	24586.2
TDG_ff_TG_H_f1CC_f2TA_rep_8	29645	0	CGCAGCCCAGTGTATTACGCGGAAGCGTAATACGCTGGGCTGCGGTAGACATTAAAGATT	30960.8
TDG_ff_TG_L_f1AC_f2GC_rep_8	24304	0	CGCAGCACCATTAGCGCCGCGGAAGCGGCGCTAGTGGTGCTGCGGTAGACATTAAAGATT	25290.6
TDG_TG_M_M1GT_M2TG_rep_6	25185	0	CGCAGCTCTGTTGGTCTCGCGGAAGCGAGACCGGTAGAGCTGCGGTAGACATTAAAGATT	26141.3
TDG_ff_TA_H_f1GA_f2GC_rep_9	22751	0	CGCAGCGAAGTGTATGCCGCGGAAGCGGCATACACTTCGCTGCGGTAGACATTAAAGATT	23331.8
TDG_TG_f1GT_f2TGGA_rep_2	20846	0	CGCAGCTCGTTTGGACTCGCGGAAGCGAGTCCAGACGAGCTGCGGTAGACATTAAAGATT	21368
TDG_TG_f1GG_f2TTTC_rep_7	22057	0	CGCAGCTCGGTTTTCCTCGCGGAAGCGAGGAAAGCCGAGCTGCGGTAGACATTAAAGATT	22561.9
TDG_TG_f1TC_f2GGAT_rep_9	26554	0	CGCAGCTCTCTGGATCTCGCGGAAGCGAGATCCGGAGAGCTGCGGTAGACATTAAAGATT	27221.9
TDG_TG_f1AA_f2TATC_rep_8	21573	0	CGCAGCTCAATTATCCTCGCGGAAGCGAGGATAGTTGAGCTGCGGTAGACATTAAAGATT	22089.3
TDG_TG_f1CG_f2GAGC_rep_3	26347	0	CGCAGCTCCGTGAGCCTCGCGGAAGCGAGGCTCGCGGAGCTGCGGTAGACATTAAAGATT	26919.3
TDG_TG_f1TC_f2GTTC_rep_8	26106	0	CGCAGCTCTCTGTTCCTCGCGGAAGCGAGGAACGGAGAGCTGCGGTAGACATTAAAGATT	26712.3
TDG_TG_L_M1CG_M2AG_rep_7	20665	0	CGCAGCTCCCTAAGCCTCGCGGAAGCGAGGCTGGGGGAGCTGCGGTAGACATTAAAGATT	21095.7
TDG_TG_H_M1GA_M2TG_rep_8	20837	0	CGCAGCTCAGTTTATCTCGCGGAAGCGAGATAGGATGAGCTGCGGTAGACATTAAAGATT	21271.2
TDG_TG_f1CA_f2CATA_rep_2	21623	0	CGCAGCTCCATCATACTCGCGGAAGCGAGTATGGTGGAGCTGCGGTAGACATTAAAGATT	22098.9
TDG_TG_f1CC_f2CCAC_rep_9	22556	0	CGCAGCTCCCTCCACCTCGCGGAAGCGAGGTGGGGGGAGCTGCGGTAGACATTAAAGATT	23108.3
TDG_TG_f1GG_f2CTGA_rep_4	24368	0	CGCAGCTCGGTCTGACTCGCGGAAGCGAGTCAGGCCGAGCTGCGGTAGACATTAAAGATT	25065.1
TDG_TG_f1GA_f2ACAG_rep_9	22587	0	CGCAGCTCGATACAGCTCGCGGAAGCGAGCTGTGTCGAGCTGCGGTAGACATTAAAGATT	23277.1
TDG_TG_f1CT_f2GACA_rep_3	26498	0	CGCAGCTCCTTGACACTCGCGGAAGCGAGTGTCGAGGAGCTGCGGTAGACATTAAAGATT	27582.2
TDG_TG_f1TA_f2TTGG_rep_2	21089	0	CGCAGCTCTATTTGGCTCGCGGAAGCGAGCCAAGTAGAGCTGCGGTAGACATTAAAGATT	22054.7
TDG_TG_f1TG_f2TGAT_rep_5	21307	0	CGCAGCTCTGTTGATCTCGCGGAAGCGAGATCAGCAGAGCTGCGGTAGACATTAAAGATT	22284.7
TDG_ff_TG_L_f1GG_f2GA_rep_2	22915	0	CGCAGCGGCATTAGCGACGCGGAAGCGTCGCTAGTGCCGCTGCGGTAGACATTAAAGATT	24036.6
TDG_TG_f1CT_f2ACGA_rep_4	22913	0	CGCAGCTCCTTACGACTCGCGGAAGCGAGTCGTGAGGAGCTGCGGTAGACATTAAAGATT	23943.2
TDG_TG_f1CG_f2CACA_rep_5	22356	0	CGCAGCTCCGTCACACTCGCGGAAGCGAGTGTGGCGGAGCTGCGGTAGACATTAAAGATT	23509.6
TDG_TG_f1TT_f2CCTC_rep_2	21016	0	CGCAGCTCTTTCCTCCTCGCGGAAGCGAGGAGGGAAGAGCTGCGGTAGACATTAAAGATT	22193.7
TDG_TG_f1GC_f2ACTT_rep_5	23098	0	CGCAGCTCGCTACTTCTCGCGGAAGCGAGAAGTGGCGAGCTGCGGTAGACATTAAAGATT	24384.2
TDG_TG_f1TC_f2CGGC_rep_3	21419	0	CGCAGCTCTCTCGGCCTCGCGGAAGCGAGGCCGGGAGAGCTGCGGTAGACATTAAAGATT	22538.3
TDG_TG_f1AG_f2GAAC_rep_7	28570	0	CGCAGCTCAGTGAACCTCGCGGAAGCGAGGTTCGCTGAGCTGCGGTAGACATTAAAGATT	30171
TDG_TG_f1GC_f2GAGC_rep_3	25464	0	CGCAGCTCGCTGAGCCTCGCGGAAGCGAGGCTCGGCGAGCTGCGGTAGACATTAAAGATT	26725.7
TDG_TG_M_M1AA_M2CT_rep_2	20104	0	CGCAGCTCTATCGGTCTCGCGGAAGCGAGACCTGAAGAGCTGCGGTAGACATTAAAGATT	21060
TDG_TG_f1TG_f2TACG_rep_7	20417	0	CGCAGCTCTGTTACGCTCGCGGAAGCGAGCGTAGCAGAGCTGCGGTAGACATTAAAGATT	21335
TDG_TG_f1TA_f2ATTG_rep_4	22471	0	CGCAGCTCTATATTGCTCGCGGAAGCGAGCAATGTAGAGCTGCGGTAGACATTAAAGATT	23604.3
TDG_TG_f1TG_f2CAGT_rep_8	21509	0	CGCAGCTCTGTCAGTCTCGCGGAAGCGAGACTGGCAGAGCTGCGGTAGACATTAAAGATT	22494.9
TDG_TG_f1GA_f2AAGG_rep_1	23072	0	CGCAGCTCGATAAGGCTCGCGGAAGCGAGCCTTGTCGAGCTGCGGTAGACATTAAAGATT	23988.6
TDG_ff_TA_H_f1AA_f2AT_rep_10	23175	0	CGCAGCAAAGTGTATATCGCGGAAGCGATATACACTTTGCTGCGGTAGACATTAAAGATT	24070.8
TDG_TG_f1AA_f2GAGC_rep_9	28331	0	CGCAGCTCAATGAGCCTCGCGGAAGCGAGGCTCGTTGAGCTGCGGTAGACATTAAAGATT	29448.1
TDG_TG_f1GC_f2ACGA_rep_9	23274	0	CGCAGCTCGCTACGACTCGCGGAAGCGAGTCGTGGCGAGCTGCGGTAGACATTAAAGATT	24189
TDG_TG_f1CA_f2ATAC_rep_1	23864	0	CGCAGCTCCATATACCTCGCGGAAGCGAGGTATGTGGAGCTGCGGTAGACATTAAAGATT	24603.3
TDG_TG_H_M1AG_M2GG_rep_3	23596	0	CGCAGCTCAATGTATCTCGCGGAAGCGAGATAGGGTGAGCTGCGGTAGACATTAAAGATT	24029.7
TDG_TG_L_M1TA_M2GC_rep_10	25773	0	CGCAGCTCCTTGAGCCTCGCGGAAGCGAGGCTCGAGGAGCTGCGGTAGACATTAAAGATT	26351
TDG_ff_TG_L_f1CA_f2CC_rep_8	23031	0	CGCAGCCACATTAGCCCCGCGGAAGCGGGGCTAGTGTGGCTGCGGTAGACATTAAAGATT	23744.5
TDG_TG_f1GG_f2CACG_rep_6	25823	0	CGCAGCTCGGTCACGCTCGCGGAAGCGAGCGTGGCCGAGCTGCGGTAGACATTAAAGATT	26702.2
TDG_TG_H_M1GC_M2TG_rep_5	21642	0	CGCAGCTCAGTTTATCTCGCGGAAGCGAGATAGGCTGAGCTGCGGTAGACATTAAAGATT	22329
TDG_ff_TG_M_f1CG_f2CT_rep_1	24416	0	CGCAGCCGTTTAGGTCTCGCGGAAGCGAGACCTGAACGGCTGCGGTAGACATTAAAGATT	25176.8
TDG_TG_f1AG_f2CTGC_rep_3	24635	0	CGCAGCTCAGTCTGCCTCGCGGAAGCGAGGCAGGCTGAGCTGCGGTAGACATTAAAGATT	25168.5
TDG_TG_M_M1GT_M2CC_rep_3	22069	0	CGCAGCTCTGTCGGTCTCGCGGAAGCGAGACCCGTAGAGCTGCGGTAGACATTAAAGATT	22529.9
TDG_ff_TG_H_f1GT_f2AT_rep_6	31149	0	CGCAGCGTAGTGTATATCGCGGAAGCGATATACGCTACGCTGCGGTAGACATTAAAGATT	31944.2
TDG_TG_f1AA_f2ACAA_rep_10	22693	0	CGCAGCTCAATACAACTCGCGGAAGCGAGTTGTGTTGAGCTGCGGTAGACATTAAAGATT	23295.6
TDG_TG_L_M1CA_M2GC_rep_3	22731	0	CGCAGCTCCCTGAGCCTCGCGGAAGCGAGGCTCGAGGAGCTGCGGTAGACATTAAAGATT	23288.1
TDG_ff_TG_M_f1GC_f2TC_rep_5	24606	0	CGCAGCGCTTTAGGTTCCGCGGAAGCGGAACCTGAAGCGCTGCGGTAGACATTAAAGATT	25368.3
TDG_ff_TG_L_f1CT_f2AA_rep_2	22936	0	CGCAGCCTCATTAGCAACGCGGAAGCGTTGCTAGTGAGGCTGCGGTAGACATTAAAGATT	23543
TDG_TG_f1CG_f2CGGT_rep_10	22309	0	CGCAGCTCCGTCGGTCTCGCGGAAGCGAGACCGGCGGAGCTGCGGTAGACATTAAAGATT	22967.1
TDG_TG_H_M1AG_M2CG_rep_2	21187	0	CGCAGCTCAATCTATCTCGCGGAAGCGAGATAGGGTGAGCTGCGGTAGACATTAAAGATT	22063.6
TDG_TG_f1CA_f2GAGT_rep_7	28337	0	CGCAGCTCCATGAGTCTCGCGGAAGCGAGACTCGTGGAGCTGCGGTAGACATTAAAGATT	29536.7
TDG_TG_f1CC_f2ATTT_rep_2	22307	0	CGCAGCTCCCTATTTCTCGCGGAAGCGAGAAATGGGGAGCTGCGGTAGACATTAAAGATT	23528.7
TDG_TG_f1TA_f2GAGG_rep_4	28937	0	CGCAGCTCTATGAGGCTCGCGGAAGCGAGCCTCGTAGAGCTGCGGTAGACATTAAAGATT	30401.8
TDG_TG_f1CT_f2CCCT_rep_6	21204	0	CGCAGCTCCTTCCCTCTCGCGGAAGCGAGAGGGGAGGAGCTGCGGTAGACATTAAAGATT	22279.4
TDG_TG_M_M1TC_M2GG_rep_6	20446	0	CGCAGCTCTTTGGGTCTCGCGGAAGCGAGACCGGCAGAGCTGCGGTAGACATTAAAGATT	21425.8
TDG_ff_TG_L_f1TG_f2TA_rep_3	25363	0	CGCAGCTGCATTAGCTACGCGGAAGCGTAGCTAGTGCAGCTGCGGTAGACATTAAAGATT	26250.6
TDG_ff_TG_L_f1TC_f2GC_rep_6	21790	0	CGCAGCTCCATTAGCGCCGCGGAAGCGGCGCTAGTGGAGCTGCGGTAGACATTAAAGATT	22530.9
TDG_TG_f1GA_f2CCAG_rep_4	21623	0	CGCAGCTCGATCCAGCTCGCGGAAGCGAGCTGGGTCGAGCTGCGGTAGACATTAAAGATT	22373.8
TDG_TG_H_M1TT_M2TG_rep_4	20197	0	CGCAGCTCATTTTATCTCGCGGAAGCGAGATAGGTTGAGCTGCGGTAGACATTAAAGATT	20882.3
TDG_TG_f1CT_f2TAAC_rep_8	21165	0	CGCAGCTCCTTTAACCTCGCGGAAGCGAGGTTAGAGGAGCTGCGGTAGACATTAAAGATT	21884.6
TDG_TG_f1CT_f2GTAC_rep_4	27859	0	CGCAGCTCCTTGTACCTCGCGGAAGCGAGGTACGAGGAGCTGCGGTAGACATTAAAGATT	28825.1
TDG_TG_f1AG_f2TGTA_rep_5	22578	0	CGCAGCTCAGTTGTACTCGCGGAAGCGAGTACAGCTGAGCTGCGGTAGACATTAAAGATT	23300.4
TDG_TG_f1CA_f2GTCG_rep_10	30012	0	CGCAGCTCCATGTCGCTCGCGGAAGCGAGCGACGTGGAGCTGCGGTAGACATTAAAGATT	31050.7
TDG_TG_f1GG_f2ATCT_rep_4	27135	0	CGCAGCTCGGTATCTCTCGCGGAAGCGAGAGATGCCGAGCTGCGGTAGACATTAAAGATT	28055.8
TDG_ff_TG_H_f1GT_f2GA_rep_2	31020	0	CGCAGCGTAGTGTATGACGCGGAAGCGTCATACGCTACGCTGCGGTAGACATTAAAGATT	31834
TDG_TG_f1AC_f2GTTA_rep_8	28554	0	CGCAGCTCACTGTTACTCGCGGAAGCGAGTAACGGTGAGCTGCGGTAGACATTAAAGATT	29303.3
TDG_TG_f1TA_f2TACG_rep_2	21697	0	CGCAGCTCTATTACGCTCGCGGAAGCGAGCGTAGTAGAGCTGCGGTAGACATTAAAGATT	22297.8
TDG_ff_TG_L_f1TC_f2CC_rep_4	22355	0	CGCAGCTCCATTAGCCCCGCGGAAGCGGGGCTAGTGGAGCTGCGGTAGACATTAAAGATT	22974
TDG_TG_f1AA_f2ATCC_rep_6	25578	0	CGCAGCTCAATATCCCTCGCGGAAGCGAGGGATGTTGAGCTGCGGTAGACATTAAAGATT	26233.8
TDG_TG_f1TT_f2CTCT_rep_8	22415	0	CGCAGCTCTTTCTCTCTCGCGGAAGCGAGAGAGGAAGAGCTGCGGTAGACATTAAAGATT	22989.7
TDG_TG_f1CT_f2ATAA_rep_6	23478	0	CGCAGCTCCTTATAACTCGCGGAAGCGAGTTATGAGGAGCTGCGGTAGACATTAAAGATT	24293.3
TDG_TG_f1AT_f2AGAA_rep_3	25375	0	CGCAGCTCATTAGAACTCGCGGAAGCGAGTTCTGATGAGCTGCGGTAGACATTAAAGATT	26275.7
TDG_TG_f1TT_f2TGCC_rep_7	21649	0	CGCAGCTCTTTTGCCCTCGCGGAAGCGAGGGCAGAAGAGCTGCGGTAGACATTAAAGATT	22438
TDG_TG_f1CA_f2TCAG_rep_8	21245	0	CGCAGCTCCATTCAGCTCGCGGAAGCGAGCTGAGTGGAGCTGCGGTAGACATTAAAGATT	22028
TDG_TG_L_M1GT_M2AC_rep_6	23195	0	CGCAGCTCCGTAAGCCTCGCGGAAGCGAGGCTCGTGGAGCTGCGGTAGACATTAAAGATT	24049.9
TDG_TG_f1TT_f2CGAG_rep_3	21163	0	CGCAGCTCTTTCGAGCTCGCGGAAGCGAGCTCGGAAGAGCTGCGGTAGACATTAAAGATT	21927.1
TDG_ff_TG_L_f1TA_f2CG_rep_4	24011	0	CGCAGCTACATTAGCCGCGCGGAAGCGCGGCTAGTGTAGCTGCGGTAGACATTAAAGATT	24905.2
TDG_TG_f1TC_f2TCTC_rep_10	21038	0	CGCAGCTCTCTTCTCCTCGCGGAAGCGAGGAGAGGAGAGCTGCGGTAGACATTAAAGATT	21686
TDG_TG_f1TG_f2ATTG_rep_9	24064	0	CGCAGCTCTGTATTGCTCGCGGAAGCGAGCAATGCAGAGCTGCGGTAGACATTAAAGATT	24950.9
TDG_TG_L_M1TA_M2CA_rep_5	21253	0	CGCAGCTCCTTCAGCCTCGCGGAAGCGAGGCTAGAGGAGCTGCGGTAGACATTAAAGATT	22090
TDG_TG_f1TC_f2GTTT_rep_8	26678	0	CGCAGCTCTCTGTTTCTCGCGGAAGCGAGAAACGGAGAGCTGCGGTAGACATTAAAGATT	27692.8
TDG_ff_TA_H_f1AT_f2TG_rep_9	24434	0	CGCAGCATAGTGTATTGCGCGGAAGCGCAATACACTATGCTGCGGTAGACATTAAAGATT	25208
TDG_ff_TG_L_f1GG_f2CT_rep_10	22356	0	CGCAGCGGCATTAGCCTCGCGGAAGCGAGGCTAGTGCCGCTGCGGTAGACATTAAAGATT	23095.9
TDG_TG_f1CG_f2TGTT_rep_9	21369	0	CGCAGCTCCGTTGTTCTCGCGGAAGCGAGAACAGCGGAGCTGCGGTAGACATTAAAGATT	22106.2
TDG_TG_L_M1AA_M2AC_rep_4	21640	0	CGCAGCTCCATAAGCCTCGCGGAAGCGAGGCTCGAGGAGCTGCGGTAGACATTAAAGATT	22275.5
TDG_TG_f1CT_f2ACCC_rep_9	23862	0	CGCAGCTCCTTACCCCTCGCGGAAGCGAGGGGTGAGGAGCTGCGGTAGACATTAAAGATT	24044.9
TDG_TG_M_M1AA_M2TC_rep_4	22328	0	CGCAGCTCTATTGGTCTCGCGGAAGCGAGACCCGAAGAGCTGCGGTAGACATTAAAGATT	22305.4
TDG_TG_f1CT_f2TCGC_rep_3	22006	0	CGCAGCTCCTTTCGCCTCGCGGAAGCGAGGCGAGAGGAGCTGCGGTAGACATTAAAGATT	21948.9
TDG_TG_f1TG_f2AATT_rep_3	23998	0	CGCAGCTCTGTAATTCTCGCGGAAGCGAGAATTGCAGAGCTGCGGTAGACATTAAAGATT	23947.9
TDG_ff_TG_M_f1AT_f2AG_rep_10	26264	0	CGCAGCATTTTAGGTAGCGCGGAAGCGCTACCTGAAATGCTGCGGTAGACATTAAAGATT	26120.5
TDG_TG_f1GT_f2AACA_rep_5	24040	0	CGCAGCTCGTTAACACTCGCGGAAGCGAGTGTTGACGAGCTGCGGTAGACATTAAAGATT	23919.7
TDG_TG_f1CA_f2GCGC_rep_8	28948	0	CGCAGCTCCATGCGCCTCGCGGAAGCGAGGCGCGTGGAGCTGCGGTAGACATTAAAGATT	28766.8
TDG_TG_f1TT_f2TGAT_rep_7	22163	0	CGCAGCTCTTTTGATCTCGCGGAAGCGAGATCAGAAGAGCTGCGGTAGACATTAAAGATT	22028.9
TDG_ff_TG_L_f1TG_f2CA_rep_5	26412	0	CGCAGCTGCATTAGCCACGCGGAAGCGTGGCTAGTGCAGCTGCGGTAGACATTAAAGATT	26074.8
TDG_hyb_TG_f1AT_f2GCGC_rep_5	29283	0	TATTATTTATCGCAGATTGCGCCGCGGAAGCGGCGCGATCTGCGGTAGACATTAAAGATT	28790.2
TDG_TG_f1GC_f2TCCT_rep_5	21603	0	CGCAGCTCGCTTCCTCTCGCGGAAGCGAGAGGAGGCGAGCTGCGGTAGACATTAAAGATT	21298.7
TDG_TG_f1AC_f2TCCA_rep_9	22158	0	CGCAGCTCACTTCCACTCGCGGAAGCGAGTGGAGGTGAGCTGCGGTAGACATTAAAGATT	21845.9
TDG_TG_f1GG_f2TCAG_rep_6	22657	0	CGCAGCTCGGTTCAGCTCGCGGAAGCGAGCTGAGCCGAGCTGCGGTAGACATTAAAGATT	22337.9
TDG_TG_f1TG_f2CCAC_rep_5	23361	0	CGCAGCTCTGTCCACCTCGCGGAAGCGAGGTGGGCAGAGCTGCGGTAGACATTAAAGATT	23032
TDG_TG_L_M1CA_M2AT_rep_7	21131	0	CGCAGCTCCCTAAGCCTCGCGGAAGCGAGGCTTGAGGAGCTGCGGTAGACATTAAAGATT	20833.4
TDG_TG_f1AC_f2CAGG_rep_4	22218	0	CGCAGCTCACTCAGGCTCGCGGAAGCGAGCCTGGGTGAGCTGCGGTAGACATTAAAGATT	21905.1
TDG_ff_TG_M_f1AG_f2TA_rep_8	27418	0	CGCAGCAGTTTAGGTTACGCGGAAGCGTAACCTGAACTGCTGCGGTAGACATTAAAGATT	27031.8
TDG_TG_f1GA_f2CCGC_rep_5	21265	0	CGCAGCTCGATCCGCCTCGCGGAAGCGAGGCGGGTCGAGCTGCGGTAGACATTAAAGATT	20965.5
TDG_TG_f1AC_f2ATCG_rep_3	21998	0	CGCAGCTCACTATCGCTCGCGGAAGCGAGCGATGGTGAGCTGCGGTAGACATTAAAGATT	24856.6
TDG_TG_M_M1GG_M2CT_rep_5	19142	0	CGCAGCTCTGTCGGTCTCGCGGAAGCGAGACCTGGAGAGCTGCGGTAGACATTAAAGATT	21629.5
TDG_TG_f1GG_f2TATT_rep_9	19603	0	CGCAGCTCGGTTATTCTCGCGGAAGCGAGAATAGCCGAGCTGCGGTAGACATTAAAGATT	22150.4
TDG_TG_f1CC_f2GTTG_rep_5	24733	0	CGCAGCTCCCTGTTGCTCGCGGAAGCGAGCAACGGGGAGCTGCGGTAGACATTAAAGATT	27947
TDG_TG_f1CG_f2AATT_rep_6	20020	0	CGCAGCTCCGTAATTCTCGCGGAAGCGAGAATTGCGGAGCTGCGGTAGACATTAAAGATT	22621.6
TDG_TG_f1AG_f2AAGG_rep_2	22526	0	CGCAGCTCAGTAAGGCTCGCGGAAGCGAGCCTTGCTGAGCTGCGGTAGACATTAAAGATT	25453.2
TDG_TG_f1CC_f2CTTT_rep_3	19976	0	CGCAGCTCCCTCTTTCTCGCGGAAGCGAGAAAGGGGGAGCTGCGGTAGACATTAAAGATT	22571.9
TDG_TG_f1GT_f2TTGG_rep_5	19591	0	CGCAGCTCGTTTTGGCTCGCGGAAGCGAGCCAAGACGAGCTGCGGTAGACATTAAAGATT	22136.8
TDG_TG_f1AT_f2CACG_rep_4	20197	0	CGCAGCTCATTCACGCTCGCGGAAGCGAGCGTGGATGAGCTGCGGTAGACATTAAAGATT	22842.9
TDG_TG_f1AA_f2ACAC_rep_1	20773	0	CGCAGCTCAATACACCTCGCGGAAGCGAGGTGTGTTGAGCTGCGGTAGACATTAAAGATT	23291.1
TDG_TG_f1AG_f2AAAA_rep_9	22305	0	CGCAGCTCAGTAAAACTCGCGGAAGCGAGTTTTGCTGAGCTGCGGTAGACATTAAAGATT	24997
TDG_TG_f1TG_f2GTAC_rep_5	26367	0	CGCAGCTCTGTGTACCTCGCGGAAGCGAGGTACGCAGAGCTGCGGTAGACATTAAAGATT	29571.6
TDG_TG_f1TT_f2ACTG_rep_9	20826	0	CGCAGCTCTTTACTGCTCGCGGAAGCGAGCAGTGAAGAGCTGCGGTAGACATTAAAGATT	23320.7
TDG_ff_TA_H_f1AT_f2GA_rep_7	22056	0	CGCAGCATAGTGTATGACGCGGAAGCGTCATACACTATGCTGCGGTAGACATTAAAGATT	24679.4
TDG_TG_f1AC_f2GTCT_rep_8	25451	0	CGCAGCTCACTGTCTCTCGCGGAAGCGAGAGACGGTGAGCTGCGGTAGACATTAAAGATT	28458
TDG_ff_TG_H_f1AT_f2CG_rep_3	28194	0	CGCAGCATAGTGTATCGCGCGGAAGCGCGATACGCTATGCTGCGGTAGACATTAAAGATT	31525
TDG_TG_f1AA_f2AGCA_rep_7	24934	0	CGCAGCTCAATAGCACTCGCGGAAGCGAGTGCTGTTGAGCTGCGGTAGACATTAAAGATT	27793.2
TDG_TG_f1CA_f2CTTG_rep_1	19830	0	CGCAGCTCCATCTTGCTCGCGGAAGCGAGCAAGGTGGAGCTGCGGTAGACATTAAAGATT	21900.7
TDG_ff_TG_M_f1TC_f2GC_rep_2	22517	0	CGCAGCTCTTTAGGTGCCGCGGAAGCGGCACCTGAAGAGCTGCGGTAGACATTAAAGATT	25070.7
TDG_TG_f1AG_f2CCAC_rep_8	22990	0	CGCAGCTCAGTCCACCTCGCGGAAGCGAGGTGGGCTGAGCTGCGGTAGACATTAAAGATT	25719.6
TDG_TG_f1CA_f2GACC_rep_4	25542	0	CGCAGCTCCATGACCCTCGCGGAAGCGAGGGTCGTGGAGCTGCGGTAGACATTAAAGATT	28383.3
TDG_TG_f1GT_f2AGAA_rep_10	22236	0	CGCAGCTCGTTAGAACTCGCGGAAGCGAGTTCTGACGAGCTGCGGTAGACATTAAAGATT	24739.2
TDG_TG_f1TC_f2TAAC_rep_2	19473	0	CGCAGCTCTCTTAACCTCGCGGAAGCGAGGTTAGGAGAGCTGCGGTAGACATTAAAGATT	21639.2
TDG_TG_L_M1AA_M2GC_rep_1	21995	0	CGCAGCTCCATGAGCCTCGCGGAAGCGAGGCTCGAGGAGCTGCGGTAGACATTAAAGATT	24356
TDG_TG_f1TA_f2AGTT_rep_4	23300	0	CGCAGCTCTATAGTTCTCGCGGAAGCGAGAACTGTAGAGCTGCGGTAGACATTAAAGATT	25766.7
TDG_TG_H_M1CT_M2GA_rep_8	19921	0	CGCAGCTCACTGTATCTCGCGGAAGCGAGATAAGTTGAGCTGCGGTAGACATTAAAGATT	21998.6
TDG_TG_M_M1CA_M2GT_rep_7	21309	0	CGCAGCTCTCTGGGTCTCGCGGAAGCGAGACCTGAAGAGCTGCGGTAGACATTAAAGATT	23396.5
TDG_TG_L_M1TG_M2CA_rep_5	19124	0	CGCAGCTCCTTCAGCCTCGCGGAAGCGAGGCTAGGGGAGCTGCGGTAGACATTAAAGATT	20997.4
TDG_TG_f1TC_f2TGGG_rep_1	20018	0	CGCAGCTCTCTTGGGCTCGCGGAAGCGAGCCCAGGAGAGCTGCGGTAGACATTAAAGATT	22096.9
TDG_ff_TG_H_f1CG_f2TC_rep_2	28648	0	CGCAGCCGAGTGTATTCCGCGGAAGCGGAATACGCTCGGCTGCGGTAGACATTAAAGATT	31668.3
TDG_TG_f1CT_f2GGCC_rep_6	24751	0	CGCAGCTCCTTGGCCCTCGCGGAAGCGAGGGCCGAGGAGCTGCGGTAGACATTAAAGATT	27171.3
TDG_ff_TA_H_f1GG_f2CA_rep_7	21575	0	CGCAGCGGAGTGTATCACGCGGAAGCGTGATACACTCCGCTGCGGTAGACATTAAAGATT	23666.6
TDG_ff_TG_M_f1CA_f2AA_rep_4	24809	0	CGCAGCCATTTAGGTAACGCGGAAGCGTTACCTGAATGGCTGCGGTAGACATTAAAGATT	27472
TDG_TG_f1AC_f2TTTA_rep_2	19764	0	CGCAGCTCACTTTTACTCGCGGAAGCGAGTAAAGGTGAGCTGCGGTAGACATTAAAGATT	21743
TDG_TG_f1CC_f2ACGT_rep_4	20817	0	CGCAGCTCCCTACGTCTCGCGGAAGCGAGACGTGGGGAGCTGCGGTAGACATTAAAGATT	22828.7
TDG_TG_H_M1TG_M2TG_rep_9	18479	0	CGCAGCTCATTTTATCTCGCGGAAGCGAGATAGGGTGAGCTGCGGTAGACATTAAAGATT	20369.6
TDG_TG_f1TC_f2GAGG_rep_10	23825	0	CGCAGCTCTCTGAGGCTCGCGGAAGCGAGCCTCGGAGAGCTGCGGTAGACATTAAAGATT	26286.4
TDG_TG_f1CA_f2CGGA_rep_8	21125	0	CGCAGCTCCATCGGACTCGCGGAAGCGAGTCCGGTGGAGCTGCGGTAGACATTAAAGATT	23396.4
TDG_TG_f1TA_f2CACG_rep_5	20418	0	CGCAGCTCTATCACGCTCGCGGAAGCGAGCGTGGTAGAGCTGCGGTAGACATTAAAGATT	22545.8
TDG_TG_M_M1CC_M2AT_rep_2	20479	0	CGCAGCTCTCTAGGTCTCGCGGAAGCGAGACCTGCAGAGCTGCGGTAGACATTAAAGATT	22750.7
TDG_TG_f1TA_f2GTCC_rep_9	27890	0	CGCAGCTCTATGTCCCTCGCGGAAGCGAGGGACGTAGAGCTGCGGTAGACATTAAAGATT	31164.5
TDG_TG_f1GG_f2CATA_rep_3	22961	0	CGCAGCTCGGTCATACTCGCGGAAGCGAGTATGGCCGAGCTGCGGTAGACATTAAAGATT	25665.3
TDG_TG_f1GA_f2ACGG_rep_3	21427	0	CGCAGCTCGATACGGCTCGCGGAAGCGAGCCGTGTCGAGCTGCGGTAGACATTAAAGATT	23898.7
TDG_TG_f1GT_f2CCTC_rep_10	19589	0	CGCAGCTCGTTCCTCCTCGCGGAAGCGAGGAGGGACGAGCTGCGGTAGACATTAAAGATT	21801.4
TDG_TG_f1AC_f2CCTC_rep_10	20165	0	CGCAGCTCACTCCTCCTCGCGGAAGCGAGGAGGGGTGAGCTGCGGTAGACATTAAAGATT	22381.4
TDG_ff_TG_M_f1GC_f2CT_rep_7	22731	0	CGCAGCGCTTTAGGTCTCGCGGAAGCGAGACCTGAAGCGCTGCGGTAGACATTAAAGATT	25213.4
TDG_TG_f1TG_f2TGGC_rep_7	20242	0	CGCAGCTCTGTTGGCCTCGCGGAAGCGAGGCCAGCAGAGCTGCGGTAGACATTAAAGATT	22486.9
TDG_TG_M_M1AA_M2CT_rep_6	19841	0	CGCAGCTCTATCGGTCTCGCGGAAGCGAGACCTGAAGAGCTGCGGTAGACATTAAAGATT	21796.8
TDG_TG_f1TC_f2GGGC_rep_5	24878	0	CGCAGCTCTCTGGGCCTCGCGGAAGCGAGGCCCGGAGAGCTGCGGTAGACATTAAAGATT	27470.6
TDG_ff_TA_H_f1TG_f2CC_rep_5	21298	0	CGCAGCTGAGTGTATCCCGCGGAAGCGGGATACACTCAGCTGCGGTAGACATTAAAGATT	23166.7
TDG_TG_f1AA_f2TGTG_rep_5	20434	0	CGCAGCTCAATTGTGCTCGCGGAAGCGAGCACAGTTGAGCTGCGGTAGACATTAAAGATT	22345.6
TDG_ff_TG_L_f1CT_f2GC_rep_5	21325	0	CGCAGCCTCATTAGCGCCGCGGAAGCGGCGCTAGTGAGGCTGCGGTAGACATTAAAGATT	22963.3
TDG_TG_f1TT_f2TAAA_rep_3	19903	0	CGCAGCTCTTTTAAACTCGCGGAAGCGAGTTTAGAAGAGCTGCGGTAGACATTAAAGATT	21764.9
TDG_ff_TA_H_f1TG_f2TG_rep_4	21710	0	CGCAGCTGAGTGTATTGCGCGGAAGCGCAATACACTCAGCTGCGGTAGACATTAAAGATT	23721.2
TDG_TG_f1GC_f2AGGT_rep_10	22591	0	CGCAGCTCGCTAGGTCTCGCGGAAGCGAGACCTGGCGAGCTGCGGTAGACATTAAAGATT	24694.1
TDG_TG_f1TT_f2CACC_rep_10	20380	0	CGCAGCTCTTTCACCCTCGCGGAAGCGAGGGTGGAAGAGCTGCGGTAGACATTAAAGATT	22286.5
TDG_ff_TG_L_f1CG_f2GG_rep_8	22662	0	CGCAGCCGCATTAGCGGCGCGGAAGCGCCGCTAGTGCGGCTGCGGTAGACATTAAAGATT	24750
TDG_TG_f1AA_f2CAGC_rep_3	20651	0	CGCAGCTCAATCAGCCTCGCGGAAGCGAGGCTGGTTGAGCTGCGGTAGACATTAAAGATT	22553.7
TDG_TG_f1AA_f2AGGG_rep_3	23668	0	CGCAGCTCAATAGGGCTCGCGGAAGCGAGCCCTGTTGAGCTGCGGTAGACATTAAAGATT	25806.3
TDG_TG_M_M1TT_M2AT_rep_3	19890	0	CGCAGCTCTTTAGGTCTCGCGGAAGCGAGACCTGTAGAGCTGCGGTAGACATTAAAGATT	21595.5
TDG_TG_f1GA_f2CTCT_rep_8	21796	0	CGCAGCTCGATCTCTCTCGCGGAAGCGAGAGAGGTCGAGCTGCGGTAGACATTAAAGATT	23584.3
TDG_TG_f1TG_f2TCAT_rep_1	20010	0	CGCAGCTCTGTTCATCTCGCGGAAGCGAGATGAGCAGAGCTGCGGTAGACATTAAAGATT	21721.3
TDG_TG_f1GT_f2CAAG_rep_4	20362	0	CGCAGCTCGTTCAAGCTCGCGGAAGCGAGCTTGGACGAGCTGCGGTAGACATTAAAGATT	22227.8
TDG_TG_f1CT_f2ACAC_rep_1	21689	0	CGCAGCTCCTTACACCTCGCGGAAGCGAGGTGTGAGGAGCTGCGGTAGACATTAAAGATT	23668.7
TDG_TG_f1GG_f2ACAG_rep_9	23107	0	CGCAGCTCGGTACAGCTCGCGGAAGCGAGCTGTGCCGAGCTGCGGTAGACATTAAAGATT	25206.9
TDG_ff_TA_H_f1TA_f2AT_rep_9	21032	0	CGCAGCTAAGTGTATATCGCGGAAGCGATATACACTTAGCTGCGGTAGACATTAAAGATT	22769.5
TDG_TG_f1TA_f2ATGA_rep_1	21500	0	CGCAGCTCTATATGACTCGCGGAAGCGAGTCATGTAGAGCTGCGGTAGACATTAAAGATT	23288.5
[truncated: 58,098 more rows]

## Sheet: binding_NNTNNNN_raw_forARPCor
Name	raw_635signal	Flags	Sequence	Norm
[truncated: 59,774 more rows]
