# Supplementary material for: Mapping the sequence logic of DNA repair enzyme binding reveals mechanistic principles and evolutionary links
Source: Research Square preprint supplement (doi:10.21203/rs.3.rs-7972250/v1), 2025-11-10
Supplement: Supplementary file 3 [file a33da2ebc814a1cce319d27b.xlsx]

## Sheet: README
README – Description of Excel Sheets (UDG microarray data)
Each sheet corresponds to a different experiment or processing stage for UDG binding or excision data, as described below:
Sheet name	binding data	ARP (product formation)	Design (5' to 3' flanks around uracil damage with N=A/C/T/G, U=uracil damage)	uracil pair	Data type	Used in
1-binding_NNUNNN_UG_processed_normalized	V		NNUNNN	U:G	Processed & normalized (see Methods)	Main figures on UDG binding
2-binding_NNUNNN_UG_raw	V		NNUNNN	U:G	Raw
3-ARP_NNUNNN_UG_processed_normalized		V	NNUNNN	U:G	Processed & normalized (see Methods)	Correlation with binding (Supp. Fig. 4)
4-ARP_NNUNNN_raw		V	NNUNNN	U:G	Raw
5-binding_UNNNNN_UA_raw_for5thBaseInfluence	V		UNNNNN	U:A	Raw	Assessment of MGW influence on UDG binding (main, Fig. 4d), and used the extended flanks to assess broader sequence context effects (Supp. Fig. 5)
Notes:
Binding refers to fluorescent protein-binding measurements using fluorescein labeled human UDG on libraries containing uracils.
ARP (product formation) refers to labeling of abasic sites formed upon UDG excision, detected using the Aldehyde Reactive Probe.
Processed & normalized data includes MASLINER-corrected fluorescence values, background-subtracted and normalized across probes (see Methods).
Raw data includes the unprocessed median signal values from array scans.
The U:G mispair is a common product of cytosine deamination, while U:A reflects pairing after replication; both are substrates of UDG.

## Sheet: binding_NNUNNN_UG_processed_nor
Flanks	ln_FI_normalized
AAUAAA	10.6842
AAUAAC	10.3052
AAUAAG	10.2131
AAUAAT	10.5157
AAUACA	9.86104
AAUACC	9.67418
AAUACG	10.1741
AAUACT	10.006
AAUAGA	9.88418
AAUAGC	10.2453
AAUAGG	9.8465
AAUAGT	10.2914
AAUATA	11.05
AAUATC	10.8415
AAUATG	11.1111
AAUATT	11.1446
AAUCAA	9.27351
AAUCAC	9.52261
AAUCAG	9.36659
AAUCAT	9.43774
AAUCCA	9.13027
AAUCCC	8.34886
AAUCCG	9.14883
AAUCCT	9.07495
AAUCGA	9.35089
AAUCGC	8.80671
AAUCGG	9.35503
AAUCGT	9.37093
AAUCTA	9.73724
AAUCTC	9.75187
AAUCTG	9.92521
AAUCTT	9.48116
AAUGAA	10.0078
AAUGAC	9.59562
AAUGAG	9.15368
AAUGAT	9.58803
AAUGCA	9.65318
AAUGCC	9.50234
AAUGCG	9.5346
AAUGCT	9.66853
AAUGGA	9.46265
AAUGGC	9.43279
AAUGGG	9.40359
AAUGGT	9.30671
AAUGTA	10.0471
AAUGTC	10.1196
AAUGTG	10.5167
AAUGTT	10.0629
AAUTAA	9.34605
AAUTAC	9.16439
AAUTAG	9.22942
AAUTAT	9.32446
AAUTCA	9.0751
AAUTCC	9.27627
AAUTCG	9.32541
AAUTCT	9.02946
AAUTGA	9.04871
AAUTGC	8.96918
AAUTGG	9.10611
AAUTGT	9.08001
AAUTTA	9.66447
AAUTTC	9.78715
AAUTTG	9.8065
AAUTTT	9.71045
ACUAAA	9.76499
ACUAAC	9.42713
ACUAAG	9.34982
ACUAAT	9.63962
ACUACA	9.28506
ACUACC	8.8387
ACUACG	9.0475
ACUACT	9.17018
ACUAGA	8.98038
ACUAGC	8.62715
ACUAGG	8.84132
ACUAGT	8.88066
ACUATA	9.55322
ACUATC	9.40298
ACUATG	9.47068
ACUATT	9.47544
ACUCAA	8.29085
ACUCAC	8.32387
ACUCAG	8.4453
ACUCAT	8.33951
ACUCCA	7.70468
ACUCCC	6.49593
ACUCCG	8.54741
ACUCCT	8.07594
ACUCGA	8.36776
ACUCGC	8.70219
ACUCGG	8.17482
ACUCGT	8.18597
ACUCTA	8.90052
ACUCTC	8.19912
ACUCTG	8.78017
ACUCTT	9.11591
ACUGAA	9.08578
ACUGAC	8.42154
ACUGAG	8.43802
ACUGAT	7.4701
ACUGCA	8.56335
ACUGCC	7.55413
ACUGCG	8.7133
ACUGCT	9.02371
ACUGGA	8.26427
ACUGGC	8.77041
ACUGGG	8.96809
ACUGGT	7.74576
ACUGTA	9.20434
ACUGTC	9.27638
ACUGTG	9.03821
ACUGTT	9.2184
ACUTAA	8.98637
ACUTAC	8.36029
ACUTAG	8.43337
ACUTAT	8.69205
ACUTCA	8.38131
ACUTCC	7.73209
ACUTCG	7.86926
ACUTCT	8.38695
ACUTGA	8.09324
ACUTGC	8.37412
ACUTGG	8.37148
ACUTGT	8.14741
ACUTTA	9.10183
ACUTTC	8.13832
ACUTTG	8.98839
ACUTTT	8.81678
AGUAAA	10.9319
AGUAAC	10.6322
AGUAAG	10.3495
AGUAAT	10.6131
AGUACA	10.1088
AGUACC	9.88414
AGUACG	9.90159
AGUACT	10.0059
AGUAGA	10.0724
AGUAGC	9.9198
AGUAGG	9.76104
AGUAGT	10.207
AGUATA	10.3018
AGUATC	10.3166
AGUATG	10.5052
AGUATT	10.386
AGUCAA	9.23968
AGUCAC	8.95274
AGUCAG	9.02794
AGUCAT	9.33461
AGUCCA	8.9284
AGUCCC	8.92624
AGUCCG	8.62439
AGUCCT	8.95565
AGUCGA	9.10195
AGUCGC	8.9832
AGUCGG	9.06275
AGUCGT	8.9954
AGUCTA	9.2605
AGUCTC	9.19246
AGUCTG	9.12683
AGUCTT	9.1697
AGUGAA	9.52175
AGUGAC	9.1703
AGUGAG	9.15836
AGUGAT	9.43893
AGUGCA	9.56635
AGUGCC	9.32988
AGUGCG	9.21527
AGUGCT	9.50662
AGUGGA	9.34529
AGUGGC	9.55659
AGUGGG	8.99254
AGUGGT	9.32829
AGUGTA	9.73642
AGUGTC	9.43093
AGUGTG	9.8917
AGUGTT	9.66763
AGUTAA	9.3248
AGUTAC	8.80227
AGUTAG	8.74723
AGUTAT	9.29688
AGUTCA	8.53607
AGUTCC	8.99881
AGUTCG	8.75681
AGUTCT	8.75608
AGUTGA	8.70036
AGUTGC	9.02525
AGUTGG	8.39017
AGUTGT	8.94246
AGUTTA	9.24564
AGUTTC	9.27351
AGUTTG	9.12096
AGUTTT	9.12674
ATUAAA	10.1822
ATUAAC	9.92735
ATUAAG	10.0895
ATUAAT	10.1498
ATUACA	9.76112
ATUACC	9.69909
ATUACG	9.90241
ATUACT	9.86268
ATUAGA	9.68566
ATUAGC	9.612
ATUAGG	9.58335
ATUAGT	9.80052
ATUATA	10.7934
ATUATC	10.8139
ATUATG	10.9694
ATUATT	10.8495
ATUCAA	9.67032
ATUCAC	9.37765
ATUCAG	9.15486
ATUCAT	9.49423
ATUCCA	9.58911
ATUCCC	9.32142
ATUCCG	9.50508
ATUCCT	9.49298
ATUCGA	9.26246
ATUCGC	9.56522
ATUCGG	9.34029
ATUCGT	9.29022
ATUCTA	10.3345
ATUCTC	10.017
ATUCTG	10.5052
ATUCTT	9.97798
ATUGAA	9.45385
ATUGAC	9.32722
ATUGAG	9.12741
ATUGAT	9.34572
ATUGCA	9.29502
ATUGCC	9.30673
ATUGCG	9.14695
ATUGCT	9.30533
ATUGGA	9.29116
ATUGGC	9.08082
ATUGGG	9.04857
ATUGGT	9.05338
ATUGTA	10.1166
ATUGTC	10.0374
ATUGTG	9.98904
ATUGTT	9.86707
ATUTAA	8.90622
ATUTAC	9.25576
ATUTAG	9.03329
ATUTAT	8.90796
ATUTCA	8.96319
ATUTCC	8.78703
ATUTCG	8.78381
ATUTCT	8.88317
ATUTGA	8.60075
ATUTGC	8.80093
ATUTGG	7.82663
ATUTGT	8.96012
ATUTTA	9.62897
ATUTTC	9.71797
ATUTTG	9.56459
ATUTTT	9.52247
CAUAAA	10.3116
CAUAAC	10.0531
CAUAAG	9.77646
CAUAAT	9.95293
CAUACA	9.72067
CAUACC	9.56437
CAUACG	9.72709
CAUACT	9.59642
CAUAGA	9.54664
CAUAGC	9.61653
CAUAGG	9.43496
CAUAGT	9.8941
CAUATA	10.4666
CAUATC	10.3539
CAUATG	10.5181
CAUATT	10.678
CAUCAA	9.43969
CAUCAC	9.18026
CAUCAG	8.54606
CAUCAT	9.19339
CAUCCA	7.67693
CAUCCC	7.58287
CAUCCG	8.88489
CAUCCT	8.03899
CAUCGA	8.89943
CAUCGC	9.07143
CAUCGG	9.09898
CAUCGT	9.22591
CAUCTA	9.07676
CAUCTC	8.86427
CAUCTG	9.28423
CAUCTT	9.16938
CAUGAA	9.42207
CAUGAC	9.17489
CAUGAG	8.60105
CAUGAT	8.9674
CAUGCA	8.99333
CAUGCC	8.84115
CAUGCG	9.15511
CAUGCT	9.30309
CAUGGA	9.05803
CAUGGC	9.25956
CAUGGG	9.01688
CAUGGT	9.55587
CAUGTA	9.75203
CAUGTC	8.47078
CAUGTG	9.82753
CAUGTT	9.76038
CAUTAA	9.40708
CAUTAC	8.95033
CAUTAG	8.54449
CAUTAT	9.36538
CAUTCA	8.83838
CAUTCC	8.63001
CAUTCG	8.86231
CAUTCT	8.33632
CAUTGA	7.87793
CAUTGC	8.83476
CAUTGG	8.62184
CAUTGT	8.72732
CAUTTA	9.38828
CAUTTC	9.39049
CAUTTG	9.49241
CAUTTT	9.31875
CCUAAA	10.0083
CCUAAC	9.37859
CCUAAG	9.47516
CCUAAT	9.92623
CCUACA	9.18154
CCUACC	8.51214
CCUACG	9.00547
CCUACT	9.00525
CCUAGA	9.27351
CCUAGC	8.96611
CCUAGG	8.6339
CCUAGT	9.08019
CCUATA	9.76341
CCUATC	9.4755
CCUATG	9.77099
CCUATT	9.68076
CCUCAA	7.98797
CCUCAC	8.3198
CCUCAG	7.89227
CCUCAT	8.1667
CCUCCA	7.95078
CCUCCC	7.8703
CCUCCG	7.79819
CCUCCT	8.00662
CCUCGA	8.2056
CCUCGC	8.0925
CCUCGG	7.88547
CCUCGT	8.236
CCUCTA	8.83693
CCUCTC	8.83885
CCUCTG	8.88875
CCUCTT	8.21925
CCUGAA	7.61485
CCUGAC	8.30396
CCUGAG	7.4679
CCUGAT	9.04798
CCUGCA	8.84921
CCUGCC	8.56013
CCUGCG	7.86669
CCUGCT	8.36208
CCUGGA	7.33804
CCUGGC	8.84358
CCUGGG	7.34981
CCUGGT	8.72796
CCUGTA	8.8114
CCUGTC	8.09387
CCUGTG	8.95891
CCUGTT	8.9003
CCUTAA	8.42909
CCUTAC	8.18066
CCUTAG	6.82335
CCUTAT	8.35172
CCUTCA	8.34717
CCUTCC	7.34478
CCUTCG	8.41337
CCUTCT	7.82433
CCUTGA	7.0338
CCUTGC	8.35509
CCUTGG	8.14035
CCUTGT	7.82605
CCUTTA	8.78925
CCUTTC	8.58513
CCUTTG	8.85638
CCUTTT	9.16239
CGUAAA	11.002
CGUAAC	10.7018
CGUAAG	10.6123
CGUAAT	10.9787
CGUACA	10.2267
CGUACC	10.328
CGUACG	10.4317
CGUACT	10.5082
CGUAGA	10.2414
CGUAGC	10.3227
CGUAGG	9.99732
CGUAGT	10.2457
CGUATA	10.7192
CGUATC	10.862
CGUATG	10.8836
CGUATT	10.8844
CGUCAA	9.26869
CGUCAC	9.26598
CGUCAG	8.9519
CGUCAT	8.9678
CGUCCA	8.69148
CGUCCC	8.74365
CGUCCG	8.88522
CGUCCT	9.14907
CGUCGA	9.08796
CGUCGC	9.08935
CGUCGG	9.3216
CGUCGT	9.15638
CGUCTA	9.64961
CGUCTC	9.15687
CGUCTG	9.63717
CGUCTT	9.68324
CGUGAA	10.0576
CGUGAC	9.44963
CGUGAG	8.53932
CGUGAT	9.54071
CGUGCA	9.46
CGUGCC	9.67599
CGUGCG	9.77835
CGUGCT	9.70444
CGUGGA	9.43809
CGUGGC	9.50038
CGUGGG	9.32003
CGUGGT	9.4986
CGUGTA	10.1276
CGUGTC	9.7088
CGUGTG	10.0995
CGUGTT	9.9495
CGUTAA	9.14504
CGUTAC	9.27478
CGUTAG	8.85733
CGUTAT	9.42901
CGUTCA	9.32747
CGUTCC	9.02838
CGUTCG	8.74257
CGUTCT	8.97831
CGUTGA	8.96187
CGUTGC	9.03725
CGUTGG	9.03005
CGUTGT	8.86556
CGUTTA	9.47808
CGUTTC	9.3318
CGUTTG	9.53302
CGUTTT	9.78717
CTUAAA	10.1617
CTUAAC	9.80648
CTUAAG	9.67129
CTUAAT	10.0622
CTUACA	9.63338
CTUACC	9.56143
CTUACG	9.63695
CTUACT	9.34009
CTUAGA	9.5401
CTUAGC	9.21716
CTUAGG	9.47972
CTUAGT	9.84824
CTUATA	10.6105
CTUATC	10.516
CTUATG	10.9427
CTUATT	10.7042
CTUCAA	9.33828
CTUCAC	9.01201
CTUCAG	9.42459
CTUCAT	9.07431
CTUCCA	9.00233
CTUCCC	8.97881
CTUCCG	9.35838
CTUCCT	9.2132
CTUCGA	9.0947
CTUCGC	9.0475
CTUCGG	9.23888
CTUCGT	9.07922
CTUCTA	10.1368
CTUCTC	9.59779
CTUCTG	10.2054
CTUCTT	9.54061
CTUGAA	8.03229
CTUGAC	8.99548
CTUGAG	8.74527
CTUGAT	9.09317
CTUGCA	8.78532
CTUGCC	8.88352
CTUGCG	9.10851
CTUGCT	8.69919
CTUGGA	8.86593
CTUGGC	8.63
CTUGGG	8.83528
CTUGGT	8.78375
CTUGTA	9.80965
CTUGTC	9.48903
CTUGTG	9.77314
CTUGTT	9.4892
CTUTAA	8.83051
CTUTAC	5.12158
CTUTAG	8.91979
CTUTAT	9.11128
CTUTCA	7.90524
CTUTCC	8.46329
CTUTCG	7.79995
CTUTCT	8.15931
CTUTGA	8.75765
CTUTGC	8.44555
CTUTGG	8.70691
CTUTGT	8.83563
CTUTTA	9.37316
CTUTTC	8.94671
CTUTTG	9.4612
CTUTTT	9.0731
GAUAAA	10.6242
GAUAAC	10.2698
GAUAAG	10.2578
GAUAAT	10.381
GAUACA	9.66382
GAUACC	9.56402
GAUACG	9.6725
GAUACT	9.7809
GAUAGA	10.0023
GAUAGC	10.005
GAUAGG	9.74122
GAUAGT	10.1822
GAUATA	10.7117
GAUATC	10.6231
GAUATG	10.8854
GAUATT	10.8641
GAUCAA	9.46877
GAUCAC	9.47367
GAUCAG	9.64792
GAUCAT	9.1377
GAUCCA	8.93935
GAUCCC	7.71699
GAUCCG	9.19313
GAUCCT	8.71074
GAUCGA	9.27154
GAUCGC	9.16448
GAUCGG	9.04802
GAUCGT	9.19292
GAUCTA	9.51083
GAUCTC	9.13548
GAUCTG	9.62972
GAUCTT	9.49991
GAUGAA	9.57778
GAUGAC	9.28321
GAUGAG	8.91874
GAUGAT	9.22055
GAUGCA	9.50423
GAUGCC	9.44092
GAUGCG	9.34748
GAUGCT	9.12091
GAUGGA	9.44049
GAUGGC	9.48097
GAUGGG	9.11093
GAUGGT	9.44891
GAUGTA	10.1509
GAUGTC	9.90372
GAUGTG	10.2182
GAUGTT	9.83704
GAUTAA	9.01534
GAUTAC	8.60645
GAUTAG	8.63833
GAUTAT	9.58877
GAUTCA	9.40425
GAUTCC	9.19557
GAUTCG	9.27351
GAUTCT	8.95499
GAUTGA	8.94225
GAUTGC	9.61151
GAUTGG	9.11042
GAUTGT	8.99002
GAUTTA	9.61837
GAUTTC	9.65207
GAUTTG	9.76422
GAUTTT	9.58294
GCUAAA	9.90452
GCUAAC	9.33229
GCUAAG	9.27651
GCUAAT	9.79928
GCUACA	8.88681
GCUACC	9.01812
GCUACG	9.26556
GCUACT	8.6014
GCUAGA	8.97982
GCUAGC	9.0123
GCUAGG	8.89954
GCUAGT	9.39671
GCUATA	9.71307
GCUATC	9.85402
GCUATG	9.71207
GCUATT	9.85143
GCUCAA	9.09816
GCUCAC	8.34968
GCUCAG	8.42349
GCUCAT	8.75462
GCUCCA	8.50326
GCUCCC	2.83256
GCUCCG	8.54176
GCUCCT	7.49715
GCUCGA	8.29575
GCUCGC	8.24464
GCUCGG	8.80128
GCUCGT	7.93762
GCUCTA	8.81011
GCUCTC	9.27152
GCUCTG	9.07245
GCUCTT	8.47209
GCUGAA	8.82321
GCUGAC	7.89908
GCUGAG	8.487
GCUGAT	8.68851
GCUGCA	8.69734
GCUGCC	7.87814
GCUGCG	8.09392
GCUGCT	8.59609
GCUGGA	8.3882
GCUGGC	8.51579
GCUGGG	8.68303
GCUGGT	9.0715
GCUGTA	9.40927
GCUGTC	8.79121
GCUGTG	9.23788
GCUGTT	9.32615
GCUTAA	8.41288
GCUTAC	8.25963
GCUTAG	8.51571
GCUTAT	8.78936
GCUTCA	7.88409
GCUTCC	7.99762
GCUTCG	8.63713
GCUTCT	8.2485
GCUTGA	8.14141
GCUTGC	8.47819
GCUTGG	8.09665
GCUTGT	9.26911
GCUTTA	8.74821
GCUTTC	8.51986
GCUTTG	8.90084
GCUTTT	8.83419
GGUAAA	11.1177
GGUAAC	10.5986
GGUAAG	10.483
GGUAAT	10.8591
GGUACA	10.2114
GGUACC	10.1718
GGUACG	10.3055
GGUACT	10.0894
GGUAGA	10.1242
GGUAGC	10.0641
GGUAGG	9.90395
GGUAGT	10.4761
GGUATA	10.5541
GGUATC	10.6018
GGUATG	10.8938
GGUATT	10.5787
GGUCAA	9.37848
GGUCAC	9.28696
GGUCAG	9.15335
GGUCAT	9.04927
GGUCCA	9.13774
GGUCCC	8.94809
GGUCCG	8.79299
GGUCCT	9.18687
GGUCGA	9.04403
GGUCGC	9.35904
GGUCGG	9.29935
GGUCGT	9.09824
GGUCTA	9.56571
GGUCTC	9.24263
GGUCTG	9.61446
GGUCTT	9.31479
GGUGAA	9.73592
GGUGAC	9.55695
GGUGAG	9.12544
GGUGAT	9.49376
GGUGCA	9.34067
GGUGCC	9.45182
GGUGCG	9.39
GGUGCT	9.41357
GGUGGA	9.71849
GGUGGC	9.54976
GGUGGG	9.41573
GGUGGT	9.47035
GGUGTA	10.1283
GGUGTC	9.81501
GGUGTG	10.0552
GGUGTT	9.97881
GGUTAA	9.2061
GGUTAC	8.7143
GGUTAG	8.8105
GGUTAT	9.43816
GGUTCA	9.12646
GGUTCC	9.04415
GGUTCG	9.08569
GGUTCT	8.73954
GGUTGA	9.03617
GGUTGC	8.79496
GGUTGG	9.24766
GGUTGT	8.88158
GGUTTA	9.29673
GGUTTC	9.18477
GGUTTG	9.56003
GGUTTT	9.62358
GTUAAA	10.0907
GTUAAC	10.2259
GTUAAG	9.5576
GTUAAT	10.1318
GTUACA	9.6087
GTUACC	9.56688
GTUACG	9.66907
GTUACT	9.54941
GTUAGA	9.67356
GTUAGC	9.52219
GTUAGG	9.52342
GTUAGT	9.91082
GTUATA	10.4805
GTUATC	10.4223
GTUATG	10.8382
GTUATT	10.6646
GTUCAA	9.2847
GTUCAC	9.40996
GTUCAG	9.08878
GTUCAT	9.10157
GTUCCA	8.95999
GTUCCC	8.79457
GTUCCG	9.16324
GTUCCT	9.15332
GTUCGA	9.13468
GTUCGC	9.21048
GTUCGG	9.35774
GTUCGT	9.4346
GTUCTA	9.82659
GTUCTC	9.68423
GTUCTG	10.1578
GTUCTT	9.56815
GTUGAA	9.17926
GTUGAC	9.17457
GTUGAG	8.65004
GTUGAT	8.92903
GTUGCA	9.22324
GTUGCC	9.00015
GTUGCG	9.47532
GTUGCT	9.16765
GTUGGA	9.22924
GTUGGC	9.10655
GTUGGG	9.01248
GTUGGT	8.5859
GTUGTA	9.9911
GTUGTC	9.6961
GTUGTG	10.1136
GTUGTT	9.90137
GTUTAA	8.95159
GTUTAC	9.02463
GTUTAG	9.0076
GTUTAT	9.27002
GTUTCA	8.91508
GTUTCC	8.78378
GTUTCG	9.09543
GTUTCT	8.72808
GTUTGA	8.76798
GTUTGC	8.74047
GTUTGG	8.63538
GTUTGT	9.23804
GTUTTA	9.41577
GTUTTC	9.34813
GTUTTG	9.46177
GTUTTT	9.45619
TAUAAA	9.83884
TAUAAC	9.51575
TAUAAG	9.53778
TAUAAT	10.0339
TAUACA	9.46014
TAUACC	9.1555
TAUACG	8.90352
TAUACT	9.6789
TAUAGA	9.27351
TAUAGC	9.1894
TAUAGG	9.28242
TAUAGT	9.52825
TAUATA	10.2126
TAUATC	10.003
TAUATG	10.1492
TAUATT	10.1742
TAUCAA	8.98468
TAUCAC	9.15405
TAUCAG	8.85325
TAUCAT	8.9715
TAUCCA	8.73952
TAUCCC	8.78748
TAUCCG	8.70788
TAUCCT	8.55341
TAUCGA	9.00533
TAUCGC	8.93101
TAUCGG	9.10459
TAUCGT	8.79999
TAUCTA	8.86362
TAUCTC	8.84913
TAUCTG	9.39393
TAUCTT	9.58755
TAUGAA	9.25008
TAUGAC	8.78861
TAUGAG	8.5178
TAUGAT	8.48501
TAUGCA	9.03226
TAUGCC	9.09159
TAUGCG	9.1084
TAUGCT	9.45451
TAUGGA	9.048
TAUGGC	8.79321
TAUGGG	8.23852
TAUGGT	8.97199
TAUGTA	9.33693
TAUGTC	8.98507
TAUGTG	9.63787
TAUGTT	9.4486
TAUTAA	8.87012
TAUTAC	8.57958
TAUTAG	8.83675
TAUTAT	8.95657
TAUTCA	8.98339
TAUTCC	8.69287
TAUTCG	8.93841
TAUTCT	8.86938
TAUTGA	8.58385
TAUTGC	8.85363
TAUTGG	8.59268
TAUTGT	9.32524
TAUTTA	9.47384
TAUTTC	9.14027
TAUTTG	9.31677
TAUTTT	9.43071
TCUAAA	9.7304
TCUAAC	9.51314
TCUAAG	9.19039
TCUAAT	9.68809
TCUACA	9.05077
TCUACC	8.73263
TCUACG	8.87246
TCUACT	8.90115
TCUAGA	8.56821
TCUAGC	8.72989
TCUAGG	8.7454
TCUAGT	9.13952
TCUATA	9.43908
TCUATC	9.54261
TCUATG	9.55709
TCUATT	9.78082
TCUCAA	8.63058
TCUCAC	8.0167
TCUCAG	8.57247
TCUCAT	8.98028
TCUCCA	8.44214
TCUCCC	8.42202
TCUCCG	7.64084
TCUCCT	8.72312
TCUCGA	6.82108
TCUCGC	8.27743
TCUCGG	8.46051
TCUCGT	9.2192
TCUCTA	8.87572
TCUCTC	8.57651
TCUCTG	8.89572
TCUCTT	8.94978
TCUGAA	8.71837
TCUGAC	8.19157
TCUGAG	7.8422
TCUGAT	8.60405
TCUGCA	8.26395
TCUGCC	8.36356
TCUGCG	8.39095
TCUGCT	8.49879
TCUGGA	8.26007
TCUGGC	8.47535
TCUGGG	8.52988
TCUGGT	8.42918
TCUGTA	8.77027
TCUGTC	8.73082
TCUGTG	8.65332
TCUGTT	9.10127
TCUTAA	8.56045
TCUTAC	8.74391
TCUTAG	8.97872
TCUTAT	8.7215
TCUTCA	8.51534
TCUTCC	7.61733
TCUTCG	8.32612
TCUTCT	8.0998
TCUTGA	8.20913
TCUTGC	8.59033
TCUTGG	7.66758
TCUTGT	8.17581
TCUTTA	7.75991
TCUTTC	8.14688
TCUTTG	9.19934
TCUTTT	8.66779
TGUAAA	11.1516
TGUAAC	10.8859
TGUAAG	10.4895
TGUAAT	10.8374
TGUACA	10.2374
TGUACC	10.1473
TGUACG	10.1558
TGUACT	10.3526
TGUAGA	10.1258
TGUAGC	9.97911
TGUAGG	9.60747
TGUAGT	10.1021
TGUATA	10.6881
TGUATC	10.6112
TGUATG	10.7364
TGUATT	10.6094
TGUCAA	9.1194
TGUCAC	9.1152
TGUCAG	9.33821
TGUCAT	9.21801
TGUCCA	8.71457
TGUCCC	8.85611
TGUCCG	9.07408
TGUCCT	9.00045
TGUCGA	8.79353
TGUCGC	9.09267
TGUCGG	9.06812
TGUCGT	9.46703
TGUCTA	9.55122
TGUCTC	9.49088
TGUCTG	9.21466
TGUCTT	9.5938
TGUGAA	9.52537
TGUGAC	9.30322
TGUGAG	8.52093
TGUGAT	9.67497
TGUGCA	9.48963
TGUGCC	9.38918
TGUGCG	9.50061
TGUGCT	9.48525
TGUGGA	9.44191
TGUGGC	9.36054
TGUGGG	9.22488
TGUGGT	9.17042
TGUGTA	9.76142
TGUGTC	9.68278
TGUGTG	9.95505
TGUGTT	9.54852
TGUTAA	9.33019
TGUTAC	9.04672
TGUTAG	9.18024
TGUTAT	8.98043
TGUTCA	9.3153
TGUTCC	8.74973
TGUTCG	9.11696
TGUTCT	8.99734
TGUTGA	8.98281
TGUTGC	8.82002
TGUTGG	8.63146
TGUTGT	9.17785
TGUTTA	9.60593
TGUTTC	9.34461
TGUTTG	9.50378
TGUTTT	9.90468
TTUAAA	10.1531
TTUAAC	9.78379
TTUAAG	9.39307
TTUAAT	10.207
TTUACA	9.75962
TTUACC	9.57369
TTUACG	9.27351
TTUACT	9.6012
TTUAGA	9.84785
TTUAGC	9.34316
TTUAGG	9.22935
TTUAGT	9.9976
TTUATA	10.9022
TTUATC	10.7203
TTUATG	10.791
TTUATT	10.8905
TTUCAA	9.05769
TTUCAC	9.17617
TTUCAG	9.05406
TTUCAT	9.28404
TTUCCA	9.14551
TTUCCC	8.98073
TTUCCG	8.98918
TTUCCT	8.81373
TTUCGA	9.19443
TTUCGC	9.43256
TTUCGG	9.09135
TTUCGT	9.1766
TTUCTA	10.0822
TTUCTC	9.52972
TTUCTG	10.0213
TTUCTT	9.76035
TTUGAA	9.24583
TTUGAC	8.69695
TTUGAG	8.38553
TTUGAT	9.28722
TTUGCA	9.25408
TTUGCC	9.08675
TTUGCG	9.5801
TTUGCT	9.18943
TTUGGA	9.24251
TTUGGC	9.26582
TTUGGG	8.9962
TTUGGT	9.00858
TTUGTA	10.0414
TTUGTC	9.58786
TTUGTG	9.97559
TTUGTT	9.77252
TTUTAA	9.08161
TTUTAC	8.78001
TTUTAG	8.793
TTUTAT	8.99889
TTUTCA	8.59541
TTUTCC	7.86992
TTUTCG	8.56724
TTUTCT	8.68744
TTUTGA	8.97085
TTUTGC	8.47769
TTUTGG	8.7596
TTUTGT	8.82907
TTUTTA	9.67083
TTUTTC	9.39087
TTUTTG	9.66197
TTUTTT	9.24163

## Sheet: binding_NNUNNN_UG_raw
Name	Low_488scan	High_488scan	MASLINER_adj	Flags	Sequence	Norm
UDG_UG_f1GA_f2ACG	13012	34111	34111	0	CGCGAGCTCGAUACGCTCGCGGGAACGCGAGCGTGTCGAGCTCGCGACACTCTTTCCCTTTTTTTTTT	33692.5
UDG_UG_f1GG_f2GGT	10821	27983	27983	0	CGCGAGCTCGGUGGTCTCGCGGGAACGCGAGACCGCCGAGCTCGCGACACTCTTTCCCTTTTTTTTTT	27639.6
UDG_UG_f1CT_f2TTG	10553	28254	28254	0	CGCGAGCTCCTUTTGCTCGCGGGAACGCGAGCAAGAGGAGCTCGCGACACTCTTTCCCTTTTTTTTTT	27907.3
UDG_UG_f1CC_f2CTG	8618	22913	22913	0	CGCGAGCTCCCUCTGCTCGCGGGAACGCGAGCAGGGGGAGCTCGCGACACTCTTTCCCTTTTTTTTTT	22631.9
UDG_UG_f1CC_f2ACT	9650	25195	25195	0	CGCGAGCTCCCUACTCTCGCGGGAACGCGAGAGTGGGGAGCTCGCGACACTCTTTCCCTTTTTTTTTT	24885.9
UDG_UG_f1CG_f2CTC	10445	26569	26569	0	CGCGAGCTCCGUCTCCTCGCGGGAACGCGAGGAGGCGGAGCTCGCGACACTCTTTCCCTTTTTTTTTT	26243
UDG_UG_f1TT_f2CGC	9548	25465	25465	0	CGCGAGCTCTTUCGCCTCGCGGGAACGCGAGGCGGAAGAGCTCGCGACACTCTTTCCCTTTTTTTTTT	24878.7
UDG_UG_f1GC_f2CGT	5329	12715	12715	0	CGCGAGCTCGCUCGTCTCGCGGGAACGCGAGACGGGCGAGCTCGCGACACTCTTTCCCTTTTTTTTTT	12343.7
UDG_UG_f1TT_f2TCC	7818	20847	20847	0	CGCGAGCTCTTUTCCCTCGCGGGAACGCGAGGGAGAAGAGCTCGCGACACTCTTTCCCTTTTTTTTTT	19796.4
UDG_UG_f1CC_f2CTC	7350	18433	18433	0	CGCGAGCTCCCUCTCCTCGCGGGAACGCGAGGAGGGGGAGCTCGCGACACTCTTTCCCTTTTTTTTTT	17438.1
UDG_UG_f1CA_f2TCG	8992	23180	23180	0	CGCGAGCTCCAUTCGCTCGCGGGAACGCGAGCGAGTGGAGCTCGCGACACTCTTTCCCTTTTTTTTTT	22139.8
UDG_MM_AA	7129	18528	18528	0	CGCGAGCTCACACTTACCGCGGGAACGCGGTAAGAGTGAGCTCGCGACACTCTTTCCCTTTTTTTTTT	17653
UDG_UG_f1TG_f2ATA	33293	65535	100793	0	CGCGAGCTCTGUATACTCGCGGGAACGCGAGTATGCAGAGCTCGCGACACTCTTTCCCTTTTTTTTTT	96937.7
UDG_UG_f1AT_f2TGA	9180	24212	24212	0	CGCGAGCTCATUTGACTCGCGGGAACGCGAGTCAGATGAGCTCGCGACACTCTTTCCCTTTTTTTTTT	23285.9
UDG_UG_f1TT_f2GTC	14715	39122	39122	0	CGCGAGCTCTTUGTCCTCGCGGGAACGCGAGGACGAAGAGCTCGCGACACTCTTTCCCTTTTTTTTTT	37590.6
UDG_UG_f1AA_f2ACT	19769	51396	59832	0	CGCGAGCTCAAUACTCTCGCGGGAACGCGAGAGTGTTGAGCTCGCGACACTCTTTCCCTTTTTTTTTT	57489.9
UDG_UG_f1GT_f2AGA	14806	40059	40059	0	CGCGAGCTCGTUAGACTCGCGGGAACGCGAGTCTGACGAGCTCGCGACACTCTTTCCCTTTTTTTTTT	38040.3
UDG_UG_f1GC_f2GTA	13559	35117	35117	0	CGCGAGCTCGCUGTACTCGCGGGAACGCGAGTACGGCGAGCTCGCGACACTCTTTCCCTTTTTTTTTT	33088.5
UDG_UG_f1CC_f2TGA	9493	23395	23395	0	CGCGAGCTCCCUTGACTCGCGGGAACGCGAGTCAGGGGAGCTCGCGACACTCTTTCCCTTTTTTTTTT	21728.4
UDG_UG_f1GA_f2ACT	14710	37948	37948	0	CGCGAGCTCGAUACTCTCGCGGGAACGCGAGAGTGTCGAGCTCGCGACACTCTTTCCCTTTTTTTTTT	35074.6
UDG_UG_f1TG_f2ATG	31281	65535	94699	0	CGCGAGCTCTGUATGCTCGCGGGAACGCGAGCATGCAGAGCTCGCGACACTCTTTCCCTTTTTTTTTT	87348
UDG_UG_f1GG_f2GCA	16355	40863	40863	0	CGCGAGCTCGGUGCACTCGCGGGAACGCGAGTGCGCCGAGCTCGCGACACTCTTTCCCTTTTTTTTTT	37890.5
UDG_UG_random_5U	10360	26982	26982	0	CGCGCGAGUUAACUUUGCGCGGGAACGCGCGGGGTTGGCTCGCGCGACACTCTTTCCCTTTTTTTTTT	25279.2
UDG_UG_f1TA_f2ACC	10574	27883	27883	0	CGCGAGCTCTAUACCCTCGCGGGAACGCGAGGGTGTAGAGCTCGCGACACTCTTTCCCTTTTTTTTTT	26164.2
UDG_UG_f1TT_f2TAT	9954	26929	26929	0	CGCGAGCTCTTUTATCTCGCGGGAACGCGAGATAGAAGAGCTCGCGACACTCTTTCCCTTTTTTTTTT	25269
UDG_UG_f1AC_f2TTC	9762	26548	26548	0	CGCGAGCTCACUTTCCTCGCGGGAACGCGAGGAAGGTGAGCTCGCGACACTCTTTCCCTTTTTTTTTT	25158.1
UDG_UG_random_4U	6698	18186	18186	0	CGCGCUCUGUUCTGTCCCGCGGGAACGCGGGACAGGGCGGGGCGCGACACTCTTTCCCTTTTTTTTTT	17233.9
UDG_UG_f1TT_f2ATG	32743	65535	99127	0	CGCGAGCTCTTUATGCTCGCGGGAACGCGAGCATGAAGAGCTCGCGACACTCTTTCCCTTTTTTTTTT	93230.8
UDG_UG_f1CA_f2GAA	11073	29163	29163	0	CGCGAGCTCCAUGAACTCGCGGGAACGCGAGTTCGTGGAGCTCGCGACACTCTTTCCCTTTTTTTTTT	27636.2
UDG_UG_f1CC_f2TAT	9817	26285	26285	0	CGCGAGCTCCCUTATCTCGCGGGAACGCGAGATAGGGGAGCTCGCGACACTCTTTCCCTTTTTTTTTT	24948.3
UDG_random_6b_8	8780	23123	23123	0	CGCGAGCTCAATACACTCGCGGGAACGCGAGTGTATTGAGCTCGCGACACTCTTTCCCTTTTTTTTTT	22299.2
UDG_UG_f1GG_f2TCA	9168	24235	24235	0	CGCGAGCTCGGUTCACTCGCGGGAACGCGAGTGAGCCGAGCTCGCGACACTCTTTCCCTTTTTTTTTT	23647.8
UDG_UG_f1CT_f2GAG	7817	20002	20002	0	CGCGAGCTCCTUGAGCTCGCGGGAACGCGAGCTCGAGGAGCTCGCGACACTCTTTCCCTTTTTTTTTT	19602.3
UDG_UG_f1CA_f2GTC	12278	31581	31581	0	CGCGAGCTCCAUGTCCTCGCGGGAACGCGAGGACGTGGAGCTCGCGACACTCTTTCCCTTTTTTTTTT	31271.7
UDG_UG_f1AT_f2GTA	16302	44565	44565	0	CGCGAGCTCATUGTACTCGCGGGAACGCGAGTACGATGAGCTCGCGACACTCTTTCCCTTTTTTTTTT	44722.1
UDG_UG_f1GA_f2GTA	15716	40941	40941	0	CGCGAGCTCGAUGTACTCGCGGGAACGCGAGTACGTCGAGCTCGCGACACTCTTTCCCTTTTTTTTTT	41284.9
UDG_UG_f1GA_f2CTC	10363	26523	26523	0	CGCGAGCTCGAUCTCCTCGCGGGAACGCGAGGAGGTCGAGCTCGCGACACTCTTTCCCTTTTTTTTTT	26795.3
UDG_UG_f1TT_f2TTC	10198	27037	27037	0	CGCGAGCTCTTUTTCCTCGCGGGAACGCGAGGAAGAAGAGCTCGCGACACTCTTTCCCTTTTTTTTTT	27614.9
UDG_UG_f1TC_f2GCA	6501	16439	16439	0	CGCGAGCTCTCUGCACTCGCGGGAACGCGAGTGCGGAGAGCTCGCGACACTCTTTCCCTTTTTTTTTT	17444.1
UDG_UG_f1CT_f2CGC	9165	23261	23261	0	CGCGAGCTCCTUCGCCTCGCGGGAACGCGAGGCGGAGGAGCTCGCGACACTCTTTCCCTTTTTTTTTT	25141.3
UDG_UG_random_6U	5336	13641	13641	0	CGCGUCUCUUTUACUCCCGCGGGAACGCGGGGGTGAGGGGGGCGCGACACTCTTTCCCTTTTTTTTTT	14804.8
UDG_UG_f1CT_f2TAA	6970	18085	18085	0	CGCGAGCTCCTUTAACTCGCGGGAACGCGAGTTAGAGGAGCTCGCGACACTCTTTCCCTTTTTTTTTT	19862.4
UDG_UG_f1CG_f2AGT	17730	45210	45210	0	CGCGAGCTCCGUAGTCTCGCGGGAACGCGAGACTGCGGAGCTCGCGACACTCTTTCCCTTTTTTTTTT	49706.2
UDG_UG_f1GG_f2ACT	15012	38085	38085	0	CGCGAGCTCGGUACTCTCGCGGGAACGCGAGAGTGCCGAGCTCGCGACACTCTTTCCCTTTTTTTTTT	42704.2
UDG_UG_f1CG_f2GTC	9708	25293	25293	0	CGCGAGCTCCGUGTCCTCGCGGGAACGCGAGGACGCGGAGCTCGCGACACTCTTTCCCTTTTTTTTTT	28655.7
UDG_UG_f1GA_f2GTA	9479	24821	24821	0	CGCGAGCTCGAUGTACTCGCGGGAACGCGAGTACGTCGAGCTCGCGACACTCTTTCCCTTTTTTTTTT	28182.8
UDG_UG_f1TT_f2CGT	7817	20847	20847	0	CGCGAGCTCTTUCGTCTCGCGGGAACGCGAGACGGAAGAGCTCGCGACACTCTTTCCCTTTTTTTTTT	24008.1
UDG_UG_f1GA_f2AGC	10877	28541	28541	0	CGCGAGCTCGAUAGCCTCGCGGGAACGCGAGGCTGTCGAGCTCGCGACACTCTTTCCCTTTTTTTTTT	33198
UDG_UG_f1AA_f2CAC	8799	22912	22912	0	CGCGAGCTCAAUCACCTCGCGGGAACGCGAGGTGGTTGAGCTCGCGACACTCTTTCCCTTTTTTTTTT	27328.2
UDG_UG_f1CC_f2TAC	5943	16082	16082	0	CGCGAGCTCCCUTACCTCGCGGGAACGCGAGGTAGGGGAGCTCGCGACACTCTTTCCCTTTTTTTTTT	19348.9
UDG_UG_f1CG_f2TTA	7559	19765	19765	0	CGCGAGCTCCGUTTACTCGCGGGAACGCGAGTAAGCGGAGCTCGCGACACTCTTTCCCTTTTTTTTTT	24414.1
UDG_UG_f1CG_f2GTT	9184	22771	22771	0	CGCGAGCTCCGUGTTCTCGCGGGAACGCGAGAACGCGGAGCTCGCGACACTCTTTCCCTTTTTTTTTT	28211.6
UDG_UG_f1GT_f2CAT	7505	19754	19754	0	CGCGAGCTCGTUCATCTCGCGGGAACGCGAGATGGACGAGCTCGCGACACTCTTTCCCTTTTTTTTTT	24666.3
UDG_UG_f1AA_f2ACT	9602	24380	24380	0	CGCGAGCTCAAUACTCTCGCGGGAACGCGAGAGTGTTGAGCTCGCGACACTCTTTCCCTTTTTTTTTT	30953.5
UDG_UG_f1TT_f2TCT	5778	14704	14704	0	CGCGAGCTCTTUTCTCTCGCGGGAACGCGAGAGAGAAGAGCTCGCGACACTCTTTCCCTTTTTTTTTT	19066
UDG_UG_f1CT_f2GAC	6047	15681	15681	0	CGCGAGCTCCTUGACCTCGCGGGAACGCGAGGTCGAGGAGCTCGCGACACTCTTTCCCTTTTTTTTTT	21305.5
UDG_UG_f1GT_f2GAT	6265	15779	15779	0	CGCGAGCTCGTUGATCTCGCGGGAACGCGAGATCGACGAGCTCGCGACACTCTTTCCCTTTTTTTTTT	22082.3
UDG_UG_f1AC_f2CAT	7595	20415	20415	0	CGCGAGCTCACUCATCTCGCGGGAACGCGAGATGGGTGAGCTCGCGACACTCTTTCCCTTTTTTTTTT	29796
UDG_UG_f1AC_f2CCC	5944	15688	15688	0	CGCGAGCTCACUCCCCTCGCGGGAACGCGAGGGGGGTGAGCTCGCGACACTCTTTCCCTTTTTTTTTT	23449.6
UDG_UG_f1CG_f2ATA	15559	39632	39632	0	CGCGAGCTCCGUATACTCGCGGGAACGCGAGTATGCGGAGCTCGCGACACTCTTTCCCTTTTTTTTTT	61936.3
UDG_UG_f1GT_f2AAA	9760	25039	25039	0	CGCGAGCTCGTUAAACTCGCGGGAACGCGAGTTTGACGAGCTCGCGACACTCTTTCCCTTTTTTTTTT	42211.3
UDG_UG_f1CC_f2TTA	5647	14350	14350	0	CGCGAGCTCCCUTTACTCGCGGGAACGCGAGTAAGGGGAGCTCGCGACACTCTTTCCCTTTTTTTTTT	25253.9
UDG_UG_f1GG_f2ACC	9424	23991	23991	0	CGCGAGCTCGGUACCCTCGCGGGAACGCGAGGGTGCCGAGCTCGCGACACTCTTTCCCTTTTTTTTTT	43996.3
UDG_UG_f1AT_f2ACG	7776	19989	19989	0	CGCGAGCTCATUACGCTCGCGGGAACGCGAGCGTGATGAGCTCGCGACACTCTTTCCCTTTTTTTTTT	39389
UDG_UG_f1GT_f2AAT	6812	17195	17195	0	CGCGAGCTCGTUAATCTCGCGGGAACGCGAGATTGACGAGCTCGCGACACTCTTTCCCTTTTTTTTTT	33883.4
UDG_UG_f1AT_f2CTA	8530	21040	21040	0	CGCGAGCTCATUCTACTCGCGGGAACGCGAGTAGGATGAGCTCGCGACACTCTTTCCCTTTTTTTTTT	41460.1
UDG_UG_f1GG_f2TCG	4109	10203	10203	0	CGCGAGCTCGGUTCGCTCGCGGGAACGCGAGCGAGCCGAGCTCGCGACACTCTTTCCCTTTTTTTTTT	20105.4
UDG_UG_f1TA_f2GCC	3439	8810	8810	0	CGCGAGCTCTAUGCCCTCGCGGGAACGCGAGGGCGTAGAGCTCGCGACACTCTTTCCCTTTTTTTTTT	17360.4
UDG_UG_f1AA_f2TGT	3080	7672	7672	0	CGCGAGCTCAAUTGTCTCGCGGGAACGCGAGACAGTTGAGCTCGCGACACTCTTTCCCTTTTTTTTTT	15117.9
UDG_UG_f1CG_f2GAG	2578	6292	6292	0	CGCGAGCTCCGUGAGCTCGCGGGAACGCGAGCTCGCGGAGCTCGCGACACTCTTTCCCTTTTTTTTTT	12398.6
UDG_UG_f1GT_f2GCG	12673	36992	36992	0	CGCGAGCTCGTUGCGCTCGCGGGAACGCGAGCGCGACGAGCTCGCGACACTCTTTCCCTTTTTTTTTT	36538.1
UDG_UG_f1AA_f2TGC	10088	30693	30693	0	CGCGAGCTCAAUTGCCTCGCGGGAACGCGAGGCAGTTGAGCTCGCGACACTCTTTCCCTTTTTTTTTT	30316.4
UDG_UG_f1AT_f2GGC	9686	30079	30079	0	CGCGAGCTCATUGGCCTCGCGGGAACGCGAGGCCGATGAGCTCGCGACACTCTTTCCCTTTTTTTTTT	29709.9
UDG_UG_f1AT_f2TGC	8283	25755	25755	0	CGCGAGCTCATUTGCCTCGCGGGAACGCGAGGCAGATGAGCTCGCGACACTCTTTCCCTTTTTTTTTT	25439
UDG_UG_f1AG_f2GCT	10487	32135	32135	0	CGCGAGCTCAGUGCTCTCGCGGGAACGCGAGAGCGCTGAGCTCGCGACACTCTTTCCCTTTTTTTTTT	31740.7
UDG_UG_f1GC_f2CAA	6884	21290	21290	0	CGCGAGCTCGCUCAACTCGCGGGAACGCGAGTTGGGCGAGCTCGCGACACTCTTTCCCTTTTTTTTTT	21028.8
UDG_UG_f1TC_f2TGT	6578	19031	19031	0	CGCGAGCTCTCUTGTCTCGCGGGAACGCGAGACAGGAGAGCTCGCGACACTCTTTCCCTTTTTTTTTT	18592.8
UDG_UG_f1GG_f2CCG	10697	31889	31889	0	CGCGAGCTCGGUCCGCTCGCGGGAACGCGAGCGGGCCGAGCTCGCGACACTCTTTCCCTTTTTTTTTT	30957.8
UDG_UG_f1CC_f2TAC	7782	23520	23520	0	CGCGAGCTCCCUTACCTCGCGGGAACGCGAGGTAGGGGAGCTCGCGACACTCTTTCCCTTTTTTTTTT	22334.7
UDG_UG_f1GA_f2ACG	18137	55508	54889	0	CGCGAGCTCGAUACGCTCGCGGGAACGCGAGCGTGTCGAGCTCGCGACACTCTTTCCCTTTTTTTTTT	51926.5
UDG_UG_f1TC_f2ACG	11353	34751	34751	0	CGCGAGCTCTCUACGCTCGCGGGAACGCGAGCGTGGAGAGCTCGCGACACTCTTTCCCTTTTTTTTTT	33191.5
UDG_UG_f1AG_f2TGA	9525	29212	29212	0	CGCGAGCTCAGUTGACTCGCGGGAACGCGAGTCAGCTGAGCTCGCGACACTCTTTCCCTTTTTTTTTT	27832.4
UDG_UG_f1AT_f2CTG	26818	65535	81182	0	CGCGAGCTCATUCTGCTCGCGGGAACGCGAGCAGGATGAGCTCGCGACACTCTTTCCCTTTTTTTTTT	78076.8
UDG_UG_f1AA_f2CTG	20891	61436	63230	0	CGCGAGCTCAAUCTGCTCGCGGGAACGCGAGCAGGTTGAGCTCGCGACACTCTTTCCCTTTTTTTTTT	60811.5
UDG_UG_f1CC_f2GGA	8819	26216	26216	0	CGCGAGCTCCCUGGACTCGCGGGAACGCGAGTCCGGGGAGCTCGCGACACTCTTTCCCTTTTTTTTTT	25189.8
UDG_UG_f1TC_f2TGG	8527	26587	26587	0	CGCGAGCTCTCUTGGCTCGCGGGAACGCGAGCCAGGAGAGCTCGCGACACTCTTTCCCTTTTTTTTTT	25546.3
UDG_UG_f1AG_f2CAA	14133	42258	42258	0	CGCGAGCTCAGUCAACTCGCGGGAACGCGAGTTGGCTGAGCTCGCGACACTCTTTCCCTTTTTTTTTT	40128.5
UDG_UG_f1AT_f2CTG	29181	65535	88339	0	CGCGAGCTCATUCTGCTCGCGGGAACGCGAGCAGGATGAGCTCGCGACACTCTTTCCCTTTTTTTTTT	83236.2
UDG_UG_f1AT_f2CGA	13909	42288	42288	0	CGCGAGCTCATUCGACTCGCGGGAACGCGAGTCGGATGAGCTCGCGACACTCTTTCCCTTTTTTTTTT	39275.5
UDG_UG_f1TC_f2AAC	12038	37330	37330	0	CGCGAGCTCTCUAACCTCGCGGGAACGCGAGGTTGGAGAGCTCGCGACACTCTTTCCCTTTTTTTTTT	34503.4
UDG_UG_f1CA_f2ACG	15090	44156	44156	0	CGCGAGCTCCAUACGCTCGCGGGAACGCGAGCGTGTGGAGCTCGCGACACTCTTTCCCTTTTTTTTTT	40728.4
UDG_UG_f1GT_f2CAT	11132	33087	33087	0	CGCGAGCTCGTUCATCTCGCGGGAACGCGAGATGGACGAGCTCGCGACACTCTTTCCCTTTTTTTTTT	30680.1
UDG_UG_f1GC_f2GTC	13585	38883	38883	0	CGCGAGCTCGCUGTCCTCGCGGGAACGCGAGGACGGCGAGCTCGCGACACTCTTTCCCTTTTTTTTTT	36429.1
UDG_UG_f1AG_f2CCG	10584	31364	31364	0	CGCGAGCTCAGUCCGCTCGCGGGAACGCGAGCGGGCTGAGCTCGCGACACTCTTTCCCTTTTTTTTTT	29430.6
UDG_UG_f1CA_f2TTG	11277	35416	35416	0	CGCGAGCTCCAUTTGCTCGCGGGAACGCGAGCAAGTGGAGCTCGCGACACTCTTTCCCTTTTTTTTTT	33232.9
UDG_UG_f1GA_f2CCC	9963	30644	30644	0	CGCGAGCTCGAUCCCCTCGCGGGAACGCGAGGGGGTCGAGCTCGCGACACTCTTTCCCTTTTTTTTTT	29039.6
UDG_UG_f1GT_f2GCG	10390	31880	31880	0	CGCGAGCTCGTUGCGCTCGCGGGAACGCGAGCGCGACGAGCTCGCGACACTCTTTCCCTTTTTTTTTT	30210.9
UDG_UG_f1CG_f2TGC	8331	25145	25145	0	CGCGAGCTCCGUTGCCTCGCGGGAACGCGAGGCAGCGGAGCTCGCGACACTCTTTCCCTTTTTTTTTT	23649.3
UDG_UG_f1AC_f2CCA	6937	21820	21820	0	CGCGAGCTCACUCCACTCGCGGGAACGCGAGTGGGGTGAGCTCGCGACACTCTTTCCCTTTTTTTTTT	20677.6
UDG_UG_f1AC_f2CAC	9577	29598	29598	0	CGCGAGCTCACUCACCTCGCGGGAACGCGAGGTGGGTGAGCTCGCGACACTCTTTCCCTTTTTTTTTT	28092.8
UDG_UG_f1AC_f2ATA	13268	41918	41918	0	CGCGAGCTCACUATACTCGCGGGAACGCGAGTATGGTGAGCTCGCGACACTCTTTCCCTTTTTTTTTT	40424.5
UDG_UG_f1AG_f2TTG	10545	32512	32512	0	CGCGAGCTCAGUTTGCTCGCGGGAACGCGAGCAAGCTGAGCTCGCGACACTCTTTCCCTTTTTTTTTT	31724.2
UDG_UG_f1CA_f2CTA	10938	34339	34339	0	CGCGAGCTCCAUCTACTCGCGGGAACGCGAGTAGGTGGAGCTCGCGACACTCTTTCCCTTTTTTTTTT	33652.8
UDG_UG_f1CC_f2CCT	8357	26144	26144	0	CGCGAGCTCCCUCCTCTCGCGGGAACGCGAGAGGGGGGAGCTCGCGACACTCTTTCCCTTTTTTTTTT	25887.9
UDG_UG_f1GA_f2CCT	9262	28178	28178	0	CGCGAGCTCGAUCCTCTCGCGGGAACGCGAGAGGGTCGAGCTCGCGACACTCTTTCCCTTTTTTTTTT	28277.3
UDG_UG_f1AT_f2AAG	15225	47272	47272	0	CGCGAGCTCATUAAGCTCGCGGGAACGCGAGCTTGATGAGCTCGCGACACTCTTTCCCTTTTTTTTTT	47669.1
UDG_UG_f1GC_f2AAC	11263	33826	33826	0	CGCGAGCTCGCUAACCTCGCGGGAACGCGAGGTTGGCGAGCTCGCGACACTCTTTCCCTTTTTTTTTT	34173.2
UDG_UG_f1CT_f2CGT	8868	26532	26532	0	CGCGAGCTCCTUCGTCTCGCGGGAACGCGAGACGGAGGAGCTCGCGACACTCTTTCCCTTTTTTTTTT	27099.1
UDG_UG_f1AC_f2ATA	10874	33764	33764	0	CGCGAGCTCACUATACTCGCGGGAACGCGAGTATGGTGAGCTCGCGACACTCTTTCCCTTTTTTTTTT	35828.3
UDG_UG_f1GT_f2CCC	7578	22586	22586	0	CGCGAGCTCGTUCCCCTCGCGGGAACGCGAGGGGGACGAGCTCGCGACACTCTTTCCCTTTTTTTTTT	24411.8
UDG_UG_f1AT_f2AGG	10699	33181	33181	0	CGCGAGCTCATUAGGCTCGCGGGAACGCGAGCCTGATGAGCTCGCGACACTCTTTCCCTTTTTTTTTT	36012
UDG_UG_f1AT_f2ATG	30360	65535	91910	0	CGCGAGCTCATUATGCTCGCGGGAACGCGAGCATGATGAGCTCGCGACACTCTTTCCCTTTTTTTTTT	100943
UDG_UG_f1AA_f2ATC	28707	65535	86903	0	CGCGAGCTCAAUATCCTCGCGGGAACGCGAGGATGTTGAGCTCGCGACACTCTTTCCCTTTTTTTTTT	95545.7
UDG_UG_f1CC_f2TAG	5059	15260	15260	0	CGCGAGCTCCCUTAGCTCGCGGGAACGCGAGCTAGGGGAGCTCGCGACACTCTTTCCCTTTTTTTTTT	17110.8
UDG_UG_f1TC_f2GGC	4858	14508	14508	0	CGCGAGCTCTCUGGCCTCGCGGGAACGCGAGGCCGGAGAGCTCGCGACACTCTTTCCCTTTTTTTTTT	16436.8
UDG_UG_f1AT_f2CGT	8855	26323	26323	0	CGCGAGCTCATUCGTCTCGCGGGAACGCGAGACGGATGAGCTCGCGACACTCTTTCCCTTTTTTTTTT	29888.2
UDG_UG_f1AA_f2TCT	7538	22313	22313	0	CGCGAGCTCAAUTCTCTCGCGGGAACGCGAGAGAGTTGAGCTCGCGACACTCTTTCCCTTTTTTTTTT	25696.4
UDG_UG_f1AC_f2CTG	7037	21862	21862	0	CGCGAGCTCACUCTGCTCGCGGGAACGCGAGCAGGGTGAGCTCGCGACACTCTTTCCCTTTTTTTTTT	25429.2
UDG_UG_f1CC_f2GCT	6851	21032	21032	0	CGCGAGCTCCCUGCTCTCGCGGGAACGCGAGAGCGGGGAGCTCGCGACACTCTTTCCCTTTTTTTTTT	25085.9
UDG_UG_f1CA_f2TTT	8484	27146	27146	0	CGCGAGCTCCAUTTTCTCGCGGGAACGCGAGAAAGTGGAGCTCGCGACACTCTTTCCCTTTTTTTTTT	32660.4
UDG_UG_f1CT_f2GGA	6578	20468	20468	0	CGCGAGCTCCTUGGACTCGCGGGAACGCGAGTCCGAGGAGCTCGCGACACTCTTTCCCTTTTTTTTTT	25282.5
UDG_UG_f1TT_f2GCC	9159	27961	27961	0	CGCGAGCTCTTUGCCCTCGCGGGAACGCGAGGGCGAAGAGCTCGCGACACTCTTTCCCTTTTTTTTTT	34641.7
UDG_UG_f1TA_f2ACC	8723	26616	26616	0	CGCGAGCTCTAUACCCTCGCGGGAACGCGAGGGTGTAGAGCTCGCGACACTCTTTCCCTTTTTTTTTT	33234.7
UDG_UG_f1AG_f2CCT	6508	19401	19401	0	CGCGAGCTCAGUCCTCTCGCGGGAACGCGAGAGGGCTGAGCTCGCGACACTCTTTCCCTTTTTTTTTT	24632
UDG_UG_f1TG_f2ATT	16167	48172	48172	0	CGCGAGCTCTGUATTCTCGCGGGAACGCGAGAATGCAGAGCTCGCGACACTCTTTCCCTTTTTTTTTT	62462.5
UDG_UG_f1TT_f2GAC	7868	23772	23772	0	CGCGAGCTCTTUGACCTCGCGGGAACGCGAGGTCGAAGAGCTCGCGACACTCTTTCCCTTTTTTTTTT	32298.6
UDG_UG_f1TG_f2ACT	16078	45363	45363	0	CGCGAGCTCTGUACTCTCGCGGGAACGCGAGAGTGCAGAGCTCGCGACACTCTTTCCCTTTTTTTTTT	63484.4
UDG_UG_f1TG_f2TAA	9647	29253	29253	0	CGCGAGCTCTGUTAACTCGCGGGAACGCGAGTTAGCAGAGCTCGCGACACTCTTTCCCTTTTTTTTTT	42695.2
UDG_UG_f1AT_f2CTG	11864	35724	35724	0	CGCGAGCTCATUCTGCTCGCGGGAACGCGAGCAGGATGAGCTCGCGACACTCTTTCCCTTTTTTTTTT	53398.4
UDG_UG_f1CG_f2AGG	10223	29459	29459	0	CGCGAGCTCCGUAGGCTCGCGGGAACGCGAGCCTGCGGAGCTCGCGACACTCTTTCCCTTTTTTTTTT	46038.1
UDG_UG_random_2U	7500	21986	21986	0	CGCGUCTACUCTTTATGCGCGGGAACGCGCATAAAGGGTAGGCGCGACACTCTTTCCCTTTTTTTTTT	37064.5
UDG_UG_f1AA_f2CGT	6282	18443	18443	0	CGCGAGCTCAAUCGTCTCGCGGGAACGCGAGACGGTTGAGCTCGCGACACTCTTTCCCTTTTTTTTTT	32457
UDG_UG_f1TG_f2TTC	6625	19476	19476	0	CGCGAGCTCTGUTTCCTCGCGGGAACGCGAGGAAGCAGAGCTCGCGACACTCTTTCCCTTTTTTTTTT	35716.4
UDG_UG_f1AA_f2TTG	7127	21118	21118	0	CGCGAGCTCAAUTTGCTCGCGGGAACGCGAGCAAGTTGAGCTCGCGACACTCTTTCCCTTTTTTTTTT	41613.8
UDG_UG_f1GC_f2TTT	5618	16110	16110	0	CGCGAGCTCGCUTTTCTCGCGGGAACGCGAGAAAGGCGAGCTCGCGACACTCTTTCCCTTTTTTTTTT	31745.3
UDG_UG_f1GG_f2TGC	4789	13691	13691	0	CGCGAGCTCGGUTGCCTCGCGGGAACGCGAGGCAGCCGAGCTCGCGACACTCTTTCCCTTTTTTTTTT	26978.6
UDG_UG_f1CA_f2ACT	5770	16722	16722	0	CGCGAGCTCCAUACTCTCGCGGGAACGCGAGAGTGTGGAGCTCGCGACACTCTTTCCCTTTTTTTTTT	32951.3
UDG_UG_f1TA_f2TAT	3575	10442	10442	0	CGCGAGCTCTAUTATCTCGCGGGAACGCGAGATAGTAGAGCTCGCGACACTCTTTCCCTTTTTTTTTT	20576.3
UDG_UG_f1AA_f2ACC	4735	13632	13632	0	CGCGAGCTCAAUACCCTCGCGGGAACGCGAGGGTGTTGAGCTCGCGACACTCTTTCCCTTTTTTTTTT	26862.3
UDG_UG_f1TG_f2AGG	4116	11346	11346	0	CGCGAGCTCTGUAGGCTCGCGGGAACGCGAGCCTGCAGAGCTCGCGACACTCTTTCCCTTTTTTTTTT	22357.7
UDG_UG_f1CC_f2TTG	12038	37933	37933	0	CGCGAGCTCCCUTTGCTCGCGGGAACGCGAGCAAGGGGAGCTCGCGACACTCTTTCCCTTTTTTTTTT	37467.6
UDG_UG_f1AT_f2TTC	15943	50347	48244	0	CGCGAGCTCATUTTCCTCGCGGGAACGCGAGGAAGATGAGCTCGCGACACTCTTTCCCTTTTTTTTTT	47652
UDG_UG_f1GA_f2TCC	12462	39428	39428	0	CGCGAGCTCGAUTCCCTCGCGGGAACGCGAGGGAGTCGAGCTCGCGACACTCTTTCCCTTTTTTTTTT	38944.2
UDG_UG_f1TG_f2TAA	13793	42488	42488	0	CGCGAGCTCTGUTAACTCGCGGGAACGCGAGTTAGCAGAGCTCGCGACACTCTTTCCCTTTTTTTTTT	41966.7
UDG_UG_f1AT_f2CTT	19288	59186	58375	0	CGCGAGCTCATUCTTCTCGCGGGAACGCGAGAAGGATGAGCTCGCGACACTCTTTCCCTTTTTTTTTT	57658.7
UDG_UG_f1GC_f2ATC	15395	47734	47734	0	CGCGAGCTCGCUATCCTCGCGGGAACGCGAGGATGGCGAGCTCGCGACACTCTTTCCCTTTTTTTTTT	47148.3
UDG_UG_f1GG_f2GGT	13652	41449	41449	0	CGCGAGCTCGGUGGTCTCGCGGGAACGCGAGACCGCCGAGCTCGCGACACTCTTTCCCTTTTTTTTTT	40494.7
UDG_UG_f1TT_f2TAA	10690	32809	32809	0	CGCGAGCTCTTUTAACTCGCGGGAACGCGAGTTAGAAGAGCTCGCGACACTCTTTCCCTTTTTTTTTT	31850.9
UDG_UG_f1AT_f2CAT	15197	47406	47406	0	CGCGAGCTCATUCATCTCGCGGGAACGCGAGATGGATGAGCTCGCGACACTCTTTCCCTTTTTTTTTT	45017
UDG_UG_f1CC_f2TCT	8120	25244	25244	0	CGCGAGCTCCCUTCTCTCGCGGGAACGCGAGAGAGGGGAGCTCGCGACACTCTTTCCCTTTTTTTTTT	23881.5
UDG_UG_f1CT_f2AAT	23127	65535	70002	0	CGCGAGCTCCTUAATCTCGCGGGAACGCGAGATTGAGGAGCTCGCGACACTCTTTCCCTTTTTTTTTT	66860.6
UDG_UG_f1AA_f2ATT	48752	65535	147616	0	CGCGAGCTCAAUATTCTCGCGGGAACGCGAGAATGTTGAGCTCGCGACACTCTTTCCCTTTTTTTTTT	140644
UDG_UG_f1CA_f2AAA	29153	65535	88254	0	CGCGAGCTCCAUAAACTCGCGGGAACGCGAGTTTGTGGAGCTCGCGACACTCTTTCCCTTTTTTTTTT	84878.3
UDG_UG_f1AT_f2GTC	20304	61211	61452	0	CGCGAGCTCATUGTCCTCGCGGGAACGCGAGGACGATGAGCTCGCGACACTCTTTCCCTTTTTTTTTT	59101.5
UDG_UG_random_4U	7343	22801	22801	0	CGCGCUCUGUUCTGTCCCGCGGGAACGCGGGACAGGGCGGGGCGCGACACTCTTTCCCTTTTTTTTTT	21908.5
UDG_UG_f1GA_f2CGT	14987	44590	44590	0	CGCGAGCTCGAUCGTCTCGCGGGAACGCGAGACGGTCGAGCTCGCGACACTCTTTCCCTTTTTTTTTT	42844.5
UDG_UG_f1AG_f2CCG	11896	35855	35855	0	CGCGAGCTCAGUCCGCTCGCGGGAACGCGAGCGGGCTGAGCTCGCGACACTCTTTCCCTTTTTTTTTT	34048.1
UDG_UG_f1CC_f2AAG	15331	46952	46952	0	CGCGAGCTCCCUAAGCTCGCGGGAACGCGAGCTTGGGGAGCTCGCGACACTCTTTCCCTTTTTTTTTT	44239.9
UDG_UG_f1AC_f2AAA	17293	54967	52332	0	CGCGAGCTCACUAAACTCGCGGGAACGCGAGTTTGGTGAGCTCGCGACACTCTTTCCCTTTTTTTTTT	48604
UDG_UG_f1CC_f2GGT	9634	29876	29876	0	CGCGAGCTCCCUGGTCTCGCGGGAACGCGAGACCGGGGAGCTCGCGACACTCTTTCCCTTTTTTTTTT	27613.8
UDG_UG_f1GC_f2CTG	11390	33534	33534	0	CGCGAGCTCGCUCTGCTCGCGGGAACGCGAGCAGGGCGAGCTCGCGACACTCTTTCCCTTTTTTTTTT	30930.9
UDG_UG_f1TG_f2AGG	17463	53732	52847	0	CGCGAGCTCTGUAGGCTCGCGGGAACGCGAGCCTGCAGAGCTCGCGACACTCTTTCCCTTTTTTTTTT	49002.7
UDG_UG_f1TA_f2GTC	11257	35127	35127	0	CGCGAGCTCTAUGTCCTCGCGGGAACGCGAGGACGTAGAGCTCGCGACACTCTTTCCCTTTTTTTTTT	32910.1
UDG_UG_f1GC_f2GAG	10010	29873	29873	0	CGCGAGCTCGCUGAGCTCGCGGGAACGCGAGCTCGGCGAGCTCGCGACACTCTTTCCCTTTTTTTTTT	28031.5
UDG_UG_f1GG_f2TTA	13047	40342	40342	0	CGCGAGCTCGGUTTACTCGCGGGAACGCGAGTAAGCCGAGCTCGCGACACTCTTTCCCTTTTTTTTTT	37855.2
UDG_UG_f1CT_f2AGT	15382	47933	47933	0	CGCGAGCTCCTUAGTCTCGCGGGAACGCGAGACTGAGGAGCTCGCGACACTCTTTCCCTTTTTTTTTT	45423.4
UDG_UG_f1TT_f2GTG	16292	51853	49301	0	CGCGAGCTCTTUGTGCTCGCGGGAACGCGAGCACGAAGAGCTCGCGACACTCTTTCCCTTTTTTTTTT	46719.8
UDG_UG_f1TG_f2CGC	10528	31249	31249	0	CGCGAGCTCTGUCGCCTCGCGGGAACGCGAGGCGGCAGAGCTCGCGACACTCTTTCCCTTTTTTTTTT	29390.3
UDG_UG_f1AT_f2AGA	19414	56783	58757	0	CGCGAGCTCATUAGACTCGCGGGAACGCGAGTCTGATGAGCTCGCGACACTCTTTCCCTTTTTTTTTT	55680.7
UDG_UG_f1CA_f2GGG	8419	24524	24524	0	CGCGAGCTCCAUGGGCTCGCGGGAACGCGAGCCCGTGGAGCTCGCGACACTCTTTCCCTTTTTTTTTT	23276.8
UDG_UG_f1CC_f2GGG	10138	26959	26959	0	CGCGAGCTCCCUGGGCTCGCGGGAACGCGAGCCCGGGGAGCTCGCGACACTCTTTCCCTTTTTTTTTT	25998.5
UDG_UG_f1CA_f2CCT	9542	28771	28771	0	CGCGAGCTCCAUCCTCTCGCGGGAACGCGAGAGGGTGGAGCTCGCGACACTCTTTCCCTTTTTTTTTT	28073.9
UDG_UG_f1CG_f2CCG	8765	26904	26904	0	CGCGAGCTCCGUCCGCTCGCGGGAACGCGAGCGGGCGGAGCTCGCGACACTCTTTCCCTTTTTTTTTT	26366.4
UDG_UG_f1AT_f2CTT	15590	45413	45413	0	CGCGAGCTCATUCTTCTCGCGGGAACGCGAGAAGGATGAGCTCGCGACACTCTTTCCCTTTTTTTTTT	44968.2
UDG_UG_f1AA_f2TTG	14428	44493	44493	0	CGCGAGCTCAAUTTGCTCGCGGGAACGCGAGCAAGTTGAGCTCGCGACACTCTTTCCCTTTTTTTTTT	44649.8
UDG_UG_f1AA_f2GAG	12688	40033	40033	0	CGCGAGCTCAAUGAGCTCGCGGGAACGCGAGCTCGTTGAGCTCGCGACACTCTTTCCCTTTTTTTTTT	40369.3
UDG_UG_f1TT_f2CAA	11307	34046	34046	0	CGCGAGCTCTTUCAACTCGCGGGAACGCGAGTTGGAAGAGCTCGCGACACTCTTTCCCTTTTTTTTTT	34395.5
UDG_UG_f1TC_f2CTA	8933	26910	26910	0	CGCGAGCTCTCUCTACTCGCGGGAACGCGAGTAGGGAGAGCTCGCGACACTCTTTCCCTTTTTTTTTT	27485.2
UDG_UG_f1AC_f2CGG	8079	24182	24182	0	CGCGAGCTCACUCGGCTCGCGGGAACGCGAGCCGGGTGAGCTCGCGACACTCTTTCCCTTTTTTTTTT	25660.5
UDG_UG_f1TG_f2ACG	17670	51813	53474	0	CGCGAGCTCTGUACGCTCGCGGGAACGCGAGCGTGCAGAGCTCGCGACACTCTTTCCCTTTTTTTTTT	57796.6
UDG_UG_f1AT_f2TCA	7692	23917	23917	0	CGCGAGCTCATUTCACTCGCGGGAACGCGAGTGAGATGAGCTCGCGACACTCTTTCCCTTTTTTTTTT	25957.6
UDG_UG_f1TA_f2AGT	9428	29886	29886	0	CGCGAGCTCTAUAGTCTCGCGGGAACGCGAGACTGTAGAGCTCGCGACACTCTTTCCCTTTTTTTTTT	32823.3
UDG_UG_f1TT_f2GAT	7266	22786	22786	0	CGCGAGCTCTTUGATCTCGCGGGAACGCGAGATCGAAGAGCTCGCGACACTCTTTCCCTTTTTTTTTT	25052.1
UDG_UG_f1AT_f2ATT	20804	61614	62967	0	CGCGAGCTCATUATTCTCGCGGGAACGCGAGAATGATGAGCTCGCGACACTCTTTCCCTTTTTTTTTT	70604.1
UDG_UG_f1AG_f2GTC	9344	28482	28482	0	CGCGAGCTCAGUGTCCTCGCGGGAACGCGAGGACGCTGAGCTCGCGACACTCTTTCCCTTTTTTTTTT	32268.6
UDG_UG_f1TC_f2TCA	9076	27733	27733	0	CGCGAGCTCTCUTCACTCGCGGGAACGCGAGTGAGGAGAGCTCGCGACACTCTTTCCCTTTTTTTTTT	31489.2
UDG_UG_f1TG_f2TTT	12066	37806	37806	0	CGCGAGCTCTGUTTTCTCGCGGGAACGCGAGAAAGCAGAGCTCGCGACACTCTTTCCCTTTTTTTTTT	43538.6
UDG_UG_f1CG_f2AAC	20149	61005	60983	0	CGCGAGCTCCGUAACCTCGCGGGAACGCGAGGTTGCGGAGCTCGCGACACTCTTTCCCTTTTTTTTTT	70933.6
UDG_UG_f1GG_f2AAT	23034	65535	69721	0	CGCGAGCTCGGUAATCTCGCGGGAACGCGAGATTGCCGAGCTCGCGACACTCTTTCCCTTTTTTTTTT	83159.5
UDG_UG_f1TA_f2GGA	8004	23482	23482	0	CGCGAGCTCTAUGGACTCGCGGGAACGCGAGTCCGTAGAGCTCGCGACACTCTTTCCCTTTTTTTTTT	28252.1
UDG_UG_f1AA_f2TGC	8393	24508	24508	0	CGCGAGCTCAAUTGCCTCGCGGGAACGCGAGGCAGTTGAGCTCGCGACACTCTTTCCCTTTTTTTTTT	30272.8
UDG_UG_f1CA_f2AAG	10596	31442	31442	0	CGCGAGCTCCAUAAGCTCGCGGGAACGCGAGCTTGTGGAGCTCGCGACACTCTTTCCCTTTTTTTTTT	38954.4
UDG_UG_f1CA_f2AAT	12743	37956	37956	0	CGCGAGCTCCAUAATCTCGCGGGAACGCGAGATTGTGGAGCTCGCGACACTCTTTCCCTTTTTTTTTT	47394.6
UDG_UG_f1CG_f2CCT	9878	29261	29261	0	CGCGAGCTCCGUCCTCTCGCGGGAACGCGAGAGGGCGGAGCTCGCGACACTCTTTCCCTTTTTTTTTT	37150.5
UDG_UG_f1TC_f2ACT	8653	26097	26097	0	CGCGAGCTCTCUACTCTCGCGGGAACGCGAGAGTGGAGAGCTCGCGACACTCTTTCCCTTTTTTTTTT	33838.8
UDG_UG_f1TA_f2TCC	7278	21776	21776	0	CGCGAGCTCTAUTCCCTCGCGGGAACGCGAGGGAGTAGAGCTCGCGACACTCTTTCCCTTTTTTTTTT	29586.7
UDG_UG_f1GC_f2AGC	8414	24532	24532	0	CGCGAGCTCGCUAGCCTCGCGGGAACGCGAGGCTGGCGAGCTCGCGACACTCTTTCCCTTTTTTTTTT	34332
UDG_UG_f1CG_f2AAG	14501	41221	41221	0	CGCGAGCTCCGUAAGCTCGCGGGAACGCGAGCTTGCGGAGCTCGCGACACTCTTTCCCTTTTTTTTTT	60162.7
UDG_UG_f1AA_f2GCG	7543	22101	22101	0	CGCGAGCTCAAUGCGCTCGCGGGAACGCGAGCGCGTTGAGCTCGCGACACTCTTTCCCTTTTTTTTTT	33035.5
UDG_UG_f1TT_f2CGC	6784	20007	20007	0	CGCGAGCTCTTUCGCCTCGCGGGAACGCGAGGCGGAAGAGCTCGCGACACTCTTTCCCTTTTTTTTTT	31266.6
UDG_UG_f1GA_f2GGT	6041	17900	17900	0	CGCGAGCTCGAUGGTCTCGCGGGAACGCGAGACCGTCGAGCTCGCGACACTCTTTCCCTTTTTTTTTT	30176.2
UDG_UG_f1AC_f2GCG	5337	15358	15358	0	CGCGAGCTCACUGCGCTCGCGGGAACGCGAGCGCGGTGAGCTCGCGACACTCTTTCCCTTTTTTTTTT	27027.8
UDG_UG_f1TC_f2CCA	4472	13452	13452	0	CGCGAGCTCTCUCCACTCGCGGGAACGCGAGTGGGGAGAGCTCGCGACACTCTTTCCCTTTTTTTTTT	24669.2
UDG_UG_f1CC_f2CAG	4696	13870	13870	0	CGCGAGCTCCCUCAGCTCGCGGGAACGCGAGCTGGGGGAGCTCGCGACACTCTTTCCCTTTTTTTTTT	27331.3
UDG_UG_f1CA_f2CCT	4424	13365	13365	0	CGCGAGCTCCAUCCTCTCGCGGGAACGCGAGAGGGTGGAGCTCGCGACACTCTTTCCCTTTTTTTTTT	26336.2
UDG_UG_f1CT_f2GAC	4291	12405	12405	0	CGCGAGCTCCTUGACCTCGCGGGAACGCGAGGTCGAGGAGCTCGCGACACTCTTTCCCTTTTTTTTTT	24444.5
UDG_UG_f1CT_f2GCG	4442	12618	12618	0	CGCGAGCTCCTUGCGCTCGCGGGAACGCGAGCGCGAGGAGCTCGCGACACTCTTTCCCTTTTTTTTTT	24864.2
UDG_UG_f1TT_f2TTT	4099	11362	11362	0	CGCGAGCTCTTUTTTCTCGCGGGAACGCGAGAAAGAAGAGCTCGCGACACTCTTTCCCTTTTTTTTTT	22389.2
UDG_UG_f1TC_f2GTC	2904	8042	8042	0	CGCGAGCTCTCUGTCCTCGCGGGAACGCGAGGACGGAGAGCTCGCGACACTCTTTCCCTTTTTTTTTT	15847
UDG_UG_f1CG_f2CAG	2971	8218	8218	0	CGCGAGCTCCGUCAGCTCGCGGGAACGCGAGCTGGCGGAGCTCGCGACACTCTTTCCCTTTTTTTTTT	16193.9
UDG_UG_f1AC_f2TGA	11038	34985	34985	0	CGCGAGCTCACUTGACTCGCGGGAACGCGAGTCAGGTGAGCTCGCGACACTCTTTCCCTTTTTTTTTT	34555.7
UDG_UG_f1AC_f2AGC	11169	36086	36086	0	CGCGAGCTCACUAGCCTCGCGGGAACGCGAGGCTGGTGAGCTCGCGACACTCTTTCCCTTTTTTTTTT	35643.2
UDG_UG_f1AT_f2ATT	37463	65535	113423	0	CGCGAGCTCATUATTCTCGCGGGAACGCGAGAATGATGAGCTCGCGACACTCTTTCCCTTTTTTTTTT	112031
UDG_UG_f1GC_f2TTC	10531	34048	34048	0	CGCGAGCTCGCUTTCCTCGCGGGAACGCGAGGAAGGCGAGCTCGCGACACTCTTTCCCTTTTTTTTTT	33630.2
UDG_UG_f1TT_f2GAG	11010	35100	35100	0	CGCGAGCTCTTUGAGCTCGCGGGAACGCGAGCTCGAAGAGCTCGCGACACTCTTTCCCTTTTTTTTTT	34669.3
UDG_UG_f1CT_f2CGC	12954	39645	39645	0	CGCGAGCTCCTUCGCCTCGCGGGAACGCGAGGCGGAGGAGCTCGCGACACTCTTTCCCTTTTTTTTTT	39158.6
UDG_UG_f1AG_f2GTG	17317	53360	52405	0	CGCGAGCTCAGUGTGCTCGCGGGAACGCGAGCACGCTGAGCTCGCGACACTCTTTCCCTTTTTTTTTT	51198.4
UDG_UG_f1TA_f2TGA	10709	32713	32713	0	CGCGAGCTCTAUTGACTCGCGGGAACGCGAGTCAGTAGAGCTCGCGACACTCTTTCCCTTTTTTTTTT	31757.7
UDG_UG_f1AC_f2TAT	11450	35249	35249	0	CGCGAGCTCACUTATCTCGCGGGAACGCGAGATAGGTGAGCTCGCGACACTCTTTCCCTTTTTTTTTT	33472.7
UDG_UG_f1AT_f2ACG	18837	59094	57009	0	CGCGAGCTCATUACGCTCGCGGGAACGCGAGCGTGATGAGCTCGCGACACTCTTTCCCTTTTTTTTTT	53932.1
UDG_MM_GA	7912	24309	24309	0	CGCGAGCTCACGCTTACCGCGGGAACGCGGTAAGAGTGAGCTCGCGACACTCTTTCCCTTTTTTTTTT	23218.1
UDG_UG_f1AT_f2TCA	12084	37896	37896	0	CGCGAGCTCATUTCACTCGCGGGAACGCGAGTGAGATGAGCTCGCGACACTCTTTCCCTTTTTTTTTT	36106.3
UDG_UG_f1TA_f2TCC	10056	31339	31339	0	CGCGAGCTCTAUTCCCTCGCGGGAACGCGAGGGAGTAGAGCTCGCGACACTCTTTCCCTTTTTTTTTT	30140.3
UDG_UG_f1GA_f2GCA	14119	42178	42178	0	CGCGAGCTCGAUGCACTCGCGGGAACGCGAGTGCGTCGAGCTCGCGACACTCTTTCCCTTTTTTTTTT	40564.7
UDG_UG_f1AC_f2ACT	12089	38250	38250	0	CGCGAGCTCACUACTCTCGCGGGAACGCGAGAGTGGTGAGCTCGCGACACTCTTTCCCTTTTTTTTTT	36752.7
UDG_UG_f1TG_f2CCC	11940	34881	34881	0	CGCGAGCTCTGUCCCCTCGCGGGAACGCGAGGGGGCAGAGCTCGCGACACTCTTTCCCTTTTTTTTTT	33515.6
UDG_UG_f1AT_f2TAC	12392	38073	38073	0	CGCGAGCTCATUTACCTCGCGGGAACGCGAGGTAGATGAGCTCGCGACACTCTTTCCCTTTTTTTTTT	36154.4
UDG_UG_f1GT_f2TGA	10987	34942	34942	0	CGCGAGCTCGTUTGACTCGCGGGAACGCGAGTCAGACGAGCTCGCGACACTCTTTCCCTTTTTTTTTT	32923.6
UDG_UG_f1CC_f2AAG	12930	41004	41004	0	CGCGAGCTCCCUAAGCTCGCGGGAACGCGAGCTTGGGGAGCTCGCGACACTCTTTCCCTTTTTTTTTT	38083
UDG_UG_f1TC_f2CTC	9663	29927	29927	0	CGCGAGCTCTCUCTCCTCGCGGGAACGCGAGGAGGGAGAGCTCGCGACACTCTTTCCCTTTTTTTTTT	27660.9
UDG_UG_f1CG_f2CGT	12822	38981	38981	0	CGCGAGCTCCGUCGTCTCGCGGGAACGCGAGACGGCGGAGCTCGCGACACTCTTTCCCTTTTTTTTTT	35955.1
UDG_UG_f1GT_f2GGT	11428	34353	34353	0	CGCGAGCTCGTUGGTCTCGCGGGAACGCGAGACCGACGAGCTCGCGACACTCTTTCCCTTTTTTTTTT	31854
UDG_UG_f1CA_f2GAC	13302	41106	41106	0	CGCGAGCTCCAUGACCTCGCGGGAACGCGAGGTCGTGGAGCTCGCGACACTCTTTCCCTTTTTTTTTT	38511.8
UDG_UG_f1GA_f2ATT	27814	65535	84198	0	CGCGAGCTCGAUATTCTCGCGGGAACGCGAGAATGTCGAGCTCGCGACACTCTTTCCCTTTTTTTTTT	79007.8
UDG_UG_f1GA_f2CAC	10531	34301	34301	0	CGCGAGCTCGAUCACCTCGCGGGAACGCGAGGTGGTCGAGCTCGCGACACTCTTTCCCTTTTTTTTTT	32186.6
UDG_UG_f1GA_f2AGT	18455	57044	55852	0	CGCGAGCTCGAUAGTCTCGCGGGAACGCGAGACTGTCGAGCTCGCGACACTCTTTCCCTTTTTTTTTT	52927.8
UDG_UG_f1TC_f2GTA	9694	29775	29775	0	CGCGAGCTCTCUGTACTCGCGGGAACGCGAGTACGGAGAGCTCGCGACACTCTTTCCCTTTTTTTTTT	28216.1
UDG_UG_f1TC_f2ACA	11047	35995	35995	0	CGCGAGCTCTCUACACTCGCGGGAACGCGAGTGTGGAGAGCTCGCGACACTCTTTCCCTTTTTTTTTT	33854
UDG_UG_f1TC_f2AGG	10751	33185	33185	0	CGCGAGCTCTCUAGGCTCGCGGGAACGCGAGCCTGGAGAGCTCGCGACACTCTTTCCCTTTTTTTTTT	31447.6
UDG_UG_f1TC_f2TCG	10940	32593	32593	0	CGCGAGCTCTCUTCGCTCGCGGGAACGCGAGCGAGGAGAGCTCGCGACACTCTTTCCCTTTTTTTTTT	30935.5
UDG_UG_f1AT_f2TCA	11314	34405	34405	0	CGCGAGCTCATUTCACTCGCGGGAACGCGAGTGAGATGAGCTCGCGACACTCTTTCCCTTTTTTTTTT	33179.2
UDG_UG_f1TT_f2AGC	13896	41837	41837	0	CGCGAGCTCTTUAGCCTCGCGGGAACGCGAGGCTGAAGAGCTCGCGACACTCTTTCCCTTTTTTTTTT	40823.3
UDG_UG_f1GC_f2ATA	13953	43000	43000	0	CGCGAGCTCGCUATACTCGCGGGAACGCGAGTATGGCGAGCTCGCGACACTCTTTCCCTTTTTTTTTT	42140.7
UDG_UG_f1TG_f2TAT	11424	35528	35528	0	CGCGAGCTCTGUTATCTCGCGGGAACGCGAGATAGCAGAGCTCGCGACACTCTTTCCCTTTTTTTTTT	35180
UDG_UG_f1GA_f2AGG	13825	42482	42482	0	CGCGAGCTCGAUAGGCTCGCGGGAACGCGAGCCTGTCGAGCTCGCGACACTCTTTCCCTTTTTTTTTT	42631.8
UDG_UG_f1TT_f2CCG	11499	33200	33200	0	CGCGAGCTCTTUCCGCTCGCGGGAACGCGAGCGGGAAGAGCTCGCGACACTCTTTCCCTTTTTTTTTT	33478.9
UDG_UG_f1TG_f2GGC	11434	33132	33132	0	CGCGAGCTCTGUGGCCTCGCGGGAACGCGAGGCCGCAGAGCTCGCGACACTCTTTCCCTTTTTTTTTT	33472.1
UDG_UG_f1AA_f2CGC	10729	32483	32483	0	CGCGAGCTCAAUCGCCTCGCGGGAACGCGAGGCGGTTGAGCTCGCGACACTCTTTCCCTTTTTTTTTT	33177.3
UDG_UG_f1AA_f2CAG	10231	31902	31902	0	CGCGAGCTCAAUCAGCTCGCGGGAACGCGAGCTGGTTGAGCTCGCGACACTCTTTCCCTTTTTTTTTT	33852.5
UDG_UG_f1CA_f2TAT	9490	30030	30030	0	CGCGAGCTCCAUTATCTCGCGGGAACGCGAGATAGTGGAGCTCGCGACACTCTTTCCCTTTTTTTTTT	32457.5
UDG_UG_f1TT_f2CGC	10801	32814	32814	0	CGCGAGCTCTTUCGCCTCGCGGGAACGCGAGGCGGAAGAGCTCGCGACACTCTTTCCCTTTTTTTTTT	35613.7
UDG_UG_f1CT_f2TAT	12144	37751	37751	0	CGCGAGCTCCTUTATCTCGCGGGAACGCGAGATAGAGGAGCTCGCGACACTCTTTCCCTTTTTTTTTT	41461.3
UDG_UG_f1AA_f2GAC	12514	37357	37357	0	CGCGAGCTCAAUGACCTCGCGGGAACGCGAGGTCGTTGAGCTCGCGACACTCTTTCCCTTTTTTTTTT	41072.2
UDG_UG_f1TG_f2ATA	17864	54307	54062	0	CGCGAGCTCTGUATACTCGCGGGAACGCGAGTATGCAGAGCTCGCGACACTCTTTCCCTTTTTTTTTT	60619
UDG_UG_f1AT_f2GAC	9461	29712	29712	0	CGCGAGCTCATUGACCTCGCGGGAACGCGAGGTCGATGAGCTCGCGACACTCTTTCCCTTTTTTTTTT	33662.2
UDG_UG_f1AC_f2ACA	8924	26230	26230	0	CGCGAGCTCACUACACTCGCGGGAACGCGAGTGTGGTGAGCTCGCGACACTCTTTCCCTTTTTTTTTT	29782.6
UDG_UG_f1CA_f2GGA	9871	30466	30466	0	CGCGAGCTCCAUGGACTCGCGGGAACGCGAGTCCGTGGAGCTCGCGACACTCTTTCCCTTTTTTTTTT	35085.6
UDG_UG_f1CA_f2TGG	8723	27554	27554	0	CGCGAGCTCCAUTGGCTCGCGGGAACGCGAGCCAGTGGAGCTCGCGACACTCTTTCCCTTTTTTTTTT	32050
UDG_UG_f1AG_f2GAA	11499	33863	33863	0	CGCGAGCTCAGUGAACTCGCGGGAACGCGAGTTCGCTGAGCTCGCGACACTCTTTCCCTTTTTTTTTT	40390
UDG_UG_f1GA_f2ATG	22344	63602	67631	0	CGCGAGCTCGAUATGCTCGCGGGAACGCGAGCATGTCGAGCTCGCGACACTCTTTCCCTTTTTTTTTT	81369.4
UDG_UG_f1AG_f2CTC	11349	33751	33751	0	CGCGAGCTCAGUCTCCTCGCGGGAACGCGAGGAGGCTGAGCTCGCGACACTCTTTCCCTTTTTTTTTT	41689.9
UDG_MM_GA	7203	21236	21236	0	CGCGAGCTCACGCTTACCGCGGGAACGCGGTAAGAGTGAGCTCGCGACACTCTTTCCCTTTTTTTTTT	26309.9
UDG_UG_f1TA_f2AGT	8851	25756	25756	0	CGCGAGCTCTAUAGTCTCGCGGGAACGCGAGACTGTAGAGCTCGCGACACTCTTTCCCTTTTTTTTTT	32160.8
UDG_UG_f1TC_f2TTT	8018	23769	23769	0	CGCGAGCTCTCUTTTCTCGCGGGAACGCGAGAAAGGAGAGCTCGCGACACTCTTTCCCTTTTTTTTTT	30177.7
UDG_UG_f1AC_f2TGT	6529	19440	19440	0	CGCGAGCTCACUTGTCTCGCGGGAACGCGAGACAGGTGAGCTCGCGACACTCTTTCCCTTTTTTTTTT	25207
UDG_UG_f1AT_f2GCA	8403	25404	25404	0	CGCGAGCTCATUGCACTCGCGGGAACGCGAGTGCGATGAGCTCGCGACACTCTTTCCCTTTTTTTTTT	34516
UDG_UG_f1GG_f2GGG	7381	20824	20824	0	CGCGAGCTCGGUGGGCTCGCGGGAACGCGAGCCCGCCGAGCTCGCGACACTCTTTCCCTTTTTTTTTT	29142.7
UDG_UG_f1GG_f2GGC	8796	25724	25724	0	CGCGAGCTCGGUGGCCTCGCGGGAACGCGAGGCCGCCGAGCTCGCGACACTCTTTCCCTTTTTTTTTT	37544.6
UDG_UG_f1CT_f2ACG	7959	23947	23947	0	CGCGAGCTCCTUACGCTCGCGGGAACGCGAGCGTGAGGAGCTCGCGACACTCTTTCCCTTTTTTTTTT	35794.8
UDG_UG_f1AA_f2CCC	5706	17584	17584	0	CGCGAGCTCAAUCCCCTCGCGGGAACGCGAGGGGGTTGAGCTCGCGACACTCTTTCCCTTTTTTTTTT	27480
UDG_UG_f1AC_f2GCG	6314	18995	18995	0	CGCGAGCTCACUGCGCTCGCGGGAACGCGAGCGCGGTGAGCTCGCGACACTCTTTCCCTTTTTTTTTT	32022.2
UDG_UG_f1TT_f2CCC	6468	19390	19390	0	CGCGAGCTCTTUCCCCTCGCGGGAACGCGAGGGGGAAGAGCTCGCGACACTCTTTCCCTTTTTTTTTT	34123.6
UDG_UG_f1TA_f2GTA	6659	19340	19340	0	CGCGAGCTCTAUGTACTCGCGGGAACGCGAGTACGTAGAGCTCGCGACACTCTTTCCCTTTTTTTTTT	35467
UDG_UG_f1GC_f2CCT	5749	17447	17447	0	CGCGAGCTCGCUCCTCTCGCGGGAACGCGAGAGGGGCGAGCTCGCGACACTCTTTCCCTTTTTTTTTT	34379.9
UDG_UG_f1AC_f2CTT	5905	18086	18086	0	CGCGAGCTCACUCTTCTCGCGGGAACGCGAGAAGGGTGAGCTCGCGACACTCTTTCCCTTTTTTTTTT	35639.1
UDG_UG_f1TA_f2TAA	5403	15830	15830	0	CGCGAGCTCTAUTAACTCGCGGGAACGCGAGTTAGTAGAGCTCGCGACACTCTTTCCCTTTTTTTTTT	31193.6
UDG_UG_f1TA_f2CAG	3946	11323	11323	0	CGCGAGCTCTAUCAGCTCGCGGGAACGCGAGCTGGTAGAGCTCGCGACACTCTTTCCCTTTTTTTTTT	22312.4
UDG_UG_f1AT_f2CAG	4646	13654	13654	0	CGCGAGCTCATUCAGCTCGCGGGAACGCGAGCTGGATGAGCTCGCGACACTCTTTCCCTTTTTTTTTT	26905.7
UDG_UG_f1GG_f2ATC	9127	26084	26084	0	CGCGAGCTCGGUATCCTCGCGGGAACGCGAGGATGCCGAGCTCGCGACACTCTTTCCCTTTTTTTTTT	51399.4
UDG_UG_f1CC_f2GCG	2859	7856	7856	0	CGCGAGCTCCCUGCGCTCGCGGGAACGCGAGCGCGGGGAGCTCGCGACACTCTTTCCCTTTTTTTTTT	15480.5
UDG_UG_f1TA_f2CGG	11940	37297	37297	0	CGCGAGCTCTAUCGGCTCGCGGGAACGCGAGCCGGTAGAGCTCGCGACACTCTTTCCCTTTTTTTTTT	36839.4
UDG_UG_f1GT_f2ACC	15602	48319	48319	0	CGCGAGCTCGTUACCCTCGCGGGAACGCGAGGGTGACGAGCTCGCGACACTCTTTCCCTTTTTTTTTT	47726.1
UDG_UG_f1TG_f2CAG	12952	41110	41110	0	CGCGAGCTCTGUCAGCTCGCGGGAACGCGAGCTGGCAGAGCTCGCGACACTCTTTCCCTTTTTTTTTT	40605.6
UDG_UG_f1GG_f2GAC	16320	49090	49090	0	CGCGAGCTCGGUGACCTCGCGGGAACGCGAGGTCGCCGAGCTCGCGACACTCTTTCCCTTTTTTTTTT	48487.7
UDG_UG_f1AA_f2CAG	14800	46705	46705	0	CGCGAGCTCAAUCAGCTCGCGGGAACGCGAGCTGGTTGAGCTCGCGACACTCTTTCCCTTTTTTTTTT	46131.9
UDG_UG_f1CC_f2CGG	9657	29519	29519	0	CGCGAGCTCCCUCGGCTCGCGGGAACGCGAGCCGGGGGAGCTCGCGACACTCTTTCCCTTTTTTTTTT	29156.8
UDG_UG_f1GT_f2TGT	11915	37478	37478	0	CGCGAGCTCGTUTGTCTCGCGGGAACGCGAGACAGACGAGCTCGCGACACTCTTTCCCTTTTTTTTTT	36615.1
UDG_UG_f1CA_f2GAA	14325	42618	42618	0	CGCGAGCTCCAUGAACTCGCGGGAACGCGAGTTCGTGGAGCTCGCGACACTCTTTCCCTTTTTTTTTT	41373.5
UDG_UG_f1TT_f2ATT	38022	65535	115117	0	CGCGAGCTCTTUATTCTCGCGGGAACGCGAGAATGAAGAGCTCGCGACACTCTTTCCCTTTTTTTTTT	109316
UDG_UG_f1CG_f2GCT	15743	47841	47841	0	CGCGAGCTCCGUGCTCTCGCGGGAACGCGAGAGCGCGGAGCTCGCGACACTCTTTCCCTTTTTTTTTT	45258.9
UDG_UG_f1TA_f2GTG	15469	46923	46923	0	CGCGAGCTCTAUGTGCTCGCGGGAACGCGAGCACGTAGAGCTCGCGACACTCTTTCCCTTTTTTTTTT	44817.3
UDG_UG_f1GT_f2TGG	10455	32107	32107	0	CGCGAGCTCGTUTGGCTCGCGGGAACGCGAGCCAGACGAGCTCGCGACACTCTTTCCCTTTTTTTTTT	30590.7
UDG_UG_f1AG_f2TGG	10090	32131	32131	0	CGCGAGCTCAGUTGGCTCGCGGGAACGCGAGCCAGCTGAGCTCGCGACACTCTTTCCCTTTTTTTTTT	30902
UDG_UG_f1CG_f2TAT	14915	45675	45675	0	CGCGAGCTCCGUTATCTCGCGGGAACGCGAGATAGCGGAGCTCGCGACACTCTTTCCCTTTTTTTTTT	43928
UDG_UG_f1TT_f2CCA	12898	40000	40000	0	CGCGAGCTCTTUCCACTCGCGGGAACGCGAGTGGGAAGAGCTCGCGACACTCTTTCCCTTTTTTTTTT	38434.2
UDG_UG_f1TG_f2GGC	15704	47156	47156	0	CGCGAGCTCTGUGGCCTCGCGGGAACGCGAGGCCGCAGAGCTCGCGACACTCTTTCCCTTTTTTTTTT	45310.1
UDG_UG_f1CT_f2GAG	11454	35485	35485	0	CGCGAGCTCCTUGAGCTCGCGGGAACGCGAGCTCGAGGAGCTCGCGACACTCTTTCCCTTTTTTTTTT	33696.8
UDG_UG_f1CA_f2ATG	34340	65535	103964	0	CGCGAGCTCCAUATGCTCGCGGGAACGCGAGCATGTGGAGCTCGCGACACTCTTTCCCTTTTTTTTTT	97958.7
UDG_UG_f1TT_f2CTT	16146	50046	48858	0	CGCGAGCTCTTUCTTCTCGCGGGAACGCGAGAAGGAAGAGCTCGCGACACTCTTTCCCTTTTTTTTTT	45377.5
UDG_UG_f1TG_f2CAT	13604	41745	41745	0	CGCGAGCTCTGUCATCTCGCGGGAACGCGAGATGGCAGAGCTCGCGACACTCTTTCCCTTTTTTTTTT	38584.1
UDG_UG_f1GG_f2GCT	14035	41751	41751	0	CGCGAGCTCGGUGCTCTCGCGGGAACGCGAGAGCGCCGAGCTCGCGACACTCTTTCCCTTTTTTTTTT	38510.1
UDG_UG_f1GC_f2TCA	8813	26699	26699	0	CGCGAGCTCGCUTCACTCGCGGGAACGCGAGTGAGGCGAGCTCGCGACACTCTTTCCCTTTTTTTTTT	24756.8
UDG_UG_f1GG_f2AAA	33089	65535	100175	0	CGCGAGCTCGGUAAACTCGCGGGAACGCGAGTTTGCCGAGCTCGCGACACTCTTTCCCTTTTTTTTTT	93853
UDG_UG_f1TT_f2GTA	18811	56447	56930	0	CGCGAGCTCTTUGTACTCGCGGGAACGCGAGTACGAAGAGCTCGCGACACTCTTTCCCTTTTTTTTTT	53420.7
UDG_UG_f1TC_f2ACC	10441	31083	31083	0	CGCGAGCTCTCUACCCTCGCGGGAACGCGAGGGTGGAGAGCTCGCGACACTCTTTCCCTTTTTTTTTT	29167
UDG_UG_f1TA_f2CTG	12537	40194	40194	0	CGCGAGCTCTAUCTGCTCGCGGGAACGCGAGCAGGTAGAGCTCGCGACACTCTTTCCCTTTTTTTTTT	38089.6
UDG_UG_f1TA_f2CTA	10482	34194	34194	0	CGCGAGCTCTAUCTACTCGCGGGAACGCGAGTAGGTAGAGCTCGCGACACTCTTTCCCTTTTTTTTTT	32403.7
UDG_UG_f1CA_f2GGA	11257	34450	34450	0	CGCGAGCTCCAUGGACTCGCGGGAACGCGAGTCCGTGGAGCTCGCGACACTCTTTCCCTTTTTTTTTT	32400.9
UDG_UG_f1CA_f2TCC	8476	24344	24344	0	CGCGAGCTCCAUTCCCTCGCGGGAACGCGAGGGAGTGGAGCTCGCGACACTCTTTCCCTTTTTTTTTT	23069.5
UDG_UG_f1GA_f2CTC	16254	48327	48327	0	CGCGAGCTCGAUCTCCTCGCGGGAACGCGAGGAGGTCGAGCTCGCGACACTCTTTCCCTTTTTTTTTT	45869.3
UDG_UG_f1GT_f2GGG	12353	36546	36546	0	CGCGAGCTCGTUGGGCTCGCGGGAACGCGAGCCCGACGAGCTCGCGACACTCTTTCCCTTTTTTTTTT	35243.9
UDG_MM_GA	7817	24454	24454	0	CGCGAGCTCACGCTTACCGCGGGAACGCGGTAAGAGTGAGCTCGCGACACTCTTTCCCTTTTTTTTTT	23861.5
UDG_UG_f1TC_f2CTG	9452	28390	28390	0	CGCGAGCTCTCUCTGCTCGCGGGAACGCGAGCAGGGAGAGCTCGCGACACTCTTTCCCTTTTTTTTTT	27822.7
UDG_UG_f1CT_f2GTT	13021	37976	37976	0	CGCGAGCTCCTUGTTCTCGCGGGAACGCGAGAACGAGGAGCTCGCGACACTCTTTCCCTTTTTTTTTT	37604
UDG_UG_f1CA_f2CTC	10489	32240	32240	0	CGCGAGCTCCAUCTCCTCGCGGGAACGCGAGGAGGTGGAGCTCGCGACACTCTTTCCCTTTTTTTTTT	32353.6
UDG_UG_f1TG_f2GAG	12672	37161	37161	0	CGCGAGCTCTGUGAGCTCGCGGGAACGCGAGCTCGCAGAGCTCGCGACACTCTTTCCCTTTTTTTTTT	37473.2
UDG_UG_f1CA_f2TAC	9034	26255	26255	0	CGCGAGCTCCAUTACCTCGCGGGAACGCGAGGTAGTGGAGCTCGCGACACTCTTTCCCTTTTTTTTTT	26524.5
UDG_UG_f1GC_f2GGA	8789	25664	25664	0	CGCGAGCTCGCUGGACTCGCGGGAACGCGAGTCCGGCGAGCTCGCGACACTCTTTCCCTTTTTTTTTT	26212.6
UDG_UG_f1GG_f2GAG	13687	40092	40092	0	CGCGAGCTCGGUGAGCTCGCGGGAACGCGAGCTCGCCGAGCTCGCGACACTCTTTCCCTTTTTTTTTT	42543.2
UDG_UG_f1AA_f2TGG	9371	29121	29121	0	CGCGAGCTCAAUTGGCTCGCGGGAACGCGAGCCAGTTGAGCTCGCGACACTCTTTCCCTTTTTTTTTT	31475
UDG_UG_f1AA_f2GAA	14963	45941	45941	0	CGCGAGCTCAAUGAACTCGCGGGAACGCGAGTTCGTTGAGCTCGCGACACTCTTTCCCTTTTTTTTTT	49860.7
UDG_UG_f1CT_f2TAA	11714	34439	34439	0	CGCGAGCTCCTUTAACTCGCGGGAACGCGAGTTAGAGGAGCTCGCGACACTCTTTCCCTTTTTTTTTT	37823.7
UDG_UG_f1GT_f2GCA	11032	33315	33315	0	CGCGAGCTCGTUGCACTCGCGGGAACGCGAGTGCGACGAGCTCGCGACACTCTTTCCCTTTTTTTTTT	36628.3
UDG_MM_CT	9815	31192	31192	0	CGCGAGCTCACCCTTACCGCGGGAACGCGGTAAGTGTGAGCTCGCGACACTCTTTCCCTTTTTTTTTT	34975.2
UDG_UG_f1CT_f2AAA	16500	50346	49931	0	CGCGAGCTCCTUAAACTCGCGGGAACGCGAGTTTGAGGAGCTCGCGACACTCTTTCCCTTTTTTTTTT	56569.2
UDG_UG_f1AA_f2TGT	9617	28614	28614	0	CGCGAGCTCAAUTGTCTCGCGGGAACGCGAGACAGTTGAGCTCGCGACACTCTTTCCCTTTTTTTTTT	32489.5
UDG_UG_f1CG_f2GCG	11035	32764	32764	0	CGCGAGCTCCGUGCGCTCGCGGGAACGCGAGCGCGCGGAGCTCGCGACACTCTTTCCCTTTTTTTTTT	37732.1
UDG_UG_f1AT_f2TCG	9081	28478	28478	0	CGCGAGCTCATUTCGCTCGCGGGAACGCGAGCGAGATGAGCTCGCGACACTCTTTCCCTTTTTTTTTT	33124.8
UDG_UG_f1TA_f2AAT	12951	37673	37673	0	CGCGAGCTCTAUAATCTCGCGGGAACGCGAGATTGTAGAGCTCGCGACACTCTTTCCCTTTTTTTTTT	44934.4
UDG_UG_f1GT_f2ACC	9023	26727	26727	0	CGCGAGCTCGTUACCCTCGCGGGAACGCGAGGGTGACGAGCTCGCGACACTCTTTCCCTTTTTTTTTT	32156.3
UDG_UG_f1TG_f2TTG	10990	32309	32309	0	CGCGAGCTCTGUTTGCTCGCGGGAACGCGAGCAAGCAGAGCTCGCGACACTCTTTCCCTTTTTTTTTT	39908.7
UDG_UG_f1AG_f2AAT	17913	51387	54210	0	CGCGAGCTCAGUAATCTCGCGGGAACGCGAGATTGCTGAGCTCGCGACACTCTTTCCCTTTTTTTTTT	67162.3
UDG_UG_f1CC_f2GTG	9519	28103	28103	0	CGCGAGCTCCCUGTGCTCGCGGGAACGCGAGCACGGGGAGCTCGCGACACTCTTTCCCTTTTTTTTTT	35091.4
UDG_UG_f1AA_f2TAG	8565	25541	25541	0	CGCGAGCTCAAUTAGCTCGCGGGAACGCGAGCTAGTTGAGCTCGCGACACTCTTTCCCTTTTTTTTTT	32427.5
UDG_UG_f1TA_f2TAG	6175	18273	18273	0	CGCGAGCTCTAUTAGCTCGCGGGAACGCGAGCTAGTAGAGCTCGCGACACTCTTTCCCTTTTTTTTTT	23693.8
UDG_UG_f1CT_f2CAT	7867	23560	23560	0	CGCGAGCTCCTUCATCTCGCGGGAACGCGAGATGGAGGAGCTCGCGACACTCTTTCCCTTTTTTTTTT	32010.6
UDG_UG_f1TA_f2CTA	8788	25899	25899	0	CGCGAGCTCTAUCTACTCGCGGGAACGCGAGTAGGTAGAGCTCGCGACACTCTTTCCCTTTTTTTTTT	36245
UDG_UG_f1TA_f2GGC	8687	25228	25228	0	CGCGAGCTCTAUGGCCTCGCGGGAACGCGAGGCCGTAGAGCTCGCGACACTCTTTCCCTTTTTTTTTT	36820.6
UDG_UG_f1CA_f2GGC	8994	26818	26818	0	CGCGAGCTCCAUGGCCTCGCGGGAACGCGAGGCCGTGGAGCTCGCGACACTCTTTCCCTTTTTTTTTT	40086.2
UDG_UG_f1TC_f2GCT	7072	20097	20097	0	CGCGAGCTCTCUGCTCTCGCGGGAACGCGAGAGCGGAGAGCTCGCGACACTCTTTCCCTTTTTTTTTT	31407.3
UDG_UG_f1CG_f2TAC	8147	23735	23735	0	CGCGAGCTCCGUTACCTCGCGGGAACGCGAGGTAGCGGAGCTCGCGACACTCTTTCCCTTTTTTTTTT	40013
UDG_UG_f1CA_f2TAA	7984	23698	23698	0	CGCGAGCTCCAUTAACTCGCGGGAACGCGAGTTAGTGGAGCTCGCGACACTCTTTCCCTTTTTTTTTT	41705
UDG_UG_f1TT_f2GTT	9216	28207	28207	0	CGCGAGCTCTTUGTTCTCGCGGGAACGCGAGAACGAAGAGCTCGCGACACTCTTTCCCTTTTTTTTTT	51727.9
UDG_UG_f1TC_f2GTC	5568	16589	16589	0	CGCGAGCTCTCUGTCCTCGCGGGAACGCGAGGACGGAGAGCTCGCGACACTCTTTCCCTTTTTTTTTT	32689.2
UDG_UG_f1GT_f2CAG	5241	15397	15397	0	CGCGAGCTCGTUCAGCTCGCGGGAACGCGAGCTGGACGAGCTCGCGACACTCTTTCCCTTTTTTTTTT	30340.3
UDG_UG_f1CA_f2AAG	7235	20702	20702	0	CGCGAGCTCCAUAAGCTCGCGGGAACGCGAGCTTGTGGAGCTCGCGACACTCTTTCCCTTTTTTTTTT	40794
UDG_UG_f1TG_f2GGC	5023	14375	14375	0	CGCGAGCTCTGUGGCCTCGCGGGAACGCGAGGCCGCAGAGCTCGCGACACTCTTTCCCTTTTTTTTTT	28326.4
UDG_UG_f1GC_f2GAT	3016	8775	8775	0	CGCGAGCTCGCUGATCTCGCGGGAACGCGAGATCGGCGAGCTCGCGACACTCTTTCCCTTTTTTTTTT	17291.4
UDG_UG_f1TT_f2AAG	3951	11167	11167	0	CGCGAGCTCTTUAAGCTCGCGGGAACGCGAGCTTGAAGAGCTCGCGACACTCTTTCCCTTTTTTTTTT	22005
UDG_UG_f1GA_f2GCT	3047	8628	8628	0	CGCGAGCTCGAUGCTCTCGCGGGAACGCGAGAGCGTCGAGCTCGCGACACTCTTTCCCTTTTTTTTTT	17001.8
UDG_UG_f1CT_f2CTC	16242	50103	49149	0	CGCGAGCTCCTUCTCCTCGCGGGAACGCGAGGAGGAGGAGCTCGCGACACTCTTTCCCTTTTTTTTTT	48545.9
UDG_UG_f1TA_f2GGA	12710	40036	40036	0	CGCGAGCTCTAUGGACTCGCGGGAACGCGAGTCCGTAGAGCTCGCGACACTCTTTCCCTTTTTTTTTT	39544.8
UDG_UG_f1AA_f2TTG	18328	57902	55467	0	CGCGAGCTCAAUTTGCTCGCGGGAACGCGAGCAAGTTGAGCTCGCGACACTCTTTCCCTTTTTTTTTT	54786.4
UDG_UG_f1TA_f2TGT	12975	40805	40805	0	CGCGAGCTCTAUTGTCTCGCGGGAACGCGAGACAGTAGAGCTCGCGACACTCTTTCCCTTTTTTTTTT	40304.3
UDG_UG_f1TA_f2CCA	11103	34294	34294	0	CGCGAGCTCTAUCCACTCGCGGGAACGCGAGTGGGTAGAGCTCGCGACACTCTTTCCCTTTTTTTTTT	33873.2
UDG_UG_f1AA_f2TGG	12532	40153	40153	0	CGCGAGCTCAAUTGGCTCGCGGGAACGCGAGCCAGTTGAGCTCGCGACACTCTTTCCCTTTTTTTTTT	39660.3
UDG_UG_f1GT_f2TGT	12175	37646	37646	0	CGCGAGCTCGTUTGTCTCGCGGGAACGCGAGACAGACGAGCTCGCGACACTCTTTCCCTTTTTTTTTT	36779.2
UDG_UG_f1CG_f2CCA	11319	35451	35451	0	CGCGAGCTCCGUCCACTCGCGGGAACGCGAGTGGGCGGAGCTCGCGACACTCTTTCCCTTTTTTTTTT	34415.8
UDG_UG_f1GC_f2TTG	11637	37028	37028	0	CGCGAGCTCGCUTTGCTCGCGGGAACGCGAGCAAGGCGAGCTCGCGACACTCTTTCCCTTTTTTTTTT	35162
UDG_UG_f1TT_f2TAG	11174	34974	34974	0	CGCGAGCTCTTUTAGCTCGCGGGAACGCGAGCTAGAAGAGCTCGCGACACTCTTTCCCTTTTTTTTTT	33086.4
UDG_UG_f1GA_f2CAC	12157	37333	37333	0	CGCGAGCTCGAUCACCTCGCGGGAACGCGAGGTGGTCGAGCTCGCGACACTCTTTCCCTTTTTTTTTT	35657.6
UDG_UG_f1TC_f2TCT	9854	31269	31269	0	CGCGAGCTCTCUTCTCTCGCGGGAACGCGAGAGAGGAGAGCTCGCGACACTCTTTCCCTTTTTTTTTT	29792.2
UDG_UG_f1GC_f2TCG	9351	27331	27331	0	CGCGAGCTCGCUTCGCTCGCGGGAACGCGAGCGAGGCGAGCTCGCGACACTCTTTCCCTTTTTTTTTT	26285.6
UDG_UG_f1AG_f2TGC	10664	32686	32686	0	CGCGAGCTCAGUTGCCTCGCGGGAACGCGAGGCAGCTGAGCTCGCGACACTCTTTCCCTTTTTTTTTT	31435.8
UDG_UG_f1TT_f2AGT	19344	61225	58545	0	CGCGAGCTCTTUAGTCTCGCGGGAACGCGAGACTGAAGAGCTCGCGACACTCTTTCCCTTTTTTTTTT	56253.3
UDG_UG_f1AG_f2TGC	12232	36931	36931	0	CGCGAGCTCAGUTGCCTCGCGGGAACGCGAGGCAGCTGAGCTCGCGACACTCTTTCCCTTTTTTTTTT	35485.3
UDG_UG_f1AT_f2GAC	13439	42293	42293	0	CGCGAGCTCATUGACCTCGCGGGAACGCGAGGTCGATGAGCTCGCGACACTCTTTCCCTTTTTTTTTT	40161.7
UDG_MM_GG	9716	29251	29251	0	CGCGAGCTCACGCTTACCGCGGGAACGCGGTAAGGGTGAGCTCGCGACACTCTTTCCCTTTTTTTTTT	27561.4
UDG_UG_f1CT_f2CCA	11664	35629	35629	0	CGCGAGCTCCTUCCACTCGCGGGAACGCGAGTGGGAGGAGCTCGCGACACTCTTTCCCTTTTTTTTTT	33090.9
UDG_UG_f1TA_f2AAA	18355	54879	55549	0	CGCGAGCTCTAUAAACTCGCGGGAACGCGAGTTTGTAGAGCTCGCGACACTCTTTCCCTTTTTTTTTT	51342.8
UDG_UG_f1CC_f2TTC	10067	30116	30116	0	CGCGAGCTCCCUTTCCTCGCGGGAACGCGAGGAAGGGGAGCTCGCGACACTCTTTCCCTTTTTTTTTT	27778.2
UDG_UG_f1GG_f2CCG	11919	35682	35682	0	CGCGAGCTCGGUCCGCTCGCGGGAACGCGAGCGGGCCGAGCTCGCGACACTCTTTCCCTTTTTTTTTT	33086.3
UDG_UG_f1GT_f2GTG	18441	57188	55810	0	CGCGAGCTCGTUGTGCTCGCGGGAACGCGAGCACGACGAGCTCGCGACACTCTTTCCCTTTTTTTTTT	52287.8
UDG_UG_f1AG_f2GTC	13632	41066	41066	0	CGCGAGCTCAGUGTCCTCGCGGGAACGCGAGGACGCTGAGCTCGCGACACTCTTTCCCTTTTTTTTTT	38534.6
UDG_UG_f1AT_f2GTC	16665	48940	48940	0	CGCGAGCTCATUGTCCTCGCGGGAACGCGAGGACGATGAGCTCGCGACACTCTTTCCCTTTTTTTTTT	45923.2
UDG_UG_f1AC_f2GAC	13404	39500	39500	0	CGCGAGCTCACUGACCTCGCGGGAACGCGAGGTCGGTGAGCTCGCGACACTCTTTCCCTTTTTTTTTT	37432
UDG_UG_f1CG_f2GAA	16242	50712	49149	0	CGCGAGCTCCGUGAACTCGCGGGAACGCGAGTTCGCGGAGCTCGCGACACTCTTTCCCTTTTTTTTTT	46575.8
UDG_UG_f1GT_f2AGT	16914	51513	51185	0	CGCGAGCTCGTUAGTCTCGCGGGAACGCGAGACTGACGAGCTCGCGACACTCTTTCCCTTTTTTTTTT	48140.5
UDG_UG_f1AT_f2ATA	31430	65535	95151	0	CGCGAGCTCATUATACTCGCGGGAACGCGAGTATGATGAGCTCGCGACACTCTTTCCCTTTTTTTTTT	90169.3
UDG_UG_f1CT_f2TCA	9742	30120	30120	0	CGCGAGCTCCTUTCACTCGCGGGAACGCGAGTGAGAGGAGCTCGCGACACTCTTTCCCTTTTTTTTTT	28588.3
UDG_UG_f1GG_f2GGT	13697	40926	40926	0	CGCGAGCTCGGUGGTCTCGCGGGAACGCGAGACCGCCGAGCTCGCGACACTCTTTCCCTTTTTTTTTT	39467.9
UDG_random_6b_4	10037	29125	29125	0	CGCGAGCTCTCACGCCTCGCGGGAACGCGAGGCGTGAGAGCTCGCGACACTCTTTCCCTTTTTTTTTT	28419.3
UDG_UG_f1TA_f2CCT	9133	26048	26048	0	CGCGAGCTCTAUCCTCTCGCGGGAACGCGAGAGGGTAGAGCTCGCGACACTCTTTCCCTTTTTTTTTT	25527.5
UDG_UG_f1CA_f2GCG	11691	33601	33601	0	CGCGAGCTCCAUGCGCTCGCGGGAACGCGAGCGCGTGGAGCTCGCGACACTCTTTCCCTTTTTTTTTT	33271.9
UDG_UG_f1CC_f2CGC	9456	28736	28736	0	CGCGAGCTCCCUCGCCTCGCGGGAACGCGAGGCGGGGGAGCTCGCGACACTCTTTCCCTTTTTTTTTT	28837.3
UDG_UG_f1CT_f2GTG	14407	43713	43713	0	CGCGAGCTCCTUGTGCTCGCGGGAACGCGAGCACGAGGAGCTCGCGACACTCTTTCCCTTTTTTTTTT	44080.2
UDG_UG_f1CA_f2ACC	13162	41283	41283	0	CGCGAGCTCCAUACCCTCGCGGGAACGCGAGGGTGTGGAGCTCGCGACACTCTTTCCCTTTTTTTTTT	41706.8
UDG_UG_f1CG_f2CTG	14126	40947	40947	0	CGCGAGCTCCGUCTGCTCGCGGGAACGCGAGCAGGCGGAGCTCGCGACACTCTTTCCCTTTTTTTTTT	41822.3
UDG_random_6b_8	10231	30859	30859	0	CGCGAGCTCAATACACTCGCGGGAACGCGAGTGTATTGAGCTCGCGACACTCTTTCCCTTTTTTTTTT	32745.7
UDG_UG_f1AT_f2CAG	12315	37908	37908	0	CGCGAGCTCATUCAGCTCGCGGGAACGCGAGCTGGATGAGCTCGCGACACTCTTTCCCTTTTTTTTTT	40972.3
UDG_UG_f1AA_f2GGA	11495	33931	33931	0	CGCGAGCTCAAUGGACTCGCGGGAACGCGAGTCCGTTGAGCTCGCGACACTCTTTCCCTTTTTTTTTT	36826
UDG_UG_f1CC_f2CTA	11414	33990	33990	0	CGCGAGCTCCCUCTACTCGCGGGAACGCGAGTAGGGGGAGCTCGCGACACTCTTTCCCTTTTTTTTTT	37330.6
UDG_UG_f1GT_f2GAA	11590	38054	38054	0	CGCGAGCTCGTUGAACTCGCGGGAACGCGAGTTCGACGAGCTCGCGACACTCTTTCCCTTTTTTTTTT	41838.6
UDG_UG_f1TC_f2TAA	9582	28642	28642	0	CGCGAGCTCTCUTAACTCGCGGGAACGCGAGTTAGGAGAGCTCGCGACACTCTTTCCCTTTTTTTTTT	32115.9
UDG_UG_f1CG_f2CCT	9024	26936	26936	0	CGCGAGCTCCGUCCTCTCGCGGGAACGCGAGAGGGCGGAGCTCGCGACACTCTTTCCCTTTTTTTTTT	30517.1
UDG_UG_f1AT_f2CGA	9893	29933	29933	0	CGCGAGCTCATUCGACTCGCGGGAACGCGAGTCGGATGAGCTCGCGACACTCTTTCCCTTTTTTTTTT	33987.2
UDG_UG_f1CC_f2CAT	9383	28419	28419	0	CGCGAGCTCCCUCATCTCGCGGGAACGCGAGATGGGGGAGCTCGCGACACTCTTTCCCTTTTTTTTTT	32728.2
UDG_UG_f1TT_f2GAA	10540	31689	31689	0	CGCGAGCTCTTUGAACTCGCGGGAACGCGAGTTCGAAGAGCTCGCGACACTCTTTCCCTTTTTTTTTT	36859.7
UDG_UG_f1GA_f2TAA	12544	36318	36318	0	CGCGAGCTCGAUTAACTCGCGGGAACGCGAGTTAGTCGAGCTCGCGACACTCTTTCCCTTTTTTTTTT	43318.2
UDG_MM_TC	10000	30948	30948	0	CGCGAGCTCACTCTTACCGCGGGAACGCGGTAAGCGTGAGCTCGCGACACTCTTTCCCTTTTTTTTTT	37234.7
UDG_UG_f1TC_f2CGG	10912	32891	32891	0	CGCGAGCTCTCUCGGCTCGCGGGAACGCGAGCCGGGAGAGCTCGCGACACTCTTTCCCTTTTTTTTTT	40627.6
UDG_UG_f1GC_f2ATG	14537	41944	41944	0	CGCGAGCTCGCUATGCTCGCGGGAACGCGAGCATGGCGAGCTCGCGACACTCTTTCCCTTTTTTTTTT	51965.6
UDG_UG_f1TC_f2GCT	8596	25381	25381	0	CGCGAGCTCTCUGCTCTCGCGGGAACGCGAGAGCGGAGAGCTCGCGACACTCTTTCCCTTTTTTTTTT	31692.6
UDG_UG_f1TT_f2ATG	18424	54301	55758	0	CGCGAGCTCTTUATGCTCGCGGGAACGCGAGCATGAAGAGCTCGCGACACTCTTTCCCTTTTTTTTTT	70791.8
UDG_UG_f1TC_f2CAC	7692	22835	22835	0	CGCGAGCTCTCUCACCTCGCGGGAACGCGAGGTGGGAGAGCTCGCGACACTCTTTCCCTTTTTTTTTT	29609.1
UDG_UG_f1GT_f2TCT	7286	20709	20709	0	CGCGAGCTCGTUTCTCTCGCGGGAACGCGAGAGAGACGAGCTCGCGACACTCTTTCCCTTTTTTTTTT	28137
UDG_UG_f1TC_f2CTT	8537	24441	24441	0	CGCGAGCTCTCUCTTCTCGCGGGAACGCGAGAAGGGAGAGCTCGCGACACTCTTTCCCTTTTTTTTTT	34204.6
UDG_UG_f1CC_f2CGC	8827	25593	25593	0	CGCGAGCTCCCUCGCCTCGCGGGAACGCGAGGCGGGGGAGCTCGCGACACTCTTTCCCTTTTTTTTTT	37353.4
UDG_UG_f1GT_f2AGG	10872	32721	32721	0	CGCGAGCTCGTUAGGCTCGCGGGAACGCGAGCCTGACGAGCTCGCGACACTCTTTCCCTTTTTTTTTT	48909.7
UDG_UG_f1CG_f2GTA	12449	36544	36544	0	CGCGAGCTCCGUGTACTCGCGGGAACGCGAGTACGCGGAGCTCGCGACACTCTTTCCCTTTTTTTTTT	57110.4
UDG_UG_f1TG_f2CGT	8323	24854	24854	0	CGCGAGCTCTGUCGTCTCGCGGGAACGCGAGACGGCAGAGCTCGCGACACTCTTTCCCTTTTTTTTTT	41899.5
UDG_UG_f1AA_f2GCC	8259	24225	24225	0	CGCGAGCTCAAUGCCCTCGCGGGAACGCGAGGGCGTTGAGCTCGCGACACTCTTTCCCTTTTTTTTTT	42632.4
UDG_UG_f1TC_f2TTG	6758	20090	20090	0	CGCGAGCTCTCUTTGCTCGCGGGAACGCGAGCAAGGAGAGCTCGCGACACTCTTTCCCTTTTTTTTTT	36842.4
UDG_UG_f1CG_f2TCA	6685	19821	19821	0	CGCGAGCTCCGUTCACTCGCGGGAACGCGAGTGAGCGGAGCTCGCGACACTCTTTCCCTTTTTTTTTT	39058
UDG_UG_f1GA_f2TTA	7271	21079	21079	0	CGCGAGCTCGAUTTACTCGCGGGAACGCGAGTAAGTCGAGCTCGCGACACTCTTTCCCTTTTTTTTTT	41536.9
UDG_UG_f1CG_f2GAC	6713	19894	19894	0	CGCGAGCTCCGUGACCTCGCGGGAACGCGAGGTCGCGGAGCTCGCGACACTCTTTCCCTTTTTTTTTT	39201.8
UDG_UG_f1TG_f2TAT	4440	12954	12954	0	CGCGAGCTCTGUTATCTCGCGGGAACGCGAGATAGCAGAGCTCGCGACACTCTTTCCCTTTTTTTTTT	25526.3
UDG_UG_f1CA_f2AAT	6165	17262	17262	0	CGCGAGCTCCAUAATCTCGCGGGAACGCGAGATTGTGGAGCTCGCGACACTCTTTCCCTTTTTTTTTT	34015.4
UDG_UG_f1GA_f2TAC	3106	8824	8824	0	CGCGAGCTCGAUTACCTCGCGGGAACGCGAGGTAGTCGAGCTCGCGACACTCTTTCCCTTTTTTTTTT	17388
UDG_UG_f1CT_f2GGG	2588	7255	7255	0	CGCGAGCTCCTUGGGCTCGCGGGAACGCGAGCCCGAGGAGCTCGCGACACTCTTTCCCTTTTTTTTTT	14296.2
UDG_UG_f1CA_f2AGC	15171	46151	46151	0	CGCGAGCTCCAUAGCCTCGCGGGAACGCGAGGCTGTGGAGCTCGCGACACTCTTTCCCTTTTTTTTTT	45584.7
UDG_UG_f1CC_f2GGC	11139	33547	33547	0	CGCGAGCTCCCUGGCCTCGCGGGAACGCGAGGCCGGGGAGCTCGCGACACTCTTTCCCTTTTTTTTTT	33135.4
UDG_UG_f1AG_f2AGG	18335	56631	55488	0	CGCGAGCTCAGUAGGCTCGCGGGAACGCGAGCCTGCTGAGCTCGCGACACTCTTTCCCTTTTTTTTTT	54807.2
UDG_UG_f1AA_f2GCA	17428	54536	52741	0	CGCGAGCTCAAUGCACTCGCGGGAACGCGAGTGCGTTGAGCTCGCGACACTCTTTCCCTTTTTTTTTT	52093.9
UDG_UG_f1CA_f2TGG	12039	38288	38288	0	CGCGAGCTCCAUTGGCTCGCGGGAACGCGAGCCAGTGGAGCTCGCGACACTCTTTCCCTTTTTTTTTT	37818.2
UDG_UG_f1GC_f2GCA	11836	36270	36270	0	CGCGAGCTCGCUGCACTCGCGGGAACGCGAGTGCGGCGAGCTCGCGACACTCTTTCCCTTTTTTTTTT	35825
UDG_UG_f1GA_f2CGC	13686	40915	40915	0	CGCGAGCTCGAUCGCCTCGCGGGAACGCGAGGCGGTCGAGCTCGCGACACTCTTTCCCTTTTTTTTTT	39973
UDG_UG_f1GA_f2AAT	28899	65535	87485	0	CGCGAGCTCGAUAATCTCGCGGGAACGCGAGATTGTCGAGCTCGCGACACTCTTTCCCTTTTTTTTTT	84930.3
UDG_UG_f1TC_f2TCT	8873	27718	27718	0	CGCGAGCTCTCUTCTCTCGCGGGAACGCGAGAGAGGAGAGCTCGCGACACTCTTTCCCTTTTTTTTTT	26321.2
UDG_UG_f1TT_f2TAC	9553	29976	29976	0	CGCGAGCTCTTUTACCTCGCGGGAACGCGAGGTAGAAGAGCTCGCGACACTCTTTCCCTTTTTTTTTT	28358.1
UDG_UG_f1AC_f2CGT	10529	31787	31787	0	CGCGAGCTCACUCGTCTCGCGGGAACGCGAGACGGGTGAGCTCGCGACACTCTTTCCCTTTTTTTTTT	30360.5
UDG_UG_f1AA_f2ACG	21236	63197	64275	0	CGCGAGCTCAAUACGCTCGCGGGAACGCGAGCGTGTTGAGCTCGCGACACTCTTTCCCTTTTTTTTTT	61239.4
UDG_MM_TC	10274	32642	32642	0	CGCGAGCTCACTCTTACCGCGGGAACGCGGTAAGCGTGAGCTCGCGACACTCTTTCCCTTTTTTTTTT	31393.5
UDG_UG_f1GA_f2AGA	20259	61594	61316	0	CGCGAGCTCGAUAGACTCGCGGGAACGCGAGTCTGTCGAGCTCGCGACACTCTTTCCCTTTTTTTTTT	58970.7
UDG_UG_f1GC_f2ATG	18732	58876	56691	0	CGCGAGCTCGCUATGCTCGCGGGAACGCGAGCATGGCGAGCTCGCGACACTCTTTCCCTTTTTTTTTT	54471.8
UDG_UG_f1TG_f2TGT	13476	42962	42962	0	CGCGAGCTCTGUTGTCTCGCGGGAACGCGAGACAGCAGAGCTCGCGACACTCTTTCCCTTTTTTTTTT	41280.3
UDG_UG_f1CG_f2GTA	22580	64747	68346	0	CGCGAGCTCCGUGTACTCGCGGGAACGCGAGTACGCGGAGCTCGCGACACTCTTTCCCTTTTTTTTTT	64901.8
UDG_UG_f1GC_f2AGG	11611	35592	35592	0	CGCGAGCTCGCUAGGCTCGCGGGAACGCGAGCCTGGCGAGCTCGCGACACTCTTTCCCTTTTTTTTTT	33536.1
UDG_UG_f1TG_f2GCA	15718	47721	47721	0	CGCGAGCTCTGUGCACTCGCGGGAACGCGAGTGCGCAGAGCTCGCGACACTCTTTCCCTTTTTTTTTT	44321.5
UDG_UG_f1TA_f2GCG	11467	35058	35058	0	CGCGAGCTCTAUGCGCTCGCGGGAACGCGAGCGCGTAGAGCTCGCGACACTCTTTCCCTTTTTTTTTT	32403.4
UDG_UG_f1CA_f2GGT	12088	36911	36911	0	CGCGAGCTCCAUGGTCTCGCGGGAACGCGAGACCGTGGAGCTCGCGACACTCTTTCCCTTTTTTTTTT	34045.8
UDG_UG_f1AC_f2AAC	13212	40729	40729	0	CGCGAGCTCACUAACCTCGCGGGAACGCGAGGTTGGTGAGCTCGCGACACTCTTTCCCTTTTTTTTTT	37766.2
UDG_UG_f1CC_f2CAT	14034	43027	43027	0	CGCGAGCTCCCUCATCTCGCGGGAACGCGAGATGGGGGAGCTCGCGACACTCTTTCCCTTTTTTTTTT	40311.6
UDG_UG_f1TA_f2AAC	18752	57307	56751	0	CGCGAGCTCTAUAACCTCGCGGGAACGCGAGGTTGTAGAGCTCGCGACACTCTTTCCCTTTTTTTTTT	53252.7
UDG_UG_f1GA_f2TGT	13451	42645	42645	0	CGCGAGCTCGAUTGTCTCGCGGGAACGCGAGACAGTCGAGCTCGCGACACTCTTTCCCTTTTTTTTTT	40016.2
UDG_UG_f1GG_f2GCA	14487	42165	42165	0	CGCGAGCTCGGUGCACTCGCGGGAACGCGAGTGCGCCGAGCTCGCGACACTCTTTCCCTTTTTTTTTT	39957.4
UDG_UG_f1TG_f2CGG	13002	39563	39563	0	CGCGAGCTCTGUCGGCTCGCGGGAACGCGAGCCGGCAGAGCTCGCGACACTCTTTCCCTTTTTTTTTT	37491.7
UDG_UG_f1AG_f2TCA	12072	37890	37890	0	CGCGAGCTCAGUTCACTCGCGGGAACGCGAGTGAGCTGAGCTCGCGACACTCTTTCCCTTTTTTTTTT	35636.3
UDG_UG_f1AA_f2TAT	11966	35543	35543	0	CGCGAGCTCAAUTATCTCGCGGGAACGCGAGATAGTTGAGCTCGCGACACTCTTTCCCTTTTTTTTTT	33682.1
UDG_UG_f1AG_f2AAA	30108	65535	91147	0	CGCGAGCTCAGUAAACTCGCGGGAACGCGAGTTTGCTGAGCTCGCGACACTCTTTCCCTTTTTTTTTT	86511.8
UDG_UG_f1GA_f2CCA	10631	33460	33460	0	CGCGAGCTCGAUCCACTCGCGGGAACGCGAGTGGGTCGAGCTCGCGACACTCTTTCCCTTTTTTTTTT	32267.9
UDG_UG_f1AA_f2CGA	13035	38659	38659	0	CGCGAGCTCAAUCGACTCGCGGGAACGCGAGTCGGTTGAGCTCGCGACACTCTTTCCCTTTTTTTTTT	37722.3
UDG_UG_f1TA_f2ACA	15504	45271	45271	0	CGCGAGCTCTAUACACTCGCGGGAACGCGAGTGTGTAGAGCTCGCGACACTCTTTCCCTTTTTTTTTT	44366.4
UDG_UG_f1GC_f2CAA	12753	36941	36941	0	CGCGAGCTCGCUCAACTCGCGGGAACGCGAGTTGGGCGAGCTCGCGACACTCTTTCCCTTTTTTTTTT	36579.2
UDG_UG_f1AT_f2CAC	12429	38185	38185	0	CGCGAGCTCATUCACCTCGCGGGAACGCGAGGTGGATGAGCTCGCGACACTCTTTCCCTTTTTTTTTT	38319.6
UDG_UG_f1AC_f2TGG	9724	29790	29790	0	CGCGAGCTCACUTGGCTCGCGGGAACGCGAGCCAGGTGAGCTCGCGACACTCTTTCCCTTTTTTTTTT	30040.3
UDG_UG_f1AA_f2AGC	16625	51805	50309	0	CGCGAGCTCAAUAGCCTCGCGGGAACGCGAGGCTGTTGAGCTCGCGACACTCTTTCCCTTTTTTTTTT	50825.5
UDG_UG_f1GC_f2AAG	13681	41993	41993	0	CGCGAGCTCGCUAAGCTCGCGGGAACGCGAGCTTGGCGAGCTCGCGACACTCTTTCCCTTTTTTTTTT	42890.6
UDG_UG_f1GG_f2GTA	17581	53152	53205	0	CGCGAGCTCGGUGTACTCGCGGGAACGCGAGTACGCCGAGCTCGCGACACTCTTTCCCTTTTTTTTTT	56457.9
UDG_UG_f1TC_f2AGG	10583	31456	31456	0	CGCGAGCTCTCUAGGCTCGCGGGAACGCGAGCCTGGAGAGCTCGCGACACTCTTTCCCTTTTTTTTTT	33998.8
UDG_UG_f1TT_f2ATC	25732	65535	77893	0	CGCGAGCTCTTUATCCTCGCGGGAACGCGAGGATGAAGAGCTCGCGACACTCTTTCCCTTTTTTTTTT	84538.8
UDG_UG_f1AT_f2ACC	12969	38971	38971	0	CGCGAGCTCATUACCCTCGCGGGAACGCGAGGGTGATGAGCTCGCGACACTCTTTCCCTTTTTTTTTT	42801.2
UDG_UG_f1TC_f2ATT	14349	42935	42935	0	CGCGAGCTCTCUATTCTCGCGGGAACGCGAGAATGGAGAGCTCGCGACACTCTTTCCCTTTTTTTTTT	47205
UDG_UG_f1TG_f2GGG	11328	32791	32791	0	CGCGAGCTCTGUGGGCTCGCGGGAACGCGAGCCCGCAGAGCTCGCGACACTCTTTCCCTTTTTTTTTT	36768.1
UDG_UG_f1GT_f2ATG	21287	63111	64429	0	CGCGAGCTCGTUATGCTCGCGGGAACGCGAGCATGACGAGCTCGCGACACTCTTTCCCTTTTTTTTTT	72994.7
UDG_UG_f1TC_f2CGA	7555	23320	23320	0	CGCGAGCTCTCUCGACTCGCGGGAACGCGAGTCGGGAGAGCTCGCGACACTCTTTCCCTTTTTTTTTT	26478.5
UDG_UG_f1AC_f2CCC	7040	19174	19174	0	CGCGAGCTCACUCCCCTCGCGGGAACGCGAGGGGGGTGAGCTCGCGACACTCTTTCCCTTTTTTTTTT	22081.4
UDG_UG_f1GC_f2TAT	10443	31038	31038	0	CGCGAGCTCGCUTATCTCGCGGGAACGCGAGATAGGCGAGCTCGCGACACTCTTTCCCTTTTTTTTTT	36102.5
UDG_UG_f1TT_f2TCC	8445	23738	23738	0	CGCGAGCTCTTUTCCCTCGCGGGAACGCGAGGGAGAAGAGCTCGCGACACTCTTTCCCTTTTTTTTTT	28313.4
UDG_UG_f1CC_f2AGA	10605	30878	30878	0	CGCGAGCTCCCUAGACTCGCGGGAACGCGAGTCTGGGGAGCTCGCGACACTCTTTCCCTTTTTTTTTT	37150.5
UDG_UG_f1AC_f2ATA	11126	33586	33586	0	CGCGAGCTCACUATACTCGCGGGAACGCGAGTATGGTGAGCTCGCGACACTCTTTCCCTTTTTTTTTT	41486.1
UDG_UG_f1CT_f2GCG	13164	38777	38777	0	CGCGAGCTCCTUGCGCTCGCGGGAACGCGAGCGCGAGGAGCTCGCGACACTCTTTCCCTTTTTTTTTT	48041.9
UDG_UG_f1TA_f2CCG	12361	36970	36970	0	CGCGAGCTCTAUCCGCTCGCGGGAACGCGAGCGGGTAGAGCTCGCGACACTCTTTCCCTTTTTTTTTT	46163.4
UDG_UG_f1AC_f2AAA	14256	42536	42536	0	CGCGAGCTCACUAAACTCGCGGGAACGCGAGTTTGGTGAGCTCGCGACACTCTTTCCCTTTTTTTTTT	54004.8
UDG_UG_f1TG_f2CTT	11846	36564	36564	0	CGCGAGCTCTGUCTTCTCGCGGGAACGCGAGAAGGCAGAGCTCGCGACACTCTTTCCCTTTTTTTTTT	47410.9
UDG_UG_f1AA_f2AAC	16243	47362	47362	0	CGCGAGCTCAAUAACCTCGCGGGAACGCGAGGTTGTTGAGCTCGCGACACTCTTTCCCTTTTTTTTTT	64350
UDG_UG_f1CA_f2GCA	12340	36032	36032	0	CGCGAGCTCCAUGCACTCGCGGGAACGCGAGTGCGTGGAGCTCGCGACACTCTTTCCCTTTTTTTTTT	50425.9
UDG_UG_f1TA_f2ATA	15721	46653	46653	0	CGCGAGCTCTAUATACTCGCGGGAACGCGAGTATGTAGAGCTCGCGACACTCTTTCCCTTTTTTTTTT	68090.8
UDG_UG_f1CT_f2ACT	12112	36661	36661	0	CGCGAGCTCCTUACTCTCGCGGGAACGCGAGAGTGAGGAGCTCGCGACACTCTTTCCCTTTTTTTTTT	54799
UDG_UG_f1GA_f2GCG	10574	31764	31764	0	CGCGAGCTCGAUGCGCTCGCGGGAACGCGAGCGCGTCGAGCTCGCGACACTCTTTCCCTTTTTTTTTT	49640.3
UDG_UG_f1AA_f2ACC	10435	30166	30166	0	CGCGAGCTCAAUACCCTCGCGGGAACGCGAGGGTGTTGAGCTCGCGACACTCTTTCCCTTTTTTTTTT	50854.6
UDG_UG_f1CG_f2AGG	10584	30852	30852	0	CGCGAGCTCCGUAGGCTCGCGGGAACGCGAGCCTGCGGAGCTCGCGACACTCTTTCCCTTTTTTTTTT	54295
UDG_UG_f1AT_f2TCC	6800	20426	20426	0	CGCGAGCTCATUTCCCTCGCGGGAACGCGAGGGAGATGAGCTCGCGACACTCTTTCCCTTTTTTTTTT	37458.6
UDG_UG_f1TG_f2GCG	8130	24262	24262	0	CGCGAGCTCTGUGCGCTCGCGGGAACGCGAGCGCGCAGAGCTCGCGACACTCTTTCCCTTTTTTTTTT	47809.1
UDG_UG_f1CC_f2CTG	6289	18790	18790	0	CGCGAGCTCCCUCTGCTCGCGGGAACGCGAGCAGGGGGAGCTCGCGACACTCTTTCCCTTTTTTTTTT	37026.4
UDG_UG_f1GG_f2AAG	8710	26083	26083	0	CGCGAGCTCGGUAAGCTCGCGGGAACGCGAGCTTGCCGAGCTCGCGACACTCTTTCCCTTTTTTTTTT	51397.5
UDG_UG_f1CT_f2AGT	5780	17185	17185	0	CGCGAGCTCCTUAGTCTCGCGGGAACGCGAGACTGAGGAGCTCGCGACACTCTTTCCCTTTTTTTTTT	33863.6
UDG_UG_random_3U	4556	13256	13256	0	CGCGUCTACUCTUTATGCGCGGGAACGCGCATAGAGGGTAGGCGCGACACTCTTTCCCTTTTTTTTTT	26121.4
UDG_UG_f1TT_f2ACC	4141	11872	11872	0	CGCGAGCTCTTUACCCTCGCGGGAACGCGAGGGTGAAGAGCTCGCGACACTCTTTCCCTTTTTTTTTT	23394.2
UDG_UG_f1AG_f2ATA	5733	17270	17270	0	CGCGAGCTCAGUATACTCGCGGGAACGCGAGTATGCTGAGCTCGCGACACTCTTTCCCTTTTTTTTTT	34031.1
UDG_UG_f1AA_f2CCT	10588	33900	33900	0	CGCGAGCTCAAUCCTCTCGCGGGAACGCGAGAGGGTTGAGCTCGCGACACTCTTTCCCTTTTTTTTTT	33484
UDG_UG_f1CT_f2CTA	17142	56781	51875	0	CGCGAGCTCCTUCTACTCGCGGGAACGCGAGTAGGAGGAGCTCGCGACACTCTTTCCCTTTTTTTTTT	51238.5
UDG_UG_f1TT_f2ACT	15621	53380	47268	0	CGCGAGCTCTTUACTCTCGCGGGAACGCGAGAGTGAAGAGCTCGCGACACTCTTTCCCTTTTTTTTTT	46688
UDG_UG_f1AC_f2AAG	13305	45633	45633	0	CGCGAGCTCACUAAGCTCGCGGGAACGCGAGCTTGGTGAGCTCGCGACACTCTTTCCCTTTTTTTTTT	45073.1
UDG_UG_f1CC_f2TGG	9917	33472	33472	0	CGCGAGCTCCCUTGGCTCGCGGGAACGCGAGCCAGGGGAGCTCGCGACACTCTTTCCCTTTTTTTTTT	33061.3
UDG_UG_f1AT_f2GAC	13840	48132	48132	0	CGCGAGCTCATUGACCTCGCGGGAACGCGAGGTCGATGAGCTCGCGACACTCTTTCCCTTTTTTTTTT	47541.4
UDG_UG_f1TG_f2CTC	13960	46643	46643	0	CGCGAGCTCTGUCTCCTCGCGGGAACGCGAGGAGGCAGAGCTCGCGACACTCTTTCCCTTTTTTTTTT	45569.1
UDG_UG_f1AG_f2GGA	14007	46092	46092	0	CGCGAGCTCAGUGGACTCGCGGGAACGCGAGTCCGCTGAGCTCGCGACACTCTTTCCCTTTTTTTTTT	44746
UDG_UG_f1GA_f2TCA	10840	37612	37612	0	CGCGAGCTCGAUTCACTCGCGGGAACGCGAGTGAGTCGAGCTCGCGACACTCTTTCCCTTTTTTTTTT	35716.6
UDG_UG_f1CC_f2CCG	8332	27377	27377	0	CGCGAGCTCCCUCCGCTCGCGGGAACGCGAGCGGGGGGAGCTCGCGACACTCTTTCCCTTTTTTTTTT	25899.4
UDG_UG_f1AC_f2AAG	12397	42612	42612	0	CGCGAGCTCACUAAGCTCGCGGGAACGCGAGCTTGGTGAGCTCGCGACACTCTTTCCCTTTTTTTTTT	40699.7
UDG_UG_f1TG_f2TAA	11574	39644	39644	0	CGCGAGCTCTGUTAACTCGCGGGAACGCGAGTTAGCAGAGCTCGCGACACTCTTTCCCTTTTTTTTTT	37771.7
UDG_UG_f1GC_f2CTT	9368	32192	32192	0	CGCGAGCTCGCUCTTCTCGCGGGAACGCGAGAAGGGCGAGCTCGCGACACTCTTTCCCTTTTTTTTTT	30960.7
UDG_UG_f1TT_f2GTC	15433	52512	46699	0	CGCGAGCTCTTUGTCCTCGCGGGAACGCGAGGACGAAGAGCTCGCGACACTCTTTCCCTTTTTTTTTT	44912.8
UDG_UG_f1GT_f2AGT	16043	56462	48546	0	CGCGAGCTCGTUAGTCTCGCGGGAACGCGAGACTGACGAGCTCGCGACACTCTTTCCCTTTTTTTTTT	46645.7
UDG_MM_TT	10503	36163	36163	0	CGCGAGCTCACTCTTACCGCGGGAACGCGGTAAGTGTGAGCTCGCGACACTCTTTCCCTTTTTTTTTT	34747.4
UDG_UG_f1TT_f2TCA	11353	39576	39576	0	CGCGAGCTCTTUTCACTCGCGGGAACGCGAGTGAGAAGAGCTCGCGACACTCTTTCCCTTTTTTTTTT	37581.6
UDG_UG_f1CT_f2CGA	11358	39157	39157	0	CGCGAGCTCCTUCGACTCGCGGGAACGCGAGTCGGAGGAGCTCGCGACACTCTTTCCCTTTTTTTTTT	36895.2
UDG_UG_f1CC_f2AAA	16050	53710	48568	0	CGCGAGCTCCCUAAACTCGCGGGAACGCGAGTTTGGGGAGCTCGCGACACTCTTTCCCTTTTTTTTTT	45108.1
UDG_UG_random_5U	9387	31088	31088	0	CGCGCGAGUUAACUUUGCGCGGGAACGCGCGGGGTTGGCTCGCGCGACACTCTTTCCCTTTTTTTTTT	28734
UDG_UG_f1AT_f2GCA	12876	40430	40430	0	CGCGAGCTCATUGCACTCGCGGGAACGCGAGTGCGATGAGCTCGCGACACTCTTTCCCTTTTTTTTTT	37291.6
UDG_UG_f1CC_f2GCA	12283	38975	38975	0	CGCGAGCTCCCUGCACTCGCGGGAACGCGAGTGCGGGGAGCTCGCGACACTCTTTCCCTTTTTTTTTT	36139.8
UDG_UG_f1CT_f2GCC	11788	38605	38605	0	CGCGAGCTCCTUGCCCTCGCGGGAACGCGAGGGCGAGGAGCTCGCGACACTCTTTCCCTTTTTTTTTT	36168.6
UDG_UG_f1AA_f2TAA	15106	50644	45708	0	CGCGAGCTCAAUTAACTCGCGGGAACGCGAGTTAGTTGAGCTCGCGACACTCTTTCCCTTTTTTTTTT	42890.4
UDG_UG_f1AC_f2CAG	9837	33198	33198	0	CGCGAGCTCACUCAGCTCGCGGGAACGCGAGCTGGGTGAGCTCGCGACACTCTTTCCCTTTTTTTTTT	31151.6
UDG_UG_f1GG_f2CTT	12877	42913	42913	0	CGCGAGCTCGGUCTTCTCGCGGGAACGCGAGAAGGCCGAGCTCGCGACACTCTTTCCCTTTTTTTTTT	40666.3
UDG_UG_f1CT_f2CTC	14561	49024	49024	0	CGCGAGCTCCTUCTCCTCGCGGGAACGCGAGGAGGAGGAGCTCGCGACACTCTTTCCCTTTTTTTTTT	46457.3
UDG_UG_f1CA_f2TAG	11655	38777	38777	0	CGCGAGCTCCAUTAGCTCGCGGGAACGCGAGCTAGTGGAGCTCGCGACACTCTTTCCCTTTTTTTTTT	36470.5
UDG_UG_f1TT_f2CTA	16099	50869	48716	0	CGCGAGCTCTTUCTACTCGCGGGAACGCGAGTAGGAAGAGCTCGCGACACTCTTTCCCTTTTTTTTTT	46165.4
UDG_UG_f1AC_f2TCT	9610	32857	32857	0	CGCGAGCTCACUTCTCTCGCGGGAACGCGAGAGAGGTGAGCTCGCGACACTCTTTCCCTTTTTTTTTT	31186.1
UDG_UG_f1GG_f2TTC	11273	37941	37941	0	CGCGAGCTCGGUTTCCTCGCGGGAACGCGAGGAAGCCGAGCTCGCGACACTCTTTCCCTTTTTTTTTT	36589.2
UDG_UG_f1CG_f2GCA	12778	40311	40311	0	CGCGAGCTCCGUGCACTCGCGGGAACGCGAGTGCGCGGAGCTCGCGACACTCTTTCCCTTTTTTTTTT	39334.3
UDG_UG_f1CC_f2GAA	10926	35010	35010	0	CGCGAGCTCCCUGAACTCGCGGGAACGCGAGTTCGGGGAGCTCGCGACACTCTTTCCCTTTTTTTTTT	34310.4
UDG_UG_f1CA_f2ATA	20561	61847	62231	0	CGCGAGCTCCAUATACTCGCGGGAACGCGAGTATGTGGAGCTCGCGACACTCTTTCCCTTTTTTTTTT	61621.4
UDG_UG_f1TC_f2GCG	8696	28273	28273	0	CGCGAGCTCTCUGCGCTCGCGGGAACGCGAGCGCGGAGAGCTCGCGACACTCTTTCCCTTTTTTTTTT	28372.7
UDG_UG_f1TG_f2GGG	10336	34230	34230	0	CGCGAGCTCTGUGGGCTCGCGGGAACGCGAGCCCGCAGAGCTCGCGACACTCTTTCCCTTTTTTTTTT	34517.6
UDG_UG_f1TC_f2TCC	8125	27126	27126	0	CGCGAGCTCTCUTCCCTCGCGGGAACGCGAGGGAGGAGAGCTCGCGACACTCTTTCCCTTTTTTTTTT	27404.5
UDG_UG_f1GT_f2CAG	10147	33972	33972	0	CGCGAGCTCGTUCAGCTCGCGGGAACGCGAGCTGGACGAGCTCGCGACACTCTTTCCCTTTTTTTTTT	34698.2
UDG_UG_f1AG_f2GCA	10982	36233	36233	0	CGCGAGCTCAGUGCACTCGCGGGAACGCGAGTGCGCTGAGCTCGCGACACTCTTTCCCTTTTTTTTTT	38448.3
UDG_UG_f1AA_f2ACC	15025	49058	49058	0	CGCGAGCTCAAUACCCTCGCGGGAACGCGAGGGTGTTGAGCTCGCGACACTCTTTCCCTTTTTTTTTT	53023.7
UDG_UG_f1CA_f2TCT	8909	28260	28260	0	CGCGAGCTCCAUTCTCTCGCGGGAACGCGAGAGAGTGGAGCTCGCGACACTCTTTCCCTTTTTTTTTT	30671.1
UDG_UG_f1CA_f2CCG	9660	32110	32110	0	CGCGAGCTCCAUCCGCTCGCGGGAACGCGAGCGGGTGGAGCTCGCGACACTCTTTCCCTTTTTTTTTT	35265.8
UDG_UG_f1TA_f2GAA	11372	36358	36358	0	CGCGAGCTCTAUGAACTCGCGGGAACGCGAGTTCGTAGAGCTCGCGACACTCTTTCCCTTTTTTTTTT	39973.9
UDG_UG_f1TG_f2TAG	10044	32286	32286	0	CGCGAGCTCTGUTAGCTCGCGGGAACGCGAGCTAGCAGAGCTCGCGACACTCTTTCCCTTTTTTTTTT	36201.9
UDG_UG_f1CC_f2AAG	10067	32947	32947	0	CGCGAGCTCCCUAAGCTCGCGGGAACGCGAGCTTGGGGAGCTCGCGACACTCTTTCCCTTTTTTTTTT	37327.2
UDG_UG_f1CG_f2CGA	10436	32722	32722	0	CGCGAGCTCCGUCGACTCGCGGGAACGCGAGTCGGCGGAGCTCGCGACACTCTTTCCCTTTTTTTTTT	37153.9
UDG_UG_f1CT_f2ATG	20715	63146	62697	0	CGCGAGCTCCTUATGCTCGCGGGAACGCGAGCATGAGGAGCTCGCGACACTCTTTCCCTTTTTTTTTT	72203.9
UDG_UG_f1TC_f2TAG	14454	47670	47670	0	CGCGAGCTCTCUTAGCTCGCGGGAACGCGAGCTAGGAGAGCTCGCGACACTCTTTCCCTTTTTTTTTT	55448.3
UDG_UG_f1GA_f2ATG	21634	65535	65480	0	CGCGAGCTCGAUATGCTCGCGGGAACGCGAGCATGTCGAGCTCGCGACACTCTTTCCCTTTTTTTTTT	78101.1
UDG_UG_f1GT_f2TTC	9889	30216	30216	0	CGCGAGCTCGTUTTCCTCGCGGGAACGCGAGGAAGACGAGCTCGCGACACTCTTTCCCTTTTTTTTTT	36354
UDG_UG_f1GA_f2CCT	8839	27426	27426	0	CGCGAGCTCGAUCCTCTCGCGGGAACGCGAGAGGGTCGAGCTCGCGACACTCTTTCCCTTTTTTTTTT	33877.2
UDG_UG_f1AA_f2CTG	13991	47413	47413	0	CGCGAGCTCAAUCTGCTCGCGGGAACGCGAGCAGGTTGAGCTCGCGACACTCTTTCCCTTTTTTTTTT	58741.3
UDG_UG_f1GA_f2TGC	12066	38387	38387	0	CGCGAGCTCGAUTGCCTCGCGGGAACGCGAGGCAGTCGAGCTCGCGACACTCTTTCCCTTTTTTTTTT	47932.8
UDG_UG_f1CG_f2ACT	15771	49711	49711	0	CGCGAGCTCCGUACTCTCGCGGGAACGCGAGAGTGCGGAGCTCGCGACACTCTTTCCCTTTTTTTTTT	63114.3
UDG_UG_f1TT_f2CTC	9442	30801	30801	0	CGCGAGCTCTTUCTCCTCGCGGGAACGCGAGGAGGAAGAGCTCGCGACACTCTTTCCCTTTTTTTTTT	39938.3
UDG_UG_f1TA_f2TTG	8678	27886	27886	0	CGCGAGCTCTAUTTGCTCGCGGGAACGCGAGCAAGTAGAGCTCGCGACACTCTTTCCCTTTTTTTTTT	37888.3
UDG_UG_f1AT_f2AGG	10583	35083	35083	0	CGCGAGCTCATUAGGCTCGCGGGAACGCGAGCCTGATGAGCTCGCGACACTCTTTCCCTTTTTTTTTT	49097.8
UDG_UG_f1GA_f2CAT	10369	33134	33134	0	CGCGAGCTCGAUCATCTCGCGGGAACGCGAGATGGTCGAGCTCGCGACACTCTTTCCCTTTTTTTTTT	48359.6
UDG_UG_f1TT_f2CAC	8860	28134	28134	0	CGCGAGCTCTTUCACCTCGCGGGAACGCGAGGTGGAAGAGCTCGCGACACTCTTTCCCTTTTTTTTTT	42053.3
UDG_UG_f1GA_f2AAG	12177	39198	39198	0	CGCGAGCTCGAUAAGCTCGCGGGAACGCGAGCTTGTCGAGCTCGCGACACTCTTTCCCTTTTTTTTTT	61258
UDG_UG_f1GG_f2GTT	10247	31864	31864	0	CGCGAGCTCGGUGTTCTCGCGGGAACGCGAGAACGCCGAGCTCGCGACACTCTTTCCCTTTTTTTTTT	53717.1
UDG_UG_f1GC_f2CAA	7278	23931	23931	0	CGCGAGCTCGCUCAACTCGCGGGAACGCGAGTTGGGCGAGCTCGCGACACTCTTTCCCTTTTTTTTTT	42115
UDG_UG_f1GA_f2CAA	6702	21859	21859	0	CGCGAGCTCGAUCAACTCGCGGGAACGCGAGTTGGTCGAGCTCGCGACACTCTTTCCCTTTTTTTTTT	40086.5
UDG_UG_f1AA_f2TGT	8100	25362	25362	0	CGCGAGCTCAAUTGTCTCGCGGGAACGCGAGACAGTTGAGCTCGCGACACTCTTTCCCTTTTTTTTTT	49976.7
UDG_UG_f1CT_f2ATG	12643	41268	41268	0	CGCGAGCTCCTUATGCTCGCGGGAACGCGAGCATGAGGAGCTCGCGACACTCTTTCCCTTTTTTTTTT	81320
UDG_UG_f1AC_f2GGT	4053	12485	12485	0	CGCGAGCTCACUGGTCTCGCGGGAACGCGAGACCGGTGAGCTCGCGACACTCTTTCCCTTTTTTTTTT	24602.1
UDG_UG_f1GA_f2ACT	4600	14069	14069	0	CGCGAGCTCGAUACTCTCGCGGGAACGCGAGAGTGTCGAGCTCGCGACACTCTTTCCCTTTTTTTTTT	27723.5
UDG_UG_f1AT_f2CAG	3693	11594	11594	0	CGCGAGCTCATUCAGCTCGCGGGAACGCGAGCTGGATGAGCTCGCGACACTCTTTCCCTTTTTTTTTT	22846.4
UDG_UG_f1TT_f2CCT	2933	8880	8880	0	CGCGAGCTCTTUCCTCTCGCGGGAACGCGAGAGGGAAGAGCTCGCGACACTCTTTCCCTTTTTTTTTT	17498.4
UDG_UG_f1TT_f2GAA	2651	7912	7912	0	CGCGAGCTCTTUGAACTCGCGGGAACGCGAGTTCGAAGAGCTCGCGACACTCTTTCCCTTTTTTTTTT	15590.9
UDG_UG_f1CA_f2GTC	11230	32079	32079	0	CGCGAGCTCCAUGTCCTCGCGGGAACGCGAGGACGTGGAGCTCGCGACACTCTTTCCCTTTTTTTTTT	30823.3
UDG_UG_f1CT_f2CAC	11900	34003	34003	0	CGCGAGCTCCTUCACCTCGCGGGAACGCGAGGTGGAGGAGCTCGCGACACTCTTTCCCTTTTTTTTTT	32672
UDG_UG_f1AA_f2TGA	12556	36711	36711	0	CGCGAGCTCAAUTGACTCGCGGGAACGCGAGTCAGTTGAGCTCGCGACACTCTTTCCCTTTTTTTTTT	35274
UDG_UG_f1TG_f2CCT	12142	36015	36015	0	CGCGAGCTCTGUCCTCTCGCGGGAACGCGAGAGGGCAGAGCTCGCGACACTCTTTCCCTTTTTTTTTT	34605.2
UDG_UG_f1TA_f2GAA	13141	40695	40695	0	CGCGAGCTCTAUGAACTCGCGGGAACGCGAGTTCGTAGAGCTCGCGACACTCTTTCCCTTTTTTTTTT	39102
UDG_UG_f1TG_f2CAT	13735	41833	41833	0	CGCGAGCTCTGUCATCTCGCGGGAACGCGAGATGGCAGAGCTCGCGACACTCTTTCCCTTTTTTTTTT	40195.4
UDG_UG_f1CC_f2AAC	15384	48538	48538	0	CGCGAGCTCCCUAACCTCGCGGGAACGCGAGGTTGGGGAGCTCGCGACACTCTTTCCCTTTTTTTTTT	46638
UDG_UG_f1GA_f2AGC	19586	58431	59277	0	CGCGAGCTCGAUAGCCTCGCGGGAACGCGAGGCTGTCGAGCTCGCGACACTCTTTCCCTTTTTTTTTT	56956.6
UDG_UG_f1CC_f2CTC	12612	37359	37359	0	CGCGAGCTCCCUCTCCTCGCGGGAACGCGAGGAGGGGGAGCTCGCGACACTCTTTCCCTTTTTTTTTT	35145.7
UDG_UG_f1GT_f2ATG	33564	65535	101614	0	CGCGAGCTCGTUATGCTCGCGGGAACGCGAGCATGACGAGCTCGCGACACTCTTTCCCTTTTTTTTTT	95594.1
UDG_UG_f1GC_f2AAT	17703	55921	53574	0	CGCGAGCTCGCUAATCTCGCGGGAACGCGAGATTGGCGAGCTCGCGACACTCTTTCCCTTTTTTTTTT	50203.1
UDG_UG_f1GT_f2TCC	10927	33287	33287	0	CGCGAGCTCGTUTCCCTCGCGGGAACGCGAGGGAGACGAGCTCGCGACACTCTTTCCCTTTTTTTTTT	31192.6
UDG_UG_f1CT_f2CGG	11934	35627	35627	0	CGCGAGCTCCTUCGGCTCGCGGGAACGCGAGCCGGAGGAGCTCGCGACACTCTTTCCCTTTTTTTTTT	33443.5
UDG_UG_f1AC_f2TCC	9989	30728	30728	0	CGCGAGCTCACUTCCCTCGCGGGAACGCGAGGGAGGTGAGCTCGCGACACTCTTTCCCTTTTTTTTTT	28844.8
UDG_UG_f1GA_f2ATA	33346	65535	100954	0	CGCGAGCTCGAUATACTCGCGGGAACGCGAGTATGTCGAGCTCGCGACACTCTTTCCCTTTTTTTTTT	95122.5
UDG_UG_f1GC_f2TTT	12065	39613	39613	0	CGCGAGCTCGCUTTTCTCGCGGGAACGCGAGAAAGGCGAGCTCGCGACACTCTTTCCCTTTTTTTTTT	37541.9
UDG_UG_f1AG_f2ATG	30746	65535	93079	0	CGCGAGCTCAGUATGCTCGCGGGAACGCGAGCATGCTGAGCTCGCGACACTCTTTCCCTTTTTTTTTT	88212.5
UDG_UG_f1GG_f2AAG	28164	65535	85259	0	CGCGAGCTCGGUAAGCTCGCGGGAACGCGAGCTTGCCGAGCTCGCGACACTCTTTCCCTTTTTTTTTT	80801.4
UDG_UG_f1TC_f2GGT	9239	28045	28045	0	CGCGAGCTCTCUGGTCTCGCGGGAACGCGAGACCGGAGAGCTCGCGACACTCTTTCCCTTTTTTTTTT	26326.2
UDG_MM_TT	9903	29952	29952	0	CGCGAGCTCACTCTTACCGCGGGAACGCGGTAAGTGTGAGCTCGCGACACTCTTTCCCTTTTTTTTTT	27706.1
UDG_UG_f1TC_f2GGA	10710	33110	33110	0	CGCGAGCTCTCUGGACTCGCGGGAACGCGAGTCCGGAGAGCTCGCGACACTCTTTCCCTTTTTTTTTT	30424.3
UDG_UG_f1CT_f2ATC	25361	65535	76769	0	CGCGAGCTCCTUATCCTCGCGGGAACGCGAGGATGAGGAGCTCGCGACACTCTTTCCCTTTTTTTTTT	69758.5
UDG_UG_f1GG_f2CGT	13772	39173	39173	0	CGCGAGCTCGGUCGTCTCGCGGGAACGCGAGACGGCCGAGCTCGCGACACTCTTTCCCTTTTTTTTTT	35438
UDG_UG_f1TG_f2TTC	13847	41566	41566	0	CGCGAGCTCTGUTTCCTCGCGGGAACGCGAGGAAGCAGAGCTCGCGACACTCTTTCCCTTTTTTTTTT	37935.4
UDG_UG_f1AC_f2CAG	11765	36386	36386	0	CGCGAGCTCACUCAGCTCGCGGGAACGCGAGCTGGGTGAGCTCGCGACACTCTTTCCCTTTTTTTTTT	33495.8
UDG_UG_f1CG_f2GAA	18381	52851	55628	0	CGCGAGCTCCGUGAACTCGCGGGAACGCGAGTTCGCGGAGCTCGCGACACTCTTTCCCTTTTTTTTTT	51227.2
UDG_UG_f1CG_f2ATC	29170	65535	88306	0	CGCGAGCTCCGUATCCTCGCGGGAACGCGAGGATGCGGAGCTCGCGACACTCTTTCCCTTTTTTTTTT	81320
UDG_UG_f1TT_f2TTT	13260	40277	40277	0	CGCGAGCTCTTUTTTCTCGCGGGAACGCGAGAAAGAAGAGCTCGCGACACTCTTTCCCTTTTTTTTTT	37150.5
UDG_UG_f1GG_f2GCT	14468	40884	40884	0	CGCGAGCTCGGUGCTCTCGCGGGAACGCGAGAGCGCCGAGCTCGCGACACTCTTTCCCTTTTTTTTTT	38130.7
UDG_UG_f1TT_f2CGA	15922	50981	48180	0	CGCGAGCTCTTUCGACTCGCGGGAACGCGAGTCGGAAGAGCTCGCGACACTCTTTCCCTTTTTTTTTT	45139.4
UDG_UG_f1AT_f2GTC	19422	59579	58781	0	CGCGAGCTCATUGTCCTCGCGGGAACGCGAGGACGATGAGCTCGCGACACTCTTTCCCTTTTTTTTTT	54620.9
UDG_UG_f1AT_f2GGG	11325	33928	33928	0	CGCGAGCTCATUGGGCTCGCGGGAACGCGAGCCCGATGAGCTCGCGACACTCTTTCCCTTTTTTTTTT	31836.6
UDG_UG_f1GG_f2AGT	22393	65484	67779	0	CGCGAGCTCGGUAGTCTCGCGGGAACGCGAGACTGCCGAGCTCGCGACACTCTTTCCCTTTTTTTTTT	63747.4
UDG_UG_f1CC_f2CTG	10499	32557	32557	0	CGCGAGCTCCCUCTGCTCGCGGGAACGCGAGCAGGGGGAGCTCGCGACACTCTTTCCCTTTTTTTTTT	31183.4
UDG_UG_f1CT_f2ATC	26172	65535	79225	0	CGCGAGCTCCTUATCCTCGCGGGAACGCGAGGATGAGGAGCTCGCGACACTCTTTCCCTTTTTTTTTT	76739
UDG_UG_f1TG_f2TAG	14879	42546	42546	0	CGCGAGCTCTGUTAGCTCGCGGGAACGCGAGCTAGCAGAGCTCGCGACACTCTTTCCCTTTTTTTTTT	41515.1
UDG_UG_f1TC_f2ACG	11105	34317	34317	0	CGCGAGCTCTCUACGCTCGCGGGAACGCGAGCGTGGAGAGCTCGCGACACTCTTTCCCTTTTTTTTTT	33631.3
UDG_UG_f1GC_f2GAT	10840	32792	32792	0	CGCGAGCTCGCUGATCTCGCGGGAACGCGAGATCGGCGAGCTCGCGACACTCTTTCCCTTTTTTTTTT	32432.8
UDG_UG_f1CT_f2CAA	12058	35622	35622	0	CGCGAGCTCCTUCAACTCGCGGGAACGCGAGTTGGAGGAGCTCGCGACACTCTTTCCCTTTTTTTTTT	35769.8
UDG_UG_f1GA_f2CTG	13214	39141	39141	0	CGCGAGCTCGAUCTGCTCGCGGGAACGCGAGCAGGTCGAGCTCGCGACACTCTTTCCCTTTTTTTTTT	39363
UDG_UG_f1TA_f2CGG	10885	31019	31019	0	CGCGAGCTCTAUCGGCTCGCGGGAACGCGAGCCGGTAGAGCTCGCGACACTCTTTCCCTTTTTTTTTT	31532.1
UDG_UG_f1TC_f2GAT	10972	33620	33620	0	CGCGAGCTCTCUGATCTCGCGGGAACGCGAGATCGGAGAGCTCGCGACACTCTTTCCCTTTTTTTTTT	34670.4
UDG_UG_f1TT_f2CAT	12853	39393	39393	0	CGCGAGCTCTTUCATCTCGCGGGAACGCGAGATGGAAGAGCTCGCGACACTCTTTCCCTTTTTTTTTT	41807.4
UDG_UG_f1AA_f2AGA	18928	53569	57285	0	CGCGAGCTCAAUAGACTCGCGGGAACGCGAGTCTGTTGAGCTCGCGACACTCTTTCCCTTTTTTTTTT	61766.5
UDG_UG_f1TG_f2CCA	10850	29888	29888	0	CGCGAGCTCTGUCCACTCGCGGGAACGCGAGTGGGCAGAGCTCGCGACACTCTTTCCCTTTTTTTTTT	32589.4
UDG_UG_f1AC_f2GCC	9240	28373	28373	0	CGCGAGCTCACUGCCCTCGCGGGAACGCGAGGGCGGTGAGCTCGCGACACTCTTTCCCTTTTTTTTTT	31011.2
UDG_UG_f1CT_f2CCC	11206	32386	32386	0	CGCGAGCTCCTUCCCCTCGCGGGAACGCGAGGGGGAGGAGCTCGCGACACTCTTTCCCTTTTTTTTTT	35596.3
UDG_UG_f1GT_f2GCT	11401	34071	34071	0	CGCGAGCTCGTUGCTCTCGCGGGAACGCGAGAGCGACGAGCTCGCGACACTCTTTCCCTTTTTTTTTT	38019.8
UDG_UG_f1TC_f2TGT	8849	27403	27403	0	CGCGAGCTCTCUTGTCTCGCGGGAACGCGAGACAGGAGAGCTCGCGACACTCTTTCCCTTTTTTTTTT	30921.7
UDG_UG_f1GA_f2ATT	28995	65535	87776	0	CGCGAGCTCGAUATTCTCGCGGGAACGCGAGAATGTCGAGCTCGCGACACTCTTTCCCTTTTTTTTTT	99655.3
UDG_MM_AG	9966	28827	28827	0	CGCGAGCTCACACTTACCGCGGGAACGCGGTAAGGGTGAGCTCGCGACACTCTTTCCCTTTTTTTTTT	32998.6
UDG_UG_f1CC_f2CCC	11615	33790	33790	0	CGCGAGCTCCCUCCCCTCGCGGGAACGCGAGGGGGGGGAGCTCGCGACACTCTTTCCCTTTTTTTTTT	38913.6
UDG_UG_f1CC_f2TAA	11107	32205	32205	0	CGCGAGCTCCCUTAACTCGCGGGAACGCGAGTTAGGGGAGCTCGCGACACTCTTTCCCTTTTTTTTTT	37550.4
UDG_UG_f1GA_f2GGA	14390	43438	43438	0	CGCGAGCTCGAUGGACTCGCGGGAACGCGAGTCCGTCGAGCTCGCGACACTCTTTCCCTTTTTTTTTT	51324.5
UDG_UG_f1CT_f2GAC	11254	31862	31862	0	CGCGAGCTCCTUGACCTCGCGGGAACGCGAGGTCGAGGAGCTCGCGACACTCTTTCCCTTTTTTTTTT	38247.7
UDG_UG_f1AA_f2ACT	18896	53159	57188	0	CGCGAGCTCAAUACTCTCGCGGGAACGCGAGAGTGTTGAGCTCGCGACACTCTTTCCCTTTTTTTTTT	68805.1
UDG_UG_f1CG_f2ATA	19543	55677	59147	0	CGCGAGCTCCGUATACTCGCGGGAACGCGAGTATGCGGAGCTCGCGACACTCTTTCCCTTTTTTTTTT	71714.8
UDG_UG_f1CC_f2CGA	9198	27178	27178	0	CGCGAGCTCCCUCGACTCGCGGGAACGCGAGTCGGGGGAGCTCGCGACACTCTTTCCCTTTTTTTTTT	33470.7
UDG_UG_f1GT_f2CGC	9764	29250	29250	0	CGCGAGCTCGTUCGCCTCGCGGGAACGCGAGGCGGACGAGCTCGCGACACTCTTTCCCTTTTTTTTTT	37146.7
UDG_UG_f1AA_f2GTG	18657	53068	56464	0	CGCGAGCTCAAUGTGCTCGCGGGAACGCGAGCACGTTGAGCTCGCGACACTCTTTCCCTTTTTTTTTT	74559.8
UDG_UG_f1GC_f2ATG	10922	31637	31637	0	CGCGAGCTCGCUATGCTCGCGGGAACGCGAGCATGGCGAGCTCGCGACACTCTTTCCCTTTTTTTTTT	43296.6
UDG_UG_f1TC_f2ACA	9805	29116	29116	0	CGCGAGCTCTCUACACTCGCGGGAACGCGAGTGTGGAGAGCTCGCGACACTCTTTCCCTTTTTTTTTT	41997
UDG_UG_f1CG_f2ACG	14500	41857	41857	0	CGCGAGCTCCGUACGCTCGCGGGAACGCGAGCGTGCGGAGCTCGCGACACTCTTTCCCTTTTTTTTTT	61521.1
UDG_UG_f1GT_f2TGC	7425	21110	21110	0	CGCGAGCTCGTUTGCCTCGCGGGAACGCGAGGCAGACGAGCTCGCGACACTCTTTCCCTTTTTTTTTT	32749.3
UDG_UG_f1CT_f2TTT	7248	21026	21026	0	CGCGAGCTCCTUTTTCTCGCGGGAACGCGAGAAAGAGGAGCTCGCGACACTCTTTCCCTTTTTTTTTT	35216
UDG_UG_f1CC_f2GAT	8078	24406	24406	0	CGCGAGCTCCCUGATCTCGCGGGAACGCGAGATCGGGGAGCTCGCGACACTCTTTCCCTTTTTTTTTT	42221
UDG_UG_f1TA_f2GAC	6381	18853	18853	0	CGCGAGCTCTAUGACCTCGCGGGAACGCGAGGTCGTAGAGCTCGCGACACTCTTTCCCTTTTTTTTTT	33840.6
UDG_UG_f1CG_f2CAG	6289	17721	17721	0	CGCGAGCTCCGUCAGCTCGCGGGAACGCGAGCTGGCGGAGCTCGCGACACTCTTTCCCTTTTTTTTTT	34658.8
UDG_UG_f1TG_f2TTA	7384	22143	22143	0	CGCGAGCTCTGUTTACTCGCGGGAACGCGAGTAAGCAGAGCTCGCGACACTCTTTCCCTTTTTTTTTT	43307.4
UDG_UG_f1AC_f2GAC	5071	14244	14244	0	CGCGAGCTCACUGACCTCGCGGGAACGCGAGGTCGGTGAGCTCGCGACACTCTTTCCCTTTTTTTTTT	27858.5
UDG_UG_f1AT_f2TAA	5108	14502	14502	0	CGCGAGCTCATUTAACTCGCGGGAACGCGAGTTAGATGAGCTCGCGACACTCTTTCCCTTTTTTTTTT	28363.1
UDG_UG_f1CT_f2AAC	6214	17565	17565	0	CGCGAGCTCCTUAACCTCGCGGGAACGCGAGGTTGAGGAGCTCGCGACACTCTTTCCCTTTTTTTTTT	34353.7
UDG_UG_f1AT_f2ATT	11928	33913	33913	0	CGCGAGCTCATUATTCTCGCGGGAACGCGAGAATGATGAGCTCGCGACACTCTTTCCCTTTTTTTTTT	66327.2
UDG_UG_f1AG_f2CTC	3195	8780	8780	0	CGCGAGCTCAGUCTCCTCGCGGGAACGCGAGGAGGCTGAGCTCGCGACACTCTTTCCCTTTTTTTTTT	17172
UDG_UG_f1TT_f2CGG	2911	8411	8411	0	CGCGAGCTCTTUCGGCTCGCGGGAACGCGAGCCGGAAGAGCTCGCGACACTCTTTCCCTTTTTTTTTT	16450.3
UDG_UG_f1GC_f2CCA	8444	23878	23878	0	CGCGAGCTCGCUCCACTCGCGGGAACGCGAGTGGGGCGAGCTCGCGACACTCTTTCCCTTTTTTTTTT	22375.6
UDG_UG_f1AA_f2CAA	12830	36686	36686	0	CGCGAGCTCAAUCAACTCGCGGGAACGCGAGTTGGTTGAGCTCGCGACACTCTTTCCCTTTTTTTTTT	34377.7
UDG_UG_f1TG_f2GCG	12594	37155	37155	0	CGCGAGCTCTGUGCGCTCGCGGGAACGCGAGCGCGCAGAGCTCGCGACACTCTTTCCCTTTTTTTTTT	34817.2
UDG_UG_f1CA_f2TGA	11031	31107	31107	0	CGCGAGCTCCAUTGACTCGCGGGAACGCGAGTCAGTGGAGCTCGCGACACTCTTTCCCTTTTTTTTTT	29149.7
UDG_UG_f1AA_f2TCC	13341	39672	39672	0	CGCGAGCTCAAUTCCCTCGCGGGAACGCGAGGGAGTTGAGCTCGCGACACTCTTTCCCTTTTTTTTTT	37175.8
UDG_UG_f1GT_f2ACT	15530	48584	48584	0	CGCGAGCTCGTUACTCTCGCGGGAACGCGAGAGTGACGAGCTCGCGACACTCTTTCCCTTTTTTTTTT	45527
UDG_UG_f1CT_f2GAC	13070	39490	39490	0	CGCGAGCTCCTUGACCTCGCGGGAACGCGAGGTCGAGGAGCTCGCGACACTCTTTCCCTTTTTTTTTT	37005.3
UDG_UG_f1AC_f2CGC	12343	38268	38268	0	CGCGAGCTCACUCGCCTCGCGGGAACGCGAGGCGGGTGAGCTCGCGACACTCTTTCCCTTTTTTTTTT	35860.1
UDG_UG_f1CA_f2TAG	12931	38992	38992	0	CGCGAGCTCCAUTAGCTCGCGGGAACGCGAGCTAGTGGAGCTCGCGACACTCTTTCCCTTTTTTTTTT	36312.4
UDG_UG_f1AG_f2GAT	14906	46447	46447	0	CGCGAGCTCAGUGATCTCGCGGGAACGCGAGATCGCTGAGCTCGCGACACTCTTTCCCTTTTTTTTTT	43255
UDG_UG_f1CA_f2TCA	11824	36091	36091	0	CGCGAGCTCCAUTCACTCGCGGGAACGCGAGTGAGTGGAGCTCGCGACACTCTTTCCCTTTTTTTTTT	33392.2
UDG_UG_f1CT_f2CGT	12203	38120	38120	0	CGCGAGCTCCTUCGTCTCGCGGGAACGCGAGACGGAGGAGCTCGCGACACTCTTTCCCTTTTTTTTTT	35269.5
UDG_UG_f1CT_f2CAA	14585	43664	43664	0	CGCGAGCTCCTUCAACTCGCGGGAACGCGAGTTGGAGGAGCTCGCGACACTCTTTCCCTTTTTTTTTT	40774.7
UDG_UG_f1GG_f2ATG	34004	65535	102947	0	CGCGAGCTCGGUATGCTCGCGGGAACGCGAGCATGCCGAGCTCGCGACACTCTTTCCCTTTTTTTTTT	96469.5
UDG_UG_f1CT_f2TGC	11132	34663	34663	0	CGCGAGCTCCTUTGCCTCGCGGGAACGCGAGGCAGAGGAGCTCGCGACACTCTTTCCCTTTTTTTTTT	32482.8
UDG_UG_f1CA_f2CGC	13203	40162	40162	0	CGCGAGCTCCAUCGCCTCGCGGGAACGCGAGGCGGTGGAGCTCGCGACACTCTTTCCCTTTTTTTTTT	37842.1
UDG_Ulinker	10432	30830	30830	0	CGCGAGCTCGGCTATCTCGCGGGAACGCGAGATAGCCGAGCTCGCGAUACTCTTTCCCTTTTTTTTTT	29016
UDG_UG_f1CG_f2GCG	16244	48268	48268	0	CGCGAGCTCCGUGCGCTCGCGGGAACGCGAGCGCGCGGAGCTCGCGACACTCTTTCCCTTTTTTTTTT	45309.8
UDG_UG_f1AA_f2CCA	12485	38896	38896	0	CGCGAGCTCAAUCCACTCGCGGGAACGCGAGTGGGTTGAGCTCGCGACACTCTTTCCCTTTTTTTTTT	36125.1
UDG_UG_f1AG_f2CCT	12289	37964	37964	0	CGCGAGCTCAGUCCTCTCGCGGGAACGCGAGAGGGCTGAGCTCGCGACACTCTTTCCCTTTTTTTTTT	34396.2
UDG_UG_f1TA_f2GGA	13590	39428	39428	0	CGCGAGCTCTAUGGACTCGCGGGAACGCGAGTCCGTAGAGCTCGCGACACTCTTTCCCTTTTTTTTTT	35697.4
UDG_UG_f1AA_f2AAG	23235	64072	70330	0	CGCGAGCTCAAUAAGCTCGCGGGAACGCGAGCTTGTTGAGCTCGCGACACTCTTTCCCTTTTTTTTTT	63624.3
UDG_UG_f1AC_f2GTA	15618	49832	49832	0	CGCGAGCTCACUGTACTCGCGGGAACGCGAGTACGGTGAGCTCGCGACACTCTTTCCCTTTTTTTTTT	44538.4
UDG_UG_f1CT_f2GGA	14527	44428	44428	0	CGCGAGCTCCTUGGACTCGCGGGAACGCGAGTCCGAGGAGCTCGCGACACTCTTTCCCTTTTTTTTTT	40227.2
UDG_UG_f1AT_f2GAA	15580	46514	46514	0	CGCGAGCTCATUGAACTCGCGGGAACGCGAGTTCGATGAGCTCGCGACACTCTTTCCCTTTTTTTTTT	42266.4
UDG_UG_f1GG_f2AAT	27873	65535	84377	0	CGCGAGCTCGGUAATCTCGCGGGAACGCGAGATTGCCGAGCTCGCGACACTCTTTCCCTTTTTTTTTT	76963.5
UDG_UG_f1TA_f2TTG	14231	43768	43768	0	CGCGAGCTCTAUTTGCTCGCGGGAACGCGAGCAAGTAGAGCTCGCGACACTCTTTCCCTTTTTTTTTT	39922.5
UDG_UG_f1CC_f2AAC	14186	43807	43807	0	CGCGAGCTCCCUAACCTCGCGGGAACGCGAGGTTGGGGAGCTCGCGACACTCTTTCCCTTTTTTTTTT	39980.6
UDG_UG_f1GC_f2CCT	9983	30709	30709	0	CGCGAGCTCGCUCCTCTCGCGGGAACGCGAGAGGGGCGAGCTCGCGACACTCTTTCCCTTTTTTTTTT	28301.3
UDG_UG_f1TT_f2ACA	18199	55429	55077	0	CGCGAGCTCTTUACACTCGCGGGAACGCGAGTGTGAAGAGCTCGCGACACTCTTTCCCTTTTTTTTTT	50906.6
UDG_UG_f1GA_f2GTG	19412	57699	58750	0	CGCGAGCTCGAUGTGCTCGCGGGAACGCGAGCACGTCGAGCTCGCGACACTCTTTCCCTTTTTTTTTT	54143.8
UDG_random_6b_10	11018	33173	33173	0	CGCGAGCTCTGGGGCCTCGCGGGAACGCGAGGCCCCAGAGCTCGCGACACTCTTTCCCTTTTTTTTTT	30784.4
UDG_UG_f1TA_f2AAG	16470	52529	49840	0	CGCGAGCTCTAUAAGCTCGCGGGAACGCGAGCTTGTAGAGCTCGCGACACTCTTTCCCTTTTTTTTTT	46312.7
UDG_UG_f1AC_f2TTG	12855	39465	39465	0	CGCGAGCTCACUTTGCTCGCGGGAACGCGAGCAAGGTGAGCTCGCGACACTCTTTCCCTTTTTTTTTT	37117.6
UDG_UG_f1CT_f2AAT	21030	64127	63651	0	CGCGAGCTCCTUAATCTCGCGGGAACGCGAGATTGAGGAGCTCGCGACACTCTTTCCCTTTTTTTTTT	60414.1
UDG_UG_f1CG_f2GCG	16492	49597	49597	0	CGCGAGCTCCGUGCGCTCGCGGGAACGCGAGCGCGCGGAGCTCGCGACACTCTTTCCCTTTTTTTTTT	47661.7
UDG_UG_f1TC_f2ATG	14865	45859	45859	0	CGCGAGCTCTCUATGCTCGCGGGAACGCGAGCATGGAGAGCTCGCGACACTCTTTCCCTTTTTTTTTT	44225.1
UDG_UG_f1TA_f2AGT	14281	44438	44438	0	CGCGAGCTCTAUAGTCTCGCGGGAACGCGAGACTGTAGAGCTCGCGACACTCTTTCCCTTTTTTTTTT	43472
UDG_UG_f1CC_f2GCA	9949	29424	29424	0	CGCGAGCTCCCUGCACTCGCGGGAACGCGAGTGCGGGGAGCTCGCGACACTCTTTCCCTTTTTTTTTT	29035.2
UDG_UG_f1CG_f2TAA	12738	38651	38651	0	CGCGAGCTCCGUTAACTCGCGGGAACGCGAGTTAGCGGAGCTCGCGACACTCTTTCCCTTTTTTTTTT	38272.4
UDG_UG_f1TC_f2CTG	12204	37020	37020	0	CGCGAGCTCTCUCTGCTCGCGGGAACGCGAGCAGGGAGAGCTCGCGACACTCTTTCCCTTTTTTTTTT	37009.5
UDG_UG_random_2U	15200	45752	45752	0	CGCGUCTACUCTTTATGCGCGGGAACGCGCATAAAGGGTAGGCGCGACACTCTTTCCCTTTTTTTTTT	46568.7
UDG_UG_f1GC_f2CCA	9229	26666	26666	0	CGCGAGCTCGCUCCACTCGCGGGAACGCGAGTGGGGCGAGCTCGCGACACTCTTTCCCTTTTTTTTTT	27499.1
UDG_UG_f1AG_f2TAA	14301	41934	41934	0	CGCGAGCTCAGUTAACTCGCGGGAACGCGAGTTAGCTGAGCTCGCGACACTCTTTCCCTTTTTTTTTT	44148.5
UDG_UG_f1AA_f2AAT	20275	57753	61364	0	CGCGAGCTCAAUAATCTCGCGGGAACGCGAGATTGTTGAGCTCGCGACACTCTTTCCCTTTTTTTTTT	66164.7
UDG_UG_f1TA_f2CAG	12358	37422	37422	0	CGCGAGCTCTAUCAGCTCGCGGGAACGCGAGCTGGTAGAGCTCGCGACACTCTTTCCCTTTTTTTTTT	40447.1
UDG_UG_f1AA_f2ATT	28850	65535	87336	0	CGCGAGCTCAAUATTCTCGCGGGAACGCGAGAATGTTGAGCTCGCGACACTCTTTCCCTTTTTTTTTT	95507.4
UDG_UG_f1CT_f2TTA	11530	34765	34765	0	CGCGAGCTCCTUTTACTCGCGGGAACGCGAGTAAGAGGAGCTCGCGACACTCTTTCCCTTTTTTTTTT	38266.6
UDG_UG_f1CC_f2ACG	10245	31069	31069	0	CGCGAGCTCCCUACGCTCGCGGGAACGCGAGCGTGGGGAGCTCGCGACACTCTTTCCCTTTTTTTTTT	34645.9
UDG_UG_f1TT_f2GAC	8294	24494	24494	0	CGCGAGCTCTTUGACCTCGCGGGAACGCGAGGTCGAAGAGCTCGCGACACTCTTTCCCTTTTTTTTTT	27666.1
UDG_UG_f1TA_f2GCT	11410	32417	32417	0	CGCGAGCTCTAUGCTCTCGCGGGAACGCGAGAGCGTAGAGCTCGCGACACTCTTTCCCTTTTTTTTTT	36850.4
UDG_UG_f1TT_f2GCG	15297	43367	43367	0	CGCGAGCTCTTUGCGCTCGCGGGAACGCGAGCGCGAAGAGCTCGCGACACTCTTTCCCTTTTTTTTTT	49865.5
UDG_UG_f1AC_f2CCA	9039	27159	27159	0	CGCGAGCTCACUCCACTCGCGGGAACGCGAGTGGGGTGAGCTCGCGACACTCTTTCCCTTTTTTTTTT	31590.5
UDG_UG_f1CT_f2CTA	14998	45203	45203	0	CGCGAGCTCCTUCTACTCGCGGGAACGCGAGTAGGAGGAGCTCGCGACACTCTTTCCCTTTTTTTTTT	53250.7
UDG_UG_f1CG_f2ACC	16408	48355	48355	0	CGCGAGCTCCGUACCCTCGCGGGAACGCGAGGGTGCGGAGCTCGCGACACTCTTTCCCTTTTTTTTTT	57877.8
UDG_UG_f1CT_f2CGC	9643	28239	28239	0	CGCGAGCTCCTUCGCCTCGCGGGAACGCGAGGCGGAGGAGCTCGCGACACTCTTTCCCTTTTTTTTTT	33934.8
UDG_UG_f1TG_f2GCT	10388	29986	29986	0	CGCGAGCTCTGUGCTCTCGCGGGAACGCGAGAGCGCAGAGCTCGCGACACTCTTTCCCTTTTTTTTTT	36167.5
UDG_UG_f1AC_f2GGC	7462	22181	22181	0	CGCGAGCTCACUGGCCTCGCGGGAACGCGAGGCCGGTGAGCTCGCGACACTCTTTCCCTTTTTTTTTT	27271.5
UDG_UG_f1TA_f2TAG	8541	26292	26292	0	CGCGAGCTCTAUTAGCTCGCGGGAACGCGAGCTAGTAGAGCTCGCGACACTCTTTCCCTTTTTTTTTT	33381
UDG_UG_f1TT_f2CAT	7984	24080	24080	0	CGCGAGCTCTTUCATCTCGCGGGAACGCGAGATGGAAGAGCTCGCGACACTCTTTCCCTTTTTTTTTT	31832.3
UDG_UG_f1AC_f2AGG	7461	22020	22020	0	CGCGAGCTCACUAGGCTCGCGGGAACGCGAGCCTGGTGAGCTCGCGACACTCTTTCCCTTTTTTTTTT	30099.9
UDG_UG_f1TT_f2GGC	10069	30573	30573	0	CGCGAGCTCTTUGGCCTCGCGGGAACGCGAGGCCGAAGAGCTCGCGACACTCTTTCCCTTTTTTTTTT	43955.2
UDG_UG_f1AT_f2AGC	10529	31057	31057	0	CGCGAGCTCATUAGCCTCGCGGGAACGCGAGGCTGATGAGCTCGCGACACTCTTTCCCTTTTTTTTTT	45647.4
UDG_UG_f1GG_f2TTT	9208	27178	27178	0	CGCGAGCTCGGUTTTCTCGCGGGAACGCGAGAAAGCCGAGCTCGCGACACTCTTTCCCTTTTTTTTTT	41615.5
UDG_UG_f1CA_f2GGG	7285	21166	21166	0	CGCGAGCTCCAUGGGCTCGCGGGAACGCGAGCCCGTGGAGCTCGCGACACTCTTTCCCTTTTTTTTTT	34739.5
UDG_random_6b_2	6107	18166	18166	0	CGCGAGCTCCCTGTTCTCGCGGGAACGCGAGAACAGGGAGCTCGCGACACTCTTTCCCTTTTTTTTTT	30821.9
UDG_UG_f1TC_f2TTT	6052	17863	17863	0	CGCGAGCTCTCUTTTCTCGCGGGAACGCGAGAAAGGAGAGCTCGCGACACTCTTTCCCTTTTTTTTTT	31866.5
UDG_UG_f1TC_f2TAC	5809	17060	17060	0	CGCGAGCTCTCUTACCTCGCGGGAACGCGAGGTAGGAGAGCTCGCGACACTCTTTCCCTTTTTTTTTT	32770.8
UDG_UG_f1CA_f2TTG	7010	20697	20697	0	CGCGAGCTCCAUTTGCTCGCGGGAACGCGAGCAAGTGGAGCTCGCGACACTCTTTCCCTTTTTTTTTT	39757.2
UDG_UG_f1AC_f2CAT	4414	12693	12693	0	CGCGAGCTCACUCATCTCGCGGGAACGCGAGATGGGTGAGCTCGCGACACTCTTTCCCTTTTTTTTTT	24382.2
UDG_UG_f1CT_f2CTT	7003	20258	20258	0	CGCGAGCTCCTUCTTCTCGCGGGAACGCGAGAAGGAGGAGCTCGCGACACTCTTTCCCTTTTTTTTTT	38913.9
UDG_UG_f1TT_f2AAC	6524	19114	19114	0	CGCGAGCTCTTUAACCTCGCGGGAACGCGAGGTTGAAGAGCTCGCGACACTCTTTCCCTTTTTTTTTT	36716.4
UDG_UG_f1CA_f2GAT	3804	10975	10975	0	CGCGAGCTCCAUGATCTCGCGGGAACGCGAGATCGTGGAGCTCGCGACACTCTTTCCCTTTTTTTTTT	21082
UDG_UG_f1TT_f2ATT	9736	27478	27478	0	CGCGAGCTCTTUATTCTCGCGGGAACGCGAGAATGAAGAGCTCGCGACACTCTTTCCCTTTTTTTTTT	52782.9
UDG_UG_f1GC_f2TAC	2207	6247	6247	0	CGCGAGCTCGCUTACCTCGCGGGAACGCGAGGTAGGCGAGCTCGCGACACTCTTTCCCTTTTTTTTTT	12000
UDG_UG_f1TG_f2TAC	11099	33992	33992	0	CGCGAGCTCTGUTACCTCGCGGGAACGCGAGGTAGCAGAGCTCGCGACACTCTTTCCCTTTTTTTTTT	31831.5
UDG_UG_f1CG_f2ACG	21736	63865	65789	0	CGCGAGCTCCGUACGCTCGCGGGAACGCGAGCGTGCGGAGCTCGCGACACTCTTTCCCTTTTTTTTTT	61607.5
UDG_UG_f1TC_f2AAG	10238	31791	31791	0	CGCGAGCTCTCUAAGCTCGCGGGAACGCGAGCTTGGAGAGCTCGCGACACTCTTTCCCTTTTTTTTTT	29770.4
UDG_UG_f1GT_f2GCT	10603	33493	33493	0	CGCGAGCTCGTUGCTCTCGCGGGAACGCGAGAGCGACGAGCTCGCGACACTCTTTCCCTTTTTTTTTT	31364.2
UDG_UG_f1AT_f2TTA	13363	41457	41457	0	CGCGAGCTCATUTTACTCGCGGGAACGCGAGTAAGATGAGCTCGCGACACTCTTTCCCTTTTTTTTTT	38822
UDG_UG_f1CG_f2TAC	12585	39783	39783	0	CGCGAGCTCCGUTACCTCGCGGGAACGCGAGGTAGCGGAGCTCGCGACACTCTTTCCCTTTTTTTTTT	37254.4
UDG_UG_f1AT_f2ATG	32276	65535	97713	0	CGCGAGCTCATUATGCTCGCGGGAACGCGAGCATGATGAGCTCGCGACACTCTTTCCCTTTTTTTTTT	91502.5
UDG_UG_f1AA_f2GCT	13725	46512	46512	0	CGCGAGCTCAAUGCTCTCGCGGGAACGCGAGAGCGTTGAGCTCGCGACACTCTTTCCCTTTTTTTTTT	43555.8
UDG_UG_f1AG_f2GCT	13769	44715	44715	0	CGCGAGCTCAGUGCTCTCGCGGGAACGCGAGAGCGCTGAGCTCGCGACACTCTTTCCCTTTTTTTTTT	41756.1
UDG_UG_f1TA_f2ACG	13710	46739	46739	0	CGCGAGCTCTAUACGCTCGCGGGAACGCGAGCGTGTAGAGCTCGCGACACTCTTTCCCTTTTTTTTTT	43527
UDG_UG_f1AA_f2CGG	13137	42941	42941	0	CGCGAGCTCAAUCGGCTCGCGGGAACGCGAGCCGGTTGAGCTCGCGACACTCTTTCCCTTTTTTTTTT	39846.1
UDG_UG_f1TT_f2GGG	12274	37959	37959	0	CGCGAGCTCTTUGGGCTCGCGGGAACGCGAGCCCGAAGAGCTCGCGACACTCTTTCCCTTTTTTTTTT	35120.6
UDG_UG_f1GT_f2GAA	12058	38664	38664	0	CGCGAGCTCGTUGAACTCGCGGGAACGCGAGTTCGACGAGCTCGCGACACTCTTTCCCTTTTTTTTTT	36232.1
UDG_UG_f1CA_f2CGA	10744	35714	35714	0	CGCGAGCTCCAUCGACTCGCGGGAACGCGAGTCGGTGGAGCTCGCGACACTCTTTCCCTTTTTTTTTT	33493.9
UDG_UG_f1CC_f2GGG	8207	25976	25976	0	CGCGAGCTCCCUGGGCTCGCGGGAACGCGAGCCCGGGGAGCTCGCGACACTCTTTCCCTTTTTTTTTT	24384
UDG_random_6b_7	8722	27715	27715	0	CGCGAGCTCCCGGAACTCGCGGGAACGCGAGTTCCGGGAGCTCGCGACACTCTTTCCCTTTTTTTTTT	26219.2
UDG_UG_f1AT_f2CGG	13562	44769	44769	0	CGCGAGCTCATUCGGCTCGCGGGAACGCGAGCCGGATGAGCTCGCGACACTCTTTCCCTTTTTTTTTT	42352.7
UDG_UG_f1TT_f2GTA	17108	58448	51772	0	CGCGAGCTCTTUGTACTCGCGGGAACGCGAGTACGAAGAGCTCGCGACACTCTTTCCCTTTTTTTTTT	48977.7
UDG_UG_f1CC_f2AAT	16703	56456	50545	0	CGCGAGCTCCCUAATCTCGCGGGAACGCGAGATTGGGGAGCTCGCGACACTCTTTCCCTTTTTTTTTT	47355.1
UDG_UG_f1TT_f2AGT	16525	52802	50006	0	CGCGAGCTCTTUAGTCTCGCGGGAACGCGAGACTGAAGAGCTCGCGACACTCTTTCCCTTTTTTTTTT	45525.2
UDG_random_6b_10	13740	42252	42252	0	CGCGAGCTCTGGGGCCTCGCGGGAACGCGAGGCCCCAGAGCTCGCGACACTCTTTCCCTTTTTTTTTT	38254.2
UDG_UG_f1CT_f2CTA	18903	61896	57209	0	CGCGAGCTCCTUCTACTCGCGGGAACGCGAGTAGGAGGAGCTCGCGACACTCTTTCCCTTTTTTTTTT	51754.3
UDG_UG_f1GT_f2TAC	13034	43132	43132	0	CGCGAGCTCGTUTACCTCGCGGGAACGCGAGGTAGACGAGCTCGCGACACTCTTTCCCTTTTTTTTTT	38830.4
UDG_UG_f1CT_f2CGG	13536	43405	43405	0	CGCGAGCTCCTUCGGCTCGCGGGAACGCGAGCCGGAGGAGCTCGCGACACTCTTTCCCTTTTTTTTTT	39228.3
UDG_UG_f1GC_f2ATG	14545	47337	47337	0	CGCGAGCTCGCUATGCTCGCGGGAACGCGAGCATGGCGAGCTCGCGACACTCTTTCCCTTTTTTTTTT	43014.2
UDG_UG_f1TA_f2GGA	10583	34859	34859	0	CGCGAGCTCTAUGGACTCGCGGGAACGCGAGTCCGTAGAGCTCGCGACACTCTTTCCCTTTTTTTTTT	31675.7
UDG_UG_f1TG_f2ACA	19858	63944	60101	0	CGCGAGCTCTGUACACTCGCGGGAACGCGAGTGTGCAGAGCTCGCGACACTCTTTCCCTTTTTTTTTT	54626
UDG_UG_f1TG_f2GCT	13630	42854	42854	0	CGCGAGCTCTGUGCTCTCGCGGGAACGCGAGAGCGCAGAGCTCGCGACACTCTTTCCCTTTTTTTTTT	38940.6
UDG_UG_f1TT_f2ATT	31391	65535	95033	0	CGCGAGCTCTTUATTCTCGCGGGAACGCGAGAATGAAGAGCTCGCGACACTCTTTCCCTTTTTTTTTT	86732.3
UDG_UG_f1AG_f2CCA	10726	34161	34161	0	CGCGAGCTCAGUCCACTCGCGGGAACGCGAGTGGGCTGAGCTCGCGACACTCTTTCCCTTTTTTTTTT	31482.7
UDG_UG_f1TG_f2TTA	13548	44919	44919	0	CGCGAGCTCTGUTTACTCGCGGGAACGCGAGTAAGCAGAGCTCGCGACACTCTTTCCCTTTTTTTTTT	41351.1
UDG_UG_f1GG_f2CTT	13956	44536	44536	0	CGCGAGCTCGGUCTTCTCGCGGGAACGCGAGAAGGCCGAGCTCGCGACACTCTTTCCCTTTTTTTTTT	41205.8
UDG_UG_f1CT_f2CCA	12186	40874	40874	0	CGCGAGCTCCTUCCACTCGCGGGAACGCGAGTGGGAGGAGCTCGCGACACTCTTTCCCTTTTTTTTTT	37817.6
UDG_UG_f1TT_f2GTG	18450	61063	55837	0	CGCGAGCTCTTUGTGCTCGCGGGAACGCGAGCACGAAGAGCTCGCGACACTCTTTCCCTTTTTTTTTT	52395.1
UDG_UG_f1CG_f2TGG	12214	38102	38102	0	CGCGAGCTCCGUTGGCTCGCGGGAACGCGAGCCAGCGGAGCTCGCGACACTCTTTCCCTTTTTTTTTT	35867.4
UDG_UG_f1AT_f2TAG	12146	36298	36298	0	CGCGAGCTCATUTAGCTCGCGGGAACGCGAGCTAGATGAGCTCGCGACACTCTTTCCCTTTTTTTTTT	34501.4
UDG_UG_f1TC_f2AGC	10535	34256	34256	0	CGCGAGCTCTCUAGCCTCGCGGGAACGCGAGGCTGGAGAGCTCGCGACACTCTTTCCCTTTTTTTTTT	32819.1
UDG_UG_f1AC_f2GAA	10677	34364	34364	0	CGCGAGCTCACUGAACTCGCGGGAACGCGAGTTCGGTGAGCTCGCGACACTCTTTCCCTTTTTTTTTT	33433
UDG_UG_f1GT_f2GAA	13613	43128	43128	0	CGCGAGCTCGTUGAACTCGCGGGAACGCGAGTTCGACGAGCTCGCGACACTCTTTCCCTTTTTTTTTT	42266.2
UDG_UG_f1GA_f2GCA	12742	40560	40560	0	CGCGAGCTCGAUGCACTCGCGGGAACGCGAGTGCGTCGAGCTCGCGACACTCTTTCCCTTTTTTTTTT	39914.8
UDG_UG_f1TA_f2TTT	10993	33877	33877	0	CGCGAGCTCTAUTTTCTCGCGGGAACGCGAGAAAGTAGAGCTCGCGACACTCTTTCCCTTTTTTTTTT	33631.2
UDG_UG_f1GT_f2TCG	10725	32328	32328	0	CGCGAGCTCGTUTCGCTCGCGGGAACGCGAGCGAGACGAGCTCGCGACACTCTTTCCCTTTTTTTTTT	32462.1
UDG_UG_f1CC_f2ATG	13934	44731	44731	0	CGCGAGCTCCCUATGCTCGCGGGAACGCGAGCATGGGGAGCTCGCGACACTCTTTCCCTTTTTTTTTT	45687.2
UDG_UG_f1GC_f2CAC	12280	37518	37518	0	CGCGAGCTCGCUCACCTCGCGGGAACGCGAGGTGGGCGAGCTCGCGACACTCTTTCCCTTTTTTTTTT	39127.9
UDG_UG_f1GT_f2ACC	12464	38582	38582	0	CGCGAGCTCGTUACCCTCGCGGGAACGCGAGGGTGACGAGCTCGCGACACTCTTTCCCTTTTTTTTTT	40862.7
UDG_UG_f1AC_f2GCT	9963	30277	30277	0	CGCGAGCTCACUGCTCTCGCGGGAACGCGAGAGCGGTGAGCTCGCGACACTCTTTCCCTTTTTTTTTT	32247.9
UDG_UG_f1TT_f2CTA	16815	54526	50885	0	CGCGAGCTCTTUCTACTCGCGGGAACGCGAGTAGGAAGAGCTCGCGACACTCTTTCCCTTTTTTTTTT	55076.9
UDG_UG_f1AA_f2AAA	19864	59490	60119	0	CGCGAGCTCAAUAAACTCGCGGGAACGCGAGTTTGTTGAGCTCGCGACACTCTTTCCCTTTTTTTTTT	65823.3
UDG_UG_f1TC_f2AAG	9969	32439	32439	0	CGCGAGCTCTCUAAGCTCGCGGGAACGCGAGCTTGGAGAGCTCGCGACACTCTTTCCCTTTTTTTTTT	35785.9
UDG_UG_f1AC_f2TAC	9177	29310	29310	0	CGCGAGCTCACUTACCTCGCGGGAACGCGAGGTAGGTGAGCTCGCGACACTCTTTCCCTTTTTTTTTT	32803.6
UDG_UG_f1AT_f2TTT	11137	35488	35488	0	CGCGAGCTCATUTTTCTCGCGGGAACGCGAGAAAGATGAGCTCGCGACACTCTTTCCCTTTTTTTTTT	40177.9
UDG_UG_f1TG_f2GCT	10260	32256	32256	0	CGCGAGCTCTGUGCTCTCGCGGGAACGCGAGAGCGCAGAGCTCGCGACACTCTTTCCCTTTTTTTTTT	36923.8
UDG_UG_f1AG_f2CTC	10341	31536	31536	0	CGCGAGCTCAGUCTCCTCGCGGGAACGCGAGGAGGCTGAGCTCGCGACACTCTTTCCCTTTTTTTTTT	36321.2
UDG_UG_f1TC_f2AAC	12229	38353	38353	0	CGCGAGCTCTCUAACCTCGCGGGAACGCGAGGTTGGAGAGCTCGCGACACTCTTTCCCTTTTTTTTTT	44817.3
UDG_UG_f1AA_f2TGG	10896	34430	34430	0	CGCGAGCTCAAUTGGCTCGCGGGAACGCGAGCCAGTTGAGCTCGCGACACTCTTTCCCTTTTTTTTTT	40978.1
UDG_UG_f1CA_f2CCC	9360	29237	29237	0	CGCGAGCTCCAUCCCCTCGCGGGAACGCGAGGGGGTGGAGCTCGCGACACTCTTTCCCTTTTTTTTTT	34973.4
UDG_UG_f1GT_f2CCC	9888	30076	30076	0	CGCGAGCTCGTUCCCCTCGCGGGAACGCGAGGGGGACGAGCTCGCGACACTCTTTCCCTTTTTTTTTT	36103.7
UDG_UG_f1TG_f2TCC	9007	27210	27210	0	CGCGAGCTCTGUTCCCTCGCGGGAACGCGAGGGAGCAGAGCTCGCGACACTCTTTCCCTTTTTTTTTT	33180.1
UDG_UG_f1CT_f2ATC	14397	45074	45074	0	CGCGAGCTCCTUATCCTCGCGGGAACGCGAGGATGAGGAGCTCGCGACACTCTTTCCCTTTTTTTTTT	56396.4
UDG_UG_f1GC_f2TAA	7921	24986	24986	0	CGCGAGCTCGCUTAACTCGCGGGAACGCGAGTTAGGCGAGCTCGCGACACTCTTTCCCTTTTTTTTTT	32608.8
UDG_UG_f1TG_f2CAG	7362	22523	22523	0	CGCGAGCTCTGUCAGCTCGCGGGAACGCGAGCTGGCAGAGCTCGCGACACTCTTTCCCTTTTTTTTTT	30697.1
UDG_UG_f1CA_f2GCG	8584	26324	26324	0	CGCGAGCTCCAUGCGCTCGCGGGAACGCGAGCGCGTGGAGCTCGCGACACTCTTTCCCTTTTTTTTTT	37209.9
UDG_UG_f1TA_f2TCC	6945	21806	21806	0	CGCGAGCTCTAUTCCCTCGCGGGAACGCGAGGGAGTAGAGCTCGCGACACTCTTTCCCTTTTTTTTTT	31917.7
UDG_UG_f1AC_f2ATG	8266	25148	25148	0	CGCGAGCTCACUATGCTCGCGGGAACGCGAGCATGGTGAGCTCGCGACACTCTTTCCCTTTTTTTTTT	38225.1
UDG_UG_f1AT_f2GAT	7377	22500	22500	0	CGCGAGCTCATUGATCTCGCGGGAACGCGAGATCGATGAGCTCGCGACACTCTTTCCCTTTTTTTTTT	35981.5
UDG_UG_f1GC_f2TAT	5789	17504	17504	0	CGCGAGCTCGCUTATCTCGCGGGAACGCGAGATAGGCGAGCTCGCGACACTCTTTCCCTTTTTTTTTT	29416.6
UDG_UG_f1TC_f2TGT	4342	13287	13287	0	CGCGAGCTCTCUTGTCTCGCGGGAACGCGAGACAGGAGAGCTCGCGACACTCTTTCCCTTTTTTTTTT	23383.2
UDG_UG_f1CC_f2CTA	5088	15466	15466	0	CGCGAGCTCCCUCTACTCGCGGGAACGCGAGTAGGGGGAGCTCGCGACACTCTTTCCCTTTTTTTTTT	28987.9
UDG_UG_f1TC_f2CGG	4411	13386	13386	0	CGCGAGCTCTCUCGGCTCGCGGGAACGCGAGCCGGGAGAGCTCGCGACACTCTTTCCCTTTTTTTTTT	25089.4
UDG_UG_f1AG_f2CCG	4596	14030	14030	0	CGCGAGCTCAGUCCGCTCGCGGGAACGCGAGCGGGCTGAGCTCGCGACACTCTTTCCCTTTTTTTTTT	26296.4
UDG_UG_f1CG_f2GCA	5829	17309	17309	0	CGCGAGCTCCGUGCACTCGCGGGAACGCGAGTGCGCGGAGCTCGCGACACTCTTTCCCTTTTTTTTTT	32442.3
UDG_UG_f1TC_f2GTA	3359	9892	9892	0	CGCGAGCTCTCUGTACTCGCGGGAACGCGAGTACGGAGAGCTCGCGACACTCTTTCCCTTTTTTTTTT	18540.6
UDG_random_6b_4	2751	8193	8193	0	CGCGAGCTCTCACGCCTCGCGGGAACGCGAGGCGTGAGAGCTCGCGACACTCTTTCCCTTTTTTTTTT	15356.1
UDG_UG_f1TT_f2CGT	2914	8488	8488	0	CGCGAGCTCTTUCGTCTCGCGGGAACGCGAGACGGAAGAGCTCGCGACACTCTTTCCCTTTTTTTTTT	15909.1
UDG_UG_f1AC_f2TTC	2267	6601	6601	0	CGCGAGCTCACUTTCCTCGCGGGAACGCGAGGAAGGTGAGCTCGCGACACTCTTTCCCTTTTTTTTTT	12372.3
UDG_UG_f1AA_f2TTG	16848	51607	50985	0	CGCGAGCTCAAUTTGCTCGCGGGAACGCGAGCAAGTTGAGCTCGCGACACTCTTTCCCTTTTTTTTTT	46842.4
UDG_UG_f1CA_f2GCT	12050	36980	36980	0	CGCGAGCTCCAUGCTCTCGCGGGAACGCGAGAGCGTGGAGCTCGCGACACTCTTTCCCTTTTTTTTTT	33975.3
UDG_UG_f1AA_f2CCC	11082	34940	34940	0	CGCGAGCTCAAUCCCCTCGCGGGAACGCGAGGGGGTTGAGCTCGCGACACTCTTTCCCTTTTTTTTTT	32101.1
UDG_UG_f1CA_f2GCA	11851	36636	36636	0	CGCGAGCTCCAUGCACTCGCGGGAACGCGAGTGCGTGGAGCTCGCGACACTCTTTCCCTTTTTTTTTT	33659.3
UDG_UG_f1CA_f2CAA	11979	38333	38333	0	CGCGAGCTCCAUCAACTCGCGGGAACGCGAGTTGGTGGAGCTCGCGACACTCTTTCCCTTTTTTTTTT	35218.4
UDG_UG_f1CC_f2ATC	14344	45661	45661	0	CGCGAGCTCCCUATCCTCGCGGGAACGCGAGGATGGGGAGCTCGCGACACTCTTTCCCTTTTTTTTTT	41951
UDG_UG_f1GG_f2GTA	18536	60475	56097	0	CGCGAGCTCGGUGTACTCGCGGGAACGCGAGTACGCCGAGCTCGCGACACTCTTTCCCTTTTTTTTTT	51539
UDG_UG_f1GA_f2TAT	14488	48164	48164	0	CGCGAGCTCGAUTATCTCGCGGGAACGCGAGATAGTCGAGCTCGCGACACTCTTTCCCTTTTTTTTTT	44250.6
UDG_UG_f1CG_f2GTT	15420	49297	49297	0	CGCGAGCTCCGUGTTCTCGCGGGAACGCGAGAACGCGGAGCTCGCGACACTCTTTCCCTTTTTTTTTT	45110.8
UDG_UG_f1TC_f2GCT	10622	36504	36504	0	CGCGAGCTCTCUGCTCTCGCGGGAACGCGAGAGCGGAGAGCTCGCGACACTCTTTCCCTTTTTTTTTT	33324.5
UDG_UG_f1GC_f2AAC	13302	41016	41016	0	CGCGAGCTCGCUAACCTCGCGGGAACGCGAGGTTGGCGAGCTCGCGACACTCTTTCCCTTTTTTTTTT	37342.6
UDG_UG_f1TT_f2CGA	11520	36860	36860	0	CGCGAGCTCTTUCGACTCGCGGGAACGCGAGTCGGAAGAGCTCGCGACACTCTTTCCCTTTTTTTTTT	33558.8
UDG_UG_f1CC_f2CTA	10123	31380	31380	0	CGCGAGCTCCCUCTACTCGCGGGAACGCGAGTAGGGGGAGCTCGCGACACTCTTTCCCTTTTTTTTTT	29027
UDG_UG_f1CG_f2CCA	10775	34848	34848	0	CGCGAGCTCCGUCCACTCGCGGGAACGCGAGTGGGCGGAGCTCGCGACACTCTTTCCCTTTTTTTTTT	32242.2
UDG_UG_f1CA_f2TCA	10702	33802	33802	0	CGCGAGCTCCAUTCACTCGCGGGAACGCGAGTGAGTGGAGCTCGCGACACTCTTTCCCTTTTTTTTTT	31394
UDG_UG_f1CA_f2ACG	14556	46168	46168	0	CGCGAGCTCCAUACGCTCGCGGGAACGCGAGCGTGTGGAGCTCGCGACACTCTTTCCCTTTTTTTTTT	43264.2
UDG_UG_f1GA_f2GCG	11857	38628	38628	0	CGCGAGCTCGAUGCGCTCGCGGGAACGCGAGCGCGTCGAGCTCGCGACACTCTTTCCCTTTTTTTTTT	36198.4
UDG_UG_f1AT_f2CAA	13159	45338	45338	0	CGCGAGCTCATUCAACTCGCGGGAACGCGAGTTGGATGAGCTCGCGACACTCTTTCCCTTTTTTTTTT	42486.4
UDG_random_6b_6	9011	28949	28949	0	CGCGAGCTCCTACGACTCGCGGGAACGCGAGTCGTAGGAGCTCGCGACACTCTTTCCCTTTTTTTTTT	26778.3
UDG_UG_f1CG_f2GTC	16302	51858	49331	0	CGCGAGCTCCGUGTCCTCGCGGGAACGCGAGGACGCGGAGCTCGCGACACTCTTTCCCTTTTTTTTTT	44663.4
UDG_UG_f1TG_f2GAG	13881	47440	47440	0	CGCGAGCTCTGUGAGCTCGCGGGAACGCGAGCTCGCAGAGCTCGCGACACTCTTTCCCTTTTTTTTTT	42400.5
UDG_MM_GG	10515	35409	35409	0	CGCGAGCTCACGCTTACCGCGGGAACGCGGTAAGGGTGAGCTCGCGACACTCTTTCCCTTTTTTTTTT	31647.5
UDG_UG_f1AC_f2CCG	11412	36755	36755	0	CGCGAGCTCACUCCGCTCGCGGGAACGCGAGCGGGGTGAGCTCGCGACACTCTTTCCCTTTTTTTTTT	32705
UDG_UG_f1GT_f2ATG	29606	65535	89626	0	CGCGAGCTCGTUATGCTCGCGGGAACGCGAGCATGACGAGCTCGCGACACTCTTTCCCTTTTTTTTTT	80105.2
UDG_UG_f1AT_f2GAA	13412	43345	43345	0	CGCGAGCTCATUGAACTCGCGGGAACGCGAGTTCGATGAGCTCGCGACACTCTTTCCCTTTTTTTTTT	39023.1
UDG_UG_f1GA_f2CGC	14084	43163	43163	0	CGCGAGCTCGAUCGCCTCGCGGGAACGCGAGGCGGTCGAGCTCGCGACACTCTTTCCCTTTTTTTTTT	38858.3
UDG_UG_f1TC_f2GTT	11933	39203	39203	0	CGCGAGCTCTCUGTTCTCGCGGGAACGCGAGAACGGAGAGCTCGCGACACTCTTTCCCTTTTTTTTTT	35465.1
UDG_UG_f1AG_f2GAC	12289	36981	36981	0	CGCGAGCTCAGUGACCTCGCGGGAACGCGAGGTCGCTGAGCTCGCGACACTCTTTCCCTTTTTTTTTT	33455
UDG_UG_f1TC_f2GAG	10392	33105	33105	0	CGCGAGCTCTCUGAGCTCGCGGGAACGCGAGCTCGGAGAGCTCGCGACACTCTTTCCCTTTTTTTTTT	30089.2
UDG_UG_f1GT_f2TAG	12202	39980	39980	0	CGCGAGCTCGTUTAGCTCGCGGGAACGCGAGCTAGACGAGCTCGCGACACTCTTTCCCTTTTTTTTTT	36467.3
UDG_UG_f1CG_f2TGG	12694	40706	40706	0	CGCGAGCTCCGUTGGCTCGCGGGAACGCGAGCCAGCGGAGCTCGCGACACTCTTTCCCTTTTTTTTTT	37129.5
UDG_UG_f1GG_f2TGC	12335	39591	39591	0	CGCGAGCTCGGUTGCCTCGCGGGAACGCGAGGCAGCCGAGCTCGCGACACTCTTTCCCTTTTTTTTTT	36487
UDG_UG_f1TG_f2TGT	14037	47643	47643	0	CGCGAGCTCTGUTGTCTCGCGGGAACGCGAGACAGCAGAGCTCGCGACACTCTTTCCCTTTTTTTTTT	43907.6
UDG_UG_f1TT_f2TAG	12921	44049	44049	0	CGCGAGCTCTTUTAGCTCGCGGGAACGCGAGCTAGAAGAGCTCGCGACACTCTTTCCCTTTTTTTTTT	40755.2
UDG_UG_f1TG_f2AAA	45864	65535	138868	0	CGCGAGCTCTGUAAACTCGCGGGAACGCGAGTTTGCAGAGCTCGCGACACTCTTTCCCTTTTTTTTTT	128863
UDG_UG_f1TG_f2AAC	35415	65535	107220	0	CGCGAGCTCTGUAACCTCGCGGGAACGCGAGGTTGCAGAGCTCGCGACACTCTTTCCCTTTTTTTTTT	100611
UDG_UG_f1GT_f2TTG	15145	49207	49207	0	CGCGAGCTCGTUTTGCTCGCGGGAACGCGAGCAAGACGAGCTCGCGACACTCTTTCCCTTTTTTTTTT	46173.7
UDG_UG_f1AA_f2GCG	16198	50760	49016	0	CGCGAGCTCAAUGCGCTCGCGGGAACGCGAGCGCGTTGAGCTCGCGACACTCTTTCCCTTTTTTTTTT	46833.2
UDG_UG_f1GT_f2TAA	12790	39387	39387	0	CGCGAGCTCGTUTAACTCGCGGGAACGCGAGTTAGACGAGCTCGCGACACTCTTTCCCTTTTTTTTTT	38298.9
UDG_UG_f1TT_f2GCA	16078	49852	49852	0	CGCGAGCTCTTUGCACTCGCGGGAACGCGAGTGCGAAGAGCTCGCGACACTCTTTCCCTTTTTTTTTT	48607.1
UDG_UG_f1CT_f2AGC	13110	41057	41057	0	CGCGAGCTCCTUAGCCTCGCGGGAACGCGAGGCTGAGGAGCTCGCGACACTCTTTCCCTTTTTTTTTT	40236.6
UDG_UG_f1AT_f2TTG	13406	40817	40817	0	CGCGAGCTCATUTTGCTCGCGGGAACGCGAGCAAGATGAGCTCGCGACACTCTTTCCCTTTTTTTTTT	40749.5
UDG_UG_f1GA_f2CCC	10884	33800	33800	0	CGCGAGCTCGAUCCCCTCGCGGGAACGCGAGGGGGTCGAGCTCGCGACACTCTTTCCCTTTTTTTTTT	34047.9
UDG_UG_f1TC_f2GGA	12197	37648	37648	0	CGCGAGCTCTCUGGACTCGCGGGAACGCGAGTCCGGAGAGCTCGCGACACTCTTTCCCTTTTTTTTTT	38452.8
UDG_UG_f1GA_f2CCG	12366	38936	38936	0	CGCGAGCTCGAUCCGCTCGCGGGAACGCGAGCGGGTCGAGCTCGCGACACTCTTTCCCTTTTTTTTTT	40092.3
UDG_UG_f1TG_f2TGC	10152	32259	32259	0	CGCGAGCTCTGUTGCCTCGCGGGAACGCGAGGCAGCAGAGCTCGCGACACTCTTTCCCTTTTTTTTTT	33266.8
UDG_UG_f1TC_f2GGC	10982	32923	32923	0	CGCGAGCTCTCUGGCCTCGCGGGAACGCGAGGCCGGAGAGCTCGCGACACTCTTTCCCTTTTTTTTTT	35066.1
UDG_UG_f1AT_f2CTA	15026	47511	47511	0	CGCGAGCTCATUCTACTCGCGGGAACGCGAGTAGGATGAGCTCGCGACACTCTTTCCCTTTTTTTTTT	51351.6
UDG_random_6b_2	8834	27771	27771	0	CGCGAGCTCCCTGTTCTCGCGGGAACGCGAGAACAGGGAGCTCGCGACACTCTTTCCCTTTTTTTTTT	30406
UDG_UG_f1AC_f2AAA	12084	37663	37663	0	CGCGAGCTCACUAAACTCGCGGGAACGCGAGTTTGGTGAGCTCGCGACACTCTTTCCCTTTTTTTTTT	41888.4
UDG_UG_f1GT_f2ATA	18202	57901	55086	0	CGCGAGCTCGTUATACTCGCGGGAACGCGAGTATGACGAGCTCGCGACACTCTTTCCCTTTTTTTTTT	62114.1
UDG_UG_f1CT_f2TCG	6722	21319	21319	0	CGCGAGCTCCTUTCGCTCGCGGGAACGCGAGCGAGAGGAGCTCGCGACACTCTTTCCCTTTTTTTTTT	24234.6
UDG_UG_f1GT_f2GTT	13059	40537	40537	0	CGCGAGCTCGTUGTTCTCGCGGGAACGCGAGAACGACGAGCTCGCGACACTCTTTCCCTTTTTTTTTT	46456.2
UDG_UG_f1AG_f2TGC	10711	32900	32900	0	CGCGAGCTCAGUTGCCTCGCGGGAACGCGAGGCAGCTGAGCTCGCGACACTCTTTCCCTTTTTTTTTT	37857
UDG_UG_f1CC_f2CCG	9160	28755	28755	0	CGCGAGCTCCCUCCGCTCGCGGGAACGCGAGCGGGGGGAGCTCGCGACACTCTTTCCCTTTTTTTTTT	33527.8
UDG_UG_f1CA_f2AGC	9919	30640	30640	0	CGCGAGCTCCAUAGCCTCGCGGGAACGCGAGGCTGTGGAGCTCGCGACACTCTTTCCCTTTTTTTTTT	35979.7
UDG_UG_f1GG_f2TTG	9347	29120	29120	0	CGCGAGCTCGGUTTGCTCGCGGGAACGCGAGCAAGCCGAGCTCGCGACACTCTTTCCCTTTTTTTTTT	34304.4
UDG_UG_f1AG_f2CGC	9012	27921	27921	0	CGCGAGCTCAGUCGCCTCGCGGGAACGCGAGGCGGCTGAGCTCGCGACACTCTTTCCCTTTTTTTTTT	33516.8
UDG_UG_f1AA_f2GAA	11528	35310	35310	0	CGCGAGCTCAAUGAACTCGCGGGAACGCGAGTTCGTTGAGCTCGCGACACTCTTTCCCTTTTTTTTTT	43394.9
UDG_UG_f1TC_f2GGG	8251	25445	25445	0	CGCGAGCTCTCUGGGCTCGCGGGAACGCGAGCCCGGAGAGCTCGCGACACTCTTTCCCTTTTTTTTTT	32317.8
UDG_UG_f1CA_f2GAT	8693	27343	27343	0	CGCGAGCTCCAUGATCTCGCGGGAACGCGAGATCGTGGAGCTCGCGACACTCTTTCCCTTTTTTTTTT	36145.8
UDG_UG_f1AT_f2GTA	11096	34725	34725	0	CGCGAGCTCATUGTACTCGCGGGAACGCGAGTACGATGAGCTCGCGACACTCTTTCCCTTTTTTTTTT	47491.2
UDG_UG_f1TG_f2GAT	8286	25840	25840	0	CGCGAGCTCTGUGATCTCGCGGGAACGCGAGATCGCAGAGCTCGCGACACTCTTTCCCTTTTTTTTTT	37509
UDG_UG_f1TT_f2CCT	7066	21896	21896	0	CGCGAGCTCTTUCCTCTCGCGGGAACGCGAGAGGGAAGAGCTCGCGACACTCTTTCCCTTTTTTTTTT	32575.7
UDG_UG_f1CA_f2CAG	5568	16943	16943	0	CGCGAGCTCCAUCAGCTCGCGGGAACGCGAGCTGGTGGAGCTCGCGACACTCTTTCCCTTTTTTTTTT	26584.5
UDG_UG_f1CT_f2TAC	5303	16064	16064	0	CGCGAGCTCCTUTACCTCGCGGGAACGCGAGGTAGAGGAGCTCGCGACACTCTTTCCCTTTTTTTTTT	26666
UDG_MM_TG	4091	12281	12281	0	CGCGAGCTCACTCTTACCGCGGGAACGCGGTAAGGGTGAGCTCGCGACACTCTTTCCCTTTTTTTTTT	21354.8
UDG_UG_f1GA_f2TAG	4643	14229	14229	0	CGCGAGCTCGAUTAGCTCGCGGGAACGCGAGCTAGTCGAGCTCGCGACACTCTTTCCCTTTTTTTTTT	26303.2
UDG_UG_f1AA_f2GCA	6162	18707	18707	0	CGCGAGCTCAAUGCACTCGCGGGAACGCGAGTGCGTTGAGCTCGCGACACTCTTTCCCTTTTTTTTTT	34581
UDG_UG_f1TT_f2CTT	5966	18570	18570	0	CGCGAGCTCTTUCTTCTCGCGGGAACGCGAGAAGGAAGAGCTCGCGACACTCTTTCCCTTTTTTTTTT	34327.7
UDG_UG_f1AC_f2GCC	3857	11669	11669	0	CGCGAGCTCACUGCCCTCGCGGGAACGCGAGGGCGGTGAGCTCGCGACACTCTTTCCCTTTTTTTTTT	21570.8
UDG_UG_f1CT_f2ACA	4544	13644	13644	0	CGCGAGCTCCTUACACTCGCGGGAACGCGAGTGTGAGGAGCTCGCGACACTCTTTCCCTTTTTTTTTT	25221.7
UDG_UG_f1GT_f2CTT	4014	12243	12243	0	CGCGAGCTCGTUCTTCTCGCGGGAACGCGAGAAGGACGAGCTCGCGACACTCTTTCCCTTTTTTTTTT	22631.9
UDG_UG_f1TA_f2GAA	2705	7864	7864	0	CGCGAGCTCTAUGAACTCGCGGGAACGCGAGTTCGTAGAGCTCGCGACACTCTTTCCCTTTTTTTTTT	14537.1
UDG_UG_f1TA_f2TAC	2160	6286	6286	0	CGCGAGCTCTAUTACCTCGCGGGAACGCGAGGTAGTAGAGCTCGCGACACTCTTTCCCTTTTTTTTTT	11620
UDG_UG_f1GA_f2TTA	17295	54365	52338	0	CGCGAGCTCGAUTTACTCGCGGGAACGCGAGTAAGTCGAGCTCGCGACACTCTTTCCCTTTTTTTTTT	47893.6
UDG_UG_f1GT_f2AAA	19320	59912	58472	0	CGCGAGCTCGTUAAACTCGCGGGAACGCGAGTTTGACGAGCTCGCGACACTCTTTCCCTTTTTTTTTT	53506.7
UDG_UG_f1AA_f2GGC	14302	44843	44843	0	CGCGAGCTCAAUGGCCTCGCGGGAACGCGAGGCCGTTGAGCTCGCGACACTCTTTCCCTTTTTTTTTT	41035
UDG_UG_f1AG_f2TGT	11360	36321	36321	0	CGCGAGCTCAGUTGTCTCGCGGGAACGCGAGACAGCTGAGCTCGCGACACTCTTTCCCTTTTTTTTTT	33236.7
UDG_UG_f1TT_f2AAT	20049	63905	60680	0	CGCGAGCTCTTUAATCTCGCGGGAACGCGAGATTGAAGAGCTCGCGACACTCTTTCCCTTTTTTTTTT	55527.2
UDG_UG_f1AA_f2TTA	17553	57209	53120	0	CGCGAGCTCAAUTTACTCGCGGGAACGCGAGTAAGTTGAGCTCGCGACACTCTTTCCCTTTTTTTTTT	48609.2
UDG_UG_f1GA_f2ATT	32155	65535	97347	0	CGCGAGCTCGAUATTCTCGCGGGAACGCGAGAATGTCGAGCTCGCGACACTCTTTCCCTTTTTTTTTT	89080.5
UDG_UG_f1AT_f2TCG	12567	41453	41453	0	CGCGAGCTCATUTCGCTCGCGGGAACGCGAGCGAGATGAGCTCGCGACACTCTTTCCCTTTTTTTTTT	37932.9
UDG_UG_f1CT_f2CCA	12416	38026	38026	0	CGCGAGCTCCTUCCACTCGCGGGAACGCGAGTGGGAGGAGCTCGCGACACTCTTTCCCTTTTTTTTTT	34620.4
UDG_UG_f1GC_f2CTA	10974	35982	35982	0	CGCGAGCTCGCUCTACTCGCGGGAACGCGAGTAGGGCGAGCTCGCGACACTCTTTCCCTTTTTTTTTT	32590.9
UDG_UG_f1AG_f2TTT	12031	39892	39892	0	CGCGAGCTCAGUTTTCTCGCGGGAACGCGAGAAAGCTGAGCTCGCGACACTCTTTCCCTTTTTTTTTT	36221.6
UDG_UG_f1TG_f2ATG	24135	65535	73056	0	CGCGAGCTCTGUATGCTCGCGGGAACGCGAGCATGCAGAGCTCGCGACACTCTTTCCCTTTTTTTTTT	66170.9
UDG_UG_random_5U	11147	36243	36243	0	CGCGCGAGUUAACUUUGCGCGGGAACGCGCGGGGTTGGCTCGCGCGACACTCTTTCCCTTTTTTTTTT	32997.1
UDG_UG_f1CT_f2TAG	10886	35435	35435	0	CGCGAGCTCCTUTAGCTCGCGGGAACGCGAGCTAGAGGAGCTCGCGACACTCTTTCCCTTTTTTTTTT	32425.9
UDG_UG_f1GG_f2TCA	11887	37434	37434	0	CGCGAGCTCGGUTCACTCGCGGGAACGCGAGTGAGCCGAGCTCGCGACACTCTTTCCCTTTTTTTTTT	34627.1
UDG_UG_f1CC_f2CAC	11279	35451	35451	0	CGCGAGCTCCCUCACCTCGCGGGAACGCGAGGTGGGGGAGCTCGCGACACTCTTTCCCTTTTTTTTTT	33014.7
UDG_MM_CA	11108	36468	36468	0	CGCGAGCTCACCCTTACCGCGGGAACGCGGTAAGAGTGAGCTCGCGACACTCTTTCCCTTTTTTTTTT	33961.8
UDG_UG_f1CG_f2CGC	12346	39270	39270	0	CGCGAGCTCCGUCGCCTCGCGGGAACGCGAGGCGGCGGAGCTCGCGACACTCTTTCCCTTTTTTTTTT	36791.7
UDG_UG_f1TC_f2TCC	10477	33622	33622	0	CGCGAGCTCTCUTCCCTCGCGGGAACGCGAGGGAGGAGAGCTCGCGACACTCTTTCCCTTTTTTTTTT	30951.4
UDG_UG_f1TT_f2TTA	15916	52531	48162	0	CGCGAGCTCTTUTTACTCGCGGGAACGCGAGTAAGAAGAGCTCGCGACACTCTTTCCCTTTTTTTTTT	42346.9
UDG_UG_f1GA_f2CCG	11956	39207	39207	0	CGCGAGCTCGAUCCGCTCGCGGGAACGCGAGCGGGTCGAGCTCGCGACACTCTTTCCCTTTTTTTTTT	34390.9
UDG_UG_f1TA_f2GAG	10957	35862	35862	0	CGCGAGCTCTAUGAGCTCGCGGGAACGCGAGCTCGTAGAGCTCGCGACACTCTTTCCCTTTTTTTTTT	31501.5
UDG_UG_f1TT_f2TCA	11026	33390	33390	0	CGCGAGCTCTTUTCACTCGCGGGAACGCGAGTGAGAAGAGCTCGCGACACTCTTTCCCTTTTTTTTTT	29293.3
UDG_UG_f1GA_f2CCC	10187	33160	33160	0	CGCGAGCTCGAUCCCCTCGCGGGAACGCGAGGGGGTCGAGCTCGCGACACTCTTTCCCTTTTTTTTTT	29156.3
UDG_UG_f1CA_f2CAC	14276	46116	46116	0	CGCGAGCTCCAUCACCTCGCGGGAACGCGAGGTGGTGGAGCTCGCGACACTCTTTCCCTTTTTTTTTT	41287.7
UDG_UG_f1CG_f2TGC	14747	40356	40356	0	CGCGAGCTCCGUTGCCTCGCGGGAACGCGAGGCAGCGGAGCTCGCGACACTCTTTCCCTTTTTTTTTT	36069
UDG_UG_f1TA_f2CGA	16168	50710	48925	0	CGCGAGCTCTAUCGACTCGCGGGAACGCGAGTCGGTAGAGCTCGCGACACTCTTTCCCTTTTTTTTTT	44045.7
UDG_UG_f1TA_f2AGT	15012	45698	45698	0	CGCGAGCTCTAUAGTCTCGCGGGAACGCGAGACTGTAGAGCTCGCGACACTCTTTCCCTTTTTTTTTT	41140.5
UDG_UG_f1AA_f2CCT	11683	34947	34947	0	CGCGAGCTCAAUCCTCTCGCGGGAACGCGAGAGGGTTGAGCTCGCGACACTCTTTCCCTTTTTTTTTT	31642.7
UDG_UG_f1AC_f2AGA	11073	34150	34150	0	CGCGAGCTCACUAGACTCGCGGGAACGCGAGTCTGGTGAGCTCGCGACACTCTTTCCCTTTTTTTTTT	31031.4
UDG_UG_f1AG_f2GCG	12611	38523	38523	0	CGCGAGCTCAGUGCGCTCGCGGGAACGCGAGCGCGCTGAGCTCGCGACACTCTTTCCCTTTTTTTTTT	34969.2
UDG_UG_random_6U	7970	25577	25577	0	CGCGUCUCUUTUACUCCCGCGGGAACGCGGGGGTGAGGGGGGCGCGACACTCTTTCCCTTTTTTTTTT	23257.8
UDG_UG_f1TC_f2TGC	9902	32431	32431	0	CGCGAGCTCTCUTGCCTCGCGGGAACGCGAGGCAGGAGAGCTCGCGACACTCTTTCCCTTTTTTTTTT	29544.6
UDG_UG_f1CA_f2CCC	8887	27920	27920	0	CGCGAGCTCCAUCCCCTCGCGGGAACGCGAGGGGGTGGAGCTCGCGACACTCTTTCCCTTTTTTTTTT	25573
UDG_UG_f1AC_f2GGA	9712	30543	30543	0	CGCGAGCTCACUGGACTCGCGGGAACGCGAGTCCGGTGAGCTCGCGACACTCTTTCCCTTTTTTTTTT	27986.6
UDG_UG_f1CG_f2ACT	32645	65535	98831	0	CGCGAGCTCCGUACTCTCGCGGGAACGCGAGAGTGCGGAGCTCGCGACACTCTTTCCCTTTTTTTTTT	91728.6
UDG_UG_f1AT_f2AAC	21998	65535	66583	0	CGCGAGCTCATUAACCTCGCGGGAACGCGAGGTTGATGAGCTCGCGACACTCTTTCCCTTTTTTTTTT	61785.7
UDG_UG_f1GT_f2CAC	14430	45962	45962	0	CGCGAGCTCGTUCACCTCGCGGGAACGCGAGGTGGACGAGCTCGCGACACTCTTTCCCTTTTTTTTTT	43345.6
UDG_UG_f1TC_f2GAA	11523	36499	36499	0	CGCGAGCTCTCUGAACTCGCGGGAACGCGAGTTCGGAGAGCTCGCGACACTCTTTCCCTTTTTTTTTT	34825.3
UDG_UG_f1CG_f2ACT	27275	65535	82566	0	CGCGAGCTCCGUACTCTCGCGGGAACGCGAGAGTGCGGAGCTCGCGACACTCTTTCCCTTTTTTTTTT	79119.1
UDG_UG_f1AA_f2AGG	16742	51105	50664	0	CGCGAGCTCAAUAGGCTCGCGGGAACGCGAGCCTGTTGAGCTCGCGACACTCTTTCCCTTTTTTTTTT	49074.2
UDG_UG_f1AA_f2TCT	14018	42574	42574	0	CGCGAGCTCAAUTCTCTCGCGGGAACGCGAGAGAGTTGAGCTCGCGACACTCTTTCCCTTTTTTTTTT	41510.8
UDG_UG_f1GG_f2TGG	13769	42549	42549	0	CGCGAGCTCGGUTGGCTCGCGGGAACGCGAGCCAGCCGAGCTCGCGACACTCTTTCCCTTTTTTTTTT	42387.6
UDG_UG_f1TT_f2TAC	13319	41871	41871	0	CGCGAGCTCTTUTACCTCGCGGGAACGCGAGGTAGAAGAGCTCGCGACACTCTTTCCCTTTTTTTTTT	42178.1
UDG_UG_f1GG_f2CGG	11702	36773	36773	0	CGCGAGCTCGGUCGGCTCGCGGGAACGCGAGCCGGCCGAGCTCGCGACACTCTTTCCCTTTTTTTTTT	37429.4
UDG_UG_f1AA_f2AGA	14499	44846	44846	0	CGCGAGCTCAAUAGACTCGCGGGAACGCGAGTCTGTTGAGCTCGCGACACTCTTTCCCTTTTTTTTTT	45874
UDG_UG_f1AC_f2CGA	9968	30797	30797	0	CGCGAGCTCACUCGACTCGCGGGAACGCGAGTCGGGTGAGCTCGCGACACTCTTTCCCTTTTTTTTTT	32471.2
UDG_UG_f1TA_f2TGC	9361	29426	29426	0	CGCGAGCTCTAUTGCCTCGCGGGAACGCGAGGCAGTAGAGCTCGCGACACTCTTTCCCTTTTTTTTTT	31447.9
UDG_UG_f1CG_f2GCG	14143	43146	43146	0	CGCGAGCTCCGUGCGCTCGCGGGAACGCGAGCGCGCGGAGCTCGCGACACTCTTTCCCTTTTTTTTTT	47045.7
UDG_UG_f1GA_f2CTC	10486	32238	32238	0	CGCGAGCTCGAUCTCCTCGCGGGAACGCGAGGAGGTCGAGCTCGCGACACTCTTTCCCTTTTTTTTTT	35589.5
UDG_UG_f1GC_f2TGT	9384	28622	28622	0	CGCGAGCTCGCUTGTCTCGCGGGAACGCGAGACAGGCGAGCTCGCGACACTCTTTCCCTTTTTTTTTT	32033.5
UDG_UG_f1AT_f2TAT	9138	28651	28651	0	CGCGAGCTCATUTATCTCGCGGGAACGCGAGATAGATGAGCTCGCGACACTCTTTCCCTTTTTTTTTT	32528.5
UDG_UG_f1TA_f2CGA	10038	31792	31792	0	CGCGAGCTCTAUCGACTCGCGGGAACGCGAGTCGGTAGAGCTCGCGACACTCTTTCCCTTTTTTTTTT	36353.5
UDG_UG_f1AC_f2ATA	10579	32489	32489	0	CGCGAGCTCACUATACTCGCGGGAACGCGAGTATGGTGAGCTCGCGACACTCTTTCCCTTTTTTTTTT	37233
UDG_UG_f1AG_f2GCC	10641	32413	32413	0	CGCGAGCTCAGUGCCCTCGCGGGAACGCGAGGGCGCTGAGCTCGCGACACTCTTTCCCTTTTTTTTTT	37695.9
UDG_UG_f1GA_f2TAA	8611	26546	26546	0	CGCGAGCTCGAUTAACTCGCGGGAACGCGAGTTAGTCGAGCTCGCGACACTCTTTCCCTTTTTTTTTT	31020.3
UDG_UG_f1CA_f2GGC	9357	29580	29580	0	CGCGAGCTCCAUGGCCTCGCGGGAACGCGAGGCCGTGGAGCTCGCGACACTCTTTCCCTTTTTTTTTT	34678
UDG_UG_f1CT_f2CAA	8612	25454	25454	0	CGCGAGCTCCTUCAACTCGCGGGAACGCGAGTTGGAGGAGCTCGCGACACTCTTTCCCTTTTTTTTTT	30261.1
UDG_UG_f1GA_f2CAT	9524	29692	29692	0	CGCGAGCTCGAUCATCTCGCGGGAACGCGAGATGGTCGAGCTCGCGACACTCTTTCCCTTTTTTTTTT	35797.8
UDG_UG_f1TA_f2GAG	7297	22467	22467	0	CGCGAGCTCTAUGAGCTCGCGGGAACGCGAGCTCGTAGAGCTCGCGACACTCTTTCCCTTTTTTTTTT	28110.6
UDG_UG_f1AG_f2ACA	11958	38478	38478	0	CGCGAGCTCAGUACACTCGCGGGAACGCGAGTGTGCTGAGCTCGCGACACTCTTTCCCTTTTTTTTTT	49999.2
UDG_UG_f1GC_f2CGT	8378	24606	24606	0	CGCGAGCTCGCUCGTCTCGCGGGAACGCGAGACGGGCGAGCTCGCGACACTCTTTCCCTTTTTTTTTT	33598.9
UDG_UG_f1AT_f2GTC	11456	34701	34701	0	CGCGAGCTCATUGTCCTCGCGGGAACGCGAGGACGATGAGCTCGCGACACTCTTTCCCTTTTTTTTTT	49364.7
UDG_UG_f1CG_f2GAT	8385	25510	25510	0	CGCGAGCTCCGUGATCTCGCGGGAACGCGAGATCGCGGAGCTCGCGACACTCTTTCCCTTTTTTTTTT	37685.3
UDG_UG_f1AG_f2AGG	9959	29687	29687	0	CGCGAGCTCAGUAGGCTCGCGGGAACGCGAGCCTGCTGAGCTCGCGACACTCTTTCCCTTTTTTTTTT	45877.2
UDG_UG_f1TA_f2CTC	8717	27164	27164	0	CGCGAGCTCTAUCTCCTCGCGGGAACGCGAGGAGGTAGAGCTCGCGACACTCTTTCCCTTTTTTTTTT	44851.4
UDG_UG_f1AC_f2GGG	6985	22037	22037	0	CGCGAGCTCACUGGGCTCGCGGGAACGCGAGCCCGGTGAGCTCGCGACACTCTTTCCCTTTTTTTTTT	38268.9
UDG_UG_f1TG_f2ATA	12368	38350	38350	0	CGCGAGCTCTGUATACTCGCGGGAACGCGAGTATGCAGAGCTCGCGACACTCTTTCCCTTTTTTTTTT	70328.8
UDG_UG_f1GG_f2TCG	7079	21646	21646	0	CGCGAGCTCGGUTCGCTCGCGGGAACGCGAGCGAGCCGAGCTCGCGACACTCTTTCCCTTTTTTTTTT	39695.9
UDG_UG_f1TG_f2ACG	9223	28485	28485	0	CGCGAGCTCTGUACGCTCGCGGGAACGCGAGCGTGCAGAGCTCGCGACACTCTTTCCCTTTTTTTTTT	52237.7
UDG_UG_f1CG_f2AGC	8771	26947	26947	0	CGCGAGCTCCGUAGCCTCGCGGGAACGCGAGGCTGCGGAGCTCGCGACACTCTTTCCCTTTTTTTTTT	49417.2
UDG_UG_f1TG_f2ACG	6780	20825	20825	0	CGCGAGCTCTGUACGCTCGCGGGAACGCGAGCGTGCAGAGCTCGCGACACTCTTTCCCTTTTTTTTTT	38190.3
UDG_UG_f1GT_f2GGC	3241	9682	9682	0	CGCGAGCTCGTUGGCCTCGCGGGAACGCGAGGCCGACGAGCTCGCGACACTCTTTCCCTTTTTTTTTT	17755.5
UDG_UG_f1AG_f2CGA	2772	8144	8144	0	CGCGAGCTCAGUCGACTCGCGGGAACGCGAGTCGGCTGAGCTCGCGACACTCTTTCCCTTTTTTTTTT	14935
UDG_UG_f1TG_f2AGA	4387	13320	13320	0	CGCGAGCTCTGUAGACTCGCGGGAACGCGAGTCTGCAGAGCTCGCGACACTCTTTCCCTTTTTTTTTT	24427.1
UDG_UG_f1CA_f2ATC	25118	65535	76033	0	CGCGAGCTCCAUATCCTCGCGGGAACGCGAGGATGTGGAGCTCGCGACACTCTTTCCCTTTTTTTTTT	68369
UDG_UG_f1CT_f2AGG	14661	46929	46929	0	CGCGAGCTCCTUAGGCTCGCGGGAACGCGAGCCTGAGGAGCTCGCGACACTCTTTCCCTTTTTTTTTT	42198.6
UDG_UG_f1CG_f2TCG	11949	36435	36435	0	CGCGAGCTCCGUTCGCTCGCGGGAACGCGAGCGAGCGGAGCTCGCGACACTCTTTCCCTTTTTTTTTT	32762.4
UDG_UG_f1CA_f2CTC	13619	42517	42517	0	CGCGAGCTCCAUCTCCTCGCGGGAACGCGAGGAGGTGGAGCTCGCGACACTCTTTCCCTTTTTTTTTT	38231.3
UDG_UG_f1TC_f2ACC	12114	38164	38164	0	CGCGAGCTCTCUACCCTCGCGGGAACGCGAGGGTGGAGAGCTCGCGACACTCTTTCCCTTTTTTTTTT	34317.1
UDG_UG_f1CA_f2AGT	18004	56459	54486	0	CGCGAGCTCCAUAGTCTCGCGGGAACGCGAGACTGTGGAGCTCGCGACACTCTTTCCCTTTTTTTTTT	48993.9
UDG_UG_f1AA_f2GCT	16456	53324	49797	0	CGCGAGCTCAAUGCTCTCGCGGGAACGCGAGAGCGTTGAGCTCGCGACACTCTTTCCCTTTTTTTTTT	44777.5
UDG_UG_f1TA_f2CCC	11360	36755	36755	0	CGCGAGCTCTAUCCCCTCGCGGGAACGCGAGGGGGTAGAGCTCGCGACACTCTTTCCCTTTTTTTTTT	33050.1
UDG_UG_f1AG_f2GAG	11168	36940	36940	0	CGCGAGCTCAGUGAGCTCGCGGGAACGCGAGCTCGCTGAGCTCGCGACACTCTTTCCCTTTTTTTTTT	33102.7
UDG_UG_f1GA_f2CCG	10491	35004	35004	0	CGCGAGCTCGAUCCGCTCGCGGGAACGCGAGCGGGTCGAGCTCGCGACACTCTTTCCCTTTTTTTTTT	31169.3
UDG_UG_f1AC_f2CGA	8118	26285	26285	0	CGCGAGCTCACUCGACTCGCGGGAACGCGAGTCGGGTGAGCTCGCGACACTCTTTCCCTTTTTTTTTT	23405.5
UDG_UG_f1AC_f2GGG	8691	27753	27753	0	CGCGAGCTCACUGGGCTCGCGGGAACGCGAGCCCGGTGAGCTCGCGACACTCTTTCCCTTTTTTTTTT	24712.7
UDG_UG_f1CT_f2GAA	10223	33216	33216	0	CGCGAGCTCCTUGAACTCGCGGGAACGCGAGTTCGAGGAGCTCGCGACACTCTTTCCCTTTTTTTTTT	29577.2
UDG_UG_f1GA_f2ACC	14309	46336	46336	0	CGCGAGCTCGAUACCCTCGCGGGAACGCGAGGGTGTCGAGCTCGCGACACTCTTTCCCTTTTTTTTTT	40741.4
UDG_UG_f1GC_f2CGT	10124	30657	30657	0	CGCGAGCTCGCUCGTCTCGCGGGAACGCGAGACGGGCGAGCTCGCGACACTCTTTCCCTTTTTTTTTT	27698.9
UDG_UG_f1CG_f2AAC	35519	65535	107535	0	CGCGAGCTCCGUAACCTCGCGGGAACGCGAGGTTGCGGAGCTCGCGACACTCTTTCCCTTTTTTTTTT	97419.5
UDG_UG_f1GT_f2GGC	12152	39200	39200	0	CGCGAGCTCGTUGGCCTCGCGGGAACGCGAGGCCGACGAGCTCGCGACACTCTTTCCCTTTTTTTTTT	35512.6
UDG_UG_f1CA_f2TAC	11490	37504	37504	0	CGCGAGCTCCAUTACCTCGCGGGAACGCGAGGTAGTGGAGCTCGCGACACTCTTTCCCTTTTTTTTTT	34208.9
UDG_UG_f1AG_f2GGC	14534	43751	43751	0	CGCGAGCTCAGUGGCCTCGCGGGAACGCGAGGCCGCTGAGCTCGCGACACTCTTTCCCTTTTTTTTTT	39611.3
UDG_UG_f1TA_f2TAC	11109	36775	36775	0	CGCGAGCTCTAUTACCTCGCGGGAACGCGAGGTAGTAGAGCTCGCGACACTCTTTCCCTTTTTTTTTT	32061.6
UDG_UG_f1GT_f2ACG	16004	53288	48428	0	CGCGAGCTCGTUACGCTCGCGGGAACGCGAGCGTGACGAGCTCGCGACACTCTTTCCCTTTTTTTTTT	41883.9
UDG_UG_f1GT_f2ATC	25862	65535	78286	0	CGCGAGCTCGTUATCCTCGCGGGAACGCGAGGATGACGAGCTCGCGACACTCTTTCCCTTTTTTTTTT	68137.1
UDG_UG_f1AC_f2TAG	9765	32240	32240	0	CGCGAGCTCACUTAGCTCGCGGGAACGCGAGCTAGGTGAGCTCGCGACACTCTTTCCCTTTTTTTTTT	27949.1
UDG_UG_f1AT_f2AAC	19031	59577	57597	0	CGCGAGCTCATUAACCTCGCGGGAACGCGAGGTTGATGAGCTCGCGACACTCTTTCCCTTTTTTTTTT	50298.7
UDG_UG_f1CA_f2CTC	12337	37722	37722	0	CGCGAGCTCCAUCTCCTCGCGGGAACGCGAGGAGGTGGAGCTCGCGACACTCTTTCCCTTTTTTTTTT	33235.9
UDG_UG_f1AT_f2ACA	15354	50818	46460	0	CGCGAGCTCATUACACTCGCGGGAACGCGAGTGTGATGAGCTCGCGACACTCTTTCCCTTTTTTTTTT	40850.4
UDG_UG_f1TA_f2CTG	14472	46263	46263	0	CGCGAGCTCTAUCTGCTCGCGGGAACGCGAGCAGGTAGAGCTCGCGACACTCTTTCCCTTTTTTTTTT	40761.1
UDG_UG_f1CG_f2CTC	12939	41265	41265	0	CGCGAGCTCCGUCTCCTCGCGGGAACGCGAGGAGGCGGAGCTCGCGACACTCTTTCCCTTTTTTTTTT	36379.1
UDG_UG_f1TG_f2GTC	13643	44044	44044	0	CGCGAGCTCTGUGTCCTCGCGGGAACGCGAGGACGCAGAGCTCGCGACACTCTTTCCCTTTTTTTTTT	39649.5
UDG_UG_f1GA_f2CGA	12534	41632	41632	0	CGCGAGCTCGAUCGACTCGCGGGAACGCGAGTCGGTCGAGCTCGCGACACTCTTTCCCTTTTTTTTTT	37480
UDG_UG_f1AG_f2TTG	11992	37562	37562	0	CGCGAGCTCAGUTTGCTCGCGGGAACGCGAGCAAGCTGAGCTCGCGACACTCTTTCCCTTTTTTTTTT	33814.3
UDG_UG_f1GG_f2TGC	10849	34501	34501	0	CGCGAGCTCGGUTGCCTCGCGGGAACGCGAGGCAGCCGAGCTCGCGACACTCTTTCCCTTTTTTTTTT	31358.1
UDG_UG_f1TT_f2ACG	16515	55061	49976	0	CGCGAGCTCTTUACGCTCGCGGGAACGCGAGCGTGAAGAGCTCGCGACACTCTTTCCCTTTTTTTTTT	45610.8
UDG_UG_f1GG_f2GTA	17997	58765	54465	0	CGCGAGCTCGGUGTACTCGCGGGAACGCGAGTACGCCGAGCTCGCGACACTCTTTCCCTTTTTTTTTT	49886.6
UDG_UG_f1GC_f2GTT	13304	42140	42140	0	CGCGAGCTCGCUGTTCTCGCGGGAACGCGAGAACGGCGAGCTCGCGACACTCTTTCCCTTTTTTTTTT	38459.2
UDG_UG_f1TC_f2AGA	10908	33522	33522	0	CGCGAGCTCTCUAGACTCGCGGGAACGCGAGTCTGGAGAGCTCGCGACACTCTTTCCCTTTTTTTTTT	30893.8
UDG_UG_f1GG_f2ACA	21356	65230	64638	0	CGCGAGCTCGGUACACTCGCGGGAACGCGAGTGTGCCGAGCTCGCGACACTCTTTCCCTTTTTTTTTT	59227.9
UDG_UG_f1GT_f2AGT	18697	58629	56585	0	CGCGAGCTCGTUAGTCTCGCGGGAACGCGAGACTGACGAGCTCGCGACACTCTTTCCCTTTTTTTTTT	53096.9
UDG_UG_f1CG_f2CCG	12347	38073	38073	0	CGCGAGCTCCGUCCGCTCGCGGGAACGCGAGCGGGCGGAGCTCGCGACACTCTTTCCCTTTTTTTTTT	36136.8
UDG_UG_f1GT_f2CAT	12915	40780	40780	0	CGCGAGCTCGTUCATCTCGCGGGAACGCGAGATGGACGAGCTCGCGACACTCTTTCCCTTTTTTTTTT	38761.6
UDG_UG_f1AG_f2ACT	17566	55430	53159	0	CGCGAGCTCAGUACTCTCGCGGGAACGCGAGAGTGCTGAGCTCGCGACACTCTTTCCCTTTTTTTTTT	51057
UDG_UG_f1CG_f2GCT	14138	44435	44435	0	CGCGAGCTCCGUGCTCTCGCGGGAACGCGAGAGCGCGGAGCTCGCGACACTCTTTCCCTTTTTTTTTT	42888.6
UDG_UG_f1CC_f2TAA	11504	36373	36373	0	CGCGAGCTCCCUTAACTCGCGGGAACGCGAGTTAGGGGAGCTCGCGACACTCTTTCCCTTTTTTTTTT	35865.7
UDG_UG_f1TC_f2AAT	13537	43518	43518	0	CGCGAGCTCTCUAATCTCGCGGGAACGCGAGATTGGAGAGCTCGCGACACTCTTTCCCTTTTTTTTTT	43408.7
UDG_MM_TT	10625	33292	33292	0	CGCGAGCTCACTCTTACCGCGGGAACGCGGTAAGTGTGAGCTCGCGACACTCTTTCCCTTTTTTTTTT	33430.1
UDG_UG_f1AG_f2TAC	10813	32454	32454	0	CGCGAGCTCAGUTACCTCGCGGGAACGCGAGGTAGCTGAGCTCGCGACACTCTTTCCCTTTTTTTTTT	33147.7
UDG_UG_f1TG_f2GGG	11498	35005	35005	0	CGCGAGCTCTGUGGGCTCGCGGGAACGCGAGCCCGCAGAGCTCGCGACACTCTTTCCCTTTTTTTTTT	36644.9
UDG_UG_f1GC_f2AGG	10187	31939	31939	0	CGCGAGCTCGCUAGGCTCGCGGGAACGCGAGCCTGGCGAGCTCGCGACACTCTTTCCCTTTTTTTTTT	33827
UDG_UG_f1TT_f2AAT	14762	44964	44964	0	CGCGAGCTCTTUAATCTCGCGGGAACGCGAGATTGAAGAGCTCGCGACACTCTTTCCCTTTTTTTTTT	48598.7
UDG_UG_f1GC_f2AGG	10396	31147	31147	0	CGCGAGCTCGCUAGGCTCGCGGGAACGCGAGCCTGGCGAGCTCGCGACACTCTTTCCCTTTTTTTTTT	34360.6
UDG_UG_f1GT_f2CCA	10976	32632	32632	0	CGCGAGCTCGTUCCACTCGCGGGAACGCGAGTGGGACGAGCTCGCGACACTCTTTCCCTTTTTTTTTT	36414
UDG_UG_f1TT_f2GGC	10704	32719	32719	0	CGCGAGCTCTTUGGCCTCGCGGGAACGCGAGGCCGAAGAGCTCGCGACACTCTTTCCCTTTTTTTTTT	37068.9
UDG_UG_f1AA_f2AAC	16011	49350	49350	0	CGCGAGCTCAAUAACCTCGCGGGAACGCGAGGTTGTTGAGCTCGCGACACTCTTTCCCTTTTTTTTTT	56387.3
UDG_UG_f1GG_f2CCG	10474	31944	31944	0	CGCGAGCTCGGUCCGCTCGCGGGAACGCGAGCGGGCCGAGCTCGCGACACTCTTTCCCTTTTTTTTTT	36506
UDG_UG_f1GG_f2TAG	9911	30915	30915	0	CGCGAGCTCGGUTAGCTCGCGGGAACGCGAGCTAGCCGAGCTCGCGACACTCTTTCCCTTTTTTTTTT	35625.9
UDG_UG_f1GT_f2GGG	10783	33652	33652	0	CGCGAGCTCGTUGGGCTCGCGGGAACGCGAGCCCGACGAGCTCGCGACACTCTTTCCCTTTTTTTTTT	39237.6
UDG_UG_f1CC_f2CGT	9781	30229	30229	0	CGCGAGCTCCCUCGTCTCGCGGGAACGCGAGACGGGGGAGCTCGCGACACTCTTTCCCTTTTTTTTTT	35432.2
UDG_UG_f1AA_f2AAT	17657	53334	53435	0	CGCGAGCTCAAUAATCTCGCGGGAACGCGAGATTGTTGAGCTCGCGACACTCTTTCCCTTTTTTTTTT	63597.6
UDG_UG_f1AG_f2TGC	11196	35605	35605	0	CGCGAGCTCAGUTGCCTCGCGGGAACGCGAGGCAGCTGAGCTCGCGACACTCTTTCCCTTTTTTTTTT	43265.1
UDG_UG_f1GG_f2ATA	18886	55544	57157	0	CGCGAGCTCGGUATACTCGCGGGAACGCGAGTATGCCGAGCTCGCGACACTCTTTCCCTTTTTTTTTT	71514.6
UDG_UG_f1TA_f2AGA	11062	35582	35582	0	CGCGAGCTCTAUAGACTCGCGGGAACGCGAGTCTGTAGAGCTCGCGACACTCTTTCCCTTTTTTTTTT	45741.7
UDG_UG_f1AT_f2CCG	10819	34470	34470	0	CGCGAGCTCATUCCGCTCGCGGGAACGCGAGCGGGATGAGCTCGCGACACTCTTTCCCTTTTTTTTTT	46833.8
UDG_UG_f1AT_f2ATG	19871	59727	60141	0	CGCGAGCTCATUATGCTCGCGGGAACGCGAGCATGATGAGCTCGCGACACTCTTTCCCTTTTTTTTTT	84570.5
UDG_UG_f1TA_f2TGA	9000	28466	28466	0	CGCGAGCTCTAUTGACTCGCGGGAACGCGAGTCAGTAGAGCTCGCGACACTCTTTCCCTTTTTTTTTT	41561.3
UDG_UG_f1GG_f2AAT	16995	51330	51430	0	CGCGAGCTCGGUAATCTCGCGGGAACGCGAGATTGCCGAGCTCGCGACACTCTTTCCCTTTTTTTTTT	78504.8
UDG_UG_f1GA_f2GAT	7106	22380	22380	0	CGCGAGCTCGAUGATCTCGCGGGAACGCGAGATCGTCGAGCTCGCGACACTCTTTCCCTTTTTTTTTT	36601
UDG_UG_f1TG_f2GGT	6471	20080	20080	0	CGCGAGCTCTGUGGTCTCGCGGGAACGCGAGACCGCAGAGCTCGCGACACTCTTTCCCTTTTTTTTTT	34127
UDG_UG_f1CC_f2GAA	4996	15434	15434	0	CGCGAGCTCCCUGAACTCGCGGGAACGCGAGTTCGGGGAGCTCGCGACACTCTTTCCCTTTTTTTTTT	27703.6
UDG_UG_f1GT_f2ACA	5683	17702	17702	0	CGCGAGCTCGTUACACTCGCGGGAACGCGAGTGTGACGAGCTCGCGACACTCTTTCCCTTTTTTTTTT	31774.6
UDG_UG_f1AC_f2GCC	4452	13702	13702	0	CGCGAGCTCACUGCCCTCGCGGGAACGCGAGGGCGGTGAGCTCGCGACACTCTTTCCCTTTTTTTTTT	24594.7
UDG_UG_f1TA_f2CTC	4281	12649	12649	0	CGCGAGCTCTAUCTCCTCGCGGGAACGCGAGGAGGTAGAGCTCGCGACACTCTTTCCCTTTTTTTTTT	22704.6
UDG_UG_f1AC_f2TAT	3151	9178	9178	0	CGCGAGCTCACUTATCTCGCGGGAACGCGAGATAGGTGAGCTCGCGACACTCTTTCCCTTTTTTTTTT	16474.2
UDG_UG_f1TG_f2CCA	2890	8412	8412	0	CGCGAGCTCTGUCCACTCGCGGGAACGCGAGTGGGCAGAGCTCGCGACACTCTTTCCCTTTTTTTTTT	15099.3
UDG_UG_f1CT_f2TGC	2157	6189	6189	0	CGCGAGCTCCTUTGCCTCGCGGGAACGCGAGGCAGAGGAGCTCGCGACACTCTTTCCCTTTTTTTTTT	11109.1
UDG_UG_f1TC_f2GGA	1898	5385	5385	0	CGCGAGCTCTCUGGACTCGCGGGAACGCGAGTCCGGAGAGCTCGCGACACTCTTTCCCTTTTTTTTTT	9665.91
UDG_UG_f1CC_f2CTC	11963	37504	37504	0	CGCGAGCTCCCUCTCCTCGCGGGAACGCGAGGAGGGGGAGCTCGCGACACTCTTTCCCTTTTTTTTTT	33395.5
UDG_UG_f1GA_f2TTC	14841	47226	47226	0	CGCGAGCTCGAUTTCCTCGCGGGAACGCGAGGAAGTCGAGCTCGCGACACTCTTTCCCTTTTTTTTTT	42052.4
UDG_UG_f1AC_f2ATG	17790	54913	53838	0	CGCGAGCTCACUATGCTCGCGGGAACGCGAGCATGGTGAGCTCGCGACACTCTTTCCCTTTTTTTTTT	47940.1
UDG_UG_f1CG_f2AGT	22191	64847	67168	0	CGCGAGCTCCGUAGTCTCGCGGGAACGCGAGACTGCGGAGCTCGCGACACTCTTTCCCTTTTTTTTTT	59809.8
UDG_UG_f1AG_f2CAA	12922	39569	39569	0	CGCGAGCTCAGUCAACTCGCGGGAACGCGAGTTGGCTGAGCTCGCGACACTCTTTCCCTTTTTTTTTT	35234.2
UDG_UG_f1CC_f2ACA	10921	33184	33184	0	CGCGAGCTCCCUACACTCGCGGGAACGCGAGTGTGGGGAGCTCGCGACACTCTTTCCCTTTTTTTTTT	29548.7
UDG_UG_f1TG_f2GAA	13023	40598	40598	0	CGCGAGCTCTGUGAACTCGCGGGAACGCGAGTTCGCAGAGCTCGCGACACTCTTTCCCTTTTTTTTTT	36150.5
UDG_UG_f1AC_f2GAT	10064	29812	29812	0	CGCGAGCTCACUGATCTCGCGGGAACGCGAGATCGGTGAGCTCGCGACACTCTTTCCCTTTTTTTTTT	26546.1
UDG_UG_f1GG_f2TTA	13931	43012	43012	0	CGCGAGCTCGGUTTACTCGCGGGAACGCGAGTAAGCCGAGCTCGCGACACTCTTTCCCTTTTTTTTTT	38197.5
UDG_UG_f1GT_f2ATC	20042	63907	60659	0	CGCGAGCTCGTUATCCTCGCGGGAACGCGAGGATGACGAGCTCGCGACACTCTTTCCCTTTTTTTTTT	53216.6
UDG_UG_f1GC_f2CCC	7586	24308	24308	0	CGCGAGCTCGCUCCCCTCGCGGGAACGCGAGGGGGGCGAGCTCGCGACACTCTTTCCCTTTTTTTTTT	21325.6
UDG_UG_f1CC_f2ACC	8421	27210	27210	0	CGCGAGCTCCCUACCCTCGCGGGAACGCGAGGGTGGGGAGCTCGCGACACTCTTTCCCTTTTTTTTTT	24229.2
UDG_UG_f1CA_f2GCC	11830	36303	36303	0	CGCGAGCTCCAUGCCCTCGCGGGAACGCGAGGGCGTGGAGCTCGCGACACTCTTTCCCTTTTTTTTTT	32326
UDG_random_6b_5	9239	28791	28791	0	CGCGAGCTCTACTCGCTCGCGGGAACGCGAGCGAGTAGAGCTCGCGACACTCTTTCCCTTTTTTTTTT	25802.7
UDG_UG_f1GA_f2GAA	15558	48377	48377	0	CGCGAGCTCGAUGAACTCGCGGGAACGCGAGTTCGTCGAGCTCGCGACACTCTTTCCCTTTTTTTTTT	43765.5
UDG_UG_f1CT_f2CGC	13139	42346	42346	0	CGCGAGCTCCTUCGCCTCGCGGGAACGCGAGGCGGAGGAGCTCGCGACACTCTTTCCCTTTTTTTTTT	38355.2
UDG_UG_f1TA_f2ATA	22214	65535	67237	0	CGCGAGCTCTAUATACTCGCGGGAACGCGAGTATGTAGAGCTCGCGACACTCTTTCCCTTTTTTTTTT	60879.6
UDG_UG_f1CG_f2GCT	15236	48765	48765	0	CGCGAGCTCCGUGCTCTCGCGGGAACGCGAGAGCGCGGAGCTCGCGACACTCTTTCCCTTTTTTTTTT	44150.9
UDG_UG_f1GG_f2AAC	27442	65535	83072	0	CGCGAGCTCGGUAACCTCGCGGGAACGCGAGGTTGCCGAGCTCGCGACACTCTTTCCCTTTTTTTTTT	74247.4
UDG_UG_f1TC_f2CAC	9895	31479	31479	0	CGCGAGCTCTCUCACCTCGCGGGAACGCGAGGTGGGAGAGCTCGCGACACTCTTTCCCTTTTTTTTTT	27398.1
UDG_UG_f1AA_f2CTA	17807	58741	53889	0	CGCGAGCTCAAUCTACTCGCGGGAACGCGAGTAGGTTGAGCTCGCGACACTCTTTCCCTTTTTTTTTT	46489
UDG_UG_f1CT_f2CCG	12047	36050	36050	0	CGCGAGCTCCTUCCGCTCGCGGGAACGCGAGCGGGAGGAGCTCGCGACACTCTTTCCCTTTTTTTTTT	31209.1
UDG_UG_f1CC_f2GAC	10954	34413	34413	0	CGCGAGCTCCCUGACCTCGCGGGAACGCGAGGTCGGGGAGCTCGCGACACTCTTTCCCTTTTTTTTTT	29762.8
UDG_UG_f1GC_f2TCT	10974	34709	34709	0	CGCGAGCTCGCUTCTCTCGCGGGAACGCGAGAGAGGCGAGCTCGCGACACTCTTTCCCTTTTTTTTTT	30048.2
UDG_UG_f1CT_f2TGG	10948	34579	34579	0	CGCGAGCTCCTUTGGCTCGCGGGAACGCGAGCCAGAGGAGCTCGCGACACTCTTTCCCTTTTTTTTTT	30255
UDG_UG_f1TA_f2GCT	13461	46667	46667	0	CGCGAGCTCTAUGCTCTCGCGGGAACGCGAGAGCGTAGAGCTCGCGACACTCTTTCCCTTTTTTTTTT	40753.7
UDG_UG_f1CC_f2CGA	10899	34536	34536	0	CGCGAGCTCCCUCGACTCGCGGGAACGCGAGTCGGGGGAGCTCGCGACACTCTTTCCCTTTTTTTTTT	30159.8
UDG_UG_f1GG_f2GGA	14450	46485	46485	0	CGCGAGCTCGGUGGACTCGCGGGAACGCGAGTCCGCCGAGCTCGCGACACTCTTTCCCTTTTTTTTTT	40672.2
UDG_UG_f1AT_f2GGT	12116	38787	38787	0	CGCGAGCTCATUGGTCTCGCGGGAACGCGAGACCGATGAGCTCGCGACACTCTTTCCCTTTTTTTTTT	34194.5
UDG_UG_f1TC_f2TTA	11141	37025	37025	0	CGCGAGCTCTCUTTACTCGCGGGAACGCGAGTAAGGAGAGCTCGCGACACTCTTTCCCTTTTTTTTTT	33039.4
UDG_UG_f1CT_f2GTG	15632	49971	49971	0	CGCGAGCTCCTUGTGCTCGCGGGAACGCGAGCACGAGGAGCTCGCGACACTCTTTCCCTTTTTTTTTT	44054.3
UDG_UG_f1CA_f2GCG	12036	40153	40153	0	CGCGAGCTCCAUGCGCTCGCGGGAACGCGAGCGCGTGGAGCTCGCGACACTCTTTCCCTTTTTTTTTT	35961.1
UDG_UG_f1CA_f2TGA	10877	36730	36730	0	CGCGAGCTCCAUTGACTCGCGGGAACGCGAGTCAGTGGAGCTCGCGACACTCTTTCCCTTTTTTTTTT	33384
UDG_UG_f1GT_f2ACT	15034	49962	49962	0	CGCGAGCTCGTUACTCTCGCGGGAACGCGAGAGTGACGAGCTCGCGACACTCTTTCCCTTTTTTTTTT	45399.5
UDG_UG_f1GT_f2TAG	11720	38354	38354	0	CGCGAGCTCGTUTAGCTCGCGGGAACGCGAGCTAGACGAGCTCGCGACACTCTTTCCCTTTTTTTTTT	34860.1
UDG_UG_f1AC_f2GAC	10800	34719	34719	0	CGCGAGCTCACUGACCTCGCGGGAACGCGAGGTCGGTGAGCTCGCGACACTCTTTCCCTTTTTTTTTT	31600.3
UDG_UG_f1GA_f2CCT	10895	36841	36841	0	CGCGAGCTCGAUCCTCTCGCGGGAACGCGAGAGGGTCGAGCTCGCGACACTCTTTCCCTTTTTTTTTT	33562.1
UDG_UG_f1GA_f2AAA	30312	65535	91764	0	CGCGAGCTCGAUAAACTCGCGGGAACGCGAGTTTGTCGAGCTCGCGACACTCTTTCCCTTTTTTTTTT	84569.4
UDG_UG_f1GC_f2TTC	10379	33880	33880	0	CGCGAGCTCGCUTTCCTCGCGGGAACGCGAGGAAGGCGAGCTCGCGACACTCTTTCCCTTTTTTTTTT	31894.7
UDG_UG_f1GT_f2TAG	10468	33355	33355	0	CGCGAGCTCGTUTAGCTCGCGGGAACGCGAGCTAGACGAGCTCGCGACACTCTTTCCCTTTTTTTTTT	31456.2
UDG_UG_f1AT_f2GCC	12275	38132	38132	0	CGCGAGCTCATUGCCCTCGCGGGAACGCGAGGGCGATGAGCTCGCGACACTCTTTCCCTTTTTTTTTT	36496.8
UDG_UG_f1TC_f2TAA	11018	35287	35287	0	CGCGAGCTCTCUTAACTCGCGGGAACGCGAGTTAGGAGAGCTCGCGACACTCTTTCCCTTTTTTTTTT	33977.8
UDG_UC_randomFlank	13375	42984	42984	0	CGCGAGCTCACUCTACGCGCGGGAACGCGCGTAGCGTGAGCTCGCGACACTCTTTCCCTTTTTTTTTT	41942.5
UDG_UG_f1GG_f2CGT	11825	36997	36997	0	CGCGAGCTCGGUCGTCTCGCGGGAACGCGAGACGGCCGAGCTCGCGACACTCTTTCCCTTTTTTTTTT	36680.6
UDG_UG_f1CC_f2GGA	8413	27072	27072	0	CGCGAGCTCCCUGGACTCGCGGGAACGCGAGTCCGGGGAGCTCGCGACACTCTTTCCCTTTTTTTTTT	26969.3
UDG_UG_f1GA_f2ATC	21385	63943	64726	0	CGCGAGCTCGAUATCCTCGCGGGAACGCGAGGATGTCGAGCTCGCGACACTCTTTCCCTTTTTTTTTT	65200.7
UDG_UG_f1AC_f2AGG	11224	34762	34762	0	CGCGAGCTCACUAGGCTCGCGGGAACGCGAGCCTGGTGAGCTCGCGACACTCTTTCCCTTTTTTTTTT	35642.3
UDG_UG_f1GT_f2GGG	10888	33129	33129	0	CGCGAGCTCGTUGGGCTCGCGGGAACGCGAGCCCGACGAGCTCGCGACACTCTTTCCCTTTTTTTTTT	34112.9
UDG_UG_f1GT_f2CAA	10832	34372	34372	0	CGCGAGCTCGTUCAACTCGCGGGAACGCGAGTTGGACGAGCTCGCGACACTCTTTCCCTTTTTTTTTT	36733.7
UDG_UG_f1TT_f2TTG	11412	34323	34323	0	CGCGAGCTCTTUTTGCTCGCGGGAACGCGAGCAAGAAGAGCTCGCGACACTCTTTCCCTTTTTTTTTT	37345.3
UDG_UG_f1CA_f2CCA	9509	29192	29192	0	CGCGAGCTCCAUCCACTCGCGGGAACGCGAGTGGGTGGAGCTCGCGACACTCTTTCCCTTTTTTTTTT	32467.1
UDG_UG_f1GC_f2ATT	14124	42434	42434	0	CGCGAGCTCGCUATTCTCGCGGGAACGCGAGAATGGCGAGCTCGCGACACTCTTTCCCTTTTTTTTTT	47916.2
UDG_UG_f1AT_f2AAG	14924	45650	45650	0	CGCGAGCTCATUAAGCTCGCGGGAACGCGAGCTTGATGAGCTCGCGACACTCTTTCCCTTTTTTTTTT	52169.3
UDG_UG_f1CT_f2TAA	10735	34317	34317	0	CGCGAGCTCCTUTAACTCGCGGGAACGCGAGTTAGAGGAGCTCGCGACACTCTTTCCCTTTTTTTTTT	39301.3
UDG_UG_f1TT_f2ATT	22829	65535	69100	0	CGCGAGCTCTTUATTCTCGCGGGAACGCGAGAATGAAGAGCTCGCGACACTCTTTCCCTTTTTTTTTT	80164.2
UDG_UG_f1CA_f2TAG	8487	25466	25466	0	CGCGAGCTCCAUTAGCTCGCGGGAACGCGAGCTAGTGGAGCTCGCGACACTCTTTCCCTTTTTTTTTT	29813.6
UDG_UG_f1CG_f2TTA	10027	31280	31280	0	CGCGAGCTCCGUTTACTCGCGGGAACGCGAGTAAGCGGAGCTCGCGACACTCTTTCCCTTTTTTTTTT	37127.9
UDG_UG_f1TA_f2CCG	8693	26964	26964	0	CGCGAGCTCTAUCCGCTCGCGGGAACGCGAGCGGGTAGAGCTCGCGACACTCTTTCCCTTTTTTTTTT	32508.8
UDG_UG_f1TA_f2AGG	10581	33033	33033	0	CGCGAGCTCTAUAGGCTCGCGGGAACGCGAGCCTGTAGAGCTCGCGACACTCTTTCCCTTTTTTTTTT	41037.7
UDG_UG_f1CC_f2AGG	8309	25276	25276	0	CGCGAGCTCCCUAGGCTCGCGGGAACGCGAGCCTGGGGAGCTCGCGACACTCTTTCCCTTTTTTTTTT	32117.4
UDG_UG_f1AT_f2TTA	10095	31695	31695	0	CGCGAGCTCATUTTACTCGCGGGAACGCGAGTAAGATGAGCTCGCGACACTCTTTCCCTTTTTTTTTT	41697.1
UDG_UG_f1AC_f2GAT	7610	23243	23243	0	CGCGAGCTCACUGATCTCGCGGGAACGCGAGATCGGTGAGCTCGCGACACTCTTTCCCTTTTTTTTTT	31771.6
UDG_UG_f1TT_f2AAC	10228	31299	31299	0	CGCGAGCTCTTUAACCTCGCGGGAACGCGAGGTTGAAGAGCTCGCGACACTCTTTCCCTTTTTTTTTT	44242.2
UDG_UG_f1AA_f2GTA	10399	32428	32428	0	CGCGAGCTCAAUGTACTCGCGGGAACGCGAGTACGTTGAGCTCGCGACACTCTTTCCCTTTTTTTTTT	47868.9
UDG_UG_f1GG_f2TCT	6123	19061	19061	0	CGCGAGCTCGGUTCTCTCGCGGGAACGCGAGAGAGCCGAGCTCGCGACACTCTTTCCCTTTTTTTTTT	29590.3
UDG_UG_f1GC_f2GCG	5823	18140	18140	0	CGCGAGCTCGCUGCGCTCGCGGGAACGCGAGCGCGGCGAGCTCGCGACACTCTTTCCCTTTTTTTTTT	29772.9
UDG_UG_f1AC_f2ATC	7174	21393	21393	0	CGCGAGCTCACUATCCTCGCGGGAACGCGAGGATGGTGAGCTCGCGACACTCTTTCCCTTTTTTTTTT	36446.9
UDG_UG_f1GT_f2CCG	6882	21319	21319	0	CGCGAGCTCGTUCCGCTCGCGGGAACGCGAGCGGGACGAGCTCGCGACACTCTTTCCCTTTTTTTTTT	38267
UDG_UG_f1CC_f2CGG	4876	15155	15155	0	CGCGAGCTCCCUCGGCTCGCGGGAACGCGAGCCGGGGGAGCTCGCGACACTCTTTCCCTTTTTTTTTT	27202.8
UDG_UG_f1CT_f2CAT	5383	16727	16727	0	CGCGAGCTCCTUCATCTCGCGGGAACGCGAGATGGAGGAGCTCGCGACACTCTTTCCCTTTTTTTTTT	30024.5
UDG_UG_f1TA_f2TTC	4298	12924	12924	0	CGCGAGCTCTAUTTCCTCGCGGGAACGCGAGGAAGTAGAGCTCGCGACACTCTTTCCCTTTTTTTTTT	23198.2
UDG_UG_f1CA_f2AAT	6174	18195	18195	0	CGCGAGCTCCAUAATCTCGCGGGAACGCGAGATTGTGGAGCTCGCGACACTCTTTCCCTTTTTTTTTT	32659.5
UDG_UG_f1TG_f2TGA	2719	7896	7896	0	CGCGAGCTCTGUTGACTCGCGGGAACGCGAGTCAGCAGAGCTCGCGACACTCTTTCCCTTTTTTTTTT	14173.1
UDG_UG_f1CC_f2CAT	2057	6026	6026	0	CGCGAGCTCCCUCATCTCGCGGGAACGCGAGATGGGGGAGCTCGCGACACTCTTTCCCTTTTTTTTTT	10816.5
UDG_UG_f1CG_f2GAG	2424	7118	7118	0	CGCGAGCTCCGUGAGCTCGCGGGAACGCGAGCTCGCGGAGCTCGCGACACTCTTTCCCTTTTTTTTTT	12776.6
UDG_UG_f1TA_f2TTG	13164	43056	43056	0	CGCGAGCTCTAUTTGCTCGCGGGAACGCGAGCAAGTAGAGCTCGCGACACTCTTTCCCTTTTTTTTTT	37621.5
UDG_UG_f1GA_f2TAC	11623	35544	35544	0	CGCGAGCTCGAUTACCTCGCGGGAACGCGAGGTAGTCGAGCTCGCGACACTCTTTCCCTTTTTTTTTT	31057.6
UDG_UG_f1GG_f2AGC	17301	52838	52357	0	CGCGAGCTCGGUAGCCTCGCGGGAACGCGAGGCTGCCGAGCTCGCGACACTCTTTCCCTTTTTTTTTT	45748.5
UDG_UG_f1GC_f2ACT	12970	40478	40478	0	CGCGAGCTCGCUACTCTCGCGGGAACGCGAGAGTGGCGAGCTCGCGACACTCTTTCCCTTTTTTTTTT	35368.9
UDG_UG_f1GT_f2AAG	13714	42602	42602	0	CGCGAGCTCGTUAAGCTCGCGGGAACGCGAGCTTGACGAGCTCGCGACACTCTTTCCCTTTTTTTTTT	37224.8
UDG_MM_CA	10224	30828	30828	0	CGCGAGCTCACCCTTACCGCGGGAACGCGGTAAGAGTGAGCTCGCGACACTCTTTCCCTTTTTTTTTT	26936.9
UDG_UG_f1AT_f2TCC	12446	39224	39224	0	CGCGAGCTCATUTCCCTCGCGGGAACGCGAGGGAGATGAGCTCGCGACACTCTTTCCCTTTTTTTTTT	34273.1
UDG_UG_f1TT_f2ATA	29172	65535	88312	0	CGCGAGCTCTTUATACTCGCGGGAACGCGAGTATGAAGAGCTCGCGACACTCTTTCCCTTTTTTTTTT	77165.3
UDG_UG_f1GG_f2ATA	24373	65535	73776	0	CGCGAGCTCGGUATACTCGCGGGAACGCGAGTATGCCGAGCTCGCGACACTCTTTCCCTTTTTTTTTT	64724.3
UDG_UG_f1GA_f2TTT	14387	47026	47026	0	CGCGAGCTCGAUTTTCTCGCGGGAACGCGAGAAAGTCGAGCTCGCGACACTCTTTCCCTTTTTTTTTT	41762.2
UDG_UG_f1TC_f2AGG	8232	25771	25771	0	CGCGAGCTCTCUAGGCTCGCGGGAACGCGAGCCTGGAGAGCTCGCGACACTCTTTCCCTTTTTTTTTT	22886.4
UDG_UG_f1AG_f2AGA	14439	45362	45362	0	CGCGAGCTCAGUAGACTCGCGGGAACGCGAGTCTGCTGAGCTCGCGACACTCTTTCCCTTTTTTTTTT	40392.6
UDG_UG_f1AT_f2CTA	21547	65535	65217	0	CGCGAGCTCATUCTACTCGCGGGAACGCGAGTAGGATGAGCTCGCGACACTCTTTCCCTTTTTTTTTT	58072.5
UDG_UG_f1CG_f2TCA	12647	41033	41033	0	CGCGAGCTCCGUTCACTCGCGGGAACGCGAGTGAGCGGAGCTCGCGACACTCTTTCCCTTTTTTTTTT	36603.7
UDG_UG_f1GG_f2GGA	15485	48763	48763	0	CGCGAGCTCGGUGGACTCGCGGGAACGCGAGTCCGCCGAGCTCGCGACACTCTTTCCCTTTTTTTTTT	44057.8
UDG_UG_f1CC_f2CCA	9054	29054	29054	0	CGCGAGCTCCCUCCACTCGCGGGAACGCGAGTGGGGGGAGCTCGCGACACTCTTTCCCTTTTTTTTTT	26284.4
UDG_UG_f1TC_f2GCG	10749	34206	34206	0	CGCGAGCTCTCUGCGCTCGCGGGAACGCGAGCGCGGAGAGCTCGCGACACTCTTTCCCTTTTTTTTTT	30905.4
UDG_UG_f1AA_f2GTC	19375	62439	58638	0	CGCGAGCTCAAUGTCCTCGCGGGAACGCGAGGACGTTGAGCTCGCGACACTCTTTCCCTTTTTTTTTT	52308.3
UDG_UG_f1CA_f2GCC	12789	40184	40184	0	CGCGAGCTCCAUGCCCTCGCGGGAACGCGAGGGCGTGGAGCTCGCGACACTCTTTCCCTTTTTTTTTT	35247.9
UDG_UG_f1CA_f2AGG	14427	46215	46215	0	CGCGAGCTCCAUAGGCTCGCGGGAACGCGAGCCTGTGGAGCTCGCGACACTCTTTCCCTTTTTTTTTT	39806
UDG_UG_f1AG_f2CCC	13741	42541	42541	0	CGCGAGCTCAGUCCCCTCGCGGGAACGCGAGGGGGCTGAGCTCGCGACACTCTTTCCCTTTTTTTTTT	36461.4
UDG_UG_f1AT_f2ATC	29484	65535	89257	0	CGCGAGCTCATUATCCTCGCGGGAACGCGAGGATGATGAGCTCGCGACACTCTTTCCCTTTTTTTTTT	77000.3
UDG_UG_f1AG_f2GTT	18391	58850	55658	0	CGCGAGCTCAGUGTTCTCGCGGGAACGCGAGAACGCTGAGCTCGCGACACTCTTTCCCTTTTTTTTTT	48015.1
UDG_UG_f1GA_f2ATG	29188	65535	88360	0	CGCGAGCTCGAUATGCTCGCGGGAACGCGAGCATGTCGAGCTCGCGACACTCTTTCCCTTTTTTTTTT	76226.5
UDG_UG_f1AA_f2CAT	13533	45636	45636	0	CGCGAGCTCAAUCATCTCGCGGGAACGCGAGATGGTTGAGCTCGCGACACTCTTTCCCTTTTTTTTTT	39562.2
UDG_UG_f1GG_f2CCT	12132	38909	38909	0	CGCGAGCTCGGUCCTCTCGCGGGAACGCGAGAGGGCCGAGCTCGCGACACTCTTTCCCTTTTTTTTTT	33651.2
UDG_UG_f1GT_f2CCG	13380	42955	42955	0	CGCGAGCTCGTUCCGCTCGCGGGAACGCGAGCGGGACGAGCTCGCGACACTCTTTCCCTTTTTTTTTT	37150.5
UDG_UG_f1CA_f2GAA	13636	44822	44822	0	CGCGAGCTCCAUGAACTCGCGGGAACGCGAGTTCGTGGAGCTCGCGACACTCTTTCCCTTTTTTTTTT	38856.6
UDG_UG_f1AG_f2TGG	10484	33280	33280	0	CGCGAGCTCAGUTGGCTCGCGGGAACGCGAGCCAGCTGAGCTCGCGACACTCTTTCCCTTTTTTTTTT	29118.4
UDG_UG_f1TG_f2GTA	21071	63624	63775	0	CGCGAGCTCTGUGTACTCGCGGGAACGCGAGTACGCAGAGCTCGCGACACTCTTTCCCTTTTTTTTTT	55941.1
UDG_MM_CC	12258	39833	39833	0	CGCGAGCTCACCCTTACCGCGGGAACGCGGTAAGCGTGAGCTCGCGACACTCTTTCCCTTTTTTTTTT	34852
UDG_Uloop	11410	36591	36591	0	CGCGAGCTCGGCTATCTCGCGGUAACGCGAGATAGCCGAGCTCGCGACACTCTTTCCCTTTTTTTTTT	32652.1
UDG_UG_f1GC_f2AAC	14599	47465	47465	0	CGCGAGCTCGCUAACCTCGCGGGAACGCGAGGTTGGCGAGCTCGCGACACTCTTTCCCTTTTTTTTTT	42729.2
UDG_UG_f1CT_f2TCC	10367	33998	33998	0	CGCGAGCTCCTUTCCCTCGCGGGAACGCGAGGGAGAGGAGCTCGCGACACTCTTTCCCTTTTTTTTTT	30605.9
UDG_UG_f1GA_f2TAG	11146	35703	35703	0	CGCGAGCTCGAUTAGCTCGCGGGAACGCGAGCTAGTCGAGCTCGCGACACTCTTTCCCTTTTTTTTTT	32142.3
UDG_UG_f1GC_f2CTC	9417	29485	29485	0	CGCGAGCTCGCUCTCCTCGCGGGAACGCGAGGAGGGCGAGCTCGCGACACTCTTTCCCTTTTTTTTTT	26679.6
UDG_UG_f1AG_f2CCT	11295	35971	35971	0	CGCGAGCTCAGUCCTCTCGCGGGAACGCGAGAGGGCTGAGCTCGCGACACTCTTTCCCTTTTTTTTTT	32527.8
UDG_UG_f1CC_f2AAT	17049	56974	51593	0	CGCGAGCTCCCUAATCTCGCGGGAACGCGAGATTGGGGAGCTCGCGACACTCTTTCCCTTTTTTTTTT	46958.5
UDG_UG_f1GT_f2CGG	12901	41481	41481	0	CGCGAGCTCGTUCGGCTCGCGGGAACGCGAGCCGGACGAGCTCGCGACACTCTTTCCCTTTTTTTTTT	38109.6
UDG_UG_f1GT_f2GCT	11281	34880	34880	0	CGCGAGCTCGTUGCTCTCGCGGGAACGCGAGAGCGACGAGCTCGCGACACTCTTTCCCTTTTTTTTTT	32190
UDG_UG_f1AC_f2ACT	11971	36025	36025	0	CGCGAGCTCACUACTCTCGCGGGAACGCGAGAGTGGTGAGCTCGCGACACTCTTTCCCTTTTTTTTTT	33974.2
UDG_UG_f1GG_f2CTA	13797	43999	43999	0	CGCGAGCTCGGUCTACTCGCGGGAACGCGAGTAGGCCGAGCTCGCGACACTCTTTCCCTTTTTTTTTT	42039.6
UDG_UG_f1CG_f2TGC	11456	36319	36319	0	CGCGAGCTCCGUTGCCTCGCGGGAACGCGAGGCAGCGGAGCTCGCGACACTCTTTCCCTTTTTTTTTT	34909
UDG_UG_f1CA_f2AAG	15446	51229	46738	0	CGCGAGCTCCAUAAGCTCGCGGGAACGCGAGCTTGTGGAGCTCGCGACACTCTTTCCCTTTTTTTTTT	45605.5
UDG_UG_f1GC_f2TCG	9454	29392	29392	0	CGCGAGCTCGCUTCGCTCGCGGGAACGCGAGCGAGGCGAGCTCGCGACACTCTTTCCCTTTTTTTTTT	29003.6
UDG_UG_f1TC_f2GCG	9444	28598	28598	0	CGCGAGCTCTCUGCGCTCGCGGGAACGCGAGCGCGGAGAGCTCGCGACACTCTTTCCCTTTTTTTTTT	28489.5
UDG_UG_f1AT_f2ACT	13470	42251	42251	0	CGCGAGCTCATUACTCTCGCGGGAACGCGAGAGTGATGAGCTCGCGACACTCTTTCCCTTTTTTTTTT	42684.7
UDG_UG_f1AT_f2ACA	12289	38111	38111	0	CGCGAGCTCATUACACTCGCGGGAACGCGAGTGTGATGAGCTCGCGACACTCTTTCCCTTTTTTTTTT	38983.5
UDG_UG_f1AG_f2GGA	11244	34455	34455	0	CGCGAGCTCAGUGGACTCGCGGGAACGCGAGTCCGCTGAGCTCGCGACACTCTTTCCCTTTTTTTTTT	36819.2
UDG_UG_f1AC_f2CCA	9543	29410	29410	0	CGCGAGCTCACUCCACTCGCGGGAACGCGAGTGGGGTGAGCTCGCGACACTCTTTCCCTTTTTTTTTT	31999.7
UDG_UG_f1AA_f2TGG	10571	31892	31892	0	CGCGAGCTCAAUTGGCTCGCGGGAACGCGAGCCAGTTGAGCTCGCGACACTCTTTCCCTTTTTTTTTT	35470
UDG_UG_f1TG_f2GTG	13623	41884	41884	0	CGCGAGCTCTGUGTGCTCGCGGGAACGCGAGCACGCAGAGCTCGCGACACTCTTTCCCTTTTTTTTTT	47556.8
UDG_UG_f1TT_f2GTT	13769	43481	43481	0	CGCGAGCTCTTUGTTCTCGCGGGAACGCGAGAACGAAGAGCTCGCGACACTCTTTCCCTTTTTTTTTT	49796.3
UDG_MM_TG	9227	28590	28590	0	CGCGAGCTCACTCTTACCGCGGGAACGCGGTAAGGGTGAGCTCGCGACACTCTTTCCCTTTTTTTTTT	32796
UDG_UG_f1GT_f2ATG	19211	59974	58142	0	CGCGAGCTCGTUATGCTCGCGGGAACGCGAGCATGACGAGCTCGCGACACTCTTTCCCTTTTTTTTTT	67629.1
UDG_UG_f1GC_f2TAT	8428	26201	26201	0	CGCGAGCTCGCUTATCTCGCGGGAACGCGAGATAGGCGAGCTCGCGACACTCTTTCCCTTTTTTTTTT	30839.3
UDG_UG_f1CT_f2CCG	11214	33403	33403	0	CGCGAGCTCCTUCCGCTCGCGGGAACGCGAGCGGGAGGAGCTCGCGACACTCTTTCCCTTTTTTTTTT	39841.3
UDG_UG_f1CA_f2ATG	16075	50059	48643	0	CGCGAGCTCCAUATGCTCGCGGGAACGCGAGCATGTGGAGCTCGCGACACTCTTTCCCTTTTTTTTTT	59346.9
UDG_UG_f1CG_f2GGC	10260	31214	31214	0	CGCGAGCTCCGUGGCCTCGCGGGAACGCGAGGCCGCGGAGCTCGCGACACTCTTTCCCTTTTTTTTTT	39200
UDG_UG_f1GC_f2TCA	7099	22106	22106	0	CGCGAGCTCGCUTCACTCGCGGGAACGCGAGTGAGGCGAGCTCGCGACACTCTTTCCCTTTTTTTTTT	28560.2
UDG_UG_f1AA_f2TGA	8271	25097	25097	0	CGCGAGCTCAAUTGACTCGCGGGAACGCGAGTCAGTTGAGCTCGCGACACTCTTTCCCTTTTTTTTTT	34098.9
UDG_UG_f1AT_f2TCG	7568	22635	22635	0	CGCGAGCTCATUTCGCTCGCGGGAACGCGAGCGAGATGAGCTCGCGACACTCTTTCCCTTTTTTTTTT	31604.5
UDG_UG_f1GC_f2GGT	8324	26282	26282	0	CGCGAGCTCGCUGGTCTCGCGGGAACGCGAGACCGGCGAGCTCGCGACACTCTTTCCCTTTTTTTTTT	38274.8
UDG_UG_f1GA_f2AGT	13360	39833	39833	0	CGCGAGCTCGAUAGTCTCGCGGGAACGCGAGACTGTCGAGCTCGCGACACTCTTTCCCTTTTTTTTTT	58970.9
UDG_UG_f1TA_f2TAC	6430	20148	20148	0	CGCGAGCTCTAUTACCTCGCGGGAACGCGAGGTAGTAGAGCTCGCGACACTCTTTCCCTTTTTTTTTT	31820.3
UDG_UG_f1GG_f2CTA	7653	23677	23677	0	CGCGAGCTCGGUCTACTCGCGGGAACGCGAGTAGGCCGAGCTCGCGACACTCTTTCCCTTTTTTTTTT	39093.9
UDG_UG_f1TT_f2ACG	6986	21475	21475	0	CGCGAGCTCTTUACGCTCGCGGGAACGCGAGCGTGAAGAGCTCGCGACACTCTTTCCCTTTTTTTTTT	37150.5
UDG_UG_f1AG_f2TTT	6055	18652	18652	0	CGCGAGCTCAGUTTTCTCGCGGGAACGCGAGAAAGCTGAGCTCGCGACACTCTTTCCCTTTTTTTTTT	34132.9
UDG_UG_f1TG_f2TAT	5468	16483	16483	0	CGCGAGCTCTGUTATCTCGCGGGAACGCGAGATAGCAGAGCTCGCGACACTCTTTCCCTTTTTTTTTT	30163.6
UDG_UG_f1AA_f2TGA	4768	14041	14041	0	CGCGAGCTCAAUTGACTCGCGGGAACGCGAGTCAGTTGAGCTCGCGACACTCTTTCCCTTTTTTTTTT	25694.8
UDG_UG_f1CC_f2GCC	3875	11637	11637	0	CGCGAGCTCCCUGCCCTCGCGGGAACGCGAGGGCGGGGAGCTCGCGACACTCTTTCCCTTTTTTTTTT	21295.5
UDG_UG_f1TC_f2GTC	3266	9710	9710	0	CGCGAGCTCTCUGTCCTCGCGGGAACGCGAGGACGGAGAGCTCGCGACACTCTTTCCCTTTTTTTTTT	17769.1
UDG_UG_f1CC_f2CAA	2593	7687	7687	0	CGCGAGCTCCCUCAACTCGCGGGAACGCGAGTTGGGGGAGCTCGCGACACTCTTTCCCTTTTTTTTTT	14067.1
UDG_UG_f1AC_f2AGC	2764	7708	7708	0	CGCGAGCTCACUAGCCTCGCGGGAACGCGAGGCTGGTGAGCTCGCGACACTCTTTCCCTTTTTTTTTT	14105.5
UDG_UG_f1AA_f2GGT	2646	7668	7668	0	CGCGAGCTCAAUGGTCTCGCGGGAACGCGAGACCGTTGAGCTCGCGACACTCTTTCCCTTTTTTTTTT	14032.3
UDG_UG_f1CT_f2CGC	12719	38032	38032	0	CGCGAGCTCCTUCGCCTCGCGGGAACGCGAGGCGGAGGAGCTCGCGACACTCTTTCCCTTTTTTTTTT	32859.8
UDG_UG_f1GA_f2TGT	11459	35960	35960	0	CGCGAGCTCGAUTGTCTCGCGGGAACGCGAGACAGTCGAGCTCGCGACACTCTTTCCCTTTTTTTTTT	31069.6
UDG_UG_f1GT_f2ATT	21313	65074	64508	0	CGCGAGCTCGTUATTCTCGCGGGAACGCGAGAATGACGAGCTCGCGACACTCTTTCCCTTTTTTTTTT	55735.3
UDG_UG_f1TC_f2CGT	12935	43594	43594	0	CGCGAGCTCTCUCGTCTCGCGGGAACGCGAGACGGGAGAGCTCGCGACACTCTTTCCCTTTTTTTTTT	37665.4
UDG_UG_f1AG_f2TTT	13444	41315	41315	0	CGCGAGCTCAGUTTTCTCGCGGGAACGCGAGAAAGCTGAGCTCGCGACACTCTTTCCCTTTTTTTTTT	35696.4
UDG_UG_f1GT_f2ACT	14513	44494	44494	0	CGCGAGCTCGTUACTCTCGCGGGAACGCGAGAGTGACGAGCTCGCGACACTCTTTCCCTTTTTTTTTT	38443.1
UDG_UG_f1CG_f2ACT	21758	64232	65856	0	CGCGAGCTCCGUACTCTCGCGGGAACGCGAGAGTGCGGAGCTCGCGACACTCTTTCCCTTTTTTTTTT	56899.9
UDG_UG_f1TA_f2CAA	14281	43636	43636	0	CGCGAGCTCTAUCAACTCGCGGGAACGCGAGTTGGTAGAGCTCGCGACACTCTTTCCCTTTTTTTTTT	37701.7
UDG_UG_f1CC_f2CAC	10412	33346	33346	0	CGCGAGCTCCCUCACCTCGCGGGAACGCGAGGTGGGGGAGCTCGCGACACTCTTTCCCTTTTTTTTTT	29023.1
UDG_UG_f1CC_f2GTC	10607	34110	34110	0	CGCGAGCTCCCUGTCCTCGCGGGAACGCGAGGACGGGGAGCTCGCGACACTCTTTCCCTTTTTTTTTT	29751.5
UDG_UG_f1AT_f2CAC	13046	42593	42593	0	CGCGAGCTCATUCACCTCGCGGGAACGCGAGGTGGATGAGCTCGCGACACTCTTTCCCTTTTTTTTTT	37216.9
UDG_UG_f1CC_f2GAG	5686	17391	17391	0	CGCGAGCTCCCUGAGCTCGCGGGAACGCGAGCTCGGGGAGCTCGCGACACTCTTTCCCTTTTTTTTTT	15256.2
UDG_UG_f1AA_f2CTC	14554	47597	47597	0	CGCGAGCTCAAUCTCCTCGCGGGAACGCGAGGAGGTTGAGCTCGCGACACTCTTTCCCTTTTTTTTTT	41515.1
UDG_UG_f1AT_f2ACC	16660	53690	50415	0	CGCGAGCTCATUACCCTCGCGGGAACGCGAGGGTGATGAGCTCGCGACACTCTTTCCCTTTTTTTTTT	43879.3
UDG_UG_f1AC_f2CCT	9932	31689	31689	0	CGCGAGCTCACUCCTCTCGCGGGAACGCGAGAGGGGTGAGCTCGCGACACTCTTTCCCTTTTTTTTTT	27801
UDG_UG_f1GT_f2AAC	22108	64650	66916	0	CGCGAGCTCGTUAACCTCGCGGGAACGCGAGGTTGACGAGCTCGCGACACTCTTTCCCTTTTTTTTTT	58696.3
UDG_UG_f1GC_f2GCG	10533	33477	33477	0	CGCGAGCTCGCUGCGCTCGCGGGAACGCGAGCGCGGCGAGCTCGCGACACTCTTTCCCTTTTTTTTTT	29364.8
UDG_UG_f1AG_f2TCC	12093	39473	39473	0	CGCGAGCTCAGUTCCCTCGCGGGAACGCGAGGGAGCTGAGCTCGCGACACTCTTTCCCTTTTTTTTTT	34150.2
UDG_UG_f1AG_f2ATA	34422	65535	104213	0	CGCGAGCTCAGUATACTCGCGGGAACGCGAGTATGCTGAGCTCGCGACACTCTTTCCCTTTTTTTTTT	89196.3
UDG_UG_f1GT_f2TAT	14226	44676	44676	0	CGCGAGCTCGTUTATCTCGCGGGAACGCGAGATAGACGAGCTCGCGACACTCTTTCCCTTTTTTTTTT	38147.8
UDG_UG_f1TG_f2AAA	37408	65535	113257	0	CGCGAGCTCTGUAAACTCGCGGGAACGCGAGTTTGCAGAGCTCGCGACACTCTTTCCCTTTTTTTTTT	96170.5
UDG_UG_f1AC_f2GTC	15376	47993	47993	0	CGCGAGCTCACUGTCCTCGCGGGAACGCGAGGACGGTGAGCTCGCGACACTCTTTCCCTTTTTTTTTT	41077.4
UDG_UG_f1TC_f2TTT	13019	42353	42353	0	CGCGAGCTCTCUTTTCTCGCGGGAACGCGAGAAAGGAGAGCTCGCGACACTCTTTCCCTTTTTTTTTT	36300.3
UDG_UG_f1CT_f2CAC	12763	41030	41030	0	CGCGAGCTCCTUCACCTCGCGGGAACGCGAGGTGGAGGAGCTCGCGACACTCTTTCCCTTTTTTTTTT	35314.6
UDG_UG_f1AA_f2CTG	18007	58325	54495	0	CGCGAGCTCAAUCTGCTCGCGGGAACGCGAGCAGGTTGAGCTCGCGACACTCTTTCCCTTTTTTTTTT	46937.7
UDG_UG_f1GA_f2ATA	24640	65535	74585	0	CGCGAGCTCGAUATACTCGCGGGAACGCGAGTATGTCGAGCTCGCGACACTCTTTCCCTTTTTTTTTT	64241.6
UDG_UG_f1AC_f2CTA	11339	37277	37277	0	CGCGAGCTCACUCTACTCGCGGGAACGCGAGTAGGGTGAGCTCGCGACACTCTTTCCCTTTTTTTTTT	32158.2
UDG_random_6b_1	9333	30380	30380	0	CGCGAGCTCCATCTGCTCGCGGGAACGCGAGCAGATGGAGCTCGCGACACTCTTTCCCTTTTTTTTTT	26336.7
UDG_UG_f1CA_f2TCC	9771	30998	30998	0	CGCGAGCTCCAUTCCCTCGCGGGAACGCGAGGGAGTGGAGCTCGCGACACTCTTTCCCTTTTTTTTTT	27190.3
UDG_UG_f1CG_f2CGC	12877	39734	39734	0	CGCGAGCTCCGUCGCCTCGCGGGAACGCGAGGCGGCGGAGCTCGCGACACTCTTTCCCTTTTTTTTTT	34954.7
UDG_UG_f1AA_f2TGC	12237	40027	40027	0	CGCGAGCTCAAUTGCCTCGCGGGAACGCGAGGCAGTTGAGCTCGCGACACTCTTTCCCTTTTTTTTTT	35054.8
UDG_UG_f1TT_f2GGA	12210	39096	39096	0	CGCGAGCTCTTUGGACTCGCGGGAACGCGAGTCCGAAGAGCTCGCGACACTCTTTCCCTTTTTTTTTT	34887.5
UDG_UG_f1CG_f2CCG	11260	34170	34170	0	CGCGAGCTCCGUCCGCTCGCGGGAACGCGAGCGGGCGGAGCTCGCGACACTCTTTCCCTTTTTTTTTT	30760.7
UDG_UT_randomFlank	24480	65535	74100	0	CGCGAGCTCACUCTACGCGCGGGAACGCGCGTAGTGTGAGCTCGCGACACTCTTTCCCTTTTTTTTTT	66614.7
UDG_UG_f1AT_f2GTT	17226	55064	52130	0	CGCGAGCTCATUGTTCTCGCGGGAACGCGAGAACGATGAGCTCGCGACACTCTTTCCCTTTTTTTTTT	46687.8
UDG_UG_f1CA_f2TTA	12865	42766	42766	0	CGCGAGCTCCAUTTACTCGCGGGAACGCGAGTAAGTGGAGCTCGCGACACTCTTTCCCTTTTTTTTTT	38445.9
UDG_UG_f1GC_f2GGA	10631	33937	33937	0	CGCGAGCTCGCUGGACTCGCGGGAACGCGAGTCCGGCGAGCTCGCGACACTCTTTCCCTTTTTTTTTT	30394.1
UDG_UG_f1CT_f2GGG	11571	37676	37676	0	CGCGAGCTCCTUGGGCTCGCGGGAACGCGAGCCCGAGGAGCTCGCGACACTCTTTCCCTTTTTTTTTT	33870.1
UDG_UG_f1TT_f2GTC	16775	55183	50764	0	CGCGAGCTCTTUGTCCTCGCGGGAACGCGAGGACGAAGAGCTCGCGACACTCTTTCCCTTTTTTTTTT	45940.6
UDG_UG_f1AC_f2GGT	10118	31835	31835	0	CGCGAGCTCACUGGTCTCGCGGGAACGCGAGACCGGTGAGCTCGCGACACTCTTTCCCTTTTTTTTTT	28810.2
UDG_UG_f1GG_f2ACA	16938	51580	51257	0	CGCGAGCTCGGUACACTCGCGGGAACGCGAGTGTGCCGAGCTCGCGACACTCTTTCCCTTTTTTTTTT	47091.1
UDG_UG_f1AG_f2GGC	12856	41051	41051	0	CGCGAGCTCAGUGGCCTCGCGGGAACGCGAGGCCGCTGAGCTCGCGACACTCTTTCCCTTTTTTTTTT	38565.3
UDG_UG_f1GC_f2TGT	10279	33676	33676	0	CGCGAGCTCGCUTGTCTCGCGGGAACGCGAGACAGGCGAGCTCGCGACACTCTTTCCCTTTTTTTTTT	32176.3
UDG_UG_f1CA_f2GTA	15767	51654	47710	0	CGCGAGCTCCAUGTACTCGCGGGAACGCGAGTACGTGGAGCTCGCGACACTCTTTCCCTTTTTTTTTT	45832.9
UDG_UG_f1AT_f2AGG	12294	37837	37837	0	CGCGAGCTCATUAGGCTCGCGGGAACGCGAGCCTGATGAGCTCGCGACACTCTTTCCCTTTTTTTTTT	36791.7
UDG_UG_f1CT_f2GGT	11175	33636	33636	0	CGCGAGCTCCTUGGTCTCGCGGGAACGCGAGACCGAGGAGCTCGCGACACTCTTTCCCTTTTTTTTTT	33025.7
UDG_UG_f1AG_f2ACC	14588	45645	45645	0	CGCGAGCTCAGUACCCTCGCGGGAACGCGAGGGTGCTGAGCTCGCGACACTCTTTCCCTTTTTTTTTT	45471.8
UDG_UG_f1GC_f2GCC	9541	28741	28741	0	CGCGAGCTCGCUGCCCTCGCGGGAACGCGAGGGCGGCGAGCTCGCGACACTCTTTCCCTTTTTTTTTT	28631.9
UDG_UG_f1TC_f2GTG	9607	30611	30611	0	CGCGAGCTCTCUGTGCTCGCGGGAACGCGAGCACGGAGAGCTCGCGACACTCTTTCCCTTTTTTTTTT	32227.6
UDG_UG_f1TA_f2ATC	14185	43086	43086	0	CGCGAGCTCTAUATCCTCGCGGGAACGCGAGGATGTAGAGCTCGCGACACTCTTTCCCTTTTTTTTTT	46456.7
UDG_UG_f1AC_f2GTT	10328	30916	30916	0	CGCGAGCTCACUGTTCTCGCGGGAACGCGAGAACGGTGAGCTCGCGACACTCTTTCCCTTTTTTTTTT	34146.3
UDG_UG_f1AT_f2CAA	11816	37595	37595	0	CGCGAGCTCATUCAACTCGCGGGAACGCGAGTTGGATGAGCTCGCGACACTCTTTCCCTTTTTTTTTT	42338.8
UDG_UG_f1TA_f2GGT	8834	27430	27430	0	CGCGAGCTCTAUGGTCTCGCGGGAACGCGAGACCGTAGAGCTCGCGACACTCTTTCCCTTTTTTTTTT	31365.6
UDG_UG_f1GG_f2CAG	8931	27258	27258	0	CGCGAGCTCGGUCAGCTCGCGGGAACGCGAGCTGGCCGAGCTCGCGACACTCTTTCCCTTTTTTTTTT	31242
UDG_UG_f1TG_f2TGC	8553	27525	27525	0	CGCGAGCTCTGUTGCCTCGCGGGAACGCGAGGCAGCAGAGCTCGCGACACTCTTTCCCTTTTTTTTTT	32063.4
UDG_UG_f1GC_f2CTA	9393	29662	29662	0	CGCGAGCTCGCUCTACTCGCGGGAACGCGAGTAGGGCGAGCTCGCGACACTCTTTCCCTTTTTTTTTT	35191.7
UDG_MM_CA	8090	24744	24744	0	CGCGAGCTCACCCTTACCGCGGGAACGCGGTAAGAGTGAGCTCGCGACACTCTTTCCCTTTTTTTTTT	29513.3
UDG_UG_f1TT_f2TGG	7211	22356	22356	0	CGCGAGCTCTTUTGGCTCGCGGGAACGCGAGCCAGAAGAGCTCGCGACACTCTTTCCCTTTTTTTTTT	27181.7
UDG_UG_f1AG_f2GGT	9534	29710	29710	0	CGCGAGCTCAGUGGTCTCGCGGGAACGCGAGACCGCTGAGCTCGCGACACTCTTTCCCTTTTTTTTTT	37298.6
UDG_UG_f1CT_f2GGC	8076	24705	24705	0	CGCGAGCTCCTUGGCCTCGCGGGAACGCGAGGCCGAGGAGCTCGCGACACTCTTTCCCTTTTTTTTTT	32095.5
UDG_UG_f1GA_f2TAT	9507	30450	30450	0	CGCGAGCTCGAUTATCTCGCGGGAACGCGAGATAGTCGAGCTCGCGACACTCTTTCCCTTTTTTTTTT	41098.4
UDG_UG_f1AT_f2CTC	11329	34762	34762	0	CGCGAGCTCATUCTCCTCGCGGGAACGCGAGGAGGATGAGCTCGCGACACTCTTTCCCTTTTTTTTTT	48537.1
UDG_UG_f1AA_f2GGC	8992	27207	27207	0	CGCGAGCTCAAUGGCCTCGCGGGAACGCGAGGCCGTTGAGCTCGCGACACTCTTTCCCTTTTTTTTTT	39612.5
UDG_UG_f1AT_f2TCC	7181	22325	22325	0	CGCGAGCTCATUTCCCTCGCGGGAACGCGAGGGAGATGAGCTCGCGACACTCTTTCCCTTTTTTTTTT	33047.2
UDG_UG_f1AG_f2CCA	8800	27339	27339	0	CGCGAGCTCAGUCCACTCGCGGGAACGCGAGTGGGCTGAGCTCGCGACACTCTTTCCCTTTTTTTTTT	42896.4
UDG_UG_f1AG_f2GGA	7480	23118	23118	0	CGCGAGCTCAGUGGACTCGCGGGAACGCGAGTCCGCTGAGCTCGCGACACTCTTTCCCTTTTTTTTTT	37943.2
UDG_UG_f1TT_f2CGC	7278	22716	22716	0	CGCGAGCTCTTUCGCCTCGCGGGAACGCGAGGCGGAAGAGCTCGCGACACTCTTTCCCTTTTTTTTTT	38986.9
UDG_UG_f1TT_f2AGG	7696	24040	24040	0	CGCGAGCTCTTUAGGCTCGCGGGAACGCGAGCCTGAAGAGCTCGCGACACTCTTTCCCTTTTTTTTTT	43999.3
UDG_UG_f1TT_f2AAA	9417	28503	28503	0	CGCGAGCTCTTUAAACTCGCGGGAACGCGAGTTTGAAGAGCTCGCGACACTCTTTCCCTTTTTTTTTT	52167.7
UDG_UG_f1TG_f2ACC	8295	25167	25167	0	CGCGAGCTCTGUACCCTCGCGGGAACGCGAGGGTGCAGAGCTCGCGACACTCTTTCCCTTTTTTTTTT	46062
UDG_UG_f1GC_f2CCA	3663	10955	10955	0	CGCGAGCTCGCUCCACTCGCGGGAACGCGAGTGGGGCGAGCTCGCGACACTCTTTCCCTTTTTTTTTT	20050.4
UDG_UG_f1TA_f2ACG	4589	13635	13635	0	CGCGAGCTCTAUACGCTCGCGGGAACGCGAGCGTGTAGAGCTCGCGACACTCTTTCCCTTTTTTTTTT	24955.5
UDG_UG_f1CT_f2GTG	4053	11833	11833	0	CGCGAGCTCCTUGTGCTCGCGGGAACGCGAGCACGAGGAGCTCGCGACACTCTTTCCCTTTTTTTTTT	21657.4
UDG_UG_f1TG_f2CGC	2587	7621	7621	0	CGCGAGCTCTGUCGCCTCGCGGGAACGCGAGGCGGCAGAGCTCGCGACACTCTTTCCCTTTTTTTTTT	13948.4
UDG_UG_f1AT_f2CCT	2677	8025	8025	0	CGCGAGCTCATUCCTCTCGCGGGAACGCGAGAGGGATGAGCTCGCGACACTCTTTCCCTTTTTTTTTT	14687.8
UDG_UG_f1CG_f2CGA	13158	40436	40436	0	CGCGAGCTCCGUCGACTCGCGGGAACGCGAGTCGGCGGAGCTCGCGACACTCTTTCCCTTTTTTTTTT	34845.3
UDG_UG_f1GA_f2CAG	11635	35571	35571	0	CGCGAGCTCGAUCAGCTCGCGGGAACGCGAGCTGGTCGAGCTCGCGACACTCTTTCCCTTTTTTTTTT	30653
UDG_UG_f1CA_f2TCA	11297	35958	35958	0	CGCGAGCTCCAUTCACTCGCGGGAACGCGAGTGAGTGGAGCTCGCGACACTCTTTCCCTTTTTTTTTT	30986.5
UDG_UG_f1AA_f2CCG	13305	41662	41662	0	CGCGAGCTCAAUCCGCTCGCGGGAACGCGAGCGGGTTGAGCTCGCGACACTCTTTCCCTTTTTTTTTT	35901.8
UDG_UG_f1CG_f2AGG	18062	55370	54662	0	CGCGAGCTCCGUAGGCTCGCGGGAACGCGAGCCTGCGGAGCTCGCGACACTCTTTCCCTTTTTTTTTT	47104.5
UDG_UG_f1AC_f2GTG	14295	43427	43427	0	CGCGAGCTCACUGTGCTCGCGGGAACGCGAGCACGGTGAGCTCGCGACACTCTTTCCCTTTTTTTTTT	37422.8
UDG_UG_f1TA_f2GCA	15302	47899	47899	0	CGCGAGCTCTAUGCACTCGCGGGAACGCGAGTGCGTAGAGCTCGCGACACTCTTTCCCTTTTTTTTTT	41276.5
UDG_UG_f1AC_f2TGG	11340	36610	36610	0	CGCGAGCTCACUTGGCTCGCGGGAACGCGAGCCAGGTGAGCTCGCGACACTCTTTCCCTTTTTTTTTT	31548.3
UDG_UG_f1TA_f2ACT	14732	49161	49161	0	CGCGAGCTCTAUACTCTCGCGGGAACGCGAGAGTGTAGAGCTCGCGACACTCTTTCCCTTTTTTTTTT	42475.4
UDG_UG_f1AA_f2TCG	14035	44957	44957	0	CGCGAGCTCAAUTCGCTCGCGGGAACGCGAGCGAGTTGAGCTCGCGACACTCTTTCCCTTTTTTTTTT	38914.6
UDG_UG_f1GG_f2CGA	10585	33444	33444	0	CGCGAGCTCGGUCGACTCGCGGGAACGCGAGTCGGCCGAGCTCGCGACACTCTTTCCCTTTTTTTTTT	29170.6
UDG_UG_f1TC_f2GTG	10447	33564	33564	0	CGCGAGCTCTCUGTGCTCGCGGGAACGCGAGCACGGAGAGCTCGCGACACTCTTTCCCTTTTTTTTTT	29269
UDG_UG_f1CG_f2TTA	14146	46495	46495	0	CGCGAGCTCCGUTTACTCGCGGGAACGCGAGTAAGCGGAGCTCGCGACACTCTTTCCCTTTTTTTTTT	40171.9
UDG_UG_f1TG_f2AAC	33381	65535	101060	0	CGCGAGCTCTGUAACCTCGCGGGAACGCGAGGTTGCAGAGCTCGCGACACTCTTTCCCTTTTTTTTTT	86292.9
UDG_UG_f1CT_f2TTG	14119	45483	45483	0	CGCGAGCTCCTUTTGCTCGCGGGAACGCGAGCAAGAGGAGCTCGCGACACTCTTTCCCTTTTTTTTTT	39349.7
UDG_random_6b_9	10825	35817	35817	0	CGCGAGCTCGATATACTCGCGGGAACGCGAGTATATCGAGCTCGCGACACTCTTTCCCTTTTTTTTTT	31240.3
UDG_UG_f1CT_f2GTA	16917	55907	51194	0	CGCGAGCTCCTUGTACTCGCGGGAACGCGAGTACGAGGAGCTCGCGACACTCTTTCCCTTTTTTTTTT	44707.1
UDG_UG_f1GT_f2TGG	10038	31901	31901	0	CGCGAGCTCGTUTGGCTCGCGGGAACGCGAGCCAGACGAGCTCGCGACACTCTTTCCCTTTTTTTTTT	27599.2
UDG_UG_f1GT_f2AAG	17105	50746	51763	0	CGCGAGCTCGTUAAGCTCGCGGGAACGCGAGCTTGACGAGCTCGCGACACTCTTTCCCTTTTTTTTTT	44365.5
UDG_UG_f1CA_f2TCC	12339	37499	37499	0	CGCGAGCTCCAUTCCCTCGCGGGAACGCGAGGGAGTGGAGCTCGCGACACTCTTTCCCTTTTTTTTTT	32095.5
UDG_UG_f1GG_f2ATT	31103	65535	94160	0	CGCGAGCTCGGUATTCTCGCGGGAACGCGAGAATGCCGAGCTCGCGACACTCTTTCCCTTTTTTTTTT	80452.9
UDG_UG_f1GG_f2TCT	11903	37929	37929	0	CGCGAGCTCGGUTCTCTCGCGGGAACGCGAGAGAGCCGAGCTCGCGACACTCTTTCCCTTTTTTTTTT	32508.5
UDG_UG_f1TG_f2TGA	11952	38914	38914	0	CGCGAGCTCTGUTGACTCGCGGGAACGCGAGTCAGCAGAGCTCGCGACACTCTTTCCCTTTTTTTTTT	33493.4
UDG_UG_f1GC_f2TTT	11719	38031	38031	0	CGCGAGCTCGCUTTTCTCGCGGGAACGCGAGAAAGGCGAGCTCGCGACACTCTTTCCCTTTTTTTTTT	32808.6
UDG_UG_f1CC_f2GCC	9641	29679	29679	0	CGCGAGCTCCCUGCCCTCGCGGGAACGCGAGGGCGGGGAGCTCGCGACACTCTTTCCCTTTTTTTTTT	25729
UDG_UG_f1GT_f2GAT	12976	40807	40807	0	CGCGAGCTCGTUGATCTCGCGGGAACGCGAGATCGACGAGCTCGCGACACTCTTTCCCTTTTTTTTTT	35375.9
UDG_UG_f1GG_f2TAA	13408	43480	43480	0	CGCGAGCTCGGUTAACTCGCGGGAACGCGAGTTAGCCGAGCTCGCGACACTCTTTCCCTTTTTTTTTT	38043
UDG_UG_f1TT_f2GAT	13697	44223	44223	0	CGCGAGCTCTTUGATCTCGCGGGAACGCGAGATCGAAGAGCTCGCGACACTCTTTCCCTTTTTTTTTT	38790.8
UDG_UG_f1AT_f2AGA	14736	47684	47684	0	CGCGAGCTCATUAGACTCGCGGGAACGCGAGTCTGATGAGCTCGCGACACTCTTTCCCTTTTTTTTTT	42583.8
UDG_UG_f1TT_f2GCA	13230	41266	41266	0	CGCGAGCTCTTUGCACTCGCGGGAACGCGAGTGCGAAGAGCTCGCGACACTCTTTCCCTTTTTTTTTT	36945.5
UDG_UG_f1GA_f2TGT	12839	41495	41495	0	CGCGAGCTCGAUTGTCTCGCGGGAACGCGAGACAGTCGAGCTCGCGACACTCTTTCCCTTTTTTTTTT	37056.7
UDG_UG_f1TT_f2TCC	11672	38105	38105	0	CGCGAGCTCTTUTCCCTCGCGGGAACGCGAGGGAGAAGAGCTCGCGACACTCTTTCCCTTTTTTTTTT	34255.8
UDG_UG_f1AT_f2TTA	14712	48052	48052	0	CGCGAGCTCATUTTACTCGCGGGAACGCGAGTAAGATGAGCTCGCGACACTCTTTCCCTTTTTTTTTT	43674.6
UDG_UG_f1CA_f2GAG	10359	33321	33321	0	CGCGAGCTCCAUGAGCTCGCGGGAACGCGAGCTCGTGGAGCTCGCGACACTCTTTCCCTTTTTTTTTT	29998.6
UDG_UG_f1GT_f2GTG	16477	53849	49861	0	CGCGAGCTCGTUGTGCTCGCGGGAACGCGAGCACGACGAGCTCGCGACACTCTTTCCCTTTTTTTTTT	44886.1
UDG_UG_f1GT_f2GCC	11377	37112	37112	0	CGCGAGCTCGTUGCCCTCGCGGGAACGCGAGGGCGACGAGCTCGCGACACTCTTTCCCTTTTTTTTTT	33390.6
UDG_UG_f1GT_f2GCA	12859	39085	39085	0	CGCGAGCTCGTUGCACTCGCGGGAACGCGAGTGCGACGAGCTCGCGACACTCTTTCCCTTTTTTTTTT	35136.8
UDG_UG_f1GT_f2TCT	11137	37212	37212	0	CGCGAGCTCGTUTCTCTCGCGGGAACGCGAGAGAGACGAGCTCGCGACACTCTTTCCCTTTTTTTTTT	33499.2
UDG_UG_f1TT_f2GGG	11854	38206	38206	0	CGCGAGCTCTTUGGGCTCGCGGGAACGCGAGCCCGAAGAGCTCGCGACACTCTTTCCCTTTTTTTTTT	34570.8
UDG_UG_f1GG_f2GTT	17552	55790	53117	0	CGCGAGCTCGGUGTTCTCGCGGGAACGCGAGAACGCCGAGCTCGCGACACTCTTTCCCTTTTTTTTTT	48063
UDG_UG_f1CC_f2AAC	15418	47884	47884	0	CGCGAGCTCCCUAACCTCGCGGGAACGCGAGGTTGGGGAGCTCGCGACACTCTTTCCCTTTTTTTTTT	43876.1
UDG_UG_f1GA_f2TTA	14720	47487	47487	0	CGCGAGCTCGAUTTACTCGCGGGAACGCGAGTAAGTCGAGCTCGCGACACTCTTTCCCTTTTTTTTTT	43824.8
UDG_UG_f1TG_f2GGA	12916	41083	41083	0	CGCGAGCTCTGUGGACTCGCGGGAACGCGAGTCCGCAGAGCTCGCGACACTCTTTCCCTTTTTTTTTT	39049.6
UDG_UG_f1CT_f2CGT	11338	36880	36880	0	CGCGAGCTCCTUCGTCTCGCGGGAACGCGAGACGGAGGAGCTCGCGACACTCTTTCCCTTTTTTTTTT	35310.3
UDG_UG_f1TA_f2ACG	10982	35077	35077	0	CGCGAGCTCTAUACGCTCGCGGGAACGCGAGCGTGTAGAGCTCGCGACACTCTTTCCCTTTTTTTTTT	33856.3
UDG_UG_f1TC_f2GGT	8841	26299	26299	0	CGCGAGCTCTCUGGTCTCGCGGGAACGCGAGACCGGAGAGCTCGCGACACTCTTTCCCTTTTTTTTTT	25636.2
UDG_UG_f1AG_f2CGT	10273	33194	33194	0	CGCGAGCTCAGUCGTCTCGCGGGAACGCGAGACGGCTGAGCTCGCGACACTCTTTCCCTTTTTTTTTT	33068
UDG_UG_f1CC_f2TAC	8580	27136	27136	0	CGCGAGCTCCCUTACCTCGCGGGAACGCGAGGTAGGGGAGCTCGCGACACTCTTTCCCTTTTTTTTTT	27248.6
UDG_UG_f1GC_f2CGC	9403	28907	28907	0	CGCGAGCTCGCUCGCCTCGCGGGAACGCGAGGCGGGCGAGCTCGCGACACTCTTTCCCTTTTTTTTTT	30305.6
UDG_UG_f1GA_f2CTA	12236	37292	37292	0	CGCGAGCTCGAUCTACTCGCGGGAACGCGAGTAGGTCGAGCTCGCGACACTCTTTCCCTTTTTTTTTT	39980.9
UDG_UG_f1GC_f2AGG	11971	35235	35235	0	CGCGAGCTCGCUAGGCTCGCGGGAACGCGAGCCTGGCGAGCTCGCGACACTCTTTCCCTTTTTTTTTT	38916.6
UDG_UG_f1CT_f2CTG	17057	52558	51618	0	CGCGAGCTCCTUCTGCTCGCGGGAACGCGAGCAGGAGGAGCTCGCGACACTCTTTCCCTTTTTTTTTT	58052.1
UDG_UG_f1CA_f2AAC	14760	46054	46054	0	CGCGAGCTCCAUAACCTCGCGGGAACGCGAGGTTGTGGAGCTCGCGACACTCTTTCCCTTTTTTTTTT	52621.3
UDG_UG_f1TT_f2TTG	10400	32508	32508	0	CGCGAGCTCTTUTTGCTCGCGGGAACGCGAGCAAGAAGAGCTCGCGACACTCTTTCCCTTTTTTTTTT	37172.2
UDG_UG_f1GG_f2ATG	22634	65535	68509	0	CGCGAGCTCGGUATGCTCGCGGGAACGCGAGCATGCCGAGCTCGCGACACTCTTTCCCTTTTTTTTTT	79677.7
UDG_UG_f1CG_f2CGT	11404	34652	34652	0	CGCGAGCTCCGUCGTCTCGCGGGAACGCGAGACGGCGGAGCTCGCGACACTCTTTCCCTTTTTTTTTT	40821.3
UDG_UG_f1AG_f2ATT	16389	50383	49594	0	CGCGAGCTCAGUATTCTCGCGGGAACGCGAGAATGCTGAGCTCGCGACACTCTTTCCCTTTTTTTTTT	58901.6
UDG_UG_f1AC_f2GCT	8281	24971	24971	0	CGCGAGCTCACUGCTCTCGCGGGAACGCGAGAGCGGTGAGCTCGCGACACTCTTTCCCTTTTTTTTTT	30276.9
UDG_UG_f1CA_f2GGC	9401	29592	29592	0	CGCGAGCTCCAUGGCCTCGCGGGAACGCGAGGCCGTGGAGCTCGCGACACTCTTTCCCTTTTTTTTTT	37002.9
UDG_UG_f1TA_f2AGA	10091	31249	31249	0	CGCGAGCTCTAUAGACTCGCGGGAACGCGAGTCTGTAGAGCTCGCGACACTCTTTCCCTTTTTTTTTT	39747.9
UDG_UG_f1GC_f2TGC	9624	29904	29904	0	CGCGAGCTCGCUTGCCTCGCGGGAACGCGAGGCAGGCGAGCTCGCGACACTCTTTCCCTTTTTTTTTT	39236.7
UDG_UG_f1AG_f2CGC	8777	26415	26415	0	CGCGAGCTCAGUCGCCTCGCGGGAACGCGAGGCGGCTGAGCTCGCGACACTCTTTCCCTTTTTTTTTT	36226.2
UDG_UG_f1GG_f2AAC	15185	46898	46898	0	CGCGAGCTCGGUAACCTCGCGGGAACGCGAGGTTGCCGAGCTCGCGACACTCTTTCCCTTTTTTTTTT	66575.6
UDG_UG_f1GG_f2CGA	7565	23231	23231	0	CGCGAGCTCGGUCGACTCGCGGGAACGCGAGTCGGCCGAGCTCGCGACACTCTTTCCCTTTTTTTTTT	33954
UDG_UG_f1GC_f2AGT	7872	24338	24338	0	CGCGAGCTCGCUAGTCTCGCGGGAACGCGAGACTGGCGAGCTCGCGACACTCTTTCCCTTTTTTTTTT	36479
UDG_UG_f1GG_f2TGA	6951	21365	21365	0	CGCGAGCTCGGUTGACTCGCGGGAACGCGAGTCAGCCGAGCTCGCGACACTCTTTCCCTTTTTTTTTT	34430.2
UDG_UG_f1CC_f2GTC	5621	17242	17242	0	CGCGAGCTCCCUGTCCTCGCGGGAACGCGAGGACGGGGAGCTCGCGACACTCTTTCCCTTTTTTTTTT	28976.2
UDG_UG_f1AG_f2CTG	6385	19420	19420	0	CGCGAGCTCAGUCTGCTCGCGGGAACGCGAGCAGGCTGAGCTCGCGACACTCTTTCCCTTTTTTTTTT	34409.4
UDG_UG_f1GT_f2CTT	6278	19637	19637	0	CGCGAGCTCGTUCTTCTCGCGGGAACGCGAGAAGGACGAGCTCGCGACACTCTTTCCCTTTTTTTTTT	34793.9
UDG_UG_f1CT_f2GAA	4330	13216	13216	0	CGCGAGCTCCTUGAACTCGCGGGAACGCGAGTTCGAGGAGCTCGCGACACTCTTTCCCTTTTTTTTTT	23416.8
UDG_UG_f1AG_f2TGG	3549	10583	10583	0	CGCGAGCTCAGUTGGCTCGCGGGAACGCGAGCCAGCTGAGCTCGCGACACTCTTTCCCTTTTTTTTTT	18751.5
UDG_UG_f1GT_f2GGT	3678	11007	11007	0	CGCGAGCTCGTUGGTCTCGCGGGAACGCGAGACCGACGAGCTCGCGACACTCTTTCCCTTTTTTTTTT	19502.8
UDG_UG_f1TC_f2GAG	2428	7376	7376	0	CGCGAGCTCTCUGAGCTCGCGGGAACGCGAGCTCGGAGAGCTCGCGACACTCTTTCCCTTTTTTTTTT	13069.2
UDG_random_6b_1	2167	6200	6200	0	CGCGAGCTCCATCTGCTCGCGGGAACGCGAGCAGATGGAGCTCGCGACACTCTTTCCCTTTTTTTTTT	10985.5
UDG_UG_f1TA_f2CGC	2290	6877	6877	0	CGCGAGCTCTAUCGCCTCGCGGGAACGCGAGGCGGTAGAGCTCGCGACACTCTTTCCCTTTTTTTTTT	12185.1
UDG_UG_f1GA_f2CGG	12714	40006	40006	0	CGCGAGCTCGAUCGGCTCGCGGGAACGCGAGCCGGTCGAGCTCGCGACACTCTTTCCCTTTTTTTTTT	34092.8
UDG_UG_f1AT_f2GAG	12826	39470	39470	0	CGCGAGCTCATUGAGCTCGCGGGAACGCGAGCTCGATGAGCTCGCGACACTCTTTCCCTTTTTTTTTT	33636.1
UDG_UG_f1CT_f2ATC	20660	62996	62530	0	CGCGAGCTCCTUATCCTCGCGGGAACGCGAGGATGAGGAGCTCGCGACACTCTTTCCCTTTTTTTTTT	53287.6
UDG_UG_f1AC_f2CGC	13557	43111	43111	0	CGCGAGCTCACUCGCCTCGCGGGAACGCGAGGCGGGTGAGCTCGCGACACTCTTTCCCTTTTTTTTTT	36738.9
UDG_UG_f1GG_f2AGG	18033	54281	54574	0	CGCGAGCTCGGUAGGCTCGCGGGAACGCGAGCCTGCCGAGCTCGCGACACTCTTTCCCTTTTTTTTTT	46507.6
UDG_UG_f1TT_f2CTG	18998	58914	57497	0	CGCGAGCTCTTUCTGCTCGCGGGAACGCGAGCAGGAAGAGCTCGCGACACTCTTTCCCTTTTTTTTTT	48998.5
UDG_UG_f1TA_f2GCA	14881	46380	46380	0	CGCGAGCTCTAUGCACTCGCGGGAACGCGAGTGCGTAGAGCTCGCGACACTCTTTCCCTTTTTTTTTT	39524.7
UDG_UG_f1AA_f2CAC	16376	53292	49555	0	CGCGAGCTCAAUCACCTCGCGGGAACGCGAGGTGGTTGAGCTCGCGACACTCTTTCCCTTTTTTTTTT	42230.4
UDG_UG_f1GG_f2ACA	21479	65535	65011	0	CGCGAGCTCGGUACACTCGCGGGAACGCGAGTGTGCCGAGCTCGCGACACTCTTTCCCTTTTTTTTTT	55615
UDG_UG_f1TA_f2TTT	14053	45987	45987	0	CGCGAGCTCTAUTTTCTCGCGGGAACGCGAGAAAGTAGAGCTCGCGACACTCTTTCCCTTTTTTTTTT	39568.3
UDG_UG_f1CA_f2CCT	8979	27360	27360	0	CGCGAGCTCCAUCCTCTCGCGGGAACGCGAGAGGGTGGAGCTCGCGACACTCTTTCCCTTTTTTTTTT	23682.7
UDG_UG_f1AA_f2GTA	18012	60182	54510	0	CGCGAGCTCAAUGTACTCGCGGGAACGCGAGTACGTTGAGCTCGCGACACTCTTTCCCTTTTTTTTTT	47335.8
UDG_UG_f1GA_f2TAG	12198	40046	40046	0	CGCGAGCTCGAUTAGCTCGCGGGAACGCGAGCTAGTCGAGCTCGCGACACTCTTTCCCTTTTTTTTTT	34600
UDG_UG_f1AA_f2GGG	13853	45241	45241	0	CGCGAGCTCAAUGGGCTCGCGGGAACGCGAGCCCGTTGAGCTCGCGACACTCTTTCCCTTTTTTTTTT	38630.3
UDG_UG_f1AG_f2TAC	11839	37756	37756	0	CGCGAGCTCAGUTACCTCGCGGGAACGCGAGGTAGCTGAGCTCGCGACACTCTTTCCCTTTTTTTTTT	32610.8
UDG_UG_f1CG_f2AAT	37500	65535	113536	0	CGCGAGCTCCGUAATCTCGCGGGAACGCGAGATTGCGGAGCTCGCGACACTCTTTCCCTTTTTTTTTT	98817.3
UDG_UG_f1CG_f2TCT	10545	34809	34809	0	CGCGAGCTCCGUTCTCTCGCGGGAACGCGAGAGAGCGGAGCTCGCGACACTCTTTCCCTTTTTTTTTT	30359
UDG_UG_f1GC_f2ACC	10422	32015	32015	0	CGCGAGCTCGCUACCCTCGCGGGAACGCGAGGGTGGCGAGCTCGCGACACTCTTTCCCTTTTTTTTTT	27546.5
UDG_UG_f1TT_f2TCA	11053	33156	33156	0	CGCGAGCTCTTUTCACTCGCGGGAACGCGAGTGAGAAGAGCTCGCGACACTCTTTCCCTTTTTTTTTT	28311.2
UDG_UG_f1CC_f2GTA	17890	57281	54141	0	CGCGAGCTCCCUGTACTCGCGGGAACGCGAGTACGGGGAGCTCGCGACACTCTTTCCCTTTTTTTTTT	46259.5
UDG_UG_f1CC_f2AGG	16453	52354	49788	0	CGCGAGCTCCCUAGGCTCGCGGGAACGCGAGCCTGGGGAGCTCGCGACACTCTTTCCCTTTTTTTTTT	42512.9
UDG_UG_f1TC_f2TCT	12141	39322	39322	0	CGCGAGCTCTCUTCTCTCGCGGGAACGCGAGAGAGGAGAGCTCGCGACACTCTTTCCCTTTTTTTTTT	33922.3
UDG_UG_f1TG_f2CTT	14477	44689	44689	0	CGCGAGCTCTGUCTTCTCGCGGGAACGCGAGAAGGCAGAGCTCGCGACACTCTTTCCCTTTTTTTTTT	38552.4
UDG_UG_f1CC_f2TCC	9755	32451	32451	0	CGCGAGCTCCCUTCCCTCGCGGGAACGCGAGGGAGGGGAGCTCGCGACACTCTTTCCCTTTTTTTTTT	28339
UDG_UG_f1AA_f2TTG	17093	56549	51727	0	CGCGAGCTCAAUTTGCTCGCGGGAACGCGAGCAAGTTGAGCTCGCGACACTCTTTCCCTTTTTTTTTT	45258.7
UDG_UG_f1CT_f2TGG	10678	34029	34029	0	CGCGAGCTCCTUTGGCTCGCGGGAACGCGAGCCAGAGGAGCTCGCGACACTCTTTCCCTTTTTTTTTT	29719.9
UDG_UG_f1CG_f2TCT	12450	39348	39348	0	CGCGAGCTCCGUTCTCTCGCGGGAACGCGAGAGAGCGGAGCTCGCGACACTCTTTCCCTTTTTTTTTT	34427.6
UDG_UG_f1TC_f2TAG	12983	40855	40855	0	CGCGAGCTCTCUTAGCTCGCGGGAACGCGAGCTAGGAGAGCTCGCGACACTCTTTCCCTTTTTTTTTT	35779.9
UDG_UG_f1GG_f2ACC	19481	59479	58959	0	CGCGAGCTCGGUACCCTCGCGGGAACGCGAGGGTGCCGAGCTCGCGACACTCTTTCCCTTTTTTTTTT	52652.8
UDG_UG_f1AA_f2GTG	19149	60066	57954	0	CGCGAGCTCAAUGTGCTCGCGGGAACGCGAGCACGTTGAGCTCGCGACACTCTTTCCCTTTTTTTTTT	51796.4
UDG_UG_f1TC_f2TCC	11028	36156	36156	0	CGCGAGCTCTCUTCCCTCGCGGGAACGCGAGGGAGGAGAGCTCGCGACACTCTTTCCCTTTTTTTTTT	32264
UDG_UG_f1AA_f2TAT	14625	48970	48970	0	CGCGAGCTCAAUTATCTCGCGGGAACGCGAGATAGTTGAGCTCGCGACACTCTTTCCCTTTTTTTTTT	44023.2
UDG_UG_f1GT_f2ACC	13970	45299	45299	0	CGCGAGCTCGTUACCCTCGCGGGAACGCGAGGGTGACGAGCTCGCGACACTCTTTCCCTTTTTTTTTT	40782.3
UDG_UG_f1AC_f2GTT	13004	40544	40544	0	CGCGAGCTCACUGTTCTCGCGGGAACGCGAGAACGGTGAGCTCGCGACACTCTTTCCCTTTTTTTTTT	36500.5
UDG_UG_f1TT_f2GTT	15613	48952	48952	0	CGCGAGCTCTTUGTTCTCGCGGGAACGCGAGAACGAAGAGCTCGCGACACTCTTTCCCTTTTTTTTTT	44043.3
UDG_UG_f1CG_f2CAA	12875	41268	41268	0	CGCGAGCTCCGUCAACTCGCGGGAACGCGAGTTGGCGGAGCTCGCGACACTCTTTCCCTTTTTTTTTT	37099.3
UDG_UG_f1CG_f2CAA	12448	38882	38882	0	CGCGAGCTCCGUCAACTCGCGGGAACGCGAGTTGGCGGAGCTCGCGACACTCTTTCCCTTTTTTTTTT	34811.1
UDG_UG_f1CT_f2TCG	10894	35238	35238	0	CGCGAGCTCCTUTCGCTCGCGGGAACGCGAGCGAGAGGAGCTCGCGACACTCTTTCCCTTTTTTTTTT	31593.5
UDG_UG_f1GA_f2GCA	12603	40035	40035	0	CGCGAGCTCGAUGCACTCGCGGGAACGCGAGTGCGTCGAGCTCGCGACACTCTTTCCCTTTTTTTTTT	36020.4
UDG_UG_f1GC_f2CTC	14563	48699	48699	0	CGCGAGCTCGCUCTCCTCGCGGGAACGCGAGGAGGGCGAGCTCGCGACACTCTTTCCCTTTTTTTTTT	43815.7
UDG_UG_f1TG_f2CGT	17585	57573	53217	0	CGCGAGCTCTGUCGTCTCGCGGGAACGCGAGACGGCAGAGCTCGCGACACTCTTTCCCTTTTTTTTTT	48507.9
UDG_UG_f1GT_f2ATA	21084	64999	63815	0	CGCGAGCTCGTUATACTCGCGGGAACGCGAGTATGACGAGCTCGCGACACTCTTTCCCTTTTTTTTTT	58632.8
UDG_UG_f1TT_f2ACG	14557	45252	45252	0	CGCGAGCTCTTUACGCTCGCGGGAACGCGAGCGTGAAGAGCTCGCGACACTCTTTCCCTTTTTTTTTT	43012.3
UDG_UG_f1TA_f2ACG	12061	38769	38769	0	CGCGAGCTCTAUACGCTCGCGGGAACGCGAGCGTGTAGAGCTCGCGACACTCTTTCCCTTTTTTTTTT	37072.1
UDG_UG_f1TC_f2CAT	9363	29548	29548	0	CGCGAGCTCTCUCATCTCGCGGGAACGCGAGATGGGAGAGCTCGCGACACTCTTTCCCTTTTTTTTTT	28519.7
UDG_UG_f1TA_f2GGG	10168	31265	31265	0	CGCGAGCTCTAUGGGCTCGCGGGAACGCGAGCCCGTAGAGCTCGCGACACTCTTTCCCTTTTTTTTTT	30282.4
UDG_UG_f1TG_f2TGT	11963	36806	36806	0	CGCGAGCTCTGUTGTCTCGCGGGAACGCGAGACAGCAGAGCTCGCGACACTCTTTCCCTTTTTTTTTT	36491.2
UDG_UG_f1CC_f2GTA	10090	31031	31031	0	CGCGAGCTCCCUGTACTCGCGGGAACGCGAGTACGGGGAGCTCGCGACACTCTTTCCCTTTTTTTTTT	30765.6
UDG_UG_f1GG_f2TTC	13265	41418	41418	0	CGCGAGCTCGGUTTCCTCGCGGGAACGCGAGGAAGCCGAGCTCGCGACACTCTTTCCCTTTTTTTTTT	42651.6
UDG_UG_f1GG_f2TGA	11668	36079	36079	0	CGCGAGCTCGGUTGACTCGCGGGAACGCGAGTCAGCCGAGCTCGCGACACTCTTTCCCTTTTTTTTTT	38558
UDG_UG_f1TG_f2AAC	21619	63629	65435	0	CGCGAGCTCTGUAACCTCGCGGGAACGCGAGGTTGCAGAGCTCGCGACACTCTTTCCCTTTTTTTTTT	71292.8
UDG_UG_f1GT_f2TAC	10357	33298	33298	0	CGCGAGCTCGTUTACCTCGCGGGAACGCGAGGTAGACGAGCTCGCGACACTCTTTCCCTTTTTTTTTT	37150.5
UDG_UG_f1CC_f2TGT	8375	26327	26327	0	CGCGAGCTCCCUTGTCTCGCGGGAACGCGAGACAGGGGAGCTCGCGACACTCTTTCCCTTTTTTTTTT	29884.5
UDG_UG_f1GA_f2GGT	11083	34929	34929	0	CGCGAGCTCGAUGGTCTCGCGGGAACGCGAGACCGTCGAGCTCGCGACACTCTTTCCCTTTTTTTTTT	39687.7
UDG_UG_f1AT_f2GTC	12697	40723	40723	0	CGCGAGCTCATUGTCCTCGCGGGAACGCGAGGACGATGAGCTCGCGACACTCTTTCCCTTTTTTTTTT	47243.5
UDG_UG_f1AT_f2CGG	10130	30814	30814	0	CGCGAGCTCATUCGGCTCGCGGGAACGCGAGCCGGATGAGCTCGCGACACTCTTTCCCTTTTTTTTTT	36074.6
UDG_UG_f1TA_f2CGG	15152	47589	47589	0	CGCGAGCTCTAUCGGCTCGCGGGAACGCGAGCCGGTAGAGCTCGCGACACTCTTTCCCTTTTTTTTTT	56486
UDG_UG_f1GG_f2CGC	12236	37090	37090	0	CGCGAGCTCGGUCGCCTCGCGGGAACGCGAGGCGGCCGAGCTCGCGACACTCTTTCCCTTTTTTTTTT	44571
UDG_UG_f1TG_f2ATG	20025	61877	60607	0	CGCGAGCTCTGUATGCTCGCGGGAACGCGAGCATGCAGAGCTCGCGACACTCTTTCCCTTTTTTTTTT	74965.2
UDG_UG_f1TC_f2ATG	10832	32974	32974	0	CGCGAGCTCTCUATGCTCGCGGGAACGCGAGCATGGAGAGCTCGCGACACTCTTTCCCTTTTTTTTTT	41413.1
UDG_UG_f1AT_f2CTT	12162	36982	36982	0	CGCGAGCTCATUCTTCTCGCGGGAACGCGAGAAGGATGAGCTCGCGACACTCTTTCCCTTTTTTTTTT	48045.2
UDG_UG_f1TG_f2GGT	8863	27094	27094	0	CGCGAGCTCTGUGGTCTCGCGGGAACGCGAGACCGCAGAGCTCGCGACACTCTTTCCCTTTTTTTTTT	36812.2
UDG_UG_f1GA_f2CAT	7962	26115	26115	0	CGCGAGCTCGAUCATCTCGCGGGAACGCGAGATGGTCGAGCTCGCGACACTCTTTCCCTTTTTTTTTT	36495.1
UDG_UG_f1GT_f2AAA	12517	38331	38331	0	CGCGAGCTCGTUAAACTCGCGGGAACGCGAGTTTGACGAGCTCGCGACACTCTTTCCCTTTTTTTTTT	55102.6
UDG_UG_f1CA_f2CGA	6865	20713	20713	0	CGCGAGCTCCAUCGACTCGCGGGAACGCGAGTCGGTGGAGCTCGCGACACTCTTTCCCTTTTTTTTTT	30575.7
UDG_UG_f1GA_f2TAC	6616	20301	20301	0	CGCGAGCTCGAUTACCTCGCGGGAACGCGAGGTAGTCGAGCTCGCGACACTCTTTCCCTTTTTTTTTT	32091.9
UDG_UG_f1AG_f2AGG	7633	23501	23501	0	CGCGAGCTCAGUAGGCTCGCGGGAACGCGAGCCTGCTGAGCTCGCGACACTCTTTCCCTTTTTTTTTT	39011.3
UDG_MM_TG	4222	13054	13054	0	CGCGAGCTCACTCTTACCGCGGGAACGCGGTAAGGGTGAGCTCGCGACACTCTTTCCCTTTTTTTTTT	22715.9
UDG_UG_f1TG_f2TTG	5835	18814	18814	0	CGCGAGCTCTGUTTGCTCGCGGGAACGCGAGCAAGCAGAGCTCGCGACACTCTTTCCCTTTTTTTTTT	32739.2
UDG_UG_f1TC_f2GCC	4390	12941	12941	0	CGCGAGCTCTCUGCCCTCGCGGGAACGCGAGGGCGGAGAGCTCGCGACACTCTTTCCCTTTTTTTTTT	22519.3
UDG_UG_f1AT_f2GGA	5218	15946	15946	0	CGCGAGCTCATUGGACTCGCGGGAACGCGAGTCCGATGAGCTCGCGACACTCTTTCCCTTTTTTTTTT	27748.5
UDG_UG_f1AA_f2GGA	5487	16694	16694	0	CGCGAGCTCAAUGGACTCGCGGGAACGCGAGTCCGTTGAGCTCGCGACACTCTTTCCCTTTTTTTTTT	29050.1
UDG_UG_f1GG_f2GCG	4584	14357	14357	0	CGCGAGCTCGGUGCGCTCGCGGGAACGCGAGCGCGCCGAGCTCGCGACACTCTTTCCCTTTTTTTTTT	24983.4
UDG_UG_f1CG_f2AAA	8997	26559	26559	0	CGCGAGCTCCGUAAACTCGCGGGAACGCGAGTTTGCGGAGCTCGCGACACTCTTTCCCTTTTTTTTTT	46216.7
UDG_UG_f1TG_f2GAC	2831	8290	8290	0	CGCGAGCTCTGUGACCTCGCGGGAACGCGAGGTCGCAGAGCTCGCGACACTCTTTCCCTTTTTTTTTT	14425.9
UDG_UG_f1TC_f2ACG	19557	54380	59190	0	CGCGAGCTCTCUACGCTCGCGGGAACGCGAGCGTGGAGAGCTCGCGACACTCTTTCCCTTTTTTTTTT	49732.9
UDG_UG_f1TC_f2CTT	18549	57146	56137	0	CGCGAGCTCTCUCTTCTCGCGGGAACGCGAGAAGGGAGAGCTCGCGACACTCTTTCCCTTTTTTTTTT	47167.6
UDG_UG_f1AA_f2ATT	28618	65535	86634	0	CGCGAGCTCAAUATTCTCGCGGGAACGCGAGAATGTTGAGCTCGCGACACTCTTTCCCTTTTTTTTTT	72792
UDG_UG_f1AC_f2AAG	12560	39095	39095	0	CGCGAGCTCACUAAGCTCGCGGGAACGCGAGCTTGGTGAGCTCGCGACACTCTTTCCCTTTTTTTTTT	32848.6
UDG_UG_f1TC_f2TTC	11184	33959	33959	0	CGCGAGCTCTCUTTCCTCGCGGGAACGCGAGGAAGGAGAGCTCGCGACACTCTTTCCCTTTTTTTTTT	28533.2
UDG_UG_f1CC_f2TTT	13759	42998	42998	0	CGCGAGCTCCCUTTTCTCGCGGGAACGCGAGAAAGGGGAGCTCGCGACACTCTTTCCCTTTTTTTTTT	36127.9
UDG_UG_f1TT_f2ACA	17233	55432	52151	0	CGCGAGCTCTTUACACTCGCGGGAACGCGAGTGTGAAGAGCTCGCGACACTCTTTCCCTTTTTTTTTT	43818.5
UDG_UG_f1TG_f2AAG	23906	65535	72362	0	CGCGAGCTCTGUAAGCTCGCGGGAACGCGAGCTTGCAGAGCTCGCGACACTCTTTCCCTTTTTTTTTT	60800.3
UDG_UG_f1AG_f2GGT	14434	45599	45599	0	CGCGAGCTCAGUGGTCTCGCGGGAACGCGAGACCGCTGAGCTCGCGACACTCTTTCCCTTTTTTTTTT	38407.2
UDG_UG_f1CG_f2GAT	14884	47626	47626	0	CGCGAGCTCCGUGATCTCGCGGGAACGCGAGATCGCGGAGCTCGCGACACTCTTTCCCTTTTTTTTTT	40413.2
UDG_UG_f1AA_f2CTG	16129	53017	48807	0	CGCGAGCTCAAUCTGCTCGCGGGAACGCGAGCAGGTTGAGCTCGCGACACTCTTTCCCTTTTTTTTTT	41777
UDG_UG_f1CC_f2ACC	10896	35911	35911	0	CGCGAGCTCCCUACCCTCGCGGGAACGCGAGGGTGGGGAGCTCGCGACACTCTTTCCCTTTTTTTTTT	30663.6
UDG_UG_f1CA_f2TTT	13723	44215	44215	0	CGCGAGCTCCAUTTTCTCGCGGGAACGCGAGAAAGTGGAGCTCGCGACACTCTTTCCCTTTTTTTTTT	37643.4
UDG_UG_f1CT_f2ATA	29305	65535	88714	0	CGCGAGCTCCTUATACTCGCGGGAACGCGAGTATGAGGAGCTCGCGACACTCTTTCCCTTTTTTTTTT	75306.1
UDG_UG_f1TG_f2GGG	13064	42684	42684	0	CGCGAGCTCTGUGGGCTCGCGGGAACGCGAGCCCGCAGAGCTCGCGACACTCTTTCCCTTTTTTTTTT	36276.8
UDG_UG_f1TT_f2AGT	18108	58837	54801	0	CGCGAGCTCTTUAGTCTCGCGGGAACGCGAGACTGAAGAGCTCGCGACACTCTTTCCCTTTTTTTTTT	46575
UDG_UG_f1GC_f2ATC	15114	49781	49781	0	CGCGAGCTCGCUATCCTCGCGGGAACGCGAGGATGGCGAGCTCGCGACACTCTTTCCCTTTTTTTTTT	42270.8
UDG_UG_f1AA_f2CCT	11700	39338	39338	0	CGCGAGCTCAAUCCTCTCGCGGGAACGCGAGAGGGTTGAGCTCGCGACACTCTTTCCCTTTTTTTTTT	33215
UDG_UG_f1TC_f2TGG	11081	34192	34192	0	CGCGAGCTCTCUTGGCTCGCGGGAACGCGAGCCAGGAGAGCTCGCGACACTCTTTCCCTTTTTTTTTT	28636.3
UDG_UG_f1CC_f2GAT	21463	64493	64963	0	CGCGAGCTCCCUGATCTCGCGGGAACGCGAGATCGGGGAGCTCGCGACACTCTTTCCCTTTTTTTTTT	54583.5
UDG_UG_f1CA_f2TAC	14727	47221	47221	0	CGCGAGCTCCAUTACCTCGCGGGAACGCGAGGTAGTGGAGCTCGCGACACTCTTTCCCTTTTTTTTTT	39723.8
UDG_UG_f1GT_f2TGT	17589	56185	53229	0	CGCGAGCTCGTUTGTCTCGCGGGAACGCGAGACAGACGAGCTCGCGACACTCTTTCCCTTTTTTTTTT	45198.6
UDG_UG_f1AA_f2ATC	33765	65535	102223	0	CGCGAGCTCAAUATCCTCGCGGGAACGCGAGGATGTTGAGCTCGCGACACTCTTTCCCTTTTTTTTTT	86878.6
UDG_UG_f1GA_f2TTT	15309	51667	46323	0	CGCGAGCTCGAUTTTCTCGCGGGAACGCGAGAAAGTCGAGCTCGCGACACTCTTTCCCTTTTTTTTTT	39579.6
UDG_UG_f1TT_f2CCA	13501	44988	44988	0	CGCGAGCTCTTUCCACTCGCGGGAACGCGAGTGGGAAGAGCTCGCGACACTCTTTCCCTTTTTTTTTT	38810.3
UDG_UG_f1GT_f2CTC	16339	51385	49443	0	CGCGAGCTCGTUCTCCTCGCGGGAACGCGAGGAGGACGAGCTCGCGACACTCTTTCCCTTTTTTTTTT	42560.6
UDG_UG_f1AT_f2GTT	17008	54926	51469	0	CGCGAGCTCATUGTTCTCGCGGGAACGCGAGAACGATGAGCTCGCGACACTCTTTCCCTTTTTTTTTT	44514
UDG_UG_f1CA_f2GGT	15404	47948	47948	0	CGCGAGCTCCAUGGTCTCGCGGGAACGCGAGACCGTGGAGCTCGCGACACTCTTTCCCTTTTTTTTTT	41876.3
UDG_UG_f1AC_f2GAG	10926	35308	35308	0	CGCGAGCTCACUGAGCTCGCGGGAACGCGAGCTCGGTGAGCTCGCGACACTCTTTCCCTTTTTTTTTT	31117.8
UDG_UG_f1CC_f2TTC	10233	31639	31639	0	CGCGAGCTCCCUTTCCTCGCGGGAACGCGAGGAAGGGGAGCTCGCGACACTCTTTCCCTTTTTTTTTT	28215.6
UDG_UG_f1TG_f2GGC	13144	42460	42460	0	CGCGAGCTCTGUGGCCTCGCGGGAACGCGAGGCCGCAGAGCTCGCGACACTCTTTCCCTTTTTTTTTT	37421.1
UDG_UG_f1CC_f2ACG	11616	36669	36669	0	CGCGAGCTCCCUACGCTCGCGGGAACGCGAGCGTGGGGAGCTCGCGACACTCTTTCCCTTTTTTTTTT	32829.8
UDG_UG_f1TA_f2TGT	11723	37772	37772	0	CGCGAGCTCTAUTGTCTCGCGGGAACGCGAGACAGTAGAGCTCGCGACACTCTTTCCCTTTTTTTTTT	34003.3
UDG_UG_f1AC_f2TGT	10343	31065	31065	0	CGCGAGCTCACUTGTCTCGCGGGAACGCGAGACAGGTGAGCTCGCGACACTCTTTCCCTTTTTTTTTT	27949.9
UDG_UG_f1CA_f2CGA	12285	39456	39456	0	CGCGAGCTCCAUCGACTCGCGGGAACGCGAGTCGGTGGAGCTCGCGACACTCTTTCCCTTTTTTTTTT	35325
UDG_UG_f1AG_f2ACC	20155	62595	61001	0	CGCGAGCTCAGUACCCTCGCGGGAACGCGAGGGTGCTGAGCTCGCGACACTCTTTCCCTTTTTTTTTT	54434.5
UDG_UG_f1AG_f2AGT	20340	63339	61561	0	CGCGAGCTCAGUAGTCTCGCGGGAACGCGAGACTGCTGAGCTCGCGACACTCTTTCCCTTTTTTTTTT	54735.7
UDG_UG_f1AA_f2TCA	13238	42187	42187	0	CGCGAGCTCAAUTCACTCGCGGGAACGCGAGTGAGTTGAGCTCGCGACACTCTTTCCCTTTTTTTTTT	37674.7
UDG_UG_f1TA_f2GTG	13590	44707	44707	0	CGCGAGCTCTAUGTGCTCGCGGGAACGCGAGCACGTAGAGCTCGCGACACTCTTTCCCTTTTTTTTTT	40039.7
UDG_UG_f1CC_f2TTG	9833	30699	30699	0	CGCGAGCTCCCUTTGCTCGCGGGAACGCGAGCAAGGGGAGCTCGCGACACTCTTTCCCTTTTTTTTTT	27524
UDG_UG_f1AT_f2GGG	12103	38680	38680	0	CGCGAGCTCATUGGGCTCGCGGGAACGCGAGCCCGATGAGCTCGCGACACTCTTTCCCTTTTTTTTTT	35004.8
UDG_UG_f1CG_f2AGA	19043	57795	57633	0	CGCGAGCTCCGUAGACTCGCGGGAACGCGAGTCTGCGGAGCTCGCGACACTCTTTCCCTTTTTTTTTT	52503.5
UDG_UG_f1TT_f2ACC	14161	43770	43770	0	CGCGAGCTCTTUACCCTCGCGGGAACGCGAGGGTGAAGAGCTCGCGACACTCTTTCCCTTTTTTTTTT	40879.8
UDG_UG_f1TG_f2GGG	12821	40757	40757	0	CGCGAGCTCTGUGGGCTCGCGGGAACGCGAGCCCGCAGAGCTCGCGACACTCTTTCCCTTTTTTTTTT	38942
UDG_UG_f1TG_f2GGA	12670	39463	39463	0	CGCGAGCTCTGUGGACTCGCGGGAACGCGAGTCCGCAGAGCTCGCGACACTCTTTCCCTTTTTTTTTT	37902.5
UDG_UG_f1TG_f2GGA	13565	41706	41706	0	CGCGAGCTCTGUGGACTCGCGGGAACGCGAGTCCGCAGAGCTCGCGACACTCTTTCCCTTTTTTTTTT	40347.9
UDG_UG_f1GA_f2CCA	12829	39545	39545	0	CGCGAGCTCGAUCCACTCGCGGGAACGCGAGTGGGTCGAGCTCGCGACACTCTTTCCCTTTTTTTTTT	39077.4
UDG_UG_f1AC_f2AAT	12433	38815	38815	0	CGCGAGCTCACUAATCTCGCGGGAACGCGAGATTGGTGAGCTCGCGACACTCTTTCCCTTTTTTTTTT	38110.8
UDG_UG_f1GC_f2AAC	11015	34144	34144	0	CGCGAGCTCGCUAACCTCGCGGGAACGCGAGGTTGGCGAGCTCGCGACACTCTTTCCCTTTTTTTTTT	34873.9
UDG_UG_f1GT_f2TCG	9271	28589	28589	0	CGCGAGCTCGTUTCGCTCGCGGGAACGCGAGCGAGACGAGCTCGCGACACTCTTTCCCTTTTTTTTTT	30143.2
UDG_UG_f1AC_f2TAA	9079	27545	27545	0	CGCGAGCTCACUTAACTCGCGGGAACGCGAGTTAGGTGAGCTCGCGACACTCTTTCCCTTTTTTTTTT	29819.3
UDG_UG_f1TG_f2TCC	9482	29498	29498	0	CGCGAGCTCTGUTCCCTCGCGGGAACGCGAGGGAGCAGAGCTCGCGACACTCTTTCCCTTTTTTTTTT	32807.4
UDG_UG_f1GA_f2CTG	11971	36210	36210	0	CGCGAGCTCGAUCTGCTCGCGGGAACGCGAGCAGGTCGAGCTCGCGACACTCTTTCCCTTTTTTTTTT	40796.4
UDG_UG_f1TG_f2CCT	10480	32023	32023	0	CGCGAGCTCTGUCCTCTCGCGGGAACGCGAGAGGGCAGAGCTCGCGACACTCTTTCCCTTTTTTTTTT	36385.8
UDG_UG_f1CC_f2CTT	8802	28574	28574	0	CGCGAGCTCCCUCTTCTCGCGGGAACGCGAGAAGGGGGAGCTCGCGACACTCTTTCCCTTTTTTTTTT	32955.8
UDG_UG_f1TC_f2CAA	8218	24889	24889	0	CGCGAGCTCTCUCAACTCGCGGGAACGCGAGTTGGGAGAGCTCGCGACACTCTTTCCCTTTTTTTTTT	28992.8
UDG_UG_f1TT_f2AGT	13411	41234	41234	0	CGCGAGCTCTTUAGTCTCGCGGGAACGCGAGACTGAAGAGCTCGCGACACTCTTTCCCTTTTTTTTTT	48472.1
UDG_Uloop	10857	34236	34236	0	CGCGAGCTCGGCTATCTCGCGGUAACGCGAGATAGCCGAGCTCGCGACACTCTTTCCCTTTTTTTTTT	40747.2
UDG_UG_f1TT_f2GTG	12780	39481	39481	0	CGCGAGCTCTTUGTGCTCGCGGGAACGCGAGCACGAAGAGCTCGCGACACTCTTTCCCTTTTTTTTTT	48168.8
UDG_UG_f1GA_f2AAC	14472	42910	42910	0	CGCGAGCTCGAUAACCTCGCGGGAACGCGAGGTTGTCGAGCTCGCGACACTCTTTCCCTTTTTTTTTT	53743.1
UDG_UG_f1TG_f2ATC	16040	48836	48836	0	CGCGAGCTCTGUATCCTCGCGGGAACGCGAGGATGCAGAGCTCGCGACACTCTTTCCCTTTTTTTTTT	62503.2
UDG_UG_f1CT_f2CCA	8749	26607	26607	0	CGCGAGCTCCTUCCACTCGCGGGAACGCGAGTGGGAGGAGCTCGCGACACTCTTTCCCTTTTTTTTTT	35594.6
UDG_UG_f1CT_f2GAG	7227	23127	23127	0	CGCGAGCTCCTUGAGCTCGCGGGAACGCGAGCTCGAGGAGCTCGCGACACTCTTTCCCTTTTTTTTTT	31891.2
UDG_UG_f1GT_f2TAA	6848	21137	21137	0	CGCGAGCTCGTUTAACTCGCGGGAACGCGAGTTAGACGAGCTCGCGACACTCTTTCCCTTTTTTTTTT	30005.7
UDG_UG_f1CA_f2ATC	11985	37541	37541	0	CGCGAGCTCCAUATCCTCGCGGGAACGCGAGGATGTGGAGCTCGCGACACTCTTTCCCTTTTTTTTTT	54964.4
UDG_UG_f1TA_f2AAG	8320	25872	25872	0	CGCGAGCTCTAUAAGCTCGCGGGAACGCGAGCTTGTAGAGCTCGCGACACTCTTTCCCTTTTTTTTTT	39692.7
UDG_MM_TC	6504	20298	20298	0	CGCGAGCTCACTCTTACCGCGGGAACGCGGTAAGCGTGAGCTCGCGACACTCTTTCCCTTTTTTTTTT	32925
UDG_UG_f1CG_f2GTG	8471	26653	26653	0	CGCGAGCTCCGUGTGCTCGCGGGAACGCGAGCACGCGGAGCTCGCGACACTCTTTCCCTTTTTTTTTT	45743.9
UDG_UG_f1GC_f2GCT	5680	17410	17410	0	CGCGAGCTCGCUGCTCTCGCGGGAACGCGAGAGCGGCGAGCTCGCGACACTCTTTCCCTTTTTTTTTT	29880.4
UDG_UG_f1AT_f2TAA	5707	17488	17488	0	CGCGAGCTCATUTAACTCGCGGGAACGCGAGTTAGATGAGCTCGCGACACTCTTTCCCTTTTTTTTTT	30014.2
UDG_UG_f1CC_f2TAG	4179	12770	12770	0	CGCGAGCTCCCUTAGCTCGCGGGAACGCGAGCTAGGGGAGCTCGCGACACTCTTTCCCTTTTTTTTTT	21916.8
UDG_UG_f1CG_f2ATT	10612	32200	32200	0	CGCGAGCTCCGUATTCTCGCGGGAACGCGAGAATGCGGAGCTCGCGACACTCTTTCCCTTTTTTTTTT	55264.1
UDG_UG_f1TG_f2GAG	2888	8618	8618	0	CGCGAGCTCTGUGAGCTCGCGGGAACGCGAGCTCGCAGAGCTCGCGACACTCTTTCCCTTTTTTTTTT	14790.9
UDG_UG_f1AC_f2GAT	2368	7065	7065	0	CGCGAGCTCACUGATCTCGCGGGAACGCGAGATCGGTGAGCTCGCGACACTCTTTCCCTTTTTTTTTT	12125.5
UDG_UG_f1GG_f2TCC	2371	6845	6845	0	CGCGAGCTCGGUTCCCTCGCGGGAACGCGAGGGAGCCGAGCTCGCGACACTCTTTCCCTTTTTTTTTT	11747.9
UDG_UG_f1CC_f2AAG	16135	50453	48825	0	CGCGAGCTCCCUAAGCTCGCGGGAACGCGAGCTTGGGGAGCTCGCGACACTCTTTCCCTTTTTTTTTT	40864
UDG_UG_f1AG_f2CCC	14084	45123	45123	0	CGCGAGCTCAGUCCCCTCGCGGGAACGCGAGGGGGCTGAGCTCGCGACACTCTTTCCCTTTTTTTTTT	37765.7
UDG_UG_f1GG_f2GAC	15261	48721	48721	0	CGCGAGCTCGGUGACCTCGCGGGAACGCGAGGTCGCCGAGCTCGCGACACTCTTTCCCTTTTTTTTTT	40777
UDG_UG_f1TT_f2CGA	15881	51239	48056	0	CGCGAGCTCTTUCGACTCGCGGGAACGCGAGTCGGAAGAGCTCGCGACACTCTTTCCCTTTTTTTTTT	40220.4
UDG_UG_f1TC_f2TGC	14061	44086	44086	0	CGCGAGCTCTCUTGCCTCGCGGGAACGCGAGGCAGGAGAGCTCGCGACACTCTTTCCCTTTTTTTTTT	36897.7
UDG_UG_random_5U	13726	41721	41721	0	CGCGCGAGUUAACUUUGCGCGGGAACGCGCGGGGTTGGCTCGCGCGACACTCTTTCCCTTTTTTTTTT	34918.4
UDG_UG_f1GT_f2ACG	16622	50867	50300	0	CGCGAGCTCGTUACGCTCGCGGGAACGCGAGCGTGACGAGCTCGCGACACTCTTTCCCTTTTTTTTTT	42098.5
UDG_UG_f1AG_f2ATA	24187	65535	73213	0	CGCGAGCTCAGUATACTCGCGGGAACGCGAGTATGCTGAGCTCGCGACACTCTTTCCCTTTTTTTTTT	61275.6
UDG_UG_f1AT_f2TAA	13829	44107	44107	0	CGCGAGCTCATUTAACTCGCGGGAACGCGAGTTAGATGAGCTCGCGACACTCTTTCCCTTTTTTTTTT	36961.9
UDG_UG_f1AC_f2GCC	10592	34601	34601	0	CGCGAGCTCACUGCCCTCGCGGGAACGCGAGGGCGGTGAGCTCGCGACACTCTTTCCCTTTTTTTTTT	29107.5
UDG_UG_f1AC_f2TGC	10772	32245	32245	0	CGCGAGCTCACUTGCCTCGCGGGAACGCGAGGCAGGTGAGCTCGCGACACTCTTTCCCTTTTTTTTTT	27371.6
UDG_UG_f1GG_f2TTC	12285	38939	38939	0	CGCGAGCTCGGUTTCCTCGCGGGAACGCGAGGAAGCCGAGCTCGCGACACTCTTTCCCTTTTTTTTTT	33041.8
UDG_UG_f1CG_f2TCG	11919	38358	38358	0	CGCGAGCTCCGUTCGCTCGCGGGAACGCGAGCGAGCGGAGCTCGCGACACTCTTTCCCTTTTTTTTTT	32387.5
UDG_UG_f1TC_f2AGC	11232	37911	37911	0	CGCGAGCTCTCUAGCCTCGCGGGAACGCGAGGCTGGAGAGCTCGCGACACTCTTTCCCTTTTTTTTTT	31769.7
UDG_UG_f1TA_f2ATC	19569	62810	59226	0	CGCGAGCTCTAUATCCTCGCGGGAACGCGAGGATGTAGAGCTCGCGACACTCTTTCCCTTTTTTTTTT	49822.8
UDG_UG_f1CT_f2TAT	12284	41118	41118	0	CGCGAGCTCCTUTATCTCGCGGGAACGCGAGATAGAGGAGCTCGCGACACTCTTTCCCTTTTTTTTTT	34548.3
UDG_UG_f1GG_f2CTC	13570	43765	43765	0	CGCGAGCTCGGUCTCCTCGCGGGAACGCGAGGAGGCCGAGCTCGCGACACTCTTTCCCTTTTTTTTTT	36522.1
UDG_UG_f1CG_f2GCT	15809	48651	48651	0	CGCGAGCTCCGUGCTCTCGCGGGAACGCGAGAGCGCGGAGCTCGCGACACTCTTTCCCTTTTTTTTTT	40599.5
UDG_UG_f1TT_f2CAT	12829	41008	41008	0	CGCGAGCTCTTUCATCTCGCGGGAACGCGAGATGGAAGAGCTCGCGACACTCTTTCCCTTTTTTTTTT	33891
UDG_UG_f1GC_f2CTC	12361	40262	40262	0	CGCGAGCTCGCUCTCCTCGCGGGAACGCGAGGAGGGCGAGCTCGCGACACTCTTTCCCTTTTTTTTTT	33470.3
UDG_UG_f1AA_f2GAC	16351	50781	49479	0	CGCGAGCTCAAUGACCTCGCGGGAACGCGAGGTCGTTGAGCTCGCGACACTCTTTCCCTTTTTTTTTT	41144.5
UDG_UG_f1CG_f2TGA	17108	54494	51772	0	CGCGAGCTCCGUTGACTCGCGGGAACGCGAGTCAGCGGAGCTCGCGACACTCTTTCCCTTTTTTTTTT	43605.6
UDG_UG_f1GG_f2TAA	14575	47666	47666	0	CGCGAGCTCGGUTAACTCGCGGGAACGCGAGTTAGCCGAGCTCGCGACACTCTTTCCCTTTTTTTTTT	40205.6
UDG_UG_f1GA_f2ACC	15237	47697	47697	0	CGCGAGCTCGAUACCCTCGCGGGAACGCGAGGGTGTCGAGCTCGCGACACTCTTTCCCTTTTTTTTTT	40488.2
UDG_UG_f1CG_f2CTG	14998	47702	47702	0	CGCGAGCTCCGUCTGCTCGCGGGAACGCGAGCAGGCGGAGCTCGCGACACTCTTTCCCTTTTTTTTTT	40541.6
UDG_UG_f1TT_f2CCC	12023	39399	39399	0	CGCGAGCTCTTUCCCCTCGCGGGAACGCGAGGGGGAAGAGCTCGCGACACTCTTTCCCTTTTTTTTTT	33455.1
UDG_UG_f1GC_f2GCC	11657	37607	37607	0	CGCGAGCTCGCUGCCCTCGCGGGAACGCGAGGGCGGCGAGCTCGCGACACTCTTTCCCTTTTTTTTTT	31961.9
UDG_UG_f1GA_f2CCA	13637	43882	43882	0	CGCGAGCTCGAUCCACTCGCGGGAACGCGAGTGGGTCGAGCTCGCGACACTCTTTCCCTTTTTTTTTT	37856.2
UDG_UG_f1GC_f2GGT	12620	39385	39385	0	CGCGAGCTCGCUGGTCTCGCGGGAACGCGAGACCGGCGAGCTCGCGACACTCTTTCCCTTTTTTTTTT	34492.5
UDG_UG_f1CG_f2AGG	17218	52587	52105	0	CGCGAGCTCCGUAGGCTCGCGGGAACGCGAGCCTGCGGAGCTCGCGACACTCTTTCCCTTTTTTTTTT	45879
UDG_UG_f1GG_f2ACT	18587	58851	56252	0	CGCGAGCTCGGUACTCTCGCGGGAACGCGAGAGTGCCGAGCTCGCGACACTCTTTCCCTTTTTTTTTT	49536.3
UDG_UG_f1GT_f2ACG	14408	47350	47350	0	CGCGAGCTCGTUACGCTCGCGGGAACGCGAGCGTGACGAGCTCGCGACACTCTTTCCCTTTTTTTTTT	42319.1
UDG_UG_f1GT_f2ACA	14463	46306	46306	0	CGCGAGCTCGTUACACTCGCGGGAACGCGAGTGTGACGAGCTCGCGACACTCTTTCCCTTTTTTTTTT	41685.8
UDG_MM_TC	10813	35611	35611	0	CGCGAGCTCACTCTTACCGCGGGAACGCGGTAAGCGTGAGCTCGCGACACTCTTTCCCTTTTTTTTTT	32057.9
UDG_UG_f1GC_f2TGA	11015	33196	33196	0	CGCGAGCTCGCUTGACTCGCGGGAACGCGAGTCAGGCGAGCTCGCGACACTCTTTCCCTTTTTTTTTT	29823.2
UDG_UG_f1CA_f2ACA	16406	49683	49683	0	CGCGAGCTCCAUACACTCGCGGGAACGCGAGTGTGTGGAGCTCGCGACACTCTTTCCCTTTTTTTTTT	44481.2
UDG_UG_f1CT_f2GTT	16473	52661	49849	0	CGCGAGCTCCTUGTTCTCGCGGGAACGCGAGAACGAGGAGCTCGCGACACTCTTTCCCTTTTTTTTTT	44517.2
UDG_UG_f1CT_f2CTG	21518	63217	65129	0	CGCGAGCTCCTUCTGCTCGCGGGAACGCGAGCAGGAGGAGCTCGCGACACTCTTTCCCTTTTTTTTTT	58393.1
UDG_UG_f1TG_f2TCG	11910	37244	37244	0	CGCGAGCTCTGUTCGCTCGCGGGAACGCGAGCGAGCAGAGCTCGCGACACTCTTTCCCTTTTTTTTTT	33509.3
UDG_UG_f1CA_f2CCT	10581	33692	33692	0	CGCGAGCTCCAUCCTCTCGCGGGAACGCGAGAGGGTGGAGCTCGCGACACTCTTTCCCTTTTTTTTTT	30319.4
UDG_UG_f1AT_f2ACC	14805	45205	45205	0	CGCGAGCTCATUACCCTCGCGGGAACGCGAGGGTGATGAGCTCGCGACACTCTTTCCCTTTTTTTTTT	41531
UDG_UG_f1AT_f2CAT	13971	43909	43909	0	CGCGAGCTCATUCATCTCGCGGGAACGCGAGATGGATGAGCTCGCGACACTCTTTCCCTTTTTTTTTT	40848.4
UDG_UG_f1AG_f2TTA	17359	54625	52532	0	CGCGAGCTCAGUTTACTCGCGGGAACGCGAGTAAGCTGAGCTCGCGACACTCTTTCCCTTTTTTTTTT	50192.6
UDG_UG_f1TC_f2CTG	12584	38490	38490	0	CGCGAGCTCTCUCTGCTCGCGGGAACGCGAGCAGGGAGAGCTCGCGACACTCTTTCCCTTTTTTTTTT	36883.1
UDG_UG_f1CA_f2AAA	16663	51685	50424	0	CGCGAGCTCCAUAAACTCGCGGGAACGCGAGTTTGTGGAGCTCGCGACACTCTTTCCCTTTTTTTTTT	48712.2
UDG_UG_f1TC_f2CCT	10380	31471	31471	0	CGCGAGCTCTCUCCTCTCGCGGGAACGCGAGAGGGGAGAGCTCGCGACACTCTTTCCCTTTTTTTTTT	30481.1
UDG_UG_f1TA_f2GGG	10113	32514	32514	0	CGCGAGCTCTAUGGGCTCGCGGGAACGCGAGCCCGTAGAGCTCGCGACACTCTTTCCCTTTTTTTTTT	32235.9
UDG_UG_f1CA_f2AAC	15097	48148	48148	0	CGCGAGCTCCAUAACCTCGCGGGAACGCGAGGTTGTGGAGCTCGCGACACTCTTTCCCTTTTTTTTTT	47274.4
UDG_UG_f1CA_f2CCA	9823	29407	29407	0	CGCGAGCTCCAUCCACTCGCGGGAACGCGAGTGGGTGGAGCTCGCGACACTCTTTCCCTTTTTTTTTT	30080.3
UDG_UG_f1AT_f2ACC	12354	38802	38802	0	CGCGAGCTCATUACCCTCGCGGGAACGCGAGGGTGATGAGCTCGCGACACTCTTTCCCTTTTTTTTTT	40994
UDG_UG_f1CT_f2AGC	10577	32988	32988	0	CGCGAGCTCCTUAGCCTCGCGGGAACGCGAGGCTGAGGAGCTCGCGACACTCTTTCCCTTTTTTTTTT	35735.7
UDG_UG_f1TA_f2TGG	7917	24993	24993	0	CGCGAGCTCTAUTGGCTCGCGGGAACGCGAGCCAGTAGAGCTCGCGACACTCTTTCCCTTTTTTTTTT	27797
UDG_UG_f1GC_f2GTC	10365	31733	31733	0	CGCGAGCTCGCUGTCCTCGCGGGAACGCGAGGACGGCGAGCTCGCGACACTCTTTCCCTTTTTTTTTT	35688.5
UDG_UG_f1GC_f2TGT	9421	29207	29207	0	CGCGAGCTCGCUTGTCTCGCGGGAACGCGAGACAGGCGAGCTCGCGACACTCTTTCCCTTTTTTTTTT	33162.8
UDG_UG_f1TA_f2ATT	15765	48602	48602	0	CGCGAGCTCTAUATTCTCGCGGGAACGCGAGAATGTAGAGCTCGCGACACTCTTTCCCTTTTTTTTTT	56098.6
UDG_UG_f1GG_f2GAC	11151	34673	34673	0	CGCGAGCTCGGUGACCTCGCGGGAACGCGAGGTCGCCGAGCTCGCGACACTCTTTCCCTTTTTTTTTT	40641.1
UDG_UG_f1TG_f2GCG	10962	33587	33587	0	CGCGAGCTCTGUGCGCTCGCGGGAACGCGAGCGCGCAGAGCTCGCGACACTCTTTCCCTTTTTTTTTT	39866.3
UDG_UG_f1GA_f2TAA	9058	28899	28899	0	CGCGAGCTCGAUTAACTCGCGGGAACGCGAGTTAGTCGAGCTCGCGACACTCTTTCCCTTTTTTTTTT	34726.8
UDG_UG_f1GG_f2CAA	9936	30035	30035	0	CGCGAGCTCGGUCAACTCGCGGGAACGCGAGTTGGCCGAGCTCGCGACACTCTTTCCCTTTTTTTTTT	36811
UDG_UG_f1AT_f2CCA	9690	30549	30549	0	CGCGAGCTCATUCCACTCGCGGGAACGCGAGTGGGATGAGCTCGCGACACTCTTTCCCTTTTTTTTTT	38351.9
UDG_UG_f1TA_f2AGA	9011	28504	28504	0	CGCGAGCTCTAUAGACTCGCGGGAACGCGAGTCTGTAGAGCTCGCGACACTCTTTCCCTTTTTTTTTT	37031
UDG_UC_randomFlank	10631	33479	33479	0	CGCGAGCTCACUCTACGCGCGGGAACGCGCGTAGCGTGAGCTCGCGACACTCTTTCCCTTTTTTTTTT	44775.1
UDG_UG_f1GA_f2TGA	8529	26419	26419	0	CGCGAGCTCGAUTGACTCGCGGGAACGCGAGTCAGTCGAGCTCGCGACACTCTTTCCCTTTTTTTTTT	36225
UDG_UG_f1GG_f2GCG	9014	27213	27213	0	CGCGAGCTCGGUGCGCTCGCGGGAACGCGAGCGCGCCGAGCTCGCGACACTCTTTCCCTTTTTTTTTT	38466.5
UDG_UG_f1CG_f2TAT	8041	25351	25351	0	CGCGAGCTCCGUTATCTCGCGGGAACGCGAGATAGCGGAGCTCGCGACACTCTTTCCCTTTTTTTTTT	37150.5
UDG_UG_f1AT_f2TAT	7859	23867	23867	0	CGCGAGCTCATUTATCTCGCGGGAACGCGAGATAGATGAGCTCGCGACACTCTTTCCCTTTTTTTTTT	36883.2
UDG_UG_f1TT_f2CCA	7293	22114	22114	0	CGCGAGCTCTTUCCACTCGCGGGAACGCGAGTGGGAAGAGCTCGCGACACTCTTTCCCTTTTTTTTTT	35870.7
UDG_UG_f1CG_f2GGA	6709	20967	20967	0	CGCGAGCTCCGUGGACTCGCGGGAACGCGAGTCCGCGGAGCTCGCGACACTCTTTCCCTTTTTTTTTT	36410.7
UDG_UG_f1AT_f2CCC	7055	21694	21694	0	CGCGAGCTCATUCCCCTCGCGGGAACGCGAGGGGGATGAGCTCGCGACACTCTTTCCCTTTTTTTTTT	37673.2
UDG_UG_f1GA_f2AAA	11569	35414	35414	0	CGCGAGCTCGAUAAACTCGCGGGAACGCGAGTTTGTCGAGCTCGCGACACTCTTTCCCTTTTTTTTTT	61499
UDG_UG_f1TG_f2GCG	5801	17958	17958	0	CGCGAGCTCTGUGCGCTCGCGGGAACGCGAGCGCGCAGAGCTCGCGACACTCTTTCCCTTTTTTTTTT	31185.4
UDG_UG_f1GG_f2ATT	10280	31084	31084	0	CGCGAGCTCGGUATTCTCGCGGGAACGCGAGAATGCCGAGCTCGCGACACTCTTTCCCTTTTTTTTTT	53979.6
UDG_UG_f1AC_f2ACC	3088	9259	9259	0	CGCGAGCTCACUACCCTCGCGGGAACGCGAGGGTGGTGAGCTCGCGACACTCTTTCCCTTTTTTTTTT	16078.9
UDG_UG_f1TA_f2ACA	3333	9724	9724	0	CGCGAGCTCTAUACACTCGCGGGAACGCGAGTGTGTAGAGCTCGCGACACTCTTTCCCTTTTTTTTTT	16886.4
UDG_UG_f1AT_f2TGG	2056	5996	5996	0	CGCGAGCTCATUTGGCTCGCGGGAACGCGAGCCAGATGAGCTCGCGACACTCTTTCCCTTTTTTTTTT	10412.5
UDG_UG_f1CT_f2GTT	15573	47829	47829	0	CGCGAGCTCCTUGTTCTCGCGGGAACGCGAGAACGAGGAGCTCGCGACACTCTTTCCCTTTTTTTTTT	39714.6
UDG_UG_f1CA_f2ACA	17576	54942	53190	0	CGCGAGCTCCAUACACTCGCGGGAACGCGAGTGTGTGGAGCTCGCGACACTCTTTCCCTTTTTTTTTT	44166.1
UDG_UG_f1TT_f2TAT	19544	61825	59150	0	CGCGAGCTCTTUTATCTCGCGGGAACGCGAGATAGAAGAGCTCGCGACACTCTTTCCCTTTTTTTTTT	49115
UDG_UG_f1CA_f2CAC	14266	47728	47728	0	CGCGAGCTCCAUCACCTCGCGGGAACGCGAGGTGGTGGAGCTCGCGACACTCTTTCCCTTTTTTTTTT	39630.7
UDG_UG_f1CA_f2GAA	18038	53863	54589	0	CGCGAGCTCCAUGAACTCGCGGGAACGCGAGTTCGTGGAGCTCGCGACACTCTTTCCCTTTTTTTTTT	45327.7
UDG_UG_f1CT_f2AAA	20846	62638	63094	0	CGCGAGCTCCTUAAACTCGCGGGAACGCGAGTTTGAGGAGCTCGCGACACTCTTTCCCTTTTTTTTTT	52389.8
UDG_UG_f1CG_f2ATA	23813	65535	72080	0	CGCGAGCTCCGUATACTCGCGGGAACGCGAGTATGCGGAGCTCGCGACACTCTTTCCCTTTTTTTTTT	59851.3
UDG_UG_f1TA_f2CTT	13182	40862	40862	0	CGCGAGCTCTAUCTTCTCGCGGGAACGCGAGAAGGTAGAGCTCGCGACACTCTTTCCCTTTTTTTTTT	33929.6
UDG_UG_f1AC_f2TCG	11446	34869	34869	0	CGCGAGCTCACUTCGCTCGCGGGAACGCGAGCGAGGTGAGCTCGCGACACTCTTTCCCTTTTTTTTTT	29114.1
UDG_UG_f1AA_f2CCA	12448	40990	40990	0	CGCGAGCTCAAUCCACTCGCGGGAACGCGAGTGGGTTGAGCTCGCGACACTCTTTCCCTTTTTTTTTT	34306.5
UDG_UG_f1AA_f2CAC	13678	41065	41065	0	CGCGAGCTCAAUCACCTCGCGGGAACGCGAGGTGGTTGAGCTCGCGACACTCTTTCCCTTTTTTTTTT	34589.1
UDG_UG_f1GT_f2TGA	11564	36675	36675	0	CGCGAGCTCGTUTGACTCGCGGGAACGCGAGTCAGACGAGCTCGCGACACTCTTTCCCTTTTTTTTTT	30852.2
UDG_UG_f1TG_f2TTC	13919	45250	45250	0	CGCGAGCTCTGUTTCCTCGCGGGAACGCGAGGAAGCAGAGCTCGCGACACTCTTTCCCTTTTTTTTTT	37919.8
UDG_UG_f1CG_f2GTA	20251	60707	61292	0	CGCGAGCTCCGUGTACTCGCGGGAACGCGAGTACGCGGAGCTCGCGACACTCTTTCCCTTTTTTTTTT	50860.6
UDG_UG_f1AC_f2CAG	9522	30428	30428	0	CGCGAGCTCACUCAGCTCGCGGGAACGCGAGCTGGGTGAGCTCGCGACACTCTTTCCCTTTTTTTTTT	25302.5
UDG_UG_f1AT_f2CAC	13246	44162	44162	0	CGCGAGCTCATUCACCTCGCGGGAACGCGAGGTGGATGAGCTCGCGACACTCTTTCCCTTTTTTTTTT	36669.7
UDG_UG_f1GA_f2AGG	15804	51493	47823	0	CGCGAGCTCGAUAGGCTCGCGGGAACGCGAGCCTGTCGAGCTCGCGACACTCTTTCCCTTTTTTTTTT	39709.6
UDG_UG_f1AA_f2GGG	14672	49418	49418	0	CGCGAGCTCAAUGGGCTCGCGGGAACGCGAGCCCGTTGAGCTCGCGACACTCTTTCCCTTTTTTTTTT	41034
UDG_UG_f1TC_f2GGG	11006	35593	35593	0	CGCGAGCTCTCUGGGCTCGCGGGAACGCGAGCCCGGAGAGCTCGCGACACTCTTTCCCTTTTTTTTTT	29415.8
UDG_UG_f1CC_f2TGG	9662	32228	32228	0	CGCGAGCTCCCUTGGCTCGCGGGAACGCGAGCCAGGGGAGCTCGCGACACTCTTTCCCTTTTTTTTTT	26799.3
UDG_UG_f1CT_f2GGC	11104	34385	34385	0	CGCGAGCTCCTUGGCCTCGCGGGAACGCGAGGCCGAGGAGCTCGCGACACTCTTTCCCTTTTTTTTTT	28778.5
UDG_UG_f1GG_f2GTG	19314	58670	58454	0	CGCGAGCTCGGUGTGCTCGCGGGAACGCGAGCACGCCGAGCTCGCGACACTCTTTCCCTTTTTTTTTT	49355.6
UDG_UG_f1AC_f2ATC	14924	46666	46666	0	CGCGAGCTCACUATCCTCGCGGGAACGCGAGGATGGTGAGCTCGCGACACTCTTTCCCTTTTTTTTTT	39402.4
UDG_UG_f1CG_f2GAC	15077	46965	46965	0	CGCGAGCTCCGUGACCTCGCGGGAACGCGAGGTCGCGGAGCTCGCGACACTCTTTCCCTTTTTTTTTT	39866.9
UDG_UG_f1GG_f2TAC	13056	42420	42420	0	CGCGAGCTCGGUTACCTCGCGGGAACGCGAGGTAGCCGAGCTCGCGACACTCTTTCCCTTTTTTTTTT	36052.4
UDG_UG_f1AC_f2AGG	11961	39199	39199	0	CGCGAGCTCACUAGGCTCGCGGGAACGCGAGCCTGGTGAGCTCGCGACACTCTTTCCCTTTTTTTTTT	33314.9
UDG_UG_f1TA_f2GCC	12949	43064	43064	0	CGCGAGCTCTAUGCCCTCGCGGGAACGCGAGGGCGTAGAGCTCGCGACACTCTTTCCCTTTTTTTTTT	36795.1
UDG_UG_f1CG_f2GAT	14279	46097	46097	0	CGCGAGCTCCGUGATCTCGCGGGAACGCGAGATCGCGGAGCTCGCGACACTCTTTCCCTTTTTTTTTT	39867.9
UDG_UG_f1GG_f2CGG	14801	45544	45544	0	CGCGAGCTCGGUCGGCTCGCGGGAACGCGAGCCGGCCGAGCTCGCGACACTCTTTCCCTTTTTTTTTT	39863.9
UDG_UG_f1GT_f2TGA	11690	37307	37307	0	CGCGAGCTCGTUTGACTCGCGGGAACGCGAGTCAGACGAGCTCGCGACACTCTTTCCCTTTTTTTTTT	32849.2
UDG_UG_f1TA_f2AAA	16965	53957	51339	0	CGCGAGCTCTAUAAACTCGCGGGAACGCGAGTTTGTAGAGCTCGCGACACTCTTTCCCTTTTTTTTTT	45246.4
UDG_UG_f1CG_f2ATT	30605	65535	92652	0	CGCGAGCTCCGUATTCTCGCGGGAACGCGAGAATGCGGAGCTCGCGACACTCTTTCCCTTTTTTTTTT	83238.3
UDG_UG_f1AA_f2TGC	13266	43635	43635	0	CGCGAGCTCAAUTGCCTCGCGGGAACGCGAGGCAGTTGAGCTCGCGACACTCTTTCCCTTTTTTTTTT	39530.4
UDG_UG_f1AC_f2AGA	12293	39648	39648	0	CGCGAGCTCACUAGACTCGCGGGAACGCGAGTCTGGTGAGCTCGCGACACTCTTTCCCTTTTTTTTTT	35693.9
UDG_UG_f1CG_f2GGG	13658	41600	41600	0	CGCGAGCTCCGUGGGCTCGCGGGAACGCGAGCCCGCGGAGCTCGCGACACTCTTTCCCTTTTTTTTTT	37428.5
UDG_UG_f1TC_f2CTC	12578	38437	38437	0	CGCGAGCTCTCUCTCCTCGCGGGAACGCGAGGAGGGAGAGCTCGCGACACTCTTTCCCTTTTTTTTTT	34531.7
UDG_UG_f1GG_f2TTT	16995	54913	51430	0	CGCGAGCTCGGUTTTCTCGCGGGAACGCGAGAAAGCCGAGCTCGCGACACTCTTTCCCTTTTTTTTTT	46177.7
UDG_UG_f1GC_f2AAT	19016	58950	57551	0	CGCGAGCTCGCUAATCTCGCGGGAACGCGAGATTGGCGAGCTCGCGACACTCTTTCCCTTTTTTTTTT	51780
UDG_UG_f1AT_f2GTA	30401	65535	92034	0	CGCGAGCTCATUGTACTCGCGGGAACGCGAGTACGATGAGCTCGCGACACTCTTTCCCTTTTTTTTTT	82851.3
UDG_UG_f1CG_f2ACC	24190	65535	73222	0	CGCGAGCTCCGUACCCTCGCGGGAACGCGAGGGTGCGGAGCTCGCGACACTCTTTCCCTTTTTTTTTT	66213.1
UDG_UG_f1GT_f2ACA	14221	46020	46020	0	CGCGAGCTCGTUACACTCGCGGGAACGCGAGTGTGACGAGCTCGCGACACTCTTTCCCTTTTTTTTTT	42704.3
UDG_UG_f1GC_f2GGT	12270	37471	37471	0	CGCGAGCTCGCUGGTCTCGCGGGAACGCGAGACCGGCGAGCTCGCGACACTCTTTCCCTTTTTTTTTT	35202.1
UDG_UG_f1GA_f2AAT	20358	61838	61616	0	CGCGAGCTCGAUAATCTCGCGGGAACGCGAGATTGTCGAGCTCGCGACACTCTTTCCCTTTTTTTTTT	58739.2
UDG_UG_f1AA_f2GCC	12877	40437	40437	0	CGCGAGCTCAAUGCCCTCGCGGGAACGCGAGGGCGTTGAGCTCGCGACACTCTTTCCCTTTTTTTTTT	38748.9
UDG_UG_f1GC_f2CAT	11223	35164	35164	0	CGCGAGCTCGCUCATCTCGCGGGAACGCGAGATGGGCGAGCTCGCGACACTCTTTCCCTTTTTTTTTT	33940.2
UDG_UG_f1TC_f2CTA	11049	36282	36282	0	CGCGAGCTCTCUCTACTCGCGGGAACGCGAGTAGGGAGAGCTCGCGACACTCTTTCCCTTTTTTTTTT	35100.5
UDG_UG_f1CA_f2GTC	12014	37361	37361	0	CGCGAGCTCCAUGTCCTCGCGGGAACGCGAGGACGTGGAGCTCGCGACACTCTTTCCCTTTTTTTTTT	36919.3
UDG_UG_f1TG_f2ATG	22716	65535	68758	0	CGCGAGCTCTGUATGCTCGCGGGAACGCGAGCATGCAGAGCTCGCGACACTCTTTCCCTTTTTTTTTT	67400
UDG_UG_f1GT_f2ATC	19492	58393	58993	0	CGCGAGCTCGTUATCCTCGCGGGAACGCGAGGATGACGAGCTCGCGACACTCTTTCCCTTTTTTTTTT	60098.7
UDG_UG_f1GA_f2AAT	18072	56553	54692	0	CGCGAGCTCGAUAATCTCGCGGGAACGCGAGATTGTCGAGCTCGCGACACTCTTTCCCTTTTTTTTTT	56918.9
UDG_UG_f1GC_f2TAT	10560	31563	31563	0	CGCGAGCTCGCUTATCTCGCGGGAACGCGAGATAGGCGAGCTCGCGACACTCTTTCCCTTTTTTTTTT	34114.4
UDG_UG_f1CG_f2ATT	26137	65535	79119	0	CGCGAGCTCCGUATTCTCGCGGGAACGCGAGAATGCGGAGCTCGCGACACTCTTTCCCTTTTTTTTTT	87385.8
UDG_UG_f1TA_f2TAG	8690	26568	26568	0	CGCGAGCTCTAUTAGCTCGCGGGAACGCGAGCTAGTAGAGCTCGCGACACTCTTTCCCTTTTTTTTTT	29734.7
UDG_UG_f1CG_f2CGG	10830	33565	33565	0	CGCGAGCTCCGUCGGCTCGCGGGAACGCGAGCCGGCGGAGCTCGCGACACTCTTTCCCTTTTTTTTTT	37964.9
UDG_UG_f1CA_f2ATG	20468	61192	61949	0	CGCGAGCTCCAUATGCTCGCGGGAACGCGAGCATGTGGAGCTCGCGACACTCTTTCCCTTTTTTTTTT	71626.7
UDG_UG_f1GT_f2CCC	8709	26941	26941	0	CGCGAGCTCGTUCCCCTCGCGGGAACGCGAGGGGGACGAGCTCGCGACACTCTTTCCCTTTTTTTTTT	31748.5
UDG_UG_f1CC_f2GGT	7637	23943	23943	0	CGCGAGCTCCCUGGTCTCGCGGGAACGCGAGACCGGGGAGCTCGCGACACTCTTTCCCTTTTTTTTTT	28432
UDG_UG_f1TG_f2CTC	9384	29582	29582	0	CGCGAGCTCTGUCTCCTCGCGGGAACGCGAGGAGGCAGAGCTCGCGACACTCTTTCCCTTTTTTTTTT	35752.2
UDG_UG_f1CT_f2GAG	8585	26584	26584	0	CGCGAGCTCCTUGAGCTCGCGGGAACGCGAGCTCGAGGAGCTCGCGACACTCTTTCCCTTTTTTTTTT	32779.3
UDG_UG_f1CA_f2GTA	10578	32186	32186	0	CGCGAGCTCCAUGTACTCGCGGGAACGCGAGTACGTGGAGCTCGCGACACTCTTTCCCTTTTTTTTTT	40505.6
UDG_UG_f1GG_f2TAC	7768	23523	23523	0	CGCGAGCTCGGUTACCTCGCGGGAACGCGAGGTAGCCGAGCTCGCGACACTCTTTCCCTTTTTTTTTT	30583.4
UDG_UG_f1CT_f2GTA	10330	31943	31943	0	CGCGAGCTCCTUGTACTCGCGGGAACGCGAGTACGAGGAGCTCGCGACACTCTTTCCCTTTTTTTTTT	43206.1
UDG_UG_f1CC_f2TCG	7718	23053	23053	0	CGCGAGCTCCCUTCGCTCGCGGGAACGCGAGCGAGGGGAGCTCGCGACACTCTTTCCCTTTTTTTTTT	31789.1
UDG_UG_f1TC_f2GTC	7654	23475	23475	0	CGCGAGCTCTCUGTCCTCGCGGGAACGCGAGGACGGAGAGCTCGCGACACTCTTTCCCTTTTTTTTTT	33324.7
UDG_UG_f1AG_f2GAA	9504	29498	29498	0	CGCGAGCTCAGUGAACTCGCGGGAACGCGAGTTCGCTGAGCTCGCGACACTCTTTCCCTTTTTTTTTT	43227.7
UDG_UG_f1GA_f2TAA	8321	25516	25516	0	CGCGAGCTCGAUTAACTCGCGGGAACGCGAGTTAGTCGAGCTCGCGACACTCTTTCCCTTTTTTTTTT	39114.2
UDG_UG_f1AG_f2ATA	10505	32629	32629	0	CGCGAGCTCAGUATACTCGCGGGAACGCGAGTATGCTGAGCTCGCGACACTCTTTCCCTTTTTTTTTT	52582.5
UDG_UG_f1CT_f2ACT	6550	20158	20158	0	CGCGAGCTCCTUACTCTCGCGGGAACGCGAGAGTGAGGAGCTCGCGACACTCTTTCCCTTTTTTTTTT	34766.9
UDG_UG_f1AT_f2CGA	6420	19411	19411	0	CGCGAGCTCATUCGACTCGCGGGAACGCGAGTCGGATGAGCTCGCGACACTCTTTCCCTTTTTTTTTT	33478.6
UDG_UG_f1AC_f2ACT	4849	14782	14782	0	CGCGAGCTCACUACTCTCGCGGGAACGCGAGAGTGGTGAGCTCGCGACACTCTTTCCCTTTTTTTTTT	25494.8
UDG_UG_f1TG_f2CGG	4508	13596	13596	0	CGCGAGCTCTGUCGGCTCGCGGGAACGCGAGCCGGCAGAGCTCGCGACACTCTTTCCCTTTTTTTTTT	23449.3
UDG_UG_f1GG_f2CGC	4632	13799	13799	0	CGCGAGCTCGGUCGCCTCGCGGGAACGCGAGGCGGCCGAGCTCGCGACACTCTTTCCCTTTTTTTTTT	23799.4
UDG_UG_f1CT_f2GCA	3710	11115	11115	0	CGCGAGCTCCTUGCACTCGCGGGAACGCGAGTGCGAGGAGCTCGCGACACTCTTTCCCTTTTTTTTTT	19170.3
UDG_UG_f1CA_f2TAG	2709	8074	8074	0	CGCGAGCTCCAUTAGCTCGCGGGAACGCGAGCTAGTGGAGCTCGCGACACTCTTTCCCTTTTTTTTTT	13925.4
UDG_UG_f1TG_f2ATT	8603	26662	26662	0	CGCGAGCTCTGUATTCTCGCGGGAACGCGAGAATGCAGAGCTCGCGACACTCTTTCCCTTTTTTTTTT	45984.5
UDG_UG_f1AT_f2GCC	16816	51227	50888	0	CGCGAGCTCATUGCCCTCGCGGGAACGCGAGGGCGATGAGCTCGCGACACTCTTTCCCTTTTTTTTTT	42156.6
UDG_UG_f1AA_f2GAA	16218	51521	49076	0	CGCGAGCTCAAUGAACTCGCGGGAACGCGAGTTCGTTGAGCTCGCGACACTCTTTCCCTTTTTTTTTT	40655.5
UDG_UG_f1CG_f2GCT	18381	56139	55628	0	CGCGAGCTCCGUGCTCTCGCGGGAACGCGAGAGCGCGGAGCTCGCGACACTCTTTCCCTTTTTTTTTT	46083.4
UDG_UG_f1GG_f2TCC	13847	42919	42919	0	CGCGAGCTCGGUTCCCTCGCGGGAACGCGAGGGAGCCGAGCTCGCGACACTCTTTCCCTTTTTTTTTT	35555
UDG_UG_f1AA_f2AAT	21020	63995	63621	0	CGCGAGCTCAAUAATCTCGCGGGAACGCGAGATTGTTGAGCTCGCGACACTCTTTCCCTTTTTTTTTT	52704.9
UDG_UG_f1TT_f2CAA	13329	42349	42349	0	CGCGAGCTCTTUCAACTCGCGGGAACGCGAGTTGGAAGAGCTCGCGACACTCTTTCCCTTTTTTTTTT	35082.8
UDG_UG_f1GA_f2TTA	15027	47358	47358	0	CGCGAGCTCGAUTTACTCGCGGGAACGCGAGTAAGTCGAGCTCGCGACACTCTTTCCCTTTTTTTTTT	39232.3
UDG_UG_f1CC_f2GTG	13453	40747	40747	0	CGCGAGCTCCCUGTGCTCGCGGGAACGCGAGCACGGGGAGCTCGCGACACTCTTTCCCTTTTTTTTTT	33755.6
UDG_UG_f1AA_f2TTT	16652	50693	50391	0	CGCGAGCTCAAUTTTCTCGCGGGAACGCGAGAAAGTTGAGCTCGCGACACTCTTTCCCTTTTTTTTTT	41814.9
UDG_UG_f1AT_f2GGT	13299	41493	41493	0	CGCGAGCTCATUGGTCTCGCGGGAACGCGAGACCGATGAGCTCGCGACACTCTTTCCCTTTTTTTTTT	34453.5
UDG_UG_f1AG_f2CCC	13203	40447	40447	0	CGCGAGCTCAGUCCCCTCGCGGGAACGCGAGGGGGCTGAGCTCGCGACACTCTTTCCCTTTTTTTTTT	34025.3
UDG_UG_f1GT_f2AGT	16256	50155	49192	0	CGCGAGCTCGTUAGTCTCGCGGGAACGCGAGACTGACGAGCTCGCGACACTCTTTCCCTTTTTTTTTT	41223.2
UDG_UG_f1CG_f2TGG	11889	37618	37618	0	CGCGAGCTCCGUTGGCTCGCGGGAACGCGAGCCAGCGGAGCTCGCGACACTCTTTCCCTTTTTTTTTT	31409.3
UDG_UG_f1GA_f2AGA	16204	53300	49034	0	CGCGAGCTCGAUAGACTCGCGGGAACGCGAGTCTGTCGAGCTCGCGACACTCTTTCCCTTTTTTTTTT	40524.1
UDG_UG_f1CA_f2CAA	12732	41646	41646	0	CGCGAGCTCCAUCAACTCGCGGGAACGCGAGTTGGTGGAGCTCGCGACACTCTTTCCCTTTTTTTTTT	34558.2
UDG_UG_f1TT_f2GCC	11326	37689	37689	0	CGCGAGCTCTTUGCCCTCGCGGGAACGCGAGGGCGAAGAGCTCGCGACACTCTTTCCCTTTTTTTTTT	31148
UDG_random_6b_9	10712	34380	34380	0	CGCGAGCTCGATATACTCGCGGGAACGCGAGTATATCGAGCTCGCGACACTCTTTCCCTTTTTTTTTT	28410.1
UDG_UG_f1TA_f2ATC	20662	64712	62536	0	CGCGAGCTCTAUATCCTCGCGGGAACGCGAGGATGTAGAGCTCGCGACACTCTTTCCCTTTTTTTTTT	51352.6
UDG_UG_f1CA_f2GGT	13006	43508	43508	0	CGCGAGCTCCAUGGTCTCGCGGGAACGCGAGACCGTGGAGCTCGCGACACTCTTTCCCTTTTTTTTTT	35727.4
UDG_UG_f1TA_f2CTC	12172	40546	40546	0	CGCGAGCTCTAUCTCCTCGCGGGAACGCGAGGAGGTAGAGCTCGCGACACTCTTTCCCTTTTTTTTTT	33466.7
UDG_UG_f1TT_f2AGC	14889	45600	45600	0	CGCGAGCTCTTUAGCCTCGCGGGAACGCGAGGCTGAAGAGCTCGCGACACTCTTTCCCTTTTTTTTTT	37918.9
UDG_UG_f1AG_f2TGT	11677	37396	37396	0	CGCGAGCTCAGUTGTCTCGCGGGAACGCGAGACAGCTGAGCTCGCGACACTCTTTCCCTTTTTTTTTT	31458.7
UDG_UG_f1TA_f2TGC	11878	35955	35955	0	CGCGAGCTCTAUTGCCTCGCGGGAACGCGAGGCAGTAGAGCTCGCGACACTCTTTCCCTTTTTTTTTT	30204.8
UDG_UG_f1GA_f2GCC	17541	52960	53084	0	CGCGAGCTCGAUGCCCTCGCGGGAACGCGAGGGCGTCGAGCTCGCGACACTCTTTCCCTTTTTTTTTT	44821.4
UDG_UG_f1TG_f2CAA	16067	50026	48619	0	CGCGAGCTCTGUCAACTCGCGGGAACGCGAGTTGGCAGAGCTCGCGACACTCTTTCCCTTTTTTTTTT	40843.5
UDG_UG_f1AC_f2TGT	12657	41567	41567	0	CGCGAGCTCACUTGTCTCGCGGGAACGCGAGACAGGTGAGCTCGCGACACTCTTTCCCTTTTTTTTTT	34919.3
UDG_UG_f1AA_f2ACG	17667	56883	53465	0	CGCGAGCTCAAUACGCTCGCGGGAACGCGAGCGTGTTGAGCTCGCGACACTCTTTCCCTTTTTTTTTT	45263.5
UDG_UG_f1CC_f2GAT	10722	34737	34737	0	CGCGAGCTCCCUGATCTCGCGGGAACGCGAGATCGGGGAGCTCGCGACACTCTTTCCCTTTTTTTTTT	29967
UDG_UG_f1TA_f2CAG	13487	42192	42192	0	CGCGAGCTCTAUCAGCTCGCGGGAACGCGAGCTGGTAGAGCTCGCGACACTCTTTCCCTTTTTTTTTT	36671.6
UDG_UG_f1GA_f2CGA	12760	41008	41008	0	CGCGAGCTCGAUCGACTCGCGGGAACGCGAGTCGGTCGAGCTCGCGACACTCTTTCCCTTTTTTTTTT	35970.7
UDG_UG_f1GA_f2CCT	10756	33621	33621	0	CGCGAGCTCGAUCCTCTCGCGGGAACGCGAGAGGGTCGAGCTCGCGACACTCTTTCCCTTTTTTTTTT	29607.2
UDG_UT_randomFlank	24599	65535	74461	0	CGCGAGCTCACUCTACGCGCGGGAACGCGCGTAGTGTGAGCTCGCGACACTCTTTCCCTTTTTTTTTT	66687.5
UDG_UG_f1GT_f2ACG	16240	51797	49143	0	CGCGAGCTCGTUACGCTCGCGGGAACGCGAGCGTGACGAGCTCGCGACACTCTTTCCCTTTTTTTTTT	44241.9
UDG_UG_f1AA_f2GCT	15538	51064	47017	0	CGCGAGCTCAAUGCTCTCGCGGGAACGCGAGAGCGTTGAGCTCGCGACACTCTTTCCCTTTTTTTTTT	42310.5
UDG_UG_f1AG_f2CCG	11152	34621	34621	0	CGCGAGCTCAGUCCGCTCGCGGGAACGCGAGCGGGCTGAGCTCGCGACACTCTTTCCCTTTTTTTTTT	31103.4
UDG_UG_f1CA_f2CAT	13266	43202	43202	0	CGCGAGCTCCAUCATCTCGCGGGAACGCGAGATGGTGGAGCTCGCGACACTCTTTCCCTTTTTTTTTT	38678.8
UDG_UG_f1CT_f2CCA	12881	40255	40255	0	CGCGAGCTCCTUCCACTCGCGGGAACGCGAGTGGGAGGAGCTCGCGACACTCTTTCCCTTTTTTTTTT	36040.3
UDG_UG_f1CA_f2GAA	14298	46111	46111	0	CGCGAGCTCCAUGAACTCGCGGGAACGCGAGTTCGTGGAGCTCGCGACACTCTTTCCCTTTTTTTTTT	41401.9
UDG_UG_f1AC_f2GTC	13150	41325	41325	0	CGCGAGCTCACUGTCCTCGCGGGAACGCGAGGACGGTGAGCTCGCGACACTCTTTCCCTTTTTTTTTT	37181.1
UDG_UG_f1CG_f2TGG	11572	37209	37209	0	CGCGAGCTCCGUTGGCTCGCGGGAACGCGAGCCAGCGGAGCTCGCGACACTCTTTCCCTTTTTTTTTT	33484.3
UDG_UG_f1CA_f2AAT	18509	57013	56015	0	CGCGAGCTCCAUAATCTCGCGGGAACGCGAGATTGTGGAGCTCGCGACACTCTTTCCCTTTTTTTTTT	51462.4
UDG_UG_f1AA_f2AAA	25114	65535	76021	0	CGCGAGCTCAAUAAACTCGCGGGAACGCGAGTTTGTTGAGCTCGCGACACTCTTTCCCTTTTTTTTTT	70158.2
UDG_UG_f1CA_f2CAT	12135	38672	38672	0	CGCGAGCTCCAUCATCTCGCGGGAACGCGAGATGGTGGAGCTCGCGACACTCTTTCCCTTTTTTTTTT	36330.4
UDG_UG_f1AT_f2GCT	12930	41783	41783	0	CGCGAGCTCATUGCTCTCGCGGGAACGCGAGAGCGATGAGCTCGCGACACTCTTTCCCTTTTTTTTTT	39922.3
UDG_UG_f1CG_f2ATT	29504	65535	89317	0	CGCGAGCTCCGUATTCTCGCGGGAACGCGAGAATGCGGAGCTCGCGACACTCTTTCCCTTTTTTTTTT	85588.3
UDG_UG_f1AC_f2TAG	9802	31564	31564	0	CGCGAGCTCACUTAGCTCGCGGGAACGCGAGCTAGGTGAGCTCGCGACACTCTTTCCCTTTTTTTTTT	30315.9
UDG_UG_f1GG_f2CTT	11903	38357	38357	0	CGCGAGCTCGGUCTTCTCGCGGGAACGCGAGAAGGCCGAGCTCGCGACACTCTTTCCCTTTTTTTTTT	37599.5
UDG_UG_f1CG_f2GGA	12445	37899	37899	0	CGCGAGCTCCGUGGACTCGCGGGAACGCGAGTCCGCGGAGCTCGCGACACTCTTTCCCTTTTTTTTTT	37150.5
UDG_UG_f1TA_f2TGG	10957	34054	34054	0	CGCGAGCTCTAUTGGCTCGCGGGAACGCGAGCCAGTAGAGCTCGCGACACTCTTTCCCTTTTTTTTTT	34692.3
UDG_UG_f1AG_f2TCG	10586	33323	33323	0	CGCGAGCTCAGUTCGCTCGCGGGAACGCGAGCGAGCTGAGCTCGCGACACTCTTTCCCTTTTTTTTTT	34450.1
UDG_UG_f1CC_f2GTG	10824	32297	32297	0	CGCGAGCTCCCUGTGCTCGCGGGAACGCGAGCACGGGGAGCTCGCGACACTCTTTCCCTTTTTTTTTT	34737
UDG_UG_f1TA_f2GGT	9737	30934	30934	0	CGCGAGCTCTAUGGTCTCGCGGGAACGCGAGACCGTAGAGCTCGCGACACTCTTTCCCTTTTTTTTTT	34216
UDG_UG_f1TC_f2GGC	9124	27810	27810	0	CGCGAGCTCTCUGGCCTCGCGGGAACGCGAGGCCGGAGAGCTCGCGACACTCTTTCCCTTTTTTTTTT	31293.5
UDG_UG_f1AA_f2GTT	16788	52620	50803	0	CGCGAGCTCAAUGTTCTCGCGGGAACGCGAGAACGTTGAGCTCGCGACACTCTTTCCCTTTTTTTTTT	57703.2
UDG_UG_f1TT_f2ATG	21454	64365	64935	0	CGCGAGCTCTTUATGCTCGCGGGAACGCGAGCATGAAGAGCTCGCGACACTCTTTCCCTTTTTTTTTT	75079.1
UDG_UG_f1AC_f2GGG	7933	24674	24674	0	CGCGAGCTCACUGGGCTCGCGGGAACGCGAGCCCGGTGAGCTCGCGACACTCTTTCCCTTTTTTTTTT	29273.8
UDG_UG_f1AG_f2TAG	8908	28314	28314	0	CGCGAGCTCAGUTAGCTCGCGGGAACGCGAGCTAGCTGAGCTCGCGACACTCTTTCCCTTTTTTTTTT	33699
UDG_UG_f1GA_f2GCA	10290	32696	32696	0	CGCGAGCTCGAUGCACTCGCGGGAACGCGAGTGCGTCGAGCTCGCGACACTCTTTCCCTTTTTTTTTT	39761.5
UDG_UG_f1GT_f2GCG	10610	32211	32211	0	CGCGAGCTCGTUGCGCTCGCGGGAACGCGAGCGCGACGAGCTCGCGACACTCTTTCCCTTTTTTTTTT	39980.4
UDG_UG_f1GA_f2TAA	8872	27089	27089	0	CGCGAGCTCGAUTAACTCGCGGGAACGCGAGTTAGTCGAGCTCGCGACACTCTTTCCCTTTTTTTTTT	34116.5
UDG_UG_f1TT_f2CGA	8520	25374	25374	0	CGCGAGCTCTTUCGACTCGCGGGAACGCGAGTCGGAAGAGCTCGCGACACTCTTTCCCTTTTTTTTTT	32971.6
UDG_UG_f1TA_f2CCG	8299	25481	25481	0	CGCGAGCTCTAUCCGCTCGCGGGAACGCGAGCGGGTAGAGCTCGCGACACTCTTTCCCTTTTTTTTTT	34391.7
UDG_UG_f1TA_f2GCG	9323	29520	29520	0	CGCGAGCTCTAUGCGCTCGCGGGAACGCGAGCGCGTAGAGCTCGCGACACTCTTTCCCTTTTTTTTTT	40484.4
UDG_UG_f1AG_f2CGA	8067	25094	25094	0	CGCGAGCTCAGUCGACTCGCGGGAACGCGAGTCGGCTGAGCTCGCGACACTCTTTCCCTTTTTTTTTT	35471.2
UDG_UG_f1AA_f2TGG	7534	22903	22903	0	CGCGAGCTCAAUTGGCTCGCGGGAACGCGAGCCAGTTGAGCTCGCGACACTCTTTCCCTTTTTTTTTT	33474.6
UDG_UG_f1CT_f2ACT	7183	21349	21349	0	CGCGAGCTCCTUACTCTCGCGGGAACGCGAGAGTGAGGAGCTCGCGACACTCTTTCCCTTTTTTTTTT	32376.5
UDG_UG_f1TG_f2GAC	6415	19516	19516	0	CGCGAGCTCTGUGACCTCGCGGGAACGCGAGGTCGCAGAGCTCGCGACACTCTTTCCCTTTTTTTTTT	31349.9
UDG_UG_f1GC_f2GCA	5602	17169	17169	0	CGCGAGCTCGCUGCACTCGCGGGAACGCGAGTGCGGCGAGCTCGCGACACTCTTTCCCTTTTTTTTTT	28843.1
UDG_UG_f1AC_f2CGT	4980	15324	15324	0	CGCGAGCTCACUCGTCTCGCGGGAACGCGAGACGGGTGAGCTCGCGACACTCTTTCCCTTTTTTTTTT	25743.6
UDG_UG_f1GC_f2CGA	5145	15649	15649	0	CGCGAGCTCGCUCGACTCGCGGGAACGCGAGTCGGGCGAGCTCGCGACACTCTTTCCCTTTTTTTTTT	26289.6
UDG_UG_f1TG_f2AGT	8488	25843	25843	0	CGCGAGCTCTGUAGTCTCGCGGGAACGCGAGACTGCAGAGCTCGCGACACTCTTTCCCTTTTTTTTTT	43415
UDG_UG_f1TT_f2GGC	4487	13459	13459	0	CGCGAGCTCTTUGGCCTCGCGGGAACGCGAGGCCGAAGAGCTCGCGACACTCTTTCCCTTTTTTTTTT	22610.5
UDG_UG_f1GA_f2CAT	3785	11306	11306	0	CGCGAGCTCGAUCATCTCGCGGGAACGCGAGATGGTCGAGCTCGCGACACTCTTTCCCTTTTTTTTTT	18993.6
UDG_UG_f1CA_f2GGA	3463	10355	10355	0	CGCGAGCTCCAUGGACTCGCGGGAACGCGAGTCCGTGGAGCTCGCGACACTCTTTCCCTTTTTTTTTT	17395.9
UDG_UG_f1TG_f2AAC	7087	20633	20633	0	CGCGAGCTCTGUAACCTCGCGGGAACGCGAGGTTGCAGAGCTCGCGACACTCTTTCCCTTTTTTTTTT	34662.5
UDG_UG_f1AA_f2ATA	30802	65535	93249	0	CGCGAGCTCAAUATACTCGCGGGAACGCGAGTATGTTGAGCTCGCGACACTCTTTCCCTTTTTTTTTT	77378.8
UDG_UG_f1CT_f2CGA	14229	44845	44845	0	CGCGAGCTCCTUCGACTCGCGGGAACGCGAGTCGGAGGAGCTCGCGACACTCTTTCCCTTTTTTTTTT	37212.7
UDG_UG_f1CA_f2ATA	22295	65535	67483	0	CGCGAGCTCCAUATACTCGCGGGAACGCGAGTATGTGGAGCTCGCGACACTCTTTCCCTTTTTTTTTT	55997.9
UDG_UG_f1GA_f2CGA	14015	43164	43164	0	CGCGAGCTCGAUCGACTCGCGGGAACGCGAGTCGGTCGAGCTCGCGACACTCTTTCCCTTTTTTTTTT	35817.8
UDG_UG_f1TT_f2TGA	10440	32589	32589	0	CGCGAGCTCTTUTGACTCGCGGGAACGCGAGTCAGAAGAGCTCGCGACACTCTTTCCCTTTTTTTTTT	27042.6
UDG_UG_f1GC_f2TAC	11103	34442	34442	0	CGCGAGCTCGCUTACCTCGCGGGAACGCGAGGTAGGCGAGCTCGCGACACTCTTTCCCTTTTTTTTTT	28580.2
UDG_UG_f1TG_f2GAT	14428	46050	46050	0	CGCGAGCTCTGUGATCTCGCGGGAACGCGAGATCGCAGAGCTCGCGACACTCTTTCCCTTTTTTTTTT	38212.7
UDG_UG_f1CT_f2TCA	12804	38964	38964	0	CGCGAGCTCCTUTCACTCGCGGGAACGCGAGTGAGAGGAGCTCGCGACACTCTTTCCCTTTTTTTTTT	32332.6
UDG_UG_f1GT_f2AAC	23518	65516	71187	0	CGCGAGCTCGTUAACCTCGCGGGAACGCGAGGTTGACGAGCTCGCGACACTCTTTCCCTTTTTTTTTT	59109.8
UDG_UG_f1CC_f2TCT	12755	38832	38832	0	CGCGAGCTCCCUTCTCTCGCGGGAACGCGAGAGAGGGGAGCTCGCGACACTCTTTCCCTTTTTTTTTT	32244
UDG_UG_f1GA_f2GAT	15297	45294	45294	0	CGCGAGCTCGAUGATCTCGCGGGAACGCGAGATCGTCGAGCTCGCGACACTCTTTCCCTTTTTTTTTT	38046.8
UDG_UG_f1CG_f2ATC	30098	65535	91116	0	CGCGAGCTCCGUATCCTCGCGGGAACGCGAGGATGCGGAGCTCGCGACACTCTTTCCCTTTTTTTTTT	76259.5
UDG_UG_f1CG_f2ACC	20809	62565	62982	0	CGCGAGCTCCGUACCCTCGCGGGAACGCGAGGGTGCGGAGCTCGCGACACTCTTTCCCTTTTTTTTTT	52587.2
UDG_UG_f1AA_f2CGG	13246	43177	43177	0	CGCGAGCTCAAUCGGCTCGCGGGAACGCGAGCCGGTTGAGCTCGCGACACTCTTTCCCTTTTTTTTTT	35679.6
UDG_UG_f1GG_f2AGT	20718	64554	62706	0	CGCGAGCTCGGUAGTCTCGCGGGAACGCGAGACTGCCGAGCTCGCGACACTCTTTCCCTTTTTTTTTT	51823.3
UDG_UG_f1GA_f2CCC	9901	32071	32071	0	CGCGAGCTCGAUCCCCTCGCGGGAACGCGAGGGGGTCGAGCTCGCGACACTCTTTCCCTTTTTTTTTT	26471.5
UDG_UG_f1AA_f2ATT	38691	65535	117143	0	CGCGAGCTCAAUATTCTCGCGGGAACGCGAGAATGTTGAGCTCGCGACACTCTTTCCCTTTTTTTTTT	96175.1
UDG_UG_f1CA_f2CTG	13925	45405	45405	0	CGCGAGCTCCAUCTGCTCGCGGGAACGCGAGCAGGTGGAGCTCGCGACACTCTTTCCCTTTTTTTTTT	37241.5
UDG_UG_f1GA_f2AAC	23866	65535	72241	0	CGCGAGCTCGAUAACCTCGCGGGAACGCGAGGTTGTCGAGCTCGCGACACTCTTTCCCTTTTTTTTTT	59310.3
UDG_UG_f1AT_f2GAA	14440	46656	46656	0	CGCGAGCTCATUGAACTCGCGGGAACGCGAGTTCGATGAGCTCGCGACACTCTTTCCCTTTTTTTTTT	38304.8
UDG_UG_f1CA_f2AGA	18348	55859	55528	0	CGCGAGCTCCAUAGACTCGCGGGAACGCGAGTCTGTGGAGCTCGCGACACTCTTTCCCTTTTTTTTTT	46161.1
UDG_UG_f1TG_f2GTT	16962	55176	51330	0	CGCGAGCTCTGUGTTCTCGCGGGAACGCGAGAACGCAGAGCTCGCGACACTCTTTCCCTTTTTTTTTT	43117
UDG_UG_f1CA_f2TGC	11977	37894	37894	0	CGCGAGCTCCAUTGCCTCGCGGGAACGCGAGGCAGTGGAGCTCGCGACACTCTTTCCCTTTTTTTTTT	31736.8
UDG_UG_f1AC_f2TAA	20984	63723	63512	0	CGCGAGCTCACUTAACTCGCGGGAACGCGAGTTAGGTGAGCTCGCGACACTCTTTCCCTTTTTTTTTT	53626.3
UDG_UG_f1CT_f2ATG	29434	65535	89105	0	CGCGAGCTCCTUATGCTCGCGGGAACGCGAGCATGAGGAGCTCGCGACACTCTTTCCCTTTTTTTTTT	74854.6
UDG_UG_f1CA_f2ATG	24898	65535	75367	0	CGCGAGCTCCAUATGCTCGCGGGAACGCGAGCATGTGGAGCTCGCGACACTCTTTCCCTTTTTTTTTT	63478.8
UDG_UG_f1CG_f2CCG	12507	39609	39609	0	CGCGAGCTCCGUCCGCTCGCGGGAACGCGAGCGGGCGGAGCTCGCGACACTCTTTCCCTTTTTTTTTT	33722.8
UDG_UG_f1GA_f2TGA	11665	37897	37897	0	CGCGAGCTCGAUTGACTCGCGGGAACGCGAGTCAGTCGAGCTCGCGACACTCTTTCCCTTTTTTTTTT	32729.5
UDG_UG_f1TA_f2CAG	10759	36425	36425	0	CGCGAGCTCTAUCAGCTCGCGGGAACGCGAGCTGGTAGAGCTCGCGACACTCTTTCCCTTTTTTTTTT	31882.2
UDG_UG_f1TC_f2AGT	11703	38814	38814	0	CGCGAGCTCTCUAGTCTCGCGGGAACGCGAGACTGGAGAGCTCGCGACACTCTTTCCCTTTTTTTTTT	34176.1
UDG_UG_f1CA_f2TAT	12918	43158	43158	0	CGCGAGCTCCAUTATCTCGCGGGAACGCGAGATAGTGGAGCTCGCGACACTCTTTCCCTTTTTTTTTT	38520.6
UDG_UG_f1GC_f2TCA	9845	32429	32429	0	CGCGAGCTCGCUTCACTCGCGGGAACGCGAGTGAGGCGAGCTCGCGACACTCTTTCCCTTTTTTTTTT	29153.1
UDG_UG_f1CA_f2CTT	12820	42230	42230	0	CGCGAGCTCCAUCTTCTCGCGGGAACGCGAGAAGGTGGAGCTCGCGACACTCTTTCCCTTTTTTTTTT	38018.4
UDG_UG_f1AT_f2TGG	11583	38765	38765	0	CGCGAGCTCATUTGGCTCGCGGGAACGCGAGCCAGATGAGCTCGCGACACTCTTTCCCTTTTTTTTTT	34877.8
UDG_UG_f1AG_f2TTA	13785	42938	42938	0	CGCGAGCTCAGUTTACTCGCGGGAACGCGAGTAAGCTGAGCTCGCGACACTCTTTCCCTTTTTTTTTT	38544.6
UDG_UG_f1TA_f2CCG	11382	36412	36412	0	CGCGAGCTCTAUCCGCTCGCGGGAACGCGAGCGGGTAGAGCTCGCGACACTCTTTCCCTTTTTTTTTT	32064.9
UDG_UG_f1CG_f2TTC	14653	46885	46885	0	CGCGAGCTCCGUTTCCTCGCGGGAACGCGAGGAAGCGGAGCTCGCGACACTCTTTCCCTTTTTTTTTT	41656.9
UDG_UG_f1TG_f2CCG	11803	37663	37663	0	CGCGAGCTCTGUCCGCTCGCGGGAACGCGAGCGGGCAGAGCTCGCGACACTCTTTCCCTTTTTTTTTT	33719.7
UDG_UG_f1GT_f2GCC	15091	46266	46266	0	CGCGAGCTCGTUGCCCTCGCGGGAACGCGAGGGCGACGAGCTCGCGACACTCTTTCCCTTTTTTTTTT	41541.1
UDG_UG_f1AT_f2CTT	18890	60081	57169	0	CGCGAGCTCATUCTTCTCGCGGGAACGCGAGAAGGATGAGCTCGCGACACTCTTTCCCTTTTTTTTTT	51394
UDG_UG_f1TT_f2AAT	19426	62127	58793	0	CGCGAGCTCTTUAATCTCGCGGGAACGCGAGATTGAAGAGCTCGCGACACTCTTTCCCTTTTTTTTTT	53590.5
UDG_UG_f1CA_f2ACC	18577	57438	56221	0	CGCGAGCTCCAUACCCTCGCGGGAACGCGAGGGTGTGGAGCTCGCGACACTCTTTCCCTTTTTTTTTT	51571.3
UDG_UG_f1GT_f2ATT	24675	65535	74691	0	CGCGAGCTCGTUATTCTCGCGGGAACGCGAGAATGACGAGCTCGCGACACTCTTTCCCTTTTTTTTTT	69309.6
UDG_UG_f1GA_f2AGC	16977	53469	51375	0	CGCGAGCTCGAUAGCCTCGCGGGAACGCGAGGCTGTCGAGCTCGCGACACTCTTTCCCTTTTTTTTTT	48635.6
UDG_UG_f1TT_f2GTA	16578	54326	50167	0	CGCGAGCTCTTUGTACTCGCGGGAACGCGAGTACGAAGAGCTCGCGACACTCTTTCCCTTTTTTTTTT	48015.7
UDG_UG_f1GT_f2ACC	13501	44282	44282	0	CGCGAGCTCGTUACCCTCGCGGGAACGCGAGGGTGACGAGCTCGCGACACTCTTTCCCTTTTTTTTTT	42396.2
UDG_UG_f1GA_f2AAC	24069	65535	72856	0	CGCGAGCTCGAUAACCTCGCGGGAACGCGAGGTTGTCGAGCTCGCGACACTCTTTCCCTTTTTTTTTT	70483.5
UDG_UG_f1GA_f2ACC	11981	36053	36053	0	CGCGAGCTCGAUACCCTCGCGGGAACGCGAGGGTGTCGAGCTCGCGACACTCTTTCCCTTTTTTTTTT	34950.9
UDG_UG_f1CG_f2TCC	10240	31525	31525	0	CGCGAGCTCCGUTCCCTCGCGGGAACGCGAGGGAGCGGAGCTCGCGACACTCTTTCCCTTTTTTTTTT	32109.7
UDG_UG_f1CT_f2CTT	12626	39777	39777	0	CGCGAGCTCCTUCTTCTCGCGGGAACGCGAGAAGGAGGAGCTCGCGACACTCTTTCCCTTTTTTTTTT	41122.5
UDG_UG_f1GA_f2ACT	14073	42636	42636	0	CGCGAGCTCGAUACTCTCGCGGGAACGCGAGAGTGTCGAGCTCGCGACACTCTTTCCCTTTTTTTTTT	46187.3
UDG_UG_f1AT_f2ATC	22083	65096	66840	0	CGCGAGCTCATUATCCTCGCGGGAACGCGAGGATGATGAGCTCGCGACACTCTTTCCCTTTTTTTTTT	73823.9
UDG_UG_f1AG_f2TTA	10652	32728	32728	0	CGCGAGCTCAGUTTACTCGCGGGAACGCGAGTAAGCTGAGCTCGCGACACTCTTTCCCTTTTTTTTTT	36857.7
UDG_UG_f1TA_f2GCG	9877	30555	30555	0	CGCGAGCTCTAUGCGCTCGCGGGAACGCGAGCGCGTAGAGCTCGCGACACTCTTTCCCTTTTTTTTTT	34784.8
UDG_UG_f1AT_f2AAC	13072	40497	40497	0	CGCGAGCTCATUAACCTCGCGGGAACGCGAGGTTGATGAGCTCGCGACACTCTTTCCCTTTTTTTTTT	46981.4
UDG_UG_f1TA_f2GCG	9990	30739	30739	0	CGCGAGCTCTAUGCGCTCGCGGGAACGCGAGCGCGTAGAGCTCGCGACACTCTTTCCCTTTTTTTTTT	36469.5
UDG_UG_f1TG_f2GTG	13007	40776	40776	0	CGCGAGCTCTGUGTGCTCGCGGGAACGCGAGCACGCAGAGCTCGCGACACTCTTTCCCTTTTTTTTTT	48842.5
UDG_UG_f1AT_f2GGG	9812	31313	31313	0	CGCGAGCTCATUGGGCTCGCGGGAACGCGAGCCCGATGAGCTCGCGACACTCTTTCCCTTTTTTTTTT	38237.3
UDG_UG_f1AA_f2TCA	9762	31285	31285	0	CGCGAGCTCAAUTCACTCGCGGGAACGCGAGTGAGTTGAGCTCGCGACACTCTTTCCCTTTTTTTTTT	38851.9
UDG_UG_f1AT_f2TCC	9143	28405	28405	0	CGCGAGCTCATUTCCCTCGCGGGAACGCGAGGGAGATGAGCTCGCGACACTCTTTCCCTTTTTTTTTT	35855.4
UDG_UG_f1TA_f2CAA	7834	24786	24786	0	CGCGAGCTCTAUCAACTCGCGGGAACGCGAGTTGGTAGAGCTCGCGACACTCTTTCCCTTTTTTTTTT	32225.5
UDG_UG_f1AT_f2GGT	9263	28596	28596	0	CGCGAGCTCATUGGTCTCGCGGGAACGCGAGACCGATGAGCTCGCGACACTCTTTCCCTTTTTTTTTT	38596
UDG_UG_f1CA_f2AAA	14046	42553	42553	0	CGCGAGCTCCAUAAACTCGCGGGAACGCGAGTTTGTGGAGCTCGCGACACTCTTTCCCTTTTTTTTTT	58347.4
UDG_UG_f1TG_f2ATT	16038	47991	47991	0	CGCGAGCTCTGUATTCTCGCGGGAACGCGAGAATGCAGAGCTCGCGACACTCTTTCCCTTTTTTTTTT	67618.2
UDG_UG_f1CA_f2CCA	5753	17600	17600	0	CGCGAGCTCCAUCCACTCGCGGGAACGCGAGTGGGTGGAGCTCGCGACACTCTTTCCCTTTTTTTTTT	25626.1
UDG_UG_f1TT_f2CTT	7529	23015	23015	0	CGCGAGCTCTTUCTTCTCGCGGGAACGCGAGAAGGAAGAGCTCGCGACACTCTTTCCCTTTTTTTTTT	34609.1
UDG_UG_f1AT_f2GGC	7203	22751	22751	0	CGCGAGCTCATUGGCCTCGCGGGAACGCGAGGCCGATGAGCTCGCGACACTCTTTCCCTTTTTTTTTT	36382.9
UDG_UG_f1AT_f2AAC	8533	26170	26170	0	CGCGAGCTCATUAACCTCGCGGGAACGCGAGGTTGATGAGCTCGCGACACTCTTTCCCTTTTTTTTTT	43964.4
UDG_UG_f1GG_f2TGT	5791	17648	17648	0	CGCGAGCTCGGUTGTCTCGCGGGAACGCGAGACAGCCGAGCTCGCGACACTCTTTCCCTTTTTTTTTT	29647.8
UDG_MM_CC	5131	15985	15985	0	CGCGAGCTCACCCTTACCGCGGGAACGCGGTAAGCGTGAGCTCGCGACACTCTTTCCCTTTTTTTTTT	26854.1
UDG_UG_f1TG_f2CAA	5435	16355	16355	0	CGCGAGCTCTGUCAACTCGCGGGAACGCGAGTTGGCAGAGCTCGCGACACTCTTTCCCTTTTTTTTTT	27475.6
UDG_UG_f1AG_f2CAT	4235	12489	12489	0	CGCGAGCTCAGUCATCTCGCGGGAACGCGAGATGGCTGAGCTCGCGACACTCTTTCCCTTTTTTTTTT	20980.9
UDG_UG_f1CG_f2CAT	4064	12118	12118	0	CGCGAGCTCCGUCATCTCGCGGGAACGCGAGATGGCGGAGCTCGCGACACTCTTTCCCTTTTTTTTTT	20357.7
UDG_UG_f1TT_f2AGA	3878	11441	11441	0	CGCGAGCTCTTUAGACTCGCGGGAACGCGAGTCTGAAGAGCTCGCGACACTCTTTCCCTTTTTTTTTT	19220.4
UDG_UG_f1AG_f2CTT	2936	8524	8524	0	CGCGAGCTCAGUCTTCTCGCGGGAACGCGAGAAGGCTGAGCTCGCGACACTCTTTCCCTTTTTTTTTT	14319.9
UDG_UG_f1CG_f2GGA	15121	47263	47263	0	CGCGAGCTCCGUGGACTCGCGGGAACGCGAGTCCGCGGAGCTCGCGACACTCTTTCCCTTTTTTTTTT	39056.1
UDG_random_6b_4	12090	37443	37443	0	CGCGAGCTCTCACGCCTCGCGGGAACGCGAGGCGTGAGAGCTCGCGACACTCTTTCCCTTTTTTTTTT	30941.3
UDG_UG_f1AA_f2ACT	18234	57189	55183	0	CGCGAGCTCAAUACTCTCGCGGGAACGCGAGAGTGTTGAGCTCGCGACACTCTTTCCCTTTTTTTTTT	45600.8
UDG_UG_f1AC_f2CAC	10615	31982	31982	0	CGCGAGCTCACUCACCTCGCGGGAACGCGAGGTGGGTGAGCTCGCGACACTCTTTCCCTTTTTTTTTT	26428.5
UDG_UG_f1GA_f2TGA	12158	38002	38002	0	CGCGAGCTCGAUTGACTCGCGGGAACGCGAGTCAGTCGAGCTCGCGACACTCTTTCCCTTTTTTTTTT	31403.2
UDG_UG_f1TT_f2TTA	15400	50073	46599	0	CGCGAGCTCTTUTTACTCGCGGGAACGCGAGTAAGAAGAGCTCGCGACACTCTTTCCCTTTTTTTTTT	38507.4
UDG_UG_f1GC_f2CAC	11712	37184	37184	0	CGCGAGCTCGCUCACCTCGCGGGAACGCGAGGTGGGCGAGCTCGCGACACTCTTTCCCTTTTTTTTTT	30727.2
UDG_UG_f1GG_f2CTC	20355	61528	61607	0	CGCGAGCTCGGUCTCCTCGCGGGAACGCGAGGAGGCCGAGCTCGCGACACTCTTTCCCTTTTTTTTTT	50909.3
UDG_UG_f1AT_f2ATA	29933	65535	90617	0	CGCGAGCTCATUATACTCGCGGGAACGCGAGTATGATGAGCTCGCGACACTCTTTCCCTTTTTTTTTT	75194.7
UDG_UG_f1CG_f2ACG	21878	65144	66220	0	CGCGAGCTCCGUACGCTCGCGGGAACGCGAGCGTGCGGAGCTCGCGACACTCTTTCCCTTTTTTTTTT	54985.5
UDG_UG_f1GC_f2AGG	12965	43706	43706	0	CGCGAGCTCGCUAGGCTCGCGGGAACGCGAGCCTGGCGAGCTCGCGACACTCTTTCCCTTTTTTTTTT	36654.8
UDG_UG_f1AG_f2CAT	12707	40258	40258	0	CGCGAGCTCAGUCATCTCGCGGGAACGCGAGATGGCTGAGCTCGCGACACTCTTTCCCTTTTTTTTTT	33693.9
UDG_UG_f1TC_f2ACC	12033	39071	39071	0	CGCGAGCTCTCUACCCTCGCGGGAACGCGAGGGTGGAGAGCTCGCGACACTCTTTCCCTTTTTTTTTT	32700.4
UDG_UG_f1GC_f2GGT	12496	40523	40523	0	CGCGAGCTCGCUGGTCTCGCGGGAACGCGAGACCGGCGAGCTCGCGACACTCTTTCCCTTTTTTTTTT	33447.7
UDG_UG_f1AC_f2GGA	11881	37511	37511	0	CGCGAGCTCACUGGACTCGCGGGAACGCGAGTCCGGTGAGCTCGCGACACTCTTTCCCTTTTTTTTTT	30997.5
UDG_UG_f1TG_f2AAC	31982	65535	96823	0	CGCGAGCTCTGUAACCTCGCGGGAACGCGAGGTTGCAGAGCTCGCGACACTCTTTCCCTTTTTTTTTT	79917.9
UDG_UG_f1AC_f2ACA	11817	40288	40288	0	CGCGAGCTCACUACACTCGCGGGAACGCGAGTGTGGTGAGCTCGCGACACTCTTTCCCTTTTTTTTTT	33083.3
UDG_UG_random_5U	11444	37186	37186	0	CGCGCGAGUUAACUUUGCGCGGGAACGCGCGGGGTTGGCTCGCGCGACACTCTTTCCCTTTTTTTTTT	30536
UDG_UG_f1TG_f2GGT	13936	44952	44952	0	CGCGAGCTCTGUGGTCTCGCGGGAACGCGAGACCGCAGAGCTCGCGACACTCTTTCCCTTTTTTTTTT	37150.5
UDG_UG_f1AT_f2ACG	18582	60037	56237	0	CGCGAGCTCATUACGCTCGCGGGAACGCGAGCGTGATGAGCTCGCGACACTCTTTCCCTTTTTTTTTT	46477
UDG_UG_f1AA_f2CGG	14152	45469	45469	0	CGCGAGCTCAAUCGGCTCGCGGGAACGCGAGCCGGTTGAGCTCGCGACACTCTTTCCCTTTTTTTTTT	38055.2
UDG_UG_f1GA_f2AAA	27123	65535	82106	0	CGCGAGCTCGAUAAACTCGCGGGAACGCGAGTTTGTCGAGCTCGCGACACTCTTTCCCTTTTTTTTTT	69070.2
UDG_UG_f1CT_f2CGC	13766	41658	41658	0	CGCGAGCTCCTUCGCCTCGCGGGAACGCGAGGCGGAGGAGCTCGCGACACTCTTTCCCTTTTTTTTTT	34995.7
UDG_UG_f1AA_f2TGG	14887	47939	47939	0	CGCGAGCTCAAUTGGCTCGCGGGAACGCGAGCCAGTTGAGCTCGCGACACTCTTTCCCTTTTTTTTTT	40477.2
UDG_UG_f1GA_f2TGG	13377	42444	42444	0	CGCGAGCTCGAUTGGCTCGCGGGAACGCGAGCCAGTCGAGCTCGCGACACTCTTTCCCTTTTTTTTTT	35547.5
UDG_UG_f1AT_f2AAA	19791	62223	59898	0	CGCGAGCTCATUAAACTCGCGGGAACGCGAGTTTGATGAGCTCGCGACACTCTTTCCCTTTTTTTTTT	50449.8
UDG_UG_f1CC_f2ACC	11489	37032	37032	0	CGCGAGCTCCCUACCCTCGCGGGAACGCGAGGGTGGGGAGCTCGCGACACTCTTTCCCTTTTTTTTTT	31473.2
UDG_UG_f1GG_f2TCG	10568	34119	34119	0	CGCGAGCTCGGUTCGCTCGCGGGAACGCGAGCGAGCCGAGCTCGCGACACTCTTTCCCTTTTTTTTTT	29433.8
UDG_UG_f1CC_f2CCC	8838	27550	27550	0	CGCGAGCTCCCUCCCCTCGCGGGAACGCGAGGGGGGGGAGCTCGCGACACTCTTTCCCTTTTTTTTTT	24061.3
UDG_UG_f1GG_f2GTC	15930	51236	48204	0	CGCGAGCTCGGUGTCCTCGCGGGAACGCGAGGACGCCGAGCTCGCGACACTCTTTCCCTTTTTTTTTT	42200.1
UDG_UG_f1TG_f2CCT	12265	37642	37642	0	CGCGAGCTCTGUCCTCTCGCGGGAACGCGAGAGGGCAGAGCTCGCGACACTCTTTCCCTTTTTTTTTT	33144.2
UDG_UG_f1CG_f2CGA	12308	39580	39580	0	CGCGAGCTCCGUCGACTCGCGGGAACGCGAGTCGGCGGAGCTCGCGACACTCTTTCCCTTTTTTTTTT	35346.6
UDG_UG_f1CG_f2TAA	13079	41291	41291	0	CGCGAGCTCCGUTAACTCGCGGGAACGCGAGTTAGCGGAGCTCGCGACACTCTTTCCCTTTTTTTTTT	37079.6
UDG_UG_random_4U	9866	31271	31271	0	CGCGCUCUGUUCTGTCCCGCGGGAACGCGGGACAGGGCGGGGCGCGACACTCTTTCCCTTTTTTTTTT	27996.9
UDG_UG_f1GC_f2AAC	15436	48314	48314	0	CGCGAGCTCGCUAACCTCGCGGGAACGCGAGGTTGGCGAGCTCGCGACACTCTTTCCCTTTTTTTTTT	42580.3
UDG_UG_f1AC_f2CCG	9897	31378	31378	0	CGCGAGCTCACUCCGCTCGCGGGAACGCGAGCGGGGTGAGCTCGCGACACTCTTTCCCTTTTTTTTTT	27454.3
UDG_UG_f1CC_f2TGT	10472	32933	32933	0	CGCGAGCTCCCUTGTCTCGCGGGAACGCGAGACAGGGGAGCTCGCGACACTCTTTCCCTTTTTTTTTT	28971.8
UDG_UG_f1TG_f2TTT	18335	59861	55488	0	CGCGAGCTCTGUTTTCTCGCGGGAACGCGAGAAAGCAGAGCTCGCGACACTCTTTCCCTTTTTTTTTT	49336
UDG_UG_f1AA_f2AGT	28171	65535	85280	0	CGCGAGCTCAAUAGTCTCGCGGGAACGCGAGACTGTTGAGCTCGCGACACTCTTTCCCTTTTTTTTTT	76158.5
UDG_random_6b_5	13448	40434	40434	0	CGCGAGCTCTACTCGCTCGCGGGAACGCGAGCGAGTAGAGCTCGCGACACTCTTTCCCTTTTTTTTTT	36304.7
UDG_UG_f1TC_f2CAT	13955	43742	43742	0	CGCGAGCTCTCUCATCTCGCGGGAACGCGAGATGGGAGAGCTCGCGACACTCTTTCCCTTTTTTTTTT	39871.4
UDG_UG_f1GA_f2AAA	24506	65535	74179	0	CGCGAGCTCGAUAAACTCGCGGGAACGCGAGTTTGTCGAGCTCGCGACACTCTTTCCCTTTTTTTTTT	67615.1
UDG_UG_f1CA_f2CGC	13868	44158	44158	0	CGCGAGCTCCAUCGCCTCGCGGGAACGCGAGGCGGTGGAGCTCGCGACACTCTTTCCCTTTTTTTTTT	40572.1
UDG_UG_f1AG_f2GGA	13932	44299	44299	0	CGCGAGCTCAGUGGACTCGCGGGAACGCGAGTCCGCTGAGCTCGCGACACTCTTTCCCTTTTTTTTTT	41703.1
UDG_UG_f1AG_f2CGA	11515	36565	36565	0	CGCGAGCTCAGUCGACTCGCGGGAACGCGAGTCGGCTGAGCTCGCGACACTCTTTCCCTTTTTTTTTT	34909.7
UDG_UG_f1TG_f2AAG	22315	65535	67543	0	CGCGAGCTCTGUAAGCTCGCGGGAACGCGAGCTTGCAGAGCTCGCGACACTCTTTCCCTTTTTTTTTT	64646.6
UDG_UG_f1AC_f2AAA	16697	54533	50527	0	CGCGAGCTCACUAAACTCGCGGGAACGCGAGTTTGGTGAGCTCGCGACACTCTTTCCCTTTTTTTTTT	48811.7
UDG_UG_f1AT_f2CAT	11511	35927	35927	0	CGCGAGCTCATUCATCTCGCGGGAACGCGAGATGGATGAGCTCGCGACACTCTTTCCCTTTTTTTTTT	34828.7
UDG_UG_f1GC_f2TAA	9371	28921	28921	0	CGCGAGCTCGCUTAACTCGCGGGAACGCGAGTTAGGCGAGCTCGCGACACTCTTTCCCTTTTTTTTTT	28890.3
UDG_UG_f1AG_f2CTT	11352	35436	35436	0	CGCGAGCTCAGUCTTCTCGCGGGAACGCGAGAAGGCTGAGCTCGCGACACTCTTTCCCTTTTTTTTTT	36100.2
UDG_UG_f1CC_f2AGG	9979	30423	30423	0	CGCGAGCTCCCUAGGCTCGCGGGAACGCGAGCCTGGGGAGCTCGCGACACTCTTTCCCTTTTTTTTTT	32330.1
UDG_UG_f1TT_f2TTA	12052	38356	38356	0	CGCGAGCTCTTUTTACTCGCGGGAACGCGAGTAAGAAGAGCTCGCGACACTCTTTCCCTTTTTTTTTT	41789.7
UDG_UG_f1TT_f2GAG	9545	29928	29928	0	CGCGAGCTCTTUGAGCTCGCGGGAACGCGAGCTCGAAGAGCTCGCGACACTCTTTCCCTTTTTTTTTT	33310.6
UDG_UG_f1TT_f2GCG	10904	33343	33343	0	CGCGAGCTCTTUGCGCTCGCGGGAACGCGAGCGCGAAGAGCTCGCGACACTCTTTCCCTTTTTTTTTT	37317.3
UDG_MM_CT	8764	27770	27770	0	CGCGAGCTCACCCTTACCGCGGGAACGCGGTAAGTGTGAGCTCGCGACACTCTTTCCCTTTTTTTTTT	31784.7
UDG_UG_f1TC_f2CTT	9327	28025	28025	0	CGCGAGCTCTCUCTTCTCGCGGGAACGCGAGAAGGGAGAGCTCGCGACACTCTTTCCCTTTTTTTTTT	32512.3
UDG_UG_f1CA_f2AGT	12459	39396	39396	0	CGCGAGCTCCAUAGTCTCGCGGGAACGCGAGACTGTGGAGCTCGCGACACTCTTTCCCTTTTTTTTTT	46311.5
UDG_UG_f1CA_f2TCA	9677	31138	31138	0	CGCGAGCTCCAUTCACTCGCGGGAACGCGAGTGAGTGGAGCTCGCGACACTCTTTCCCTTTTTTTTTT	37541.1
UDG_UG_f1AT_f2TAC	9631	31297	31297	0	CGCGAGCTCATUTACCTCGCGGGAACGCGAGGTAGATGAGCTCGCGACACTCTTTCCCTTTTTTTTTT	38459.2
UDG_UG_f1AG_f2AGA	12942	40204	40204	0	CGCGAGCTCAGUAGACTCGCGGGAACGCGAGTCTGCTGAGCTCGCGACACTCTTTCCCTTTTTTTTTT	50179.7
UDG_UG_f1TG_f2ATC	17414	53581	52699	0	CGCGAGCTCTGUATCCTCGCGGGAACGCGAGGATGCAGAGCTCGCGACACTCTTTCCCTTTTTTTTTT	67086.8
UDG_UG_f1GT_f2TCA	8042	24840	24840	0	CGCGAGCTCGTUTCACTCGCGGGAACGCGAGTGAGACGAGCTCGCGACACTCTTTCCCTTTTTTTTTT	33221.2
UDG_UG_f1TC_f2ATG	9750	30233	30233	0	CGCGAGCTCTCUATGCTCGCGGGAACGCGAGCATGGAGAGCTCGCGACACTCTTTCCCTTTTTTTTTT	41305.2
UDG_UG_f1TG_f2CTC	9099	28254	28254	0	CGCGAGCTCTGUCTCCTCGCGGGAACGCGAGGAGGCAGAGCTCGCGACACTCTTTCCCTTTTTTTTTT	39736.9
UDG_UG_f1GG_f2CGC	8653	26367	26367	0	CGCGAGCTCGGUCGCCTCGCGGGAACGCGAGGCGGCCGAGCTCGCGACACTCTTTCCCTTTTTTTTTT	38391
UDG_UG_f1TT_f2ATG	15349	47372	47372	0	CGCGAGCTCTTUATGCTCGCGGGAACGCGAGCATGAAGAGCTCGCGACACTCTTTCCCTTTTTTTTTT	72310.5
UDG_UG_f1CC_f2TAA	5489	16534	16534	0	CGCGAGCTCCCUTAACTCGCGGGAACGCGAGTTAGGGGAGCTCGCGACACTCTTTCCCTTTTTTTTTT	26645
UDG_UG_f1AA_f2CTC	7349	22815	22815	0	CGCGAGCTCAAUCTCCTCGCGGGAACGCGAGGAGGTTGAGCTCGCGACACTCTTTCCCTTTTTTTTTT	39671.8
UDG_UG_f1GA_f2ACG	8293	26066	26066	0	CGCGAGCTCGAUACGCTCGCGGGAACGCGAGCGTGTCGAGCTCGCGACACTCTTTCCCTTTTTTTTTT	45324.8
UDG_UG_f1TC_f2ACC	5117	15988	15988	0	CGCGAGCTCTCUACCCTCGCGGGAACGCGAGGGTGGAGAGCTCGCGACACTCTTTCCCTTTTTTTTTT	27800.7
UDG_UG_f1TG_f2AGC	8260	25418	25418	0	CGCGAGCTCTGUAGCCTCGCGGGAACGCGAGGCTGCAGAGCTCGCGACACTCTTTCCCTTTTTTTTTT	44198.1
UDG_UG_f1AA_f2GTC	7007	21540	21540	0	CGCGAGCTCAAUGTCCTCGCGGGAACGCGAGGACGTTGAGCTCGCGACACTCTTTCCCTTTTTTTTTT	37454.8
UDG_UG_f1AT_f2TTA	5207	15586	15586	0	CGCGAGCTCATUTTACTCGCGGGAACGCGAGTAAGATGAGCTCGCGACACTCTTTCCCTTTTTTTTTT	27101.7
UDG_UG_f1AA_f2AAC	7331	22187	22187	0	CGCGAGCTCAAUAACCTCGCGGGAACGCGAGGTTGTTGAGCTCGCGACACTCTTTCCCTTTTTTTTTT	38579.8
UDG_UG_f1AT_f2ATA	9001	27648	27648	0	CGCGAGCTCATUATACTCGCGGGAACGCGAGTATGATGAGCTCGCGACACTCTTTCCCTTTTTTTTTT	48075.7
UDG_UG_f1GC_f2GAC	12095	38176	38176	0	CGCGAGCTCGCUGACCTCGCGGGAACGCGAGGTCGGCGAGCTCGCGACACTCTTTCCCTTTTTTTTTT	31342.7
UDG_UG_f1TC_f2CTA	13446	40958	40958	0	CGCGAGCTCTCUCTACTCGCGGGAACGCGAGTAGGGAGAGCTCGCGACACTCTTTCCCTTTTTTTTTT	33626.7
UDG_UG_f1AG_f2AGT	16791	52906	50812	0	CGCGAGCTCAGUAGTCTCGCGGGAACGCGAGACTGCTGAGCTCGCGACACTCTTTCCCTTTTTTTTTT	41716.9
UDG_UG_f1GA_f2AGT	18347	56918	55525	0	CGCGAGCTCGAUAGTCTCGCGGGAACGCGAGACTGTCGAGCTCGCGACACTCTTTCCCTTTTTTTTTT	45586.3
UDG_UG_f1AT_f2ATT	31384	65535	95011	0	CGCGAGCTCATUATTCTCGCGGGAACGCGAGAATGATGAGCTCGCGACACTCTTTCCCTTTTTTTTTT	78004.6
UDG_UG_f1CC_f2CAG	11666	37305	37305	0	CGCGAGCTCCCUCAGCTCGCGGGAACGCGAGCTGGGGGAGCTCGCGACACTCTTTCCCTTTTTTTTTT	30627.6
UDG_UG_f1GT_f2GGA	15257	46482	46482	0	CGCGAGCTCGTUGGACTCGCGGGAACGCGAGTCCGACGAGCTCGCGACACTCTTTCCCTTTTTTTTTT	38162
UDG_UG_f1GG_f2CAG	14007	43781	43781	0	CGCGAGCTCGGUCAGCTCGCGGGAACGCGAGCTGGCCGAGCTCGCGACACTCTTTCCCTTTTTTTTTT	35944.4
UDG_UG_f1TT_f2GGG	14345	43402	43402	0	CGCGAGCTCTTUGGGCTCGCGGGAACGCGAGCCCGAAGAGCTCGCGACACTCTTTCCCTTTTTTTTTT	35733.6
UDG_UG_f1GT_f2CTA	18755	59266	56761	0	CGCGAGCTCGTUCTACTCGCGGGAACGCGAGTAGGACGAGCTCGCGACACTCTTTCCCTTTTTTTTTT	46850.6
UDG_UG_f1TG_f2CTG	15092	48897	48897	0	CGCGAGCTCTGUCTGCTCGCGGGAACGCGAGCAGGCAGAGCTCGCGACACTCTTTCCCTTTTTTTTTT	40924.3
UDG_UG_f1CG_f2ATC	31290	65535	94727	0	CGCGAGCTCCGUATCCTCGCGGGAACGCGAGGATGCGGAGCTCGCGACACTCTTTCCCTTTTTTTTTT	78656.2
UDG_UG_f1TC_f2CAC	10836	35563	35563	0	CGCGAGCTCTCUCACCTCGCGGGAACGCGAGGTGGGAGAGCTCGCGACACTCTTTCCCTTTTTTTTTT	29529.6
UDG_UG_f1GG_f2AGG	19061	61168	57687	0	CGCGAGCTCGGUAGGCTCGCGGGAACGCGAGCCTGCCGAGCTCGCGACACTCTTTCCCTTTTTTTTTT	47370.8
UDG_UG_f1GC_f2GTA	13268	42781	42781	0	CGCGAGCTCGCUGTACTCGCGGGAACGCGAGTACGGCGAGCTCGCGACACTCTTTCCCTTTTTTTTTT	35130.4
UDG_UG_f1TT_f2ATA	34910	65535	105691	0	CGCGAGCTCTTUATACTCGCGGGAACGCGAGTATGAAGAGCTCGCGACACTCTTTCCCTTTTTTTTTT	86772.9
UDG_UG_f1TA_f2AGC	13032	41379	41379	0	CGCGAGCTCTAUAGCCTCGCGGGAACGCGAGGCTGTAGAGCTCGCGACACTCTTTCCCTTTTTTTTTT	33939.4
UDG_UG_f1TA_f2TAA	12885	42596	42596	0	CGCGAGCTCTAUTAACTCGCGGGAACGCGAGTTAGTAGAGCTCGCGACACTCTTTCCCTTTTTTTTTT	34971.6
UDG_UG_f1CT_f2GCA	12694	41937	41937	0	CGCGAGCTCCTUGCACTCGCGGGAACGCGAGTGCGAGGAGCTCGCGACACTCTTTCCCTTTTTTTTTT	34631
UDG_UG_f1CC_f2CCA	10110	32619	32619	0	CGCGAGCTCCCUCCACTCGCGGGAACGCGAGTGGGGGGAGCTCGCGACACTCTTTCCCTTTTTTTTTT	26936.3
UDG_UG_f1CG_f2CTA	15174	48555	48555	0	CGCGAGCTCCGUCTACTCGCGGGAACGCGAGTAGGCGGAGCTCGCGACACTCTTTCCCTTTTTTTTTT	40491.2
UDG_UG_f1AT_f2GTT	18010	56964	54504	0	CGCGAGCTCATUGTTCTCGCGGGAACGCGAGAACGATGAGCTCGCGACACTCTTTCCCTTTTTTTTTT	45783.1
UDG_UG_f1AT_f2AAT	19611	61983	59353	0	CGCGAGCTCATUAATCTCGCGGGAACGCGAGATTGATGAGCTCGCGACACTCTTTCCCTTTTTTTTTT	49530.4
UDG_UG_f1AG_f2AGA	28014	65535	84804	0	CGCGAGCTCAGUAGACTCGCGGGAACGCGAGTCTGCTGAGCTCGCGACACTCTTTCCCTTTTTTTTTT	70955.9
UDG_UG_f1TT_f2GTC	16332	52595	49422	0	CGCGAGCTCTTUGTCCTCGCGGGAACGCGAGGACGAAGAGCTCGCGACACTCTTTCCCTTTTTTTTTT	41085.1
UDG_UG_f1TG_f2CAC	13364	42537	42537	0	CGCGAGCTCTGUCACCTCGCGGGAACGCGAGGTGGCAGAGCTCGCGACACTCTTTCCCTTTTTTTTTT	35590.9
UDG_UG_f1CA_f2GTT	16343	53882	49455	0	CGCGAGCTCCAUGTTCTCGCGGGAACGCGAGAACGTGGAGCTCGCGACACTCTTTCCCTTTTTTTTTT	41726
UDG_MM_GA	10460	33413	33413	0	CGCGAGCTCACGCTTACCGCGGGAACGCGGTAAGAGTGAGCTCGCGACACTCTTTCCCTTTTTTTTTT	28762
UDG_UG_f1TA_f2CTA	12353	38434	38434	0	CGCGAGCTCTAUCTACTCGCGGGAACGCGAGTAGGTAGAGCTCGCGACACTCTTTCCCTTTTTTTTTT	33193.3
UDG_UG_f1GG_f2GGG	14483	44401	44401	0	CGCGAGCTCGGUGGGCTCGCGGGAACGCGAGCCCGCCGAGCTCGCGACACTCTTTCCCTTTTTTTTTT	38778.5
UDG_UG_f1CT_f2ACT	14761	48297	48297	0	CGCGAGCTCCTUACTCTCGCGGGAACGCGAGAGTGAGGAGCTCGCGACACTCTTTCCCTTTTTTTTTT	42297.4
UDG_UG_f1CT_f2GCG	12763	40598	40598	0	CGCGAGCTCCTUGCGCTCGCGGGAACGCGAGCGCGAGGAGCTCGCGACACTCTTTCCCTTTTTTTTTT	36001.2
UDG_UG_f1TA_f2ACA	15914	50799	48156	0	CGCGAGCTCTAUACACTCGCGGGAACGCGAGTGTGTAGAGCTCGCGACACTCTTTCCCTTTTTTTTTT	43244.4
UDG_UG_f1GG_f2AGT	19603	62315	59329	0	CGCGAGCTCGGUAGTCTCGCGGGAACGCGAGACTGCCGAGCTCGCGACACTCTTTCCCTTTTTTTTTT	52983.2
UDG_UG_f1TA_f2CAA	12276	41268	41268	0	CGCGAGCTCTAUCAACTCGCGGGAACGCGAGTTGGTAGAGCTCGCGACACTCTTTCCCTTTTTTTTTT	36341.2
UDG_UG_f1CA_f2GAG	11268	37186	37186	0	CGCGAGCTCCAUGAGCTCGCGGGAACGCGAGCTCGTGGAGCTCGCGACACTCTTTCCCTTTTTTTTTT	32320.6
UDG_UG_f1GA_f2CGA	13280	42436	42436	0	CGCGAGCTCGAUCGACTCGCGGGAACGCGAGTCGGTCGAGCTCGCGACACTCTTTCCCTTTTTTTTTT	37129.5
UDG_UG_f1CA_f2GAG	12553	38422	38422	0	CGCGAGCTCCAUGAGCTCGCGGGAACGCGAGCTCGTGGAGCTCGCGACACTCTTTCCCTTTTTTTTTT	33800.5
UDG_UG_f1AC_f2CCT	11736	37806	37806	0	CGCGAGCTCACUCCTCTCGCGGGAACGCGAGAGGGGTGAGCTCGCGACACTCTTTCCCTTTTTTTTTT	33676.5
UDG_UG_f1TG_f2CTA	17544	54000	53093	0	CGCGAGCTCTGUCTACTCGCGGGAACGCGAGTAGGCAGAGCTCGCGACACTCTTTCCCTTTTTTTTTT	47660.5
UDG_UG_f1GT_f2TCA	12337	38851	38851	0	CGCGAGCTCGTUTCACTCGCGGGAACGCGAGTGAGACGAGCTCGCGACACTCTTTCCCTTTTTTTTTT	35392.3
UDG_UG_f1GT_f2CAG	15855	49863	49863	0	CGCGAGCTCGTUCAGCTCGCGGGAACGCGAGCTGGACGAGCTCGCGACACTCTTTCCCTTTTTTTTTT	45205.6
UDG_UG_f1CT_f2TCC	12252	38456	38456	0	CGCGAGCTCCTUTCCCTCGCGGGAACGCGAGGGAGAGGAGCTCGCGACACTCTTTCCCTTTTTTTTTT	35053.1
UDG_UG_f1AA_f2CGT	12704	41436	41436	0	CGCGAGCTCAAUCGTCTCGCGGGAACGCGAGACGGTTGAGCTCGCGACACTCTTTCCCTTTTTTTTTT	38240.4
UDG_UG_f1TG_f2ATG	25299	65535	76581	0	CGCGAGCTCTGUATGCTCGCGGGAACGCGAGCATGCAGAGCTCGCGACACTCTTTCCCTTTTTTTTTT	72497.6
UDG_random_6b_3	9545	31369	31369	0	CGCGAGCTCGTATTCCTCGCGGGAACGCGAGGAATACGAGCTCGCGACACTCTTTCCCTTTTTTTTTT	29904.4
UDG_UG_f1CT_f2GAA	10558	33843	33843	0	CGCGAGCTCCTUGAACTCGCGGGAACGCGAGTTCGAGGAGCTCGCGACACTCTTTCCCTTTTTTTTTT	32511.5
UDG_UG_f1GT_f2AGC	11425	36467	36467	0	CGCGAGCTCGTUAGCCTCGCGGGAACGCGAGGCTGACGAGCTCGCGACACTCTTTCCCTTTTTTTTTT	35319.9
UDG_UG_f1GT_f2CGA	11122	34098	34098	0	CGCGAGCTCGTUCGACTCGCGGGAACGCGAGTCGGACGAGCTCGCGACACTCTTTCCCTTTTTTTTTT	33905.9
UDG_UG_f1GG_f2GGA	12915	38401	38401	0	CGCGAGCTCGGUGGACTCGCGGGAACGCGAGTCCGCCGAGCTCGCGACACTCTTTCCCTTTTTTTTTT	39015.9
UDG_UG_f1CG_f2GAA	12705	39370	39370	0	CGCGAGCTCCGUGAACTCGCGGGAACGCGAGTTCGCGGAGCTCGCGACACTCTTTCCCTTTTTTTTTT	41594.1
UDG_UG_f1GT_f2TTG	10212	31889	31889	0	CGCGAGCTCGTUTTGCTCGCGGGAACGCGAGCAAGACGAGCTCGCGACACTCTTTCCCTTTTTTTTTT	34675.6
UDG_UG_f1CG_f2GGC	15069	46160	46160	0	CGCGAGCTCCGUGGCCTCGCGGGAACGCGAGGCCGCGGAGCTCGCGACACTCTTTCCCTTTTTTTTTT	51049.9
UDG_MM_AG	8569	26360	26360	0	CGCGAGCTCACACTTACCGCGGGAACGCGGTAAGGGTGAGCTCGCGACACTCTTTCCCTTTTTTTTTT	29370.1
UDG_UG_f1AA_f2CTA	12594	37955	37955	0	CGCGAGCTCAAUCTACTCGCGGGAACGCGAGTAGGTTGAGCTCGCGACACTCTTTCCCTTTTTTTTTT	43126
UDG_UG_f1AA_f2GCG	11877	36076	36076	0	CGCGAGCTCAAUGCGCTCGCGGGAACGCGAGCGCGTTGAGCTCGCGACACTCTTTCCCTTTTTTTTTT	41640.5
UDG_UG_f1GA_f2TAC	8742	27192	27192	0	CGCGAGCTCGAUTACCTCGCGGGAACGCGAGGTAGTCGAGCTCGCGACACTCTTTCCCTTTTTTTTTT	31965.2
UDG_UG_f1AG_f2GTA	10828	34294	34294	0	CGCGAGCTCAGUGTACTCGCGGGAACGCGAGTACGCTGAGCTCGCGACACTCTTTCCCTTTTTTTTTT	41447
UDG_UG_f1AT_f2AAC	14609	44796	44796	0	CGCGAGCTCATUAACCTCGCGGGAACGCGAGGTTGATGAGCTCGCGACACTCTTTCCCTTTTTTTTTT	55047.4
UDG_UG_f1AC_f2CTA	9358	29203	29203	0	CGCGAGCTCACUCTACTCGCGGGAACGCGAGTAGGGTGAGCTCGCGACACTCTTTCCCTTTTTTTTTT	36594.1
UDG_UG_f1AT_f2GGT	9558	29419	29419	0	CGCGAGCTCATUGGTCTCGCGGGAACGCGAGACCGATGAGCTCGCGACACTCTTTCCCTTTTTTTTTT	37652.2
UDG_UG_f1TC_f2AGT	9556	29765	29765	0	CGCGAGCTCTCUAGTCTCGCGGGAACGCGAGACTGGAGAGCTCGCGACACTCTTTCCCTTTTTTTTTT	39819.4
UDG_UG_f1GT_f2CTC	10023	30312	30312	0	CGCGAGCTCGTUCTCCTCGCGGGAACGCGAGGAGGACGAGCTCGCGACACTCTTTCCCTTTTTTTTTT	41413.1
UDG_UG_f1GT_f2CGA	10069	31649	31649	0	CGCGAGCTCGTUCGACTCGCGGGAACGCGAGTCGGACGAGCTCGCGACACTCTTTCCCTTTTTTTTTT	44504.9
UDG_UG_f1CG_f2AAG	14119	42720	42720	0	CGCGAGCTCCGUAAGCTCGCGGGAACGCGAGCTTGCGGAGCTCGCGACACTCTTTCCCTTTTTTTTTT	61564.4
UDG_UG_f1TA_f2TGA	6363	19231	19231	0	CGCGAGCTCTAUTGACTCGCGGGAACGCGAGTCAGTAGAGCTCGCGACACTCTTTCCCTTTTTTTTTT	28935.3
UDG_UG_f1GA_f2GAT	7934	24497	24497	0	CGCGAGCTCGAUGATCTCGCGGGAACGCGAGATCGTCGAGCTCGCGACACTCTTTCCCTTTTTTTTTT	39416
UDG_UG_f1AA_f2AGT	10324	32455	32455	0	CGCGAGCTCAAUAGTCTCGCGGGAACGCGAGACTGTTGAGCTCGCGACACTCTTTCCCTTTTTTTTTT	55975.8
UDG_UG_f1TG_f2GGT	6797	20935	20935	0	CGCGAGCTCTGUGGTCTCGCGGGAACGCGAGACCGCAGAGCTCGCGACACTCTTTCCCTTTTTTTTTT	36107
UDG_UG_f1AT_f2AAA	9676	29959	29959	0	CGCGAGCTCATUAAACTCGCGGGAACGCGAGTTTGATGAGCTCGCGACACTCTTTCCCTTTTTTTTTT	51670.9
UDG_UG_f1TA_f2CCA	4404	13406	13406	0	CGCGAGCTCTAUCCACTCGCGGGAACGCGAGTGGGTAGAGCTCGCGACACTCTTTCCCTTTTTTTTTT	23121.6
UDG_UG_f1AC_f2CTT	3546	10462	10462	0	CGCGAGCTCACUCTTCTCGCGGGAACGCGAGAAGGGTGAGCTCGCGACACTCTTTCCCTTTTTTTTTT	18044
UDG_UG_f1GG_f2GAA	4910	15347	15347	0	CGCGAGCTCGGUGAACTCGCGGGAACGCGAGTTCGCCGAGCTCGCGACACTCTTTCCCTTTTTTTTTT	26469.3
UDG_UG_f1TC_f2ATG	4548	13285	13285	0	CGCGAGCTCTCUATGCTCGCGGGAACGCGAGCATGGAGAGCTCGCGACACTCTTTCCCTTTTTTTTTT	22912.9
UDG_UG_f1CG_f2CGG	3019	8600	8600	0	CGCGAGCTCCGUCGGCTCGCGGGAACGCGAGCCGGCGGAGCTCGCGACACTCTTTCCCTTTTTTTTTT	14832.6
UDG_UG_f1CA_f2GAC	14396	44193	44193	0	CGCGAGCTCCAUGACCTCGCGGGAACGCGAGGTCGTGGAGCTCGCGACACTCTTTCCCTTTTTTTTTT	36247.5
UDG_UG_f1CC_f2TGA	10145	31653	31653	0	CGCGAGCTCCCUTGACTCGCGGGAACGCGAGTCAGGGGAGCTCGCGACACTCTTTCCCTTTTTTTTTT	25962
UDG_UG_f1CA_f2GTG	16623	50787	50303	0	CGCGAGCTCCAUGTGCTCGCGGGAACGCGAGCACGTGGAGCTCGCGACACTCTTTCCCTTTTTTTTTT	41258.9
UDG_UG_f1CC_f2AAC	15560	46733	46733	0	CGCGAGCTCCCUAACCTCGCGGGAACGCGAGGTTGGGGAGCTCGCGACACTCTTTCCCTTTTTTTTTT	38330.8
UDG_UG_f1GC_f2ACC	13426	41499	41499	0	CGCGAGCTCGCUACCCTCGCGGGAACGCGAGGGTGGCGAGCTCGCGACACTCTTTCCCTTTTTTTTTT	34037.8
UDG_UG_f1TG_f2CAG	14307	46162	46162	0	CGCGAGCTCTGUCAGCTCGCGGGAACGCGAGCTGGCAGAGCTCGCGACACTCTTTCCCTTTTTTTTTT	37862.4
UDG_UG_f1GC_f2CTG	14562	46044	46044	0	CGCGAGCTCGCUCTGCTCGCGGGAACGCGAGCAGGGCGAGCTCGCGACACTCTTTCCCTTTTTTTTTT	37765.7
UDG_UG_f1TG_f2CTT	16588	51348	50197	0	CGCGAGCTCTGUCTTCTCGCGGGAACGCGAGAAGGCAGAGCTCGCGACACTCTTTCCCTTTTTTTTTT	41172
UDG_UG_f1CT_f2AAC	19324	58711	58484	0	CGCGAGCTCCTUAACCTCGCGGGAACGCGAGGTTGAGGAGCTCGCGACACTCTTTCCCTTTTTTTTTT	48272.8
UDG_UG_f1AT_f2GGA	16249	50261	49170	0	CGCGAGCTCATUGGACTCGCGGGAACGCGAGTCCGATGAGCTCGCGACACTCTTTCCCTTTTTTTTTT	40801.7
UDG_UG_f1TC_f2CCC	14383	45853	45853	0	CGCGAGCTCTCUCCCCTCGCGGGAACGCGAGGGGGGAGAGCTCGCGACACTCTTTCCCTTTTTTTTTT	38376.6
UDG_UG_f1GC_f2TCC	11160	35494	35494	0	CGCGAGCTCGCUTCCCTCGCGGGAACGCGAGGGAGGCGAGCTCGCGACACTCTTTCCCTTTTTTTTTT	29472.3
UDG_UG_f1TG_f2CTC	13999	45009	45009	0	CGCGAGCTCTGUCTCCTCGCGGGAACGCGAGGAGGCAGAGCTCGCGACACTCTTTCCCTTTTTTTTTT	37348.8
UDG_UG_random_2U	18699	59273	56591	0	CGCGUCTACUCTTTATGCGCGGGAACGCGCATAAAGGGTAGGCGCGACACTCTTTCCCTTTTTTTTTT	46416.4
UDG_UG_f1TG_f2TTC	13561	44388	44388	0	CGCGAGCTCTGUTTCCTCGCGGGAACGCGAGGAAGCAGAGCTCGCGACACTCTTTCCCTTTTTTTTTT	36318.4
UDG_UG_f1CC_f2ACT	12685	40637	40637	0	CGCGAGCTCCCUACTCTCGCGGGAACGCGAGAGTGGGGAGCTCGCGACACTCTTTCCCTTTTTTTTTT	33107.9
UDG_UG_f1CA_f2GGG	14397	43999	43999	0	CGCGAGCTCCAUGGGCTCGCGGGAACGCGAGCCCGTGGAGCTCGCGACACTCTTTCCCTTTTTTTTTT	35846.2
UDG_UG_f1GA_f2ACC	16216	53123	49070	0	CGCGAGCTCGAUACCCTCGCGGGAACGCGAGGGTGTCGAGCTCGCGACACTCTTTCCCTTTTTTTTTT	39977.5
UDG_UG_f1GT_f2CTT	21028	64223	63645	0	CGCGAGCTCGTUCTTCTCGCGGGAACGCGAGAAGGACGAGCTCGCGACACTCTTTCCCTTTTTTTTTT	52028.7
UDG_UG_f1TG_f2TCT	13235	43712	43712	0	CGCGAGCTCTGUTCTCTCGCGGGAACGCGAGAGAGCAGAGCTCGCGACACTCTTTCCCTTTTTTTTTT	35733.8
UDG_UG_f1TT_f2CAG	12206	39591	39591	0	CGCGAGCTCTTUCAGCTCGCGGGAACGCGAGCTGGAAGAGCTCGCGACACTCTTTCCCTTTTTTTTTT	32393.5
UDG_UG_f1CT_f2GTA	15400	49925	49925	0	CGCGAGCTCCTUGTACTCGCGGGAACGCGAGTACGAGGAGCTCGCGACACTCTTTCCCTTTTTTTTTT	41460.6
UDG_UG_f1CT_f2AAG	16132	53622	48816	0	CGCGAGCTCCTUAAGCTCGCGGGAACGCGAGCTTGAGGAGCTCGCGACACTCTTTCCCTTTTTTTTTT	40343.9
UDG_UG_f1CC_f2CTC	14718	44518	44518	0	CGCGAGCTCCCUCTCCTCGCGGGAACGCGAGGAGGGGGAGCTCGCGACACTCTTTCCCTTTTTTTTTT	36762.4
UDG_UG_f1GA_f2GAG	13584	44358	44358	0	CGCGAGCTCGAUGAGCTCGCGGGAACGCGAGCTCGTCGAGCTCGCGACACTCTTTCCCTTTTTTTTTT	36355.5
UDG_UG_f1AG_f2AAC	26915	65535	81476	0	CGCGAGCTCAGUAACCTCGCGGGAACGCGAGGTTGCTGAGCTCGCGACACTCTTTCCCTTTTTTTTTT	67944.8
UDG_UG_f1GC_f2CAT	11864	37475	37475	0	CGCGAGCTCGCUCATCTCGCGGGAACGCGAGATGGGCGAGCTCGCGACACTCTTTCCCTTTTTTTTTT	31385.9
UDG_UG_f1AC_f2GTA	12502	40743	40743	0	CGCGAGCTCACUGTACTCGCGGGAACGCGAGTACGGTGAGCTCGCGACACTCTTTCCCTTTTTTTTTT	34728.9
UDG_UG_f1GA_f2GCG	14156	44108	44108	0	CGCGAGCTCGAUGCGCTCGCGGGAACGCGAGCGCGTCGAGCTCGCGACACTCTTTCCCTTTTTTTTTT	37968.3
UDG_UG_f1GT_f2CAC	12740	41352	41352	0	CGCGAGCTCGTUCACCTCGCGGGAACGCGAGGTGGACGAGCTCGCGACACTCTTTCCCTTTTTTTTTT	35821.7
UDG_UG_f1AT_f2CAG	15932	48254	48254	0	CGCGAGCTCATUCAGCTCGCGGGAACGCGAGCTGGATGAGCTCGCGACACTCTTTCCCTTTTTTTTTT	41965
UDG_UG_f1CT_f2CTT	15053	49262	49262	0	CGCGAGCTCCTUCTTCTCGCGGGAACGCGAGAAGGAGGAGCTCGCGACACTCTTTCCCTTTTTTTTTT	43126.3
UDG_UG_f1AA_f2TCC	13775	42153	42153	0	CGCGAGCTCAAUTCCCTCGCGGGAACGCGAGGGAGTTGAGCTCGCGACACTCTTTCCCTTTTTTTTTT	37452.6
UDG_UG_f1CG_f2ATG	30219	65535	91483	0	CGCGAGCTCCGUATGCTCGCGGGAACGCGAGCATGCGGAGCTCGCGACACTCTTTCCCTTTTTTTTTT	80551.7
UDG_UG_f1TT_f2CCG	13167	43016	43016	0	CGCGAGCTCTTUCCGCTCGCGGGAACGCGAGCGGGAAGAGCTCGCGACACTCTTTCCCTTTTTTTTTT	37842
UDG_UG_f1TT_f2TCA	12130	39934	39934	0	CGCGAGCTCTTUTCACTCGCGGGAACGCGAGTGAGAAGAGCTCGCGACACTCTTTCCCTTTTTTTTTT	34709
UDG_UG_f1TG_f2ATC	29562	65535	89493	0	CGCGAGCTCTGUATCCTCGCGGGAACGCGAGGATGCAGAGCTCGCGACACTCTTTCCCTTTTTTTTTT	78302.2
UDG_UG_f1GT_f2ATA	28480	65535	86216	0	CGCGAGCTCGTUATACTCGCGGGAACGCGAGTATGACGAGCTCGCGACACTCTTTCCCTTTTTTTTTT	75477.6
UDG_UG_f1GG_f2CGG	14289	41283	41283	0	CGCGAGCTCGGUCGGCTCGCGGGAACGCGAGCCGGCCGAGCTCGCGACACTCTTTCCCTTTTTTTTTT	36705.9
UDG_UG_f1CC_f2TGT	9626	29969	29969	0	CGCGAGCTCCCUTGTCTCGCGGGAACGCGAGACAGGGGAGCTCGCGACACTCTTTCCCTTTTTTTTTT	26770.6
UDG_UG_f1GC_f2TGT	15591	48553	48553	0	CGCGAGCTCGCUTGTCTCGCGGGAACGCGAGACAGGCGAGCTCGCGACACTCTTTCCCTTTTTTTTTT	44018
UDG_UG_f1CT_f2TGA	18840	59740	57018	0	CGCGAGCTCCTUTGACTCGCGGGAACGCGAGTCAGAGGAGCTCGCGACACTCTTTCCCTTTTTTTTTT	51942
UDG_UG_f1CG_f2CAC	14941	45933	45933	0	CGCGAGCTCCGUCACCTCGCGGGAACGCGAGGTGGCGGAGCTCGCGACACTCTTTCCCTTTTTTTTTT	41868.5
UDG_UG_f1CA_f2GCT	12745	41352	41352	0	CGCGAGCTCCAUGCTCTCGCGGGAACGCGAGAGCGTGGAGCTCGCGACACTCTTTCCCTTTTTTTTTT	38162.9
UDG_UG_f1CT_f2TAC	11414	37190	37190	0	CGCGAGCTCCTUTACCTCGCGGGAACGCGAGGTAGAGGAGCTCGCGACACTCTTTCCCTTTTTTTTTT	35366.5
UDG_UG_f1AA_f2AAG	18419	58409	55743	0	CGCGAGCTCAAUAAGCTCGCGGGAACGCGAGCTTGTTGAGCTCGCGACACTCTTTCCCTTTTTTTTTT	53352.6
UDG_UG_f1TG_f2TTG	12058	38734	38734	0	CGCGAGCTCTGUTTGCTCGCGGGAACGCGAGCAAGCAGAGCTCGCGACACTCTTTCCCTTTTTTTTTT	37515.6
UDG_UG_f1CG_f2ACG	17536	54768	53068	0	CGCGAGCTCCGUACGCTCGCGGGAACGCGAGCGTGCGGAGCTCGCGACACTCTTTCCCTTTTTTTTTT	51922.6
UDG_UG_f1TT_f2AAA	16527	49551	49551	0	CGCGAGCTCTTUAAACTCGCGGGAACGCGAGTTTGAAGAGCTCGCGACACTCTTTCCCTTTTTTTTTT	49498.4
UDG_UG_f1GC_f2TTG	9628	31015	31015	0	CGCGAGCTCGCUTTGCTCGCGGGAACGCGAGCAAGGCGAGCTCGCGACACTCTTTCCCTTTTTTTTTT	31757.4
UDG_UG_f1CG_f2GGC	12311	37295	37295	0	CGCGAGCTCCGUGGCCTCGCGGGAACGCGAGGCCGCGGAGCTCGCGACACTCTTTCCCTTTTTTTTTT	39863.3
UDG_UG_f1GC_f2ACG	10021	32262	32262	0	CGCGAGCTCGCUACGCTCGCGGGAACGCGAGCGTGGCGAGCTCGCGACACTCTTTCCCTTTTTTTTTT	35195.6
UDG_UG_f1GA_f2GTC	13682	42015	42015	0	CGCGAGCTCGAUGTCCTCGCGGGAACGCGAGGACGTCGAGCTCGCGACACTCTTTCCCTTTTTTTTTT	46503.2
UDG_UG_f1AA_f2CTC	12991	40165	40165	0	CGCGAGCTCAAUCTCCTCGCGGGAACGCGAGGAGGTTGAGCTCGCGACACTCTTTCCCTTTTTTTTTT	45196.1
UDG_UG_f1CA_f2GGT	10557	32458	32458	0	CGCGAGCTCCAUGGTCTCGCGGGAACGCGAGACCGTGGAGCTCGCGACACTCTTTCCCTTTTTTTTTT	37163.1
UDG_UG_f1TG_f2GAT	12002	36474	36474	0	CGCGAGCTCTGUGATCTCGCGGGAACGCGAGATCGCAGAGCTCGCGACACTCTTTCCCTTTTTTTTTT	42492
UDG_UG_f1TT_f2CAG	10606	32633	32633	0	CGCGAGCTCTTUCAGCTCGCGGGAACGCGAGCTGGAAGAGCTCGCGACACTCTTTCCCTTTTTTTTTT	38736.4
UDG_UG_f1CT_f2TGT	8950	27443	27443	0	CGCGAGCTCCTUTGTCTCGCGGGAACGCGAGACAGAGGAGCTCGCGACACTCTTTCCCTTTTTTTTTT	33373.3
UDG_UG_f1GC_f2ACG	10218	31603	31603	0	CGCGAGCTCGCUACGCTCGCGGGAACGCGAGCGTGGCGAGCTCGCGACACTCTTTCCCTTTTTTTTTT	39079.6
UDG_UG_f1GG_f2CGT	10124	30728	30728	0	CGCGAGCTCGGUCGTCTCGCGGGAACGCGAGACGGCCGAGCTCGCGACACTCTTTCCCTTTTTTTTTT	38589.7
UDG_UG_f1GC_f2ACG	9638	29027	29027	0	CGCGAGCTCGCUACGCTCGCGGGAACGCGAGCGTGGCGAGCTCGCGACACTCTTTCCCTTTTTTTTTT	37710.4
UDG_UG_f1GC_f2CCG	8525	26143	26143	0	CGCGAGCTCGCUCCGCTCGCGGGAACGCGAGCGGGGCGAGCTCGCGACACTCTTTCCCTTTTTTTTTT	35361
UDG_UG_f1CG_f2ATC	15166	46226	46226	0	CGCGAGCTCCGUATCCTCGCGGGAACGCGAGGATGCGGAGCTCGCGACACTCTTTCCCTTTTTTTTTT	63743.7
UDG_UG_f1TA_f2GGT	8583	26472	26472	0	CGCGAGCTCTAUGGTCTCGCGGGAACGCGAGACCGTAGAGCTCGCGACACTCTTTCCCTTTTTTTTTT	37579.2
UDG_UG_f1AC_f2TGT	7343	23796	23796	0	CGCGAGCTCACUTGTCTCGCGGGAACGCGAGACAGGTGAGCTCGCGACACTCTTTCCCTTTTTTTTTT	34693.8
UDG_UG_f1CG_f2CGG	8280	24843	24843	0	CGCGAGCTCCGUCGGCTCGCGGGAACGCGAGCCGGCGGAGCTCGCGACACTCTTTCCCTTTTTTTTTT	37675.2
UDG_UG_f1TT_f2GAA	7681	24215	24215	0	CGCGAGCTCTTUGAACTCGCGGGAACGCGAGTTCGAAGAGCTCGCGACACTCTTTCCCTTTTTTTTTT	39087.5
UDG_UG_f1TC_f2AAA	8947	28037	28037	0	CGCGAGCTCTCUAAACTCGCGGGAACGCGAGTTTGGAGAGCTCGCGACACTCTTTCCCTTTTTTTTTT	48232.9
UDG_UG_f1TA_f2GTC	6407	19528	19528	0	CGCGAGCTCTAUGTCCTCGCGGGAACGCGAGGACGTAGAGCTCGCGACACTCTTTCCCTTTTTTTTTT	33594.6
UDG_UG_f1TG_f2ACG	9710	29825	29825	0	CGCGAGCTCTGUACGCTCGCGGGAACGCGAGCGTGCAGAGCTCGCGACACTCTTTCCCTTTTTTTTTT	51308.8
UDG_UG_f1TT_f2CTC	6140	18657	18657	0	CGCGAGCTCTTUCTCCTCGCGGGAACGCGAGGAGGAAGAGCTCGCGACACTCTTTCCCTTTTTTTTTT	32096.2
UDG_UG_f1CG_f2CTC	4387	13145	13145	0	CGCGAGCTCCGUCTCCTCGCGGGAACGCGAGGAGGCGGAGCTCGCGACACTCTTTCCCTTTTTTTTTT	22613.7
UDG_UG_f1TC_f2TAG	2778	8526	8526	0	CGCGAGCTCTCUTAGCTCGCGGGAACGCGAGCTAGGAGAGCTCGCGACACTCTTTCCCTTTTTTTTTT	14667.5
UDG_UG_f1CG_f2CTA	5892	17502	17502	0	CGCGAGCTCCGUCTACTCGCGGGAACGCGAGTAGGCGGAGCTCGCGACACTCTTTCCCTTTTTTTTTT	30109.2
UDG_UG_f1CT_f2TCT	2307	6723	6723	0	CGCGAGCTCCTUTCTCTCGCGGGAACGCGAGAGAGAGGAGCTCGCGACACTCTTTCCCTTTTTTTTTT	11565.8
UDG_UG_f1AT_f2CAA	17576	52653	53190	0	CGCGAGCTCATUCAACTCGCGGGAACGCGAGTTGGATGAGCTCGCGACACTCTTTCCCTTTTTTTTTT	43626.9
UDG_UG_f1TT_f2TAG	12568	38492	38492	0	CGCGAGCTCTTUTAGCTCGCGGGAACGCGAGCTAGAAGAGCTCGCGACACTCTTTCCCTTTTTTTTTT	31571.4
UDG_UG_f1CT_f2GCT	11959	36264	36264	0	CGCGAGCTCCTUGCTCTCGCGGGAACGCGAGAGCGAGGAGCTCGCGACACTCTTTCCCTTTTTTTTTT	29744
UDG_UG_f1GC_f2ATC	15378	46406	46406	0	CGCGAGCTCGCUATCCTCGCGGGAACGCGAGGATGGCGAGCTCGCGACACTCTTTCCCTTTTTTTTTT	38062.6
UDG_Uloop	13961	42662	42662	0	CGCGAGCTCGGCTATCTCGCGGUAACGCGAGATAGCCGAGCTCGCGACACTCTTTCCCTTTTTTTTTT	34991.7
UDG_UG_f1GT_f2ATT	32324	65535	97858	0	CGCGAGCTCGTUATTCTCGCGGGAACGCGAGAATGACGAGCTCGCGACACTCTTTCCCTTTTTTTTTT	80263.9
UDG_UG_f1TT_f2GCT	15044	48180	48180	0	CGCGAGCTCTTUGCTCTCGCGGGAACGCGAGAGCGAAGAGCTCGCGACACTCTTTCCCTTTTTTTTTT	39517.6
UDG_UG_f1TA_f2CCA	13369	44332	44332	0	CGCGAGCTCTAUCCACTCGCGGGAACGCGAGTGGGTAGAGCTCGCGACACTCTTTCCCTTTTTTTTTT	36361.5
UDG_UG_f1GG_f2ATT	26330	65535	79704	0	CGCGAGCTCGGUATTCTCGCGGGAACGCGAGAATGCCGAGCTCGCGACACTCTTTCCCTTTTTTTTTT	65787.8
UDG_UG_f1TT_f2GGA	13574	44770	44770	0	CGCGAGCTCTTUGGACTCGCGGGAACGCGAGTCCGAAGAGCTCGCGACACTCTTTCCCTTTTTTTTTT	36953.2
UDG_UG_f1CC_f2CCC	11768	35648	35648	0	CGCGAGCTCCCUCCCCTCGCGGGAACGCGAGGGGGGGGAGCTCGCGACACTCTTTCCCTTTTTTTTTT	29600.2
UDG_UG_f1AG_f2TTC	14353	47977	47977	0	CGCGAGCTCAGUTTCCTCGCGGGAACGCGAGGAAGCTGAGCTCGCGACACTCTTTCCCTTTTTTTTTT	39811.7
UDG_UG_f1AA_f2TCT	12532	41963	41963	0	CGCGAGCTCAAUTCTCTCGCGGGAACGCGAGAGAGTTGAGCTCGCGACACTCTTTCCCTTTTTTTTTT	34843.8
UDG_UG_f1CG_f2TCT	12117	39906	39906	0	CGCGAGCTCCGUTCTCTCGCGGGAACGCGAGAGAGCGGAGCTCGCGACACTCTTTCCCTTTTTTTTTT	32938.5
[truncated: 5,386 more rows]

## Sheet: ARP_NNUNNN_UG_processed_nor
Flanks	ln_FI_normalized
AAUAAA	10.2005
AAUAAC	10.1464
AAUAAG	10.0728
AAUAAT	10.2893
AAUACA	10.1769
AAUACC	10.1742
AAUACG	10.1571
AAUACT	10.2422
AAUAGA	10.1908
AAUAGC	10.2137
AAUAGG	10.1379
AAUAGT	10.1718
AAUATA	10.2634
AAUATC	10.2737
AAUATG	10.2196
AAUATT	10.266
AAUCAA	10.2383
AAUCAC	10.2417
AAUCAG	10.1615
AAUCAT	10.2574
AAUCCA	10.2627
AAUCCC	10.284
AAUCCG	10.2376
AAUCCT	10.1902
AAUCGA	10.2247
AAUCGC	10.2532
AAUCGG	10.1818
AAUCGT	10.2706
AAUCTA	10.247
AAUCTC	10.2842
AAUCTG	10.2111
AAUCTT	10.2806
AAUGAA	10.1784
AAUGAC	10.1871
AAUGAG	10.0952
AAUGAT	10.1273
AAUGCA	10.2412
AAUGCC	10.329
AAUGCG	10.2381
AAUGCT	10.1643
AAUGGA	10.3287
AAUGGC	10.3705
AAUGGG	10.2594
AAUGGT	10.3054
AAUGTA	10.2743
AAUGTC	10.2502
AAUGTG	10.287
AAUGTT	10.3212
AAUTAA	10.1458
AAUTAC	10.1611
AAUTAG	10.0686
AAUTAT	10.1825
AAUTCA	10.1729
AAUTCC	10.195
AAUTCG	10.0876
AAUTCT	10.1578
AAUTGA	10.1041
AAUTGC	10.206
AAUTGG	10.0646
AAUTGT	10.1334
AAUTTA	10.1793
AAUTTC	10.2067
AAUTTG	10.2171
AAUTTT	10.179
ACUAAA	10.0875
ACUAAC	10.1245
ACUAAG	10.0113
ACUAAT	10.104
ACUACA	10.1388
ACUACC	10.0415
ACUACG	10.1179
ACUACT	10.0504
ACUAGA	10.0394
ACUAGC	10.0907
ACUAGG	10.0153
ACUAGT	10.0815
ACUATA	10.1213
ACUATC	10.1349
ACUATG	10.1
ACUATT	10.0389
ACUCAA	10.1505
ACUCAC	10.2308
ACUCAG	10.0091
ACUCAT	10.1414
ACUCCA	10.1899
ACUCCC	10.3212
ACUCCG	10.1741
ACUCCT	10.1306
ACUCGA	10.1487
ACUCGC	10.3188
ACUCGG	10.1169
ACUCGT	10.1456
ACUCTA	10.075
ACUCTC	10.2124
ACUCTG	10.1377
ACUCTT	10.1172
ACUGAA	10.1198
ACUGAC	10.1292
ACUGAG	10.0428
ACUGAT	10.0419
ACUGCA	10.1416
ACUGCC	10.2735
ACUGCG	10.266
ACUGCT	10.1133
ACUGGA	10.1289
ACUGGC	10.2015
ACUGGG	10.096
ACUGGT	10.163
ACUGTA	10.156
ACUGTC	10.2123
ACUGTG	10.1589
ACUGTT	10.2293
ACUTAA	10.0003
ACUTAC	9.975
ACUTAG	9.95243
ACUTAT	9.99218
ACUTCA	10.0107
ACUTCC	9.98934
ACUTCG	9.92382
ACUTCT	10.0621
ACUTGA	9.90152
ACUTGC	9.99284
ACUTGG	9.76823
ACUTGT	9.99727
ACUTTA	10.0485
ACUTTC	10.0369
ACUTTG	9.98701
ACUTTT	10.0459
AGUAAA	10.09
AGUAAC	10.1252
AGUAAG	10.0641
AGUAAT	10.0577
AGUACA	10.081
AGUACC	10.1636
AGUACG	10.0771
AGUACT	10.1292
AGUAGA	10.093
AGUAGC	10.1577
AGUAGG	10.1241
AGUAGT	10.1175
AGUATA	10.0725
AGUATC	10.1301
AGUATG	10.1102
AGUATT	10.0632
AGUCAA	10.2365
AGUCAC	10.2848
AGUCAG	10.1417
AGUCAT	10.1768
AGUCCA	10.3714
AGUCCC	10.4254
AGUCCG	10.3636
AGUCCT	10.3124
AGUCGA	10.2682
AGUCGC	10.4198
AGUCGG	10.2151
AGUCGT	10.251
AGUCTA	10.2134
AGUCTC	10.3862
AGUCTG	10.2433
AGUCTT	10.1981
AGUGAA	10.1632
AGUGAC	10.1607
AGUGAG	9.98344
AGUGAT	10.1273
AGUGCA	10.2129
AGUGCC	10.2613
AGUGCG	10.1833
AGUGCT	10.1932
AGUGGA	10.1982
AGUGGC	10.3337
AGUGGG	10.197
AGUGGT	10.2314
AGUGTA	10.2073
AGUGTC	10.2926
AGUGTG	10.186
AGUGTT	10.2086
AGUTAA	10.0466
AGUTAC	10.0206
AGUTAG	9.99515
AGUTAT	10.0898
AGUTCA	10.0855
AGUTCC	10.0881
AGUTCG	10.0701
AGUTCT	10.0691
AGUTGA	10.004
AGUTGC	10.1762
AGUTGG	9.98675
AGUTGT	10.1055
AGUTTA	10.0995
AGUTTC	10.1049
AGUTTG	10.0383
AGUTTT	10.0476
ATUAAA	10.0813
ATUAAC	10.0293
ATUAAG	10.0211
ATUAAT	10.1202
ATUACA	10.0738
ATUACC	9.98622
ATUACG	10.0346
ATUACT	10.0939
ATUAGA	9.9858
ATUAGC	10.0515
ATUAGG	9.97091
ATUAGT	9.9629
ATUATA	10.137
ATUATC	10.1132
ATUATG	10.0596
ATUATT	10.0845
ATUCAA	10.1079
ATUCAC	10.0955
ATUCAG	9.90378
ATUCAT	10.0378
ATUCCA	10.0805
ATUCCC	10.1538
ATUCCG	10.0826
ATUCCT	10.0684
ATUCGA	10.0957
ATUCGC	10.1854
ATUCGG	10.0047
ATUCGT	10.1134
ATUCTA	10.0588
ATUCTC	10.1379
ATUCTG	10.0485
ATUCTT	10.1388
ATUGAA	10.068
ATUGAC	10.0809
ATUGAG	10.1068
ATUGAT	10.026
ATUGCA	10.1349
ATUGCC	10.0938
ATUGCG	10.1346
ATUGCT	10.0718
ATUGGA	10.0915
ATUGGC	10.1567
ATUGGG	10.055
ATUGGT	10.176
ATUGTA	10.1645
ATUGTC	10.1539
ATUGTG	10.17
ATUGTT	10.1322
ATUTAA	9.88041
ATUTAC	9.91683
ATUTAG	9.88791
ATUTAT	10.0349
ATUTCA	9.91516
ATUTCC	9.91127
ATUTCG	9.87833
ATUTCT	9.99943
ATUTGA	9.88817
ATUTGC	9.99585
ATUTGG	9.84359
ATUTGT	9.93119
ATUTTA	10.0039
ATUTTC	9.989
ATUTTG	10.0065
ATUTTT	10.0363
CAUAAA	10.1812
CAUAAC	10.1794
CAUAAG	10.1147
CAUAAT	10.1242
CAUACA	10.1699
CAUACC	10.2187
CAUACG	10.2049
CAUACT	10.1905
CAUAGA	10.1568
CAUAGC	10.1808
CAUAGG	10.0724
CAUAGT	10.1345
CAUATA	10.2489
CAUATC	10.2546
CAUATG	10.2155
CAUATT	10.2107
CAUCAA	10.2041
CAUCAC	10.3265
CAUCAG	10.1012
CAUCAT	10.183
CAUCCA	10.3246
CAUCCC	10.3493
CAUCCG	10.2891
CAUCCT	10.2874
CAUCGA	10.2415
CAUCGC	10.3992
CAUCGG	10.1686
CAUCGT	10.237
CAUCTA	10.1929
CAUCTC	10.3728
CAUCTG	10.1714
CAUCTT	10.2026
CAUGAA	10.2151
CAUGAC	10.286
CAUGAG	10.0791
CAUGAT	10.1495
CAUGCA	10.3041
CAUGCC	10.362
CAUGCG	10.3306
CAUGCT	10.2135
CAUGGA	10.2386
CAUGGC	10.3676
CAUGGG	10.2358
CAUGGT	10.3412
CAUGTA	10.234
CAUGTC	10.4213
CAUGTG	10.1729
CAUGTT	10.2299
CAUTAA	10.1684
CAUTAC	10.1497
CAUTAG	10.0038
CAUTAT	10.1279
CAUTCA	10.1156
CAUTCC	10.098
CAUTCG	10.12
CAUTCT	10.1859
CAUTGA	10.0643
CAUTGC	10.1968
CAUTGG	10.0325
CAUTGT	10.1757
CAUTTA	10.1625
CAUTTC	10.1363
CAUTTG	10.1697
CAUTTT	10.1923
CCUAAA	10.0982
CCUAAC	10.1528
CCUAAG	10.0027
CCUAAT	10.0793
CCUACA	10.17
CCUACC	10.1424
CCUACG	10.1514
CCUACT	10.1591
CCUAGA	10.1172
CCUAGC	10.1673
CCUAGG	10.1035
CCUAGT	10.1113
CCUATA	10.1432
CCUATC	10.2587
CCUATG	10.1418
CCUATT	10.1837
CCUCAA	10.1481
CCUCAC	10.2425
CCUCAG	10.0746
CCUCAT	10.1451
CCUCCA	10.2505
CCUCCC	10.3872
CCUCCG	10.3061
CCUCCT	10.2226
CCUCGA	10.192
CCUCGC	10.3933
CCUCGG	10.2117
CCUCGT	10.3021
CCUCTA	10.2359
CCUCTC	10.3768
CCUCTG	10.2611
CCUCTT	10.1446
CCUGAA	10.1498
CCUGAC	10.1496
CCUGAG	10.0906
CCUGAT	10.1338
CCUGCA	10.2756
CCUGCC	10.2921
CCUGCG	10.2162
CCUGCT	10.138
CCUGGA	10.158
CCUGGC	10.3275
CCUGGG	10.1927
CCUGGT	10.2313
CCUGTA	10.2452
CCUGTC	10.3496
CCUGTG	10.2707
CCUGTT	10.2308
CCUTAA	10.0577
CCUTAC	10.06
CCUTAG	9.9377
CCUTAT	10.0599
CCUTCA	10.0509
CCUTCC	10.0116
CCUTCG	10.0325
CCUTCT	10.0474
CCUTGA	10.1104
CCUTGC	10.1291
CCUTGG	9.96934
CCUTGT	10.0972
CCUTTA	10.1288
CCUTTC	10.03
CCUTTG	10.0359
CCUTTT	10.0295
CGUAAA	10.1159
CGUAAC	10.1327
CGUAAG	10.0044
CGUAAT	10.0847
CGUACA	10.1732
CGUACC	10.2542
CGUACG	10.1736
CGUACT	10.1566
CGUAGA	10.1192
CGUAGC	10.1781
CGUAGG	10.1236
CGUAGT	10.1829
CGUATA	10.1583
CGUATC	10.2518
CGUATG	10.119
CGUATT	10.1205
CGUCAA	10.3111
CGUCAC	10.4193
CGUCAG	10.1845
CGUCAT	10.2726
CGUCCA	10.4149
CGUCCC	10.5066
CGUCCG	10.4125
CGUCCT	10.4646
CGUCGA	10.3328
CGUCGC	10.4143
CGUCGG	10.3476
CGUCGT	10.3739
CGUCTA	10.3113
CGUCTC	10.4011
CGUCTG	10.3685
CGUCTT	10.3203
CGUGAA	10.1291
CGUGAC	10.1806
CGUGAG	9.97593
CGUGAT	10.1558
CGUGCA	10.3063
CGUGCC	10.3715
CGUGCG	10.3622
CGUGCT	10.2421
CGUGGA	10.2071
CGUGGC	10.392
CGUGGG	10.234
CGUGGT	10.272
CGUGTA	10.3149
CGUGTC	10.3014
CGUGTG	10.2624
CGUGTT	10.3005
CGUTAA	10.0102
CGUTAC	10.0879
CGUTAG	10.0632
CGUTAT	10.0851
CGUTCA	10.0707
CGUTCC	10.1721
CGUTCG	10.0668
CGUTCT	10.1169
CGUTGA	10.0481
CGUTGC	10.2204
CGUTGG	9.99024
CGUTGT	10.1354
CGUTTA	10.0502
CGUTTC	10.1436
CGUTTG	10.0549
CGUTTT	10.1119
CTUAAA	10.1006
CTUAAC	10.0524
CTUAAG	10.0132
CTUAAT	10.1358
CTUACA	10.035
CTUACC	10.0182
CTUACG	9.99892
CTUACT	10.0172
CTUAGA	10.0789
CTUAGC	10.065
CTUAGG	10.1121
CTUAGT	9.98955
CTUATA	10.0631
CTUATC	10.0639
CTUATG	10.0983
CTUATT	10.1082
CTUCAA	10.0972
CTUCAC	10.1379
CTUCAG	10.0747
CTUCAT	10.0899
CTUCCA	10.185
CTUCCC	10.2364
CTUCCG	10.192
CTUCCT	10.0782
CTUCGA	10.0565
CTUCGC	10.3257
CTUCGG	10.1208
CTUCGT	10.1605
CTUCTA	10.0709
CTUCTC	10.1541
CTUCTG	10.1277
CTUCTT	10.065
CTUGAA	10.0063
CTUGAC	10.1306
CTUGAG	9.96792
CTUGAT	10.1171
CTUGCA	10.0875
CTUGCC	10.1309
CTUGCG	10.155
CTUGCT	10.1799
CTUGGA	10.1292
CTUGGC	10.2174
CTUGGG	10.0917
CTUGGT	10.1953
CTUGTA	10.1326
CTUGTC	10.1681
CTUGTG	10.1282
CTUGTT	10.2116
CTUTAA	9.96905
CTUTAC	9.90148
CTUTAG	9.86723
CTUTAT	9.98024
CTUTCA	10.0475
CTUTCC	10.0098
CTUTCG	9.91075
CTUTCT	9.90017
CTUTGA	9.82775
CTUTGC	9.96532
CTUTGG	9.93048
CTUTGT	9.98943
CTUTTA	10.0259
CTUTTC	9.93331
CTUTTG	9.90214
CTUTTT	9.98236
GAUAAA	10.232
GAUAAC	10.222
GAUAAG	10.1011
GAUAAT	10.2084
GAUACA	10.1997
GAUACC	10.2975
GAUACG	10.2568
GAUACT	10.1521
GAUAGA	10.1413
GAUAGC	10.2785
GAUAGG	10.1388
GAUAGT	10.2174
GAUATA	10.2344
GAUATC	10.2736
GAUATG	10.2212
GAUATT	10.2517
GAUCAA	10.2171
GAUCAC	10.3539
GAUCAG	10.1575
GAUCAT	10.3003
GAUCCA	10.3882
GAUCCC	10.4901
GAUCCG	10.4093
GAUCCT	10.3887
GAUCGA	10.3331
GAUCGC	10.3667
GAUCGG	10.2809
GAUCGT	10.2626
GAUCTA	10.3356
GAUCTC	10.4428
GAUCTG	10.326
GAUCTT	10.3215
GAUGAA	10.2113
GAUGAC	10.2587
GAUGAG	10.11
GAUGAT	10.2504
GAUGCA	10.3721
GAUGCC	10.4312
GAUGCG	10.3731
GAUGCT	10.2425
GAUGGA	10.3356
GAUGGC	10.4299
GAUGGG	10.2638
GAUGGT	10.3414
GAUGTA	10.3576
GAUGTC	10.3117
GAUGTG	10.2876
GAUGTT	10.2993
GAUTAA	10.1602
GAUTAC	10.1417
GAUTAG	10.0135
GAUTAT	10.1398
GAUTCA	10.2314
GAUTCC	10.272
GAUTCG	10.1335
GAUTCT	10.1565
GAUTGA	10.1296
GAUTGC	10.2237
GAUTGG	10.1229
GAUTGT	10.1284
GAUTTA	10.2818
GAUTTC	10.1963
GAUTTG	10.1644
GAUTTT	10.1627
GCUAAA	10.0472
GCUAAC	10.1471
GCUAAG	10.0482
GCUAAT	10.0886
GCUACA	10.1468
GCUACC	10.194
GCUACG	10.1839
GCUACT	10.095
GCUAGA	10.0579
GCUAGC	10.1526
GCUAGG	10.0739
GCUAGT	10.1442
GCUATA	10.1658
GCUATC	10.1896
GCUATG	10.1424
GCUATT	10.1022
GCUCAA	10.176
GCUCAC	10.278
GCUCAG	10.0856
GCUCAT	10.1441
GCUCCA	10.3023
GCUCCC	10.3247
GCUCCG	10.3831
GCUCCT	10.2986
GCUCGA	10.2114
GCUCGC	10.3514
GCUCGG	10.1992
GCUCGT	10.261
GCUCTA	10.1548
GCUCTC	10.2663
GCUCTG	10.2654
GCUCTT	10.271
GCUGAA	10.1306
GCUGAC	10.175
GCUGAG	10.0582
GCUGAT	10.1356
GCUGCA	10.2867
GCUGCC	10.2996
GCUGCG	10.2751
GCUGCT	10.2486
GCUGGA	10.2321
GCUGGC	10.3281
GCUGGG	10.2977
GCUGGT	10.2651
GCUGTA	10.2341
GCUGTC	10.2842
GCUGTG	10.222
GCUGTT	10.2374
GCUTAA	10.0043
GCUTAC	10.0953
GCUTAG	9.93534
GCUTAT	9.99257
GCUTCA	10.0346
GCUTCC	10.0379
GCUTCG	10.1395
GCUTCT	10.0386
GCUTGA	9.96725
GCUTGC	10.1054
GCUTGG	9.93141
GCUTGT	10.0228
GCUTTA	10.0297
GCUTTC	10.1093
GCUTTG	10.0079
GCUTTT	9.96849
GGUAAA	10.1266
GGUAAC	10.145
GGUAAG	10.0157
GGUAAT	10.0757
GGUACA	10.204
GGUACC	10.2662
GGUACG	10.1786
GGUACT	10.1284
GGUAGA	10.0309
GGUAGC	10.1563
GGUAGG	10.0775
GGUAGT	10.1539
GGUATA	10.0836
GGUATC	10.2114
GGUATG	10.1569
GGUATT	10.0943
GGUCAA	10.3244
GGUCAC	10.3644
GGUCAG	10.1394
GGUCAT	10.273
GGUCCA	10.5087
GGUCCC	10.525
GGUCCG	10.4721
GGUCCT	10.4305
GGUCGA	10.2995
GGUCGC	10.4551
GGUCGG	10.2879
GGUCGT	10.3922
GGUCTA	10.3712
GGUCTC	10.4417
GGUCTG	10.3685
GGUCTT	10.4099
GGUGAA	10.1598
GGUGAC	10.245
GGUGAG	10.0122
GGUGAT	10.1451
GGUGCA	10.2872
GGUGCC	10.3418
GGUGCG	10.3478
GGUGCT	10.3226
GGUGGA	10.2432
GGUGGC	10.3492
GGUGGG	10.2447
GGUGGT	10.3882
GGUGTA	10.2023
GGUGTC	10.3683
GGUGTG	10.2563
GGUGTT	10.2559
GGUTAA	10.0993
GGUTAC	10.1407
GGUTAG	10.0515
GGUTAT	10.0336
GGUTCA	10.1886
GGUTCC	10.1263
GGUTCG	10.1465
GGUTCT	10.1925
GGUTGA	10.1495
GGUTGC	10.2211
GGUTGG	10.0443
GGUTGT	10.1415
GGUTTA	10.1412
GGUTTC	10.1918
GGUTTG	10.1354
GGUTTT	10.1736
GTUAAA	10.0206
GTUAAC	10.0603
GTUAAG	9.95232
GTUAAT	10.1029
GTUACA	10.1117
GTUACC	10.1138
GTUACG	10.0033
GTUACT	10.0317
GTUAGA	10.0616
GTUAGC	10.0462
GTUAGG	10.0135
GTUAGT	10.0303
GTUATA	10.0916
GTUATC	10.0927
GTUATG	10.06
GTUATT	10.0629
GTUCAA	10.1058
GTUCAC	10.1677
GTUCAG	10.0225
GTUCAT	10.165
GTUCCA	10.2296
GTUCCC	10.3856
GTUCCG	10.1848
GTUCCT	10.2219
GTUCGA	10.1048
GTUCGC	10.2717
GTUCGG	10.1162
GTUCGT	10.1286
GTUCTA	10.1223
GTUCTC	10.1974
GTUCTG	10.1446
GTUCTT	10.175
GTUGAA	10.0843
GTUGAC	10.1181
GTUGAG	10.0443
GTUGAT	10.1197
GTUGCA	10.1723
GTUGCC	10.1943
GTUGCG	10.1696
GTUGCT	10.1373
GTUGGA	10.1587
GTUGGC	10.1888
GTUGGG	10.1435
GTUGGT	10.2259
GTUGTA	10.1125
GTUGTC	10.2541
GTUGTG	10.1244
GTUGTT	10.1372
GTUTAA	10.0287
GTUTAC	9.96162
GTUTAG	9.90818
GTUTAT	9.93887
GTUTCA	9.96451
GTUTCC	9.97508
GTUTCG	9.98568
GTUTCT	9.98415
GTUTGA	9.87866
GTUTGC	9.96414
GTUTGG	9.89628
GTUTGT	9.94401
GTUTTA	10.0323
GTUTTC	9.98197
GTUTTG	9.95256
GTUTTT	10.0532
TAUAAA	10.1305
TAUAAC	10.1497
TAUAAG	10.0083
TAUAAT	10.128
TAUACA	10.1753
TAUACC	10.1386
TAUACG	10.0266
TAUACT	10.1026
TAUAGA	10.1334
TAUAGC	10.1419
TAUAGG	10.0856
TAUAGT	10.1938
TAUATA	10.2109
TAUATC	10.2051
TAUATG	10.1718
TAUATT	10.2116
TAUCAA	10.094
TAUCAC	10.1265
TAUCAG	9.98305
TAUCAT	10.1479
TAUCCA	10.1516
TAUCCC	10.1045
TAUCCG	10.073
TAUCCT	10.1692
TAUCGA	10.0399
TAUCGC	10.1828
TAUCGG	10.0633
TAUCGT	10.1002
TAUCTA	10.1819
TAUCTC	10.1607
TAUCTG	10.1063
TAUCTT	10.158
TAUGAA	10.1477
TAUGAC	10.1222
TAUGAG	9.93607
TAUGAT	10.1135
TAUGCA	10.1386
TAUGCC	10.2091
TAUGCG	10.1575
TAUGCT	10.1297
TAUGGA	10.1991
TAUGGC	10.2617
TAUGGG	10.1403
TAUGGT	10.1835
TAUGTA	10.2517
TAUGTC	10.3387
TAUGTG	10.1687
TAUGTT	10.2322
TAUTAA	10.1247
TAUTAC	10.0746
TAUTAG	9.93822
TAUTAT	10.0788
TAUTCA	10.0444
TAUTCC	10.1066
TAUTCG	10.039
TAUTCT	10.101
TAUTGA	10.075
TAUTGC	10.0767
TAUTGG	10.0489
TAUTGT	10.0848
TAUTTA	10.1478
TAUTTC	10.1652
TAUTTG	10.1098
TAUTTT	10.1545
TCUAAA	10.1034
TCUAAC	10.1012
TCUAAG	10.0866
TCUAAT	10.0743
TCUACA	10.1179
TCUACC	10.0723
TCUACG	10.0964
TCUACT	10.0955
TCUAGA	10.0362
TCUAGC	10.1178
TCUAGG	9.9626
TCUAGT	10.0376
TCUATA	10.0909
TCUATC	10.1628
TCUATG	10.0636
TCUATT	10.1281
TCUCAA	10.1171
TCUCAC	10.1255
TCUCAG	10.0134
TCUCAT	10.0746
TCUCCA	10.1194
TCUCCC	10.2064
TCUCCG	10.0929
TCUCCT	10.1345
TCUCGA	10.1826
TCUCGC	10.1788
TCUCGG	10.0918
TCUCGT	10.1783
TCUCTA	10.1199
TCUCTC	10.1411
TCUCTG	10.0188
TCUCTT	10.1172
TCUGAA	10.0064
TCUGAC	9.98423
TCUGAG	9.9697
TCUGAT	10.066
TCUGCA	10.1134
TCUGCC	10.1415
TCUGCG	10.0772
TCUGCT	10.0779
TCUGGA	10.0916
TCUGGC	10.232
TCUGGG	10.0496
TCUGGT	10.2127
TCUGTA	10.1018
TCUGTC	10.1342
TCUGTG	10.112
TCUGTT	10.2059
TCUTAA	9.94276
TCUTAC	9.99106
TCUTAG	9.83745
TCUTAT	10.0095
TCUTCA	9.947
TCUTCC	9.86513
TCUTCG	9.93569
TCUTCT	9.90823
TCUTGA	9.84285
TCUTGC	9.9585
TCUTGG	9.83965
TCUTGT	9.98005
TCUTTA	9.95284
TCUTTC	9.97467
TCUTTG	9.97749
TCUTTT	10.0031
TGUAAA	10.107
TGUAAC	10.0568
TGUAAG	9.90459
TGUAAT	10.0984
TGUACA	10.1195
TGUACC	10.1114
TGUACG	10.1176
TGUACT	10.1576
TGUAGA	10.0807
TGUAGC	10.1525
TGUAGG	10.0611
TGUAGT	10.0477
TGUATA	10.0658
TGUATC	10.1476
TGUATG	10.0393
TGUATT	10.0693
TGUCAA	10.1593
TGUCAC	10.21
TGUCAG	10.0658
TGUCAT	10.157
TGUCCA	10.3449
TGUCCC	10.4415
TGUCCG	10.2201
TGUCCT	10.3327
TGUCGA	10.1939
TGUCGC	10.3689
TGUCGG	10.1529
TGUCGT	10.1908
TGUCTA	10.2018
TGUCTC	10.2784
TGUCTG	10.1547
TGUCTT	10.1849
TGUGAA	10.0713
TGUGAC	10.0805
TGUGAG	9.86173
TGUGAT	10.0667
TGUGCA	10.1922
TGUGCC	10.2415
TGUGCG	10.173
TGUGCT	10.1306
TGUGGA	10.1512
TGUGGC	10.3237
TGUGGG	10.137
TGUGGT	10.265
TGUGTA	10.1855
TGUGTC	10.198
TGUGTG	10.1306
TGUGTT	10.099
TGUTAA	10.0364
TGUTAC	9.94647
TGUTAG	9.88
TGUTAT	10.0303
TGUTCA	10.0794
TGUTCC	10.0347
TGUTCG	10.0567
TGUTCT	10.0414
TGUTGA	10.0229
TGUTGC	10.0686
TGUTGG	9.9316
TGUTGT	10.0137
TGUTTA	10.0726
TGUTTC	10.0939
TGUTTG	10.0919
TGUTTT	10.0907
TTUAAA	10.0795
TTUAAC	10.0541
TTUAAG	9.99194
TTUAAT	10.0156
TTUACA	9.93661
TTUACC	9.96443
TTUACG	10.0166
TTUACT	9.97796
TTUAGA	9.93963
TTUAGC	9.96673
TTUAGG	10.0257
TTUAGT	9.99309
TTUATA	10.112
TTUATC	10.085
TTUATG	10.0519
TTUATT	10.0627
TTUCAA	10.0348
TTUCAC	10.0972
TTUCAG	9.93534
TTUCAT	10.0199
TTUCCA	10.0625
TTUCCC	10.1241
TTUCCG	10.0863
TTUCCT	10.0322
TTUCGA	10.0324
TTUCGC	10.2053
TTUCGG	10.056
TTUCGT	10.0246
TTUCTA	10.047
TTUCTC	10.0736
TTUCTG	10.0195
TTUCTT	10.0559
TTUGAA	9.98375
TTUGAC	9.98944
TTUGAG	9.89852
TTUGAT	10.0199
TTUGCA	10.0875
TTUGCC	10.1114
TTUGCG	10.0389
TTUGCT	10.0648
TTUGGA	10.0263
TTUGGC	10.1684
TTUGGG	10.0551
TTUGGT	10.0609
TTUGTA	10.1394
TTUGTC	10.0784
TTUGTG	10.0788
TTUGTT	10.096
TTUTAA	9.97469
TTUTAC	9.89818
TTUTAG	9.77171
TTUTAT	9.99154
TTUTCA	9.89251
TTUTCC	9.89869
TTUTCG	9.87219
TTUTCT	9.98604
TTUTGA	9.85364
TTUTGC	9.94986
TTUTGG	9.68863
TTUTGT	9.97351
TTUTTA	10.0122
TTUTTC	9.95489
TTUTTG	9.96847
TTUTTT	9.95055

## Sheet: ARP_NNUNNN_raw
Name	Low_488scan	High_488scan	MASLINER_adj	Flags	Sequence	Norm
UDG_UG_f1GA_f2ACG	28148	51207	52885	0	CGCGAGCTCGAUACGCTCGCGGGAACGCGAGCGTGTCGAGCTCGCGACACTCTTTCCCTTTTTTTTTT	54913
UDG_UG_f1GG_f2GGT	30580	55441	57223	0	CGCGAGCTCGGUGGTCTCGCGGGAACGCGAGACCGCCGAGCTCGCGACACTCTTTCCCTTTTTTTTTT	59417.3
UDG_UG_f1CT_f2TTG	24061	43899	43899	0	CGCGAGCTCCTUTTGCTCGCGGGAACGCGAGCAAGAGGAGCTCGCGACACTCTTTCCCTTTTTTTTTT	45582.4
UDG_UG_f1CC_f2CTG	27569	50727	51853	0	CGCGAGCTCCCUCTGCTCGCGGGAACGCGAGCAGGGGGAGCTCGCGACACTCTTTCCCTTTTTTTTTT	53841.4
UDG_UG_f1CC_f2ACT	27352	49917	49917	0	CGCGAGCTCCCUACTCTCGCGGGAACGCGAGAGTGGGGAGCTCGCGACACTCTTTCCCTTTTTTTTTT	51831.2
UDG_UG_f1CG_f2CTC	31861	57857	59507	0	CGCGAGCTCCGUCTCCTCGCGGGAACGCGAGGAGGCGGAGCTCGCGACACTCTTTCCCTTTTTTTTTT	61788.9
UDG_UG_f1TT_f2CGC	27817	50935	52295	0	CGCGAGCTCTTUCGCCTCGCGGGAACGCGAGGCGGAAGAGCTCGCGACACTCTTTCCCTTTTTTTTTT	54199.9
UDG_UG_f1GC_f2CGT	29745	54302	55734	0	CGCGAGCTCGCUCGTCTCGCGGGAACGCGAGACGGGCGAGCTCGCGACACTCTTTCCCTTTTTTTTTT	57718.2
UDG_UG_f1TT_f2TCC	22684	41608	41608	0	CGCGAGCTCTTUTCCCTCGCGGGAACGCGAGGGAGAAGAGCTCGCGACACTCTTTCCCTTTTTTTTTT	42963.6
UDG_UG_f1CC_f2CTC	28616	52583	53720	0	CGCGAGCTCCCUCTCCTCGCGGGAACGCGAGGAGGGGGAGCTCGCGACACTCTTTCCCTTTTTTTTTT	55734.3
UDG_UG_f1CA_f2TCG	25205	46242	46242	0	CGCGAGCTCCAUTCGCTCGCGGGAACGCGAGCGAGTGGAGCTCGCGACACTCTTTCCCTTTTTTTTTT	47998.7
UDG_MM_AA	7828	14271	14271	0	CGCGAGCTCACACTTACCGCGGGAACGCGGTAAGAGTGAGCTCGCGACACTCTTTCCCTTTTTTTTTT	14818.3
UDG_UG_f1TG_f2ATA	25395	46379	46379	0	CGCGAGCTCTGUATACTCGCGGGAACGCGAGTATGCAGAGCTCGCGACACTCTTTCCCTTTTTTTTTT	48140.9
UDG_UG_f1AT_f2TGA	22430	41144	41144	0	CGCGAGCTCATUTGACTCGCGGGAACGCGAGTCAGATGAGCTCGCGACACTCTTTCCCTTTTTTTTTT	42659.2
UDG_UG_f1TT_f2GTC	26218	48034	48034	0	CGCGAGCTCTTUGTCCTCGCGGGAACGCGAGGACGAAGAGCTCGCGACACTCTTTCCCTTTTTTTTTT	49802.9
UDG_UG_f1AA_f2ACT	27360	50371	51480	0	CGCGAGCTCAAUACTCTCGCGGGAACGCGAGAGTGTTGAGCTCGCGACACTCTTTCCCTTTTTTTTTT	53612.5
UDG_UG_f1GT_f2AGA	24326	44533	44533	0	CGCGAGCTCGTUAGACTCGCGGGAACGCGAGTCTGACGAGCTCGCGACACTCTTTCCCTTTTTTTTTT	45785.6
UDG_UG_f1GC_f2GTA	28471	52747	53462	0	CGCGAGCTCGCUGTACTCGCGGGAACGCGAGTACGGCGAGCTCGCGACACTCTTTCCCTTTTTTTTTT	54803.1
UDG_UG_f1CC_f2TGA	24976	45874	45874	0	CGCGAGCTCCCUTGACTCGCGGGAACGCGAGTCAGGGGAGCTCGCGACACTCTTTCCCTTTTTTTTTT	47022.8
UDG_UG_f1GA_f2ACT	27656	50861	52008	0	CGCGAGCTCGAUACTCTCGCGGGAACGCGAGAGTGTCGAGCTCGCGACACTCTTTCCCTTTTTTTTTT	53110.3
UDG_UG_f1TG_f2ATG	25877	47416	47416	0	CGCGAGCTCTGUATGCTCGCGGGAACGCGAGCATGCAGAGCTCGCGACACTCTTTCCCTTTTTTTTTT	48351.2
UDG_UG_f1GG_f2GCA	30459	55701	57007	0	CGCGAGCTCGGUGCACTCGCGGGAACGCGAGTGCGCCGAGCTCGCGACACTCTTTCCCTTTTTTTTTT	58215.2
UDG_UG_random_5U	44289	65535	81671	0	CGCGCGAGUUAACUUUGCGCGGGAACGCGCGGGGTTGGCTCGCGCGACACTCTTTCCCTTTTTTTTTT	83485.2
UDG_UG_f1TA_f2ACC	26968	49605	49605	0	CGCGAGCTCTAUACCCTCGCGGGAACGCGAGGGTGTAGAGCTCGCGACACTCTTTCCCTTTTTTTTTT	50640.3
UDG_UG_f1TT_f2TAT	23929	44082	44082	0	CGCGAGCTCTTUTATCTCGCGGGAACGCGAGATAGAAGAGCTCGCGACACTCTTTCCCTTTTTTTTTT	44900.1
UDG_UG_f1AC_f2TTC	24142	44195	44195	0	CGCGAGCTCACUTTCCTCGCGGGAACGCGAGGAAGGTGAGCTCGCGACACTCTTTCCCTTTTTTTTTT	44883.3
UDG_UG_random_4U	41221	65535	76200	0	CGCGCUCUGUUCTGTCCCGCGGGAACGCGGGACAGGGCGGGGCGCGACACTCTTTCCCTTTTTTTTTT	77329.7
UDG_UG_f1TT_f2ATG	24835	45593	45593	0	CGCGAGCTCTTUATGCTCGCGGGAACGCGAGCATGAAGAGCTCGCGACACTCTTTCCCTTTTTTTTTT	46260.1
UDG_UG_f1CA_f2GAA	27112	49600	49600	0	CGCGAGCTCCAUGAACTCGCGGGAACGCGAGTTCGTGGAGCTCGCGACACTCTTTCCCTTTTTTTTTT	50372.5
UDG_UG_f1CC_f2TAT	24450	44802	44802	0	CGCGAGCTCCCUTATCTCGCGGGAACGCGAGATAGGGGAGCTCGCGACACTCTTTCCCTTTTTTTTTT	45391.6
UDG_random_6b_8	8944	16410	16410	0	CGCGAGCTCAATACACTCGCGGGAACGCGAGTGTATTGAGCTCGCGACACTCTTTCCCTTTTTTTTTT	16656.4
UDG_UG_f1GG_f2TCA	26575	49017	49017	0	CGCGAGCTCGGUTCACTCGCGGGAACGCGAGTGAGCCGAGCTCGCGACACTCTTTCCCTTTTTTTTTT	49920.4
UDG_UG_f1CT_f2GAG	24014	44079	44079	0	CGCGAGCTCCTUGAGCTCGCGGGAACGCGAGCTCGAGGAGCTCGCGACACTCTTTCCCTTTTTTTTTT	44891.4
UDG_UG_f1CA_f2GTC	29770	54426	55778	0	CGCGAGCTCCAUGTCCTCGCGGGAACGCGAGGACGTGGAGCTCGCGACACTCTTTCCCTTTTTTTTTT	56810.8
UDG_UG_f1AT_f2GTA	26020	48134	48134	0	CGCGAGCTCATUGTACTCGCGGGAACGCGAGTACGATGAGCTCGCGACACTCTTTCCCTTTTTTTTTT	49025.3
UDG_UG_f1GA_f2GTA	29243	53706	54838	0	CGCGAGCTCGAUGTACTCGCGGGAACGCGAGTACGTCGAGCTCGCGACACTCTTTCCCTTTTTTTTTT	55606.4
UDG_UG_f1GA_f2CTC	31110	56976	58168	0	CGCGAGCTCGAUCTCCTCGCGGGAACGCGAGGAGGTCGAGCTCGCGACACTCTTTCCCTTTTTTTTTT	59245.1
UDG_UG_f1TT_f2TTC	23488	43032	43032	0	CGCGAGCTCTTUTTCCTCGCGGGAACGCGAGGAAGAAGAGCTCGCGACACTCTTTCCCTTTTTTTTTT	43678.2
UDG_UG_f1TC_f2GCA	26421	48244	48244	0	CGCGAGCTCTCUGCACTCGCGGGAACGCGAGTGCGGAGAGCTCGCGACACTCTTTCCCTTTTTTTTTT	49028.4
UDG_UG_f1CT_f2CGC	28319	51719	53190	0	CGCGAGCTCCTUCGCCTCGCGGGAACGCGAGGCGGAGGAGCTCGCGACACTCTTTCCCTTTTTTTTTT	54300.1
UDG_UG_random_6U	57920	65535	105981	0	CGCGUCUCUUTUACUCCCGCGGGAACGCGGGGGTGAGGGGGGCGCGACACTCTTTCCCTTTTTTTTTT	108033
UDG_UG_f1CT_f2TAA	23525	43066	43066	0	CGCGAGCTCCTUTAACTCGCGGGAACGCGAGTTAGAGGAGCTCGCGACACTCTTTCCCTTTTTTTTTT	44078.8
UDG_UG_f1CG_f2AGT	26214	47919	47919	0	CGCGAGCTCCGUAGTCTCGCGGGAACGCGAGACTGCGGAGCTCGCGACACTCTTTCCCTTTTTTTTTT	49045.9
UDG_UG_f1GG_f2ACT	27187	49714	49714	0	CGCGAGCTCGGUACTCTCGCGGGAACGCGAGAGTGCCGAGCTCGCGACACTCTTTCCCTTTTTTTTTT	50634.5
UDG_UG_f1CG_f2GTC	29624	54440	55518	0	CGCGAGCTCCGUGTCCTCGCGGGAACGCGAGGACGCGGAGCTCGCGACACTCTTTCCCTTTTTTTTTT	56420.7
UDG_UG_f1GA_f2GTA	29412	53602	55140	0	CGCGAGCTCGAUGTACTCGCGGGAACGCGAGTACGTCGAGCTCGCGACACTCTTTCCCTTTTTTTTTT	55733.1
UDG_UG_f1TT_f2CGT	24720	45242	45242	0	CGCGAGCTCTTUCGTCTCGCGGGAACGCGAGACGGAAGAGCTCGCGACACTCTTTCCCTTTTTTTTTT	45633.8
UDG_UG_f1GA_f2AGC	28134	51606	52861	0	CGCGAGCTCGAUAGCCTCGCGGGAACGCGAGGCTGTCGAGCTCGCGACACTCTTTCCCTTTTTTTTTT	53444.2
UDG_UG_f1AA_f2CAC	28095	51586	52791	0	CGCGAGCTCAAUCACCTCGCGGGAACGCGAGGTGGTTGAGCTCGCGACACTCTTTCCCTTTTTTTTTT	53453.1
UDG_UG_f1CC_f2TAC	24984	45574	45574	0	CGCGAGCTCCCUTACCTCGCGGGAACGCGAGGTAGGGGAGCTCGCGACACTCTTTCCCTTTTTTTTTT	46167.9
UDG_UG_f1CG_f2TTA	26008	47538	47538	0	CGCGAGCTCCGUTTACTCGCGGGAACGCGAGTAAGCGGAGCTCGCGACACTCTTTCCCTTTTTTTTTT	48084.7
UDG_UG_f1CG_f2GTT	30136	55020	56431	0	CGCGAGCTCCGUGTTCTCGCGGGAACGCGAGAACGCGGAGCTCGCGACACTCTTTCCCTTTTTTTTTT	57156.8
UDG_UG_f1GT_f2CAT	26168	48155	48155	0	CGCGAGCTCGTUCATCTCGCGGGAACGCGAGATGGACGAGCTCGCGACACTCTTTCCCTTTTTTTTTT	48708.8
UDG_UG_f1AA_f2ACT	27759	50836	52192	0	CGCGAGCTCAAUACTCTCGCGGGAACGCGAGAGTGTTGAGCTCGCGACACTCTTTCCCTTTTTTTTTT	52584.5
UDG_UG_f1TT_f2TCT	24404	44500	44500	0	CGCGAGCTCTTUTCTCTCGCGGGAACGCGAGAGAGAAGAGCTCGCGACACTCTTTCCCTTTTTTTTTT	44780.4
UDG_UG_f1CT_f2GAC	26490	48343	48343	0	CGCGAGCTCCTUGACCTCGCGGGAACGCGAGGTCGAGGAGCTCGCGACACTCTTTCCCTTTTTTTTTT	48589.7
UDG_UG_f1GT_f2GAT	26012	47542	47542	0	CGCGAGCTCGTUGATCTCGCGGGAACGCGAGATCGACGAGCTCGCGACACTCTTTCCCTTTTTTTTTT	47887.6
UDG_UG_f1AC_f2CAT	26256	48082	48082	0	CGCGAGCTCACUCATCTCGCGGGAACGCGAGATGGGTGAGCTCGCGACACTCTTTCCCTTTTTTTTTT	48431.5
UDG_UG_f1AC_f2CCC	29751	54315	55744	0	CGCGAGCTCACUCCCCTCGCGGGAACGCGAGGGGGGTGAGCTCGCGACACTCTTTCCCTTTTTTTTTT	56226.8
UDG_UG_f1CG_f2ATA	26575	48648	48648	0	CGCGAGCTCCGUATACTCGCGGGAACGCGAGTATGCGGAGCTCGCGACACTCTTTCCCTTTTTTTTTT	49230.2
UDG_UG_f1GT_f2AAA	24678	45348	45348	0	CGCGAGCTCGTUAAACTCGCGGGAACGCGAGTTTGACGAGCTCGCGACACTCTTTCCCTTTTTTTTTT	46064.9
UDG_UG_f1CC_f2TTA	25327	46425	46425	0	CGCGAGCTCCCUTTACTCGCGGGAACGCGAGTAAGGGGAGCTCGCGACACTCTTTCCCTTTTTTTTTT	47536
UDG_UG_f1GG_f2ACC	31160	56952	58257	0	CGCGAGCTCGGUACCCTCGCGGGAACGCGAGGGTGCCGAGCTCGCGACACTCTTTCCCTTTTTTTTTT	59993
UDG_UG_f1AT_f2ACG	26780	49372	49372	0	CGCGAGCTCATUACGCTCGCGGGAACGCGAGCGTGATGAGCTCGCGACACTCTTTCCCTTTTTTTTTT	50989.3
UDG_UG_f1GT_f2AAT	26125	47818	47818	0	CGCGAGCTCGTUAATCTCGCGGGAACGCGAGATTGACGAGCTCGCGACACTCTTTCCCTTTTTTTTTT	49384.4
UDG_UG_f1AT_f2CTA	26069	47847	47847	0	CGCGAGCTCATUCTACTCGCGGGAACGCGAGTAGGATGAGCTCGCGACACTCTTTCCCTTTTTTTTTT	49414.4
UDG_UG_f1GG_f2TCG	25735	47021	47021	0	CGCGAGCTCGGUTCGCTCGCGGGAACGCGAGCGAGCCGAGCTCGCGACACTCTTTCCCTTTTTTTTTT	48561.3
UDG_UG_f1TA_f2GCC	26552	48616	48616	0	CGCGAGCTCTAUGCCCTCGCGGGAACGCGAGGGCGTAGAGCTCGCGACACTCTTTCCCTTTTTTTTTT	50208.6
UDG_UG_f1AA_f2TGT	23802	43518	43518	0	CGCGAGCTCAAUTGTCTCGCGGGAACGCGAGACAGTTGAGCTCGCGACACTCTTTCCCTTTTTTTTTT	44943.6
UDG_UG_f1CG_f2GAG	21916	40012	40012	0	CGCGAGCTCCGUGAGCTCGCGGGAACGCGAGCTCGCGGAGCTCGCGACACTCTTTCCCTTTTTTTTTT	41322.7
UDG_UG_f1GT_f2GCG	27243	49780	49780	0	CGCGAGCTCGTUGCGCTCGCGGGAACGCGAGCGCGACGAGCTCGCGACACTCTTTCCCTTTTTTTTTT	51688.9
UDG_UG_f1AA_f2TGC	27708	50981	52101	0	CGCGAGCTCAAUTGCCTCGCGGGAACGCGAGGCAGTTGAGCTCGCGACACTCTTTCCCTTTTTTTTTT	54098.9
UDG_UG_f1AT_f2GGC	27534	50402	51790	0	CGCGAGCTCATUGGCCTCGCGGGAACGCGAGGCCGATGAGCTCGCGACACTCTTTCCCTTTTTTTTTT	53776
UDG_UG_f1AT_f2TGC	23758	43426	43426	0	CGCGAGCTCATUTGCCTCGCGGGAACGCGAGGCAGATGAGCTCGCGACACTCTTTCCCTTTTTTTTTT	45091.3
UDG_UG_f1AG_f2GCT	27021	49082	49082	0	CGCGAGCTCAGUGCTCTCGCGGGAACGCGAGAGCGCTGAGCTCGCGACACTCTTTCCCTTTTTTTTTT	50964.2
UDG_UG_f1GC_f2CAA	27141	49851	49851	0	CGCGAGCTCGCUCAACTCGCGGGAACGCGAGTTGGGCGAGCTCGCGACACTCTTTCCCTTTTTTTTTT	51762.6
UDG_UG_f1TC_f2TGT	23814	43951	43951	0	CGCGAGCTCTCUTGTCTCGCGGGAACGCGAGACAGGAGAGCTCGCGACACTCTTTCCCTTTTTTTTTT	45551.9
UDG_UG_f1GG_f2CCG	31185	56780	58302	0	CGCGAGCTCGGUCCGCTCGCGGGAACGCGAGCGGGCCGAGCTCGCGACACTCTTTCCCTTTTTTTTTT	60377.6
UDG_UG_f1CC_f2TAC	24663	44983	44983	0	CGCGAGCTCCCUTACCTCGCGGGAACGCGAGGTAGGGGAGCTCGCGACACTCTTTCCCTTTTTTTTTT	46448.6
UDG_UG_f1GA_f2ACG	27054	49672	49672	0	CGCGAGCTCGAUACGCTCGCGGGAACGCGAGCGTGTCGAGCTCGCGACACTCTTTCCCTTTTTTTTTT	51534.6
UDG_UG_f1TC_f2ACG	24405	44990	44990	0	CGCGAGCTCTCUACGCTCGCGGGAACGCGAGCGTGGAGAGCTCGCGACACTCTTTCCCTTTTTTTTTT	46699.1
UDG_UG_f1AG_f2TGA	24246	44379	44379	0	CGCGAGCTCAGUTGACTCGCGGGAACGCGAGTCAGCTGAGCTCGCGACACTCTTTCCCTTTTTTTTTT	46080.8
UDG_UG_f1AT_f2CTG	24817	45421	45421	0	CGCGAGCTCATUCTGCTCGCGGGAACGCGAGCAGGATGAGCTCGCGACACTCTTTCCCTTTTTTTTTT	47146.5
UDG_UG_f1AA_f2CTG	27024	49534	49534	0	CGCGAGCTCAAUCTGCTCGCGGGAACGCGAGCAGGTTGAGCTCGCGACACTCTTTCCCTTTTTTTTTT	51358.2
UDG_UG_f1CC_f2GGA	27065	49947	49947	0	CGCGAGCTCCCUGGACTCGCGGGAACGCGAGTCCGGGGAGCTCGCGACACTCTTTCCCTTTTTTTTTT	51786.4
UDG_UG_f1TC_f2TGG	22023	40159	40159	0	CGCGAGCTCTCUTGGCTCGCGGGAACGCGAGCCAGGAGAGCTCGCGACACTCTTTCCCTTTTTTTTTT	41822.5
UDG_UG_f1AG_f2CAA	28257	51549	53080	0	CGCGAGCTCAGUCAACTCGCGGGAACGCGAGTTGGCTGAGCTCGCGACACTCTTTCCCTTTTTTTTTT	54573
UDG_UG_f1AT_f2CTG	25149	46189	46189	0	CGCGAGCTCATUCTGCTCGCGGGAACGCGAGCAGGATGAGCTCGCGACACTCTTTCCCTTTTTTTTTT	47347.7
UDG_UG_f1AT_f2CGA	25510	46681	46681	0	CGCGAGCTCATUCGACTCGCGGGAACGCGAGTCGGATGAGCTCGCGACACTCTTTCCCTTTTTTTTTT	47850
UDG_UG_f1TC_f2AAC	25225	46447	46447	0	CGCGAGCTCTCUAACCTCGCGGGAACGCGAGGTTGGAGAGCTCGCGACACTCTTTCCCTTTTTTTTTT	47431.4
UDG_UG_f1CA_f2ACG	27263	50115	51307	0	CGCGAGCTCCAUACGCTCGCGGGAACGCGAGCGTGTGGAGCTCGCGACACTCTTTCCCTTTTTTTTTT	52319
UDG_UG_f1GT_f2CAT	26861	49218	49218	0	CGCGAGCTCGTUCATCTCGCGGGAACGCGAGATGGACGAGCTCGCGACACTCTTTCCCTTTTTTTTTT	50261.2
UDG_UG_f1GC_f2GTC	31569	57850	58986	0	CGCGAGCTCGCUGTCCTCGCGGGAACGCGAGGACGGCGAGCTCGCGACACTCTTTCCCTTTTTTTTTT	60296.3
UDG_UG_f1AG_f2CCG	30139	54984	56436	0	CGCGAGCTCAGUCCGCTCGCGGGAACGCGAGCGGGCTGAGCTCGCGACACTCTTTCCCTTTTTTTTTT	57613.8
UDG_UG_f1CA_f2TTG	26525	48694	48694	0	CGCGAGCTCCAUTTGCTCGCGGGAACGCGAGCAAGTGGAGCTCGCGACACTCTTTCCCTTTTTTTTTT	49597.7
UDG_UG_f1GA_f2CCC	31981	58950	59721	0	CGCGAGCTCGAUCCCCTCGCGGGAACGCGAGGGGGTCGAGCTCGCGACACTCTTTCCCTTTTTTTTTT	60651.1
UDG_UG_f1GT_f2GCG	27091	49456	49456	0	CGCGAGCTCGTUGCGCTCGCGGGAACGCGAGCGCGACGAGCTCGCGACACTCTTTCCCTTTTTTTTTT	50189.2
UDG_UG_f1CG_f2TGC	27870	50956	52390	0	CGCGAGCTCCGUTGCCTCGCGGGAACGCGAGGCAGCGGAGCTCGCGACACTCTTTCCCTTTTTTTTTT	53156.6
UDG_UG_f1AC_f2CCA	27916	51055	52472	0	CGCGAGCTCACUCCACTCGCGGGAACGCGAGTGGGGTGAGCTCGCGACACTCTTTCCCTTTTTTTTTT	53289.2
UDG_UG_f1AC_f2CAC	27720	50676	52122	0	CGCGAGCTCACUCACCTCGCGGGAACGCGAGGTGGGTGAGCTCGCGACACTCTTTCCCTTTTTTTTTT	52807.9
UDG_UG_f1AC_f2ATA	25952	47641	47641	0	CGCGAGCTCACUATACTCGCGGGAACGCGAGTATGGTGAGCTCGCGACACTCTTTCCCTTTTTTTTTT	48356.4
UDG_UG_f1AG_f2TTG	26031	47852	47852	0	CGCGAGCTCAGUTTGCTCGCGGGAACGCGAGCAAGCTGAGCTCGCGACACTCTTTCCCTTTTTTTTTT	48733.9
UDG_UG_f1CA_f2CTA	28375	51957	53290	0	CGCGAGCTCCAUCTACTCGCGGGAACGCGAGTAGGTGGAGCTCGCGACACTCTTTCCCTTTTTTTTTT	54272.2
UDG_UG_f1CC_f2CCT	28920	52881	54262	0	CGCGAGCTCCCUCCTCTCGCGGGAACGCGAGAGGGGGGAGCTCGCGACACTCTTTCCCTTTTTTTTTT	55266.7
UDG_UG_f1GA_f2CCT	30058	55394	56292	0	CGCGAGCTCGAUCCTCTCGCGGGAACGCGAGAGGGTCGAGCTCGCGACACTCTTTCCCTTTTTTTTTT	57334.3
UDG_UG_f1AT_f2AAG	23703	43454	43454	0	CGCGAGCTCATUAAGCTCGCGGGAACGCGAGCTTGATGAGCTCGCGACACTCTTTCCCTTTTTTTTTT	44062.9
UDG_UG_f1GC_f2AAC	27059	49303	49303	0	CGCGAGCTCGCUAACCTCGCGGGAACGCGAGGTTGGCGAGCTCGCGACACTCTTTCCCTTTTTTTTTT	50215.9
UDG_UG_f1CT_f2CGT	26259	48197	48197	0	CGCGAGCTCCTUCGTCTCGCGGGAACGCGAGACGGAGGAGCTCGCGACACTCTTTCCCTTTTTTTTTT	48920.8
UDG_UG_f1AC_f2ATA	25423	46265	46265	0	CGCGAGCTCACUATACTCGCGGGAACGCGAGTATGGTGAGCTCGCGACACTCTTTCCCTTTTTTTTTT	47017.3
UDG_UG_f1GT_f2CCC	29853	54410	55926	0	CGCGAGCTCGTUCCCCTCGCGGGAACGCGAGGGGGACGAGCTCGCGACACTCTTTCCCTTTTTTTTTT	57093.2
UDG_UG_f1AT_f2AGG	23586	43267	43267	0	CGCGAGCTCATUAGGCTCGCGGGAACGCGAGCCTGATGAGCTCGCGACACTCTTTCCCTTTTTTTTTT	44104.5
UDG_UG_f1AT_f2ATG	24869	45527	45527	0	CGCGAGCTCATUATGCTCGCGGGAACGCGAGCATGATGAGCTCGCGACACTCTTTCCCTTTTTTTTTT	46597.7
UDG_UG_f1AA_f2ATC	27658	50769	52012	0	CGCGAGCTCAAUATCCTCGCGGGAACGCGAGGATGTTGAGCTCGCGACACTCTTTCCCTTTTTTTTTT	53235.2
UDG_UG_f1CC_f2TAG	23437	42960	42960	0	CGCGAGCTCCCUTAGCTCGCGGGAACGCGAGCTAGGGGAGCTCGCGACACTCTTTCCCTTTTTTTTTT	43755.5
UDG_UG_f1TC_f2GGC	27397	50163	51546	0	CGCGAGCTCTCUGGCCTCGCGGGAACGCGAGGCCGGAGAGCTCGCGACACTCTTTCCCTTTTTTTTTT	52384.1
UDG_UG_f1AT_f2CGT	25699	47173	47173	0	CGCGAGCTCATUCGTCTCGCGGGAACGCGAGACGGATGAGCTCGCGACACTCTTTCCCTTTTTTTTTT	47680.4
UDG_UG_f1AA_f2TCT	26472	48431	48431	0	CGCGAGCTCAAUTCTCTCGCGGGAACGCGAGAGAGTTGAGCTCGCGACACTCTTTCCCTTTTTTTTTT	48850.4
UDG_UG_f1AC_f2CTG	26708	48941	48941	0	CGCGAGCTCACUCTGCTCGCGGGAACGCGAGCAGGGTGAGCTCGCGACACTCTTTCCCTTTTTTTTTT	49480.9
UDG_UG_f1CC_f2GCT	28076	51326	52757	0	CGCGAGCTCCCUGCTCTCGCGGGAACGCGAGAGCGGGGAGCTCGCGACACTCTTTCCCTTTTTTTTTT	53418.7
UDG_UG_f1CA_f2TTT	26663	48747	48747	0	CGCGAGCTCCAUTTTCTCGCGGGAACGCGAGAAAGTGGAGCTCGCGACACTCTTTCCCTTTTTTTTTT	49382.3
UDG_UG_f1CT_f2GGA	26463	48060	48060	0	CGCGAGCTCCTUGGACTCGCGGGAACGCGAGTCCGAGGAGCTCGCGACACTCTTTCCCTTTTTTTTTT	48612.7
UDG_UG_f1TT_f2GCC	25958	47744	47744	0	CGCGAGCTCTTUGCCCTCGCGGGAACGCGAGGGCGAAGAGCTCGCGACACTCTTTCCCTTTTTTTTTT	48358
UDG_UG_f1TA_f2ACC	26209	48186	48186	0	CGCGAGCTCTAUACCCTCGCGGGAACGCGAGGGTGTAGAGCTCGCGACACTCTTTCCCTTTTTTTTTT	48740.1
UDG_UG_f1AG_f2CCT	29881	54640	55976	0	CGCGAGCTCAGUCCTCTCGCGGGAACGCGAGAGGGCTGAGCTCGCGACACTCTTTCCCTTTTTTTTTT	56397
UDG_UG_f1TG_f2ATT	26032	47404	47404	0	CGCGAGCTCTGUATTCTCGCGGGAACGCGAGAATGCAGAGCTCGCGACACTCTTTCCCTTTTTTTTTT	47702.7
UDG_UG_f1TT_f2GAC	25421	46492	46492	0	CGCGAGCTCTTUGACCTCGCGGGAACGCGAGGTCGAAGAGCTCGCGACACTCTTTCCCTTTTTTTTTT	46729.2
UDG_UG_f1TG_f2ACT	26532	48494	48494	0	CGCGAGCTCTGUACTCTCGCGGGAACGCGAGAGTGCAGAGCTCGCGACACTCTTTCCCTTTTTTTTTT	48846.5
UDG_UG_f1TG_f2TAA	24846	45571	45571	0	CGCGAGCTCTGUTAACTCGCGGGAACGCGAGTTAGCAGAGCTCGCGACACTCTTTCCCTTTTTTTTTT	45902.2
UDG_UG_f1AT_f2CTG	25077	45785	45785	0	CGCGAGCTCATUCTGCTCGCGGGAACGCGAGCAGGATGAGCTCGCGACACTCTTTCCCTTTTTTTTTT	46181.5
UDG_UG_f1CG_f2AGG	26619	48800	48800	0	CGCGAGCTCCGUAGGCTCGCGGGAACGCGAGCCTGCGGAGCTCGCGACACTCTTTCCCTTTTTTTTTT	49384
UDG_UG_random_2U	31795	58144	59390	0	CGCGUCTACUCTTTATGCGCGGGAACGCGCATAAAGGGTAGGCGCGACACTCTTTCCCTTTTTTTTTT	60328.9
UDG_UG_f1AA_f2CGT	28864	52760	54162	0	CGCGAGCTCAAUCGTCTCGCGGGAACGCGAGACGGTTGAGCTCGCGACACTCTTTCCCTTTTTTTTTT	55458.1
UDG_UG_f1TG_f2TTC	27033	49421	49421	0	CGCGAGCTCTGUTTCCTCGCGGGAACGCGAGGAAGCAGAGCTCGCGACACTCTTTCCCTTTTTTTTTT	50893.7
UDG_UG_f1AA_f2TTG	28836	52681	54112	0	CGCGAGCTCAAUTTGCTCGCGGGAACGCGAGCAAGTTGAGCTCGCGACACTCTTTCCCTTTTTTTTTT	55884.6
UDG_UG_f1GC_f2TTT	25731	47097	47097	0	CGCGAGCTCGCUTTTCTCGCGGGAACGCGAGAAAGGCGAGCTCGCGACACTCTTTCCCTTTTTTTTTT	48639.8
UDG_UG_f1GG_f2TGC	30358	55113	56827	0	CGCGAGCTCGGUTGCCTCGCGGGAACGCGAGGCAGCCGAGCTCGCGACACTCTTTCCCTTTTTTTTTT	58688.5
UDG_UG_f1CA_f2ACT	25188	46016	46016	0	CGCGAGCTCCAUACTCTCGCGGGAACGCGAGAGTGTGGAGCTCGCGACACTCTTTCCCTTTTTTTTTT	47523.4
UDG_UG_f1TA_f2TAT	23545	43178	43178	0	CGCGAGCTCTAUTATCTCGCGGGAACGCGAGATAGTAGAGCTCGCGACACTCTTTCCCTTTTTTTTTT	44592.4
UDG_UG_f1AA_f2ACC	25361	46782	46782	0	CGCGAGCTCAAUACCCTCGCGGGAACGCGAGGGTGTTGAGCTCGCGACACTCTTTCCCTTTTTTTTTT	48314.5
UDG_UG_f1TG_f2AGG	21402	39239	39239	0	CGCGAGCTCTGUAGGCTCGCGGGAACGCGAGCCTGCAGAGCTCGCGACACTCTTTCCCTTTTTTTTTT	40524.4
UDG_UG_f1CC_f2TTG	24509	44914	44914	0	CGCGAGCTCCCUTTGCTCGCGGGAACGCGAGCAAGGGGAGCTCGCGACACTCTTTCCCTTTTTTTTTT	46636.3
UDG_UG_f1AT_f2TTC	23614	43471	43471	0	CGCGAGCTCATUTTCCTCGCGGGAACGCGAGGAAGATGAGCTCGCGACACTCTTTCCCTTTTTTTTTT	45138
UDG_UG_f1GA_f2TCC	27415	50131	51578	0	CGCGAGCTCGAUTCCCTCGCGGGAACGCGAGGGAGTCGAGCTCGCGACACTCTTTCCCTTTTTTTTTT	53555.9
UDG_UG_f1TG_f2TAA	24446	44538	44538	0	CGCGAGCTCTGUTAACTCGCGGGAACGCGAGTTAGCAGAGCTCGCGACACTCTTTCCCTTTTTTTTTT	46245.9
UDG_UG_f1AT_f2CTT	25415	46643	46643	0	CGCGAGCTCATUCTTCTCGCGGGAACGCGAGAAGGATGAGCTCGCGACACTCTTTCCCTTTTTTTTTT	48431.6
UDG_UG_f1GC_f2ATC	26691	49427	49427	0	CGCGAGCTCGCUATCCTCGCGGGAACGCGAGGATGGCGAGCTCGCGACACTCTTTCCCTTTTTTTTTT	51322.4
UDG_UG_f1GG_f2GGT	28755	52582	53968	0	CGCGAGCTCGGUGGTCTCGCGGGAACGCGAGACCGCCGAGCTCGCGACACTCTTTCCCTTTTTTTTTT	55933.8
UDG_UG_f1TT_f2TAA	22591	41787	41787	0	CGCGAGCTCTTUTAACTCGCGGGAACGCGAGTTAGAAGAGCTCGCGACACTCTTTCCCTTTTTTTTTT	43274.6
UDG_UG_f1AT_f2CAT	24412	44860	44860	0	CGCGAGCTCATUCATCTCGCGGGAACGCGAGATGGATGAGCTCGCGACACTCTTTCCCTTTTTTTTTT	46321.6
UDG_UG_f1CC_f2TCT	24048	44217	44217	0	CGCGAGCTCCCUTCTCTCGCGGGAACGCGAGAGAGGGGAGCTCGCGACACTCTTTCCCTTTTTTTTTT	45875
UDG_UG_f1CT_f2AAT	24149	44412	44412	0	CGCGAGCTCCTUAATCTCGCGGGAACGCGAGATTGAGGAGCTCGCGACACTCTTTCCCTTTTTTTTTT	46099.2
UDG_UG_f1AA_f2ATT	27343	49772	49772	0	CGCGAGCTCAAUATTCTCGCGGGAACGCGAGAATGTTGAGCTCGCGACACTCTTTCCCTTTTTTTTTT	51680.6
UDG_UG_f1CA_f2AAA	26778	49148	49148	0	CGCGAGCTCCAUAAACTCGCGGGAACGCGAGTTTGTGGAGCTCGCGACACTCTTTCCCTTTTTTTTTT	51015.1
UDG_UG_f1AT_f2GTC	26385	48762	48762	0	CGCGAGCTCATUGTCCTCGCGGGAACGCGAGGACGATGAGCTCGCGACACTCTTTCCCTTTTTTTTTT	50557.8
UDG_UG_random_4U	39370	65535	72899	0	CGCGCUCUGUUCTGTCCCGCGGGAACGCGGGACAGGGCGGGGCGCGACACTCTTTCCCTTTTTTTTTT	75583.6
UDG_UG_f1GA_f2CGT	28589	52364	53672	0	CGCGAGCTCGAUCGTCTCGCGGGAACGCGAGACGGTCGAGCTCGCGACACTCTTTCCCTTTTTTTTTT	55895.3
UDG_UG_f1AG_f2CCG	28536	52399	53577	0	CGCGAGCTCAGUCCGCTCGCGGGAACGCGAGCGGGCTGAGCTCGCGACACTCTTTCCCTTTTTTTTTT	55084
UDG_UG_f1CC_f2AAG	24843	45639	45639	0	CGCGAGCTCCCUAAGCTCGCGGGAACGCGAGCTTGGGGAGCTCGCGACACTCTTTCCCTTTTTTTTTT	46783.9
UDG_UG_f1AC_f2AAA	25644	46981	46981	0	CGCGAGCTCACUAAACTCGCGGGAACGCGAGTTTGGTGAGCTCGCGACACTCTTTCCCTTTTTTTTTT	48157.5
UDG_UG_f1CC_f2GGT	28293	51901	53144	0	CGCGAGCTCCCUGGTCTCGCGGGAACGCGAGACCGGGGAGCTCGCGACACTCTTTCCCTTTTTTTTTT	54270.4
UDG_UG_f1GC_f2CTG	28166	51596	52918	0	CGCGAGCTCGCUCTGCTCGCGGGAACGCGAGCAGGGCGAGCTCGCGACACTCTTTCCCTTTTTTTTTT	53961.8
UDG_UG_f1TG_f2AGG	25368	46979	46979	0	CGCGAGCTCTGUAGGCTCGCGGGAACGCGAGCCTGCAGAGCTCGCGACACTCTTTCCCTTTTTTTTTT	47974.7
UDG_UG_f1TA_f2GTC	28095	51536	52791	0	CGCGAGCTCTAUGTCCTCGCGGGAACGCGAGGACGTAGAGCTCGCGACACTCTTTCCCTTTTTTTTTT	53963.7
UDG_UG_f1GC_f2GAG	25600	47058	47058	0	CGCGAGCTCGCUGAGCTCGCGGGAACGCGAGCTCGGCGAGCTCGCGACACTCTTTCCCTTTTTTTTTT	48040.1
UDG_UG_f1GG_f2TTA	26033	48085	48085	0	CGCGAGCTCGGUTTACTCGCGGGAACGCGAGTAAGCCGAGCTCGCGACACTCTTTCCCTTTTTTTTTT	48977.4
UDG_UG_f1CT_f2AGT	24019	44169	44169	0	CGCGAGCTCCTUAGTCTCGCGGGAACGCGAGACTGAGGAGCTCGCGACACTCTTTCCCTTTTTTTTTT	44856.9
UDG_UG_f1TT_f2GTG	25346	46566	46566	0	CGCGAGCTCTTUGTGCTCGCGGGAACGCGAGCACGAAGAGCTCGCGACACTCTTTCCCTTTTTTTTTT	47256.3
UDG_UG_f1TG_f2CGC	30668	55958	57380	0	CGCGAGCTCTGUCGCCTCGCGGGAACGCGAGGCGGCAGAGCTCGCGACACTCTTTCCCTTTTTTTTTT	58219.6
UDG_UG_f1AT_f2AGA	23576	43342	43342	0	CGCGAGCTCATUAGACTCGCGGGAACGCGAGTCTGATGAGCTCGCGACACTCTTTCCCTTTTTTTTTT	44017
UDG_UG_f1CA_f2GGG	28676	52771	53827	0	CGCGAGCTCCAUGGGCTCGCGGGAACGCGAGCCCGTGGAGCTCGCGACACTCTTTCCCTTTTTTTTTT	54535.3
UDG_UG_f1CC_f2GGG	27476	50262	51687	0	CGCGAGCTCCCUGGGCTCGCGGGAACGCGAGCCCGGGGAGCTCGCGACACTCTTTCCCTTTTTTTTTT	52463.2
UDG_UG_f1CA_f2CCT	29196	53644	54754	0	CGCGAGCTCCAUCCTCTCGCGGGAACGCGAGAGGGTGGAGCTCGCGACACTCTTTCCCTTTTTTTTTT	55763.1
UDG_UG_f1CG_f2CCG	31215	57161	58355	0	CGCGAGCTCCGUCCGCTCGCGGGAACGCGAGCGGGCGGAGCTCGCGACACTCTTTCCCTTTTTTTTTT	59430.5
UDG_UG_f1AT_f2CTT	26434	48533	48533	0	CGCGAGCTCATUCTTCTCGCGGGAACGCGAGAAGGATGAGCTCGCGACACTCTTTCCCTTTTTTTTTT	49431.7
UDG_UG_f1AA_f2TTG	26875	49075	49075	0	CGCGAGCTCAAUTTGCTCGCGGGAACGCGAGCAAGTTGAGCTCGCGACACTCTTTCCCTTTTTTTTTT	49983.7
UDG_UG_f1AA_f2GAG	25751	46958	46958	0	CGCGAGCTCAAUGAGCTCGCGGGAACGCGAGCTCGTTGAGCTCGCGACACTCTTTCCCTTTTTTTTTT	47616
UDG_UG_f1TT_f2CAA	24666	45088	45088	0	CGCGAGCTCTTUCAACTCGCGGGAACGCGAGTTGGAAGAGCTCGCGACACTCTTTCCCTTTTTTTTTT	45922.9
UDG_UG_f1TC_f2CTA	25192	46391	46391	0	CGCGAGCTCTCUCTACTCGCGGGAACGCGAGTAGGGAGAGCTCGCGACACTCTTTCCCTTTTTTTTTT	47087.7
UDG_UG_f1AC_f2CGG	25535	46811	46811	0	CGCGAGCTCACUCGGCTCGCGGGAACGCGAGCCGGGTGAGCTCGCGACACTCTTTCCCTTTTTTTTTT	47572.1
UDG_UG_f1TG_f2ACG	25745	47282	47282	0	CGCGAGCTCTGUACGCTCGCGGGAACGCGAGCGTGCAGAGCTCGCGACACTCTTTCCCTTTTTTTTTT	48268.8
UDG_UG_f1AT_f2TCA	23331	42472	42472	0	CGCGAGCTCATUTCACTCGCGGGAACGCGAGTGAGATGAGCTCGCGACACTCTTTCCCTTTTTTTTTT	43294.1
UDG_UG_f1TA_f2AGT	26652	48803	48803	0	CGCGAGCTCTAUAGTCTCGCGGGAACGCGAGACTGTAGAGCTCGCGACACTCTTTCCCTTTTTTTTTT	49950.7
UDG_UG_f1TT_f2GAT	24215	44547	44547	0	CGCGAGCTCTTUGATCTCGCGGGAACGCGAGATCGAAGAGCTCGCGACACTCTTTCCCTTTTTTTTTT	45594.6
UDG_UG_f1AT_f2ATT	26015	47750	47750	0	CGCGAGCTCATUATTCTCGCGGGAACGCGAGAATGATGAGCTCGCGACACTCTTTCCCTTTTTTTTTT	48634.2
UDG_UG_f1AG_f2GTC	28540	52373	53585	0	CGCGAGCTCAGUGTCCTCGCGGGAACGCGAGGACGCTGAGCTCGCGACACTCTTTCCCTTTTTTTTTT	54456.3
UDG_UG_f1TC_f2TCA	23595	43481	43481	0	CGCGAGCTCTCUTCACTCGCGGGAACGCGAGTGAGGAGAGCTCGCGACACTCTTTCCCTTTTTTTTTT	43948.7
UDG_UG_f1TG_f2TTT	23831	43562	43562	0	CGCGAGCTCTGUTTTCTCGCGGGAACGCGAGAAAGCAGAGCTCGCGACACTCTTTCCCTTTTTTTTTT	43939.3
UDG_UG_f1CG_f2AAC	26625	48407	48407	0	CGCGAGCTCCGUAACCTCGCGGGAACGCGAGGTTGCGGAGCTCGCGACACTCTTTCCCTTTTTTTTTT	48941.1
UDG_UG_f1GG_f2AAT	26402	48659	48659	0	CGCGAGCTCGGUAATCTCGCGGGAACGCGAGATTGCCGAGCTCGCGACACTCTTTCCCTTTTTTTTTT	49269.3
UDG_UG_f1TA_f2GGA	27254	49863	49863	0	CGCGAGCTCTAUGGACTCGCGGGAACGCGAGTCCGTAGAGCTCGCGACACTCTTTCCCTTTTTTTTTT	50512.8
UDG_UG_f1AA_f2TGC	27914	51254	52468	0	CGCGAGCTCAAUTGCCTCGCGGGAACGCGAGGCAGTTGAGCTCGCGACACTCTTTCCCTTTTTTTTTT	53071.4
UDG_UG_f1CA_f2AAG	26054	47645	47645	0	CGCGAGCTCCAUAAGCTCGCGGGAACGCGAGCTTGTGGAGCTCGCGACACTCTTTCCCTTTTTTTTTT	48257.8
UDG_UG_f1CA_f2AAT	27643	50699	51985	0	CGCGAGCTCCAUAATCTCGCGGGAACGCGAGATTGTGGAGCTCGCGACACTCTTTCCCTTTTTTTTTT	52582.8
UDG_UG_f1CG_f2CCT	32532	59697	60704	0	CGCGAGCTCCGUCCTCTCGCGGGAACGCGAGAGGGCGGAGCTCGCGACACTCTTTCCCTTTTTTTTTT	61160.6
UDG_UG_f1TC_f2ACT	24992	45967	45967	0	CGCGAGCTCTCUACTCTCGCGGGAACGCGAGAGTGGAGAGCTCGCGACACTCTTTCCCTTTTTTTTTT	46256.6
UDG_UG_f1TA_f2TCC	25831	47408	47408	0	CGCGAGCTCTAUTCCCTCGCGGGAACGCGAGGGAGTAGAGCTCGCGACACTCTTTCCCTTTTTTTTTT	47649.9
UDG_UG_f1GC_f2AGC	27460	50413	51659	0	CGCGAGCTCGCUAGCCTCGCGGGAACGCGAGGCTGGCGAGCTCGCGACACTCTTTCCCTTTTTTTTTT	52034.5
UDG_UG_f1CG_f2AAG	24503	44517	44517	0	CGCGAGCTCCGUAAGCTCGCGGGAACGCGAGCTTGCGGAGCTCGCGACACTCTTTCCCTTTTTTTTTT	44840.6
UDG_UG_f1AA_f2GCG	27872	50867	52393	0	CGCGAGCTCAAUGCGCTCGCGGGAACGCGAGCGCGTTGAGCTCGCGACACTCTTTCCCTTTTTTTTTT	52846.8
UDG_UG_f1TT_f2CGC	28856	52744	54148	0	CGCGAGCTCTTUCGCCTCGCGGGAACGCGAGGCGGAAGAGCTCGCGACACTCTTTCCCTTTTTTTTTT	54796
UDG_UG_f1GA_f2GGT	31322	57119	58546	0	CGCGAGCTCGAUGGTCTCGCGGGAACGCGAGACCGTCGAGCTCGCGACACTCTTTCCCTTTTTTTTTT	59471.6
UDG_UG_f1AC_f2GCG	28195	51610	52969	0	CGCGAGCTCACUGCGCTCGCGGGAACGCGAGCGCGGTGAGCTCGCGACACTCTTTCCCTTTTTTTTTT	54236.6
UDG_UG_f1TC_f2CCA	26485	48577	48577	0	CGCGAGCTCTCUCCACTCGCGGGAACGCGAGTGGGGAGAGCTCGCGACACTCTTTCCCTTTTTTTTTT	50024.5
UDG_UG_f1CC_f2CAG	25654	47099	47099	0	CGCGAGCTCCCUCAGCTCGCGGGAACGCGAGCTGGGGGAGCTCGCGACACTCTTTCCCTTTTTTTTTT	48641.9
UDG_UG_f1CA_f2CCT	30865	56319	57731	0	CGCGAGCTCCAUCCTCTCGCGGGAACGCGAGAGGGTGGAGCTCGCGACACTCTTTCCCTTTTTTTTTT	59622.1
UDG_UG_f1CT_f2GAC	26344	48483	48483	0	CGCGAGCTCCTUGACCTCGCGGGAACGCGAGGTCGAGGAGCTCGCGACACTCTTTCCCTTTTTTTTTT	50071.2
UDG_UG_f1CT_f2GCG	26158	48045	48045	0	CGCGAGCTCCTUGCGCTCGCGGGAACGCGAGCGCGAGGAGCTCGCGACACTCTTTCCCTTTTTTTTTT	49618.9
UDG_UG_f1TT_f2TTT	22893	41947	41947	0	CGCGAGCTCTTUTTTCTCGCGGGAACGCGAGAAAGAAGAGCTCGCGACACTCTTTCCCTTTTTTTTTT	43321.1
UDG_UG_f1TC_f2GTC	25393	46336	46336	0	CGCGAGCTCTCUGTCCTCGCGGGAACGCGAGGACGGAGAGCTCGCGACACTCTTTCCCTTTTTTTTTT	47853.9
UDG_UG_f1CG_f2CAG	25173	46125	46125	0	CGCGAGCTCCGUCAGCTCGCGGGAACGCGAGCTGGCGGAGCTCGCGACACTCTTTCCCTTTTTTTTTT	47636
UDG_UG_f1AC_f2TGA	22639	41610	41610	0	CGCGAGCTCACUTGACTCGCGGGAACGCGAGTCAGGTGAGCTCGCGACACTCTTTCCCTTTTTTTTTT	43205.6
UDG_UG_f1AC_f2AGC	25933	47112	47112	0	CGCGAGCTCACUAGCCTCGCGGGAACGCGAGGCTGGTGAGCTCGCGACACTCTTTCCCTTTTTTTTTT	48918.6
UDG_UG_f1AT_f2ATT	25610	47077	47077	0	CGCGAGCTCATUATTCTCGCGGGAACGCGAGAATGATGAGCTCGCGACACTCTTTCCCTTTTTTTTTT	48882.3
UDG_UG_f1GC_f2TTC	25151	45864	45864	0	CGCGAGCTCGCUTTCCTCGCGGGAACGCGAGGAAGGCGAGCTCGCGACACTCTTTCCCTTTTTTTTTT	47622.8
UDG_UG_f1TT_f2GAG	23217	42484	42484	0	CGCGAGCTCTTUGAGCTCGCGGGAACGCGAGCTCGAAGAGCTCGCGACACTCTTTCCCTTTTTTTTTT	44113.1
UDG_UG_f1CT_f2CGC	27820	50942	52301	0	CGCGAGCTCCTUCGCCTCGCGGGAACGCGAGGCGGAGGAGCTCGCGACACTCTTTCCCTTTTTTTTTT	54306.6
UDG_UG_f1AG_f2GTG	27476	50477	51687	0	CGCGAGCTCAGUGTGCTCGCGGGAACGCGAGCACGCTGAGCTCGCGACACTCTTTCCCTTTTTTTTTT	53569.7
UDG_UG_f1TA_f2TGA	23853	43671	43671	0	CGCGAGCTCTAUTGACTCGCGGGAACGCGAGTCAGTAGAGCTCGCGACACTCTTTCCCTTTTTTTTTT	45225.7
UDG_UG_f1AC_f2TAT	23391	42618	42618	0	CGCGAGCTCACUTATCTCGCGGGAACGCGAGATAGGTGAGCTCGCGACACTCTTTCCCTTTTTTTTTT	44006.5
UDG_UG_f1AT_f2ACG	23605	43589	43589	0	CGCGAGCTCATUACGCTCGCGGGAACGCGAGCGTGATGAGCTCGCGACACTCTTTCCCTTTTTTTTTT	45223.5
UDG_MM_GA	8301	15264	15264	0	CGCGAGCTCACGCTTACCGCGGGAACGCGGTAAGAGTGAGCTCGCGACACTCTTTCCCTTTTTTTTTT	15843.9
UDG_UG_f1AT_f2TCA	22196	40744	40744	0	CGCGAGCTCATUTCACTCGCGGGAACGCGAGTGAGATGAGCTCGCGACACTCTTTCCCTTTTTTTTTT	42306.4
UDG_UG_f1TA_f2TCC	24877	45586	45586	0	CGCGAGCTCTAUTCCCTCGCGGGAACGCGAGGGAGTAGAGCTCGCGACACTCTTTCCCTTTTTTTTTT	47317.8
UDG_UG_f1GA_f2GCA	28723	52749	53911	0	CGCGAGCTCGAUGCACTCGCGGGAACGCGAGTGCGTCGAGCTCGCGACACTCTTTCCCTTTTTTTTTT	55896.4
UDG_UG_f1AC_f2ACT	24403	45042	45042	0	CGCGAGCTCACUACTCTCGCGGGAACGCGAGAGTGGTGAGCTCGCGACACTCTTTCCCTTTTTTTTTT	46700.8
UDG_UG_f1TG_f2CCC	30419	55826	56936	0	CGCGAGCTCTGUCCCCTCGCGGGAACGCGAGGGGGCAGAGCTCGCGACACTCTTTCCCTTTTTTTTTT	59294.5
UDG_UG_f1AT_f2TAC	23316	42577	42577	0	CGCGAGCTCATUTACCTCGCGGGAACGCGAGGTAGATGAGCTCGCGACACTCTTTCCCTTTTTTTTTT	43774.6
UDG_UG_f1GT_f2TGA	22339	40793	40793	0	CGCGAGCTCGTUTGACTCGCGGGAACGCGAGTCAGACGAGCTCGCGACACTCTTTCCCTTTTTTTTTT	41816.3
UDG_UG_f1CC_f2AAG	24611	45264	45264	0	CGCGAGCTCCCUAAGCTCGCGGGAACGCGAGCTTGGGGAGCTCGCGACACTCTTTCCCTTTTTTTTTT	46397.5
UDG_UG_f1TC_f2CTC	25890	47528	47528	0	CGCGAGCTCTCUCTCCTCGCGGGAACGCGAGGAGGGAGAGCTCGCGACACTCTTTCCCTTTTTTTTTT	48535.3
UDG_UG_f1CG_f2CGT	29929	54949	56062	0	CGCGAGCTCCGUCGTCTCGCGGGAACGCGAGACGGCGGAGCTCGCGACACTCTTTCCCTTTTTTTTTT	57167.8
UDG_UG_f1GT_f2GGT	27565	50908	51846	0	CGCGAGCTCGTUGGTCTCGCGGGAACGCGAGACCGACGAGCTCGCGACACTCTTTCCCTTTTTTTTTT	52944.9
UDG_UG_f1CA_f2GAC	28388	52025	53314	0	CGCGAGCTCCAUGACCTCGCGGGAACGCGAGGTCGTGGAGCTCGCGACACTCTTTCCCTTTTTTTTTT	54498.3
UDG_UG_f1GA_f2ATT	28137	51522	52866	0	CGCGAGCTCGAUATTCTCGCGGGAACGCGAGAATGTCGAGCTCGCGACACTCTTTCCCTTTTTTTTTT	53969.3
UDG_UG_f1GA_f2CAC	29534	54580	55357	0	CGCGAGCTCGAUCACCTCGCGGGAACGCGAGGTGGTCGAGCTCGCGACACTCTTTCCCTTTTTTTTTT	56384.4
UDG_UG_f1GA_f2AGT	26804	49422	49422	0	CGCGAGCTCGAUAGTCTCGCGGGAACGCGAGACTGTCGAGCTCGCGACACTCTTTCCCTTTTTTTTTT	50191.7
UDG_UG_f1TC_f2GTA	26389	48507	48507	0	CGCGAGCTCTCUGTACTCGCGGGAACGCGAGTACGGAGAGCTCGCGACACTCTTTCCCTTTTTTTTTT	49226.1
UDG_UG_f1TC_f2ACA	24591	44942	44942	0	CGCGAGCTCTCUACACTCGCGGGAACGCGAGTGTGGAGAGCTCGCGACACTCTTTCCCTTTTTTTTTT	45599.6
UDG_UG_f1TC_f2AGG	24099	43972	43972	0	CGCGAGCTCTCUAGGCTCGCGGGAACGCGAGCCTGGAGAGCTCGCGACACTCTTTCCCTTTTTTTTTT	44656.8
UDG_UG_f1TC_f2TCG	23475	43146	43146	0	CGCGAGCTCTCUTCGCTCGCGGGAACGCGAGCGAGGAGAGCTCGCGACACTCTTTCCCTTTTTTTTTT	43713.8
UDG_UG_f1AT_f2TCA	23145	42439	42439	0	CGCGAGCTCATUTCACTCGCGGGAACGCGAGTGAGATGAGCTCGCGACACTCTTTCCCTTTTTTTTTT	43076.3
UDG_UG_f1TT_f2AGC	23996	44102	44102	0	CGCGAGCTCTTUAGCCTCGCGGGAACGCGAGGCTGAAGAGCTCGCGACACTCTTTCCCTTTTTTTTTT	44914.8
UDG_UG_f1GC_f2ATA	27125	49922	49922	0	CGCGAGCTCGCUATACTCGCGGGAACGCGAGTATGGCGAGCTCGCGACACTCTTTCCCTTTTTTTTTT	50842.1
UDG_UG_f1TG_f2TAT	24971	45797	45797	0	CGCGAGCTCTGUTATCTCGCGGGAACGCGAGATAGCAGAGCTCGCGACACTCTTTCCCTTTTTTTTTT	46645
UDG_UG_f1GA_f2AGG	26664	48997	48997	0	CGCGAGCTCGAUAGGCTCGCGGGAACGCGAGCCTGTCGAGCTCGCGACACTCTTTCCCTTTTTTTTTT	49904.3
UDG_UG_f1TT_f2CCG	25314	46420	46420	0	CGCGAGCTCTTUCCGCTCGCGGGAACGCGAGCGGGAAGAGCTCGCGACACTCTTTCCCTTTTTTTTTT	47070.5
UDG_UG_f1TG_f2GGC	29366	53640	55058	0	CGCGAGCTCTGUGGCCTCGCGGGAACGCGAGGCCGCAGAGCTCGCGACACTCTTTCCCTTTTTTTTTT	56077.5
UDG_UG_f1AA_f2CGC	30701	56273	57438	0	CGCGAGCTCAAUCGCCTCGCGGGAACGCGAGGCGGTTGAGCTCGCGACACTCTTTCCCTTTTTTTTTT	58300.6
UDG_UG_f1AA_f2CAG	26117	48032	48032	0	CGCGAGCTCAAUCAGCTCGCGGGAACGCGAGCTGGTTGAGCTCGCGACACTCTTTCCCTTTTTTTTTT	48813
UDG_UG_f1CA_f2TAT	26389	48412	48412	0	CGCGAGCTCCAUTATCTCGCGGGAACGCGAGATAGTGGAGCTCGCGACACTCTTTCCCTTTTTTTTTT	49422.4
UDG_UG_f1TT_f2CGC	27429	50375	51603	0	CGCGAGCTCTTUCGCCTCGCGGGAACGCGAGGCGGAAGAGCTCGCGACACTCTTTCCCTTTTTTTTTT	52601.9
UDG_UG_f1CT_f2TAT	24214	44439	44439	0	CGCGAGCTCCTUTATCTCGCGGGAACGCGAGATAGAGGAGCTCGCGACACTCTTTCCCTTTTTTTTTT	45484.1
UDG_UG_f1AA_f2GAC	28815	52998	54075	0	CGCGAGCTCAAUGACCTCGCGGGAACGCGAGGTCGTTGAGCTCGCGACACTCTTTCCCTTTTTTTTTT	55346.7
UDG_UG_f1TG_f2ATA	25241	46464	46464	0	CGCGAGCTCTGUATACTCGCGGGAACGCGAGTATGCAGAGCTCGCGACACTCTTTCCCTTTTTTTTTT	47324.4
UDG_UG_f1AT_f2GAC	25982	47387	47387	0	CGCGAGCTCATUGACCTCGCGGGAACGCGAGGTCGATGAGCTCGCGACACTCTTTCCCTTTTTTTTTT	48157.5
UDG_UG_f1AC_f2ACA	26841	48999	48999	0	CGCGAGCTCACUACACTCGCGGGAACGCGAGTGTGGTGAGCTCGCGACACTCTTTCCCTTTTTTTTTT	49526.1
UDG_UG_f1CA_f2GGA	28430	52240	53388	0	CGCGAGCTCCAUGGACTCGCGGGAACGCGAGTCCGTGGAGCTCGCGACACTCTTTCCCTTTTTTTTTT	53850.4
UDG_UG_f1CA_f2TGG	24970	45721	45721	0	CGCGAGCTCCAUTGGCTCGCGGGAACGCGAGCCAGTGGAGCTCGCGACACTCTTTCCCTTTTTTTTTT	46225.4
UDG_UG_f1AG_f2GAA	26655	48538	48538	0	CGCGAGCTCAGUGAACTCGCGGGAACGCGAGTTCGCTGAGCTCGCGACACTCTTTCCCTTTTTTTTTT	49146.8
UDG_UG_f1GA_f2ATG	28462	52037	53445	0	CGCGAGCTCGAUATGCTCGCGGGAACGCGAGCATGTCGAGCTCGCGACACTCTTTCCCTTTTTTTTTT	54141.5
UDG_UG_f1AG_f2CTC	30139	55260	56436	0	CGCGAGCTCAGUCTCCTCGCGGGAACGCGAGGAGGCTGAGCTCGCGACACTCTTTCCCTTTTTTTTTT	57085
UDG_MM_GA	7907	14612	14612	0	CGCGAGCTCACGCTTACCGCGGGAACGCGGTAAGAGTGAGCTCGCGACACTCTTTCCCTTTTTTTTTT	14799.9
UDG_UG_f1TA_f2AGT	27104	49230	49230	0	CGCGAGCTCTAUAGTCTCGCGGGAACGCGAGACTGTAGAGCTCGCGACACTCTTTCCCTTTTTTTTTT	49796.1
UDG_UG_f1TC_f2TTT	24293	44613	44613	0	CGCGAGCTCTCUTTTCTCGCGGGAACGCGAGAAAGGAGAGCTCGCGACACTCTTTCCCTTTTTTTTTT	44948.5
UDG_UG_f1AC_f2TGT	24093	44028	44028	0	CGCGAGCTCACUTGTCTCGCGGGAACGCGAGACAGGTGAGCTCGCGACACTCTTTCCCTTTTTTTTTT	44305.4
UDG_UG_f1AT_f2GCA	25822	47512	47512	0	CGCGAGCTCATUGCACTCGCGGGAACGCGAGTGCGATGAGCTCGCGACACTCTTTCCCTTTTTTTTTT	47754.5
UDG_UG_f1GG_f2GGG	29156	53090	54683	0	CGCGAGCTCGGUGGGCTCGCGGGAACGCGAGCCCGCCGAGCTCGCGACACTCTTTCCCTTTTTTTTTT	55080.5
UDG_UG_f1GG_f2GGC	30001	54811	56190	0	CGCGAGCTCGGUGGCCTCGCGGGAACGCGAGGCCGCCGAGCTCGCGACACTCTTTCCCTTTTTTTTTT	56598.4
UDG_UG_f1CT_f2ACG	24386	44675	44675	0	CGCGAGCTCCTUACGCTCGCGGGAACGCGAGCGTGAGGAGCTCGCGACACTCTTTCCCTTTTTTTTTT	45061.9
UDG_UG_f1AA_f2CCC	31019	56833	58006	0	CGCGAGCTCAAUCCCCTCGCGGGAACGCGAGGGGGTTGAGCTCGCGACACTCTTTCCCTTTTTTTTTT	58700.2
UDG_UG_f1AC_f2GCG	29182	52878	54730	0	CGCGAGCTCACUGCGCTCGCGGGAACGCGAGCGCGGTGAGCTCGCGACACTCTTTCCCTTTTTTTTTT	55595.3
UDG_UG_f1TT_f2CCC	26533	48729	48729	0	CGCGAGCTCTTUCCCCTCGCGGGAACGCGAGGGGGAAGAGCTCGCGACACTCTTTCCCTTTTTTTTTT	49895.1
UDG_UG_f1TA_f2GTA	28522	52154	53552	0	CGCGAGCTCTAUGTACTCGCGGGAACGCGAGTACGTAGAGCTCGCGACACTCTTTCCCTTTTTTTTTT	55147.8
UDG_UG_f1GC_f2CCT	29528	53923	55347	0	CGCGAGCTCGCUCCTCTCGCGGGAACGCGAGAGGGGCGAGCTCGCGACACTCTTTCCCTTTTTTTTTT	57160.1
UDG_UG_f1AC_f2CTT	26501	48557	48557	0	CGCGAGCTCACUCTTCTCGCGGGAACGCGAGAAGGGTGAGCTCGCGACACTCTTTCCCTTTTTTTTTT	50147.6
UDG_UG_f1TA_f2TAA	26025	47724	47724	0	CGCGAGCTCTAUTAACTCGCGGGAACGCGAGTTAGTAGAGCTCGCGACACTCTTTCCCTTTTTTTTTT	49287.3
UDG_UG_f1TA_f2CAG	22636	41282	41282	0	CGCGAGCTCTAUCAGCTCGCGGGAACGCGAGCTGGTAGAGCTCGCGACACTCTTTCCCTTTTTTTTTT	42634.3
UDG_UG_f1AT_f2CAG	21797	39872	39872	0	CGCGAGCTCATUCAGCTCGCGGGAACGCGAGCTGGATGAGCTCGCGACACTCTTTCCCTTTTTTTTTT	41178.1
UDG_UG_f1GG_f2ATC	26510	48677	48677	0	CGCGAGCTCGGUATCCTCGCGGGAACGCGAGGATGCCGAGCTCGCGACACTCTTTCCCTTTTTTTTTT	50271.6
UDG_UG_f1CC_f2GCG	26702	48732	48732	0	CGCGAGCTCCCUGCGCTCGCGGGAACGCGAGCGCGGGGAGCTCGCGACACTCTTTCCCTTTTTTTTTT	50328.4
UDG_UG_f1TA_f2CGG	24423	44808	44808	0	CGCGAGCTCTAUCGGCTCGCGGGAACGCGAGCCGGTAGAGCTCGCGACACTCTTTCCCTTTTTTTTTT	46526.3
UDG_UG_f1GT_f2ACC	25151	45977	45977	0	CGCGAGCTCGTUACCCTCGCGGGAACGCGAGGGTGACGAGCTCGCGACACTCTTTCCCTTTTTTTTTT	47740.1
UDG_UG_f1TG_f2CAG	25333	45992	45992	0	CGCGAGCTCTGUCAGCTCGCGGGAACGCGAGCTGGCAGAGCTCGCGACACTCTTTCCCTTTTTTTTTT	47755.7
UDG_UG_f1GG_f2GAC	27668	50605	52029	0	CGCGAGCTCGGUGACCTCGCGGGAACGCGAGGTCGCCGAGCTCGCGACACTCTTTCCCTTTTTTTTTT	54024.2
UDG_UG_f1AA_f2CAG	25695	47138	47138	0	CGCGAGCTCAAUCAGCTCGCGGGAACGCGAGCTGGTTGAGCTCGCGACACTCTTTCCCTTTTTTTTTT	48945.6
UDG_UG_f1CC_f2CGG	26779	49153	49153	0	CGCGAGCTCCCUCGGCTCGCGGGAACGCGAGCCGGGGGAGCTCGCGACACTCTTTCCCTTTTTTTTTT	51037.9
UDG_UG_f1GT_f2TGT	23022	42344	42344	0	CGCGAGCTCGTUTGTCTCGCGGGAACGCGAGACAGACGAGCTCGCGACACTCTTTCCCTTTTTTTTTT	43886.4
UDG_UG_f1CA_f2GAA	26164	47627	47627	0	CGCGAGCTCCAUGAACTCGCGGGAACGCGAGTTCGTGGAGCTCGCGACACTCTTTCCCTTTTTTTTTT	49322.6
UDG_UG_f1TT_f2ATT	24424	44873	44873	0	CGCGAGCTCTTUATTCTCGCGGGAACGCGAGAATGAAGAGCTCGCGACACTCTTTCCCTTTTTTTTTT	46335
UDG_UG_f1CG_f2GCT	27124	49271	49271	0	CGCGAGCTCCGUGCTCTCGCGGGAACGCGAGAGCGCGGAGCTCGCGACACTCTTTCCCTTTTTTTTTT	51118.5
UDG_UG_f1TA_f2GTG	25837	47336	47336	0	CGCGAGCTCTAUGTGCTCGCGGGAACGCGAGCACGTAGAGCTCGCGACACTCTTTCCCTTTTTTTTTT	49134.2
UDG_UG_f1GT_f2TGG	21335	38997	38997	0	CGCGAGCTCGTUTGGCTCGCGGGAACGCGAGCCAGACGAGCTCGCGACACTCTTTCCCTTTTTTTTTT	40492.4
UDG_UG_f1AG_f2TGG	23599	43213	43213	0	CGCGAGCTCAGUTGGCTCGCGGGAACGCGAGCCAGCTGAGCTCGCGACACTCTTTCCCTTTTTTTTTT	44854.6
UDG_UG_f1CG_f2TAT	23964	44107	44107	0	CGCGAGCTCCGUTATCTCGCGGGAACGCGAGATAGCGGAGCTCGCGACACTCTTTCCCTTTTTTTTTT	45731.3
UDG_UG_f1TT_f2CCA	24442	44855	44855	0	CGCGAGCTCTTUCCACTCGCGGGAACGCGAGTGGGAAGAGCTCGCGACACTCTTTCCCTTTTTTTTTT	46506.9
UDG_UG_f1TG_f2GGC	28556	51992	53613	0	CGCGAGCTCTGUGGCCTCGCGGGAACGCGAGGCCGCAGAGCTCGCGACACTCTTTCCCTTTTTTTTTT	55833.8
UDG_UG_f1CT_f2GAG	23639	43381	43381	0	CGCGAGCTCCTUGAGCTCGCGGGAACGCGAGCTCGAGGAGCTCGCGACACTCTTTCCCTTTTTTTTTT	44601.2
UDG_UG_f1CA_f2ATG	26767	49188	49188	0	CGCGAGCTCCAUATGCTCGCGGGAACGCGAGCATGTGGAGCTCGCGACACTCTTTCCCTTTTTTTTTT	50421.9
UDG_UG_f1TT_f2CTT	24784	45714	45714	0	CGCGAGCTCTTUCTTCTCGCGGGAACGCGAGAAGGAAGAGCTCGCGACACTCTTTCCCTTTTTTTTTT	46858.8
UDG_UG_f1TG_f2CAT	26684	49186	49186	0	CGCGAGCTCTGUCATCTCGCGGGAACGCGAGATGGCAGAGCTCGCGACACTCTTTCCCTTTTTTTTTT	50228.5
UDG_UG_f1GG_f2GCT	28560	52961	53620	0	CGCGAGCTCGGUGCTCTCGCGGGAACGCGAGAGCGCCGAGCTCGCGACACTCTTTCCCTTTTTTTTTT	54677.6
UDG_UG_f1GC_f2TCA	24816	45531	45531	0	CGCGAGCTCGCUTCACTCGCGGGAACGCGAGTGAGGCGAGCTCGCGACACTCTTTCCCTTTTTTTTTT	46496
UDG_UG_f1GG_f2AAA	26245	48260	48260	0	CGCGAGCTCGGUAAACTCGCGGGAACGCGAGTTTGCCGAGCTCGCGACACTCTTTCCCTTTTTTTTTT	49332
UDG_UG_f1TT_f2GTA	26342	48289	48289	0	CGCGAGCTCTTUGTACTCGCGGGAACGCGAGTACGAAGAGCTCGCGACACTCTTTCCCTTTTTTTTTT	49296.8
UDG_UG_f1TC_f2ACC	24718	45609	45609	0	CGCGAGCTCTCUACCCTCGCGGGAACGCGAGGGTGGAGAGCTCGCGACACTCTTTCCCTTTTTTTTTT	46455.5
UDG_UG_f1TA_f2CTG	24614	45149	45149	0	CGCGAGCTCTAUCTGCTCGCGGGAACGCGAGCAGGTAGAGCTCGCGACACTCTTTCCCTTTTTTTTTT	45852.1
UDG_UG_f1TA_f2CTA	26051	47754	47754	0	CGCGAGCTCTAUCTACTCGCGGGAACGCGAGTAGGTAGAGCTCGCGACACTCTTTCCCTTTTTTTTTT	48461.9
UDG_UG_f1CA_f2GGA	27604	50802	51915	0	CGCGAGCTCCAUGGACTCGCGGGAACGCGAGTCCGTGGAGCTCGCGACACTCTTTCCCTTTTTTTTTT	52674.6
UDG_UG_f1CA_f2TCC	26294	48178	48178	0	CGCGAGCTCCAUTCCCTCGCGGGAACGCGAGGGAGTGGAGCTCGCGACACTCTTTCCCTTTTTTTTTT	48928.3
UDG_UG_f1GA_f2CTC	31598	57953	59038	0	CGCGAGCTCGAUCTCCTCGCGGGAACGCGAGGAGGTCGAGCTCGCGACACTCTTTCCCTTTTTTTTTT	59814.9
UDG_UG_f1GT_f2GGG	26621	48643	48643	0	CGCGAGCTCGTUGGGCTCGCGGGAACGCGAGCCCGACGAGCTCGCGACACTCTTTCCCTTTTTTTTTT	49373.5
UDG_MM_GA	8168	14951	14951	0	CGCGAGCTCACGCTTACCGCGGGAACGCGGTAAGAGTGAGCTCGCGACACTCTTTCCCTTTTTTTTTT	15226.6
UDG_UG_f1TC_f2CTG	25241	46415	46415	0	CGCGAGCTCTCUCTGCTCGCGGGAACGCGAGCAGGGAGAGCTCGCGACACTCTTTCCCTTTTTTTTTT	47270.4
UDG_UG_f1CT_f2GTT	27243	49936	49936	0	CGCGAGCTCCTUGTTCTCGCGGGAACGCGAGAACGAGGAGCTCGCGACACTCTTTCCCTTTTTTTTTT	50860.6
UDG_UG_f1CA_f2CTC	28793	52708	54036	0	CGCGAGCTCCAUCTCCTCGCGGGAACGCGAGGAGGTGGAGCTCGCGACACTCTTTCCCTTTTTTTTTT	55036.6
UDG_UG_f1TG_f2GAG	21715	39759	39759	0	CGCGAGCTCTGUGAGCTCGCGGGAACGCGAGCTCGCAGAGCTCGCGACACTCTTTCCCTTTTTTTTTT	40316.1
UDG_UG_f1CA_f2TAC	26249	48295	48295	0	CGCGAGCTCCAUTACCTCGCGGGAACGCGAGGTAGTGGAGCTCGCGACACTCTTTCCCTTTTTTTTTT	49189.3
UDG_UG_f1GC_f2GGA	28580	51910	53656	0	CGCGAGCTCGCUGGACTCGCGGGAACGCGAGTCCGGCGAGCTCGCGACACTCTTTCCCTTTTTTTTTT	54461.8
UDG_UG_f1GG_f2GAG	23661	43411	43411	0	CGCGAGCTCGGUGAGCTCGCGGGAACGCGAGCTCGCCGAGCTCGCGACACTCTTTCCCTTTTTTTTTT	44116.9
UDG_UG_f1AA_f2TGG	24936	45815	45815	0	CGCGAGCTCAAUTGGCTCGCGGGAACGCGAGCCAGTTGAGCTCGCGACACTCTTTCCCTTTTTTTTTT	46771.2
UDG_UG_f1AA_f2GAA	28058	51227	52725	0	CGCGAGCTCAAUGAACTCGCGGGAACGCGAGTTCGTTGAGCTCGCGACACTCTTTCCCTTTTTTTTTT	53745.6
UDG_UG_f1CT_f2TAA	23644	43394	43394	0	CGCGAGCTCCTUTAACTCGCGGGAACGCGAGTTAGAGGAGCTCGCGACACTCTTTCCCTTTTTTTTTT	44414.5
UDG_UG_f1GT_f2GCA	25808	48415	48415	0	CGCGAGCTCGTUGCACTCGCGGGAACGCGAGTGCGACGAGCTCGCGACACTCTTTCCCTTTTTTTTTT	49553.6
UDG_MM_CT	8227	14965	14965	0	CGCGAGCTCACCCTTACCGCGGGAACGCGGTAAGTGTGAGCTCGCGACACTCTTTCCCTTTTTTTTTT	15242.1
UDG_UG_f1CT_f2AAA	24846	45690	45690	0	CGCGAGCTCCTUAAACTCGCGGGAACGCGAGTTTGAGGAGCTCGCGACACTCTTTCCCTTTTTTTTTT	46432.9
UDG_UG_f1AA_f2TGT	27322	50067	51412	0	CGCGAGCTCAAUTGTCTCGCGGGAACGCGAGACAGTTGAGCTCGCGACACTCTTTCCCTTTTTTTTTT	51965
UDG_UG_f1CG_f2GCG	30402	56000	56905	0	CGCGAGCTCCGUGCGCTCGCGGGAACGCGAGCGCGCGGAGCTCGCGACACTCTTTCCCTTTTTTTTTT	57397.8
UDG_UG_f1AT_f2TCG	23150	42098	42098	0	CGCGAGCTCATUTCGCTCGCGGGAACGCGAGCGAGATGAGCTCGCGACACTCTTTCCCTTTTTTTTTT	42562.4
UDG_UG_f1TA_f2AAT	27470	50377	51676	0	CGCGAGCTCTAUAATCTCGCGGGAACGCGAGATTGTAGAGCTCGCGACACTCTTTCCCTTTTTTTTTT	52324.1
UDG_UG_f1GT_f2ACC	26254	47856	47856	0	CGCGAGCTCGTUACCCTCGCGGGAACGCGAGGGTGACGAGCTCGCGACACTCTTTCCCTTTTTTTTTT	48479.6
UDG_UG_f1TG_f2TTG	25397	46670	46670	0	CGCGAGCTCTGUTTGCTCGCGGGAACGCGAGCAAGCAGAGCTCGCGACACTCTTTCCCTTTTTTTTTT	47206.7
UDG_UG_f1AG_f2AAT	25635	46894	46894	0	CGCGAGCTCAGUAATCTCGCGGGAACGCGAGATTGCTGAGCTCGCGACACTCTTTCCCTTTTTTTTTT	47497.1
UDG_UG_f1CC_f2GTG	28235	51668	53041	0	CGCGAGCTCCCUGTGCTCGCGGGAACGCGAGCACGGGGAGCTCGCGACACTCTTTCCCTTTTTTTTTT	53651
UDG_UG_f1AA_f2TAG	25404	46375	46375	0	CGCGAGCTCAAUTAGCTCGCGGGAACGCGAGCTAGTTGAGCTCGCGACACTCTTTCCCTTTTTTTTTT	46723.8
UDG_UG_f1TA_f2TAG	24366	44522	44522	0	CGCGAGCTCTAUTAGCTCGCGGGAACGCGAGCTAGTAGAGCTCGCGACACTCTTTCCCTTTTTTTTTT	44802.5
UDG_UG_f1CT_f2CAT	25996	47588	47588	0	CGCGAGCTCCTUCATCTCGCGGGAACGCGAGATGGAGGAGCTCGCGACACTCTTTCCCTTTTTTTTTT	47830.8
UDG_UG_f1TA_f2CTA	29319	53974	54974	0	CGCGAGCTCTAUCTACTCGCGGGAACGCGAGTAGGTAGAGCTCGCGACACTCTTTCCCTTTTTTTTTT	55373.6
UDG_UG_f1TA_f2GGC	28804	52744	54055	0	CGCGAGCTCTAUGGCCTCGCGGGAACGCGAGGCCGTAGAGCTCGCGACACTCTTTCCCTTTTTTTTTT	54447.9
UDG_UG_f1CA_f2GGC	29634	54311	55536	0	CGCGAGCTCCAUGGCCTCGCGGGAACGCGAGGCCGTGGAGCTCGCGACACTCTTTCCCTTTTTTTTTT	56017
UDG_UG_f1TC_f2GCT	25814	46875	46875	0	CGCGAGCTCTCUGCTCTCGCGGGAACGCGAGAGCGGAGAGCTCGCGACACTCTTTCCCTTTTTTTTTT	47436
UDG_UG_f1CG_f2TAC	25677	47110	47110	0	CGCGAGCTCCGUTACCTCGCGGGAACGCGAGGTAGCGGAGCTCGCGACACTCTTTCCCTTTTTTTTTT	47854.8
UDG_UG_f1CA_f2TAA	26346	48144	48144	0	CGCGAGCTCCAUTAACTCGCGGGAACGCGAGTTAGTGGAGCTCGCGACACTCTTTCCCTTTTTTTTTT	49296.1
UDG_UG_f1TT_f2GTT	26098	47801	47801	0	CGCGAGCTCTTUGTTCTCGCGGGAACGCGAGAACGAAGAGCTCGCGACACTCTTTCCCTTTTTTTTTT	49225.4
UDG_UG_f1TC_f2GTC	27139	49894	49894	0	CGCGAGCTCTCUGTCCTCGCGGGAACGCGAGGACGGAGAGCTCGCGACACTCTTTCCCTTTTTTTTTT	51528.4
UDG_UG_f1GT_f2CAG	24613	45097	45097	0	CGCGAGCTCGTUCAGCTCGCGGGAACGCGAGCTGGACGAGCTCGCGACACTCTTTCCCTTTTTTTTTT	46574.3
UDG_UG_f1CA_f2AAG	25274	46248	46248	0	CGCGAGCTCCAUAAGCTCGCGGGAACGCGAGCTTGTGGAGCTCGCGACACTCTTTCCCTTTTTTTTTT	47763
UDG_UG_f1TG_f2GGC	28277	51578	53116	0	CGCGAGCTCTGUGGCCTCGCGGGAACGCGAGGCCGCAGAGCTCGCGACACTCTTTCCCTTTTTTTTTT	54856
UDG_UG_f1GC_f2GAT	25618	46754	46754	0	CGCGAGCTCGCUGATCTCGCGGGAACGCGAGATCGGCGAGCTCGCGACACTCTTTCCCTTTTTTTTTT	48285.6
UDG_UG_f1TT_f2AAG	20243	37173	37173	0	CGCGAGCTCTTUAAGCTCGCGGGAACGCGAGCTTGAAGAGCTCGCGACACTCTTTCCCTTTTTTTTTT	38390.7
UDG_UG_f1GA_f2GCT	24255	44251	44251	0	CGCGAGCTCGAUGCTCTCGCGGGAACGCGAGAGCGTCGAGCTCGCGACACTCTTTCCCTTTTTTTTTT	45700.6
UDG_UG_f1CT_f2CTC	26146	47882	47882	0	CGCGAGCTCCTUCTCCTCGCGGGAACGCGAGGAGGAGGAGCTCGCGACACTCTTTCCCTTTTTTTTTT	49718.1
UDG_UG_f1TA_f2GGA	26512	48093	48093	0	CGCGAGCTCTAUGGACTCGCGGGAACGCGAGTCCGTAGAGCTCGCGACACTCTTTCCCTTTTTTTTTT	49937.2
UDG_UG_f1AA_f2TTG	26408	48563	48563	0	CGCGAGCTCAAUTTGCTCGCGGGAACGCGAGCAAGTTGAGCTCGCGACACTCTTTCCCTTTTTTTTTT	50425.3
UDG_UG_f1TA_f2TGT	24984	45586	45586	0	CGCGAGCTCTAUTGTCTCGCGGGAACGCGAGACAGTAGAGCTCGCGACACTCTTTCCCTTTTTTTTTT	47334.1
UDG_UG_f1TA_f2CCA	26111	48094	48094	0	CGCGAGCTCTAUCCACTCGCGGGAACGCGAGTGGGTAGAGCTCGCGACACTCTTTCCCTTTTTTTTTT	49938.3
UDG_UG_f1AA_f2TGG	24476	44836	44836	0	CGCGAGCTCAAUTGGCTCGCGGGAACGCGAGCCAGTTGAGCTCGCGACACTCTTTCCCTTTTTTTTTT	46555.3
UDG_UG_f1GT_f2TGT	23307	42559	42559	0	CGCGAGCTCGTUTGTCTCGCGGGAACGCGAGACAGACGAGCTCGCGACACTCTTTCCCTTTTTTTTTT	44109.2
UDG_UG_f1CG_f2CCA	29038	53158	54473	0	CGCGAGCTCCGUCCACTCGCGGGAACGCGAGTGGGCGGAGCTCGCGACACTCTTTCCCTTTTTTTTTT	56412.3
UDG_UG_f1GC_f2TTG	24033	43995	43995	0	CGCGAGCTCGCUTTGCTCGCGGGAACGCGAGCAAGGCGAGCTCGCGACACTCTTTCCCTTTTTTTTTT	45428.4
UDG_UG_f1TT_f2TAG	21403	39123	39123	0	CGCGAGCTCTTUTAGCTCGCGGGAACGCGAGCTAGAAGAGCTCGCGACACTCTTTCCCTTTTTTTTTT	40590
UDG_UG_f1GA_f2CAC	28143	51514	52877	0	CGCGAGCTCGAUCACCTCGCGGGAACGCGAGGTGGTCGAGCTCGCGACACTCTTTCCCTTTTTTTTTT	54885.7
UDG_UG_f1TC_f2TCT	22470	40984	40984	0	CGCGAGCTCTCUTCTCTCGCGGGAACGCGAGAGAGGAGAGCTCGCGACACTCTTTCCCTTTTTTTTTT	42555.6
UDG_UG_f1GC_f2TCG	23617	43396	43396	0	CGCGAGCTCGCUTCGCTCGCGGGAACGCGAGCGAGGCGAGCTCGCGACACTCTTTCCCTTTTTTTTTT	45044.6
UDG_UG_f1AG_f2TGC	26027	47899	47899	0	CGCGAGCTCAGUTGCCTCGCGGGAACGCGAGGCAGCTGAGCTCGCGACACTCTTTCCCTTTTTTTTTT	49663
UDG_UG_f1TT_f2AGT	23658	43338	43338	0	CGCGAGCTCTTUAGTCTCGCGGGAACGCGAGACTGAAGAGCTCGCGACACTCTTTCCCTTTTTTTTTT	44934
UDG_UG_f1AG_f2TGC	26256	47907	47907	0	CGCGAGCTCAGUTGCCTCGCGGGAACGCGAGGCAGCTGAGCTCGCGACACTCTTTCCCTTTTTTTTTT	49891.5
UDG_UG_f1AT_f2GAC	24853	45658	45658	0	CGCGAGCTCATUGACCTCGCGGGAACGCGAGGTCGATGAGCTCGCGACACTCTTTCCCTTTTTTTTTT	46942.3
UDG_MM_GG	8884	16347	16347	0	CGCGAGCTCACGCTTACCGCGGGAACGCGGTAAGGGTGAGCTCGCGACACTCTTTCCCTTTTTTTTTT	16757.1
UDG_UG_f1CT_f2CCA	26354	48344	48344	0	CGCGAGCTCCTUCCACTCGCGGGAACGCGAGTGGGAGGAGCTCGCGACACTCTTTCCCTTTTTTTTTT	49554.6
UDG_UG_f1TA_f2AAA	26535	48931	48931	0	CGCGAGCTCTAUAAACTCGCGGGAACGCGAGTTTGTAGAGCTCGCGACACTCTTTCCCTTTTTTTTTT	49968.1
UDG_UG_f1CC_f2TTC	25045	46056	46056	0	CGCGAGCTCCCUTTCCTCGCGGGAACGCGAGGAAGGGGAGCTCGCGACACTCTTTCCCTTTTTTTTTT	46964.4
UDG_UG_f1GG_f2CCG	31877	58441	59536	0	CGCGAGCTCGGUCCGCTCGCGGGAACGCGAGCGGGCCGAGCTCGCGACACTCTTTCCCTTTTTTTTTT	60797.8
UDG_UG_f1GT_f2GTG	25304	46960	46960	0	CGCGAGCTCGTUGTGCTCGCGGGAACGCGAGCACGACGAGCTCGCGACACTCTTTCCCTTTTTTTTTT	48003.1
UDG_UG_f1AG_f2GTC	28459	52548	53440	0	CGCGAGCTCAGUGTCCTCGCGGGAACGCGAGGACGCTGAGCTCGCGACACTCTTTCCCTTTTTTTTTT	54555.3
UDG_UG_f1AT_f2GTC	26063	47937	47937	0	CGCGAGCTCATUGTCCTCGCGGGAACGCGAGGACGATGAGCTCGCGACACTCTTTCCCTTTTTTTTTT	48826.7
UDG_UG_f1AC_f2GAC	25969	47385	47385	0	CGCGAGCTCACUGACCTCGCGGGAACGCGAGGTCGGTGAGCTCGCGACACTCTTTCCCTTTTTTTTTT	48123
UDG_UG_f1CG_f2GAA	25694	47419	47419	0	CGCGAGCTCCGUGAACTCGCGGGAACGCGAGTTCGCGGAGCTCGCGACACTCTTTCCCTTTTTTTTTT	48122
UDG_UG_f1GT_f2AGT	24446	44615	44615	0	CGCGAGCTCGTUAGTCTCGCGGGAACGCGAGACTGACGAGCTCGCGACACTCTTTCCCTTTTTTTTTT	45267.8
UDG_UG_f1AT_f2ATA	26022	47579	47579	0	CGCGAGCTCATUATACTCGCGGGAACGCGAGTATGATGAGCTCGCGACACTCTTTCCCTTTTTTTTTT	48320
UDG_UG_f1CT_f2TCA	23700	43375	43375	0	CGCGAGCTCCTUTCACTCGCGGGAACGCGAGTGAGAGGAGCTCGCGACACTCTTTCCCTTTTTTTTTT	43945.8
UDG_UG_f1GG_f2GGT	31034	57062	58032	0	CGCGAGCTCGGUGGTCTCGCGGGAACGCGAGACCGCCGAGCTCGCGACACTCTTTCCCTTTTTTTTTT	58903.5
UDG_random_6b_4	11954	21997	21997	0	CGCGAGCTCTCACGCCTCGCGGGAACGCGAGGCGTGAGAGCTCGCGACACTCTTTCCCTTTTTTTTTT	22402.4
UDG_UG_f1TA_f2CCT	27096	49900	49900	0	CGCGAGCTCTAUCCTCTCGCGGGAACGCGAGAGGGTAGAGCTCGCGACACTCTTTCCCTTTTTTTTTT	50819.7
UDG_UG_f1CA_f2GCG	29305	54093	54949	0	CGCGAGCTCCAUGCGCTCGCGGGAACGCGAGCGCGTGGAGCTCGCGACACTCTTTCCCTTTTTTTTTT	55966.5
UDG_UG_f1CC_f2CGC	30517	55914	57110	0	CGCGAGCTCCCUCGCCTCGCGGGAACGCGAGGCGGGGGAGCTCGCGACACTCTTTCCCTTTTTTTTTT	58167.5
UDG_UG_f1CT_f2GTG	26056	47934	47934	0	CGCGAGCTCCTUGTGCTCGCGGGAACGCGAGCACGAGGAGCTCGCGACACTCTTTCCCTTTTTTTTTT	48605.7
UDG_UG_f1CA_f2ACC	26986	49843	49843	0	CGCGAGCTCCAUACCCTCGCGGGAACGCGAGGGTGTGGAGCTCGCGACACTCTTTCCCTTTTTTTTTT	50765.9
UDG_UG_f1CG_f2CTG	29536	54029	55361	0	CGCGAGCTCCGUCTGCTCGCGGGAACGCGAGCAGGCGGAGCTCGCGACACTCTTTCCCTTTTTTTTTT	56192.4
UDG_random_6b_8	9043	16600	16600	0	CGCGAGCTCAATACACTCGCGGGAACGCGAGTGTATTGAGCTCGCGACACTCTTTCCCTTTTTTTTTT	16869.9
UDG_UG_f1AT_f2CAG	23190	42184	42184	0	CGCGAGCTCATUCAGCTCGCGGGAACGCGAGCTGGATGAGCTCGCGACACTCTTTCCCTTTTTTTTTT	43064.4
UDG_UG_f1AA_f2GGA	29414	54003	55143	0	CGCGAGCTCAAUGGACTCGCGGGAACGCGAGTCCGTTGAGCTCGCGACACTCTTTCCCTTTTTTTTTT	56210.4
UDG_UG_f1CC_f2CTA	27257	50146	51296	0	CGCGAGCTCCCUCTACTCGCGGGAACGCGAGTAGGGGGAGCTCGCGACACTCTTTCCCTTTTTTTTTT	52502.3
UDG_UG_f1GT_f2GAA	25096	45943	45943	0	CGCGAGCTCGTUGAACTCGCGGGAACGCGAGTTCGACGAGCTCGCGACACTCTTTCCCTTTTTTTTTT	47023.4
UDG_UG_f1TC_f2TAA	23165	42260	42260	0	CGCGAGCTCTCUTAACTCGCGGGAACGCGAGTTAGGAGAGCTCGCGACACTCTTTCCCTTTTTTTTTT	43042.5
UDG_UG_f1CG_f2CCT	32256	59167	60212	0	CGCGAGCTCCGUCCTCTCGCGGGAACGCGAGAGGGCGGAGCTCGCGACACTCTTTCCCTTTTTTTTTT	61191
UDG_UG_f1AT_f2CGA	25445	46752	46752	0	CGCGAGCTCATUCGACTCGCGGGAACGCGAGTCGGATGAGCTCGCGACACTCTTTCCCTTTTTTTTTT	47254.9
UDG_UG_f1CC_f2CAT	27510	50295	51748	0	CGCGAGCTCCCUCATCTCGCGGGAACGCGAGATGGGGGAGCTCGCGACACTCTTTCCCTTTTTTTTTT	52196.2
UDG_UG_f1TT_f2GAA	24271	44465	44465	0	CGCGAGCTCTTUGAACTCGCGGGAACGCGAGTTCGAAGAGCTCGCGACACTCTTTCCCTTTTTTTTTT	44955.6
UDG_UG_f1GA_f2TAA	26662	48646	48646	0	CGCGAGCTCGAUTAACTCGCGGGAACGCGAGTTAGTCGAGCTCGCGACACTCTTTCCCTTTTTTTTTT	49256.1
UDG_MM_TC	7617	13834	13834	0	CGCGAGCTCACTCTTACCGCGGGAACGCGGTAAGCGTGAGCTCGCGACACTCTTTCCCTTTTTTTTTT	14014.3
UDG_UG_f1TC_f2CGG	26189	48051	48051	0	CGCGAGCTCTCUCGGCTCGCGGGAACGCGAGCCGGGAGAGCTCGCGACACTCTTTCCCTTTTTTTTTT	48603.6
UDG_UG_f1GC_f2ATG	26722	48920	48920	0	CGCGAGCTCGCUATGCTCGCGGGAACGCGAGCATGGCGAGCTCGCGACACTCTTTCCCTTTTTTTTTT	49549.2
UDG_UG_f1TC_f2GCT	25807	47152	47152	0	CGCGAGCTCTCUGCTCTCGCGGGAACGCGAGAGCGGAGAGCTCGCGACACTCTTTCCCTTTTTTTTTT	47694.2
UDG_UG_f1TT_f2ATG	24933	45768	45768	0	CGCGAGCTCTTUATGCTCGCGGGAACGCGAGCATGAAGAGCTCGCGACACTCTTTCCCTTTTTTTTTT	46112.2
UDG_UG_f1TC_f2CAC	25926	47631	47631	0	CGCGAGCTCTCUCACCTCGCGGGAACGCGAGGTGGGAGAGCTCGCGACACTCTTTCCCTTTTTTTTTT	47931.1
UDG_UG_f1GT_f2TCT	24668	45346	45346	0	CGCGAGCTCGTUTCTCTCGCGGGAACGCGAGAGAGACGAGCTCGCGACACTCTTTCCCTTTTTTTTTT	45577.4
UDG_UG_f1TC_f2CTT	27558	50482	51833	0	CGCGAGCTCTCUCTTCTCGCGGGAACGCGAGAAGGGAGAGCTCGCGACACTCTTTCCCTTTTTTTTTT	52209.7
UDG_UG_f1CC_f2CGC	31680	58086	59184	0	CGCGAGCTCCCUCGCCTCGCGGGAACGCGAGGCGGGGGAGCTCGCGACACTCTTTCCCTTTTTTTTTT	59614.2
UDG_UG_f1GT_f2AGG	23986	43844	43844	0	CGCGAGCTCGTUAGGCTCGCGGGAACGCGAGCCTGACGAGCTCGCGACACTCTTTCCCTTTTTTTTTT	44223.7
UDG_UG_f1CG_f2GTA	27993	51035	52609	0	CGCGAGCTCCGUGTACTCGCGGGAACGCGAGTACGCGGAGCTCGCGACACTCTTTCCCTTTTTTTTTT	53238.6
UDG_UG_f1TG_f2CGT	28102	51434	52803	0	CGCGAGCTCTGUCGTCTCGCGGGAACGCGAGACGGCAGAGCTCGCGACACTCTTTCCCTTTTTTTTTT	53637.8
UDG_UG_f1AA_f2GCC	29168	53148	54705	0	CGCGAGCTCAAUGCCCTCGCGGGAACGCGAGGGCGTTGAGCTCGCGACACTCTTTCCCTTTTTTTTTT	56014.1
UDG_UG_f1TC_f2TTG	23802	43364	43364	0	CGCGAGCTCTCUTTGCTCGCGGGAACGCGAGCAAGGAGAGCTCGCGACACTCTTTCCCTTTTTTTTTT	44656.2
UDG_UG_f1CG_f2TCA	25602	46764	46764	0	CGCGAGCTCCGUTCACTCGCGGGAACGCGAGTGAGCGGAGCTCGCGACACTCTTTCCCTTTTTTTTTT	48295.9
UDG_UG_f1GA_f2TTA	27435	50203	51614	0	CGCGAGCTCGAUTTACTCGCGGGAACGCGAGTAAGTCGAGCTCGCGACACTCTTTCCCTTTTTTTTTT	53304.8
UDG_UG_f1CG_f2GAC	27925	51142	52488	0	CGCGAGCTCCGUGACCTCGCGGGAACGCGAGGTCGCGGAGCTCGCGACACTCTTTCCCTTTTTTTTTT	54207.4
UDG_UG_f1TG_f2TAT	23732	43364	43364	0	CGCGAGCTCTGUTATCTCGCGGGAACGCGAGATAGCAGAGCTCGCGACACTCTTTCCCTTTTTTTTTT	44784.5
UDG_UG_f1CA_f2AAT	25270	46477	46477	0	CGCGAGCTCCAUAATCTCGCGGGAACGCGAGATTGTGGAGCTCGCGACACTCTTTCCCTTTTTTTTTT	47999.5
UDG_UG_f1GA_f2TAC	23379	42916	42916	0	CGCGAGCTCGAUTACCTCGCGGGAACGCGAGGTAGTCGAGCTCGCGACACTCTTTCCCTTTTTTTTTT	44321.8
UDG_UG_f1CT_f2GGG	21642	39633	39633	0	CGCGAGCTCCTUGGGCTCGCGGGAACGCGAGCCCGAGGAGCTCGCGACACTCTTTCCCTTTTTTTTTT	40931.3
UDG_UG_f1CA_f2AGC	27186	49667	49667	0	CGCGAGCTCCAUAGCCTCGCGGGAACGCGAGGCTGTGGAGCTCGCGACACTCTTTCCCTTTTTTTTTT	51571.6
UDG_UG_f1CC_f2GGC	29056	53345	54505	0	CGCGAGCTCCCUGGCCTCGCGGGAACGCGAGGCCGGGGAGCTCGCGACACTCTTTCCCTTTTTTTTTT	56595.1
UDG_UG_f1AG_f2AGG	25060	45680	45680	0	CGCGAGCTCAGUAGGCTCGCGGGAACGCGAGCCTGCTGAGCTCGCGACACTCTTTCCCTTTTTTTTTT	47431.7
UDG_UG_f1AA_f2GCA	28353	51760	53251	0	CGCGAGCTCAAUGCACTCGCGGGAACGCGAGTGCGTTGAGCTCGCGACACTCTTTCCCTTTTTTTTTT	55293
UDG_UG_f1CA_f2TGG	24044	44122	44122	0	CGCGAGCTCCAUTGGCTCGCGGGAACGCGAGCCAGTGGAGCTCGCGACACTCTTTCCCTTTTTTTTTT	45814
UDG_UG_f1GC_f2GCA	27406	50217	51562	0	CGCGAGCTCGCUGCACTCGCGGGAACGCGAGTGCGGCGAGCTCGCGACACTCTTTCCCTTTTTTTTTT	53539.3
UDG_UG_f1GA_f2CGC	32275	58978	60246	0	CGCGAGCTCGAUCGCCTCGCGGGAACGCGAGGCGGTCGAGCTCGCGACACTCTTTCCCTTTTTTTTTT	62440.5
UDG_UG_f1GA_f2AAT	27340	49986	49986	0	CGCGAGCTCGAUAATCTCGCGGGAACGCGAGATTGTCGAGCTCGCGACACTCTTTCCCTTTTTTTTTT	51765.5
UDG_UG_f1TC_f2TCT	23193	42566	42566	0	CGCGAGCTCTCUTCTCTCGCGGGAACGCGAGAGAGGAGAGCTCGCGACACTCTTTCCCTTTTTTTTTT	43952.8
UDG_UG_f1TT_f2TAC	22568	41401	41401	0	CGCGAGCTCTTUTACCTCGCGGGAACGCGAGGTAGAAGAGCTCGCGACACTCTTTCCCTTTTTTTTTT	42953.4
UDG_UG_f1AC_f2CGT	26066	47575	47575	0	CGCGAGCTCACUCGTCTCGCGGGAACGCGAGACGGGTGAGCTCGCGACACTCTTTCCCTTTTTTTTTT	49382.3
UDG_UG_f1AA_f2ACG	25665	46912	46912	0	CGCGAGCTCAAUACGCTCGCGGGAACGCGAGCGTGTTGAGCTCGCGACACTCTTTCCCTTTTTTTTTT	48710.9
UDG_MM_TC	7938	14523	14523	0	CGCGAGCTCACTCTTACCGCGGGAACGCGGTAAGCGTGAGCTCGCGACACTCTTTCCCTTTTTTTTTT	15074.7
UDG_UG_f1GA_f2AGA	25405	46395	46395	0	CGCGAGCTCGAUAGACTCGCGGGAACGCGAGTCTGTCGAGCTCGCGACACTCTTTCCCTTTTTTTTTT	48103.6
UDG_UG_f1GC_f2ATG	25637	46735	46735	0	CGCGAGCTCGCUATGCTCGCGGGAACGCGAGCATGGCGAGCTCGCGACACTCTTTCCCTTTTTTTTTT	48456.1
UDG_UG_f1TG_f2TGT	23360	42959	42959	0	CGCGAGCTCTGUTGTCTCGCGGGAACGCGAGACAGCAGAGCTCGCGACACTCTTTCCCTTTTTTTTTT	44738.5
UDG_UG_f1CG_f2GTA	27082	49599	49599	0	CGCGAGCTCCGUGTACTCGCGGGAACGCGAGTACGCGGAGCTCGCGACACTCTTTCCCTTTTTTTTTT	50994.1
UDG_UG_f1GC_f2AGG	25116	45656	45656	0	CGCGAGCTCGCUAGGCTCGCGGGAACGCGAGCCTGGCGAGCTCGCGACACTCTTTCCCTTTTTTTTTT	46801.3
UDG_UG_f1TG_f2GCA	26470	48864	48864	0	CGCGAGCTCTGUGCACTCGCGGGAACGCGAGTGCGCAGAGCTCGCGACACTCTTTCCCTTTTTTTTTT	50087.7
UDG_UG_f1TA_f2GCG	25929	47655	47655	0	CGCGAGCTCTAUGCGCTCGCGGGAACGCGAGCGCGTAGAGCTCGCGACACTCTTTCCCTTTTTTTTTT	48665
UDG_UG_f1CA_f2GGT	28984	52835	54376	0	CGCGAGCTCCAUGGTCTCGCGGGAACGCGAGACCGTGGAGCTCGCGACACTCTTTCCCTTTTTTTTTT	55448.5
UDG_UG_f1AC_f2AAC	25770	47173	47173	0	CGCGAGCTCACUAACCTCGCGGGAACGCGAGGTTGGTGAGCTCGCGACACTCTTTCCCTTTTTTTTTT	48172.8
UDG_UG_f1CC_f2CAT	26347	48573	48573	0	CGCGAGCTCCCUCATCTCGCGGGAACGCGAGATGGGGGAGCTCGCGACACTCTTTCCCTTTTTTTTTT	49652
UDG_UG_f1TA_f2AAC	25966	47719	47719	0	CGCGAGCTCTAUAACCTCGCGGGAACGCGAGGTTGTAGAGCTCGCGACACTCTTTCCCTTTTTTTTTT	48714.9
UDG_UG_f1GA_f2TGT	25622	47226	47226	0	CGCGAGCTCGAUTGTCTCGCGGGAACGCGAGACAGTCGAGCTCGCGACACTCTTTCCCTTTTTTTTTT	48102.5
UDG_UG_f1GG_f2GCA	27778	51306	52226	0	CGCGAGCTCGGUGCACTCGCGGGAACGCGAGTGCGCCGAGCTCGCGACACTCTTTCCCTTTTTTTTTT	53039.4
UDG_UG_f1TG_f2CGG	25545	46892	46892	0	CGCGAGCTCTGUCGGCTCGCGGGAACGCGAGCCGGCAGAGCTCGCGACACTCTTTCCCTTTTTTTTTT	47587.2
UDG_UG_f1AG_f2TCA	25072	46250	46250	0	CGCGAGCTCAGUTCACTCGCGGGAACGCGAGTGAGCTGAGCTCGCGACACTCTTTCCCTTTTTTTTTT	46926.8
UDG_UG_f1AA_f2TAT	26516	48649	48649	0	CGCGAGCTCAAUTATCTCGCGGGAACGCGAGATAGTTGAGCTCGCGACACTCTTTCCCTTTTTTTTTT	49406.7
UDG_UG_f1AG_f2AAA	25402	46821	46821	0	CGCGAGCTCAGUAAACTCGCGGGAACGCGAGTTTGCTGAGCTCGCGACACTCTTTCCCTTTTTTTTTT	47437.1
UDG_UG_f1GA_f2CCA	31480	57899	58828	0	CGCGAGCTCGAUCCACTCGCGGGAACGCGAGTGGGTCGAGCTCGCGACACTCTTTCCCTTTTTTTTTT	59711.4
UDG_UG_f1AA_f2CGA	27379	50198	51514	0	CGCGAGCTCAAUCGACTCGCGGGAACGCGAGTCGGTTGAGCTCGCGACACTCTTTCCCTTTTTTTTTT	52463.4
UDG_UG_f1TA_f2ACA	26601	48415	48415	0	CGCGAGCTCTAUACACTCGCGGGAACGCGAGTGTGTAGAGCTCGCGACACTCTTTCCCTTTTTTTTTT	49307.3
UDG_UG_f1GC_f2CAA	26235	48305	48305	0	CGCGAGCTCGCUCAACTCGCGGGAACGCGAGTTGGGCGAGCTCGCGACACTCTTTCCCTTTTTTTTTT	49199.4
UDG_UG_f1AT_f2CAC	25850	47445	47445	0	CGCGAGCTCATUCACCTCGCGGGAACGCGAGGTGGATGAGCTCGCGACACTCTTTCCCTTTTTTTTTT	48323.5
UDG_UG_f1AC_f2TGG	21792	39969	39969	0	CGCGAGCTCACUTGGCTCGCGGGAACGCGAGCCAGGTGAGCTCGCGACACTCTTTCCCTTTTTTTTTT	40529.1
UDG_UG_f1AA_f2AGC	26967	49498	49498	0	CGCGAGCTCAAUAGCCTCGCGGGAACGCGAGGCTGTTGAGCTCGCGACACTCTTTCCCTTTTTTTTTT	50414.5
UDG_UG_f1GC_f2AAG	23462	43063	43063	0	CGCGAGCTCGCUAAGCTCGCGGGAACGCGAGCTTGGCGAGCTCGCGACACTCTTTCCCTTTTTTTTTT	43709.7
UDG_UG_f1GG_f2GTA	27706	50503	52097	0	CGCGAGCTCGGUGTACTCGCGGGAACGCGAGTACGCCGAGCTCGCGACACTCTTTCCCTTTTTTTTTT	52944.1
UDG_UG_f1TC_f2AGG	23577	42944	42944	0	CGCGAGCTCTCUAGGCTCGCGGGAACGCGAGCCTGGAGAGCTCGCGACACTCTTTCCCTTTTTTTTTT	43840.2
UDG_UG_f1TT_f2ATC	25488	46506	46506	0	CGCGAGCTCTTUATCCTCGCGGGAACGCGAGGATGAAGAGCTCGCGACACTCTTTCCCTTTTTTTTTT	47406.2
UDG_UG_f1AT_f2ACC	24409	44773	44773	0	CGCGAGCTCATUACCCTCGCGGGAACGCGAGGGTGATGAGCTCGCGACACTCTTTCCCTTTTTTTTTT	45825.9
UDG_UG_f1TC_f2ATT	25658	47333	47333	0	CGCGAGCTCTCUATTCTCGCGGGAACGCGAGAATGGAGAGCTCGCGACACTCTTTCCCTTTTTTTTTT	48446.1
UDG_UG_f1TG_f2GGG	26782	48820	48820	0	CGCGAGCTCTGUGGGCTCGCGGGAACGCGAGCCCGCAGAGCTCGCGACACTCTTTCCCTTTTTTTTTT	49724
UDG_UG_f1GT_f2ATG	25091	45784	45784	0	CGCGAGCTCGTUATGCTCGCGGGAACGCGAGCATGACGAGCTCGCGACACTCTTTCCCTTTTTTTTTT	46528.4
UDG_UG_f1TC_f2CGA	26655	48971	48971	0	CGCGAGCTCTCUCGACTCGCGGGAACGCGAGTCGGGAGAGCTCGCGACACTCTTTCCCTTTTTTTTTT	49497.8
UDG_UG_f1AC_f2CCC	28837	53082	54114	0	CGCGAGCTCACUCCCCTCGCGGGAACGCGAGGGGGGTGAGCTCGCGACACTCTTTCCCTTTTTTTTTT	54582.7
UDG_UG_f1GC_f2TAT	24535	44727	44727	0	CGCGAGCTCGCUTATCTCGCGGGAACGCGAGATAGGCGAGCTCGCGACACTCTTTCCCTTTTTTTTTT	45220.5
UDG_UG_f1TT_f2TCC	22555	41316	41316	0	CGCGAGCTCTTUTCCCTCGCGGGAACGCGAGGGAGAAGAGCTCGCGACACTCTTTCCCTTTTTTTTTT	41834.2
UDG_UG_f1CC_f2AGA	25792	47267	47267	0	CGCGAGCTCCCUAGACTCGCGGGAACGCGAGTCTGGGGAGCTCGCGACACTCTTTCCCTTTTTTTTTT	47883
UDG_UG_f1AC_f2ATA	26362	48055	48055	0	CGCGAGCTCACUATACTCGCGGGAACGCGAGTATGGTGAGCTCGCGACACTCTTTCCCTTTTTTTTTT	48607.6
UDG_UG_f1CT_f2GCG	26450	48160	48160	0	CGCGAGCTCCTUGCGCTCGCGGGAACGCGAGCGCGAGGAGCTCGCGACACTCTTTCCCTTTTTTTTTT	48779.4
UDG_UG_f1TA_f2CCG	25220	46223	46223	0	CGCGAGCTCTAUCCGCTCGCGGGAACGCGAGCGGGTAGAGCTCGCGACACTCTTTCCCTTTTTTTTTT	46754.5
UDG_UG_f1AC_f2AAA	25498	46694	46694	0	CGCGAGCTCACUAAACTCGCGGGAACGCGAGTTTGGTGAGCTCGCGACACTCTTTCCCTTTTTTTTTT	47045.2
UDG_UG_f1TG_f2CTT	26906	49248	49248	0	CGCGAGCTCTGUCTTCTCGCGGGAACGCGAGAAGGCAGAGCTCGCGACACTCTTTCCCTTTTTTTTTT	49558.3
UDG_UG_f1AA_f2AAC	27599	50448	51906	0	CGCGAGCTCAAUAACCTCGCGGGAACGCGAGGTTGTTGAGCTCGCGACACTCTTTCCCTTTTTTTTTT	52170.9
UDG_UG_f1CA_f2GCA	29135	52951	54646	0	CGCGAGCTCCAUGCACTCGCGGGAACGCGAGTGCGTGGAGCTCGCGACACTCTTTCCCTTTTTTTTTT	55043.2
UDG_UG_f1TA_f2ATA	28060	51297	52729	0	CGCGAGCTCTAUATACTCGCGGGAACGCGAGTATGTAGAGCTCGCGACACTCTTTCCCTTTTTTTTTT	53112.3
UDG_UG_f1CT_f2ACT	25227	46312	46312	0	CGCGAGCTCCTUACTCTCGCGGGAACGCGAGAGTGAGGAGCTCGCGACACTCTTTCCCTTTTTTTTTT	46713.1
UDG_UG_f1GA_f2GCG	30114	55167	56392	0	CGCGAGCTCGAUGCGCTCGCGGGAACGCGAGCGCGTCGAGCTCGCGACACTCTTTCCCTTTTTTTTTT	57066.9
UDG_UG_f1AA_f2ACC	27857	50655	52367	0	CGCGAGCTCAAUACCCTCGCGGGAACGCGAGGGTGTTGAGCTCGCGACACTCTTTCCCTTTTTTTTTT	53194.9
UDG_UG_f1CG_f2AGG	25758	46862	46862	0	CGCGAGCTCCGUAGGCTCGCGGGAACGCGAGCCTGCGGAGCTCGCGACACTCTTTCCCTTTTTTTTTT	47983.4
UDG_UG_f1AT_f2TCC	24248	44362	44362	0	CGCGAGCTCATUTCCCTCGCGGGAACGCGAGGGAGATGAGCTCGCGACACTCTTTCCCTTTTTTTTTT	45683.9
UDG_UG_f1TG_f2GCG	27005	49289	49289	0	CGCGAGCTCTGUGCGCTCGCGGGAACGCGAGCGCGCAGAGCTCGCGACACTCTTTCCCTTTTTTTTTT	50903.6
UDG_UG_f1CC_f2CTG	27234	50112	51255	0	CGCGAGCTCCCUCTGCTCGCGGGAACGCGAGCAGGGGGAGCTCGCGACACTCTTTCCCTTTTTTTTTT	52934
UDG_UG_f1GG_f2AAG	23982	43994	43994	0	CGCGAGCTCGGUAAGCTCGCGGGAACGCGAGCTTGCCGAGCTCGCGACACTCTTTCCCTTTTTTTTTT	45435.2
UDG_UG_f1CT_f2AGT	23579	42994	42994	0	CGCGAGCTCCTUAGTCTCGCGGGAACGCGAGACTGAGGAGCTCGCGACACTCTTTCCCTTTTTTTTTT	44402.4
UDG_UG_random_3U	32651	59781	60916	0	CGCGUCTACUCTUTATGCGCGGGAACGCGCATAGAGGGTAGGCGCGACACTCTTTCCCTTTTTTTTTT	62911.5
UDG_UG_f1TT_f2ACC	21098	38688	38688	0	CGCGAGCTCTTUACCCTCGCGGGAACGCGAGGGTGAAGAGCTCGCGACACTCTTTCCCTTTTTTTTTT	39955.3
UDG_UG_f1AG_f2ATA	21272	39054	39054	0	CGCGAGCTCAGUATACTCGCGGGAACGCGAGTATGCTGAGCTCGCGACACTCTTTCCCTTTTTTTTTT	40333.3
UDG_UG_f1AA_f2CCT	25602	46502	46502	0	CGCGAGCTCAAUCCTCTCGCGGGAACGCGAGAGGGTTGAGCTCGCGACACTCTTTCCCTTTTTTTTTT	48285.2
UDG_UG_f1CT_f2CTA	24960	45837	45837	0	CGCGAGCTCCTUCTACTCGCGGGAACGCGAGTAGGAGGAGCTCGCGACACTCTTTCCCTTTTTTTTTT	47594.7
UDG_UG_f1TT_f2ACT	23969	43934	43934	0	CGCGAGCTCTTUACTCTCGCGGGAACGCGAGAGTGAAGAGCTCGCGACACTCTTTCCCTTTTTTTTTT	45618.7
UDG_UG_f1AC_f2AAG	23590	43302	43302	0	CGCGAGCTCACUAAGCTCGCGGGAACGCGAGCTTGGTGAGCTCGCGACACTCTTTCCCTTTTTTTTTT	44962.5
UDG_UG_f1CC_f2TGG	23301	42884	42884	0	CGCGAGCTCCCUTGGCTCGCGGGAACGCGAGCCAGGGGAGCTCGCGACACTCTTTCCCTTTTTTTTTT	44528.5
UDG_UG_f1AT_f2GAC	24462	45108	45108	0	CGCGAGCTCATUGACCTCGCGGGAACGCGAGGTCGATGAGCTCGCGACACTCTTTCCCTTTTTTTTTT	46837.8
UDG_UG_f1TG_f2CTC	28283	51602	53126	0	CGCGAGCTCTGUCTCCTCGCGGGAACGCGAGGAGGCAGAGCTCGCGACACTCTTTCCCTTTTTTTTTT	55061.1
UDG_UG_f1AG_f2GGA	27068	49285	49285	0	CGCGAGCTCAGUGGACTCGCGGGAACGCGAGTCCGCTGAGCTCGCGACACTCTTTCCCTTTTTTTTTT	51039.6
UDG_UG_f1GA_f2TCA	26936	49216	49216	0	CGCGAGCTCGAUTCACTCGCGGGAACGCGAGTGAGTCGAGCTCGCGACACTCTTTCCCTTTTTTTTTT	50819.5
UDG_UG_f1CC_f2CCG	28412	51893	53356	0	CGCGAGCTCCCUCCGCTCGCGGGAACGCGAGCGGGGGGAGCTCGCGACACTCTTTCCCTTTTTTTTTT	55356.7
UDG_UG_f1AC_f2AAG	23864	43986	43986	0	CGCGAGCTCACUAAGCTCGCGGGAACGCGAGCTTGGTGAGCTCGCGACACTCTTTCCCTTTTTTTTTT	45657
UDG_UG_f1TG_f2TAA	24597	44916	44916	0	CGCGAGCTCTGUTAACTCGCGGGAACGCGAGTTAGCAGAGCTCGCGACACTCTTTCCCTTTTTTTTTT	46638.4
UDG_UG_f1GC_f2CTT	24228	44154	44154	0	CGCGAGCTCGCUCTTCTCGCGGGAACGCGAGAAGGGCGAGCTCGCGACACTCTTTCCCTTTTTTTTTT	45831.4
UDG_UG_f1TT_f2GTC	24361	44503	44503	0	CGCGAGCTCTTUGTCCTCGCGGGAACGCGAGGACGAAGAGCTCGCGACACTCTTTCCCTTTTTTTTTT	46141.9
UDG_UG_f1GT_f2AGT	24023	43898	43898	0	CGCGAGCTCGTUAGTCTCGCGGGAACGCGAGACTGACGAGCTCGCGACACTCTTTCCCTTTTTTTTTT	45514.6
UDG_MM_TT	8007	14586	14586	0	CGCGAGCTCACTCTTACCGCGGGAACGCGGTAAGTGTGAGCTCGCGACACTCTTTCCCTTTTTTTTTT	15190.2
UDG_UG_f1TT_f2TCA	22035	40360	40360	0	CGCGAGCTCTTUTCACTCGCGGGAACGCGAGTGAGAAGAGCTCGCGACACTCTTTCCCTTTTTTTTTT	41495.2
UDG_UG_f1CT_f2CGA	23107	42372	42372	0	CGCGAGCTCCTUCGACTCGCGGGAACGCGAGTCGGAGGAGCTCGCGACACTCTTTCCCTTTTTTTTTT	43434.9
UDG_UG_f1CC_f2AAA	24901	45707	45707	0	CGCGAGCTCCCUAAACTCGCGGGAACGCGAGTTTGGGGAGCTCGCGACACTCTTTCCCTTTTTTTTTT	46851.6
UDG_UG_random_5U	45276	65535	83431	0	CGCGCGAGUUAACUUUGCGCGGGAACGCGCGGGGTTGGCTCGCGCGACACTCTTTCCCTTTTTTTTTT	85199.3
UDG_UG_f1AT_f2GCA	26187	48038	48038	0	CGCGAGCTCATUGCACTCGCGGGAACGCGAGTGCGATGAGCTCGCGACACTCTTTCCCTTTTTTTTTT	48985.5
UDG_UG_f1CC_f2GCA	28175	51816	52934	0	CGCGAGCTCCCUGCACTCGCGGGAACGCGAGTGCGGGGAGCTCGCGACACTCTTTCCCTTTTTTTTTT	54055.9
UDG_UG_f1CT_f2GCC	26295	48500	48500	0	CGCGAGCTCCTUGCCCTCGCGGGAACGCGAGGGCGAGGAGCTCGCGACACTCTTTCCCTTTTTTTTTT	49577.4
UDG_UG_f1AA_f2TAA	25911	47550	47550	0	CGCGAGCTCAAUTAACTCGCGGGAACGCGAGTTAGTTGAGCTCGCGACACTCTTTCCCTTTTTTTTTT	48542.4
UDG_UG_f1AC_f2CAG	22558	41653	41653	0	CGCGAGCTCACUCAGCTCGCGGGAACGCGAGCTGGGTGAGCTCGCGACACTCTTTCCCTTTTTTTTTT	42426.1
UDG_UG_f1GG_f2CTT	28609	52321	53708	0	CGCGAGCTCGGUCTTCTCGCGGGAACGCGAGAAGGCCGAGCTCGCGACACTCTTTCCCTTTTTTTTTT	54544.4
UDG_UG_f1CT_f2CTC	24846	45553	45553	0	CGCGAGCTCCTUCTCCTCGCGGGAACGCGAGGAGGAGGAGCTCGCGACACTCTTTCCCTTTTTTTTTT	46228.3
UDG_UG_f1CA_f2TAG	23507	43131	43131	0	CGCGAGCTCCAUTAGCTCGCGGGAACGCGAGCTAGTGGAGCTCGCGACACTCTTTCCCTTTTTTTTTT	43762.1
UDG_UG_f1TT_f2CTA	24515	45052	45052	0	CGCGAGCTCTTUCTACTCGCGGGAACGCGAGTAGGAAGAGCTCGCGACACTCTTTCCCTTTTTTTTTT	45753.6
UDG_UG_f1AC_f2TCT	24956	45582	45582	0	CGCGAGCTCACUTCTCTCGCGGGAACGCGAGAGAGGTGAGCTCGCGACACTCTTTCCCTTTTTTTTTT	46181.8
UDG_UG_f1GG_f2TTC	27655	50711	52006	0	CGCGAGCTCGGUTTCCTCGCGGGAACGCGAGGAAGCCGAGCTCGCGACACTCTTTCCCTTTTTTTTTT	52787
UDG_UG_f1CG_f2GCA	29543	54206	55373	0	CGCGAGCTCCGUGCACTCGCGGGAACGCGAGTGCGCGGAGCTCGCGACACTCTTTCCCTTTTTTTTTT	56393.5
UDG_UG_f1CC_f2GAA	26165	47809	47809	0	CGCGAGCTCCCUGAACTCGCGGGAACGCGAGTTCGGGGAGCTCGCGACACTCTTTCCCTTTTTTTTTT	48690.1
UDG_UG_f1CA_f2ATA	28179	51487	52941	0	CGCGAGCTCCAUATACTCGCGGGAACGCGAGTATGTGGAGCTCGCGACACTCTTTCCCTTTTTTTTTT	53921.3
UDG_UG_f1TC_f2GCG	24816	47168	47168	0	CGCGAGCTCTCUGCGCTCGCGGGAACGCGAGCGCGGAGAGCTCGCGACACTCTTTCCCTTTTTTTTTT	48041.4
UDG_UG_f1TG_f2GGG	24118	44235	44235	0	CGCGAGCTCTGUGGGCTCGCGGGAACGCGAGCCCGCAGAGCTCGCGACACTCTTTCCCTTTTTTTTTT	44854.9
UDG_UG_f1TC_f2TCC	22453	41135	41135	0	CGCGAGCTCTCUTCCCTCGCGGGAACGCGAGGGAGGAGAGCTCGCGACACTCTTTCCCTTTTTTTTTT	41896.7
UDG_UG_f1GT_f2CAG	23206	42538	42538	0	CGCGAGCTCGTUCAGCTCGCGGGAACGCGAGCTGGACGAGCTCGCGACACTCTTTCCCTTTTTTTTTT	43176.8
UDG_UG_f1AG_f2GCA	26998	49173	49173	0	CGCGAGCTCAGUGCACTCGCGGGAACGCGAGTGCGCTGAGCTCGCGACACTCTTTCCCTTTTTTTTTT	49972.5
UDG_UG_f1AA_f2ACC	26476	48396	48396	0	CGCGAGCTCAAUACCCTCGCGGGAACGCGAGGGTGTTGAGCTCGCGACACTCTTTCCCTTTTTTTTTT	49406
UDG_UG_f1CA_f2TCT	26532	48643	48643	0	CGCGAGCTCCAUTCTCTCGCGGGAACGCGAGAGAGTGGAGCTCGCGACACTCTTTCCCTTTTTTTTTT	49584.6
UDG_UG_f1CA_f2CCG	29292	53567	54926	0	CGCGAGCTCCAUCCGCTCGCGGGAACGCGAGCGGGTGGAGCTCGCGACACTCTTTCCCTTTTTTTTTT	56217.7
UDG_UG_f1TA_f2GAA	26497	48486	48486	0	CGCGAGCTCTAUGAACTCGCGGGAACGCGAGTTCGTAGAGCTCGCGACACTCTTTCCCTTTTTTTTTT	49626.2
UDG_UG_f1TG_f2TAG	22468	41222	41222	0	CGCGAGCTCTGUTAGCTCGCGGGAACGCGAGCTAGCAGAGCTCGCGACACTCTTTCCCTTTTTTTTTT	41985.3
UDG_UG_f1CC_f2AAG	24182	44321	44321	0	CGCGAGCTCCCUAAGCTCGCGGGAACGCGAGCTTGGGGAGCTCGCGACACTCTTTCCCTTTTTTTTTT	45041.6
UDG_UG_f1CG_f2CGA	31021	56651	58009	0	CGCGAGCTCCGUCGACTCGCGGGAACGCGAGTCGGCGGAGCTCGCGACACTCTTTCCCTTTTTTTTTT	58633
UDG_UG_f1CT_f2ATG	25889	47610	47610	0	CGCGAGCTCCTUATGCTCGCGGGAACGCGAGCATGAGGAGCTCGCGACACTCTTTCCCTTTTTTTTTT	48022.3
UDG_UG_f1TC_f2TAG	22464	41202	41202	0	CGCGAGCTCTCUTAGCTCGCGGGAACGCGAGCTAGGAGAGCTCGCGACACTCTTTCCCTTTTTTTTTT	41656.6
UDG_UG_f1GA_f2ATG	30007	54172	56201	0	CGCGAGCTCGAUATGCTCGCGGGAACGCGAGCATGTCGAGCTCGCGACACTCTTTCCCTTTTTTTTTT	56905.9
UDG_UG_f1GT_f2TTC	26248	48207	48207	0	CGCGAGCTCGTUTTCCTCGCGGGAACGCGAGGAAGACGAGCTCGCGACACTCTTTCCCTTTTTTTTTT	48835.2
UDG_UG_f1GA_f2CCT	32660	59882	60932	0	CGCGAGCTCGAUCCTCTCGCGGGAACGCGAGAGGGTCGAGCTCGCGACACTCTTTCCCTTTTTTTTTT	61632.7
UDG_UG_f1AA_f2CTG	26565	48725	48725	0	CGCGAGCTCAAUCTGCTCGCGGGAACGCGAGCAGGTTGAGCTCGCGACACTCTTTCCCTTTTTTTTTT	49351.7
UDG_UG_f1GA_f2TGC	26858	49239	49239	0	CGCGAGCTCGAUTGCCTCGCGGGAACGCGAGGCAGTCGAGCTCGCGACACTCTTTCCCTTTTTTTTTT	49805.2
UDG_UG_f1CG_f2ACT	26155	47632	47632	0	CGCGAGCTCCGUACTCTCGCGGGAACGCGAGAGTGCGGAGCTCGCGACACTCTTTCCCTTTTTTTTTT	47990.3
UDG_UG_f1TT_f2CTC	24841	45678	45678	0	CGCGAGCTCTTUCTCCTCGCGGGAACGCGAGGAGGAAGAGCTCGCGACACTCTTTCCCTTTTTTTTTT	45965.8
UDG_UG_f1TA_f2TTG	25512	46757	46757	0	CGCGAGCTCTAUTTGCTCGCGGGAACGCGAGCAAGTAGAGCTCGCGACACTCTTTCCCTTTTTTTTTT	46995.6
UDG_UG_f1AT_f2AGG	24262	44301	44301	0	CGCGAGCTCATUAGGCTCGCGGGAACGCGAGCCTGATGAGCTCGCGACACTCTTTCCCTTTTTTTTTT	44623
UDG_UG_f1GA_f2CAT	29131	53220	54639	0	CGCGAGCTCGAUCATCTCGCGGGAACGCGAGATGGTCGAGCTCGCGACACTCTTTCCCTTTTTTTTTT	55036.1
UDG_UG_f1TT_f2CAC	25639	46928	46928	0	CGCGAGCTCTTUCACCTCGCGGGAACGCGAGGTGGAAGAGCTCGCGACACTCTTTCCCTTTTTTTTTT	47334.4
UDG_UG_f1GA_f2AAG	25962	47513	47513	0	CGCGAGCTCGAUAAGCTCGCGGGAACGCGAGCTTGTCGAGCTCGCGACACTCTTTCCCTTTTTTTTTT	48081.6
UDG_UG_f1GG_f2GTT	29649	53844	55562	0	CGCGAGCTCGGUGTTCTCGCGGGAACGCGAGAACGCCGAGCTCGCGACACTCTTTCCCTTTTTTTTTT	56440.4
UDG_UG_f1GC_f2CAA	27737	50635	52153	0	CGCGAGCTCGCUCAACTCGCGGGAACGCGAGTTGGGCGAGCTCGCGACACTCTTTCCCTTTTTTTTTT	53401
UDG_UG_f1GA_f2CAA	28789	52586	54029	0	CGCGAGCTCGAUCAACTCGCGGGAACGCGAGTTGGTCGAGCTCGCGACACTCTTTCCCTTTTTTTTTT	55639
UDG_UG_f1AA_f2TGT	26763	49094	49094	0	CGCGAGCTCAAUTGTCTCGCGGGAACGCGAGACAGTTGAGCTCGCGACACTCTTTCCCTTTTTTTTTT	50702.2
UDG_UG_f1CT_f2ATG	25471	46227	46227	0	CGCGAGCTCCTUATGCTCGCGGGAACGCGAGCATGAGGAGCTCGCGACACTCTTTCCCTTTTTTTTTT	47741.3
UDG_UG_f1AC_f2GGT	26618	48799	48799	0	CGCGAGCTCACUGGTCTCGCGGGAACGCGAGACCGGTGAGCTCGCGACACTCTTTCCCTTTTTTTTTT	50397.6
UDG_UG_f1GA_f2ACT	25495	46496	46496	0	CGCGAGCTCGAUACTCTCGCGGGAACGCGAGAGTGTCGAGCTCGCGACACTCTTTCCCTTTTTTTTTT	48019.1
UDG_UG_f1AT_f2CAG	21867	40197	40197	0	CGCGAGCTCATUCAGCTCGCGGGAACGCGAGCTGGATGAGCTCGCGACACTCTTTCCCTTTTTTTTTT	41513.8
UDG_UG_f1TT_f2CCT	21968	40462	40462	0	CGCGAGCTCTTUCCTCTCGCGGGAACGCGAGAGGGAAGAGCTCGCGACACTCTTTCCCTTTTTTTTTT	41787.4
UDG_UG_f1TT_f2GAA	20161	37045	37045	0	CGCGAGCTCTTUGAACTCGCGGGAACGCGAGTTCGAAGAGCTCGCGACACTCTTTCCCTTTTTTTTTT	38258.5
UDG_UG_f1CA_f2GTC	30596	55991	57251	0	CGCGAGCTCCAUGTCCTCGCGGGAACGCGAGGACGTGGAGCTCGCGACACTCTTTCCCTTTTTTTTTT	59640.6
UDG_UG_f1CT_f2CAC	27598	50128	51905	0	CGCGAGCTCCTUCACCTCGCGGGAACGCGAGGTGGAGGAGCTCGCGACACTCTTTCCCTTTTTTTTTT	54071.5
UDG_UG_f1AA_f2TGA	25384	46414	46414	0	CGCGAGCTCAAUTGACTCGCGGGAACGCGAGTCAGTTGAGCTCGCGACACTCTTTCCCTTTTTTTTTT	48351.3
UDG_UG_f1TG_f2CCT	27732	50625	52144	0	CGCGAGCTCTGUCCTCTCGCGGGAACGCGAGAGGGCAGAGCTCGCGACACTCTTTCCCTTTTTTTTTT	54320.4
UDG_UG_f1TA_f2GAA	25397	46164	46164	0	CGCGAGCTCTAUGAACTCGCGGGAACGCGAGTTCGTAGAGCTCGCGACACTCTTTCCCTTTTTTTTTT	48090.8
UDG_UG_f1TG_f2CAT	26224	48166	48166	0	CGCGAGCTCTGUCATCTCGCGGGAACGCGAGATGGCAGAGCTCGCGACACTCTTTCCCTTTTTTTTTT	50176.4
UDG_UG_f1CC_f2AAC	25797	47340	47340	0	CGCGAGCTCCCUAACCTCGCGGGAACGCGAGGTTGGGGAGCTCGCGACACTCTTTCCCTTTTTTTTTT	49315.9
UDG_UG_f1GA_f2AGC	27554	50436	51826	0	CGCGAGCTCGAUAGCCTCGCGGGAACGCGAGGCTGTCGAGCTCGCGACACTCTTTCCCTTTTTTTTTT	53989.2
UDG_UG_f1CC_f2CTC	27573	50165	51860	0	CGCGAGCTCCCUCTCCTCGCGGGAACGCGAGGAGGGGGAGCTCGCGACACTCTTTCCCTTTTTTTTTT	53830.1
UDG_UG_f1GT_f2ATG	24414	44785	44785	0	CGCGAGCTCGTUATGCTCGCGGGAACGCGAGCATGACGAGCTCGCGACACTCTTTCCCTTTTTTTTTT	46575.7
UDG_UG_f1GC_f2AAT	24791	45239	45239	0	CGCGAGCTCGCUAATCTCGCGGGAACGCGAGATTGGCGAGCTCGCGACACTCTTTCCCTTTTTTTTTT	47127.2
UDG_UG_f1GT_f2TCC	23644	43440	43440	0	CGCGAGCTCGTUTCCCTCGCGGGAACGCGAGGGAGACGAGCTCGCGACACTCTTTCCCTTTTTTTTTT	45308
UDG_UG_f1CT_f2CGG	25678	47263	47263	0	CGCGAGCTCCTUCGGCTCGCGGGAACGCGAGCCGGAGGAGCTCGCGACACTCTTTCCCTTTTTTTTTT	49531.4
UDG_UG_f1AC_f2TCC	23493	43003	43003	0	CGCGAGCTCACUTCCCTCGCGGGAACGCGAGGGAGGTGAGCTCGCGACACTCTTTCCCTTTTTTTTTT	44852.2
UDG_UG_f1GA_f2ATA	27508	50307	51744	0	CGCGAGCTCGAUATACTCGCGGGAACGCGAGTATGTCGAGCTCGCGACACTCTTTCCCTTTTTTTTTT	53949.2
UDG_UG_f1GC_f2TTT	22974	42014	42014	0	CGCGAGCTCGCUTTTCTCGCGGGAACGCGAGAAAGGCGAGCTCGCGACACTCTTTCCCTTTTTTTTTT	43665.6
UDG_UG_f1AG_f2ATG	25098	45908	45908	0	CGCGAGCTCAGUATGCTCGCGGGAACGCGAGCATGCTGAGCTCGCGACACTCTTTCCCTTTTTTTTTT	47652
UDG_UG_f1GG_f2AAG	25094	46172	46172	0	CGCGAGCTCGGUAAGCTCGCGGGAACGCGAGCTTGCCGAGCTCGCGACACTCTTTCCCTTTTTTTTTT	48086.7
UDG_UG_f1TC_f2GGT	26721	49377	49377	0	CGCGAGCTCTCUGGTCTCGCGGGAACGCGAGACCGGAGAGCTCGCGACACTCTTTCCCTTTTTTTTTT	50733.4
UDG_MM_TT	8595	15683	15683	0	CGCGAGCTCACTCTTACCGCGGGAACGCGGTAAGTGTGAGCTCGCGACACTCTTTCCCTTTTTTTTTT	16075.7
UDG_UG_f1TC_f2GGA	24361	44641	44641	0	CGCGAGCTCTCUGGACTCGCGGGAACGCGAGTCCGGAGAGCTCGCGACACTCTTTCCCTTTTTTTTTT	45684
UDG_UG_f1CT_f2ATC	25347	46336	46336	0	CGCGAGCTCCTUATCCTCGCGGGAACGCGAGGATGAGGAGCTCGCGACACTCTTTCCCTTTTTTTTTT	47303
UDG_UG_f1GG_f2CGT	29102	53382	54587	0	CGCGAGCTCGGUCGTCTCGCGGGAACGCGAGACGGCCGAGCTCGCGACACTCTTTCCCTTTTTTTTTT	55663.7
UDG_UG_f1TG_f2TTC	25146	46240	46240	0	CGCGAGCTCTGUTTCCTCGCGGGAACGCGAGGAAGCAGAGCTCGCGACACTCTTTCCCTTTTTTTTTT	47267.2
UDG_UG_f1AC_f2CAG	24095	43948	43948	0	CGCGAGCTCACUCAGCTCGCGGGAACGCGAGCTGGGTGAGCTCGCGACACTCTTTCCCTTTTTTTTTT	44814.8
UDG_UG_f1CG_f2GAA	26043	47454	47454	0	CGCGAGCTCCGUGAACTCGCGGGAACGCGAGTTCGCGGAGCTCGCGACACTCTTTCCCTTTTTTTTTT	48549.3
UDG_UG_f1CG_f2ATC	28711	52937	53890	0	CGCGAGCTCCGUATCCTCGCGGGAACGCGAGGATGCGGAGCTCGCGACACTCTTTCCCTTTTTTTTTT	55087.1
UDG_UG_f1TT_f2TTT	23470	43123	43123	0	CGCGAGCTCTTUTTTCTCGCGGGAACGCGAGAAAGAAGAGCTCGCGACACTCTTTCCCTTTTTTTTTT	44023
UDG_UG_f1GG_f2GCT	28470	52395	53460	0	CGCGAGCTCGGUGCTCTCGCGGGAACGCGAGAGCGCCGAGCTCGCGACACTCTTTCCCTTTTTTTTTT	54331.5
UDG_UG_f1TT_f2CGA	23012	42180	42180	0	CGCGAGCTCTTUCGACTCGCGGGAACGCGAGTCGGAAGAGCTCGCGACACTCTTTCCCTTTTTTTTTT	42805.3
UDG_UG_f1AT_f2GTC	25755	47286	47286	0	CGCGAGCTCATUGTCCTCGCGGGAACGCGAGGACGATGAGCTCGCGACACTCTTTCCCTTTTTTTTTT	47996.1
UDG_UG_f1AT_f2GGG	24734	45436	45436	0	CGCGAGCTCATUGGGCTCGCGGGAACGCGAGCCCGATGAGCTCGCGACACTCTTTCCCTTTTTTTTTT	46332.2
UDG_UG_f1GG_f2AGT	25910	47541	47541	0	CGCGAGCTCGGUAGTCTCGCGGGAACGCGAGACTGCCGAGCTCGCGACACTCTTTCCCTTTTTTTTTT	48254.9
UDG_UG_f1CC_f2CTG	27642	50603	51983	0	CGCGAGCTCCCUCTGCTCGCGGGAACGCGAGCAGGGGGAGCTCGCGACACTCTTTCCCTTTTTTTTTT	53008.3
UDG_UG_f1CT_f2ATC	25044	46070	46070	0	CGCGAGCTCCTUATCCTCGCGGGAACGCGAGGATGAGGAGCTCGCGACACTCTTTCCCTTTTTTTTTT	47154.4
UDG_UG_f1TG_f2TAG	22522	41534	41534	0	CGCGAGCTCTGUTAGCTCGCGGGAACGCGAGCTAGCAGAGCTCGCGACACTCTTTCCCTTTTTTTTTT	42594.9
UDG_UG_f1TC_f2ACG	24633	45063	45063	0	CGCGAGCTCTCUACGCTCGCGGGAACGCGAGCGTGGAGAGCTCGCGACACTCTTTCCCTTTTTTTTTT	46349.3
UDG_UG_f1GC_f2GAT	25774	47544	47544	0	CGCGAGCTCGCUGATCTCGCGGGAACGCGAGATCGGCGAGCTCGCGACACTCTTTCCCTTTTTTTTTT	48901.1
UDG_UG_f1CT_f2CAA	23328	42785	42785	0	CGCGAGCTCCTUCAACTCGCGGGAACGCGAGTTGGAGGAGCTCGCGACACTCTTTCCCTTTTTTTTTT	43866.7
UDG_UG_f1GA_f2CTG	27423	50425	51593	0	CGCGAGCTCGAUCTGCTCGCGGGAACGCGAGCAGGTCGAGCTCGCGACACTCTTTCCCTTTTTTTTTT	53065.7
UDG_UG_f1TA_f2CGG	23731	43405	43405	0	CGCGAGCTCTAUCGGCTCGCGGGAACGCGAGCCGGTAGAGCTCGCGACACTCTTTCCCTTTTTTTTTT	44513.7
UDG_UG_f1TC_f2GAT	22876	41876	41876	0	CGCGAGCTCTCUGATCTCGCGGGAACGCGAGATCGGAGAGCTCGCGACACTCTTTCCCTTTTTTTTTT	42945.7
UDG_UG_f1TT_f2CAT	23398	42958	42958	0	CGCGAGCTCTTUCATCTCGCGGGAACGCGAGATGGAAGAGCTCGCGACACTCTTTCCCTTTTTTTTTT	44193.7
UDG_UG_f1AA_f2AGA	26324	48327	48327	0	CGCGAGCTCAAUAGACTCGCGGGAACGCGAGTCTGTTGAGCTCGCGACACTCTTTCCCTTTTTTTTTT	49717.1
UDG_UG_f1TG_f2CCA	30164	55212	56481	0	CGCGAGCTCTGUCCACTCGCGGGAACGCGAGTGGGCAGAGCTCGCGACACTCTTTCCCTTTTTTTTTT	58486.7
UDG_UG_f1AC_f2GCC	27672	50580	52037	0	CGCGAGCTCACUGCCCTCGCGGGAACGCGAGGGCGGTGAGCTCGCGACACTCTTTCCCTTTTTTTTTT	53933.6
UDG_UG_f1CT_f2CCC	28418	52015	53367	0	CGCGAGCTCCTUCCCCTCGCGGGAACGCGAGGGGGAGGAGCTCGCGACACTCTTTCCCTTTTTTTTTT	54716.2
UDG_UG_f1GT_f2GCT	26567	48771	48771	0	CGCGAGCTCGTUGCTCTCGCGGGAACGCGAGAGCGACGAGCTCGCGACACTCTTTCCCTTTTTTTTTT	49917.9
UDG_UG_f1TC_f2TGT	24288	44302	44302	0	CGCGAGCTCTCUTGTCTCGCGGGAACGCGAGACAGGAGAGCTCGCGACACTCTTTCCCTTTTTTTTTT	45136.6
UDG_UG_f1GA_f2ATT	28105	51317	52809	0	CGCGAGCTCGAUATTCTCGCGGGAACGCGAGAATGTCGAGCTCGCGACACTCTTTCCCTTTTTTTTTT	53786.8
UDG_MM_AG	8806	16166	16166	0	CGCGAGCTCACACTTACCGCGGGAACGCGGTAAGGGTGAGCTCGCGACACTCTTTCCCTTTTTTTTTT	16428.9
UDG_UG_f1CC_f2CCC	29128	53323	54633	0	CGCGAGCTCCCUCCCCTCGCGGGAACGCGAGGGGGGGGAGCTCGCGACACTCTTTCCCTTTTTTTTTT	55501.4
UDG_UG_f1CC_f2TAA	26499	48570	48570	0	CGCGAGCTCCCUTAACTCGCGGGAACGCGAGTTAGGGGAGCTCGCGACACTCTTTCCCTTTTTTTTTT	49416
UDG_UG_f1GA_f2GGA	30792	56045	57601	0	CGCGAGCTCGAUGGACTCGCGGGAACGCGAGTCCGTCGAGCTCGCGACACTCTTTCCCTTTTTTTTTT	58681.2
UDG_UG_f1CT_f2GAC	26203	47810	47810	0	CGCGAGCTCCTUGACCTCGCGGGAACGCGAGGTCGAGGAGCTCGCGACACTCTTTCCCTTTTTTTTTT	48527
UDG_UG_f1AA_f2ACT	25862	47534	47534	0	CGCGAGCTCAAUACTCTCGCGGGAACGCGAGAGTGTTGAGCTCGCGACACTCTTTCCCTTTTTTTTTT	48285.5
UDG_UG_f1CG_f2ATA	25039	45420	45420	0	CGCGAGCTCCGUATACTCGCGGGAACGCGAGTATGCGGAGCTCGCGACACTCTTTCCCTTTTTTTTTT	46036.1
UDG_UG_f1CC_f2CGA	27109	49516	49516	0	CGCGAGCTCCCUCGACTCGCGGGAACGCGAGTCGGGGGAGCTCGCGACACTCTTTCCCTTTTTTTTTT	50063.3
UDG_UG_f1GT_f2CGC	27662	50509	52019	0	CGCGAGCTCGTUCGCCTCGCGGGAACGCGAGGCGGACGAGCTCGCGACACTCTTTCCCTTTTTTTTTT	52578.5
UDG_UG_f1AA_f2GTG	27401	50067	51553	0	CGCGAGCTCAAUGTGCTCGCGGGAACGCGAGCACGTTGAGCTCGCGACACTCTTTCCCTTTTTTTTTT	51940.7
UDG_UG_f1GC_f2ATG	25754	47032	47032	0	CGCGAGCTCGCUATGCTCGCGGGAACGCGAGCATGGCGAGCTCGCGACACTCTTTCCCTTTTTTTTTT	47539.9
UDG_UG_f1TC_f2ACA	25218	46303	46303	0	CGCGAGCTCTCUACACTCGCGGGAACGCGAGTGTGGAGAGCTCGCGACACTCTTTCCCTTTTTTTTTT	46814.8
UDG_UG_f1CG_f2ACG	26982	49213	49213	0	CGCGAGCTCCGUACGCTCGCGGGAACGCGAGCGTGCGGAGCTCGCGACACTCTTTCCCTTTTTTTTTT	49771.6
UDG_UG_f1GT_f2TGC	24636	45162	45162	0	CGCGAGCTCGTUTGCCTCGCGGGAACGCGAGGCAGACGAGCTCGCGACACTCTTTCCCTTTTTTTTTT	45775.6
UDG_UG_f1CT_f2TTT	25011	45637	45637	0	CGCGAGCTCCTUTTTCTCGCGGGAACGCGAGAAAGAGGAGCTCGCGACACTCTTTCCCTTTTTTTTTT	46658.7
UDG_UG_f1CC_f2GAT	27012	49374	49374	0	CGCGAGCTCCCUGATCTCGCGGGAACGCGAGATCGGGGAGCTCGCGACACTCTTTCCCTTTTTTTTTT	50825.7
UDG_UG_f1TA_f2GAC	26387	48151	48151	0	CGCGAGCTCTAUGACCTCGCGGGAACGCGAGGTCGTAGAGCTCGCGACACTCTTTCCCTTTTTTTTTT	49711.3
UDG_UG_f1CG_f2CAG	27432	49797	49797	0	CGCGAGCTCCGUCAGCTCGCGGGAACGCGAGCTGGCGGAGCTCGCGACACTCTTTCCCTTTTTTTTTT	51781.4
UDG_UG_f1TG_f2TTA	25527	46664	46664	0	CGCGAGCTCTGUTTACTCGCGGGAACGCGAGTAAGCAGAGCTCGCGACACTCTTTCCCTTTTTTTTTT	48523.5
UDG_UG_f1AC_f2GAC	25998	47650	47650	0	CGCGAGCTCACUGACCTCGCGGGAACGCGAGGTCGGTGAGCTCGCGACACTCTTTCCCTTTTTTTTTT	49548.8
UDG_UG_f1AT_f2TAA	21609	39482	39482	0	CGCGAGCTCATUTAACTCGCGGGAACGCGAGTTAGATGAGCTCGCGACACTCTTTCCCTTTTTTTTTT	41055.3
UDG_UG_f1CT_f2AAC	24107	44231	44231	0	CGCGAGCTCCTUAACCTCGCGGGAACGCGAGGTTGAGGAGCTCGCGACACTCTTTCCCTTTTTTTTTT	45993.6
UDG_UG_f1AT_f2ATT	22002	40364	40364	0	CGCGAGCTCATUATTCTCGCGGGAACGCGAGAATGATGAGCTCGCGACACTCTTTCCCTTTTTTTTTT	41972.5
UDG_UG_f1AG_f2CTC	24594	44905	44905	0	CGCGAGCTCAGUCTCCTCGCGGGAACGCGAGGAGGCTGAGCTCGCGACACTCTTTCCCTTTTTTTTTT	46694.4
UDG_UG_f1TT_f2CGG	20356	36918	36918	0	CGCGAGCTCTTUCGGCTCGCGGGAACGCGAGCCGGAAGAGCTCGCGACACTCTTTCCCTTTTTTTTTT	38389.2
UDG_UG_f1GC_f2CCA	29666	54497	55593	0	CGCGAGCTCGCUCCACTCGCGGGAACGCGAGTGGGGCGAGCTCGCGACACTCTTTCCCTTTTTTTTTT	57815.8
UDG_UG_f1AA_f2CAA	28497	51971	53508	0	CGCGAGCTCAAUCAACTCGCGGGAACGCGAGTTGGTTGAGCTCGCGACACTCTTTCCCTTTTTTTTTT	55647.5
UDG_UG_f1TG_f2GCG	26028	47352	47352	0	CGCGAGCTCTGUGCGCTCGCGGGAACGCGAGCGCGCAGAGCTCGCGACACTCTTTCCCTTTTTTTTTT	49245.3
UDG_UG_f1CA_f2TGA	24948	45594	45594	0	CGCGAGCTCCAUTGACTCGCGGGAACGCGAGTCAGTGGAGCTCGCGACACTCTTTCCCTTTTTTTTTT	47417
UDG_UG_f1AA_f2TCC	25695	46917	46917	0	CGCGAGCTCAAUTCCCTCGCGGGAACGCGAGGGAGTTGAGCTCGCGACACTCTTTCCCTTTTTTTTTT	48792.9
UDG_UG_f1GT_f2ACT	24396	44654	44654	0	CGCGAGCTCGTUACTCTCGCGGGAACGCGAGAGTGACGAGCTCGCGACACTCTTTCCCTTTTTTTTTT	46439.4
UDG_UG_f1CT_f2GAC	25147	46306	46306	0	CGCGAGCTCCTUGACCTCGCGGGAACGCGAGGTCGAGGAGCTCGCGACACTCTTTCCCTTTTTTTTTT	48157.5
UDG_UG_f1AC_f2CGC	27491	50165	51714	0	CGCGAGCTCACUCGCCTCGCGGGAACGCGAGGCGGGTGAGCTCGCGACACTCTTTCCCTTTTTTTTTT	53781.7
UDG_UG_f1CA_f2TAG	23774	43576	43576	0	CGCGAGCTCCAUTAGCTCGCGGGAACGCGAGCTAGTGGAGCTCGCGACACTCTTTCCCTTTTTTTTTT	45237.3
UDG_UG_f1AG_f2GAT	25237	46228	46228	0	CGCGAGCTCAGUGATCTCGCGGGAACGCGAGATCGCTGAGCTCGCGACACTCTTTCCCTTTTTTTTTT	48076.4
UDG_UG_f1CA_f2TCA	24660	44961	44961	0	CGCGAGCTCCAUTCACTCGCGGGAACGCGAGTGAGTGGAGCTCGCGACACTCTTTCCCTTTTTTTTTT	46837.6
UDG_UG_f1CT_f2CGT	24921	45719	45719	0	CGCGAGCTCCTUCGTCTCGCGGGAACGCGAGACGGAGGAGCTCGCGACACTCTTTCCCTTTTTTTTTT	47685
UDG_UG_f1CT_f2CAA	25425	46870	46870	0	CGCGAGCTCCTUCAACTCGCGGGAACGCGAGTTGGAGGAGCTCGCGACACTCTTTCCCTTTTTTTTTT	49131.3
UDG_UG_f1GG_f2ATG	26328	48325	48325	0	CGCGAGCTCGGUATGCTCGCGGGAACGCGAGCATGCCGAGCTCGCGACACTCTTTCCCTTTTTTTTTT	50656.5
UDG_UG_f1CT_f2TGC	23389	43120	43120	0	CGCGAGCTCCTUTGCCTCGCGGGAACGCGAGGCAGAGGAGCTCGCGACACTCTTTCCCTTTTTTTTTT	44974.3
UDG_UG_f1CA_f2CGC	28678	52623	53831	0	CGCGAGCTCCAUCGCCTCGCGGGAACGCGAGGCGGTGGAGCTCGCGACACTCTTTCCCTTTTTTTTTT	56077.8
UDG_Ulinker	38810	65535	71900	0	CGCGAGCTCGGCTATCTCGCGGGAACGCGAGATAGCCGAGCTCGCGAUACTCTTTCCCTTTTTTTTTT	74901
UDG_UG_f1CG_f2GCG	28566	52443	53631	0	CGCGAGCTCCGUGCGCTCGCGGGAACGCGAGCGCGCGGAGCTCGCGACACTCTTTCCCTTTTTTTTTT	55937.3
UDG_UG_f1AA_f2CCA	27898	51219	52440	0	CGCGAGCTCAAUCCACTCGCGGGAACGCGAGTGGGTTGAGCTCGCGACACTCTTTCCCTTTTTTTTTT	54036.1
UDG_UG_f1AG_f2CCT	29135	53729	54646	0	CGCGAGCTCAGUCCTCTCGCGGGAACGCGAGAGGGCTGAGCTCGCGACACTCTTTCCCTTTTTTTTTT	56045.5
UDG_UG_f1TA_f2GGA	25629	47071	47071	0	CGCGAGCTCTAUGGACTCGCGGGAACGCGAGTCCGTAGAGCTCGCGACACTCTTTCCCTTTTTTTTTT	48276.5
UDG_UG_f1AA_f2AAG	25832	47280	47280	0	CGCGAGCTCAAUAAGCTCGCGGGAACGCGAGCTTGTTGAGCTCGCGACACTCTTTCCCTTTTTTTTTT	48392.9
UDG_UG_f1AC_f2GTA	26148	48091	48091	0	CGCGAGCTCACUGTACTCGCGGGAACGCGAGTACGGTGAGCTCGCGACACTCTTTCCCTTTTTTTTTT	49214.6
UDG_UG_f1CT_f2GGA	25976	47768	47768	0	CGCGAGCTCCTUGGACTCGCGGGAACGCGAGTCCGAGGAGCTCGCGACACTCTTTCCCTTTTTTTTTT	48964.2
UDG_UG_f1AT_f2GAA	24854	45571	45571	0	CGCGAGCTCATUGAACTCGCGGGAACGCGAGTTCGATGAGCTCGCGACACTCTTTCCCTTTTTTTTTT	46635.8
UDG_UG_f1GG_f2AAT	27345	50008	51453	0	CGCGAGCTCGGUAATCTCGCGGGAACGCGAGATTGCCGAGCTCGCGACACTCTTTCCCTTTTTTTTTT	52765.1
UDG_UG_f1TA_f2TTG	25319	46477	46477	0	CGCGAGCTCTAUTTGCTCGCGGGAACGCGAGCAAGTAGAGCTCGCGACACTCTTTCCCTTTTTTTTTT	47640.9
UDG_UG_f1CC_f2AAC	25109	45944	45944	0	CGCGAGCTCCCUAACCTCGCGGGAACGCGAGGTTGGGGAGCTCGCGACACTCTTTCCCTTTTTTTTTT	47094.5
UDG_UG_f1GC_f2CCT	28695	52987	53861	0	CGCGAGCTCGCUCCTCTCGCGGGAACGCGAGAGGGGCGAGCTCGCGACACTCTTTCCCTTTTTTTTTT	55119.5
UDG_UG_f1TT_f2ACA	23278	42660	42660	0	CGCGAGCTCTTUACACTCGCGGGAACGCGAGTGTGAAGAGCTCGCGACACTCTTTCCCTTTTTTTTTT	43656.7
UDG_UG_f1GA_f2GTG	27280	50054	51337	0	CGCGAGCTCGAUGTGCTCGCGGGAACGCGAGCACGTCGAGCTCGCGACACTCTTTCCCTTTTTTTTTT	52425.1
UDG_random_6b_10	11631	21409	21409	0	CGCGAGCTCTGGGGCCTCGCGGGAACGCGAGGCCCCAGAGCTCGCGACACTCTTTCCCTTTTTTTTTT	21955.9
UDG_UG_f1TA_f2AAG	23414	42893	42893	0	CGCGAGCTCTAUAAGCTCGCGGGAACGCGAGCTTGTAGAGCTCGCGACACTCTTTCCCTTTTTTTTTT	43902.6
UDG_UG_f1AC_f2TTG	22460	41014	41014	0	CGCGAGCTCACUTTGCTCGCGGGAACGCGAGCAAGGTGAGCTCGCGACACTCTTTCCCTTTTTTTTTT	42184.7
UDG_UG_f1CT_f2AAT	24121	44338	44338	0	CGCGAGCTCCTUAATCTCGCGGGAACGCGAGATTGAGGAGCTCGCGACACTCTTTCCCTTTTTTTTTT	45613.4
UDG_UG_f1CG_f2GCG	28213	51844	53001	0	CGCGAGCTCCGUGCGCTCGCGGGAACGCGAGCGCGCGGAGCTCGCGACACTCTTTCCCTTTTTTTTTT	54700.8
UDG_UG_f1TC_f2ATG	24550	44995	44995	0	CGCGAGCTCTCUATGCTCGCGGGAACGCGAGCATGGAGAGCTCGCGACACTCTTTCCCTTTTTTTTTT	46532.8
UDG_UG_f1TA_f2AGT	25638	46938	46938	0	CGCGAGCTCTAUAGTCTCGCGGGAACGCGAGACTGTAGAGCTCGCGACACTCTTTCCCTTTTTTTTTT	48604.8
UDG_UG_f1CC_f2GCA	28830	52905	54102	0	CGCGAGCTCCCUGCACTCGCGGGAACGCGAGTGCGGGGAGCTCGCGACACTCTTTCCCTTTTTTTTTT	55658.2
UDG_UG_f1CG_f2TAA	24079	44024	44024	0	CGCGAGCTCCGUTAACTCGCGGGAACGCGAGTTAGCGGAGCTCGCGACACTCTTTCCCTTTTTTTTTT	45311.6
UDG_UG_f1TC_f2CTG	23332	42698	42698	0	CGCGAGCTCTCUCTGCTCGCGGGAACGCGAGCAGGGAGAGCTCGCGACACTCTTTCCCTTTTTTTTTT	43926.2
UDG_UG_random_2U	29314	53657	54965	0	CGCGUCTACUCTTTATGCGCGGGAACGCGCATAAAGGGTAGGCGCGACACTCTTTCCCTTTTTTTTTT	56546
UDG_UG_f1GC_f2CCA	27565	50494	51846	0	CGCGAGCTCGCUCCACTCGCGGGAACGCGAGTGGGGCGAGCTCGCGACACTCTTTCCCTTTTTTTTTT	53337.3
UDG_UG_f1AG_f2TAA	24209	44453	44453	0	CGCGAGCTCAGUTAACTCGCGGGAACGCGAGTTAGCTGAGCTCGCGACACTCTTTCCCTTTTTTTTTT	45652.7
UDG_UG_f1AA_f2AAT	27414	50063	51576	0	CGCGAGCTCAAUAATCTCGCGGGAACGCGAGATTGTTGAGCTCGCGACACTCTTTCCCTTTTTTTTTT	53407.5
UDG_UG_f1TA_f2CAG	23571	43182	43182	0	CGCGAGCTCTAUCAGCTCGCGGGAACGCGAGCTGGTAGAGCTCGCGACACTCTTTCCCTTTTTTTTTT	44715.5
UDG_UG_f1AA_f2ATT	27486	50412	51705	0	CGCGAGCTCAAUATTCTCGCGGGAACGCGAGAATGTTGAGCTCGCGACACTCTTTCCCTTTTTTTTTT	53012.2
UDG_UG_f1CT_f2TTA	23047	42221	42221	0	CGCGAGCTCCTUTTACTCGCGGGAACGCGAGTAAGAGGAGCTCGCGACACTCTTTCCCTTTTTTTTTT	43288.4
UDG_UG_f1CC_f2ACG	25978	47773	47773	0	CGCGAGCTCCCUACGCTCGCGGGAACGCGAGCGTGGGGAGCTCGCGACACTCTTTCCCTTTTTTTTTT	48771.1
UDG_UG_f1TT_f2GAC	25445	46402	46402	0	CGCGAGCTCTTUGACCTCGCGGGAACGCGAGGTCGAAGAGCTCGCGACACTCTTTCCCTTTTTTTTTT	47371.4
UDG_UG_f1TA_f2GCT	27299	49808	49808	0	CGCGAGCTCTAUGCTCTCGCGGGAACGCGAGAGCGTAGAGCTCGCGACACTCTTTCCCTTTTTTTTTT	50802.3
UDG_UG_f1TT_f2GCG	24412	44552	44552	0	CGCGAGCTCTTUGCGCTCGCGGGAACGCGAGCGCGAAGAGCTCGCGACACTCTTTCCCTTTTTTTTTT	45441.3
UDG_UG_f1AC_f2CCA	28457	51961	53437	0	CGCGAGCTCACUCCACTCGCGGGAACGCGAGTGGGGTGAGCTCGCGACACTCTTTCCCTTTTTTTTTT	54553.4
UDG_UG_f1CT_f2CTA	26202	47913	47913	0	CGCGAGCTCCTUCTACTCGCGGGAACGCGAGTAGGAGGAGCTCGCGACACTCTTTCCCTTTTTTTTTT	48977.3
UDG_UG_f1CG_f2ACC	29602	53742	55479	0	CGCGAGCTCCGUACCCTCGCGGGAACGCGAGGGTGCGGAGCTCGCGACACTCTTTCCCTTTTTTTTTT	56524.2
UDG_UG_f1CT_f2CGC	27801	50914	52267	0	CGCGAGCTCCTUCGCCTCGCGGGAACGCGAGGCGGAGGAGCTCGCGACACTCTTTCCCTTTTTTTTTT	53276.5
UDG_UG_f1TG_f2GCT	25736	47271	47271	0	CGCGAGCTCTGUGCTCTCGCGGGAACGCGAGAGCGCAGAGCTCGCGACACTCTTTCCCTTTTTTTTTT	48157.5
UDG_UG_f1AC_f2GGC	27205	49753	49753	0	CGCGAGCTCACUGGCCTCGCGGGAACGCGAGGCCGGTGAGCTCGCGACACTCTTTCCCTTTTTTTTTT	50405.6
UDG_UG_f1TA_f2TAG	23302	42425	42425	0	CGCGAGCTCTAUTAGCTCGCGGGAACGCGAGCTAGTAGAGCTCGCGACACTCTTTCCCTTTTTTTTTT	42932.7
UDG_UG_f1TT_f2CAT	24431	44393	44393	0	CGCGAGCTCTTUCATCTCGCGGGAACGCGAGATGGAAGAGCTCGCGACACTCTTTCCCTTTTTTTTTT	44882.8
UDG_UG_f1AC_f2AGG	24211	44381	44381	0	CGCGAGCTCACUAGGCTCGCGGGAACGCGAGCCTGGTGAGCTCGCGACACTCTTTCCCTTTTTTTTTT	44951.8
UDG_UG_f1TT_f2GGC	25845	47546	47546	0	CGCGAGCTCTTUGGCCTCGCGGGAACGCGAGGCCGAAGAGCTCGCGACACTCTTTCCCTTTTTTTTTT	48169.7
UDG_UG_f1AT_f2AGC	24524	44850	44850	0	CGCGAGCTCATUAGCCTCGCGGGAACGCGAGGCTGATGAGCTCGCGACACTCTTTCCCTTTTTTTTTT	45458.4
UDG_UG_f1GG_f2TTT	26419	48461	48461	0	CGCGAGCTCGGUTTTCTCGCGGGAACGCGAGAAAGCCGAGCTCGCGACACTCTTTCCCTTTTTTTTTT	49262.5
UDG_UG_f1CA_f2GGG	28026	51210	52668	0	CGCGAGCTCCAUGGGCTCGCGGGAACGCGAGCCCGTGGAGCTCGCGACACTCTTTCCCTTTTTTTTTT	54047.9
UDG_random_6b_2	10162	18763	18763	0	CGCGAGCTCCCTGTTCTCGCGGGAACGCGAGAACAGGGAGCTCGCGACACTCTTTCCCTTTTTTTTTT	19363.5
UDG_UG_f1TC_f2TTT	24037	43787	43787	0	CGCGAGCTCTCUTTTCTCGCGGGAACGCGAGAAAGGAGAGCTCGCGACACTCTTTCCCTTTTTTTTTT	45434.8
UDG_UG_f1TC_f2TAC	23917	43793	43793	0	CGCGAGCTCTCUTACCTCGCGGGAACGCGAGGTAGGAGAGCTCGCGACACTCTTTCCCTTTTTTTTTT	45657.4
UDG_UG_f1CA_f2TTG	26645	48852	48852	0	CGCGAGCTCCAUTTGCTCGCGGGAACGCGAGCAAGTGGAGCTCGCGACACTCTTTCCCTTTTTTTTTT	50931.8
UDG_UG_f1AC_f2CAT	26076	47911	47911	0	CGCGAGCTCACUCATCTCGCGGGAACGCGAGATGGGTGAGCTCGCGACACTCTTTCCCTTTTTTTTTT	49950.7
UDG_UG_f1CT_f2CTT	23621	43255	43255	0	CGCGAGCTCCTUCTTCTCGCGGGAACGCGAGAAGGAGGAGCTCGCGACACTCTTTCCCTTTTTTTTTT	45096.5
UDG_UG_f1TT_f2AAC	23291	42548	42548	0	CGCGAGCTCTTUAACCTCGCGGGAACGCGAGGTTGAAGAGCTCGCGACACTCTTTCCCTTTTTTTTTT	44359.4
UDG_UG_f1CA_f2GAT	22901	41960	41960	0	CGCGAGCTCCAUGATCTCGCGGGAACGCGAGATCGTGGAGCTCGCGACACTCTTTCCCTTTTTTTTTT	43746.4
UDG_UG_f1TT_f2ATT	21534	39588	39588	0	CGCGAGCTCTTUATTCTCGCGGGAACGCGAGAATGAAGAGCTCGCGACACTCTTTCCCTTTTTTTTTT	41273.4
UDG_UG_f1GC_f2TAC	23461	43367	43367	0	CGCGAGCTCGCUTACCTCGCGGGAACGCGAGGTAGGCGAGCTCGCGACACTCTTTCCCTTTTTTTTTT	45213.3
UDG_UG_f1TG_f2TAC	25304	46305	46305	0	CGCGAGCTCTGUTACCTCGCGGGAACGCGAGGTAGCAGAGCTCGCGACACTCTTTCCCTTTTTTTTTT	48099.3
UDG_UG_f1CG_f2ACG	28168	51466	52921	0	CGCGAGCTCCGUACGCTCGCGGGAACGCGAGCGTGCGGAGCTCGCGACACTCTTTCCCTTTTTTTTTT	54971.7
UDG_UG_f1TC_f2AAG	23884	43433	43433	0	CGCGAGCTCTCUAAGCTCGCGGGAACGCGAGCTTGGAGAGCTCGCGACACTCTTTCCCTTTTTTTTTT	45116
UDG_UG_f1GT_f2GCT	25906	47141	47141	0	CGCGAGCTCGTUGCTCTCGCGGGAACGCGAGAGCGACGAGCTCGCGACACTCTTTCCCTTTTTTTTTT	48967.7
UDG_UG_f1AT_f2TTA	23699	43486	43486	0	CGCGAGCTCATUTTACTCGCGGGAACGCGAGTAAGATGAGCTCGCGACACTCTTTCCCTTTTTTTTTT	45171.1
UDG_UG_f1CG_f2TAC	24520	45353	45353	0	CGCGAGCTCCGUTACCTCGCGGGAACGCGAGGTAGCGGAGCTCGCGACACTCTTTCCCTTTTTTTTTT	47110.4
UDG_UG_f1AT_f2ATG	24318	44706	44706	0	CGCGAGCTCATUATGCTCGCGGGAACGCGAGCATGATGAGCTCGCGACACTCTTTCCCTTTTTTTTTT	46438.4
UDG_UG_f1AA_f2GCT	26268	48171	48171	0	CGCGAGCTCAAUGCTCTCGCGGGAACGCGAGAGCGTTGAGCTCGCGACACTCTTTCCCTTTTTTTTTT	50037.6
UDG_UG_f1AG_f2GCT	26026	47922	47922	0	CGCGAGCTCAGUGCTCTCGCGGGAACGCGAGAGCGCTGAGCTCGCGACACTCTTTCCCTTTTTTTTTT	49779
UDG_UG_f1TA_f2ACG	24280	44611	44611	0	CGCGAGCTCTAUACGCTCGCGGGAACGCGAGCGTGTAGAGCTCGCGACACTCTTTCCCTTTTTTTTTT	46537.4
UDG_UG_f1AA_f2CGG	26018	47584	47584	0	CGCGAGCTCAAUCGGCTCGCGGGAACGCGAGCCGGTTGAGCTCGCGACACTCTTTCCCTTTTTTTTTT	49824.5
UDG_UG_f1TT_f2GGG	24003	43876	43876	0	CGCGAGCTCTTUGGGCTCGCGGGAACGCGAGCCCGAAGAGCTCGCGACACTCTTTCCCTTTTTTTTTT	46087.2
UDG_UG_f1GT_f2GAA	24941	45562	45562	0	CGCGAGCTCGTUGAACTCGCGGGAACGCGAGTTCGACGAGCTCGCGACACTCTTTCCCTTTTTTTTTT	48056.2
UDG_UG_f1CA_f2CGA	28272	51440	53107	0	CGCGAGCTCCAUCGACTCGCGGGAACGCGAGTCGGTGGAGCTCGCGACACTCTTTCCCTTTTTTTTTT	55980
UDG_UG_f1CC_f2GGG	27063	49711	49711	0	CGCGAGCTCCCUGGGCTCGCGGGAACGCGAGCCCGGGGAGCTCGCGACACTCTTTCCCTTTTTTTTTT	52368.1
UDG_random_6b_7	10689	19671	19671	0	CGCGAGCTCCCGGAACTCGCGGGAACGCGAGTTCCGGGAGCTCGCGACACTCTTTCCCTTTTTTTTTT	20634.9
UDG_UG_f1AT_f2CGG	23005	42072	42072	0	CGCGAGCTCATUCGGCTCGCGGGAACGCGAGCCGGATGAGCTCGCGACACTCTTTCCCTTTTTTTTTT	44133.5
UDG_UG_f1TT_f2GTA	25622	46840	46840	0	CGCGAGCTCTTUGTACTCGCGGGAACGCGAGTACGAAGAGCTCGCGACACTCTTTCCCTTTTTTTTTT	49338.3
UDG_UG_f1CC_f2AAT	25555	46916	46916	0	CGCGAGCTCCCUAATCTCGCGGGAACGCGAGATTGGGGAGCTCGCGACACTCTTTCCCTTTTTTTTTT	48760.3
UDG_UG_f1TT_f2AGT	24768	45357	45357	0	CGCGAGCTCTTUAGTCTCGCGGGAACGCGAGACTGAAGAGCTCGCGACACTCTTTCCCTTTTTTTTTT	46834.8
UDG_random_6b_10	11597	21211	21211	0	CGCGAGCTCTGGGGCCTCGCGGGAACGCGAGGCCCCAGAGCTCGCGACACTCTTTCCCTTTTTTTTTT	21921.3
UDG_UG_f1CT_f2CTA	23913	44009	44009	0	CGCGAGCTCCTUCTACTCGCGGGAACGCGAGTAGGAGGAGCTCGCGACACTCTTTCCCTTTTTTTTTT	45348.5
UDG_UG_f1GT_f2TAC	22758	41610	41610	0	CGCGAGCTCGTUTACCTCGCGGGAACGCGAGGTAGACGAGCTCGCGACACTCTTTCCCTTTTTTTTTT	42753
UDG_UG_f1CT_f2CGG	24633	45076	45076	0	CGCGAGCTCCTUCGGCTCGCGGGAACGCGAGCCGGAGGAGCTCGCGACACTCTTTCCCTTTTTTTTTT	46448
UDG_UG_f1GC_f2ATG	26155	47884	47884	0	CGCGAGCTCGCUATGCTCGCGGGAACGCGAGCATGGCGAGCTCGCGACACTCTTTCCCTTTTTTTTTT	49176.3
UDG_UG_f1TA_f2GGA	28230	51686	53032	0	CGCGAGCTCTAUGGACTCGCGGGAACGCGAGTCCGTAGAGCTCGCGACACTCTTTCCCTTTTTTTTTT	54732.8
UDG_UG_f1TG_f2ACA	25270	46501	46501	0	CGCGAGCTCTGUACACTCGCGGGAACGCGAGTGTGCAGAGCTCGCGACACTCTTTCCCTTTTTTTTTT	47992.4
UDG_UG_f1TG_f2GCT	25267	46870	46870	0	CGCGAGCTCTGUGCTCTCGCGGGAACGCGAGAGCGCAGAGCTCGCGACACTCTTTCCCTTTTTTTTTT	48516.7
UDG_UG_f1TT_f2ATT	25522	46661	46661	0	CGCGAGCTCTTUATTCTCGCGGGAACGCGAGAATGAAGAGCTCGCGACACTCTTTCCCTTTTTTTTTT	48300.3
UDG_UG_f1AG_f2CCA	28269	51657	53101	0	CGCGAGCTCAGUCCACTCGCGGGAACGCGAGTGGGCTGAGCTCGCGACACTCTTTCCCTTTTTTTTTT	54992.6
UDG_UG_f1TG_f2TTA	23240	42633	42633	0	CGCGAGCTCTGUTTACTCGCGGGAACGCGAGTAAGCAGAGCTCGCGACACTCTTTCCCTTTTTTTTTT	44088.2
UDG_UG_f1GG_f2CTT	29205	53723	54771	0	CGCGAGCTCGGUCTTCTCGCGGGAACGCGAGAAGGCCGAGCTCGCGACACTCTTTCCCTTTTTTTTTT	56821.1
UDG_UG_f1CT_f2CCA	25539	46568	46568	0	CGCGAGCTCCTUCCACTCGCGGGAACGCGAGTGGGAGGAGCTCGCGACACTCTTTCCCTTTTTTTTTT	48204.1
UDG_UG_f1TT_f2GTG	23739	43393	43393	0	CGCGAGCTCTTUGTGCTCGCGGGAACGCGAGCACGAAGAGCTCGCGACACTCTTTCCCTTTTTTTTTT	45044.4
UDG_UG_f1CG_f2TGG	23098	42210	42210	0	CGCGAGCTCCGUTGGCTCGCGGGAACGCGAGCCAGCGGAGCTCGCGACACTCTTTCCCTTTTTTTTTT	43964.2
UDG_UG_f1AT_f2TAG	22106	40398	40398	0	CGCGAGCTCATUTAGCTCGCGGGAACGCGAGCTAGATGAGCTCGCGACACTCTTTCCCTTTTTTTTTT	42145.2
UDG_UG_f1TC_f2AGC	25130	46000	46000	0	CGCGAGCTCTCUAGCCTCGCGGGAACGCGAGGCTGGAGAGCTCGCGACACTCTTTCCCTTTTTTTTTT	48084.3
UDG_UG_f1AC_f2GAA	25899	47463	47463	0	CGCGAGCTCACUGAACTCGCGGGAACGCGAGTTCGGTGAGCTCGCGACACTCTTTCCCTTTTTTTTTT	49613.6
UDG_UG_f1GT_f2GAA	24948	45779	45779	0	CGCGAGCTCGTUGAACTCGCGGGAACGCGAGTTCGACGAGCTCGCGACACTCTTTCCCTTTTTTTTTT	47625.9
UDG_UG_f1GA_f2GCA	30333	55413	56782	0	CGCGAGCTCGAUGCACTCGCGGGAACGCGAGTGCGTCGAGCTCGCGACACTCTTTCCCTTTTTTTTTT	59062.6
UDG_UG_f1TA_f2TTT	28336	51971	53221	0	CGCGAGCTCTAUTTTCTCGCGGGAACGCGAGAAAGTAGAGCTCGCGACACTCTTTCCCTTTTTTTTTT	55226.1
UDG_UG_f1GT_f2TCG	22381	41070	41070	0	CGCGAGCTCGTUTCGCTCGCGGGAACGCGAGCGAGACGAGCTCGCGACACTCTTTCCCTTTTTTTTTT	42566.9
UDG_UG_f1CC_f2ATG	24800	45505	45505	0	CGCGAGCTCCCUATGCTCGCGGGAACGCGAGCATGGGGAGCTCGCGACACTCTTTCCCTTTTTTTTTT	47121
UDG_UG_f1GC_f2CAC	27940	50746	52515	0	CGCGAGCTCGCUCACCTCGCGGGAACGCGAGGTGGGCGAGCTCGCGACACTCTTTCCCTTTTTTTTTT	54093.8
UDG_UG_f1GT_f2ACC	25232	46290	46290	0	CGCGAGCTCGTUACCCTCGCGGGAACGCGAGGGTGACGAGCTCGCGACACTCTTTCCCTTTTTTTTTT	48022.6
UDG_UG_f1AC_f2GCT	26007	47561	47561	0	CGCGAGCTCACUGCTCTCGCGGGAACGCGAGAGCGGTGAGCTCGCGACACTCTTTCCCTTTTTTTTTT	49294.5
UDG_UG_f1TT_f2CTA	24605	44934	44934	0	CGCGAGCTCTTUCTACTCGCGGGAACGCGAGTAGGAAGAGCTCGCGACACTCTTTCCCTTTTTTTTTT	46146.7
UDG_UG_f1AA_f2AAA	27898	51080	52440	0	CGCGAGCTCAAUAAACTCGCGGGAACGCGAGTTTGTTGAGCTCGCGACACTCTTTCCCTTTTTTTTTT	54016.5
UDG_UG_f1TC_f2AAG	22780	41769	41769	0	CGCGAGCTCTCUAAGCTCGCGGGAACGCGAGCTTGGAGAGCTCGCGACACTCTTTCCCTTTTTTTTTT	42751.3
UDG_UG_f1AC_f2TAC	23337	42600	42600	0	CGCGAGCTCACUTACCTCGCGGGAACGCGAGGTAGGTGAGCTCGCGACACTCTTTCCCTTTTTTTTTT	43601.8
UDG_UG_f1AT_f2TTT	23593	43161	43161	0	CGCGAGCTCATUTTTCTCGCGGGAACGCGAGAAAGATGAGCTCGCGACACTCTTTCCCTTTTTTTTTT	44146
UDG_UG_f1TG_f2GCT	25915	47111	47111	0	CGCGAGCTCTGUGCTCTCGCGGGAACGCGAGAGCGCAGAGCTCGCGACACTCTTTCCCTTTTTTTTTT	48157.5
UDG_UG_f1AG_f2CTC	28903	52770	54232	0	CGCGAGCTCAGUCTCCTCGCGGGAACGCGAGGAGGCTGAGCTCGCGACACTCTTTCCCTTTTTTTTTT	55469.7
UDG_UG_f1TC_f2AAC	24846	45455	45455	0	CGCGAGCTCTCUAACCTCGCGGGAACGCGAGGTTGGAGAGCTCGCGACACTCTTTCCCTTTTTTTTTT	46681.7
UDG_UG_f1AA_f2TGG	24706	45109	45109	0	CGCGAGCTCAAUTGGCTCGCGGGAACGCGAGCCAGTTGAGCTCGCGACACTCTTTCCCTTTTTTTTTT	46138.5
UDG_UG_f1CA_f2CCC	29748	54609	55739	0	CGCGAGCTCCAUCCCCTCGCGGGAACGCGAGGGGGTGGAGCTCGCGACACTCTTTCCCTTTTTTTTTT	57011
UDG_UG_f1GT_f2CCC	28909	52705	54243	0	CGCGAGCTCGTUCCCCTCGCGGGAACGCGAGGGGGACGAGCTCGCGACACTCTTTCCCTTTTTTTTTT	55447.9
UDG_UG_f1TG_f2TCC	24349	44685	44685	0	CGCGAGCTCTGUTCCCTCGCGGGAACGCGAGGGAGCAGAGCTCGCGACACTCTTTCCCTTTTTTTTTT	45526.9
UDG_UG_f1CT_f2ATC	24883	45443	45443	0	CGCGAGCTCCTUATCCTCGCGGGAACGCGAGGATGAGGAGCTCGCGACACTCTTTCCCTTTTTTTTTT	46295.2
UDG_UG_f1GC_f2TAA	23790	43564	43564	0	CGCGAGCTCGCUTAACTCGCGGGAACGCGAGTTAGGCGAGCTCGCGACACTCTTTCCCTTTTTTTTTT	44154.9
UDG_UG_f1TG_f2CAG	24390	44527	44527	0	CGCGAGCTCTGUCAGCTCGCGGGAACGCGAGCTGGCAGAGCTCGCGACACTCTTTCCCTTTTTTTTTT	45263.4
UDG_UG_f1CA_f2GCG	28321	51717	53194	0	CGCGAGCTCCAUGCGCTCGCGGGAACGCGAGCGCGTGGAGCTCGCGACACTCTTTCCCTTTTTTTTTT	54191.6
UDG_UG_f1TA_f2TCC	25536	46663	46663	0	CGCGAGCTCTAUTCCCTCGCGGGAACGCGAGGGAGTAGAGCTCGCGACACTCTTTCCCTTTTTTTTTT	47564.3
UDG_UG_f1AC_f2ATG	25264	46191	46191	0	CGCGAGCTCACUATGCTCGCGGGAACGCGAGCATGGTGAGCTCGCGACACTCTTTCCCTTTTTTTTTT	47401.2
UDG_UG_f1AT_f2GAT	25193	46118	46118	0	CGCGAGCTCATUGATCTCGCGGGAACGCGAGATCGATGAGCTCGCGACACTCTTTCCCTTTTTTTTTT	47587.9
UDG_UG_f1GC_f2TAT	23638	43363	43363	0	CGCGAGCTCGCUTATCTCGCGGGAACGCGAGATAGGCGAGCTCGCGACACTCTTTCCCTTTTTTTTTT	44783.5
UDG_UG_f1TC_f2TGT	23032	42026	42026	0	CGCGAGCTCTCUTGTCTCGCGGGAACGCGAGACAGGAGAGCTCGCGACACTCTTTCCCTTTTTTTTTT	43763.1
UDG_UG_f1CC_f2CTA	27340	50008	51445	0	CGCGAGCTCCCUCTACTCGCGGGAACGCGAGTAGGGGGAGCTCGCGACACTCTTTCCCTTTTTTTTTT	53971.7
UDG_UG_f1TC_f2CGG	24966	45705	45705	0	CGCGAGCTCTCUCGGCTCGCGGGAACGCGAGCCGGGAGAGCTCGCGACACTCTTTCCCTTTTTTTTTT	47949.8
UDG_UG_f1AG_f2CCG	28308	51599	53171	0	CGCGAGCTCAGUCCGCTCGCGGGAACGCGAGCGGGCTGAGCTCGCGACACTCTTTCCCTTTTTTTTTT	55782.5
UDG_UG_f1CG_f2GCA	28330	51921	53210	0	CGCGAGCTCCGUGCACTCGCGGGAACGCGAGTGCGCGGAGCTCGCGACACTCTTTCCCTTTTTTTTTT	55823.4
UDG_UG_f1TC_f2GTA	24325	44810	44810	0	CGCGAGCTCTCUGTACTCGCGGGAACGCGAGTACGGAGAGCTCGCGACACTCTTTCCCTTTTTTTTTT	47010.8
UDG_random_6b_4	12176	22320	22320	0	CGCGAGCTCTCACGCCTCGCGGGAACGCGAGGCGTGAGAGCTCGCGACACTCTTTCCCTTTTTTTTTT	23416.2
UDG_UG_f1TT_f2CGT	20677	38153	38153	0	CGCGAGCTCTTUCGTCTCGCGGGAACGCGAGACGGAAGAGCTCGCGACACTCTTTCCCTTTTTTTTTT	40026.9
UDG_UG_f1AC_f2TTC	22538	41261	41261	0	CGCGAGCTCACUTTCCTCGCGGGAACGCGAGGAAGGTGAGCTCGCGACACTCTTTCCCTTTTTTTTTT	43287.5
UDG_UG_f1AA_f2TTG	28125	51307	52844	0	CGCGAGCTCAAUTTGCTCGCGGGAACGCGAGCAAGTTGAGCTCGCGACACTCTTTCCCTTTTTTTTTT	54397.7
UDG_UG_f1CA_f2GCT	29063	52994	54517	0	CGCGAGCTCCAUGCTCTCGCGGGAACGCGAGAGCGTGGAGCTCGCGACACTCTTTCCCTTTTTTTTTT	56119.9
UDG_UG_f1AA_f2CCC	29965	54925	56126	0	CGCGAGCTCAAUCCCCTCGCGGGAACGCGAGGGGGTTGAGCTCGCGACACTCTTTCCCTTTTTTTTTT	57776.2
UDG_UG_f1CA_f2GCA	29375	53956	55074	0	CGCGAGCTCCAUGCACTCGCGGGAACGCGAGTGCGTGGAGCTCGCGACACTCTTTCCCTTTTTTTTTT	56693.3
UDG_UG_f1CA_f2CAA	25374	46811	46811	0	CGCGAGCTCCAUCAACTCGCGGGAACGCGAGTTGGTGGAGCTCGCGACACTCTTTCCCTTTTTTTTTT	48187.4
UDG_UG_f1CC_f2ATC	26485	48626	48626	0	CGCGAGCTCCCUATCCTCGCGGGAACGCGAGGATGGGGAGCTCGCGACACTCTTTCCCTTTTTTTTTT	50055.7
UDG_UG_f1GG_f2GTA	26688	48595	48595	0	CGCGAGCTCGGUGTACTCGCGGGAACGCGAGTACGCCGAGCTCGCGACACTCTTTCCCTTTTTTTTTT	50023.8
UDG_UG_f1GA_f2TAT	24872	45847	45847	0	CGCGAGCTCGAUTATCTCGCGGGAACGCGAGATAGTCGAGCTCGCGACACTCTTTCCCTTTTTTTTTT	47195
UDG_UG_f1CG_f2GTT	27650	50680	51997	0	CGCGAGCTCCGUGTTCTCGCGGGAACGCGAGAACGCGGAGCTCGCGACACTCTTTCCCTTTTTTTTTT	53891
UDG_UG_f1TC_f2GCT	24108	44235	44235	0	CGCGAGCTCTCUGCTCTCGCGGGAACGCGAGAGCGGAGAGCTCGCGACACTCTTTCCCTTTTTTTTTT	45949.1
UDG_UG_f1GC_f2AAC	25232	45952	45952	0	CGCGAGCTCGCUAACCTCGCGGGAACGCGAGGTTGGCGAGCTCGCGACACTCTTTCCCTTTTTTTTTT	47928
UDG_UG_f1TT_f2CGA	23807	43713	43713	0	CGCGAGCTCTTUCGACTCGCGGGAACGCGAGTCGGAAGAGCTCGCGACACTCTTTCCCTTTTTTTTTT	45811
UDG_UG_f1CC_f2CTA	26717	49171	49171	0	CGCGAGCTCCCUCTACTCGCGGGAACGCGAGTAGGGGGAGCTCGCGACACTCTTTCCCTTTTTTTTTT	51649
UDG_UG_f1CG_f2CCA	30655	56028	57356	0	CGCGAGCTCCGUCCACTCGCGGGAACGCGAGTGGGCGGAGCTCGCGACACTCTTTCCCTTTTTTTTTT	60166.5
UDG_UG_f1CA_f2TCA	24783	45554	45554	0	CGCGAGCTCCAUTCACTCGCGGGAACGCGAGTGAGTGGAGCTCGCGACACTCTTTCCCTTTTTTTTTT	47786.2
UDG_UG_f1CA_f2ACG	25378	46559	46559	0	CGCGAGCTCCAUACGCTCGCGGGAACGCGAGCGTGTGGAGCTCGCGACACTCTTTCCCTTTTTTTTTT	48757.6
UDG_UG_f1GA_f2GCG	27947	51249	52527	0	CGCGAGCTCGAUGCGCTCGCGGGAACGCGAGCGCGTCGAGCTCGCGACACTCTTTCCCTTTTTTTTTT	55048.1
UDG_UG_f1AT_f2CAA	24727	45467	45467	0	CGCGAGCTCATUCAACTCGCGGGAACGCGAGTTGGATGAGCTCGCGACACTCTTTCCCTTTTTTTTTT	47649.2
UDG_random_6b_6	10347	19070	19070	0	CGCGAGCTCCTACGACTCGCGGGAACGCGAGTCGTAGGAGCTCGCGACACTCTTTCCCTTTTTTTTTT	19819.7
UDG_UG_f1CG_f2GTC	29345	53941	55020	0	CGCGAGCTCCGUGTCCTCGCGGGAACGCGAGGACGCGGAGCTCGCGACACTCTTTCCCTTTTTTTTTT	56862.6
UDG_UG_f1TG_f2GAG	21820	39964	39964	0	CGCGAGCTCTGUGAGCTCGCGGGAACGCGAGCTCGCAGAGCTCGCGACACTCTTTCCCTTTTTTTTTT	41387.6
UDG_MM_GG	8696	15876	15876	0	CGCGAGCTCACGCTTACCGCGGGAACGCGGTAAGGGTGAGCTCGCGACACTCTTTCCCTTTTTTTTTT	16407.7
UDG_UG_f1AC_f2CCG	26717	48968	48968	0	CGCGAGCTCACUCCGCTCGCGGGAACGCGAGCGGGGTGAGCTCGCGACACTCTTTCCCTTTTTTTTTT	50563.4
UDG_UG_f1GT_f2ATG	24229	44477	44477	0	CGCGAGCTCGTUATGCTCGCGGGAACGCGAGCATGACGAGCTCGCGACACTCTTTCCCTTTTTTTTTT	45941.9
UDG_UG_f1AT_f2GAA	24426	44735	44735	0	CGCGAGCTCATUGAACTCGCGGGAACGCGAGTTCGATGAGCTCGCGACACTCTTTCCCTTTTTTTTTT	46169.7
UDG_UG_f1GA_f2CGC	29771	54842	55780	0	CGCGAGCTCGAUCGCCTCGCGGGAACGCGAGGCGGTCGAGCTCGCGACACTCTTTCCCTTTTTTTTTT	57683.9
UDG_UG_f1TC_f2GTT	26294	48125	48125	0	CGCGAGCTCTCUGTTCTCGCGGGAACGCGAGAACGGAGAGCTCGCGACACTCTTTCCCTTTTTTTTTT	49767.6
UDG_UG_f1AG_f2GAC	27419	49916	49916	0	CGCGAGCTCAGUGACCTCGCGGGAACGCGAGGTCGCTGAGCTCGCGACACTCTTTCCCTTTTTTTTTT	51720.8
UDG_UG_f1TC_f2GAG	23488	42878	42878	0	CGCGAGCTCTCUGAGCTCGCGGGAACGCGAGCTCGGAGAGCTCGCGACACTCTTTCCCTTTTTTTTTT	44428.4
UDG_UG_f1GT_f2TAG	21354	39040	39040	0	CGCGAGCTCGTUTAGCTCGCGGGAACGCGAGCTAGACGAGCTCGCGACACTCTTTCCCTTTTTTTTTT	40430.7
UDG_UG_f1CG_f2TGG	22746	41719	41719	0	CGCGAGCTCCGUTGGCTCGCGGGAACGCGAGCCAGCGGAGCTCGCGACACTCTTTCCCTTTTTTTTTT	43184.7
UDG_UG_f1GG_f2TGC	26870	49246	49246	0	CGCGAGCTCGGUTGCCTCGCGGGAACGCGAGGCAGCCGAGCTCGCGACACTCTTTCCCTTTTTTTTTT	51026.6
UDG_UG_f1TG_f2TGT	23280	42711	42711	0	CGCGAGCTCTGUTGTCTCGCGGGAACGCGAGACAGCAGAGCTCGCGACACTCTTTCCCTTTTTTTTTT	44211.6
UDG_UG_f1TT_f2TAG	20668	37886	37886	0	CGCGAGCTCTTUTAGCTCGCGGGAACGCGAGCTAGAAGAGCTCGCGACACTCTTTCCCTTTTTTTTTT	39327.8
UDG_UG_f1TG_f2AAA	23755	43647	43647	0	CGCGAGCTCTGUAAACTCGCGGGAACGCGAGTTTGCAGAGCTCGCGACACTCTTTCCCTTTTTTTTTT	45460.9
UDG_UG_f1TG_f2AAC	24123	44450	44450	0	CGCGAGCTCTGUAACCTCGCGGGAACGCGAGGTTGCAGAGCTCGCGACACTCTTTCCCTTTTTTTTTT	46372.5
UDG_UG_f1GT_f2TTG	22974	42091	42091	0	CGCGAGCTCGTUTTGCTCGCGGGAACGCGAGCAAGACGAGCTCGCGACACTCTTTCCCTTTTTTTTTT	44065.2
UDG_UG_f1AA_f2GCG	28655	52524	53790	0	CGCGAGCTCAAUGCGCTCGCGGGAACGCGAGCGCGTTGAGCTCGCGACACTCTTTCCCTTTTTTTTTT	56312.9
UDG_UG_f1GT_f2TAA	22702	41782	41782	0	CGCGAGCTCGTUTAACTCGCGGGAACGCGAGTTAGACGAGCTCGCGACACTCTTTCCCTTTTTTTTTT	43518.4
UDG_UG_f1TT_f2GCA	24315	44555	44555	0	CGCGAGCTCTTUGCACTCGCGGGAACGCGAGTGCGAAGAGCTCGCGACACTCTTTCCCTTTTTTTTTT	46406.6
UDG_UG_f1CT_f2AGC	24876	45555	45555	0	CGCGAGCTCCTUAGCCTCGCGGGAACGCGAGGCTGAGGAGCTCGCGACACTCTTTCCCTTTTTTTTTT	47384.7
UDG_UG_f1AT_f2TTG	23344	42632	42632	0	CGCGAGCTCATUTTGCTCGCGGGAACGCGAGCAAGATGAGCTCGCGACACTCTTTCCCTTTTTTTTTT	44238.2
UDG_UG_f1GA_f2CCC	30435	55857	56964	0	CGCGAGCTCGAUCCCCTCGCGGGAACGCGAGGGGGTCGAGCTCGCGACACTCTTTCCCTTTTTTTTTT	59018.6
UDG_UG_f1TC_f2GGA	24901	45677	45677	0	CGCGAGCTCTCUGGACTCGCGGGAACGCGAGTCCGGAGAGCTCGCGACACTCTTTCCCTTTTTTTTTT	47198.6
UDG_UG_f1GA_f2CCG	28968	53185	54348	0	CGCGAGCTCGAUCCGCTCGCGGGAACGCGAGCGGGTCGAGCTCGCGACACTCTTTCCCTTTTTTTTTT	56491.8
UDG_UG_f1TG_f2TGC	25064	45863	45863	0	CGCGAGCTCTGUTGCCTCGCGGGAACGCGAGGCAGCAGAGCTCGCGACACTCTTTCCCTTTTTTTTTT	47609.4
UDG_UG_f1TC_f2GGC	26989	49198	49198	0	CGCGAGCTCTCUGGCCTCGCGGGAACGCGAGGCCGGAGAGCTCGCGACACTCTTTCCCTTTTTTTTTT	50836.9
UDG_UG_f1AT_f2CTA	25272	46409	46409	0	CGCGAGCTCATUCTACTCGCGGGAACGCGAGTAGGATGAGCTCGCGACACTCTTTCCCTTTTTTTTTT	48057.1
UDG_random_6b_2	10177	18635	18635	0	CGCGAGCTCCCTGTTCTCGCGGGAACGCGAGAACAGGGAGCTCGCGACACTCTTTCCCTTTTTTTTTT	19195.2
UDG_UG_f1AC_f2AAA	25111	45725	45725	0	CGCGAGCTCACUAAACTCGCGGGAACGCGAGTTTGGTGAGCTCGCGACACTCTTTCCCTTTTTTTTTT	47099.6
UDG_UG_f1GT_f2ATA	24592	45008	45008	0	CGCGAGCTCGTUATACTCGCGGGAACGCGAGTATGACGAGCTCGCGACACTCTTTCCCTTTTTTTTTT	46222.7
UDG_UG_f1CT_f2TCG	22755	41787	41787	0	CGCGAGCTCCTUTCGCTCGCGGGAACGCGAGCGAGAGGAGCTCGCGACACTCTTTCCCTTTTTTTTTT	42843.5
UDG_UG_f1GT_f2GTT	26126	47798	47798	0	CGCGAGCTCGTUGTTCTCGCGGGAACGCGAGAACGACGAGCTCGCGACACTCTTTCCCTTTTTTTTTT	49088
UDG_UG_f1AG_f2TGC	26049	47653	47653	0	CGCGAGCTCAGUTGCCTCGCGGGAACGCGAGGCAGCTGAGCTCGCGACACTCTTTCCCTTTTTTTTTT	49146.6
UDG_UG_f1CC_f2CCG	28187	51646	52955	0	CGCGAGCTCCCUCCGCTCGCGGGAACGCGAGCGGGGGGAGCTCGCGACACTCTTTCCCTTTTTTTTTT	54541.1
UDG_UG_f1CA_f2AGC	26336	48151	48151	0	CGCGAGCTCCAUAGCCTCGCGGGAACGCGAGGCTGTGGAGCTCGCGACACTCTTTCCCTTTTTTTTTT	49450.5
UDG_UG_f1GG_f2TTG	25525	46637	46637	0	CGCGAGCTCGGUTTGCTCGCGGGAACGCGAGCAAGCCGAGCTCGCGACACTCTTTCCCTTTTTTTTTT	47895.6
UDG_UG_f1AG_f2CGC	29787	54742	55808	0	CGCGAGCTCAGUCGCCTCGCGGGAACGCGAGGCGGCTGAGCTCGCGACACTCTTTCCCTTTTTTTTTT	57048.9
UDG_UG_f1AA_f2GAA	26378	48356	48356	0	CGCGAGCTCAAUGAACTCGCGGGAACGCGAGTTCGTTGAGCTCGCGACACTCTTTCCCTTTTTTTTTT	49387.2
UDG_UG_f1TC_f2GGG	24819	45481	45481	0	CGCGAGCTCTCUGGGCTCGCGGGAACGCGAGCCCGGAGAGCTCGCGACACTCTTTCCCTTTTTTTTTT	46337.9
UDG_UG_f1CA_f2GAT	26276	48257	48257	0	CGCGAGCTCCAUGATCTCGCGGGAACGCGAGATCGTGGAGCTCGCGACACTCTTTCCCTTTTTTTTTT	49330
UDG_UG_f1AT_f2GTA	26149	47888	47888	0	CGCGAGCTCATUGTACTCGCGGGAACGCGAGTACGATGAGCTCGCGACACTCTTTCCCTTTTTTTTTT	49178.3
UDG_UG_f1TG_f2GAT	24461	44715	44715	0	CGCGAGCTCTGUGATCTCGCGGGAACGCGAGATCGCAGAGCTCGCGACACTCTTTCCCTTTTTTTTTT	45938.4
UDG_UG_f1TT_f2CCT	24444	44705	44705	0	CGCGAGCTCTTUCCTCTCGCGGGAACGCGAGAGGGAAGAGCTCGCGACACTCTTTCCCTTTTTTTTTT	46129.9
UDG_UG_f1CA_f2CAG	26785	48906	48906	0	CGCGAGCTCCAUCAGCTCGCGGGAACGCGAGCTGGTGGAGCTCGCGACACTCTTTCCCTTTTTTTTTT	50504.8
UDG_UG_f1CT_f2TAC	23841	43608	43608	0	CGCGAGCTCCTUTACCTCGCGGGAACGCGAGGTAGAGGAGCTCGCGACACTCTTTCCCTTTTTTTTTT	45408.5
UDG_MM_TG	8130	14947	14947	0	CGCGAGCTCACTCTTACCGCGGGAACGCGGTAAGGGTGAGCTCGCGACACTCTTTCCCTTTTTTTTTT	15679.4
UDG_UG_f1GA_f2TAG	24874	45675	45675	0	CGCGAGCTCGAUTAGCTCGCGGGAACGCGAGCTAGTCGAGCTCGCGACACTCTTTCCCTTTTTTTTTT	48157.5
UDG_UG_f1AA_f2GCA	28502	52396	53517	0	CGCGAGCTCAAUGCACTCGCGGGAACGCGAGTGCGTTGAGCTCGCGACACTCTTTCCCTTTTTTTTTT	56425.7
UDG_UG_f1TT_f2CTT	24250	44576	44576	0	CGCGAGCTCTTUCTTCTCGCGGGAACGCGAGAAGGAAGAGCTCGCGACACTCTTTCCCTTTTTTTTTT	46998.8
UDG_UG_f1AC_f2GCC	26960	49408	49408	0	CGCGAGCTCACUGCCCTCGCGGGAACGCGAGGGCGGTGAGCTCGCGACACTCTTTCCCTTTTTTTTTT	52093.4
UDG_UG_f1CT_f2ACA	23058	42372	42372	0	CGCGAGCTCCTUACACTCGCGGGAACGCGAGTGTGAGGAGCTCGCGACACTCTTTCCCTTTTTTTTTT	44675
UDG_UG_f1GT_f2CTT	22730	41982	41982	0	CGCGAGCTCGTUCTTCTCGCGGGAACGCGAGAAGGACGAGCTCGCGACACTCTTTCCCTTTTTTTTTT	44263.8
UDG_UG_f1TA_f2GAA	20976	38454	38454	0	CGCGAGCTCTAUGAACTCGCGGGAACGCGAGTTCGTAGAGCTCGCGACACTCTTTCCCTTTTTTTTTT	40544
UDG_UG_f1TA_f2TAC	22345	40975	40975	0	CGCGAGCTCTAUTACCTCGCGGGAACGCGAGGTAGTAGAGCTCGCGACACTCTTTCCCTTTTTTTTTT	43202
UDG_UG_f1GA_f2TTA	28158	51250	52903	0	CGCGAGCTCGAUTTACTCGCGGGAACGCGAGTAAGTCGAGCTCGCGACACTCTTTCCCTTTTTTTTTT	54458.5
UDG_UG_f1GT_f2AAA	25562	46782	46782	0	CGCGAGCTCGTUAAACTCGCGGGAACGCGAGTTTGACGAGCTCGCGACACTCTTTCCCTTTTTTTTTT	48157.5
UDG_UG_f1AA_f2GGC	30960	56785	57900	0	CGCGAGCTCAAUGGCCTCGCGGGAACGCGAGGCCGTTGAGCTCGCGACACTCTTTCCCTTTTTTTTTT	59602.4
UDG_UG_f1AG_f2TGT	25505	46179	46179	0	CGCGAGCTCAGUTGTCTCGCGGGAACGCGAGACAGCTGAGCTCGCGACACTCTTTCCCTTTTTTTTTT	47536.8
UDG_UG_f1TT_f2AAT	24828	45213	45213	0	CGCGAGCTCTTUAATCTCGCGGGAACGCGAGATTGAAGAGCTCGCGACACTCTTTCCCTTTTTTTTTT	46542.4
UDG_UG_f1AA_f2TTA	26471	48039	48039	0	CGCGAGCTCAAUTTACTCGCGGGAACGCGAGTAAGTTGAGCTCGCGACACTCTTTCCCTTTTTTTTTT	49451.5
UDG_UG_f1GA_f2ATT	26533	48524	48524	0	CGCGAGCTCGAUATTCTCGCGGGAACGCGAGAATGTCGAGCTCGCGACACTCTTTCCCTTTTTTTTTT	49950.7
UDG_UG_f1AT_f2TCG	21814	40010	40010	0	CGCGAGCTCATUTCGCTCGCGGGAACGCGAGCGAGATGAGCTCGCGACACTCTTTCCCTTTTTTTTTT	41186.4
UDG_UG_f1CT_f2CCA	26032	47595	47595	0	CGCGAGCTCCTUCCACTCGCGGGAACGCGAGTGGGAGGAGCTCGCGACACTCTTTCCCTTTTTTTTTT	49328.7
UDG_UG_f1GC_f2CTA	25550	46955	46955	0	CGCGAGCTCGCUCTACTCGCGGGAACGCGAGTAGGGCGAGCTCGCGACACTCTTTCCCTTTTTTTTTT	48774.5
UDG_UG_f1AG_f2TTT	21962	40236	40236	0	CGCGAGCTCAGUTTTCTCGCGGGAACGCGAGAAAGCTGAGCTCGCGACACTCTTTCCCTTTTTTTTTT	41973.5
UDG_UG_f1TG_f2ATG	21752	39956	39956	0	CGCGAGCTCTGUATGCTCGCGGGAACGCGAGCATGCAGAGCTCGCGACACTCTTTCCCTTTTTTTTTT	41969.6
UDG_UG_random_5U	36653	65535	68053	0	CGCGCGAGUUAACUUUGCGCGGGAACGCGCGGGGTTGGCTCGCGCGACACTCTTTCCCTTTTTTTTTT	71682.7
UDG_UG_f1CT_f2TAG	21227	38981	38981	0	CGCGAGCTCCTUTAGCTCGCGGGAACGCGAGCTAGAGGAGCTCGCGACACTCTTTCCCTTTTTTTTTT	40861.7
UDG_UG_f1GG_f2TCA	25623	46896	46896	0	CGCGAGCTCGGUTCACTCGCGGGAACGCGAGTGAGCCGAGCTCGCGACACTCTTTCCCTTTTTTTTTT	49158.6
UDG_UG_f1CC_f2CAC	26792	49400	49400	0	CGCGAGCTCCCUCACCTCGCGGGAACGCGAGGTGGGGGAGCTCGCGACACTCTTTCCCTTTTTTTTTT	51524.3
UDG_MM_CA	7944	14466	14466	0	CGCGAGCTCACCCTTACCGCGGGAACGCGGTAAGAGTGAGCTCGCGACACTCTTTCCCTTTTTTTTTT	15126.1
UDG_UG_f1CG_f2CGC	29738	54441	55721	0	CGCGAGCTCCGUCGCCTCGCGGGAACGCGAGGCGGCGGAGCTCGCGACACTCTTTCCCTTTTTTTTTT	58263.5
UDG_UG_f1TC_f2TCC	22378	40854	40854	0	CGCGAGCTCTCUTCCCTCGCGGGAACGCGAGGGAGGAGAGCTCGCGACACTCTTTCCCTTTTTTTTTT	42411.5
UDG_UG_f1TT_f2TTA	22906	42110	42110	0	CGCGAGCTCTTUTTACTCGCGGGAACGCGAGTAAGAAGAGCTCGCGACACTCTTTCCCTTTTTTTTTT	43520.2
UDG_UG_f1GA_f2CCG	27887	51230	52420	0	CGCGAGCTCGAUCCGCTCGCGGGAACGCGAGCGGGTCGAGCTCGCGACACTCTTTCCCTTTTTTTTTT	54261.7
UDG_UG_f1TA_f2GAG	22658	41580	41580	0	CGCGAGCTCTAUGAGCTCGCGGGAACGCGAGCTCGTAGAGCTCGCGACACTCTTTCCCTTTTTTTTTT	42949.4
UDG_UG_f1TT_f2TCA	22672	41539	41539	0	CGCGAGCTCTTUTCACTCGCGGGAACGCGAGTGAGAAGAGCTCGCGACACTCTTTCCCTTTTTTTTTT	42892.4
UDG_UG_f1GA_f2CCC	30395	55525	56893	0	CGCGAGCTCGAUCCCCTCGCGGGAACGCGAGGGGGTCGAGCTCGCGACACTCTTTCCCTTTTTTTTTT	58766.8
UDG_UG_f1CA_f2CAC	27585	50517	51881	0	CGCGAGCTCCAUCACCTCGCGGGAACGCGAGGTGGTGGAGCTCGCGACACTCTTTCCCTTTTTTTTTT	53589.7
UDG_UG_f1CG_f2TGC	26695	49065	49065	0	CGCGAGCTCCGUTGCCTCGCGGGAACGCGAGGCAGCGGAGCTCGCGACACTCTTTCCCTTTTTTTTTT	50812.8
UDG_UG_f1TA_f2CGA	24363	44667	44667	0	CGCGAGCTCTAUCGACTCGCGGGAACGCGAGTCGGTAGAGCTCGCGACACTCTTTCCCTTTTTTTTTT	46282.1
UDG_UG_f1TA_f2AGT	25393	46523	46523	0	CGCGAGCTCTAUAGTCTCGCGGGAACGCGAGACTGTAGAGCTCGCGACACTCTTTCCCTTTTTTTTTT	48351.9
UDG_UG_f1AA_f2CCT	27110	49662	49662	0	CGCGAGCTCAAUCCTCTCGCGGGAACGCGAGAGGGTTGAGCTCGCGACACTCTTTCCCTTTTTTTTTT	51614.2
UDG_UG_f1AC_f2AGA	24425	44787	44787	0	CGCGAGCTCACUAGACTCGCGGGAACGCGAGTCTGGTGAGCTCGCGACACTCTTTCCCTTTTTTTTTT	46406.4
UDG_UG_f1AG_f2GCG	26052	47530	47530	0	CGCGAGCTCAGUGCGCTCGCGGGAACGCGAGCGCGCTGAGCTCGCGACACTCTTTCCCTTTTTTTTTT	49223.2
UDG_UG_random_6U	53965	65535	98927	0	CGCGUCUCUUTUACUCCCGCGGGAACGCGGGGGTGAGGGGGGCGCGACACTCTTTCCCTTTTTTTTTT	102692
UDG_UG_f1TC_f2TGC	22293	40964	40964	0	CGCGAGCTCTCUTGCCTCGCGGGAACGCGAGGCAGGAGAGCTCGCGACACTCTTTCCCTTTTTTTTTT	42445.2
UDG_UG_f1CA_f2CCC	28256	51862	53078	0	CGCGAGCTCCAUCCCCTCGCGGGAACGCGAGGGGGTGGAGCTCGCGACACTCTTTCCCTTTTTTTTTT	55373.7
UDG_UG_f1AC_f2GGA	25268	46236	46236	0	CGCGAGCTCACUGGACTCGCGGGAACGCGAGTCCGGTGAGCTCGCGACACTCTTTCCCTTTTTTTTTT	48306.9
UDG_UG_f1CG_f2ACT	25903	47532	47532	0	CGCGAGCTCCGUACTCTCGCGGGAACGCGAGAGTGCGGAGCTCGCGACACTCTTTCCCTTTTTTTTTT	49750.5
UDG_UG_f1AT_f2AAC	23694	43551	43551	0	CGCGAGCTCATUAACCTCGCGGGAACGCGAGGTTGATGAGCTCGCGACACTCTTTCCCTTTTTTTTTT	45739.8
UDG_UG_f1GT_f2CAC	27760	50712	52194	0	CGCGAGCTCGTUCACCTCGCGGGAACGCGAGGTGGACGAGCTCGCGACACTCTTTCCCTTTTTTTTTT	54630.1
UDG_UG_f1TC_f2GAA	23792	43629	43629	0	CGCGAGCTCTCUGAACTCGCGGGAACGCGAGTTCGGAGAGCTCGCGACACTCTTTCCCTTTTTTTTTT	45442.2
UDG_UG_f1CG_f2ACT	26935	49493	49493	0	CGCGAGCTCCGUACTCTCGCGGGAACGCGAGAGTGCGGAGCTCGCGACACTCTTTCCCTTTTTTTTTT	51489.7
UDG_UG_f1AA_f2AGG	26521	48548	48548	0	CGCGAGCTCAAUAGGCTCGCGGGAACGCGAGCCTGTTGAGCTCGCGACACTCTTTCCCTTTTTTTTTT	50377.1
UDG_UG_f1AA_f2TCT	27621	50790	51946	0	CGCGAGCTCAAUTCTCTCGCGGGAACGCGAGAGAGTTGAGCTCGCGACACTCTTTCCCTTTTTTTTTT	53609.7
UDG_UG_f1GG_f2TGG	23844	43683	43683	0	CGCGAGCTCGGUTGGCTCGCGGGAACGCGAGCCAGCCGAGCTCGCGACACTCTTTCCCTTTTTTTTTT	45010.7
UDG_UG_f1TT_f2TAC	22436	41181	41181	0	CGCGAGCTCTTUTACCTCGCGGGAACGCGAGGTAGAAGAGCTCGCGACACTCTTTCCCTTTTTTTTTT	42499.9
UDG_UG_f1GG_f2CGG	27422	50197	51591	0	CGCGAGCTCGGUCGGCTCGCGGGAACGCGAGCCGGCCGAGCTCGCGACACTCTTTCCCTTTTTTTTTT	53555.5
UDG_UG_f1AA_f2AGA	26697	48699	48699	0	CGCGAGCTCAAUAGACTCGCGGGAACGCGAGTCTGTTGAGCTCGCGACACTCTTTCCCTTTTTTTTTT	50541.4
UDG_UG_f1AC_f2CGA	25649	47051	47051	0	CGCGAGCTCACUCGACTCGCGGGAACGCGAGTCGGGTGAGCTCGCGACACTCTTTCCCTTTTTTTTTT	48618.4
UDG_UG_f1TA_f2TGC	24743	45332	45332	0	CGCGAGCTCTAUTGCCTCGCGGGAACGCGAGGCAGTAGAGCTCGCGACACTCTTTCCCTTTTTTTTTT	46842.1
UDG_UG_f1CG_f2GCG	26657	49024	49024	0	CGCGAGCTCCGUGCGCTCGCGGGAACGCGAGCGCGCGGAGCTCGCGACACTCTTTCCCTTTTTTTTTT	50347
UDG_UG_f1GA_f2CTC	30555	55804	57178	0	CGCGAGCTCGAUCTCCTCGCGGGAACGCGAGGAGGTCGAGCTCGCGACACTCTTTCCCTTTTTTTTTT	58896.9
UDG_UG_f1GC_f2TGT	24176	44054	44054	0	CGCGAGCTCGCUTGTCTCGCGGGAACGCGAGACAGGCGAGCTCGCGACACTCTTTCCCTTTTTTTTTT	45242.9
UDG_UG_f1AT_f2TAT	24560	44814	44814	0	CGCGAGCTCATUTATCTCGCGGGAACGCGAGATAGATGAGCTCGCGACACTCTTTCCCTTTTTTTTTT	45867.9
UDG_UG_f1TA_f2CGA	25790	47172	47172	0	CGCGAGCTCTAUCGACTCGCGGGAACGCGAGTCGGTAGAGCTCGCGACACTCTTTCCCTTTTTTTTTT	48584.9
UDG_UG_f1AC_f2ATA	25380	46447	46447	0	CGCGAGCTCACUATACTCGCGGGAACGCGAGTATGGTGAGCTCGCGACACTCTTTCCCTTTTTTTTTT	47927.4
UDG_UG_f1AG_f2GCC	27624	50176	51951	0	CGCGAGCTCAGUGCCCTCGCGGGAACGCGAGGGCGCTGAGCTCGCGACACTCTTTCCCTTTTTTTTTT	53530
UDG_UG_f1GA_f2TAA	26578	48764	48764	0	CGCGAGCTCGAUTAACTCGCGGGAACGCGAGTTAGTCGAGCTCGCGACACTCTTTCCCTTTTTTTTTT	50230
UDG_UG_f1CA_f2GGC	29525	54021	55341	0	CGCGAGCTCCAUGGCCTCGCGGGAACGCGAGGCCGTGGAGCTCGCGACACTCTTTCCCTTTTTTTTTT	57075.5
UDG_UG_f1CT_f2CAA	25242	46229	46229	0	CGCGAGCTCCTUCAACTCGCGGGAACGCGAGTTGGAGGAGCTCGCGACACTCTTTCCCTTTTTTTTTT	47335.3
UDG_UG_f1GA_f2CAT	28606	52398	53702	0	CGCGAGCTCGAUCATCTCGCGGGAACGCGAGATGGTCGAGCTCGCGACACTCTTTCCCTTTTTTTTTT	54894.9
UDG_UG_f1TA_f2GAG	23361	42827	42827	0	CGCGAGCTCTAUGAGCTCGCGGGAACGCGAGCTCGTAGAGCTCGCGACACTCTTTCCCTTTTTTTTTT	43721.7
UDG_UG_f1AG_f2ACA	26139	47446	47446	0	CGCGAGCTCAGUACACTCGCGGGAACGCGAGTGTGCTGAGCTCGCGACACTCTTTCCCTTTTTTTTTT	48689.1
UDG_UG_f1GC_f2CGT	27716	50837	52115	0	CGCGAGCTCGCUCGTCTCGCGGGAACGCGAGACGGGCGAGCTCGCGACACTCTTTCCCTTTTTTTTTT	53668
UDG_UG_f1AT_f2GTC	25812	47245	47245	0	CGCGAGCTCATUGTCCTCGCGGGAACGCGAGGACGATGAGCTCGCGACACTCTTTCCCTTTTTTTTTT	48750.8
UDG_UG_f1CG_f2GAT	26068	47643	47643	0	CGCGAGCTCCGUGATCTCGCGGGAACGCGAGATCGCGGAGCTCGCGACACTCTTTCCCTTTTTTTTTT	49196.3
UDG_UG_f1AG_f2AGG	25315	46411	46411	0	CGCGAGCTCAGUAGGCTCGCGGGAACGCGAGCCTGCTGAGCTCGCGACACTCTTTCCCTTTTTTTTTT	48171
UDG_UG_f1TA_f2CTC	26675	49005	49005	0	CGCGAGCTCTAUCTCCTCGCGGGAACGCGAGGAGGTAGAGCTCGCGACACTCTTTCCCTTTTTTTTTT	51173.3
UDG_UG_f1AC_f2GGG	25262	46115	46115	0	CGCGAGCTCACUGGGCTCGCGGGAACGCGAGCCCGGTGAGCTCGCGACACTCTTTCCCTTTTTTTTTT	48589.5
UDG_UG_f1TG_f2ATA	24746	45283	45283	0	CGCGAGCTCTGUATACTCGCGGGAACGCGAGTATGCAGAGCTCGCGACACTCTTTCCCTTTTTTTTTT	48103.3
UDG_UG_f1GG_f2TCG	25521	46646	46646	0	CGCGAGCTCGGUTCGCTCGCGGGAACGCGAGCGAGCCGAGCTCGCGACACTCTTTCCCTTTTTTTTTT	49551.2
UDG_UG_f1TG_f2ACG	23972	44055	44055	0	CGCGAGCTCTGUACGCTCGCGGGAACGCGAGCGTGCAGAGCTCGCGACACTCTTTCCCTTTTTTTTTT	46798.8
UDG_UG_f1CG_f2AGC	25213	45903	45903	0	CGCGAGCTCCGUAGCCTCGCGGGAACGCGAGGCTGCGGAGCTCGCGACACTCTTTCCCTTTTTTTTTT	48761.9
UDG_UG_f1TG_f2ACG	21838	40112	40112	0	CGCGAGCTCTGUACGCTCGCGGGAACGCGAGCGTGCAGAGCTCGCGACACTCTTTCCCTTTTTTTTTT	42610.3
UDG_UG_f1GT_f2GGC	22589	41306	41306	0	CGCGAGCTCGTUGGCCTCGCGGGAACGCGAGGCCGACGAGCTCGCGACACTCTTTCCCTTTTTTTTTT	43878.6
UDG_UG_f1AG_f2CGA	23082	42268	42268	0	CGCGAGCTCAGUCGACTCGCGGGAACGCGAGTCGGCTGAGCTCGCGACACTCTTTCCCTTTTTTTTTT	44900.5
UDG_UG_f1TG_f2AGA	21292	38859	38859	0	CGCGAGCTCTGUAGACTCGCGGGAACGCGAGTCTGCAGAGCTCGCGACACTCTTTCCCTTTTTTTTTT	41279.2
UDG_UG_f1CA_f2ATC	29758	54012	55757	0	CGCGAGCTCCAUATCCTCGCGGGAACGCGAGGATGTGGAGCTCGCGACACTCTTTCCCTTTTTTTTTT	57629.2
UDG_UG_f1CT_f2AGG	25256	46149	46149	0	CGCGAGCTCCTUAGGCTCGCGGGAACGCGAGCCTGAGGAGCTCGCGACACTCTTTCCCTTTTTTTTTT	47698.6
UDG_UG_f1CG_f2TCG	25447	46465	46465	0	CGCGAGCTCCGUTCGCTCGCGGGAACGCGAGCGAGCGGAGCTCGCGACACTCTTTCCCTTTTTTTTTT	48025.2
UDG_UG_f1CA_f2CTC	28627	52212	53740	0	CGCGAGCTCCAUCTCCTCGCGGGAACGCGAGGAGGTGGAGCTCGCGACACTCTTTCCCTTTTTTTTTT	55544.5
UDG_UG_f1TC_f2ACC	25370	45994	45994	0	CGCGAGCTCTCUACCCTCGCGGGAACGCGAGGGTGGAGAGCTCGCGACACTCTTTCCCTTTTTTTTTT	47538.4
UDG_UG_f1CA_f2AGT	26186	48024	48024	0	CGCGAGCTCCAUAGTCTCGCGGGAACGCGAGACTGTGGAGCTCGCGACACTCTTTCCCTTTTTTTTTT	49636.6
UDG_UG_f1AA_f2GCT	26386	47843	47843	0	CGCGAGCTCAAUGCTCTCGCGGGAACGCGAGAGCGTTGAGCTCGCGACACTCTTTCCCTTTTTTTTTT	49449.5
UDG_UG_f1TA_f2CCC	25463	46417	46417	0	CGCGAGCTCTAUCCCCTCGCGGGAACGCGAGGGGGTAGAGCTCGCGACACTCTTTCCCTTTTTTTTTT	47975.6
UDG_UG_f1AG_f2GAG	22912	41692	41692	0	CGCGAGCTCAGUGAGCTCGCGGGAACGCGAGCTCGCTGAGCTCGCGACACTCTTTCCCTTTTTTTTTT	43258.1
UDG_UG_f1GA_f2CCG	27395	50060	51543	0	CGCGAGCTCGAUCCGCTCGCGGGAACGCGAGCGGGTCGAGCTCGCGACACTCTTTCCCTTTTTTTTTT	53603.9
UDG_UG_f1AC_f2CGA	22349	40902	40902	0	CGCGAGCTCACUCGACTCGCGGGAACGCGAGTCGGGTGAGCTCGCGACACTCTTTCCCTTTTTTTTTT	42826
UDG_UG_f1AC_f2GGG	22576	42750	42750	0	CGCGAGCTCACUGGGCTCGCGGGAACGCGAGCCCGGTGAGCTCGCGACACTCTTTCCCTTTTTTTTTT	44904.4
UDG_UG_f1CT_f2GAA	21627	39732	39732	0	CGCGAGCTCCTUGAACTCGCGGGAACGCGAGTTCGAGGAGCTCGCGACACTCTTTCCCTTTTTTTTTT	41678.9
UDG_UG_f1GA_f2ACC	26490	48420	48420	0	CGCGAGCTCGAUACCCTCGCGGGAACGCGAGGGTGTCGAGCTCGCGACACTCTTTCCCTTTTTTTTTT	50744
UDG_UG_f1GC_f2CGT	26915	49288	49288	0	CGCGAGCTCGCUCGTCTCGCGGGAACGCGAGACGGGCGAGCTCGCGACACTCTTTCCCTTTTTTTTTT	51653.6
UDG_UG_f1CG_f2AAC	25808	47597	47597	0	CGCGAGCTCCGUAACCTCGCGGGAACGCGAGGTTGCGGAGCTCGCGACACTCTTTCCCTTTTTTTTTT	49636.3
UDG_UG_f1GT_f2GGC	26313	48407	48407	0	CGCGAGCTCGTUGGCCTCGCGGGAACGCGAGGCCGACGAGCTCGCGACACTCTTTCCCTTTTTTTTTT	50488.6
UDG_UG_f1CA_f2TAC	25418	46638	46638	0	CGCGAGCTCCAUTACCTCGCGGGAACGCGAGGTAGTGGAGCTCGCGACACTCTTTCCCTTTTTTTTTT	48643.5
UDG_UG_f1AG_f2GGC	28495	52060	53504	0	CGCGAGCTCAGUGGCCTCGCGGGAACGCGAGGCCGCTGAGCTCGCGACACTCTTTCCCTTTTTTTTTT	55543.7
UDG_UG_f1TA_f2TAC	25395	46597	46597	0	CGCGAGCTCTAUTACCTCGCGGGAACGCGAGGTAGTAGAGCTCGCGACACTCTTTCCCTTTTTTTTTT	48196.8
UDG_UG_f1GT_f2ACG	23649	43488	43488	0	CGCGAGCTCGTUACGCTCGCGGGAACGCGAGCGTGACGAGCTCGCGACACTCTTTCCCTTTTTTTTTT	45015.9
UDG_UG_f1GT_f2ATC	24699	45315	45315	0	CGCGAGCTCGTUATCCTCGCGGGAACGCGAGGATGACGAGCTCGCGACACTCTTTCCCTTTTTTTTTT	46807.5
UDG_UG_f1AC_f2TAG	22527	41369	41369	0	CGCGAGCTCACUTAGCTCGCGGGAACGCGAGCTAGGTGAGCTCGCGACACTCTTTCCCTTTTTTTTTT	42754.4
UDG_UG_f1AT_f2AAC	24383	44941	44941	0	CGCGAGCTCATUAACCTCGCGGGAACGCGAGGTTGATGAGCTCGCGACACTCTTTCCCTTTTTTTTTT	46421.1
UDG_UG_f1CA_f2CTC	28442	52095	53410	0	CGCGAGCTCCAUCTCCTCGCGGGAACGCGAGGAGGTGGAGCTCGCGACACTCTTTCCCTTTTTTTTTT	55198.7
UDG_UG_f1AT_f2ACA	24531	44885	44885	0	CGCGAGCTCATUACACTCGCGGGAACGCGAGTGTGATGAGCTCGCGACACTCTTTCCCTTTTTTTTTT	46593.1
UDG_UG_f1TA_f2CTG	24944	45673	45673	0	CGCGAGCTCTAUCTGCTCGCGGGAACGCGAGCAGGTAGAGCTCGCGACACTCTTTCCCTTTTTTTTTT	47556.7
UDG_UG_f1CG_f2CTC	28784	52700	54020	0	CGCGAGCTCCGUCTCCTCGCGGGAACGCGAGGAGGCGGAGCTCGCGACACTCTTTCCCTTTTTTTTTT	56285.7
UDG_UG_f1TG_f2GTC	27451	50137	51642	0	CGCGAGCTCTGUGTCCTCGCGGGAACGCGAGGACGCAGAGCTCGCGACACTCTTTCCCTTTTTTTTTT	53807.9
UDG_UG_f1GA_f2CGA	26987	49406	49406	0	CGCGAGCTCGAUCGACTCGCGGGAACGCGAGTCGGTCGAGCTCGCGACACTCTTTCCCTTTTTTTTTT	51454.8
UDG_UG_f1AG_f2TTG	23711	43519	43519	0	CGCGAGCTCAGUTTGCTCGCGGGAACGCGAGCAAGCTGAGCTCGCGACACTCTTTCCCTTTTTTTTTT	45313.9
UDG_UG_f1GG_f2TGC	26103	48080	48080	0	CGCGAGCTCGGUTGCCTCGCGGGAACGCGAGGCAGCCGAGCTCGCGACACTCTTTCCCTTTTTTTTTT	50159.5
UDG_UG_f1TT_f2ACG	22201	40687	40687	0	CGCGAGCTCTTUACGCTCGCGGGAACGCGAGCGTGAAGAGCTCGCGACACTCTTTCCCTTTTTTTTTT	42393.5
UDG_UG_f1GG_f2GTA	25018	45456	45456	0	CGCGAGCTCGGUGTACTCGCGGGAACGCGAGTACGCCGAGCTCGCGACACTCTTTCCCTTTTTTTTTT	47588
UDG_UG_f1GC_f2GTT	26432	48643	48643	0	CGCGAGCTCGCUGTTCTCGCGGGAACGCGAGAACGGCGAGCTCGCGACACTCTTTCCCTTTTTTTTTT	50986.5
UDG_UG_f1TC_f2AGA	23092	42341	42341	0	CGCGAGCTCTCUAGACTCGCGGGAACGCGAGTCTGGAGAGCTCGCGACACTCTTTCCCTTTTTTTTTT	44540.9
UDG_UG_f1GG_f2ACA	25813	47532	47532	0	CGCGAGCTCGGUACACTCGCGGGAACGCGAGTGTGCCGAGCTCGCGACACTCTTTCCCTTTTTTTTTT	50106.7
UDG_UG_f1GT_f2AGT	23703	43375	43375	0	CGCGAGCTCGTUAGTCTCGCGGGAACGCGAGACTGACGAGCTCGCGACACTCTTTCCCTTTTTTTTTT	45628.6
UDG_UG_f1CG_f2CCG	30372	55741	56852	0	CGCGAGCTCCGUCCGCTCGCGGGAACGCGAGCGGGCGGAGCTCGCGACACTCTTTCCCTTTTTTTTTT	59576.8
UDG_UG_f1GT_f2CAT	25668	47243	47243	0	CGCGAGCTCGTUCATCTCGCGGGAACGCGAGATGGACGAGCTCGCGACACTCTTTCCCTTTTTTTTTT	49383.7
UDG_UG_f1AG_f2ACT	26121	47740	47740	0	CGCGAGCTCAGUACTCTCGCGGGAACGCGAGAGTGCTGAGCTCGCGACACTCTTTCCCTTTTTTTTTT	49657.4
UDG_UG_f1CG_f2GCT	26640	48365	48365	0	CGCGAGCTCCGUGCTCTCGCGGGAACGCGAGAGCGCGGAGCTCGCGACACTCTTTCCCTTTTTTTTTT	50082.5
UDG_UG_f1CC_f2TAA	23571	42932	42932	0	CGCGAGCTCCCUTAACTCGCGGGAACGCGAGTTAGGGGAGCTCGCGACACTCTTTCCCTTTTTTTTTT	44441.3
UDG_UG_f1TC_f2AAT	23909	43661	43661	0	CGCGAGCTCTCUAATCTCGCGGGAACGCGAGATTGGAGAGCTCGCGACACTCTTTCCCTTTTTTTTTT	45211.5
UDG_MM_TT	7831	14323	14323	0	CGCGAGCTCACTCTTACCGCGGGAACGCGGTAAGTGTGAGCTCGCGACACTCTTTCCCTTTTTTTTTT	14898.3
UDG_UG_f1AG_f2TAC	24641	45130	45130	0	CGCGAGCTCAGUTACCTCGCGGGAACGCGAGGTAGCTGAGCTCGCGACACTCTTTCCCTTTTTTTTTT	46910.2
UDG_UG_f1TG_f2GGG	25587	46663	46663	0	CGCGAGCTCTGUGGGCTCGCGGGAACGCGAGCCCGCAGAGCTCGCGACACTCTTTCCCTTTTTTTTTT	48320.1
UDG_UG_f1GC_f2AGG	24941	45156	45156	0	CGCGAGCTCGCUAGGCTCGCGGGAACGCGAGCCTGGCGAGCTCGCGACACTCTTTCCCTTTTTTTTTT	46759.6
UDG_UG_f1TT_f2AAT	24238	44239	44239	0	CGCGAGCTCTTUAATCTCGCGGGAACGCGAGATTGAAGAGCTCGCGACACTCTTTCCCTTTTTTTTTT	45432.9
UDG_UG_f1GC_f2AGG	24775	45348	45348	0	CGCGAGCTCGCUAGGCTCGCGGGAACGCGAGCCTGGCGAGCTCGCGACACTCTTTCCCTTTTTTTTTT	46674.4
UDG_UG_f1GT_f2CCA	27162	49483	49483	0	CGCGAGCTCGTUCCACTCGCGGGAACGCGAGTGGGACGAGCTCGCGACACTCTTTCCCTTTTTTTTTT	50769.7
UDG_UG_f1TT_f2GGC	26930	49324	49324	0	CGCGAGCTCTTUGGCCTCGCGGGAACGCGAGGCCGAAGAGCTCGCGACACTCTTTCCCTTTTTTTTTT	50449.6
UDG_UG_f1AA_f2AAC	27622	50485	51947	0	CGCGAGCTCAAUAACCTCGCGGGAACGCGAGGTTGTTGAGCTCGCGACACTCTTTCCCTTTTTTTTTT	53348.9
UDG_UG_f1GG_f2CCG	30210	55061	56563	0	CGCGAGCTCGGUCCGCTCGCGGGAACGCGAGCGGGCCGAGCTCGCGACACTCTTTCCCTTTTTTTTTT	58374.6
UDG_UG_f1GG_f2TAG	23310	42679	42679	0	CGCGAGCTCGGUTAGCTCGCGGGAACGCGAGCTAGCCGAGCTCGCGACACTCTTTCCCTTTTTTTTTT	44039.3
UDG_UG_f1GT_f2GGG	26587	48630	48630	0	CGCGAGCTCGTUGGGCTCGCGGGAACGCGAGCCCGACGAGCTCGCGACACTCTTTCCCTTTTTTTTTT	50154.2
UDG_UG_f1CC_f2CGT	27766	51010	52204	0	CGCGAGCTCCCUCGTCTCGCGGGAACGCGAGACGGGGGAGCTCGCGACACTCTTTCCCTTTTTTTTTT	53876
UDG_UG_f1AA_f2AAT	28187	51659	52955	0	CGCGAGCTCAAUAATCTCGCGGGAACGCGAGATTGTTGAGCTCGCGACACTCTTTCCCTTTTTTTTTT	54541.1
UDG_UG_f1AG_f2TGC	26299	48071	48071	0	CGCGAGCTCAGUTGCCTCGCGGGAACGCGAGGCAGCTGAGCTCGCGACACTCTTTCCCTTTTTTTTTT	49330.4
UDG_UG_f1GG_f2ATA	25172	45908	45908	0	CGCGAGCTCGGUATACTCGCGGGAACGCGAGTATGCCGAGCTCGCGACACTCTTTCCCTTTTTTTTTT	47006.6
UDG_UG_f1TA_f2AGA	24813	45448	45448	0	CGCGAGCTCTAUAGACTCGCGGGAACGCGAGTCTGTAGAGCTCGCGACACTCTTTCCCTTTTTTTTTT	46809.3
UDG_UG_f1AT_f2CCG	24814	45315	45315	0	CGCGAGCTCATUCCGCTCGCGGGAACGCGAGCGGGATGAGCTCGCGACACTCTTTCCCTTTTTTTTTT	46765.3
UDG_UG_f1AT_f2ATG	24568	44947	44947	0	CGCGAGCTCATUATGCTCGCGGGAACGCGAGCATGATGAGCTCGCGACACTCTTTCCCTTTTTTTTTT	46403.4
UDG_UG_f1TA_f2TGA	24051	44213	44213	0	CGCGAGCTCTAUTGACTCGCGGGAACGCGAGTCAGTAGAGCTCGCGACACTCTTTCCCTTTTTTTTTT	45792.9
UDG_UG_f1GG_f2AAT	25475	46630	46630	0	CGCGAGCTCGGUAATCTCGCGGGAACGCGAGATTGCCGAGCTCGCGACACTCTTTCCCTTTTTTTTTT	48557.4
UDG_UG_f1GA_f2GAT	26764	49125	49125	0	CGCGAGCTCGAUGATCTCGCGGGAACGCGAGATCGTCGAGCTCGCGACACTCTTTCCCTTTTTTTTTT	51354.3
UDG_UG_f1TG_f2GGT	26751	48951	48951	0	CGCGAGCTCTGUGGTCTCGCGGGAACGCGAGACCGCAGAGCTCGCGACACTCTTTCCCTTTTTTTTTT	51577.7
UDG_UG_f1CC_f2GAA	25492	46655	46655	0	CGCGAGCTCCCUGAACTCGCGGGAACGCGAGTTCGGGGAGCTCGCGACACTCTTTCCCTTTTTTTTTT	49581.6
UDG_UG_f1GT_f2ACA	24632	45253	45253	0	CGCGAGCTCGTUACACTCGCGGGAACGCGAGTGTGACGAGCTCGCGACACTCTTTCCCTTTTTTTTTT	48091.6
UDG_UG_f1AC_f2GCC	26338	48366	48366	0	CGCGAGCTCACUGCCCTCGCGGGAACGCGAGGGCGGTGAGCTCGCGACACTCTTTCCCTTTTTTTTTT	51399.9
UDG_UG_f1TA_f2CTC	24626	45334	45334	0	CGCGAGCTCTAUCTCCTCGCGGGAACGCGAGGAGGTAGAGCTCGCGACACTCTTTCCCTTTTTTTTTT	48177.7
UDG_UG_f1AC_f2TAT	21881	40012	40012	0	CGCGAGCTCACUTATCTCGCGGGAACGCGAGATAGGTGAGCTCGCGACACTCTTTCCCTTTTTTTTTT	42521.9
UDG_UG_f1TG_f2CCA	24140	44178	44178	0	CGCGAGCTCTGUCCACTCGCGGGAACGCGAGTGGGCAGAGCTCGCGACACTCTTTCCCTTTTTTTTTT	46949.2
UDG_UG_f1CT_f2TGC	19793	36129	36129	0	CGCGAGCTCCTUTGCCTCGCGGGAACGCGAGGCAGAGGAGCTCGCGACACTCTTTCCCTTTTTTTTTT	38395.3
UDG_UG_f1TC_f2GGA	22566	41429	41429	0	CGCGAGCTCTCUGGACTCGCGGGAACGCGAGTCCGGAGAGCTCGCGACACTCTTTCCCTTTTTTTTTT	44027.7
UDG_UG_f1CC_f2CTC	29808	54624	55846	0	CGCGAGCTCCCUCTCCTCGCGGGAACGCGAGGAGGGGGAGCTCGCGACACTCTTTCCCTTTTTTTTTT	57492.9
UDG_UG_f1GA_f2TTC	29666	54105	55593	0	CGCGAGCTCGAUTTCCTCGCGGGAACGCGAGGAAGTCGAGCTCGCGACACTCTTTCCCTTTTTTTTTT	57232.5
UDG_UG_f1AC_f2ATG	26459	47766	47766	0	CGCGAGCTCACUATGCTCGCGGGAACGCGAGCATGGTGAGCTCGCGACACTCTTTCCCTTTTTTTTTT	49174.6
UDG_UG_f1CG_f2AGT	26937	48997	48997	0	CGCGAGCTCCGUAGTCTCGCGGGAACGCGAGACTGCGGAGCTCGCGACACTCTTTCCCTTTTTTTTTT	50441.9
UDG_UG_f1AG_f2CAA	28084	51409	52771	0	CGCGAGCTCAGUCAACTCGCGGGAACGCGAGTTGGCTGAGCTCGCGACACTCTTTCCCTTTTTTTTTT	54327.2
UDG_UG_f1CC_f2ACA	27055	49390	49390	0	CGCGAGCTCCCUACACTCGCGGGAACGCGAGTGTGGGGAGCTCGCGACACTCTTTCCCTTTTTTTTTT	50846.5
UDG_UG_f1TG_f2GAA	24877	45302	45302	0	CGCGAGCTCTGUGAACTCGCGGGAACGCGAGTTCGCAGAGCTCGCGACACTCTTTCCCTTTTTTTTTT	46638
UDG_UG_f1AC_f2GAT	24592	44612	44612	0	CGCGAGCTCACUGATCTCGCGGGAACGCGAGATCGGTGAGCTCGCGACACTCTTTCCCTTTTTTTTTT	45927.6
UDG_UG_f1GG_f2TTA	24855	45615	45615	0	CGCGAGCTCGGUTTACTCGCGGGAACGCGAGTAAGCCGAGCTCGCGACACTCTTTCCCTTTTTTTTTT	47328.5
UDG_UG_f1GT_f2ATC	23455	42999	42999	0	CGCGAGCTCGTUATCCTCGCGGGAACGCGAGGATGACGAGCTCGCGACACTCTTTCCCTTTTTTTTTT	44855.8
UDG_UG_f1GC_f2CCC	25510	46922	46922	0	CGCGAGCTCGCUCCCCTCGCGGGAACGCGAGGGGGGCGAGCTCGCGACACTCTTTCCCTTTTTTTTTT	49174.1
UDG_UG_f1CC_f2ACC	23963	44065	44065	0	CGCGAGCTCCCUACCCTCGCGGGAACGCGAGGGTGGGGAGCTCGCGACACTCTTTCCCTTTTTTTTTT	46448.8
UDG_UG_f1CA_f2GCC	26989	49300	49300	0	CGCGAGCTCCAUGCCCTCGCGGGAACGCGAGGGCGTGGAGCTCGCGACACTCTTTCCCTTTTTTTTTT	51967
UDG_random_6b_5	9782	17889	17889	0	CGCGAGCTCTACTCGCTCGCGGGAACGCGAGCGAGTAGAGCTCGCGACACTCTTTCCCTTTTTTTTTT	18765.6
UDG_UG_f1GA_f2GAA	26017	47700	47700	0	CGCGAGCTCGAUGAACTCGCGGGAACGCGAGTTCGTCGAGCTCGCGACACTCTTTCCCTTTTTTTTTT	50103.9
UDG_UG_f1CT_f2CGC	27154	50015	51113	0	CGCGAGCTCCTUCGCCTCGCGGGAACGCGAGGCGGAGGAGCTCGCGACACTCTTTCCCTTTTTTTTTT	53566.2
UDG_UG_f1TA_f2ATA	26514	48484	48484	0	CGCGAGCTCTAUATACTCGCGGGAACGCGAGTATGTAGAGCTCGCGACACTCTTTCCCTTTTTTTTTT	50811
UDG_UG_f1CG_f2GCT	27315	50086	51400	0	CGCGAGCTCCGUGCTCTCGCGGGAACGCGAGAGCGCGGAGCTCGCGACACTCTTTCCCTTTTTTTTTT	53827.2
UDG_UG_f1GG_f2AAC	25544	46955	46955	0	CGCGAGCTCGGUAACCTCGCGGGAACGCGAGGTTGCCGAGCTCGCGACACTCTTTCCCTTTTTTTTTT	48966.7
UDG_UG_f1TC_f2CAC	25645	47111	47111	0	CGCGAGCTCTCUCACCTCGCGGGAACGCGAGGTGGGAGAGCTCGCGACACTCTTTCCCTTTTTTTTTT	48814.4
UDG_UG_f1AA_f2CTA	26447	48391	48391	0	CGCGAGCTCAAUCTACTCGCGGGAACGCGAGTAGGTTGAGCTCGCGACACTCTTTCCCTTTTTTTTTT	50140.7
UDG_UG_f1CT_f2CCG	26250	48135	48135	0	CGCGAGCTCCTUCCGCTCGCGGGAACGCGAGCGGGAGGAGCTCGCGACACTCTTTCCCTTTTTTTTTT	49747
UDG_UG_f1CC_f2GAC	26396	48334	48334	0	CGCGAGCTCCCUGACCTCGCGGGAACGCGAGGTCGGGGAGCTCGCGACACTCTTTCCCTTTTTTTTTT	50032.1
UDG_UG_f1GC_f2TCT	24022	44149	44149	0	CGCGAGCTCGCUTCTCTCGCGGGAACGCGAGAGAGGCGAGCTCGCGACACTCTTTCCCTTTTTTTTTT	45700.1
UDG_UG_f1CT_f2TGG	21475	39295	39295	0	CGCGAGCTCCTUTGGCTCGCGGGAACGCGAGCCAGAGGAGCTCGCGACACTCTTTCCCTTTTTTTTTT	40694.8
UDG_UG_f1TA_f2GCT	24430	44994	44994	0	CGCGAGCTCTAUGCTCTCGCGGGAACGCGAGAGCGTAGAGCTCGCGACACTCTTTCCCTTTTTTTTTT	46940
UDG_UG_f1CC_f2CGA	26423	48392	48392	0	CGCGAGCTCCCUCGACTCGCGGGAACGCGAGTCGGGGGAGCTCGCGACACTCTTTCCCTTTTTTTTTT	50634.2
UDG_UG_f1GG_f2GGA	26601	48988	48988	0	CGCGAGCTCGGUGGACTCGCGGGAACGCGAGTCCGCCGAGCTCGCGACACTCTTTCCCTTTTTTTTTT	51301.3
UDG_UG_f1AT_f2GGT	25667	47050	47050	0	CGCGAGCTCATUGGTCTCGCGGGAACGCGAGACCGATGAGCTCGCGACACTCTTTCCCTTTTTTTTTT	49323.2
UDG_UG_f1TC_f2TTA	23082	42458	42458	0	CGCGAGCTCTCUTTACTCGCGGGAACGCGAGTAAGGAGAGCTCGCGACACTCTTTCCCTTTTTTTTTT	44449.4
UDG_UG_f1CT_f2GTG	25183	46161	46161	0	CGCGAGCTCCTUGTGCTCGCGGGAACGCGAGCACGAGGAGCTCGCGACACTCTTTCCCTTTTTTTTTT	48299.8
UDG_UG_f1CA_f2GCG	27008	49309	49309	0	CGCGAGCTCCAUGCGCTCGCGGGAACGCGAGCGCGTGGAGCTCGCGACACTCTTTCCCTTTTTTTTTT	51780.4
UDG_UG_f1CA_f2TGA	23197	42381	42381	0	CGCGAGCTCCAUTGACTCGCGGGAACGCGAGTCAGTGGAGCTCGCGACACTCTTTCCCTTTTTTTTTT	44505.2
UDG_UG_f1GT_f2ACT	23051	42273	42273	0	CGCGAGCTCGTUACTCTCGCGGGAACGCGAGAGTGACGAGCTCGCGACACTCTTTCCCTTTTTTTTTT	44461.6
UDG_UG_f1GT_f2TAG	21237	38805	38805	0	CGCGAGCTCGTUTAGCTCGCGGGAACGCGAGCTAGACGAGCTCGCGACACTCTTTCCCTTTTTTTTTT	40879.2
UDG_UG_f1AC_f2GAC	24143	44323	44323	0	CGCGAGCTCACUGACCTCGCGGGAACGCGAGGTCGGTGAGCTCGCGACACTCTTTCCCTTTTTTTTTT	46723.8
UDG_UG_f1GA_f2CCT	26919	49389	49389	0	CGCGAGCTCGAUCCTCTCGCGGGAACGCGAGAGGGTCGAGCTCGCGACACTCTTTCCCTTTTTTTTTT	52143
UDG_UG_f1GA_f2AAA	25922	47492	47492	0	CGCGAGCTCGAUAAACTCGCGGGAACGCGAGTTTGTCGAGCTCGCGACACTCTTTCCCTTTTTTTTTT	49972.6
UDG_UG_f1GC_f2TTC	23709	43340	43340	0	CGCGAGCTCGCUTTCCTCGCGGGAACGCGAGGAAGGCGAGCTCGCGACACTCTTTCCCTTTTTTTTTT	45556
UDG_UG_f1GT_f2TAG	21706	39728	39728	0	CGCGAGCTCGTUTAGCTCGCGGGAACGCGAGCTAGACGAGCTCGCGACACTCTTTCCCTTTTTTTTTT	41591.3
UDG_UG_f1AT_f2GCC	24271	44653	44653	0	CGCGAGCTCATUGCCCTCGCGGGAACGCGAGGGCGATGAGCTCGCGACACTCTTTCCCTTTTTTTTTT	46454.5
UDG_UG_f1TC_f2TAA	22367	40788	40788	0	CGCGAGCTCTCUTAACTCGCGGGAACGCGAGTTAGGAGAGCTCGCGACACTCTTTCCCTTTTTTTTTT	42259.2
UDG_UC_randomFlank	26380	48199	48199	0	CGCGAGCTCACUCTACGCGCGGGAACGCGCGTAGCGTGAGCTCGCGACACTCTTTCCCTTTTTTTTTT	49893.5
UDG_UG_f1GG_f2CGT	28132	51194	52857	0	CGCGAGCTCGGUCGTCTCGCGGGAACGCGAGACGGCCGAGCTCGCGACACTCTTTCCCTTTTTTTTTT	54752.9
UDG_UG_f1CC_f2GGA	25831	46970	46970	0	CGCGAGCTCCCUGGACTCGCGGGAACGCGAGTCCGGGGAGCTCGCGACACTCTTTCCCTTTTTTTTTT	48856.5
UDG_UG_f1GA_f2ATC	27390	50002	51534	0	CGCGAGCTCGAUATCCTCGCGGGAACGCGAGGATGTCGAGCTCGCGACACTCTTTCCCTTTTTTTTTT	53566.8
UDG_UG_f1AC_f2AGG	23847	43379	43379	0	CGCGAGCTCACUAGGCTCGCGGGAACGCGAGCCTGGTGAGCTCGCGACACTCTTTCCCTTTTTTTTTT	44824
UDG_UG_f1GT_f2GGG	25295	46391	46391	0	CGCGAGCTCGTUGGGCTCGCGGGAACGCGAGCCCGACGAGCTCGCGACACTCTTTCCCTTTTTTTTTT	47936.4
UDG_UG_f1GT_f2CAA	24439	44587	44587	0	CGCGAGCTCGTUCAACTCGCGGGAACGCGAGTTGGACGAGCTCGCGACACTCTTTCCCTTTTTTTTTT	45746.4
UDG_UG_f1TT_f2TTG	22780	41605	41605	0	CGCGAGCTCTTUTTGCTCGCGGGAACGCGAGCAAGAAGAGCTCGCGACACTCTTTCCCTTTTTTTTTT	42727.8
UDG_UG_f1CA_f2CCA	28013	51094	52645	0	CGCGAGCTCCAUCCACTCGCGGGAACGCGAGTGGGTGGAGCTCGCGACACTCTTTCCCTTTTTTTTTT	53935.8
UDG_UG_f1GC_f2ATT	25020	45594	45594	0	CGCGAGCTCGCUATTCTCGCGGGAACGCGAGAATGGCGAGCTCGCGACACTCTTTCCCTTTTTTTTTT	46634.5
UDG_UG_f1AT_f2AAG	23174	42549	42549	0	CGCGAGCTCATUAAGCTCGCGGGAACGCGAGCTTGATGAGCTCGCGACACTCTTTCCCTTTTTTTTTT	43697.3
UDG_UG_f1CT_f2TAA	22212	40794	40794	0	CGCGAGCTCCTUTAACTCGCGGGAACGCGAGTTAGAGGAGCTCGCGACACTCTTTCCCTTTTTTTTTT	42127.6
UDG_UG_f1TT_f2ATT	24582	45039	45039	0	CGCGAGCTCTTUATTCTCGCGGGAACGCGAGAATGAAGAGCTCGCGACACTCTTTCCCTTTTTTTTTT	46511.4
UDG_UG_f1CA_f2TAG	23690	43386	43386	0	CGCGAGCTCCAUTAGCTCGCGGGAACGCGAGCTAGTGGAGCTCGCGACACTCTTTCCCTTTTTTTTTT	44775.5
UDG_UG_f1CG_f2TTA	24340	44485	44485	0	CGCGAGCTCCGUTTACTCGCGGGAACGCGAGTAAGCGGAGCTCGCGACACTCTTTCCCTTTTTTTTTT	45935.3
UDG_UG_f1TA_f2CCG	24783	45550	45550	0	CGCGAGCTCTAUCCGCTCGCGGGAACGCGAGCGGGTAGAGCTCGCGACACTCTTTCCCTTTTTTTTTT	47008.9
UDG_UG_f1TA_f2AGG	25042	45818	45818	0	CGCGAGCTCTAUAGGCTCGCGGGAACGCGAGCCTGTAGAGCTCGCGACACTCTTTCCCTTTTTTTTTT	47054.5
UDG_UG_f1CC_f2AGG	24753	45323	45323	0	CGCGAGCTCCCUAGGCTCGCGGGAACGCGAGCCTGGGGAGCTCGCGACACTCTTTCCCTTTTTTTTTT	46510.4
UDG_UG_f1AT_f2TTA	23226	42428	42428	0	CGCGAGCTCATUTTACTCGCGGGAACGCGAGTAAGATGAGCTCGCGACACTCTTTCCCTTTTTTTTTT	43794.4
UDG_UG_f1AC_f2GAT	24801	45276	45276	0	CGCGAGCTCACUGATCTCGCGGGAACGCGAGATCGGTGAGCTCGCGACACTCTTTCCCTTTTTTTTTT	46756.1
UDG_UG_f1TT_f2AAC	24082	43945	43945	0	CGCGAGCTCTTUAACCTCGCGGGAACGCGAGGTTGAAGAGCTCGCGACACTCTTTCCCTTTTTTTTTT	45579.1
UDG_UG_f1AA_f2GTA	27747	50839	52170	0	CGCGAGCTCAAUGTACTCGCGGGAACGCGAGTACGTTGAGCTCGCGACACTCTTTCCCTTTTTTTTTT	54148.4
UDG_UG_f1GG_f2TCT	26254	47915	47915	0	CGCGAGCTCGGUTCTCTCGCGGGAACGCGAGAGAGCCGAGCTCGCGACACTCTTTCCCTTTTTTTTTT	49958.1
UDG_UG_f1GC_f2GCG	27744	50641	52165	0	CGCGAGCTCGCUGCGCTCGCGGGAACGCGAGCGCGGCGAGCTCGCGACACTCTTTCCCTTTTTTTTTT	54721.1
UDG_UG_f1AC_f2ATC	25306	46131	46131	0	CGCGAGCTCACUATCCTCGCGGGAACGCGAGGATGGTGAGCTCGCGACACTCTTTCCCTTTTTTTTTT	48642.5
UDG_UG_f1GT_f2CCG	26246	47550	47550	0	CGCGAGCTCGTUCCGCTCGCGGGAACGCGAGCGGGACGAGCTCGCGACACTCTTTCCCTTTTTTTTTT	50546.1
UDG_UG_f1CC_f2CGG	26344	48128	48128	0	CGCGAGCTCCCUCGGCTCGCGGGAACGCGAGCCGGGGGAGCTCGCGACACTCTTTCCCTTTTTTTTTT	51160.5
UDG_UG_f1CT_f2CAT	24234	44145	44145	0	CGCGAGCTCCTUCATCTCGCGGGAACGCGAGATGGAGGAGCTCGCGACACTCTTTCCCTTTTTTTTTT	46926.5
UDG_UG_f1TA_f2TTC	25744	47103	47103	0	CGCGAGCTCTAUTTCCTCGCGGGAACGCGAGGAAGTAGAGCTCGCGACACTCTTTCCCTTTTTTTTTT	50070.9
UDG_UG_f1CA_f2AAT	24261	44208	44208	0	CGCGAGCTCCAUAATCTCGCGGGAACGCGAGATTGTGGAGCTCGCGACACTCTTTCCCTTTTTTTTTT	46993.5
UDG_UG_f1TG_f2TGA	19787	36123	36123	0	CGCGAGCTCTGUTGACTCGCGGGAACGCGAGTCAGCAGAGCTCGCGACACTCTTTCCCTTTTTTTTTT	38399.1
UDG_UG_f1CC_f2CAT	21349	39479	39479	0	CGCGAGCTCCCUCATCTCGCGGGAACGCGAGATGGGGGAGCTCGCGACACTCTTTCCCTTTTTTTTTT	41966.5
UDG_UG_f1CG_f2GAG	20746	37975	37975	0	CGCGAGCTCCGUGAGCTCGCGGGAACGCGAGCTCGCGGAGCTCGCGACACTCTTTCCCTTTTTTTTTT	40367.8
UDG_UG_f1TA_f2TTG	26251	48104	48104	0	CGCGAGCTCTAUTTGCTCGCGGGAACGCGAGCAAGTAGAGCTCGCGACACTCTTTCCCTTTTTTTTTT	49398
UDG_UG_f1GA_f2TAC	28170	51554	52925	0	CGCGAGCTCGAUTACCTCGCGGGAACGCGAGGTAGTCGAGCTCGCGACACTCTTTCCCTTTTTTTTTT	54348.7
UDG_UG_f1GG_f2AGC	28293	51636	53144	0	CGCGAGCTCGGUAGCCTCGCGGGAACGCGAGGCTGCCGAGCTCGCGACACTCTTTCCCTTTTTTTTTT	54573.6
UDG_UG_f1GC_f2ACT	27161	49248	49248	0	CGCGAGCTCGCUACTCTCGCGGGAACGCGAGAGTGGCGAGCTCGCGACACTCTTTCCCTTTTTTTTTT	50572.8
UDG_UG_f1GT_f2AAG	22686	41495	41495	0	CGCGAGCTCGTUAAGCTCGCGGGAACGCGAGCTTGACGAGCTCGCGACACTCTTTCCCTTTTTTTTTT	42611.2
UDG_MM_CA	8397	15388	15388	0	CGCGAGCTCACCCTTACCGCGGGAACGCGGTAAGAGTGAGCTCGCGACACTCTTTCCCTTTTTTTTTT	15801.9
UDG_UG_f1AT_f2TCC	21657	39661	39661	0	CGCGAGCTCATUTCCCTCGCGGGAACGCGAGGGAGATGAGCTCGCGACACTCTTTCCCTTTTTTTTTT	40727.9
UDG_UG_f1TT_f2ATA	24177	44283	44283	0	CGCGAGCTCTTUATACTCGCGGGAACGCGAGTATGAAGAGCTCGCGACACTCTTTCCCTTTTTTTTTT	45474.2
UDG_UG_f1GG_f2ATA	24523	44977	44977	0	CGCGAGCTCGGUATACTCGCGGGAACGCGAGTATGCCGAGCTCGCGACACTCTTTCCCTTTTTTTTTT	46376.8
UDG_UG_f1GA_f2TTT	24536	45117	45117	0	CGCGAGCTCGAUTTTCTCGCGGGAACGCGAGAAAGTCGAGCTCGCGACACTCTTTCCCTTTTTTTTTT	46837
UDG_UG_f1TC_f2AGG	20987	38104	38104	0	CGCGAGCTCTCUAGGCTCGCGGGAACGCGAGCCTGGAGAGCTCGCGACACTCTTTCCCTTTTTTTTTT	39627.6
UDG_UG_f1AG_f2AGA	21499	39661	39661	0	CGCGAGCTCAGUAGACTCGCGGGAACGCGAGTCTGCTGAGCTCGCGACACTCTTTCCCTTTTTTTTTT	41373.7
UDG_UG_f1AT_f2CTA	22923	42149	42149	0	CGCGAGCTCATUCTACTCGCGGGAACGCGAGTAGGATGAGCTCGCGACACTCTTTCCCTTTTTTTTTT	43961.5
UDG_UG_f1CG_f2TCA	23310	42653	42653	0	CGCGAGCTCCGUTCACTCGCGGGAACGCGAGTGAGCGGAGCTCGCGACACTCTTTCCCTTTTTTTTTT	44358.4
UDG_UG_f1GG_f2GGA	26663	49041	49041	0	CGCGAGCTCGGUGGACTCGCGGGAACGCGAGTCCGCCGAGCTCGCGACACTCTTTCCCTTTTTTTTTT	51149.9
UDG_UG_f1CC_f2CCA	27443	50198	51628	0	CGCGAGCTCCCUCCACTCGCGGGAACGCGAGTGGGGGGAGCTCGCGACACTCTTTCCCTTTTTTTTTT	53840
UDG_UG_f1TC_f2GCG	24180	44286	44286	0	CGCGAGCTCTCUGCGCTCGCGGGAACGCGAGCGCGGAGAGCTCGCGACACTCTTTCCCTTTTTTTTTT	46183.4
UDG_UG_f1AA_f2GTC	27345	50130	51453	0	CGCGAGCTCAAUGTCCTCGCGGGAACGCGAGGACGTTGAGCTCGCGACACTCTTTCCCTTTTTTTTTT	53510.3
UDG_UG_f1CA_f2GCC	28003	51310	52627	0	CGCGAGCTCCAUGCCCTCGCGGGAACGCGAGGGCGTGGAGCTCGCGACACTCTTTCCCTTTTTTTTTT	54695.8
UDG_UG_f1CA_f2AGG	25007	45941	45941	0	CGCGAGCTCCAUAGGCTCGCGGGAACGCGAGCCTGTGGAGCTCGCGACACTCTTTCCCTTTTTTTTTT	47479.5
UDG_UG_f1AG_f2CCC	31045	56968	58052	0	CGCGAGCTCAGUCCCCTCGCGGGAACGCGAGGGGGCTGAGCTCGCGACACTCTTTCCCTTTTTTTTTT	60045.1
UDG_UG_f1AT_f2ATC	25270	46179	46179	0	CGCGAGCTCATUATCCTCGCGGGAACGCGAGGATGATGAGCTCGCGACACTCTTTCCCTTTTTTTTTT	47725.5
UDG_UG_f1AG_f2GTT	26547	48460	48460	0	CGCGAGCTCAGUGTTCTCGCGGGAACGCGAGAACGCTGAGCTCGCGACACTCTTTCCCTTTTTTTTTT	50123.8
UDG_UG_f1GA_f2ATG	26821	48901	48901	0	CGCGAGCTCGAUATGCTCGCGGGAACGCGAGCATGTCGAGCTCGCGACACTCTTTCCCTTTTTTTTTT	50538.7
UDG_UG_f1AA_f2CAT	26969	49424	49424	0	CGCGAGCTCAAUCATCTCGCGGGAACGCGAGATGGTTGAGCTCGCGACACTCTTTCCCTTTTTTTTTT	51079.2
UDG_UG_f1GG_f2CCT	29343	53852	55017	0	CGCGAGCTCGGUCCTCTCGCGGGAACGCGAGAGGGCCGAGCTCGCGACACTCTTTCCCTTTTTTTTTT	57298.5
UDG_UG_f1GT_f2CCG	24998	45859	45859	0	CGCGAGCTCGTUCCGCTCGCGGGAACGCGAGCGGGACGAGCTCGCGACACTCTTTCCCTTTTTTTTTT	47842.4
UDG_UG_f1CA_f2GAA	24692	45190	45190	0	CGCGAGCTCCAUGAACTCGCGGGAACGCGAGTTCGTGGAGCTCGCGACACTCTTTCCCTTTTTTTTTT	47283.8
UDG_UG_f1AG_f2TGG	22368	40902	40902	0	CGCGAGCTCAGUTGGCTCGCGGGAACGCGAGCCAGCTGAGCTCGCGACACTCTTTCCCTTTTTTTTTT	42872.6
UDG_UG_f1TG_f2GTA	26537	48895	48895	0	CGCGAGCTCTGUGTACTCGCGGGAACGCGAGTACGCAGAGCTCGCGACACTCTTTCCCTTTTTTTTTT	51160.5
UDG_MM_CC	7494	13791	13791	0	CGCGAGCTCACCCTTACCGCGGGAACGCGGTAAGCGTGAGCTCGCGACACTCTTTCCCTTTTTTTTTT	14408.7
UDG_Uloop	24948	45683	45683	0	CGCGAGCTCGGCTATCTCGCGGUAACGCGAGATAGCCGAGCTCGCGACACTCTTTCCCTTTTTTTTTT	47825.6
UDG_UG_f1GC_f2AAC	24800	45454	45454	0	CGCGAGCTCGCUAACCTCGCGGGAACGCGAGGTTGGCGAGCTCGCGACACTCTTTCCCTTTTTTTTTT	47643.9
UDG_UG_f1CT_f2TCC	21623	39686	39686	0	CGCGAGCTCCTUTCCCTCGCGGGAACGCGAGGGAGAGGAGCTCGCGACACTCTTTCCCTTTTTTTTTT	41680.6
UDG_UG_f1GA_f2TAG	23667	43136	43136	0	CGCGAGCTCGAUTAGCTCGCGGGAACGCGAGCTAGTCGAGCTCGCGACACTCTTTCCCTTTTTTTTTT	45369.3
UDG_UG_f1GC_f2CTC	26636	48699	48699	0	CGCGAGCTCGCUCTCCTCGCGGGAACGCGAGGAGGGCGAGCTCGCGACACTCTTTCCCTTTTTTTTTT	51229.2
UDG_UG_f1AG_f2CCT	27028	49407	49407	0	CGCGAGCTCAGUCCTCTCGCGGGAACGCGAGAGGGCTGAGCTCGCGACACTCTTTCCCTTTTTTTTTT	52083.2
UDG_UG_f1CC_f2AAT	24159	44187	44187	0	CGCGAGCTCCCUAATCTCGCGGGAACGCGAGATTGGGGAGCTCGCGACACTCTTTCCCTTTTTTTTTT	46474.7
UDG_UG_f1GT_f2CGG	23829	43492	43492	0	CGCGAGCTCGTUCGGCTCGCGGGAACGCGAGCCGGACGAGCTCGCGACACTCTTTCCCTTTTTTTTTT	45715.7
UDG_UG_f1GT_f2GCT	24449	44739	44739	0	CGCGAGCTCGTUGCTCTCGCGGGAACGCGAGAGCGACGAGCTCGCGACACTCTTTCCCTTTTTTTTTT	46837.4
UDG_UG_f1AC_f2ACT	24167	44432	44432	0	CGCGAGCTCACUACTCTCGCGGGAACGCGAGAGTGGTGAGCTCGCGACACTCTTTCCCTTTTTTTTTT	46224.5
UDG_UG_f1GG_f2CTA	28207	51623	52991	0	CGCGAGCTCGGUCTACTCGCGGGAACGCGAGTAGGCCGAGCTCGCGACACTCTTTCCCTTTTTTTTTT	54987.5
UDG_UG_f1CG_f2TGC	25647	46789	46789	0	CGCGAGCTCCGUTGCCTCGCGGGAACGCGAGGCAGCGGAGCTCGCGACACTCTTTCCCTTTTTTTTTT	48467.2
UDG_UG_f1CA_f2AAG	24274	44185	44185	0	CGCGAGCTCCAUAAGCTCGCGGGAACGCGAGCTTGTGGAGCTCGCGACACTCTTTCCCTTTTTTTTTT	45778.7
UDG_UG_f1GC_f2TCG	23792	43298	43298	0	CGCGAGCTCGCUTCGCTCGCGGGAACGCGAGCGAGGCGAGCTCGCGACACTCTTTCCCTTTTTTTTTT	45037
UDG_UG_f1TC_f2GCG	25097	45815	45815	0	CGCGAGCTCTCUGCGCTCGCGGGAACGCGAGCGCGGAGAGCTCGCGACACTCTTTCCCTTTTTTTTTT	47622.2
UDG_UG_f1AT_f2ACT	23852	43539	43539	0	CGCGAGCTCATUACTCTCGCGGGAACGCGAGAGTGATGAGCTCGCGACACTCTTTCCCTTTTTTTTTT	45109.4
UDG_UG_f1AT_f2ACA	24631	45037	45037	0	CGCGAGCTCATUACACTCGCGGGAACGCGAGTGTGATGAGCTCGCGACACTCTTTCCCTTTTTTTTTT	46695.6
UDG_UG_f1AG_f2GGA	26523	48458	48458	0	CGCGAGCTCAGUGGACTCGCGGGAACGCGAGTCCGCTGAGCTCGCGACACTCTTTCCCTTTTTTTTTT	49765.8
UDG_UG_f1AC_f2CCA	26291	48062	48062	0	CGCGAGCTCACUCCACTCGCGGGAACGCGAGTGGGGTGAGCTCGCGACACTCTTTCCCTTTTTTTTTT	49522.8
UDG_UG_f1AA_f2TGG	24211	44185	44185	0	CGCGAGCTCAAUTGGCTCGCGGGAACGCGAGCCAGTTGAGCTCGCGACACTCTTTCCCTTTTTTTTTT	45377.4
UDG_UG_f1TG_f2GTG	25192	46123	46123	0	CGCGAGCTCTGUGTGCTCGCGGGAACGCGAGCACGCAGAGCTCGCGACACTCTTTCCCTTTTTTTTTT	47207.7
UDG_UG_f1TT_f2GTT	25172	46061	46061	0	CGCGAGCTCTTUGTTCTCGCGGGAACGCGAGAACGAAGAGCTCGCGACACTCTTTCCCTTTTTTTTTT	47304.1
UDG_MM_TG	7939	14516	14516	0	CGCGAGCTCACTCTTACCGCGGGAACGCGGTAAGGGTGAGCTCGCGACACTCTTTCCCTTTTTTTTTT	14989.3
UDG_UG_f1GT_f2ATG	24096	44141	44141	0	CGCGAGCTCGTUATGCTCGCGGGAACGCGAGCATGACGAGCTCGCGACACTCTTTCCCTTTTTTTTTT	45611.4
UDG_UG_f1GC_f2TAT	23091	42250	42250	0	CGCGAGCTCGCUTATCTCGCGGGAACGCGAGATAGGCGAGCTCGCGACACTCTTTCCCTTTTTTTTTT	43631.2
UDG_UG_f1CT_f2CCG	25358	46259	46259	0	CGCGAGCTCCTUCCGCTCGCGGGAACGCGAGCGGGAGGAGCTCGCGACACTCTTTCCCTTTTTTTTTT	47771.3
UDG_UG_f1CA_f2ATG	26054	47617	47617	0	CGCGAGCTCCAUATGCTCGCGGGAACGCGAGCATGTGGAGCTCGCGACACTCTTTCCCTTTTTTTTTT	49173.7
UDG_UG_f1CG_f2GGC	28734	52509	53931	0	CGCGAGCTCCGUGGCCTCGCGGGAACGCGAGGCCGCGGAGCTCGCGACACTCTTTCCCTTTTTTTTTT	55658.3
UDG_UG_f1GC_f2TCA	23494	43205	43205	0	CGCGAGCTCGCUTCACTCGCGGGAACGCGAGTGAGGCGAGCTCGCGACACTCTTTCCCTTTTTTTTTT	44613.6
UDG_UG_f1AA_f2TGA	24794	45517	45517	0	CGCGAGCTCAAUTGACTCGCGGGAACGCGAGTCAGTTGAGCTCGCGACACTCTTTCCCTTTTTTTTTT	47193.3
UDG_UG_f1AT_f2TCG	22712	41413	41413	0	CGCGAGCTCATUTCGCTCGCGGGAACGCGAGCGAGATGAGCTCGCGACACTCTTTCCCTTTTTTTTTT	42971.4
UDG_UG_f1GC_f2GGT	28115	51528	52827	0	CGCGAGCTCGCUGGTCTCGCGGGAACGCGAGACCGGCGAGCTCGCGACACTCTTTCCCTTTTTTTTTT	54934.5
UDG_UG_f1GA_f2AGT	26184	47920	47920	0	CGCGAGCTCGAUAGTCTCGCGGGAACGCGAGACTGTCGAGCTCGCGACACTCTTTCCCTTTTTTTTTT	49900.7
UDG_UG_f1TA_f2TAC	25787	47374	47374	0	CGCGAGCTCTAUTACCTCGCGGGAACGCGAGGTAGTAGAGCTCGCGACACTCTTTCCCTTTTTTTTTT	49469
UDG_UG_f1GG_f2CTA	29011	53051	54425	0	CGCGAGCTCGGUCTACTCGCGGGAACGCGAGTAGGCCGAGCTCGCGACACTCTTTCCCTTTTTTTTTT	57214
UDG_UG_f1TT_f2ACG	23234	42547	42547	0	CGCGAGCTCTTUACGCTCGCGGGAACGCGAGCGTGAAGAGCTCGCGACACTCTTTCCCTTTTTTTTTT	45050.8
UDG_UG_f1AG_f2TTT	25255	46117	46117	0	CGCGAGCTCAGUTTTCTCGCGGGAACGCGAGAAAGCTGAGCTCGCGACACTCTTTCCCTTTTTTTTTT	49114.9
UDG_UG_f1TG_f2TAT	23510	42970	42970	0	CGCGAGCTCTGUTATCTCGCGGGAACGCGAGATAGCAGAGCTCGCGACACTCTTTCCCTTTTTTTTTT	45763.4
UDG_UG_f1AA_f2TGA	24389	44603	44603	0	CGCGAGCTCAAUTGACTCGCGGGAACGCGAGTCAGTTGAGCTCGCGACACTCTTTCCCTTTTTTTTTT	47502.5
UDG_UG_f1CC_f2GCC	27059	49351	49351	0	CGCGAGCTCCCUGCCCTCGCGGGAACGCGAGGGCGGGGAGCTCGCGACACTCTTTCCCTTTTTTTTTT	52559.2
UDG_UG_f1TC_f2GTC	24585	45303	45303	0	CGCGAGCTCTCUGTCCTCGCGGGAACGCGAGGACGGAGAGCTCGCGACACTCTTTCCCTTTTTTTTTT	48248
UDG_UG_f1CC_f2CAA	22994	42115	42115	0	CGCGAGCTCCCUCAACTCGCGGGAACGCGAGTTGGGGGAGCTCGCGACACTCTTTCCCTTTTTTTTTT	44852.8
UDG_UG_f1AC_f2AGC	21130	38710	38710	0	CGCGAGCTCACUAGCCTCGCGGGAACGCGAGGCTGGTGAGCTCGCGACACTCTTTCCCTTTTTTTTTT	41226.4
UDG_UG_f1AA_f2GGT	23265	42650	42650	0	CGCGAGCTCAAUGGTCTCGCGGGAACGCGAGACCGTTGAGCTCGCGACACTCTTTCCCTTTTTTTTTT	45422.6
UDG_UG_f1CT_f2CGC	29589	54096	55455	0	CGCGAGCTCCTUCGCCTCGCGGGAACGCGAGGCGGAGGAGCTCGCGACACTCTTTCCCTTTTTTTTTT	56946.7
UDG_UG_f1GA_f2TGT	28616	52408	53720	0	CGCGAGCTCGAUTGTCTCGCGGGAACGCGAGACAGTCGAGCTCGCGACACTCTTTCCCTTTTTTTTTT	55165.1
UDG_UG_f1GT_f2ATT	26102	47669	47669	0	CGCGAGCTCGTUATTCTCGCGGGAACGCGAGAATGACGAGCTCGCGACACTCTTTCCCTTTTTTTTTT	48951.3
UDG_UG_f1TC_f2CGT	26922	49139	49139	0	CGCGAGCTCTCUCGTCTCGCGGGAACGCGAGACGGGAGAGCTCGCGACACTCTTTCCCTTTTTTTTTT	50460.8
UDG_UG_f1AG_f2TTT	25639	46361	46361	0	CGCGAGCTCAGUTTTCTCGCGGGAACGCGAGAAAGCTGAGCTCGCGACACTCTTTCCCTTTTTTTTTT	47608.1
UDG_UG_f1GT_f2ACT	23034	41844	41844	0	CGCGAGCTCGTUACTCTCGCGGGAACGCGAGAGTGACGAGCTCGCGACACTCTTTCCCTTTTTTTTTT	42969.6
UDG_UG_f1CG_f2ACT	26278	47745	47745	0	CGCGAGCTCCGUACTCTCGCGGGAACGCGAGAGTGCGGAGCTCGCGACACTCTTTCCCTTTTTTTTTT	49029.3
UDG_UG_f1TA_f2CAA	24723	45378	45378	0	CGCGAGCTCTAUCAACTCGCGGGAACGCGAGTTGGTAGAGCTCGCGACACTCTTTCCCTTTTTTTTTT	46598.7
UDG_UG_f1CC_f2CAC	26927	49267	49267	0	CGCGAGCTCCCUCACCTCGCGGGAACGCGAGGTGGGGGAGCTCGCGACACTCTTTCCCTTTTTTTTTT	50800.3
UDG_UG_f1CC_f2GTC	28286	51110	53132	0	CGCGAGCTCCCUGTCCTCGCGGGAACGCGAGGACGGGGAGCTCGCGACACTCTTTCCCTTTTTTTTTT	55157.6
UDG_UG_f1AT_f2CAC	23527	42910	42910	0	CGCGAGCTCATUCACCTCGCGGGAACGCGAGGTGGATGAGCTCGCGACACTCTTTCCCTTTTTTTTTT	44549.7
UDG_UG_f1CC_f2GAG	24856	45686	45686	0	CGCGAGCTCCCUGAGCTCGCGGGAACGCGAGCTCGGGGAGCTCGCGACACTCTTTCCCTTTTTTTTTT	47592.9
UDG_UG_f1AA_f2CTC	25526	46843	46843	0	CGCGAGCTCAAUCTCCTCGCGGGAACGCGAGGAGGTTGAGCTCGCGACACTCTTTCCCTTTTTTTTTT	48716
UDG_UG_f1AT_f2ACC	22587	41571	41571	0	CGCGAGCTCATUACCCTCGCGGGAACGCGAGGGTGATGAGCTCGCGACACTCTTTCCCTTTTTTTTTT	43039.8
UDG_UG_f1AC_f2CCT	25204	46389	46389	0	CGCGAGCTCACUCCTCTCGCGGGAACGCGAGAGGGGTGAGCTCGCGACACTCTTTCCCTTTTTTTTTT	48157.5
UDG_UG_f1GT_f2AAC	23066	42150	42150	0	CGCGAGCTCGTUAACCTCGCGGGAACGCGAGGTTGACGAGCTCGCGACACTCTTTCCCTTTTTTTTTT	43597.1
UDG_UG_f1GC_f2GCG	26928	49307	49307	0	CGCGAGCTCGCUGCGCTCGCGGGAACGCGAGCGCGGCGAGCTCGCGACACTCTTTCCCTTTTTTTTTT	50999.8
UDG_UG_f1AG_f2TCC	24336	44724	44724	0	CGCGAGCTCAGUTCCCTCGCGGGAACGCGAGGGAGCTGAGCTCGCGACACTCTTTCCCTTTTTTTTTT	46181.1
UDG_UG_f1AG_f2ATA	25609	46597	46597	0	CGCGAGCTCAGUATACTCGCGGGAACGCGAGTATGCTGAGCTCGCGACACTCTTTCCCTTTTTTTTTT	48115.2
UDG_UG_f1GT_f2TAT	23163	42411	42411	0	CGCGAGCTCGTUTATCTCGCGGGAACGCGAGATAGACGAGCTCGCGACACTCTTTCCCTTTTTTTTTT	43703.8
[truncated: 6,205 more rows]

## Sheet: binding_UNNNNN_UA_raw_for5t
Name	Low_488scan	High_488scan	MASLINER_adj	Flags	Sequence	variable_region	Norm
[truncated: 10,240 more rows]
